# Supplementary material for: Simple biochemical features underlie transcriptional activation domain diversity and dynamic, fuzzy binding to Mediator
Source: eLife journal article supplement (doi:10.7554/elife.68068), 2021-04-27
Supplement: supp [file elife-68068-supp-v2.zip]

Archive with 14 entries (14 files):
- elife_poa_e68068_Figure_1_figure_supplement_1.pdf
- elife_poa_e68068_Figure_2_figure_supplement_1.pdf
- elife_poa_e68068_Figure_3_figure_supplement_1.tif
- elife_poa_e68068_Figure_4_figure_supplement_1.pdf
- elife_poa_e68068_Figure_5_figure_supplement_1.tif
- elife_poa_e68068_Figure_6_figure_supplement_1.pdf
- elife_poa_e68068_Figure_7_figure_supplement_1.pdf
- elife_poa_e68068_Transparent_Reporting_File.pdf
- elife_poa_e68068_Figure_1_source_data_1.xlsx
- elife_poa_e68068_Figure_1_source_data_2.xlsx
- elife_poa_e68068_Figure_3_source_data_1.xlsx
- elife_poa_e68068_Figure_5_source_data_1.xlsx
- elife_poa_e68068_Figure_6_source_data_1.xlsx
- elife_poa_e68068_Figure_6_source_data_2.zip
