# Supplementary material for: Simple biochemical features underlie transcriptional activation domain diversity and dynamic, fuzzy binding to Mediator
Source: eLife journal article supplement (doi:10.7554/elife.68068), 2021-04-27
Supplement: supp [file elife-68068-supp-v2.zip › elife_poa_e68068_Figure_1_source_data_2.xlsx]

## Sheet: Activation domains
protein	protein ID	start	stop	maximal activation	maximal Z score	maximal fragment	sequence
GCN4	P03069	63	142	128.273	11.91	A_tiles_P03069:76	NLDFDFALPQTATAPDAKTVLPIPELDDAVVESFFSSSTDSTPMFEYENLEDNSKEWTSLFDNDIPVTTDDVSLADKAI
GAL4	P04386	832	880	44.02	9.28587	A_tiles_P04386:828	SKPLSPGWTDQTAYNAFGITTGMFNTTTMDDVYNYLFDDEDTPPNPKK
GAL4	P04386	146	199	59.6609	10.0318	A_controls-mean_GAL4	SIDSAAHHDNSTIPLDFMPRDALHGFDWSEEDDMSDGLPFLKTDPNNNGFFGD
ARG81	P05085	194	256	32.0701	8.50877	A_tiles_P05085:194	KGHVKTGILSANDGVPPTPNLLDYDWNNLNITGYEWISSELRDDALLSAVTLQGHHLGHTQP
ARG81	P05085	69	126	13.3912	6.36601	A_tiles_P05085:65	IPQNSPATTTNLSGSVDEPQYQRRNIDFVRYDEEYVYHEDMDDELTMLHTPPIEKIS
ADR1	P07248	402	455	80.712	10.7733	A_tiles_P07248:415	TVAIDNNSNNNKVSDNQPDFVDFQELLDNDTLGNDLLETTAVLKEFELLHDDS
ADR1	P07248	639	688	54.1446	9.79379	A_tiles_P07248:648	YLDLFKNNFLPHFPIIHPSLLDLDLDSLQRYTNEDGYDDAENAQLFDRL
ADR1	P07248	250	321	29.298	8.28696	A_tiles_P07248:259	PKDRVKFSTPELVPLDLKNPELDSSFDLNMNLDLNLNLDSNFNIALNRSDSSGSTMNLDYKLPESANNYTY
ADR1	P07248	324	377	14.6204	6.58149	A_tiles_P07248:324	SPTRAYVGANTNSKNASFNDADLLSSSYWIKAYNDHLFSVSESDETSPMNSEL
ADR1	P07248	479	545	10.7578	5.82875	A_tiles_P07248:492	HKLIYKNKEGTNDDMLISFGLDHPSNREDDLDKLCNMTRDVQAIFSQYLKGEESKRSLEDFLSTSN
ADR1	P07248	1192	1245	27.7365	8.15258	A_tiles_P07248:1192	SFNDTSFLNMEDPIRNEFSFDNGDRAVTDLPRSAHFLSDTGLEGINFSGLNDS
ADR1	P07248	0	49	4.19394	3.51753	A_tiles_P07248:0	MANVEKPNDCSGFPVVDLNSCFSNGFNNEKQEIEMETDDSPILLMSSSA
PHO2	P07269	0	36	23.1206	7.70597	A_tiles_P07269:0	MMEEFSYDHDFNTHFATDLDYLQHDQQQQQQQQHDQ
PHO2	P07269	428	481	19.4015	7.27568	A_tiles_P07269:415	PQQNIAPPFLNTNSSATDSNPNTNLEDSLFFDHDLLSSSITNTNNGQGSNNGR
PHO2	P07269	143	196	25.4629	7.94274	A_tiles_P07269:143	IPSSQSRDIANDYDRGSTDNNLVTTTSTSSIFHDEDLTFFDRIPLNSNNNYYF
PHO2	P07269	510	558	5.2685	4.0772	A_tiles_P07269:506	LAQEHLSNDADIVANPNDHLLSLPTDSELPNTPDFLKNTNELTDEHRW
PHO4	P07270	52	101	54.4174	9.80612	A_tiles_P07270:39	QENHNSSENGNENENEQDSLALDDLDRAFELVEGMDMDWMMPSHAHHSP
PPR1	P07272	774	903	58.6666	9.9906	A_tiles_P07272:787	YDKKTNVLGFDDGTFDNKVFNRTNFEEKAPFDIPLDEFFTELEKHSNVSQFNTLDVSEGNQVINESASTNTSSALNCQSYTNNQDIMDILFQVTSGSVWDEFFVRSGNGNEGESSYDISKGKNSESGGI
PPR1	P07272	322	375	17.4757	7.01919	A_tiles_P07272:322	ALASDQTGINSAFEIPITSAFSAHTEPKRENVTEKIDVCSSVDVPWYDTWETS
SWI5	P08153	0	117	30.9245	8.41953	A_tiles_P08153:51	MDTSNSWFDASKVQSLNFDLQTNSYYSNARGSDPSSYAIEGEYKTLATDDLGNILNLNYGETNEVIMNEINDLNLPLGPLSDEKSVKVSTFSELIGNDWQSMNFDLENNSREVTLNA
LEU3	P08638	833	885	17.5036	7.0231	A_tiles_P08638:833	LLETYPIVQSNPVTTTIKESPNSIMAGWDNWESDMVWRDVDILMNEFAFNPK
HAP1	P0CE41	1397	1459	14.0098	6.47681	A_tiles_P0CE41:1397	TLTSPQGSDLASNSATQYKPDLEDFLMQNSNFNGLMINPSSLVEVVGGYNDPNNLGRNDAVD
HSF1	P10961	0	75	27.6355	8.14362	A_tiles_P10961:26	MNNAANTGTTNESNVSDAPRIEPLPSLNDDDIEKILQPNDIFTTDRTDASTTSSTAIEDIINPSLDPQSAASPVP
HSF1	P10961	602	660	5.65362	4.2503	A_tiles_P10961:611	RFTMLSDDDLKKDSHTNDNKHNESDLFWDNVHRNIDEQDARLQNLENMVHILSPGYPN
RAP1	P11938	619	681	63.1501	10.1713	A_tiles_P11938:632	AAAAAAAASNSYAIPENELLDEDTMNFISSLKNDLSNISNSLPFEYPHEIAEAIRSDFSNED
PDR1	P12383	1032	1067	149.572	12.2869	A_tiles_P12383:1015	NFSATSFNLGTLDEFVNNGDLEDLYSILWSDVYPD
STE12	P13574	272	347	32.9155	8.57261	A_tiles_P13574:298	LIIEPNTLELNGLTEETPHDLPKNTAKGRDEEDFPLDYFPVSVEYPTEENAFDPFPPQAFTPAAPSMPISYDNVN
STE12	P13574	441	507	56.9682	9.91852	A_tiles_P13574:441	QLYSNNFQQSYPNGMVPGYYPKMPYNPMGGDPLLDQAFYGADDFFFPPEGCDNNMLYPQTATSWNV
HAP4	P14064	300	395	42.1635	9.18015	A_tiles_P14064:295	DLNEIKFFNDFEKLEFFNKYAKVNTNNDVNENNDLWNSYLQSMDDTTGKNSGNYQQVDNDDNMSLLNLPILEETVSSGQDDKVEPDEEDIWNYLP
HAP4	P14064	116	181	34.903	8.71646	A_tiles_P14064:128	NRKQASKEKRKIPRHIQTIDEKLINDSNYLAFLKFDDLENEKFHSSASSISSPSYSSPSFSSYRN
HAP4	P14064	424	485	36.0415	8.79522	A_tiles_P14064:424	ETYLFLQDQDESADSHHHDELGSEITLADNKFSYLPPTLEELMEEQDCNNGRSFKNFMFSN
HAP4	P14064	518	553	5.51926	4.19129	A_tiles_P14064:501	DLNDNNNDATATNELDQSSFIDDLDEDVDFLKVQV
MTF1	P14908	200	253	35.7851	8.77771	A_tiles_P14908:200	DTKLIAISDANELKGFDSQCIEEWDPILFSAAEIWPTKGKPIALVEMDPIDFD
MTF1	P14908	100	148	21.2263	7.49623	A_tiles_P14908:100	DPYDWSTYSNLIDEERIFVPEVQSSDHINDKFLTVANVTGEGSEGLIM
CUP2	P15315	172	224	67.216	10.3244	A_tiles_P15315:172	QSPSISMEPVSINETGSAYTTTNTALNDIDIPFSINELNELYKQVSSHNSHS
CUP2	P15315	104	164	11.4429	5.98025	A_tiles_P15315:111	CHRRANDEAAHVNGLGIADLDVLLGLNGRSSDVDMTTTLPSLKPPLQNGEIKADSIDNLD
TEC1	P18412	209	257	39.7166	9.03346	A_tiles_P18412:216	EKELLHLIEHGAEQTTENSNLFYDIFEEIIDSLPSVSDSGSLTPKNLY
TEC1	P18412	0	48	8.28925	5.18919	A_tiles_P18412:0	MSLKEDDFGKDNSRNIESYTGRIFDVYIQKDSYSQSALDDMFPEAVVS
GLN3	P18494	26	91	52.7483	9.72968	A_tiles_P18494:26	EPRQTGDSRSQSSGNTGENEEDIAFASGLNGGTFDSMLEALPDDLYFTDFVSPFTAAATTSVTTK
GLN3	P18494	91	167	51.1637	9.65485	A_tiles_P18494:102	TVKDTTPATNHMDDDIAMFDSLATTQPIDIAASNQQNGEIAQLWDFNVDQFNMTPSNSSGSATISAPNSFTSDIPQ
GLN3	P18494	707	729	15.4849	6.72244	A_tiles_P18494:677	STKGSSKESSAIADELDWLKFG
RDS2	P19541	106	162	33.499	8.61573	A_tiles_P19541:114	SSLVNDTTSLLLPQQPVFVSENVGSEFSSLNEFLSMLENPLLTQTSLSSSSASNVH
YAP1	P19880	467	529	48.5874	9.52808	A_tiles_P19880:467	ANLAFPDDNSTNIQLQPFSESQSQNKFDYDMFFRDSSKEGNNLFGEFLEDDDDDKKAANMSD
YAP1	P19880	401	467	23.7963	7.77664	A_tiles_P19880:415	GSTGNKNKKNNNNSDDVLPFISESPFDMNQVTNFFSPGSTGIGNNAASNTNPSLLQSSKEDIPFIN
YAP1	P19880	234	308	41.277	9.12801	A_tiles_P19880:247	DSLSNSNDVLNNTPNSSTSMDWLDNVIYTNRFVSGDDGSNSKTKNLDSNMFSNDFNFENQFDEQVSEFCSKMNQ
ACE2	P21192	13	87	103.442	11.3821	A_tiles_P21192:13	GFAKDTQDEEYVQHHDNVNPTIPPPDNYILNNENDDGLDNLLGMDYYNIDDLLTQELRDLDIPLVPSPKTGDGS
ACE2	P21192	312	369	11.6925	6.03318	A_tiles_P21192:307	YPNKSPESNGLNLFSSNSGYLRDSELLSFSPQNYNLNLDGLTYNDHNNTSDKNNNDK
DAL81	P21657	77	130	4.59917	3.74384	A_tiles_P21657:77	QQQQQQQQQQQQQQQQQSLDTLLHHYQSLLSKSDNAIAFDDNVSNSADHNGSN
DAL82	P21705	177	230	19.0535	7.23127	A_tiles_P21705:177	INKGTNRFSETVLPPQMAAEQSWSDSNMELEICLDYLHNELEVIKKRQEDFEC
BAS1	P22035	694	760	7.97863	5.09548	A_tiles_P22035:707	DQSEISRTTSRSDTPLRDEDGLDFWETLRSLATTNPNPPVEKSAENDGAKPQVVHQGIGSHTEDSS
BAS1	P22035	480	554	4.14455	3.48846	A_tiles_P22035:501	LMDSFPHMGRQLGNGLPGLNSNSDTFNPEYRTSLDNMDSDFLSRTPNYNAFSLEATSHNPADNANELGSQSNRE
AFT1	P22149	390	508	57.4128	9.93759	A_tiles_P22149:390	HSSTAFSGYIDDPFNLNEILPLPASDFKLNTVTNLNEIDFTNIFTKSPHPHSGSTHPRQVFDQLDDCSSILFSPLTTNTNNEFEGESDDFVHSPYLNSEADFSQILSSAPPVHHDPNE
CAD1	P24813	170	252	32.2005	8.51873	A_tiles_P24813:191	EKVMWNIGSWNAPSLTNSWDSPPGNRTGAVTIGDESINGSEMPDFSLDLVSNDRQTGLEALDYDIHNYFPQHSERLTAEKID
HCM1	P25364	184	240	16.9837	6.94912	A_tiles_P25364:179	PGAETKFFKGENRGYEFVKDSLQDIGKYFEIDSTLDELEQVESGEGNDDLPDEEER
PUT3	P25502	892	978	156.878	12.4039	A_tiles_P25502:913	ASLENSYQTTLTEKGSQVMEKNMDQLDSVHNLNDDDLQQLLEDLGNIDHSDEKLWKEITDQAMWLGNTMDPTAAAGSEIDFTDYLG
RDS1	P25611	779	831	171.168	12.6178	A_tiles_P25611:779	SFAIKANTAMSQNTAEEFFNISEEEALNQLLENNNFDAFWDLLGENLSDMPS
INO2	P26798	100	161	43.5501	9.25953	A_tiles_P26798:100	MGFDQALGLKLSPSSSGLLSTNESNAIEQFLDNLISQDMMSSNASMNSESHLHIRSPKKQH
INO2	P26798	0	60	14.535	6.56712	A_tiles_P26798:13	MQQATGNELLGILDLDNDIDFETAYQMLSSNFDDQMSAHIHENTFSATSPPLLTHELGII
CAM1	P29547	362	414	28.5357	8.22228	A_tiles_P29547:362	AFDVAPDWESYDYAKLDPTNDDDKEFINNMWAWDKPVSVNGEPKEIVDGKVL
MET4	P32389	77	169	92.358	11.104	A_tiles_P32389:103	TNLYDHAVTPEILLEQLAYVDNFIPSLDNEFSNVDWNVNTTHNNANNNGADTFSSINANPFDLDEQLAIELSAFADDSFIFPDEDKPSNNNN
FZF1	P32805	237	298	17.5489	7.02943	A_tiles_P32805:246	DPESYWSDNRCKHSDCQELSPFASVFDLIDHYDHTHAFIPETLVKYSYIHLYKPSVWDLFE
RGT1	P32862	1147	1169	20.5534	7.41719	A_tiles_P32862:1117	NVALENFVSIGWKLLDDSELGW
TYE7	P33122	38	103	26.5211	8.04263	A_tiles_P33122:50	VNKDSSSVLSASSSTWFEPLENIISSASSSSIGSPIEDQFISSNNEESALFPTDQFFSNPSSYSH
PDR3	P33200	927	975	24.8408	7.88204	A_tiles_P33200:923	KRQHSAPSQISANENNIYNLGTLEEFVSSGDLTDLYHTLWNDNTSYPF
PDR3	P33200	65	127	9.30544	5.47292	A_tiles_P33200:65	PSSHANVEASADVQHLDTAIKLDNQYYFKLMNDLIQTPVSPSATHAPDTSNNPTNDNNILFK
MSN2	P33748	0	74	27.3139	8.11491	A_tiles_P33748:0	MTVDHDFNSEDILFPIESMSSIQYVENNNPNNINNDVIPYSLDIKNTVLDSADLNDIQNQETSLNLGLPPLSFD
MSN2	P33748	233	291	40.9084	9.106	A_tiles_P33748:230	YSNSISNSNSNSTGNLNSSYFNSLNIDSMLDDYVSSDLLLNDDDDDTNLSRRRFSDVI
MSN2	P33748	345	393	18.7199	7.18793	A_tiles_P33748:332	NANADSNIAGNPKNNDATIDNELTQILNEYNMNFNDNLGTSTSGKNKS
MSN2	P33748	485	538	7.40483	4.91236	A_tiles_P33748:485	QFIKPSMILSDNASVIAKVATTGLSNDMPFLTEEGEQNANSTPNFDLSITQMN
MSN4	P33749	385	472	30.6906	8.4009	A_tiles_P33749:410	HDIESFANDSVMANPLSDSASFLSEENEDDAFGALNYNSLDATTMSAFDNNVDPFNILKSSPAQDQQFIKPSMMLSDNASAAAKLAT
MSN4	P33749	192	266	24.3483	7.83291	A_tiles_P33749:192	AEPSIYSNLFLDARLPNNANSTTGLNDNDYNLDDTNNDNTNSMQSILEDFVSSEEALKFMPDAGRDARRYSEVV
MSN4	P33749	133	192	5.71612	4.27727	A_tiles_P33749:141	DKIYSSVATPQALNDELKNLEQLEKVFSPMNPINDSHFNENIELSPHQHATSPKTNLLE
SEF1	P34228	1112	1147	133.733	12.0123	A_tiles_P34228:1095	NKLTDFFQQQSAGWIEGNSSNDDFFGWFDMNMEQG
MAC1	P35192	260	322	44.5754	9.31663	A_tiles_P35192:260	STQCSCEDESCPCVNCLIHRSEEELNSYIQQSGVPLTNIGEAQITDKMMDYLDDCKCTDKEC
MAC1	P35192	182	235	4.68904	3.79132	A_tiles_P35192:182	SNGKTNKAPSDDIFTPYGSLESTSAFNDILQENYNSSVPGAHDSSETLTPQST
YKL222C	P35995	644	704	147.572	12.2539	A_tiles_P35995:639	DEGPETENDATENSLTTILNDLEGPLEDFSENFIDDILGSPSAFFDTAISGWSNFEDFFS
OAF3	P36023	827	862	148.068	12.2621	A_tiles_P36023:810	LLQQPLAPALPVNDLIVSEFDVIEDIFDPVDFVSF
OAF3	P36023	90	143	4.75836	3.82732	A_tiles_P36023:90	QTRQDEDHWQRVRELENQSSLYYLPIHEETPFFIDLIPNGFYLETKRSADNLF
TBS1	P38114	891	935	16.726	6.91161	A_tiles_P38114:900	KMEVSFNIFNEITIQDLNFLQFSSIPKLWENKTLEPGEEYHHSN
RTG3	P38165	425	485	48.2509	9.51103	A_tiles_P38165:433	YDSVGNHNHAGTMESHPHTNIHEELKEFLSGDLIEAEDNAKLMFGDDNSNPADYLLEFGS
RTG3	P38165	140	206	23.4199	7.73753	A_tiles_P38165:153	DSPVDRAMNTPLQQQEGLKAELPHDFLFQHGTDDTMYNLTDDLSSSLSSSINSDMMTPNTYSSSFS
RTG3	P38165	81	140	19.2052	7.25073	A_tiles_P38165:89	QARSNSQTPTASTIYEEAESQSSYLDDMFRTSQGGRPVTQNSISSIGQGPLRSSYSMAY
RTG3	P38165	0	48	8.58785	5.27602	A_tiles_P38165:0	MMNNNESEAENQRLLDELMNQTKVLQETLDFSLVTPTPHHNDDYKIHG
STB5	P38699	707	742	18.5443	7.1648	A_tiles_P38699:690	VPNMDQLTRELFGASDSYQDILDENNVDVSWVDKL
STP2	P38704	488	540	28.8433	8.24858	A_tiles_P38704:488	TEEDAINQSKESNMISINEMLQKQMDFELLGENHLKETQDYLALYKKAYGIE
YAP3	P38749	0	111	6.63391	4.64262	A_tiles_P38749:50	MTPSNMDDNTSGFMKFINPQCQEEDCCIRNSLFQEDSKCIKQQPDLLSEQTAPFPILEDQCPALNLDRSNNDLLLQNNISFPKGSDLQAIQLTPISGDYSTYVMADNNNND
RSC30	P38781	147	209	9.86917	5.61723	A_tiles_P38781:156	VRSDSPDVPSMDQIREYNTRLQLVNAQSFDYTDNPYSFNVGINQDSAVFDLMTSPFTQEEVL
NDT80	P38830	591	626	4.84994	3.8741	A_tiles_P38830:574	ADRVYSKGVKLIASGTLPSGIFNREELFEEDSFYK
CAT8	P39113	1225	1291	65.3869	10.2567	A_tiles_P39113:1238	SNTSQGSILGSTKHGMDNCDFNDLGNFNNFMTNVNYSGVDYDYIVDASLGLAPLLVDTPDISNTNT
CAT8	P39113	1023	1119	30.4104	8.37839	A_tiles_P39113:1070	KNMSTSNLFPFSFSNTDLTALFTHPEGPNCTNTNNGNVDVCNRASTDATDANIENLSFLNMAPFLQTGNSNIGQNTIENKPMHMDAIFSLPSNLDL
FHL1	P39521	82	131	38.8805	8.98125	A_tiles_P39521:91	VTDDNGNLKLELPDNLDNADFSKLLEFDAKNDEALFNSNELLSHTMDPV
YJL206C	P39529	684	757	118.507	11.7157	A_tiles_P39529:692	EADLKFQNTNNESHTTTAAQEEYLDKLLAEFEEFDYSINRVLPDVIDFSALIGQDSSANNQIFSSEFSSDPTV
OAF1	P39720	1011	1046	91.4561	11.08	A_controls-mean_OAF1	LPNGFDRGQANNTPFPGYFGGLDLFDYDFLFGNDF
RPH1	P39956	133	228	7.12803	4.81889	A_tiles_P39956:141	KNFESSFNIDDFEQFRTEYTIDLSDFQNTERLKFLEEYYWKTLNFTTPMYGADTPGSIFPEGLNVWNVAKLPNILDHMETKVPGVNDSYLYAGLW
TOG1	P39961	745	793	79.2492	10.7284	A_tiles_P39961:741	KLSPSSTSVSVGMDFCSLENFVTAESLPDLLNLFWEDTEFGITKENLG
ASG1	P40467	916	963	22.7113	7.66215	A_tiles_P40467:911	IEDKEEMSPNIEIKNEQNMTDSNDILGVFDQLDAQLFGKYLPLNYPS
ASG1	P40467	710	810	6.6475	4.64764	A_tiles_P40467:757	KNSFSLAKSEESTNDYAMANYLNNTPISENPLNEAQQQDQVSQGTTNMSNERDPNNFLSIDIRLDNNGQSNILDATDDVFIRNDGDIPTNSAFDFSSSKS
CEP3	P40969	572	607	6.75108	4.68558	A_tiles_P40969:555	QESLLEEEDENNTEPSDFRTIVEEFQSEYNISDIL
LYS14	P40971	259	307	39.7348	9.03458	A_tiles_P40971:259	PLDEIESLEIPNLDLTTTMNGYDVNLLMQNLNDMVNMKLHDSYLLNEE
LYS14	P40971	0	36	6.15139	4.45734	A_tiles_P40971:0	MFESVNLDENSPEDRELAKVLSPPGSYLSPASLDSG
LYS14	P40971	508	557	19.0842	7.23522	A_tiles_P40971:504	TVFGGSLIDNNDLDAIFDPYDYQYVDSLKFLNIMTPLNEFNLLRGHKED
HAC1	P41546	173	237	67.5067	10.335	A_tiles_P41546:185	STTLPAVDNNNLFDAVASPLADPLCDDIAGNSLPFDNSIDLDNWRNPEAQSGLNSFELNDFFIT
AZF1	P41696	244	297	14.4756	6.55707	A_tiles_P41696:244	SNGTNNSGNMNTNADYESFFNTGTNNSNSNQNPYFLSSRNNSLKFNPEDFDFQ
GZF3	P42944	0	61	7.80732	5.04223	A_tiles_P42944:0	MASQATTLRGYNIRKRDNVFEPKSSENLNSLNQSEEEGHIGRWPPLGYEAVSAEQKSAVQL
GSM1	P42950	210	267	36.2937	8.81233	A_tiles_P42950:218	NKSDDDVDDETNIHFDSMWCNDEYMKLKDIVDISTPFLPNNSQIFSLQESEYPNPSA
GAT1	P43574	457	509	29.6737	8.31822	A_tiles_P43574:457	NLHNASTSSFNNEAFWKPLDSAIDHHSGDTNPNSNMNTTPNGNLSLDWLNLN
GAT1	P43574	102	226	34.8327	8.71152	A_tiles_P43574:102	DFSASPFASGVNAAGPGNNDLDDTDTDNQQFFLSDMNLNGSSVFENVFDDDDDDDDVETHSIVHSDLLNDMDSASQRASHNASGFPNFLDTSCSSSFDDHFIFTNNLPFLNNNSINNNHSHNSS
CHA4	P43634	595	647	112.683	11.592	A_tiles_P43634:595	ENSEDALHNSETMDLLGTLSHGNDFALEYNFDFTLLNEIDMLIGGNTNDGLS
SUM1	P46676	1009	1061	94.3049	11.1552	A_tiles_P46676:996	FPHNETLPALGQDGINEDNLNETIDNMLIFDFLDDGSENNQVKYSRIIPPDI
SIP4	P46954	673	726	21.3611	7.51177	A_tiles_P46954:673	SNFASKVNTQLNLLQHSSSNSNFLDASPYDFNKIFMNNFENYDYETDEGYAED
RSF2	P46974	567	620	32.3347	8.52894	A_tiles_P46974:567	LLEPSMEPNDKDSNIDPAAIDDKWLSEFINNSDPKSTFKINFNHFNDIGFIYS
RSF2	P46974	365	427	9.39048	5.49524	A_tiles_P46974:387	NFELVEDAPHQVGFSTPQMTAKQLMESVSELDLPPLTLDEPPQAIKFNLNLFNNDPSGQQQQ
RSF2	P46974	674	736	9.77727	5.59427	A_tiles_P46974:683	YSDPISHSSHKRRRDSVMMDYDLSNFFSSRQLDISKVLNGTEQNNSHVNDDVLTLSFPGETD
ZAP1	P47043	353	415	49.2717	9.5624	A_tiles_P47043:362	SLRKPTNTLQGTNHAYHEHILNTDMDLKILEDLCNISSLYEVPFGKHINHHDHNNAGNGCDG
ZAP1	P47043	599	656	35.6674	8.76962	A_tiles_P47043:607	LLKDHVSQDFKHPMEPLACNWEDCDFLGDDTCSIVNHINCQHGINFDIQFANPDSFL
ZAP1	P47043	82	156	5.80579	4.31547	A_tiles_P47043:103	AFASGASHDMGGDCHVNEKCKEYTDCQHFEFLNYHNNPSLTKYNDTATYNSNNHSFANNFHSVASDPTSPQQNS
TEA1	P47988	693	758	17.3134	6.99629	A_tiles_P47988:680	HIFYTQLYPAYDLPKKLQEDTELETEQENQMLNQVGNINYTHDFSLSHEIDDLIRELFGVGTPQK
RFX1	P48743	441	511	7.31256	4.8816	A_tiles_P48743:450	EANKLDSLPPAANNPTGTLSSDELTFTHDLIEKVFNCNDKLSDNYNTQILSNTEHPLLTSYKLDFPKIPA
STB4	P50104	913	948	69.8763	10.4196	A_tiles_P50104:896	GLPSDVLDTVSKIGNSPNVFDDDLFSNLLWFDQNF
PIP2	P52960	947	995	148.709	12.2727	A_controls-mean_PIP2	INNNDNVKLPSNFKNYYDPPMSSLDISMDVPDIFGSLDFFDYDLLFQN
PUL4	P53749	90	169	194.493	12.9313	A_tiles_P53749:116	HIYEKEAPKFDSDIDISRFGTNDAVIFNNDGWDTSLPIDFDFDEFNTETTDFDDFLKLLGDNSPSKEQKSLSYSPTATG
CRZ1	P53968	204	291	59.0389	10.0061	A_tiles_P53968:217	LYPQDLVSSPAMSHLTANNDDFDDLLSVASMNSNYLLPVNSHGYKHISNLDELDDLLSLTYSDNNLLSASNNSDFNNSNNGIINTAD
FAP1	P53971	912	964	19.0023	7.22467	A_tiles_P53971:912	ERDMELLVGHFDFMAKEAFLADSISLCSTEEELERRLDTPVIQEDSPVMDNN
STP1	Q00947	405	480	59.5976	10.0292	A_tiles_Q00947:427	SSSSESSAEVMFHGKQMKNFLIDINSFTNQQQQAQDNPSFLPLDIEQSSYDLSEDAMSYPIISTQSNRDCTQYDN
SKO1	Q02100	452	505	5.88593	4.3491	A_tiles_Q02100:452	YIKKIENDLQFYESEYDDLTQVIGKLCGIIPSSSSNSQFNVNVSTPSSSSPPS
TBF1	Q02457	305	354	13.594	6.40289	A_tiles_Q02457:305	DFDVNEFDPQVLFSTGTRTVEFMDDQNQPSSASAFLSTARPNHYSTHTP
RPN4	Q03465	142	204	55.6088	9.85926	A_tiles_Q03465:142	SDPYVPTRNTFNYDVKISNDFFDNGDNLYGNDEEVLFYEDNYNPKMQWSLQDNSAAINNEDA
WAR1	Q03631	895	943	114.338	11.6278	A_tiles_Q03631:891	NSADSTNIKPSPSSSVDNLNDYLTDINSLAWGVNSLNDEFWTDLFMND
ARO80	Q04052	858	949	164.103	12.5144	A_tiles_Q04052:858	DPFVEQNNDITTALLNNELFQGPSLSDEVTDWFGASEDIGLEFVEPWTELIEQRYMQCGDGDNNNFENLYNLFVNSNNINNDINNSRPITR
ARO80	Q04052	459	521	20.0715	7.35898	A_tiles_Q04052:468	ESNEDYLGNEKFYLNEILPDEESKLRWKRVFENSENDHDNEKNFLTDWEREFLNDEYVLYYS
URC2	Q04411	711	771	77.7501	10.6816	A_tiles_Q04411:706	KPATSPTNVGTLHENLSSSHFMIPDVDQFNSFEDFFQDFFDSLKPNSQKMFTSDKKTEQT
TDA9	Q04545	438	491	93.7972	11.142	A_tiles_Q04545:438	IDHTDIHAHHADAHDDSFIESEEWLSKFIMDSQIDNDLKLNINHFNDIGFNNL
TDA9	Q04545	258	324	39.4832	9.01899	A_tiles_Q04545:258	QESIPHQVGFSTPQLTAQQLIENAIESGVVDLETLDLPPFLSLDGLPPASSSAAVAASEQIDICPS
TDA9	Q04545	1151	1199	9.43667	5.50728	A_tiles_Q04545:1146	LSEREYKLQTFAEFLRVPDNGSLDIESLDSSLIENTLNSHDVTNQALD
YLR278C	Q05854	1305	1340	25.2419	7.92135	A_tiles_Q05854:1288	VTNADIRKKRSNWDNMMTSGPVEDFWTINDDYGFL
ECM22	Q05958	649	698	22.812	7.673	A_tiles_Q05958:645	DLGEAVINQSNHNNDNDNSNNGDGNNNNTISELVCFDESIADLYPVEID
ARR1	Q06596	152	205	68.5068	10.3711	A_tiles_Q06596:140	IGCTNLSNDIPGYSFLNDAMSEIHTFGDFNGELDSTFLEFSGTEIKEPNNFIT
RDR1	Q08904	510	545	36.2447	8.80902	A_tiles_Q08904:493	QQLEQATHQRSNLETTHLLDIDWDALLDPSDTLNF
AFT2	Q08957	363	415	60.7316	10.0755	A_tiles_Q08957:363	NAPTADTDIATNLGKERNENFGMLNYNYEALLHFNDEHFNELNSIDPALISK
AFT2	Q08957	263	321	23.0954	7.70329	A_tiles_Q08957:272	CVKIEKEDSLTNLNEIDFTNMFCNDNFIQNYNQGLMELLTEPTPGPSSSSCILPSTPT
UPC2	Q12151	890	912	4.88057	3.88954	A_tiles_Q12151:860	MMLDFLGGGLPSMTTTNFSDFS
YRR1	Q12172	757	809	65.8622	10.2745	A_tiles_Q12172:757	MLPSPGETKNHAKSQSEIIQMLTDEFWANYNSGWEELINQSEFSTLFDDYKD
HAL9	Q12180	964	1029	6.59539	4.62833	A_tiles_Q12180:964	TSLVYPIHSSDTGDTLSSGLETPENSNFNSDSGIKEDFEAFRALLPLGKLIYDRDYSFVNTFRDY
WTM2	Q12206	328	402	12.9321	6.28041	A_tiles_Q12206:349	LTHRQNGEEPIQNEIAKLFHSGGDSVVDILFSQTSATEFVTVGGTGNVYHWDMEYSFSRNDDDNEDEVRVAAPE
YLL054C	Q12244	777	842	108.571	11.5009	A_tiles_Q12244:790	SLDLEILEELEKLISAQEFSRNFTEDVDESLQSEIDLMNYDNEALNQLMAIDLDKLLGIFPNLSN
YRM1	Q12340	737	785	73.4869	10.5432	A_tiles_Q12340:733	SENASHNNETGPIETELAQTISNEFWTAYNLGWEELMSQPDYKYLFDT
YRM1	Q12340	184	241	21.2751	7.50186	A_tiles_Q12340:193	PLEKTGSDILQQVCNVLPSFEQSSKIITDFFNTELETNEVSEVLDKTKIINDFTSSF
HAA1	Q12753	658	693	35.5874	8.76411	A_tiles_Q12753:641	DLPDTSPMSSIQTASPPSQLLTDQGFADLDNFMSS
HAA1	Q12753	274	335	28.3667	8.2077	A_tiles_Q12753:282	NSRVGEVSVPLEEYIPSDIDGVGRVTDKSSLVYDWPFDESIERNFSTTATAATGESKFDIN
HAA1	Q12753	167	228	5.72827	4.28248	A_tiles_Q12753:167	GKISKDYHHVPSLASISSLQSSQSLDQNFSIPQSPPLSSMSFNFLTGNINETNQNHSNHQH

## Sheet: Overlap with known yeast ADs
protein	start	stop	name	source, PMID	source, DOI	overlapped in screen
P03069	88	100	GCN4	UniProt		TRUE
P03069	105	125	GCN4	UniProt		TRUE
P07248	75	172	ADR1	8943299	https://doi.org/10.1074/jbc.271.50.32359	FALSE
P07248	262	357	ADR1	8943299	https://doi.org/10.1074/jbc.271.50.32359	TRUE
P07248	419	462	ADR1	8943299	https://doi.org/10.1074/jbc.271.50.32359	TRUE
P07248	641	705	ADR1	8943299	https://doi.org/10.1074/jbc.271.50.32359	TRUE
P07269	22	52	PHO2	UniProt		FALSE
P07270	74	99	PHO4	UniProt		TRUE
P11938	629	695	RAP1	UniProt		TRUE
P15315	108	225	CUP2	UniProt		TRUE
P04386	840	881	GAL4	8670900, 26002116	https://doi.org/10.1002/j.1460-2075.1996.tb00769.x, https://doi.org/10.1016/j.pep.2015.05.009	TRUE
P04386	148	197	GAL4	3115591, 26002116	https://doi.org/10.1016/0092-8674(87)90015-8, https://doi.org/10.1016/j.pep.2015.05.009	TRUE
P14064	123	300	HAP4	UniProt		TRUE
P14064	358	476	HAP4	UniProt		TRUE
P12383	1028	1068	PDR1	18385733	https://doi.org/10.1038/nature06836	TRUE
P07270	74	99	PHO4	9742099	https://doi.org/10.1128/mcb.18.10.5818	TRUE
P11938	629	671	RAP1	28196871	https://dx.doi.org/10.1074%2Fjbc.M117.779181	TRUE
P19880	219	378	YAP1	10567555	https://dx.doi.org/10.1128%2Fmcb.19.12.8302	TRUE
P19880	429	537	YAP1	10567555	https://dx.doi.org/10.1128%2Fmcb.19.12.8302	TRUE
P18494	125	138	GLN3	9401021	https://dx.doi.org/10.1128%2Fjb.179.24.7644-7652.1997	TRUE
P33748	252	267	MSN2	22505609	https://doi.org/10.1242/jcs.096446	TRUE
P39720	1020	1047	OAF1	10428786, 17467953	https://doi.org/10.1074/jbc.274.32.22208, https://doi.org/10.1016/j.ygeno.2007.02.003	TRUE
P52960	970	996	PIP2	10428786	https://doi.org/10.1074/jbc.274.32.22208	TRUE
P26370	300	528	UGA3	21515579	https://dx.doi.org/10.1534%2Fgenetics.110.126003	FALSE
Q03833	331	450	GIS1	20022953	https://dx.doi.org/10.1074%2Fjbc.M109.073288	FALSE
Q03833	592	816	GIS1	20022953	https://dx.doi.org/10.1074%2Fjbc.M109.073288	FALSE
Q12151	582	913	UPC2	16055745	https://dx.doi.org/10.1128%2FMCB.25.16.7375-7385.2005	TRUE
Q05958	478	814	ECM22	16055745	https://dx.doi.org/10.1128%2FMCB.25.16.7375-7385.2005	TRUE
P33200	795	976	PDR3	8078477	https://doi.org/10.1007/BF00583901	TRUE
P33200	61	109	PDR3	8078477	https://doi.org/10.1007/BF00583901	TRUE
P40971	277	790	LYS14	7935367, 11952910	https://dx.doi.org/10.1128%2Fmcb.14.10.6411, https://doi.org/10.1046/j.1365-2958.2002.02854.x	TRUE
P08638	856	886	LEU3	8355711	https://doi.org/10.1128/mcb.13.9.5702	TRUE
P32862	319	380	RGT1	15489524	https://dx.doi.org/10.1534%2Fgenetics.104.034512	FALSE
P39678	139	244	MBP1	10082554	https://dx.doi.org/10.1128%2Fmcb.19.4.2880	FALSE
P22149	412	572	AFT1	11877447	https://doi.org/10.1074/jbc.m200949200	TRUE
P26798	0	28	INO2	12753200	https://doi.org/10.1046/j.1365-2958.2003.03501.x	TRUE
P26798	100	135	INO2	12753200	https://doi.org/10.1046/j.1365-2958.2003.03501.x	TRUE
P32389	94	144	MET4	7799928	https://doi.org/10.1128/mcb.15.1.208	TRUE
P11746	77	286	MCM1	1851120	https://doi.org/10.1101/gad.5.5.751	FALSE
P07261	67	367	GCR1	8508768	https://doi.org/10.1002/j.1460-2075.1993.tb05897.x	FALSE
P35192	259	280	MAC1	9159110, 10887177	https://doi-org.stanford.idm.oclc.org/10.1073/pnas.94.11.5550, https://doi.org/10.1074/jbc.m001552200	TRUE
P35192	314	334	MAC1	9159110, 10887177	https://doi-org.stanford.idm.oclc.org/10.1073/pnas.94.11.5550, https://doi.org/10.1074/jbc.m001552200	FALSE
P47043	331	402	ZAP1	16045625	https://doi-org.stanford.idm.oclc.org/10.1111/j.1365-2958.2005.04734.x	TRUE
P47043	610	642	ZAP1	10899124	https://doi-org.stanford.idm.oclc.org/10.1093/emboj/19.14.3704	TRUE
P18412	280	486	TEC1	20118212	https://dx.doi.org/10.1128%2FEC.00251-09	FALSE
Q03465	118	210	RPN4	19914394	https://doi.org/10.1016/j.biocel.2009.11.003	TRUE
P25502	889	979	PUT3	8846888	http://europepmc.org/article/MED/8846888	TRUE
P14164	603	662	ABF1	11756546, 9488444, 9336454	https://doi.org/10.1128/mcb.22.2.505-516.2002, https://dx-doi-org.stanford.idm.oclc.org/10.1128%2Fmcb.18.3.1296, https://dx-doi-org.stanford.idm.oclc.org/10.1093%2Fnar%2F25.21.4250	FALSE

## Sheet: Overlap with one-hybrid screen
TF hits in Titz et al., 2006	AD found in screen?
MSN2	TRUE
URC2	TRUE
CUP2	TRUE
CHA4	TRUE
HAP4	TRUE
MET4	TRUE
OAF3	TRUE
ECM22	TRUE
HAA1	TRUE
CRZ1	TRUE
ACE2	TRUE
SWI5	TRUE
HSF1	TRUE
PUT3	TRUE
ADR1	TRUE
GLN3	TRUE
UPC2	TRUE
PHO4	TRUE
RLM1	FALSE
ACA1	FALSE
RTG1	FALSE
