# Supplementary material for: Simple biochemical features underlie transcriptional activation domain diversity and dynamic, fuzzy binding to Mediator
Source: eLife journal article supplement (doi:10.7554/elife.68068), 2021-04-27
Supplement: supp [file elife-68068-supp-v2.zip › elife_poa_e68068_Figure_3_source_data_1.xlsx]

## Sheet: Predicted ADs in human TFs
High-strength predicted human ADs								Medium-strength predicted human ADs
protein ID	start	stop	max predicted Z score	mean predicted Z score	protein	description		protein ID	start	stop	max predicted Z score	mean predicted Z score	protein	description
Q6P9G9	155	235	6.80455	6.4238	ZNF449	Zinc finger protein 449		Q9UK11	83	144	4.48877	4.30796	ZNF223	Zinc finger protein 223
Q04206	418	502	8.22452	7.5484	RELA	Transcription factor p65		Q99676	0	62	5.46528	5.02163	ZNF184	Zinc finger protein 184
Q9Y2G1	0	62	7.63942	6.9834	MYRF	Myelin regulatory factor		Q12800	0	68	5.72423	5.11026	TFCP2	Alpha-globin transcription factor CP2
P43354	13	77	6.9843	6.58685	NR4A2	Nuclear receptor subfamily 4 group A member 2		P17947	0	80	5.42759	4.70011	SPI1	Transcription factor PU.1
Q9ULD5	278	338	6.51514	6.24288	ZNF777	Zinc finger protein 777		Q96KN3	78	141	6.08388	5.33919	PKNOX2	Homeobox protein PKNOX2
Q06945	380	474	9.77653	8.81155	SOX4	Transcription factor SOX-4		Q08AG5	0	58	4.83105	4.57087	ZNF844	Zinc finger protein 844
Q9NV72	118	181	7.08911	6.66931	ZNF701	Zinc finger protein 701		Q9BYN7	0	59	5.85927	5.14979	ZNF341	Zinc finger protein 341
Q96NZ1	381	494	10.4084	9.0449	FOXN4	Forkhead box protein N4		Q5JUK2	119	177	4.14731	4.09789	SOHLH1	Spermatogenesis- and oogenesis-specific basic helix-loop-helix-containing protein 1
Q09472	0	87	8.20336	7.35659	EP300	Histone acetyltransferase p300		Q8IWI9	2751	2827	5.69931	4.95675	MGA	MAX gene-associated protein
Q09472	1470	1531	6.33908	6.20391	EP300	Histone acetyltransferase p300		Q9NPC7	188	254	4.8361	4.45315	MYNN	Myoneurin
Q14592	122	185	7.16901	6.62403	ZNF460	Zinc finger protein 460		Q9UMS5	333	399	5.44748	4.84068	PHTF1	Putative homeodomain transcription factor 1
Q15596	1043	1130	7.35773	7.01501	NCOA2	Nuclear receptor coactivator 2		Q09472	1069	1127	4.36626	4.23784	EP300	Histone acetyltransferase p300
A6NKF2	71	132	7.05046	6.68279	ARID3C	AT-rich interactive domain-containing protein 3C		P10072	223	289	5.42016	4.82201	HKR1	Krueppel-related zinc finger protein 1
P36956	0	81	10.2623	9.01105	SREBF1	Sterol regulatory element-binding protein 1		Q14592	57	117	4.21273	4.13081	ZNF460	Zinc finger protein 460
Q96JG9	2860	2955	7.77954	7.2324	ZNF469	Zinc finger protein 469		O60281	1218	1313	5.58369	5.04275	ZNF292	Zinc finger protein 292
Q96JG9	3000	3074	6.64991	6.27126	ZNF469	Zinc finger protein 469		Q15596	11	70	4.6628	4.4563	NCOA2	Nuclear receptor coactivator 2
P42226	757	822	7.34966	6.84349	STAT6	Signal transducer and activator of transcription 6		Q15596	780	860	6.00694	5.31924	NCOA2	Nuclear receptor coactivator 2
Q9NPG3	261	362	9.03826	7.96872	UBN1	Ubinuclein-1		Q9UGL1	848	912	5.77631	5.02846	KDM5B	Lysine-specific demethylase 5B
O15353	491	586	9.27341	8.23447	FOXN1	Forkhead box protein N1		Q9UDV7	182	259	5.19145	4.63297	ZNF282	Zinc finger protein 282
Q12778	564	655	10.3339	8.98206	FOXO1	Forkhead box protein O1		Q9UDV7	325	395	5.18946	4.73501	ZNF282	Zinc finger protein 282
Q9UKD1	198	259	6.43831	6.31655	GMEB2	Glucocorticoid modulatory element-binding protein 2		P32519	0	70	5.79782	5.04739	ELF1	ETS-related transcription factor Elf-1
P49715	28	114	7.45134	6.90103	CEBPA	CCAAT/enhancer-binding protein alpha		Q96JG9	641	700	4.10564	4.07882	ZNF469	Zinc finger protein 469
O00716	388	465	11.0235	9.34039	E2F3	Transcription factor E2F3		Q96JG9	813	883	5.10101	4.67018	ZNF469	Zinc finger protein 469
Q86TJ2	41	100	6.37246	6.20465	TADA2B	Transcriptional adapter 2-beta		Q96JG9	1424	1503	5.02917	4.61328	ZNF469	Zinc finger protein 469
Q86TJ2	140	208	7.59259	7.02031	TADA2B	Transcriptional adapter 2-beta		Q9NPG3	119	184	5.73891	5.07395	UBN1	Ubinuclein-1
Q9Y2N7	441	524	8.86474	7.5462	HIF3A	Hypoxia-inducible factor 3-alpha		Q12778	329	387	4.42569	4.28476	FOXO1	Forkhead box protein O1
Q9Y4A8	225	317	8.19323	7.43845	NFE2L3	Nuclear factor erythroid 2-related factor 3		Q2M3X9	50	122	4.48591	4.21447	ZNF674	Zinc finger protein 674
Q9Y4A8	335	449	10.9289	9.25239	NFE2L3	Nuclear factor erythroid 2-related factor 3		P23771	0	69	4.66792	4.4192	GATA3	Trans-acting T-cell-specific transcription factor GATA-3
Q8WYP5	1549	1612	7.01105	6.67229	AHCTF1	Protein ELYS		Q8NFU7	368	429	4.25298	4.17179	TET1	Methylcytosine dioxygenase TET1
Q9UPW0	429	514	7.88606	7.30668	FOXJ3	Forkhead box protein J3		Q8NFU7	1950	2015	5.62036	4.96467	TET1	Methylcytosine dioxygenase TET1
Q99941	0	100	8.87469	7.60273	ATF6B	Cyclic AMP-dependent transcription factor ATF-6 beta		P15621	12	76	5.6791	4.92841	ZNF44	Zinc finger protein 44
Q3SY56	75	149	6.94935	6.55151	SP6	Transcription factor Sp6		P48742	256	327	5.70917	5.00024	LHX1	LIM/homeobox protein Lhx1
Q96BA8	0	107	11.8112	10.4472	CREB3L1	Cyclic AMP-responsive element-binding protein 3-like protein 1		O00716	238	296	4.46677	4.26572	E2F3	Transcription factor E2F3
Q5JVG2	63	133	7.69169	7.02956	ZNF484	Zinc finger protein 484		O75626	13	87	5.70435	5.14912	PRDM1	PR domain zinc finger protein 1
O14981	239	325	8.29862	7.20274	BTAF1	TATA-binding protein-associated factor 172		Q9NQX6	0	68	5.3845	4.97853	ZNF331	Zinc finger protein 331
O14981	1780	1849	6.78418	6.55641	BTAF1	TATA-binding protein-associated factor 172		Q13487	190	248	4.42505	4.30927	SNAPC2	snRNA-activating protein complex subunit 2
P46531	1508	1567	6.62618	6.3725	NOTCH1	Neurogenic locus notch homolog protein 1		Q8NHY6	66	126	5.51292	5.02547	ZFP28	Zinc finger protein 28 homolog
Q03933	310	428	10.7533	9.2487	HSF2	Heat shock factor protein 2		Q96BA8	396	463	4.98611	4.65987	CREB3L1	Cyclic AMP-responsive element-binding protein 3-like protein 1
Q5T6S3	395	457	6.88139	6.57788	PHF19	PHD finger protein 19		P35398	178	243	4.44419	4.27293	RORA	Nuclear receptor ROR-alpha
Q8N1W2	593	657	6.78136	6.48288	ZNF710	Zinc finger protein 710		P17032	94	160	4.81429	4.50823	ZNF37A	Zinc finger protein 37A
Q8WYA1	565	636	9.4424	8.09843	ARNTL2	Aryl hydrocarbon receptor nuclear translocator-like protein 2		O14981	150	209	4.32023	4.20623	BTAF1	TATA-binding protein-associated factor 172
P51826	1144	1205	6.15249	6.07943	AFF3	AF4/FMR2 family member 3		Q8NBB4	123	185	4.91557	4.53097	ZSCAN1	Zinc finger and SCAN domain-containing protein 1
Q15788	782	841	6.43635	6.32548	NCOA1	Nuclear receptor coactivator 1		P11161	13	77	4.35428	4.17468	EGR2	E3 SUMO-protein ligase EGR2
Q8N344	43	134	7.72239	7.0623	MIER2	Mesoderm induction early response protein 2		Q8TE12	297	382	5.5566	4.85867	LMX1A	LIM homeobox transcription factor 1-alpha
Q96ST3	105	166	6.34432	6.22155	SIN3A	Paired amphipathic helix protein Sin3a		Q6NX45	78	163	6.08658	4.96054	ZNF774	Zinc finger protein 774
Q15935	37	102	7.28797	6.86431	ZNF77	Zinc finger protein 77		Q03933	478	536	4.97782	4.55905	HSF2	Heat shock factor protein 2
P41161	12	98	8.63161	7.77434	ETV5	ETS translocation variant 5		O75444	63	138	4.6864	4.30397	MAF	Transcription factor Maf
Q03112	204	264	6.51681	6.25348	MECOM	MDS1 and EVI1 complex locus protein		Q8N1W2	22	94	5.27195	4.78879	ZNF710	Zinc finger protein 710
Q8N587	6	70	7.50836	6.92166	ZNF561	Zinc finger protein 561		Q7Z3I7	61	126	4.72798	4.44235	ZNF572	Zinc finger protein 572
Q15910	94	192	9.67204	8.41126	EZH2	Histone-lysine N-methyltransferase EZH2		O14978	177	250	5.48857	5.11073	ZNF263	Zinc finger protein 263
O60663	321	384	6.9173	6.53152	LMX1B	LIM homeobox transcription factor 1-beta		P51826	0	58	5.48778	4.79728	AFF3	AF4/FMR2 family member 3
Q16665	480	611	9.28587	7.8408	HIF1A	Hypoxia-inducible factor 1-alpha		Q01826	705	763	4.48797	4.22724	SATB1	DNA-binding protein SATB1
Q9Y5W3	5	63	6.15888	6.10427	KLF2	Krueppel-like factor 2		Q9NP71	326	384	4.48513	4.30153	MLXIPL	Carbohydrate-responsive element-binding protein
P17014	38	99	6.17408	6.10815	ZNF12	Zinc finger protein 12		Q8N344	186	245	4.52954	4.36721	MIER2	Mesoderm induction early response protein 2
Q7Z3K6	18	111	7.32863	6.93078	MIER3	Mesoderm induction early response protein 3		P56693	246	327	5.83543	5.25741	SOX10	Transcription factor SOX-10
Q7Z3K6	404	482	7.78971	7.02679	MIER3	Mesoderm induction early response protein 3		O15060	249	343	5.20564	4.4192	ZBTB39	Zinc finger and BTB domain-containing protein 39
Q68CJ9	0	98	9.19451	7.60758	CREB3L3	Cyclic AMP-responsive element-binding protein 3-like protein 3		Q9BW11	147	206	4.70758	4.41361	MXD3	Max dimerization protein 3
P04637	0	84	9.79322	8.50231	TP53	Cellular tumor antigen p53		Q8N108	17	91	5.06634	4.59754	MIER1	Mesoderm induction early response protein 1
P52630	691	787	10.4119	8.7082	STAT2	Signal transducer and activator of transcription 2		P41161	444	510	5.53964	5.06617	ETV5	ETS translocation variant 5
Q01094	356	437	10.9028	9.10545	E2F1	Transcription factor E2F1		Q04864	452	511	4.23298	4.13623	REL	Proto-oncogene c-Rel
O75820	2	67	6.67962	6.44555	ZNF189	Zinc finger protein 189		Q04864	560	619	4.3713	4.26406	REL	Proto-oncogene c-Rel
Q16534	36	132	9.8627	8.8055	HLF	Hepatic leukemia factor		Q96GC6	46	113	4.46227	4.28131	ZNF274	Neurotrophin receptor-interacting factor homolog
O75461	121	182	7.21099	6.71953	E2F6	Transcription factor E2F6		Q8IZQ8	699	758	4.25953	4.13299	MYOCD	Myocardin
Q9H2W2	172	232	7.08548	6.81131	MIXL1	Homeobox protein MIXL1		P51815	228	295	5.37721	4.84431	ZNF75D	Zinc finger protein 75D
P04150	170	268	9.89086	7.79441	NR3C1	Glucocorticoid receptor		Q9Y462	47	110	4.78785	4.43335	ZNF711	Zinc finger protein 711
Q9BX82	75	150	7.67849	6.76871	ZNF471	Zinc finger protein 471		Q6NUN9	168	243	5.04266	4.5775	ZNF746	Zinc finger protein 746
O94916	140	199	6.41272	6.25996	NFAT5	Nuclear factor of activated T-cells 5		O94900	8	85	5.61473	4.89279	TOX	Thymocyte selection-associated high mobility group box protein TOX
P08048	0	59	6.59797	6.24834	ZFY	Zinc finger Y-chromosomal protein		Q07352	216	278	4.54897	4.32963	ZFP36L1	mRNA decay activator protein ZFP36L1
Q9ULV5	364	451	8.35351	7.57555	HSF4	Heat shock factor protein 4		Q8N8J6	0	61	4.28297	4.17482	ZNF615	Zinc finger protein 615
Q494X3	0	62	6.50063	6.31441	ZNF404	Zinc finger protein 404		Q7Z3K6	156	231	5.82486	4.86379	MIER3	Mesoderm induction early response protein 3
Q9H0D2	41	109	6.90211	6.65589	ZNF541	Zinc finger protein 541		Q7Z353	563	627	5.32147	4.8636	HDX	Highly divergent homeobox
Q14202	919	979	6.63008	6.39183	ZMYM3	Zinc finger MYM-type protein 3		Q6NSW7	219	279	4.23004	4.14406	NANOGP8	Homeobox protein NANOGP8
Q14202	966	1040	6.77395	6.3906	ZMYM3	Zinc finger MYM-type protein 3		Q03111	490	549	4.75741	4.4314	MLLT1	Protein ENL
Q13469	0	80	7.86437	6.89425	NFATC2	Nuclear factor of activated T-cells, cytoplasmic 2		Q9UBX2	341	424	5.41194	5.08535	DUX4	Double homeobox protein 4
Q8IUX7	648	722	8.27261	7.61114	AEBP1	Adipocyte enhancer-binding protein 1		Q9GZU2	1069	1129	4.61168	4.37033	PEG3	Paternally-expressed gene 3 protein
Q8TE85	154	217	6.85709	6.58671	GRHL3	Grainyhead-like protein 3 homolog		Q14765	151	212	4.73888	4.46749	STAT4	Signal transducer and activator of transcription 4
Q8IZM8	292	355	6.87099	6.55621	ZNF654	Zinc finger protein 654		P17027	25	104	5.08347	4.62582	ZNF23	Zinc finger protein 23
P15172	0	80	7.41971	6.80083	MYOD1	Myoblast determination protein 1		Q99743	114	173	4.40332	4.27923	NPAS2	Neuronal PAS domain-containing protein 2
Q96PQ6	19	81	6.8648	6.46407	ZNF317	Zinc finger protein 317		Q12901	80	140	4.34936	4.25058	ZNF155	Zinc finger protein 155
P26358	834	893	6.86146	6.54623	DNMT1	DNA (cytosine-5)-methyltransferase 1		P09016	12	71	4.39563	4.23893	HOXD4	Homeobox protein Hox-D4
Q9P0U4	249	337	9.47278	7.89264	CXXC1	CXXC-type zinc finger protein 1		O75541	353	412	6.25632	5.46138	ZNF821	Zinc finger protein 821
Q7KZ85	176	258	7.31313	6.76745	SUPT6H	Transcription elongation factor SPT6		Q8TAQ2	200	266	6.12658	5.31809	SMARCC2	SWI/SNF complex subunit SMARCC2
Q7KZ85	1357	1416	6.7595	6.49379	SUPT6H	Transcription elongation factor SPT6		Q8TAQ2	595	661	5.861	5.06324	SMARCC2	SWI/SNF complex subunit SMARCC2
Q99967	194	270	9.50188	8.41306	CITED2	Cbp/p300-interacting transactivator 2		Q6IV72	0	66	6.07725	5.46313	ZNF425	Zinc finger protein 425
Q8TD17	134	196	6.39764	6.25229	ZNF398	Zinc finger protein 398		Q9NWS9	175	263	5.73796	4.97601	ZNF446	Zinc finger protein 446
Q15744	1	74	7.47823	6.95594	CEBPE	CCAAT/enhancer-binding protein epsilon		Q68CP9	199	274	5.78216	5.10428	ARID2	AT-rich interactive domain-containing protein 2
Q9UPT8	659	747	6.42508	6.21109	ZC3H4	Zinc finger CCCH domain-containing protein 4		P61129	568	631	4.74142	4.44511	ZC3H6	Zinc finger CCCH domain-containing protein 6
Q99543	165	258	8.86489	7.60015	DNAJC2	DnaJ homolog subfamily C member 2		Q9Y608	322	381	4.24713	4.13722	LRRFIP2	Leucine-rich repeat flightless-interacting protein 2
Q8N7U7	312	393	7.43731	7.02587	TPRX1	Tetra-peptide repeat homeobox protein 1		P06401	95	163	5.42445	4.83081	PGR	Progesterone receptor
Q9P0K8	393	459	6.85313	6.56467	FOXJ2	Forkhead box protein J2		Q8TF50	96	157	4.73113	4.42044	ZNF526	Zinc finger protein 526
Q13330	256	320	7.41955	6.98019	MTA1	Metastasis-associated protein MTA1		Q9BS31	0	80	6.05489	4.96979	ZNF649	Zinc finger protein 649
P10243	273	346	6.55598	6.39953	MYBL1	Myb-related protein A		Q9H2C1	256	322	5.48656	4.88124	LHX5	LIM/homeobox protein Lhx5
P17040	265	323	6.282	6.18448	ZSCAN20	Zinc finger and SCAN domain-containing protein 20		O60381	150	210	4.66732	4.39028	HBP1	HMG box-containing protein 1
O75478	135	210	9.84804	8.3184	TADA2A	Transcriptional adapter 2-alpha		O60381	220	295	5.01689	4.61833	HBP1	HMG box-containing protein 1
Q7RTS3	0	67	8.39921	7.59385	PTF1A	Pancreas transcription factor 1 subunit alpha		O60381	307	370	4.65057	4.50218	HBP1	HMG box-containing protein 1
Q08050	690	763	8.30188	7.74042	FOXM1	Forkhead box protein M1		Q9P0W2	140	205	4.93732	4.55956	HMG20B	SWI/SNF-related matrix-associated actin-dependent regulator of chromatin subfamily E member 1-related
P78545	98	190	8.50552	7.44972	ELF3	ETS-related transcription factor Elf-3		Q14202	0	61	5.48955	4.91992	ZMYM3	Zinc finger MYM-type protein 3
Q3KNS6	3	69	6.53589	6.26996	ZNF829	Zinc finger protein 829		Q8IUX7	7	85	5.77869	5.35783	AEBP1	Adipocyte enhancer-binding protein 1
P35713	275	342	7.52852	6.94787	SOX18	Transcription factor SOX-18		Q8IUX7	1052	1134	4.95476	4.47791	AEBP1	Adipocyte enhancer-binding protein 1
Q96IT1	188	288	8.8583	7.7117	ZNF496	Zinc finger protein 496		Q8TE85	11	77	6.08953	5.12375	GRHL3	Grainyhead-like protein 3 homolog
P51508	84	142	6.33745	6.21665	ZNF81	Zinc finger protein 81		O00327	564	626	5.33689	4.90734	ARNTL	Aryl hydrocarbon receptor nuclear translocator-like protein 1
Q9UDV6	136	203	7.39444	6.96277	ZNF212	Zinc finger protein 212		Q9UK10	81	139	4.07955	4.05724	ZNF225	Zinc finger protein 225
Q9UDV6	216	278	6.45413	6.24871	ZNF212	Zinc finger protein 212		Q96KC8	279	344	5.58951	4.95417	DNAJC1	DnaJ homolog subfamily C member 1
Q14209	360	437	11.2381	9.48041	E2F2	Transcription factor E2F2		P51692	708	771	4.83757	4.55915	STAT5B	Signal transducer and activator of transcription 5B
P41229	1362	1440	7.59956	6.88687	KDM5C	Lysine-specific demethylase 5C		Q8TCN5	262	326	4.9386	4.64322	ZNF507	Zinc finger protein 507
Q86UP3	2442	2513	7.39196	6.69631	ZFHX4	Zinc finger homeobox protein 4		Q8TCN5	320	386	5.53542	4.90056	ZNF507	Zinc finger protein 507
Q9NS37	67	151	7.55313	7.0447	CREBZF	CREB/ATF bZIP transcription factor		Q6V9R5	0	69	6.33142	5.62983	ZNF562	Zinc finger protein 562
O43474	57	151	7.98989	7.3942	KLF4	Krueppel-like factor 4		P26358	344	408	5.42211	4.88849	DNMT1	DNA (cytosine-5)-methyltransferase 1
Q9NRY4	976	1035	6.46894	6.26619	ARHGAP35	Rho GTPase-activating protein 35		P26358	417	476	4.42596	4.28028	DNMT1	DNA (cytosine-5)-methyltransferase 1
A8MYZ6	393	492	10.8175	9.54379	FOXO6	Forkhead box protein O6		P26358	1018	1081	4.40262	4.19445	DNMT1	DNA (cytosine-5)-methyltransferase 1
O15350	0	63	7.19474	6.89948	TP73	Tumor protein p73		P10242	353	420	4.61035	4.3858	MYB	Transcriptional activator Myb
Q99856	195	257	7.40319	6.92229	ARID3A	AT-rich interactive domain-containing protein 3A		P51816	758	824	4.40121	4.22375	AFF2	AF4/FMR2 family member 2
P35638	0	75	9.16539	8.29075	DDIT3	DNA damage-inducible transcript 3 protein		Q15776	185	252	4.58998	4.28179	ZKSCAN8	Zinc finger protein with KRAB and SCAN domains 8
O43524	566	673	11.2095	9.33107	FOXO3	Forkhead box protein O3		Q8NCP5	494	570	5.82172	5.25188	ZBTB44	Zinc finger and BTB domain-containing protein 44
Q9NZI5	199	268	7.38344	6.8189	GRHL1	Grainyhead-like protein 1 homolog		Q16587	7	69	4.80907	4.56439	ZNF74	Zinc finger protein 74
Q8IVW6	169	233	8.17974	7.28247	ARID3B	AT-rich interactive domain-containing protein 3B		Q32MZ4	151	231	5.52697	4.89424	LRRFIP1	Leucine-rich repeat flightless-interacting protein 1
Q86TJ5	10	69	6.70668	6.47475	ZNF554	Zinc finger protein 554		Q8N7M2	37	95	4.3474	4.24291	ZNF283	Zinc finger protein 283
P08235	429	507	7.21822	6.61395	NR3C2	Mineralocorticoid receptor		Q8N7M2	78	142	5.09744	4.73139	ZNF283	Zinc finger protein 283
Q5VZL5	18	101	7.48666	6.97117	ZMYM4	Zinc finger MYM-type protein 4		Q7KZ85	637	708	6.09971	5.17461	SUPT6H	Transcription elongation factor SPT6
P14652	279	356	9.46337	8.12786	HOXB2	Homeobox protein Hox-B2		Q7KZ85	1055	1129	6.02989	5.19649	SUPT6H	Transcription elongation factor SPT6
P43268	7	105	9.52071	8.35689	ETV4	ETS translocation variant 4		Q7KZ85	1164	1245	5.69925	4.92374	SUPT6H	Transcription elongation factor SPT6
Q9BT81	283	358	6.81878	6.53271	SOX7	Transcription factor SOX-7		Q6ZMS4	64	126	5.10168	4.7597	ZNF852	Zinc finger protein 852
Q06416	0	65	7.35372	6.99296	POU5F1B	Putative POU domain, class 5, transcription factor 1B		P17029	112	182	5.21306	4.85746	ZKSCAN1	Zinc finger protein with KRAB and SCAN domains 1
Q9BUY5	3	75	7.54183	6.74193	ZNF426	Zinc finger protein 426		P17029	189	250	5.05335	4.6771	ZKSCAN1	Zinc finger protein with KRAB and SCAN domains 1
Q00613	367	465	9.37417	8.05009	HSF1	Heat shock factor protein 1		Q15973	0	66	5.69859	5.32504	ZNF124	Zinc finger protein 124
Q00613	448	529	8.11309	7.42232	HSF1	Heat shock factor protein 1		Q92949	5	69	4.36186	4.23468	FOXJ1	Forkhead box protein J1
Q01201	438	496	6.37124	6.22838	RELB	Transcription factor RelB		A1YPR0	222	305	5.25379	4.65011	ZBTB7C	Zinc finger and BTB domain-containing protein 7C
Q15329	278	346	8.43175	7.44999	E2F5	Transcription factor E2F5		A1YPR0	282	341	4.24051	4.14832	ZBTB7C	Zinc finger and BTB domain-containing protein 7C
P61978	306	396	8.67643	7.96328	HNRNPK	Heterogeneous nuclear ribonucleoprotein K		Q9UPT8	429	498	5.51141	4.95629	ZC3H4	Zinc finger CCCH domain-containing protein 4
Q70SY1	0	77	7.7376	7.34764	CREB3L2	Cyclic AMP-responsive element-binding protein 3-like protein 2		A6NI15	0	63	5.66488	5.21752	MSGN1	Mesogenin-1
Q9NQX1	70	155	8.3613	7.64672	PRDM5	PR domain zinc finger protein 5		Q969W8	0	68	4.95137	4.60056	ZNF566	Zinc finger protein 566
P01106	0	63	7.28331	6.87108	MYC	Myc proto-oncogene protein		Q9P2J8	16	87	4.97758	4.63077	ZNF624	Zinc finger protein 624
P01106	65	141	7.69317	7.02542	MYC	Myc proto-oncogene protein		O75132	45	106	4.74349	4.40232	ZBED4	Zinc finger BED domain-containing protein 4
P50549	16	96	7.84023	7.14085	ETV1	ETS translocation variant 1		Q9NP62	362	434	6.00979	5.24123	GCM1	Chorion-specific transcription factor GCMa
Q2KHR2	676	756	7.58531	6.85277	RFX7	DNA-binding protein RFX7		Q05215	222	287	4.59569	4.35035	EGR4	Early growth response protein 4
Q2KHR2	732	828	8.94766	7.52531	RFX7	DNA-binding protein RFX7		Q16236	0	66	6.00866	4.92745	NFE2L2	Nuclear factor erythroid 2-related factor 2
Q2KHR2	1257	1361	8.08446	7.08015	RFX7	DNA-binding protein RFX7		Q13547	305	371	5.56643	4.9841	HDAC1	Histone deacetylase 1
Q15911	2524	2585	7.1264	6.66993	ZFHX3	Zinc finger homeobox protein 3		Q12766	414	473	4.35328	4.25807	HMGXB3	HMG domain-containing protein 3
P35869	517	620	9.51736	8.07806	AHR	Aryl hydrocarbon receptor		Q96NG8	71	138	4.54029	4.34785	ZNF582	Zinc finger protein 582
Q14494	125	223	9.38834	8.04616	NFE2L1	Endoplasmic reticulum membrane sensor NFE2L1		P06733	245	312	5.01805	4.62128	ENO1	Alpha-enolase
Q14494	261	359	8.02628	7.50575	NFE2L1	Endoplasmic reticulum membrane sensor NFE2L1		P46100	486	564	5.23359	4.82318	ATRX	Transcriptional regulator ATRX
Q14494	396	501	10.0851	9.04334	NFE2L1	Endoplasmic reticulum membrane sensor NFE2L1		P46100	2164	2223	4.61964	4.34025	ATRX	Transcriptional regulator ATRX
P51814	131	196	6.74485	6.42681	ZNF41	Zinc finger protein 41		Q6ISB3	14	77	5.55741	5.07628	GRHL2	Grainyhead-like protein 2 homolog
Q99814	480	569	7.91068	7.18546	EPAS1	Endothelial PAS domain-containing protein 1		P17040	645	714	5.25471	4.7835	ZSCAN20	Zinc finger and SCAN domain-containing protein 20
Q07869	0	75	8.95578	7.73024	PPARA	Peroxisome proliferator-activated receptor alpha		O75478	41	118	5.76485	5.30154	TADA2A	Transcriptional adapter 2-alpha
Q7L2R6	53	111	6.46896	6.31433	ZNF765	Zinc finger protein 765		Q9H582	217	288	5.67892	4.89709	ZNF644	Zinc finger protein 644
P19532	469	561	9.39943	8.12699	TFE3	Transcription factor E3		Q9H582	1104	1166	4.77494	4.53497	ZNF644	Zinc finger protein 644
P18850	0	113	11.9918	10.3698	ATF6	Cyclic AMP-dependent transcription factor ATF-6 alpha		Q9BRJ9	209	268	6.55819	5.56401	MESP1	Mesoderm posterior protein 1
Q14872	690	753	7.84351	7.29295	MTF1	Metal regulatory transcription factor 1		P17676	71	131	4.83344	4.52332	CEBPB	CCAAT/enhancer-binding protein beta
Q3T8J9	1751	1820	7.58101	7.05909	GON4L	GON-4-like protein		Q13033	289	356	5.97368	5.16786	STRN3	Striatin-3
Q9Y6Y1	724	816	9.01353	8.26062	CAMTA1	Calmodulin-binding transcription activator 1		Q13033	395	472	6.11742	5.3615	STRN3	Striatin-3
O15391	0	59	8.18348	7.41678	YY2	Transcription factor YY2		Q08050	547	607	4.66418	4.42662	FOXM1	Forkhead box protein M1
O15391	59	124	7.25028	6.73251	YY2	Transcription factor YY2		Q08050	642	701	4.24766	4.1792	FOXM1	Forkhead box protein M1
Q9H0E9	852	921	7.82435	7.02478	BRD8	Bromodomain-containing protein 8		P0CG31	142	202	4.81081	4.50271	ZNF286B	Putative zinc finger protein 286B
P35222	23	89	6.64806	6.42007	CTNNB1	Catenin beta-1		Q8NI51	134	192	4.38985	4.23895	CTCFL	Transcriptional repressor CTCFL
P35222	683	745	6.89497	6.52039	CTNNB1	Catenin beta-1		Q9Y6Q9	1029	1088	4.33252	4.23928	NCOA3	Nuclear receptor coactivator 3
P35222	719	781	7.21062	6.59507	CTNNB1	Catenin beta-1		Q5VIY5	55	113	4.13816	4.07943	ZNF468	Zinc finger protein 468
P01100	252	323	7.86944	7.19789	FOS	Proto-oncogene c-Fos		P32242	292	351	4.22136	4.11273	OTX1	Homeobox protein OTX1
Q9ULM2	22	83	6.56827	6.36335	ZNF490	Zinc finger protein 490		P12525	16	87	6.02211	5.12032	MYCLP1	Putative myc-like protein MYCLP1
A8MZ59	91	155	7.00351	6.71754	LEUTX	Leucine-twenty homeobox		Q9UQR1	31	91	4.11687	4.08767	ZNF148	Zinc finger protein 148
O95125	236	306	6.96005	6.57241	ZNF202	Zinc finger protein 202		Q7Z5J4	828	888	4.27943	4.17296	RAI1	Retinoic acid-induced protein 1
P49716	28	110	9.01279	8.04635	CEBPD	CCAAT/enhancer-binding protein delta		Q8WVM7	466	529	5.15166	4.69494	STAG1	Cohesin subunit SA-1
Q96LU7	0	78	8.93404	7.69997	MYRFL	Myelin regulatory factor-like protein		Q8N823	64	132	4.88989	4.55278	ZNF611	Zinc finger protein 611
Q10586	75	162	7.14032	6.6161	DBP	D site-binding protein		P13349	0	62	5.56744	5.01109	MYF5	Myogenic factor 5
Q9UBW7	967	1060	9.8178	8.1265	ZMYM2	Zinc finger MYM-type protein 2		Q86UP3	1052	1115	4.69706	4.4219	ZFHX4	Zinc finger homeobox protein 4
Q96PN7	1132	1200	8.25402	7.64909	TRERF1	Transcriptional-regulating factor 1		Q86UP3	1393	1459	5.06332	4.71827	ZFHX4	Zinc finger homeobox protein 4
O14948	25	84	6.42998	6.2998	TFEC	Transcription factor EC		Q9HBT7	125	184	4.46506	4.26584	ZNF287	Zinc finger protein 287
O14771	173	255	8.15517	7.07612	ZNF213	Zinc finger protein 213		Q8WW38	8	95	5.68307	5.08703	ZFPM2	Zinc finger protein ZFPM2
Q7Z3K3	1352	1410	7.08491	6.60672	POGZ	Pogo transposable element with ZNF domain		P0CJ88	341	424	5.41168	5.08511	DUX4L5	Double homeobox protein 4-like protein 5
Q9BVI0	919	988	9.42796	8.21436	PHF20	PHD finger protein 20		Q9NRY4	452	516	4.95082	4.55777	ARHGAP35	Rho GTPase-activating protein 35
Q96IR2	52	115	6.61956	6.34263	ZNF845	Zinc finger protein 845		Q68DY9	72	138	4.56491	4.37715	ZNF772	Zinc finger protein 772
Q14934	146	206	6.16601	6.07473	NFATC4	Nuclear factor of activated T-cells, cytoplasmic 4		P53805	7	74	5.66802	4.94318	RCAN1	Calcipressin-1
Q01892	9	67	6.16341	6.13501	SPIB	Transcription factor Spi-B		Q9P243	483	557	5.51798	4.87543	ZFAT	Zinc finger protein ZFAT
Q03164	2830	2890	6.46668	6.32531	KMT2A	Histone-lysine N-methyltransferase 2A		P48436	247	325	4.88599	4.53005	SOX9	Transcription factor SOX-9
Q03164	2874	2939	6.34144	6.23569	KMT2A	Histone-lysine N-methyltransferase 2A		Q9HCE3	0	63	5.94967	5.47227	ZNF532	Zinc finger protein 532
Q9Y2K1	459	524	7.11345	6.69054	ZBTB1	Zinc finger and BTB domain-containing protein 1		Q9UC06	0	76	6.06807	5.24889	ZNF70	Zinc finger protein 70
Q9BY66	1342	1420	7.47565	6.70714	KDM5D	Lysine-specific demethylase 5D		P27540	727	789	6.03589	5.06488	ARNT	Aryl hydrocarbon receptor nuclear translocator
Q92922	231	290	6.60056	6.43818	SMARCC1	SWI/SNF complex subunit SMARCC1		Q8N9F8	56	117	4.5022	4.33191	ZNF454	Zinc finger protein 454
Q96MX3	31	89	6.14245	6.09522	ZNF48	Zinc finger protein 48		P0CJ89	341	424	5.41168	5.08511	DUX4L6	Double homeobox protein 4-like protein 6
Q99966	125	193	9.71118	8.47948	CITED1	Cbp/p300-interacting transactivator 1		Q5SXM2	237	298	4.26418	4.15647	SNAPC4	snRNA-activating protein complex subunit 4
Q12772	0	83	10.8481	9.58929	SREBF2	Sterol regulatory element-binding protein 2		Q9HBT8	141	200	4.56871	4.38327	ZNF286A	Zinc finger protein 286A
P58317	0	61	6.31819	6.16625	ZNF121	Zinc finger protein 121		Q13562	242	303	4.63024	4.46814	NEUROD1	Neurogenic differentiation factor 1
Q92800	105	195	8.09873	6.98094	EZH1	Histone-lysine N-methyltransferase EZH1		P98168	642	715	4.6563	4.37359	ZXDA	Zinc finger X-linked protein ZXDA
P98177	429	505	10.5383	8.87512	FOXO4	Forkhead box protein O4		A2RRD8	52	119	5.22167	4.77163	ZNF320	Zinc finger protein 320
Q06889	7	74	6.61786	6.46271	EGR3	Early growth response protein 3		Q9H3D4	24	113	4.92998	4.58512	TP63	Tumor protein 63
Q9UMN6	1949	2032	8.50611	7.79174	KMT2B	Histone-lysine N-methyltransferase 2B		P10070	1466	1536	5.90102	5.09421	GLI2	Zinc finger protein GLI2
Q96S65	406	483	7.44965	6.83295	CSRNP1	Cysteine/serine-rich nuclear protein 1		Q9H6I2	202	266	4.43701	4.28085	SOX17	Transcription factor SOX-17
Q96S65	519	589	8.08934	7.64674	CSRNP1	Cysteine/serine-rich nuclear protein 1		Q8NEP9	0	64	5.43809	4.89123	ZNF555	Zinc finger protein 555
O94842	4	84	6.54936	6.38179	TOX4	TOX high mobility group box family member 4		P15923	0	69	5.47362	4.9678	TCF3	Transcription factor E2-alpha
O43364	306	376	9.2824	8.59162	HOXA2	Homeobox protein Hox-A2		P17024	0	60	4.53587	4.38489	ZNF20	Zinc finger protein 20
P57073	236	317	7.6774	7.22276	SOX8	Transcription factor SOX-8		Q9C0F3	0	70	5.71838	5.19285	ZNF436	Zinc finger protein 436
Q9UIH9	31	107	7.50005	6.84731	KLF15	Krueppel-like factor 15		P10244	275	362	5.6241	4.65953	MYBL2	Myb-related protein B
Q9UIH9	95	180	7.78862	7.31626	KLF15	Krueppel-like factor 15		O43524	338	431	5.2847	4.93863	FOXO3	Forkhead box protein O3
O14686	2994	3088	8.46053	7.17958	KMT2D	Histone-lysine N-methyltransferase 2D		Q9NZI5	12	80	5.44838	4.73713	GRHL1	Grainyhead-like protein 1 homolog
O14686	3202	3260	6.52506	6.40631	KMT2D	Histone-lysine N-methyltransferase 2D		Q92610	0	60	4.87553	4.55668	ZNF592	Zinc finger protein 592
P32314	42	104	6.50242	6.3092	FOXN2	Forkhead box protein N2		P19484	391	476	5.5574	4.85432	TFEB	Transcription factor EB
Q96MM3	40	106	7.3535	6.88653	ZFP42	Zinc finger protein 42 homolog		Q96N77	149	213	5.18478	4.66115	ZNF641	Zinc finger protein 641
O94776	231	299	7.535	6.8645	MTA2	Metastasis-associated protein MTA2		Q96N77	202	269	6.50952	5.38039	ZNF641	Zinc finger protein 641
Q13398	0	65	7.16218	6.58412	ZNF211	Zinc finger protein 211		Q49AA0	33	98	4.95182	4.64887	ZFP69	Zinc finger protein 69 homolog
O00321	37	132	9.32168	7.84125	ETV2	ETS translocation variant 2		Q9NZV7	134	199	5.21128	4.876	ZIM2	Zinc finger imprinted 2
O00409	8	73	7.35155	6.75466	FOXN3	Forkhead box protein N3		P29375	1424	1496	4.52095	4.375	KDM5A	Lysine-specific demethylase 5A
P19838	735	833	8.53318	7.266	NFKB1	Nuclear factor NF-kappa-B p105 subunit		Q9BT81	168	235	5.30079	4.80624	SOX7	Transcription factor SOX-7
P35716	347	441	9.30196	7.12212	SOX11	Transcription factor SOX-11		Q9HCX3	189	249	4.56935	4.30002	ZNF304	Zinc finger protein 304
Q8IZX4	450	541	6.88335	6.19223	TAF1L	Transcription initiation factor TFIID subunit 1-like		Q7Z591	28	93	4.8725	4.47668	AKNA	AT-hook-containing transcription factor
Q13129	462	542	6.81836	6.20918	RLF	Zinc finger protein Rlf		Q01201	21	79	4.15996	4.11406	RELB	Transcription factor RelB
Q9NP71	223	347	8.98845	7.32871	MLXIPL	Carbohydrate-responsive element-binding protein		O43309	92	153	4.75107	4.46478	ZSCAN12	Zinc finger and SCAN domain-containing protein 12
Q8IUM7	652	802	9.52306	8.28305	NPAS4	Neuronal PAS domain-containing protein 4		P40763	709	770	5.92536	5.37056	STAT3	Signal transducer and activator of transcription 3
P37231	0	88	6.98397	6.41172	PPARG	Peroxisome proliferator-activated receptor gamma		Q9UIE0	74	139	4.27416	4.1311	ZNF230	Zinc finger protein 230
Q8IZQ8	835	938	8.78299	7.38167	MYOCD	Myocardin		P63272	19	78	4.56094	4.3839	SUPT4H1	Transcription elongation factor SPT4
P18848	0	161	11.3915	8.52352	ATF4	Cyclic AMP-dependent transcription factor ATF-4		P10914	199	257	4.15563	4.10987	IRF1	Interferon regulatory factor 1
Q99607	3	121	7.59294	6.42992	ELF4	ETS-related transcription factor Elf-4		Q99081	0	68	4.86617	4.47613	TCF12	Transcription factor 12
Q8TEY5	0	109	7.60937	6.0789	CREB3L4	Cyclic AMP-responsive element-binding protein 3-like protein 4		O75717	0	66	5.33995	4.99917	WDHD1	WD repeat and HMG-box DNA-binding protein 1
P51816	0	92	8.84167	6.51175	AFF2	AF4/FMR2 family member 2		O75717	300	381	6.19348	4.97005	WDHD1	WD repeat and HMG-box DNA-binding protein 1
Q10587	51	143	10.1232	7.64619	TEF	Thyrotroph embryonic factor		Q9NR83	108	177	5.10031	4.63216	SLC2A4RG	SLC2A4 regulator
Q92949	266	421	9.11035	7.03478	FOXJ1	Forkhead box protein J1		O14627	58	119	4.46504	4.29171	CDX4	Homeobox protein CDX-4
Q16236	137	231	7.67802	6.40477	NFE2L2	Nuclear factor erythroid 2-related factor 2		Q8N393	6	67	4.30758	4.19773	ZNF786	Zinc finger protein 786
Q16236	207	331	9.32669	7.30673	NFE2L2	Nuclear factor erythroid 2-related factor 2		P15822	1804	1865	4.75954	4.49615	HIVEP1	Zinc finger protein 40
Q9P0K8	201	287	6.74903	6.03196	FOXJ2	Forkhead box protein J2		P51523	112	197	6.27601	5.15343	ZNF84	Zinc finger protein 84
Q9H582	872	954	6.73215	6.2774	ZNF644	Zinc finger protein 644		O15370	249	315	5.41803	4.62802	SOX12	Transcription factor SOX-12
P04198	0	126	8.62104	7.29246	MYCN	N-myc proto-oncogene protein		O95785	171	229	4.28106	4.1925	WIZ	Protein Wiz
Q8IUR6	0	167	9.80684	7.7784	CREBRF	CREB3 regulatory factor		O95785	643	713	4.62139	4.36349	WIZ	Protein Wiz
Q92908	67	157	6.75415	6.1935	GATA6	Transcription factor GATA-6		Q86Y25	78	145	6.0982	5.2457	ZNF354C	Zinc finger protein 354C
Q96MU6	8	89	6.60225	6.15819	ZNF778	Zinc finger protein 778		P42229	703	768	4.95671	4.69218	STAT5A	Signal transducer and activator of transcription 5A
Q16254	321	413	8.08111	6.04901	E2F4	Transcription factor E2F4		Q9H2S9	18	94	5.08957	4.71359	IKZF4	Zinc finger protein Eos
P19484	122	198	7.02158	6.24391	TFEB	Transcription factor EB		Q96RY5	507	598	4.776	4.3922	CRAMP1	Protein cramped-like
Q969S3	305	389	7.25063	6.49361	ZNF622	Zinc finger protein 622		Q15911	882	940	4.45933	4.29235	ZFHX3	Zinc finger homeobox protein 3
P21675	428	522	7.60862	6.61959	TAF1	Transcription initiation factor TFIID subunit 1		P15884	0	69	5.90772	5.233	TCF4	Transcription factor 4
P19532	230	313	6.93738	5.82391	TFE3	Transcription factor E3		P35869	641	703	4.61735	4.41736	AHR	Aryl hydrocarbon receptor
Q3T8J9	486	613	9.2363	6.42894	GON4L	GON-4-like protein		Q9NZI7	1	68	6.03254	5.17307	UBP1	Upstream-binding protein 1
O95997	77	169	8.42126	6.50132	PTTG1	Securin		P17022	198	285	6.05782	5.01353	ZNF18	Zinc finger protein 18
O75030	187	278	7.98368	6.85447	MITF	Microphthalmia-associated transcription factor		P21675	267	327	4.09356	4.05689	TAF1	Transcription initiation factor TFIID subunit 1
O14948	239	335	8.58842	7.37065	TFEC	Transcription factor EC		P21675	364	426	5.08415	4.67972	TAF1	Transcription initiation factor TFIID subunit 1
O43889	0	88	10.7228	7.66756	CREB3	Cyclic AMP-responsive element-binding protein 3		Q9HC44	361	432	5.93016	5.10087	GPBP1L1	Vasculin-like protein 1
Q13351	0	93	7.03558	6.17716	KLF1	Krueppel-like factor 1		Q9HBZ2	654	717	6.88708	5.57556	ARNT2	Aryl hydrocarbon receptor nuclear translocator 2
O94983	463	550	7.16649	5.89418	CAMTA2	Calmodulin-binding transcription activator 2		Q969G2	244	306	4.64026	4.37845	LHX4	LIM/homeobox protein Lhx4
Q9HAP2	226	364	10.0014	7.14175	MLXIP	MLX-interacting protein		O14709	260	327	5.38132	4.78412	ZNF197	Zinc finger protein 197
								O95238	16	102	5.51475	5.09616	SPDEF	SAM pointed domain-containing Ets transcription factor
								P17097	81	143	5.05949	4.61136	ZNF7	Zinc finger protein 7
								P19532	11	72	4.77638	4.50918	TFE3	Transcription factor E3
								Q14872	320	392	6.23495	5.2649	MTF1	Metal regulatory transcription factor 1
								Q3T8J9	57	115	4.40464	4.22163	GON4L	GON-4-like protein
								Q9Y6Y1	1453	1531	6.22612	5.26926	CAMTA1	Calmodulin-binding transcription activator 1
								P41182	473	533	4.27817	4.17665	BCL6	B-cell lymphoma 6 protein
								Q9UJW7	108	178	5.73918	5.04556	ZNF229	Zinc finger protein 229
								Q86T24	607	672	5.94933	5.06902	ZBTB33	Transcriptional regulator Kaiso
								Q9H0E9	366	466	5.91896	5.15652	BRD8	Bromodomain-containing protein 8
								Q8IXZ3	163	238	5.66919	4.7388	SP8	Transcription factor Sp8
								Q9BTC8	116	174	4.30869	4.18743	MTA3	Metastasis-associated protein MTA3
								Q9BTC8	234	303	6.23666	5.31498	MTA3	Metastasis-associated protein MTA3
								Q6ZN28	28	91	5.13341	4.73874	MACC1	Metastasis-associated in colon cancer protein 1
								Q6ZN28	118	181	5.39215	4.94637	MACC1	Metastasis-associated in colon cancer protein 1
								P55318	272	343	4.9536	4.62485	FOXA3	Hepatocyte nuclear factor 3-gamma
								O15156	269	331	4.37646	4.17359	ZBTB7B	Zinc finger and BTB domain-containing protein 7B
								P23769	0	69	5.56938	5.11706	GATA2	Endothelial transcription factor GATA-2
								P01100	0	59	4.85141	4.52785	FOS	Proto-oncogene c-Fos
								Q9Y222	111	170	4.62575	4.39843	DMTF1	Cyclin-D-binding Myb-like transcription factor 1
								Q9Y222	314	380	6.44364	5.49153	DMTF1	Cyclin-D-binding Myb-like transcription factor 1
								Q9Y222	673	746	4.90143	4.53692	DMTF1	Cyclin-D-binding Myb-like transcription factor 1
								Q6ZN30	773	831	4.43603	4.23629	BNC2	Zinc finger protein basonuclin-2
								Q15562	0	63	4.31525	4.17545	TEAD2	Transcriptional enhancer factor TEF-4
								Q5VVJ2	20	81	4.73863	4.43102	MYSM1	Histone H2A deubiquitinase MYSM1
								Q5VVJ2	344	403	4.57872	4.35012	MYSM1	Histone H2A deubiquitinase MYSM1
								Q96K83	30	93	4.44834	4.32472	ZNF521	Zinc finger protein 521
								O95600	29	99	5.85975	5.09165	KLF8	Krueppel-like factor 8
								Q9Y692	216	275	4.61566	4.45872	GMEB1	Glucocorticoid modulatory element-binding protein 1
								Q9Y692	293	351	4.21297	4.10845	GMEB1	Glucocorticoid modulatory element-binding protein 1
								O15015	960	1019	4.47257	4.36149	ZNF646	Zinc finger protein 646
								P50553	174	236	5.80168	4.93621	ASCL1	Achaete-scute homolog 1
								Q16514	39	98	4.68715	4.39262	TAF12	Transcription initiation factor TFIID subunit 12
								Q96LU7	486	544	4.16341	4.10455	MYRFL	Myelin regulatory factor-like protein
								Q8N0Y2	48	117	5.39985	4.78763	ZNF444	Zinc finger protein 444
								P17010	295	360	4.91062	4.58734	ZFX	Zinc finger X-chromosomal protein
								Q92670	181	251	5.69714	5.10127	ZNF75CP	Putative zinc finger protein 75C
								P08151	192	261	4.54627	4.35536	GLI1	Zinc finger protein GLI1
								P12524	0	66	5.61397	5.02049	MYCL	Protein L-Myc
								Q9UKL0	151	214	5.13341	4.74009	RCOR1	REST corepressor 1
								Q6R2W3	99	172	5.52922	4.88622	ZBED9	SCAN domain-containing protein 3
								Q6R2W3	164	228	5.00232	4.58728	ZBED9	SCAN domain-containing protein 3
								O75030	433	501	4.57582	4.38711	MITF	Microphthalmia-associated transcription factor
								Q16621	106	170	5.14372	4.66037	NFE2	Transcription factor NF-E2 45 kDa subunit
								Q8IXQ3	117	194	4.6755	4.5012	C9orf40	Uncharacterized protein C9orf40
								Q96RE9	32	90	4.22373	4.1345	ZNF300	Zinc finger protein 300
								Q68EA5	0	65	5.67626	5.07657	ZNF57	Zinc finger protein 57
								P10071	1046	1142	5.53886	5.00621	GLI3	Transcriptional activator GLI3
								P10071	1456	1537	5.72989	5.05812	GLI3	Transcriptional activator GLI3
								Q4G112	328	387	4.39642	4.27807	HSF5	Heat shock factor protein 5
								P98169	68	139	4.83118	4.45609	ZXDB	Zinc finger X-linked protein ZXDB
								P98169	646	719	4.67663	4.3908	ZXDB	Zinc finger X-linked protein ZXDB
								P98169	723	791	4.91386	4.54339	ZXDB	Zinc finger X-linked protein ZXDB
								Q9H9S0	217	279	4.3392	4.23221	NANOG	Homeobox protein NANOG
								Q6ZN06	51	116	4.94759	4.50019	ZNF813	Zinc finger protein 813
								Q96JL9	165	231	5.77911	5.1841	ZNF333	Zinc finger protein 333
								A6NHJ4	65	132	4.71414	4.45833	ZNF860	Zinc finger protein 860
								P13056	286	344	4.20081	4.13133	NR2C1	Nuclear receptor subfamily 2 group C member 1
								Q05516	61	119	4.62112	4.38222	ZBTB16	Zinc finger and BTB domain-containing protein 16
								Q9HAZ2	29	102	5.7802	5.10421	PRDM16	PR domain zinc finger protein 16
								Q96EB6	104	163	4.19442	4.12456	SIRT1	NAD-dependent protein deacetylase sirtuin-1
								P57071	265	335	6.01873	5.23325	PRDM15	PR domain zinc finger protein 15
								Q92922	618	677	4.56306	4.38137	SMARCC1	SWI/SNF complex subunit SMARCC1
								Q9Y4E5	826	886	5.06822	4.75172	ZNF451	E3 SUMO-protein ligase ZNF451
								Q12772	403	467	5.03519	4.65043	SREBF2	Sterol regulatory element-binding protein 2
								O96006	628	694	5.88756	5.33434	ZBED1	Zinc finger BED domain-containing protein 1
								Q8N3X6	63	129	5.61661	4.8499	LCORL	Ligand-dependent nuclear receptor corepressor-like protein
								P42224	688	750	4.79815	4.4711	STAT1	Signal transducer and activator of transcription 1-alpha/beta
								P98177	258	318	5.01959	4.65095	FOXO4	Forkhead box protein O4
								Q06889	139	212	5.64928	4.90245	EGR3	Early growth response protein 3
								O14896	176	236	4.48061	4.29571	IRF6	Interferon regulatory factor 6
								Q8N720	154	212	4.11241	4.06646	ZNF655	Zinc finger protein 655
								Q8NAP3	614	690	4.91735	4.49868	ZBTB38	Zinc finger and BTB domain-containing protein 38
								Q9BR39	0	58	4.23547	4.10576	JPH2	Junctophilin-2
								P0CJ85	341	424	5.41168	5.08511	DUX4L2	Double homeobox protein 4-like protein 2
								Q03701	876	940	4.30082	4.17974	CEBPZ	CCAAT/enhancer-binding protein zeta
								Q13148	165	226	5.1187	4.72124	TARDBP	TAR DNA-binding protein 43
								P17017	0	58	4.70288	4.44385	ZNF14	Zinc finger protein 14
								P0CJ86	341	424	5.41168	5.08511	DUX4L3	Double homeobox protein 4-like protein 3
								P0CJ90	341	424	5.41168	5.08511	DUX4L7	Double homeobox protein 4-like protein 7
								Q6NSZ9	207	269	4.31088	4.20897	ZSCAN25	Zinc finger and SCAN domain-containing protein 25
								Q9BWX5	132	193	4.33821	4.20254	GATA5	Transcription factor GATA-5
								O60315	926	987	4.85232	4.57649	ZEB2	Zinc finger E-box-binding homeobox 2
								P0CJ87	337	422	5.52642	5.1338	DUX4L4	Double homeobox protein 4-like protein 4
								Q99676	69	159	5.60466	4.20345	ZNF184	Zinc finger protein 184
								Q8N8Y5	20	106	5.31524	4.05435	ZFP41	Zinc finger protein 41 homolog
								O15353	122	206	4.82595	4.36646	FOXN1	Forkhead box protein N1
								Q12778	30	120	4.84431	3.77004	FOXO1	Forkhead box protein O1
								O43298	273	365	5.46581	4.38814	ZBTB43	Zinc finger and BTB domain-containing protein 43
								Q9UPW0	239	326	4.99894	4.48823	FOXJ3	Forkhead box protein J3
								Q15788	863	972	5.36489	4.07322	NCOA1	Nuclear receptor coactivator 1
								Q8N108	163	259	5.94483	4.18162	MIER1	Mesoderm induction early response protein 1
								Q96ST3	327	403	4.96687	4.14421	SIN3A	Paired amphipathic helix protein Sin3a
								Q8NDW4	52	121	4.46033	4.18214	ZNF248	Zinc finger protein 248
								Q96GC6	248	345	5.5178	4.80069	ZNF274	Neurotrophin receptor-interacting factor homolog
								P08048	274	357	5.35899	4.1594	ZFY	Zinc finger Y-chromosomal protein
								O60393	549	636	4.83273	3.63792	NOBOX	Homeobox protein NOBOX
								O60381	17	126	6.11219	4.65196	HBP1	HMG box-containing protein 1
								A6NJG6	148	248	5.71298	4.60286	ARGFX	Arginine-fifty homeobox
								Q8IZM8	72	162	5.19515	4.71134	ZNF654	Zinc finger protein 654
								Q8N859	65	152	5.37652	4.02023	ZNF713	Zinc finger protein 713
								Q05215	120	208	4.61618	3.71074	EGR4	Early growth response protein 4
								Q9Y2D1	108	180	4.56817	4.1882	ATF5	Cyclic AMP-dependent transcription factor ATF-5
								Q8IYH5	807	903	5.89472	4.79184	ZZZ3	ZZ-type zinc finger-containing protein 3
								Q9Y6Q9	761	848	4.63952	4.24773	NCOA3	Nuclear receptor coactivator 3
								Q8TAQ5	8	92	4.89834	4.00051	ZNF420	Zinc finger protein 420
								Q8WVM7	1167	1258	5.77792	4.65912	STAG1	Cohesin subunit SA-1
								Q96BR6	53	143	6.04317	4.37896	ZNF669	Zinc finger protein 669
								Q6SJ96	21	118	5.35568	4.21641	TBPL2	TATA box-binding protein-like protein 2
								O43151	1418	1522	5.90923	3.98453	TET3	Methylcytosine dioxygenase TET3
								Q53GI3	117	203	5.34519	4.30887	ZNF394	Zinc finger protein 394
								Q8N393	41	141	4.94629	3.8704	ZNF786	Zinc finger protein 786
								Q9Y5Q3	54	137	5.09603	4.24881	MAFB	Transcription factor MafB
								Q96RY5	1189	1269	4.73185	4.29461	CRAMP1	Protein cramped-like
								P61371	262	349	4.83954	4.3494	ISL1	Insulin gene enhancer protein ISL-1
								Q14872	36	114	4.23947	3.96294	MTF1	Metal regulatory transcription factor 1
								Q9UJW7	9	98	4.93332	4.19922	ZNF229	Zinc finger protein 229
								Q9Y4C1	973	1077	6.07157	4.48961	KDM3A	Lysine-specific demethylase 3A
								Q13029	517	605	5.31564	4.50648	PRDM2	PR domain zinc finger protein 2
								P17010	0	123	5.74217	5.13964	ZFX	Zinc finger X-chromosomal protein
								Q16621	0	74	4.36425	4.03141	NFE2	Transcription factor NF-E2 45 kDa subunit
								Q9BVI0	594	673	5.01497	4.26244	PHF20	PHD finger protein 20
								O15405	6	117	5.56639	4.40324	TOX3	TOX high mobility group box family member 3
								Q8TBC5	122	198	4.41995	3.73244	ZSCAN18	Zinc finger and SCAN domain-containing protein 18
								Q03701	812	895	5.19698	4.52933	CEBPZ	CCAAT/enhancer-binding protein zeta
								Q03701	943	1030	6.39673	4.48509	CEBPZ	CCAAT/enhancer-binding protein zeta
								Q2M1K9	51	136	4.80748	3.99911	ZNF423	Zinc finger protein 423
								Q96LX8	0	107	5.61767	3.92659	ZNF597	Zinc finger protein 597
								Q9Y2D1	15	104	5.56238	4.39751	ATF5	Cyclic AMP-dependent transcription factor ATF-5
								P22736	13	112	5.64062	4.39674	NR4A1	Nuclear receptor subfamily 4 group A member 1

## Sheet: Predicted ADs in virus proteins
High-strength predicted virus ADs							Medium-strength predicted virus ADs
protein ID	start	stop	max predicted Z score	mean predicted Z score	protein		protein ID	start	stop	max predicted Z score	mean predicted Z score	protein
P03071	49	140	10.0448	8.59408	LT_POVBK		P12977	744	809	4.8303	4.41229	EBNA3_EBVB9
Q69113	400	490	11.0435	8.63268	Q69113_HHV2		Q69113	59	120	4.98591	4.62995	Q69113_HHV2
F5HCV3	549	644	8.88117	7.56539	ORF50_HHV8P		P18272	652	728	6.12143	5.35102	NCAP_EBOZM
Q4VCQ1	455	525	8.86682	7.86149	Q4VCQ1_NIPAV		Q4VCQ1	601	662	4.3675	4.26021	Q4VCQ1_NIPAV
A6YGN7	50	128	7.87918	7.09421	A6YGN7_9POLY		Q6TVQ9	114	176	5.53918	4.94372	Q6TVQ9_ORFSA
A6YGN7	244	306	7.99168	7.26558	A6YGN7_9POLY		Q69567	393	452	4.14211	4.10422	IE1_HHV6U
Q69567	0	86	8.45366	7.70828	IE1_HHV6U		Q69567	483	570	5.9775	5.12524	IE1_HHV6U
Q2HR73	632	695	6.53974	6.31417	VIRF4_HHV8P		Q98214	230	288	5.13595	4.67147	Q98214_MCV1
P14353	233	300	6.61912	6.5325	BEL1_FOAMV		Q2HR73	301	359	4.23038	4.16159	VIRF4_HHV8P
F6KS47	555	618	7.48366	6.80375	F6KS47_9VIRU		A0A2Z2FMG9	651	728	6.11506	5.31426	A0A2Z2FMG9_9MONO
Q69513	571	661	9.36954	8.23576	Q69513_HHV7J		P09265	0	61	6.07531	5.3383	VP16_VZVD
P04296	1078	1140	6.84189	6.45	DNBI_HHV11		P09265	62	145	6.13702	5.5028	VP16_VZVD
P03070	43	131	9.44658	8.17833	LT_SV40		P32530	0	61	5.38761	4.91638	PHOSP_PI1HB
Q9DUN1	223	324	9.4862	8.12596	Q9DUN1_HHV8		P10407	0	60	4.74978	4.63552	E1A_ADE04
O56282	1065	1124	6.41788	6.24808	O56282_9BETA		Q9QSP3	43	105	4.91792	4.57834	PHOSP_ABLVB
Q9YLA0	0	88	8.88476	8.1217	Q9YLA0_ADE09		P11870	1058	1126	5.64393	4.99113	DNBI_SUHVF
P12978	405	487	8.85089	8.00733	EBNA2_EBVB9		P03238	39	107	5.73374	4.94392	E4RF5_ADE02
P06492	397	490	10.9548	8.68844	VP16_HHV11		Q87042	231	300	5.09638	4.78691	BEL1_SFVCP
P03520	62	120	6.27521	6.1819	PHOSP_VSIVA		P36384	1066	1161	6.08491	4.88997	DNBI_HHV2
P0C746	0	73	8.1794	7.566	HBZ_HTL1A		C7B276	445	507	4.29944	4.19367	C7B276_9MONO
Q2HR71	271	376	10.2839	8.94273	VIRF2_HHV8P		Q9PZT1	436	541	6.14972	5.03387	NS1_PAVHV
P03072	50	141	10.087	8.68281	LT_POVJC		Q785N4	1064	1122	4.30426	4.21307	Q785N4_HHV6Z
Q6QCQ2	0	68	7.70902	7.02475	Q6QCQ2_HHV3		P19893	42	101	4.49293	4.31091	VIE2_HCMVA
P09246	1068	1146	9.2625	7.66556	DNBI_VZVD		Q8JPY1	653	714	4.5771	4.37822	NCAP_EBORR
P03209	524	596	9.11622	7.85708	RTA_EBVB9		P03227	470	532	4.63648	4.39652	DNBI_EBVB9
Q5XX08	648	716	7.39383	6.72175	NCAP_EBOSU		Q64857	14	79	5.21376	4.7714	Q64857_ADE40
Q6XA69	16	106	8.49711	7.60785	Q6XA69_HHV6H		E5LC01	644	729	4.13023	4.05679	E5LC01_HHV8
Q6XA69	379	474	7.59703	7.00397	Q6XA69_HHV6H		Q9QJ16	185	247	4.35516	4.21177	IE2_HHV6Z
Q6XA69	622	684	6.16659	6.11172	Q6XA69_HHV6H		Q2HR71	1	61	4.51161	4.40824	VIRF2_HHV8P
Q805Y1	396	487	11.4618	9.34057	Q805Y1_CHV1		Q2HR71	170	251	5.3908	4.9696	VIRF2_HHV8P
O55778	454	521	8.29146	7.53262	PHOSP_HENDH		Q2HR71	406	490	5.99087	5.00897	VIRF2_HHV8P
D3IZK8	120	179	7.00474	6.6006	D3IZK8_9POXV		P0C569	44	105	4.88489	4.56819	PHOSP_MOKV
P03256	13	98	8.50158	7.05503	E1A_ADE07		Q6Q1R8	239	310	6.00923	5.38803	NCAP_CVHNL
Q8BB47	0	94	9.64914	8.72024	IE2_HHV6G		P52338	1064	1123	4.37191	4.23279	DNBI_HHV6U
P10541	0	85	10.6621	8.79212	E1A_ADE40		Q6QCJ5	67	127	4.31105	4.20253	Q6QCJ5_HHV3
A5HBG1	55	130	8.267	7.51094	LT_POVWU		Q6TVC7	24	92	5.8527	5.07175	Q6TVC7_9POXV
Q5Y0Q4	399	488	11.4392	9.0373	Q5Y0Q4_9ALPH		Q6TVC7	124	188	5.23897	4.88073	Q6TVC7_9POXV
P03259	0	155	10.4621	7.51186	E1A_ADE12		P29129	88	150	4.55616	4.34011	ICP0_SUHVF
P03255	0	90	7.53562	6.58273	E1A_ADE05		P27958	2213	2272	4.51519	4.36372	POLG_HCVH
Q805Z9	1105	1191	7.31333	6.37041	Q805Z9_CHV1		P06747	41	106	6.01669	5.27653	PHOSP_RABVP
Q805Y1	43	125	6.83422	5.57135	Q805Y1_CHV1		O55778	588	662	5.77467	5.0949	PHOSP_HENDH
							B8XCM7	651	727	5.68145	5.19566	B8XCM7_9MONO
							C7B7D5	94	173	5.26307	4.43372	C7B7D5_9PAPI
							Q5Y0Q4	37	123	5.29835	3.98817	Q5Y0Q4_9ALPH
							Q5Y0S3	1073	1196	6.12029	4.60054	Q5Y0S3_9ALPH

## Sheet: Core ADs, fixed length
protein	protein ID	AD start	AD stop	AD sequence	13aa core start	13aa core sequence	13aa core Z score	13aa core activation	20aa core start	20aa core sequence	20aa core Z score	20aa core activation
GCN4	P03069	63	142	NLDFDFALPQTATAPDAKTVLPIPELDDAVVESFFSSSTDSTPMFEYENLEDNSKEWTSLFDNDIPVTTDDVSLADKAI	118	EWTSLFDNDIPVT	3.64188	4.41197	106	MFEYENLEDNSKEWTSLFDN	5.94707	11.2892
GAL4	P04386	832	880	SKPLSPGWTDQTAYNAFGITTGMFNTTTMDDVYNYLFDDEDTPPNPKK	860	MDDVYNYLFDDED	6.11249	12.0766	851	TTGMFNTTTMDDVYNYLFDD	7.24529	19.1627
GAL4	P04386	146	199	SIDSAAHHDNSTIPLDFMPRDALHGFDWSEEDDMSDGLPFLKTDPNNNGFFGD	171	FDWSEEDDMSDGL	1.89001	2.16044	170	GFDWSEEDDMSDGLPFLKTD	4.22019	5.58466
ARG81	P05085	194	256	KGHVKTGILSANDGVPPTPNLLDYDWNNLNITGYEWISSELRDDALLSAVTLQGHHLGHTQP	215	LDYDWNNLNITGY	4.51172	6.28927	215	LDYDWNNLNITGYEWISSEL	7.87777	24.7976
ARG81	P05085	69	126	IPQNSPATTTNLSGSVDEPQYQRRNIDFVRYDEEYVYHEDMDDELTMLHTPPIEKIS	104	VYHEDMDDELTML	2.38331	2.64155	99	YDEEYVYHEDMDDELTMLHT	4.93858	7.48438
ADR1	P07248	402	455	TVAIDNNSNNNKVSDNQPDFVDFQELLDNDTLGNDLLETTAVLKEFELLHDDS	418	QPDFVDFQELLDN	4.61715	6.56539	420	DFVDFQELLDNDTLGNDLLE	7.58095	21.9721
ADR1	P07248	639	688	YLDLFKNNFLPHFPIIHPSLLDLDLDSLQRYTNEDGYDDAENAQLFDRL	654	IHPSLLDLDLDSL	3.9715	5.04636	656	PSLLDLDLDSLQRYTNEDGY	5.60256	9.81033
ADR1	P07248	250	321	PKDRVKFSTPELVPLDLKNPELDSSFDLNMNLDLNLNLDSNFNIALNRSDSSGSTMNLDYKLPESANNYTY	271	LDSSFDLNMNLDL	3.59364	4.32607	269	PELDSSFDLNMNLDLNLNLD	7.02492	17.5166
ADR1	P07248	324	377	SPTRAYVGANTNSKNASFNDADLLSSSYWIKAYNDHLFSVSESDETSPMNSEL	341	FNDADLLSSSYWI	3.81706	4.73851	339	ASFNDADLLSSSYWIKAYND	4.5839	6.47703
ADR1	P07248	479	545	HKLIYKNKEGTNDDMLISFGLDHPSNREDDLDKLCNMTRDVQAIFSQYLKGEESKRSLEDFLSTSN	488	GTNDDMLISFGLD	3.44931	4.07893	491	DDMLISFGLDHPSNREDDLD	3.65933	4.44347
ADR1	P07248	1192	1245	SFNDTSFLNMEDPIRNEFSFDNGDRAVTDLPRSAHFLSDTGLEGINFSGLNDS	1193	FNDTSFLNMEDPI	1.81128	2.09222	1193	FNDTSFLNMEDPIRNEFSFD	4.24053	5.63116
ADR1	P07248	0	49	MANVEKPNDCSGFPVVDLNSCFSNGFNNEKQEIEMETDDSPILLMSSSA	16	DLNSCFSNGFNNE	1.02433	1.51814	8	DCSGFPVVDLNSCFSNGFNN	1.66644	1.97228
PHO2	P07269	0	36	MMEEFSYDHDFNTHFATDLDYLQHDQQQQQQQQHDQ	9	DFNTHFATDLDYL	3.07712	3.50483	2	EEFSYDHDFNTHFATDLDYL	6.29307	12.9989
PHO2	P07269	428	481	PQQNIAPPFLNTNSSATDSNPNTNLEDSLFFDHDLLSSSITNTNNGQGSNNGR	451	NLEDSLFFDHDLL	5.85534	10.875	451	NLEDSLFFDHDLLSSSITNT	5.92229	11.1758
PHO2	P07269	143	196	IPSSQSRDIANDYDRGSTDNNLVTTTSTSSIFHDEDLTFFDRIPLNSNNNYYF	171	SSIFHDEDLTFFD	4.35714	5.90524	166	TTTSTSSIFHDEDLTFFDRI	4.96033	7.55103
PHO2	P07269	510	558	LAQEHLSNDADIVANPNDHLLSLPTDSELPNTPDFLKNTNELTDEHRW	526	NDHLLSLPTDSEL	0.450113	1.20136	526	NDHLLSLPTDSELPNTPDFL	1.49327	1.83788
PHO4	P07270	52	101	QENHNSSENGNENENEQDSLALDDLDRAFELVEGMDMDWMMPSHAHHSP	80	FELVEGMDMDWMM	6.3046	13.0602	73	LDDLDRAFELVEGMDMDWMM	8.53914	32.4695
PPR1	P07272	774	903	YDKKTNVLGFDDGTFDNKVFNRTNFEEKAPFDIPLDEFFTELEKHSNVSQFNTLDVSEGNQVINESASTNTSSALNCQSYTNNQDIMDILFQVTSGSVWDEFFVRSGNGNEGESSYDISKGKNSESGGI	804	FDIPLDEFFTELE	7.60806	22.2162	797	NFEEKAPFDIPLDEFFTELE	8.23896	28.7304
PPR1	P07272	322	375	ALASDQTGINSAFEIPITSAFSAHTEPKRENVTEKIDVCSSVDVPWYDTWETS	360	CSSVDVPWYDTWE	3.1911	3.67149	354	TEKIDVCSSVDVPWYDTWET	3.59578	4.32985
SWI5	P08153	0	117	MDTSNSWFDASKVQSLNFDLQTNSYYSNARGSDPSSYAIEGEYKTLATDDLGNILNLNYGETNEVIMNEINDLNLPLGPLSDEKSVKVSTFSELIGNDWQSMNFDLENNSREVTLNA	94	IGNDWQSMNFDLE	4.72368	6.85673	88	STFSELIGNDWQSMNFDLEN	6.60037	14.7333
LEU3	P08638	833	885	LLETYPIVQSNPVTTTIKESPNSIMAGWDNWESDMVWRDVDILMNEFAFNPK	857	MAGWDNWESDMVW	5.51904	9.48203	860	WDNWESDMVWRDVDILMNEF	7.06922	17.8357
HAP1	P0CE41	1397	1459	TLTSPQGSDLASNSATQYKPDLEDFLMQNSNFNGLMINPSSLVEVVGGYNDPNNLGRNDAVD	1417	DLEDFLMQNSNFN	3.40378	4.00394	1417	DLEDFLMQNSNFNGLMINPS	4.23402	5.61624
HSF1	P10961	0	75	MNNAANTGTTNESNVSDAPRIEPLPSLNDDDIEKILQPNDIFTTDRTDASTTSSTAIEDIINPSLDPQSAASPVP	29	DDIEKILQPNDIF	0.851901	1.41511	22	PLPSLNDDDIEKILQPNDIF	2.40953	2.66994
HSF1	P10961	602	660	RFTMLSDDDLKKDSHTNDNKHNESDLFWDNVHRNIDEQDARLQNLENMVHILSPGYPN	626	DLFWDNVHRNIDE	2.67889	2.97974	623	NESDLFWDNVHRNIDEQDAR	3.11151	3.55431
RAP1	P11938	619	681	AAAAAAAASNSYAIPENELLDEDTMNFISSLKNDLSNISNSLPFEYPHEIAEAIRSDFSNED	637	LLDEDTMNFISSL	3.704	4.52511	630	YAIPENELLDEDTMNFISSL	5.91477	11.1416
PDR1	P12383	1032	1067	NFSATSFNLGTLDEFVNNGDLEDLYSILWSDVYPD	1051	DLEDLYSILWSDV	7.04166	17.6365	1043	LDEFVNNGDLEDLYSILWSD	8.47105	31.5808
STE12	P13574	272	347	LIIEPNTLELNGLTEETPHDLPKNTAKGRDEEDFPLDYFPVSVEYPTEENAFDPFPPQAFTPAAPSMPISYDNVN	303	EDFPLDYFPVSVE	4.09825	5.3139	304	DFPLDYFPVSVEYPTEENAF	5.97232	11.406
STE12	P13574	441	507	QLYSNNFQQSYPNGMVPGYYPKMPYNPMGGDPLLDQAFYGADDFFFPPEGCDNNMLYPQTATSWNV	474	LDQAFYGADDFFF	4.97526	7.59711	467	PMGGDPLLDQAFYGADDFFF	6.5168	14.24
HAP4	P14064	300	395	DLNEIKFFNDFEKLEFFNKYAKVNTNNDVNENNDLWNSYLQSMDDTTGKNSGNYQQVDNDDNMSLLNLPILEETVSSGQDDKVEPDEEDIWNYLP	306	FFNDFEKLEFFNK	4.44465	6.11967	300	DLNEIKFFNDFEKLEFFNKY	5.56168	9.64824
HAP4	P14064	116	181	NRKQASKEKRKIPRHIQTIDEKLINDSNYLAFLKFDDLENEKFHSSASSISSPSYSSPSFSSYRN	141	DSNYLAFLKFDDL	4.22178	5.58829	135	DEKLINDSNYLAFLKFDDLE	7.05974	17.767
HAP4	P14064	424	485	ETYLFLQDQDESADSHHHDELGSEITLADNKFSYLPPTLEELMEEQDCNNGRSFKNFMFSN	455	FSYLPPTLEELME	3.5007	4.16526	455	FSYLPPTLEELMEEQDCNNG	4.90699	7.38865
HAP4	P14064	518	553	DLNDNNNDATATNELDQSSFIDDLDEDVDFLKVQV	536	SFIDDLDEDVDFL	3.45173	4.08296	529	TNELDQSSFIDDLDEDVDFL	4.83627	7.17872
MTF1	P14908	200	253	DTKLIAISDANELKGFDSQCIEEWDPILFSAAEIWPTKGKPIALVEMDPIDFD	220	IEEWDPILFSAAE	4.87942	7.30609	214	GFDSQCIEEWDPILFSAAEI	6.58755	14.6566
MTF1	P14908	100	148	DPYDWSTYSNLIDEERIFVPEVQSSDHINDKFLTVANVTGEGSEGLIM	102	YDWSTYSNLIDEE	3.17499	3.64746	100	DPYDWSTYSNLIDEERIFVP	4.24923	5.65116
CUP2	P15315	172	224	QSPSISMEPVSINETGSAYTTTNTALNDIDIPFSINELNELYKQVSSHNSHS	197	LNDIDIPFSINEL	3.90494	4.91129	194	NTALNDIDIPFSINELNELY	7.13714	18.3364
CUP2	P15315	104	164	CHRRANDEAAHVNGLGIADLDVLLGLNGRSSDVDMTTTLPSLKPPLQNGEIKADSIDNLD	119	GIADLDVLLGLNG	4.40015	6.00966	119	GIADLDVLLGLNGRSSDVDM	3.81855	4.74138
TEC1	P18412	209	257	EKELLHLIEHGAEQTTENSNLFYDIFEEIIDSLPSVSDSGSLTPKNLY	225	ENSNLFYDIFEEI	6.06469	11.8436	222	QTTENSNLFYDIFEEIIDSL	7.89786	25.0015
TEC1	P18412	0	48	MSLKEDDFGKDNSRNIESYTGRIFDVYIQKDSYSQSALDDMFPEAVVS	30	DSYSQSALDDMFP	1.50753	1.84859	22	IFDVYIQKDSYSQSALDDMF	3.83854	4.78017
GLN3	P18494	26	91	EPRQTGDSRSQSSGNTGENEEDIAFASGLNGGTFDSMLEALPDDLYFTDFVSPFTAAATTSVTTK	63	LEALPDDLYFTDF	5.72046	10.2933	56	GGTFDSMLEALPDDLYFTDF	8.03423	26.4303
GLN3	P18494	91	167	TVKDTTPATNHMDDDIAMFDSLATTQPIDIAASNQQNGEIAQLWDFNVDQFNMTPSNSSGSATISAPNSFTSDIPQ	129	EIAQLWDFNVDQF	4.73259	6.88168	124	NQQNGEIAQLWDFNVDQFNM	6.35278	13.3192
GLN3	P18494	707	729	STKGSSKESSAIADELDWLKFG	715	SSAIADELDWLKF	4.6706	6.70999	708	TKGSSKESSAIADELDWLKF	2.8027	3.13396
RDS2	P19541	106	162	SSLVNDTTSLLLPQQPVFVSENVGSEFSSLNEFLSMLENPLLTQTSLSSSSASNVH	131	EFSSLNEFLSMLE	4.98487	7.62693	126	ENVGSEFSSLNEFLSMLENP	6.20656	12.5486
YAP1	P19880	467	529	ANLAFPDDNSTNIQLQPFSESQSQNKFDYDMFFRDSSKEGNNLFGEFLEDDDDDKKAANMSD	493	FDYDMFFRDSSKE	3.49561	4.15664	493	FDYDMFFRDSSKEGNNLFGE	5.27611	8.58816
YAP1	P19880	401	467	GSTGNKNKKNNNNSDDVLPFISESPFDMNQVTNFFSPGSTGIGNNAASNTNPSLLQSSKEDIPFIN	415	DDVLPFISESPFD	3.03941	3.45138	415	DDVLPFISESPFDMNQVTNF	4.56012	6.41456
YAP1	P19880	234	308	DSLSNSNDVLNNTPNSSTSMDWLDNVIYTNRFVSGDDGSNSKTKNLDSNMFSNDFNFENQFDEQVSEFCSKMNQ	251	TSMDWLDNVIYTN	4.16099	5.45153	283	MFSNDFNFENQFDEQVSEFC	6.69599	15.3189
ACE2	P21192	13	87	GFAKDTQDEEYVQHHDNVNPTIPPPDNYILNNENDDGLDNLLGMDYYNIDDLLTQELRDLDIPLVPSPKTGDGS	54	LGMDYYNIDDLLT	5.86879	10.9348	46	NDDGLDNLLGMDYYNIDDLL	8.6445	33.8941
ACE2	P21192	312	369	YPNKSPESNGLNLFSSNSGYLRDSELLSFSPQNYNLNLDGLTYNDHNNTSDKNNNDK	344	NYNLNLDGLTYND	2.06821	2.32319	334	DSELLSFSPQNYNLNLDGLT	3.46613	4.10699
DAL81	P21657	77	130	QQQQQQQQQQQQQQQQQSLDTLLHHYQSLLSKSDNAIAFDDNVSNSADHNGSN	94	SLDTLLHHYQSLL	0.512778	1.23244	96	DTLLHHYQSLLSKSDNAIAF	0.747379	1.3561
DAL82	P21705	177	230	INKGTNRFSETVLPPQMAAEQSWSDSNMELEICLDYLHNELEVIKKRQEDFEC	201	DSNMELEICLDYL	3.43899	4.06181	199	WSDSNMELEICLDYLHNELE	6.29492	13.0087
BAS1	P22035	694	760	DQSEISRTTSRSDTPLRDEDGLDFWETLRSLATTNPNPPVEKSAENDGAKPQVVHQGIGSHTEDSS	709	LRDEDGLDFWETL	4.43413	6.0935	711	DEDGLDFWETLRSLATTNPN	4.74677	6.92158
BAS1	P22035	480	554	LMDSFPHMGRQLGNGLPGLNSNSDTFNPEYRTSLDNMDSDFLSRTPNYNAFSLEATSHNPADNANELGSQSNRE	509	YRTSLDNMDSDFL	1.14575	1.59516	503	DTFNPEYRTSLDNMDSDFLS	2.47118	2.73786
AFT1	P22149	390	508	HSSTAFSGYIDDPFNLNEILPLPASDFKLNTVTNLNEIDFTNIFTKSPHPHSGSTHPRQVFDQLDDCSSILFSPLTTNTNNEFEGESDDFVHSPYLNSEADFSQILSSAPPVHHDPNE	450	FDQLDDCSSILFS	4.04331	5.19623	393	TAFSGYIDDPFNLNEILPLP	5.43467	9.1615
CAD1	P24813	170	252	EKVMWNIGSWNAPSLTNSWDSPPGNRTGAVTIGDESINGSEMPDFSLDLVSNDRQTGLEALDYDIHNYFPQHSERLTAEKID	226	GLEALDYDIHNYF	2.90254	3.26412	200	TIGDESINGSEMPDFSLDLV	3.5048	4.17224
HCM1	P25364	184	240	PGAETKFFKGENRGYEFVKDSLQDIGKYFEIDSTLDELEQVESGEGNDDLPDEEER	211	YFEIDSTLDELEQ	2.86851	3.21916	203	DSLQDIGKYFEIDSTLDELE	4.66304	6.68936
PUT3	P25502	892	978	ASLENSYQTTLTEKGSQVMEKNMDQLDSVHNLNDDDLQQLLEDLGNIDHSDEKLWKEITDQAMWLGNTMDPTAAAGSEIDFTDYLG	926	DDLQQLLEDLGNI	5.19238	8.30003	919	SVHNLNDDDLQQLLEDLGNI	6.8142	16.075
RDS1	P25611	779	831	SFAIKANTAMSQNTAEEFFNISEEEALNQLLENNNFDAFWDLLGENLSDMPS	811	NNNFDAFWDLLGE	6.95474	17.0227	809	LENNNFDAFWDLLGENLSDM	8.29565	29.4019
INO2	P26798	100	161	MGFDQALGLKLSPSSSGLLSTNESNAIEQFLDNLISQDMMSSNASMNSESHLHIRSPKKQH	127	EQFLDNLISQDMM	4.21703	5.57748	120	TNESNAIEQFLDNLISQDMM	6.96961	17.1261
INO2	P26798	0	60	MQQATGNELLGILDLDNDIDFETAYQMLSSNFDDQMSAHIHENTFSATSPPLLTHELGII	8	LLGILDLDNDIDF	3.64227	4.41268	7	ELLGILDLDNDIDFETAYQM	5.32759	8.77028
CAM1	P29547	362	414	AFDVAPDWESYDYAKLDPTNDDDKEFINNMWAWDKPVSVNGEPKEIVDGKVL	383	DDKEFINNMWAWD	4.90822	7.39233	377	LDPTNDDDKEFINNMWAWDK	4.83554	7.17659
MET4	P32389	77	169	TNLYDHAVTPEILLEQLAYVDNFIPSLDNEFSNVDWNVNTTHNNANNNGADTFSSINANPFDLDEQLAIELSAFADDSFIFPDEDKPSNNNN	145	IELSAFADDSFIF	3.72763	4.56889	137	FDLDEQLAIELSAFADDSFI	7.64357	22.54
FZF1	P32805	237	298	DPESYWSDNRCKHSDCQELSPFASVFDLIDHYDHTHAFIPETLVKYSYIHLYKPSVWDLFE	254	ELSPFASVFDLID	3.33948	3.90037	250	SDCQELSPFASVFDLIDHYD	5.45854	9.25107
RGT1	P32862	1147	1169	NVALENFVSIGWKLLDDSELGW	1151	ENFVSIGWKLLDD	3.28796	3.81933	1147	NVALENFVSIGWKLLDDSEL	3.22303	3.71958
TYE7	P33122	38	103	VNKDSSSVLSASSSTWFEPLENIISSASSSSIGSPIEDQFISSNNEESALFPTDQFFSNPSSYSH	53	WFEPLENIISSAS	2.78557	3.11216	53	WFEPLENIISSASSSSIGSP	2.69276	2.99664
PDR3	P33200	927	975	KRQHSAPSQISANENNIYNLGTLEEFVSSGDLTDLYHTLWNDNTSYPF	957	DLTDLYHTLWNDN	3.71641	4.54805	949	LEEFVSSGDLTDLYHTLWND	6.61115	14.7982
PDR3	P33200	65	127	PSSHANVEASADVQHLDTAIKLDNQYYFKLMNDLIQTPVSPSATHAPDTSNNPTNDNNILFK	86	LDNQYYFKLMNDL	3.05832	3.47808	80	LDTAIKLDNQYYFKLMNDLI	2.88626	3.24253
MSN2	P33748	0	74	MTVDHDFNSEDILFPIESMSSIQYVENNNPNNINNDVIPYSLDIKNTVLDSADLNDIQNQETSLNLGLPPLSFD	5	DFNSEDILFPIES	3.70195	4.52133	4	HDFNSEDILFPIESMSSIQY	5.28752	8.6282
MSN2	P33748	233	291	YSNSISNSNSNSTGNLNSSYFNSLNIDSMLDDYVSSDLLLNDDDDDTNLSRRRFSDVI	262	LDDYVSSDLLLND	4.46643	6.17423	256	LNIDSMLDDYVSSDLLLNDD	6.60733	14.7752
MSN2	P33748	345	393	NANADSNIAGNPKNNDATIDNELTQILNEYNMNFNDNLGTSTSGKNKS	370	ILNEYNMNFNDNL	2.76479	3.08591	363	IDNELTQILNEYNMNFNDNL	6.14875	12.2564
MSN2	P33748	485	538	QFIKPSMILSDNASVIAKVATTGLSNDMPFLTEEGEQNANSTPNFDLSITQMN	507	GLSNDMPFLTEEG	1.34407	1.72945	512	MPFLTEEGEQNANSTPNFDL	1.2361	1.655
MSN4	P33749	385	472	HDIESFANDSVMANPLSDSASFLSEENEDDAFGALNYNSLDATTMSAFDNNVDPFNILKSSPAQDQQFIKPSMMLSDNASAAAKLAT	430	SAFDNNVDPFNIL	1.77945	2.06525	406	FLSEENEDDAFGALNYNSLD	3.47658	4.12452
MSN4	P33749	192	266	AEPSIYSNLFLDARLPNNANSTTGLNDNDYNLDDTNNDNTNSMQSILEDFVSSEEALKFMPDAGRDARRYSEVV	231	TNSMQSILEDFVS	2.23931	2.49098	234	MQSILEDFVSSEEALKFMPD	3.88123	4.86407
MSN4	P33749	133	192	DKIYSSVATPQALNDELKNLEQLEKVFSPMNPINDSHFNENIELSPHQHATSPKTNLLE	165	INDSHFNENIELS	0.622305	1.2887	158	VFSPMNPINDSHFNENIELS	1.61258	1.92946
SEF1	P34228	1112	1147	NKLTDFFQQQSAGWIEGNSSNDDFFGWFDMNMEQG	1132	NDDFFGWFDMNME	7.76608	23.694	1125	WIEGNSSNDDFFGWFDMNME	8.70319	34.7146
MAC1	P35192	260	322	STQCSCEDESCPCVNCLIHRSEEELNSYIQQSGVPLTNIGEAQITDKMMDYLDDCKCTDKEC	302	QITDKMMDYLDDC	1.1823	1.6191	295	LTNIGEAQITDKMMDYLDDC	2.38835	2.64698
MAC1	P35192	182	235	SNGKTNKAPSDDIFTPYGSLESTSAFNDILQENYNSSVPGAHDSSETLTPQST	205	SAFNDILQENYNS	1.13578	1.58869	192	DDIFTPYGSLESTSAFNDIL	3.53451	4.22307
YKL222C	P35995	644	704	DEGPETENDATENSLTTILNDLEGPLEDFSENFIDDILGSPSAFFDTAISGWSNFEDFFS	669	LEDFSENFIDDIL	6.30154	13.0439	662	LNDLEGPLEDFSENFIDDIL	7.76922	23.7244
OAF3	P36023	827	862	LLQQPLAPALPVNDLIVSEFDVIEDIFDPVDFVSF	846	FDVIEDIFDPVDF	5.66572	10.0661	840	DLIVSEFDVIEDIFDPVDFV	8.37026	30.3097
OAF3	P36023	90	143	QTRQDEDHWQRVRELENQSSLYYLPIHEETPFFIDLIPNGFYLETKRSADNLF	115	IHEETPFFIDLIP	2.45872	2.724	105	ENQSSLYYLPIHEETPFFID	3.53539	4.22459
TBS1	P38114	891	935	KMEVSFNIFNEITIQDLNFLQFSSIPKLWENKTLEPGEEYHHSN	900	NEITIQDLNFLQF	2.95685	3.33717	897	NIFNEITIQDLNFLQFSSIP	3.97381	5.05111
RTG3	P38165	425	485	YDSVGNHNHAGTMESHPHTNIHEELKEFLSGDLIEAEDNAKLMFGDDNSNPADYLLEFGS	447	EELKEFLSGDLIE	2.21661	2.46804	464	AKLMFGDDNSNPADYLLEFG	3.51204	4.18457
RTG3	P38165	140	206	DSPVDRAMNTPLQQQEGLKAELPHDFLFQHGTDDTMYNLTDDLSSSLSSSINSDMMTPNTYSSSFS	164	DFLFQHGTDDTMY	1.90195	2.17098	164	DFLFQHGTDDTMYNLTDDLS	4.70951	6.81724
RTG3	P38165	81	140	QARSNSQTPTASTIYEEAESQSSYLDDMFRTSQGGRPVTQNSISSIGQGPLRSSYSMAY	97	EAESQSSYLDDMF	2.84062	3.18277	90	TASTIYEEAESQSSYLDDMF	5.08544	7.94604
RTG3	P38165	0	48	MMNNNESEAENQRLLDELMNQTKVLQETLDFSLVTPTPHHNDDYKIHG	24	LQETLDFSLVTPT	1.17153	1.61201	13	LLDELMNQTKVLQETLDFSL	2.51149	2.78322
STB5	P38699	707	742	VPNMDQLTRELFGASDSYQDILDENNVDVSWVDKL	717	LFGASDSYQDILD	1.90164	2.1707	710	MDQLTRELFGASDSYQDILD	3.79928	4.70428
STP2	P38704	488	540	TEEDAINQSKESNMISINEMLQKQMDFELLGENHLKETQDYLALYKKAYGIE	512	MDFELLGENHLKE	1.86844	2.14153	512	MDFELLGENHLKETQDYLAL	4.02377	5.15502
YAP3	P38749	0	111	MTPSNMDDNTSGFMKFINPQCQEEDCCIRNSLFQEDSKCIKQQPDLLSEQTAPFPILEDQCPALNLDRSNNDLLLQNNISFPKGSDLQAIQLTPISGDYSTYVMADNNNND	53	FPILEDQCPALNL	1.02929	1.52121	44	DLLSEQTAPFPILEDQCPAL	1.70068	2
RSC30	P38781	147	209	VRSDSPDVPSMDQIREYNTRLQLVNAQSFDYTDNPYSFNVGINQDSAVFDLMTSPFTQEEVL	191	DSAVFDLMTSPFT	1.88198	2.15338	188	INQDSAVFDLMTSPFTQEEV	3.5458	4.24255
NDT80	P38830	591	626	ADRVYSKGVKLIASGTLPSGIFNREELFEEDSFYK	612	FNREELFEEDSFY	2.6181	2.90682	605	GTLPSGIFNREELFEEDSFY	3.71703	4.5492
CAT8	P39113	1225	1291	SNTSQGSILGSTKHGMDNCDFNDLGNFNNFMTNVNYSGVDYDYIVDASLGLAPLLVDTPDISNTNT	1263	VDYDYIVDASLGL	2.99078	3.38364	1251	FNNFMTNVNYSGVDYDYIVD	4.85309	7.22808
CAT8	P39113	1023	1119	KNMSTSNLFPFSFSNTDLTALFTHPEGPNCTNTNNGNVDVCNRASTDATDANIENLSFLNMAPFLQTGNSNIGQNTIENKPMHMDAIFSLPSNLDL	1029	NLFPFSFSNTDLT	1.69069	1.99188	1029	NLFPFSFSNTDLTALFTHPE	3.71063	4.53734
FHL1	P39521	82	131	VTDDNGNLKLELPDNLDNADFSKLLEFDAKNDEALFNSNELLSHTMDPV	97	LDNADFSKLLEFD	4.20258	5.54473	91	LELPDNLDNADFSKLLEFDA	5.6871	10.1543
YJL206C	P39529	684	757	EADLKFQNTNNESHTTTAAQEEYLDKLLAEFEEFDYSINRVLPDVIDFSALIGQDSSANNQIFSSEFSSDPTV	705	EYLDKLLAEFEEF	4.81114	7.10556	702	AQEEYLDKLLAEFEEFDYSI	7.57375	21.9076
OAF1	P39720	1011	1046	LPNGFDRGQANNTPFPGYFGGLDLFDYDFLFGNDF	1032	LDLFDYDFLFGND	7.56694	21.847	1025	FPGYFGGLDLFDYDFLFGND	8.30481	29.5119
RPH1	P39956	133	228	KNFESSFNIDDFEQFRTEYTIDLSDFQNTERLKFLEEYYWKTLNFTTPMYGADTPGSIFPEGLNVWNVAKLPNILDHMETKVPGVNDSYLYAGLW	135	FESSFNIDDFEQF	4.70546	6.806	139	FNIDDFEQFRTEYTIDLSDF	6.26861	12.87
TOG1	P39961	745	793	KLSPSSTSVSVGMDFCSLENFVTAESLPDLLNLFWEDTEFGITKENLG	772	PDLLNLFWEDTEF	6.62379	14.8747	768	AESLPDLLNLFWEDTEFGIT	7.15179	18.4462
ASG1	P40467	916	963	IEDKEEMSPNIEIKNEQNMTDSNDILGVFDQLDAQLFGKYLPLNYPS	941	LGVFDQLDAQLFG	3.21886	3.71326	934	MTDSNDILGVFDQLDAQLFG	6.22115	12.6235
ASG1	P40467	710	810	KNSFSLAKSEESTNDYAMANYLNNTPISENPLNEAQQQDQVSQGTTNMSNERDPNNFLSIDIRLDNNGQSNILDATDDVFIRNDGDIPTNSAFDFSSSKS	762	DPNNFLSIDIRLD	1.12494	1.58169	785	TDDVFIRNDGDIPTNSAFDF	1.11412	1.57473
CEP3	P40969	572	607	QESLLEEEDENNTEPSDFRTIVEEFQSEYNISDIL	593	VEEFQSEYNISDI	1.93359	2.19916	586	PSDFRTIVEEFQSEYNISDI	3.61981	4.37247
LYS14	P40971	259	307	PLDEIESLEIPNLDLTTTMNGYDVNLLMQNLNDMVNMKLHDSYLLNEE	260	LDEIESLEIPNLD	1.84327	2.11967	259	PLDEIESLEIPNLDLTTTMN	4.41578	6.04807
LYS14	P40971	0	36	MFESVNLDENSPEDRELAKVLSPPGSYLSPASLDSG	0	MFESVNLDENSPE	0.481096	1.21662	0	MFESVNLDENSPEDRELAKV	0.462999	1.20768
LYS14	P40971	508	557	TVFGGSLIDNNDLDAIFDPYDYQYVDSLKFLNIMTPLNEFNLLRGHKED	519	DLDAIFDPYDYQY	3.8385	4.78008	514	LIDNNDLDAIFDPYDYQYVD	5.69821	10.2003
HAC1	P41546	173	237	STTLPAVDNNNLFDAVASPLADPLCDDIAGNSLPFDNSIDLDNWRNPEAQSGLNSFELNDFFIT	204	SLPFDNSIDLDNW	3.65001	4.42663	197	CDDIAGNSLPFDNSIDLDNW	5.02282	7.74582
AZF1	P41696	244	297	SNGTNNSGNMNTNADYESFFNTGTNNSNSNQNPYFLSSRNNSLKFNPEDFDFQ	257	ADYESFFNTGTNN	1.56237	1.89038	258	DYESFFNTGTNNSNSNQNPY	1.80346	2.08556
GZF3	P42944	0	61	MASQATTLRGYNIRKRDNVFEPKSSENLNSLNQSEEEGHIGRWPPLGYEAVSAEQKSAVQL	42	WPPLGYEAVSAEQ	1.04631	1.5318	34	EEEGHIGRWPPLGYEAVSAE	2.21161	2.46302
GSM1	P42950	210	267	NKSDDDVDDETNIHFDSMWCNDEYMKLKDIVDISTPFLPNNSQIFSLQESEYPNPSA	222	IHFDSMWCNDEYM	3.91895	4.93942	215	DVDDETNIHFDSMWCNDEYM	5.22259	8.40285
GAT1	P43574	457	509	NLHNASTSSFNNEAFWKPLDSAIDHHSGDTNPNSNMNTTPNGNLSLDWLNLN	466	FNNEAFWKPLDSA	2.28947	2.54243	461	ASTSSFNNEAFWKPLDSAID	3.17171	3.64258
GAT1	P43574	102	226	DFSASPFASGVNAAGPGNNDLDDTDTDNQQFFLSDMNLNGSSVFENVFDDDDDDDDVETHSIVHSDLLNDMDSASQRASHNASGFPNFLDTSCSSSFDDHFIFTNNLPFLNNNSINNNHSHNSS	198	FDDHFIFTNNLPF	3.59494	4.32837	186	FPNFLDTSCSSSFDDHFIFT	5.66337	10.0565
CHA4	P43634	595	647	ENSEDALHNSETMDLLGTLSHGNDFALEYNFDFTLLNEIDMLIGGNTNDGLS	622	EYNFDFTLLNEID	5.96631	11.3781	617	NDFALEYNFDFTLLNEIDML	8.09964	27.1445
SUM1	P46676	1009	1061	FPHNETLPALGQDGINEDNLNETIDNMLIFDFLDDGSENNQVKYSRIIPPDI	1030	ETIDNMLIFDFLD	7.17533	18.624	1024	NEDNLNETIDNMLIFDFLDD	8.50571	32.03
SIP4	P46954	673	726	SNFASKVNTQLNLLQHSSSNSNFLDASPYDFNKIFMNNFENYDYETDEGYAED	706	IFMNNFENYDYET	2.49264	2.76192	697	DASPYDFNKIFMNNFENYDY	4.12929	5.38155
RSF2	P46974	567	620	LLEPSMEPNDKDSNIDPAAIDDKWLSEFINNSDPKSTFKINFNHFNDIGFIYS	586	IDDKWLSEFINNS	5.45579	9.24069	581	IDPAAIDDKWLSEFINNSDP	7.19365	18.7636
RSF2	P46974	365	427	NFELVEDAPHQVGFSTPQMTAKQLMESVSELDLPPLTLDEPPQAIKFNLNLFNNDPSGQQQQ	392	VSELDLPPLTLDE	2.16069	2.41243	388	LMESVSELDLPPLTLDEPPQ	3.39754	3.99378
RSF2	P46974	674	736	YSDPISHSSHKRRRDSVMMDYDLSNFFSSRQLDISKVLNGTEQNNSHVNDDVLTLSFPGETD	688	DSVMMDYDLSNFF	5.22155	8.39931	688	DSVMMDYDLSNFFSSRQLDI	5.41902	9.10326
ZAP1	P47043	353	415	SLRKPTNTLQGTNHAYHEHILNTDMDLKILEDLCNISSLYEVPFGKHINHHDHNNAGNGCDG	376	DMDLKILEDLCNI	4.4334	6.09168	369	HEHILNTDMDLKILEDLCNI	6.33332	13.2139
ZAP1	P47043	599	656	LLKDHVSQDFKHPMEPLACNWEDCDFLGDDTCSIVNHINCQHGINFDIQFANPDSFL	618	NWEDCDFLGDDTC	3.39825	3.99493	613	EPLACNWEDCDFLGDDTCSI	4.84895	7.2159
ZAP1	P47043	82	156	AFASGASHDMGGDCHVNEKCKEYTDCQHFEFLNYHNNPSLTKYNDTATYNSNNHSFANNFHSVASDPTSPQQNS	103	EYTDCQHFEFLNY	2.38452	2.64286	103	EYTDCQHFEFLNYHNNPSLT	2.59126	2.8752
TEA1	P47988	693	758	HIFYTQLYPAYDLPKKLQEDTELETEQENQMLNQVGNINYTHDFSLSHEIDDLIRELFGVGTPQK	741	EIDDLIRELFGVG	3.83575	4.77473	732	YTHDFSLSHEIDDLIRELFG	6.24341	12.7385
RFX1	P48743	441	511	EANKLDSLPPAANNPTGTLSSDELTFTHDLIEKVFNCNDKLSDNYNTQILSNTEHPLLTSYKLDFPKIPA	460	SSDELTFTHDLIE	1.57443	1.89969	460	SSDELTFTHDLIEKVFNCND	2.64688	2.94112
STB4	P50104	913	948	GLPSDVLDTVSKIGNSPNVFDDDLFSNLLWFDQNF	932	FDDDLFSNLLWFD	7.57751	21.9412	927	NSPNVFDDDLFSNLLWFDQN	8.10952	27.254
PIP2	P52960	947	995	INNNDNVKLPSNFKNYYDPPMSSLDISMDVPDIFGSLDFFDYDLLFQN	978	DIFGSLDFFDYDL	7.37734	20.2223	971	DISMDVPDIFGSLDFFDYDL	8.33524	29.8802
PUL4	P53749	90	169	HIYEKEAPKFDSDIDISRFGTNDAVIFNNDGWDTSLPIDFDFDEFNTETTDFDDFLKLLGDNSPSKEQKSLSYSPTATG	139	TDFDDFLKLLGDN	7.42258	20.5986	131	FDEFNTETTDFDDFLKLLGD	8.7896	35.9591
CRZ1	P53968	204	291	LYPQDLVSSPAMSHLTANNDDFDDLLSVASMNSNYLLPVNSHGYKHISNLDELDDLLSLTYSDNNLLSASNNSDFNNSNNGIINTAD	252	NLDELDDLLSLTY	6.23375	12.6884	250	ISNLDELDDLLSLTYSDNNL	7.21047	18.8927
FAP1	P53971	912	964	ERDMELLVGHFDFMAKEAFLADSISLCSTEEELERRLDTPVIQEDSPVMDNN	914	DMELLVGHFDFMA	2.5325	2.80716	914	DMELLVGHFDFMAKEAFLAD	3.29323	3.82754
STP1	Q00947	405	480	SSSSESSAEVMFHGKQMKNFLIDINSFTNQQQQAQDNPSFLPLDIEQSSYDLSEDAMSYPIISTQSNRDCTQYDN	444	FLPLDIEQSSYDL	3.70845	4.53332	440	DNPSFLPLDIEQSSYDLSED	6.51198	14.2121
SKO1	Q02100	452	505	YIKKIENDLQFYESEYDDLTQVIGKLCGIIPSSSSNSQFNVNVSTPSSSSPPS	459	DLQFYESEYDDLT	3.4561	4.09024	456	IENDLQFYESEYDDLTQVIG	5.10461	8.00837
TBF1	Q02457	305	354	DFDVNEFDPQVLFSTGTRTVEFMDDQNQPSSASAFLSTARPNHYSTHTP	305	DFDVNEFDPQVLF	2.9658	3.34936	305	DFDVNEFDPQVLFSTGTRTV	3.06261	3.48417
RPN4	Q03465	142	204	SDPYVPTRNTFNYDVKISNDFFDNGDNLYGNDEEVLFYEDNYNPKMQWSLQDNSAAINNEDA	169	LYGNDEEVLFYED	3.58607	4.31276	161	DFFDNGDNLYGNDEEVLFYE	7.13306	18.3059
WAR1	Q03631	895	943	NSADSTNIKPSPSSSVDNLNDYLTDINSLAWGVNSLNDEFWTDLFMND	928	NSLNDEFWTDLFM	6.77408	15.8143	919	DINSLAWGVNSLNDEFWTDL	8.12722	27.4513
ARO80	Q04052	858	949	DPFVEQNNDITTALLNNELFQGPSLSDEVTDWFGASEDIGLEFVEPWTELIEQRYMQCGDGDNNNFENLYNLFVNSNNINNDINNSRPITR	888	DWFGASEDIGLEF	5.79358	10.6047	888	DWFGASEDIGLEFVEPWTEL	8.40191	30.7033
ARO80	Q04052	459	521	ESNEDYLGNEKFYLNEILPDEESKLRWKRVFENSENDHDNEKNFLTDWEREFLNDEYVLYYS	502	FLTDWEREFLNDE	4.16508	5.46062	498	NEKNFLTDWEREFLNDEYVL	5.59049	9.76219
URC2	Q04411	711	771	KPATSPTNVGTLHENLSSSHFMIPDVDQFNSFEDFFQDFFDSLKPNSQKMFTSDKKTEQT	739	FNSFEDFFQDFFD	7.84039	24.4226	732	MIPDVDQFNSFEDFFQDFFD	8.60178	33.3091
TDA9	Q04545	438	491	IDHTDIHAHHADAHDDSFIESEEWLSKFIMDSQIDNDLKLNINHFNDIGFNNL	456	IESEEWLSKFIMD	6.25955	12.8226	453	DSFIESEEWLSKFIMDSQID	8.21289	28.4268
TDA9	Q04545	258	324	QESIPHQVGFSTPQLTAQQLIENAIESGVVDLETLDLPPFLSLDGLPPASSSAAVAASEQIDICPS	289	LETLDLPPFLSLD	4.3147	5.80397	282	IESGVVDLETLDLPPFLSLD	6.481	14.0337
TDA9	Q04545	1151	1199	LSEREYKLQTFAEFLRVPDNGSLDIESLDSSLIENTLNSHDVTNQALD	1172	SLDIESLDSSLIE	1.44426	1.80153	1169	DNGSLDIESLDSSLIENTLN	2.55241	2.83003
YLR278C	Q05854	1305	1340	VTNADIRKKRSNWDNMMTSGPVEDFWTINDDYGFL	1326	VEDFWTINDDYGF	5.231	8.43173	1317	WDNMMTSGPVEDFWTINDDY	6.54429	14.4004
ECM22	Q05958	649	698	DLGEAVINQSNHNNDNDNSNNGDGNNNNTISELVCFDESIADLYPVEID	684	FDESIADLYPVEI	2.61912	2.90802	677	TISELVCFDESIADLYPVEI	3.957	5.01661
ARR1	Q06596	152	205	IGCTNLSNDIPGYSFLNDAMSEIHTFGDFNGELDSTFLEFSGTEIKEPNNFIT	179	DFNGELDSTFLEF	4.2614	5.67926	177	FGDFNGELDSTFLEFSGTEI	6.79586	15.9553
RDR1	Q08904	510	545	QQLEQATHQRSNLETTHLLDIDWDALLDPSDTLNF	525	THLLDIDWDALLD	5.68312	10.1378	523	ETTHLLDIDWDALLDPSDTL	6.65372	15.0573
AFT2	Q08957	363	415	NAPTADTDIATNLGKERNENFGMLNYNYEALLHFNDEHFNELNSIDPALISK	381	ENFGMLNYNYEAL	2.8866	3.24298	380	NENFGMLNYNYEALLHFNDE	5.59512	9.78066
AFT2	Q08957	263	321	CVKIEKEDSLTNLNEIDFTNMFCNDNFIQNYNQGLMELLTEPTPGPSSSSCILPSTPT	277	EIDFTNMFCNDNF	3.86012	4.82239	270	DSLTNLNEIDFTNMFCNDNF	5.93735	11.2446
UPC2	Q12151	890	912	MMLDFLGGGLPSMTTTNFSDFS	890	MMLDFLGGGLPSM	1.55211	1.88248	891	MLDFLGGGLPSMTTTNFSDF	3.02267	3.42791
YRR1	Q12172	757	809	MLPSPGETKNHAKSQSEIIQMLTDEFWANYNSGWEELINQSEFSTLFDDYKD	780	DEFWANYNSGWEE	4.60946	6.54485	780	DEFWANYNSGWEELINQSEF	7.59734	22.1193
HAL9	Q12180	964	1029	TSLVYPIHSSDTGDTLSSGLETPENSNFNSDSGIKEDFEAFRALLPLGKLIYDRDYSFVNTFRDY	1013	LIYDRDYSFVNTF	1.62765	1.94134	991	FNSDSGIKEDFEAFRALLPL	1.32634	1.717
WTM2	Q12206	328	402	LTHRQNGEEPIQNEIAKLFHSGGDSVVDILFSQTSATEFVTVGGTGNVYHWDMEYSFSRNDDDNEDEVRVAAPE	373	GNVYHWDMEYSFS	3.01634	3.41908	365	EFVTVGGTGNVYHWDMEYSF	3.91696	4.93542
YLL054C	Q12244	777	842	SLDLEILEELEKLISAQEFSRNFTEDVDESLQSEIDLMNYDNEALNQLMAIDLDKLLGIFPNLSN	777	SLDLEILEELEKL	4.96929	7.57865	777	SLDLEILEELEKLISAQEFS	6.15736	12.2995
YRM1	Q12340	737	785	SENASHNNETGPIETELAQTISNEFWTAYNLGWEELMSQPDYKYLFDT	759	NEFWTAYNLGWEE	5.08501	7.94464	759	NEFWTAYNLGWEELMSQPDY	6.83358	16.2025
YRM1	Q12340	184	241	PLEKTGSDILQQVCNVLPSFEQSSKIITDFFNTELETNEVSEVLDKTKIINDFTSSF	209	IITDFFNTELETN	2.58924	2.87283	209	IITDFFNTELETNEVSEVLD	4.54199	6.36734
HAA1	Q12753	658	693	DLPDTSPMSSIQTASPPSQLLTDQGFADLDNFMSS	678	LTDQGFADLDNFM	2.94315	3.3186	672	SPPSQLLTDQGFADLDNFMS	3.44839	4.07742
HAA1	Q12753	274	335	NSRVGEVSVPLEEYIPSDIDGVGRVTDKSSLVYDWPFDESIERNFSTTATAATGESKFDIN	302	SSLVYDWPFDESI	4.66892	6.70539	300	DKSSLVYDWPFDESIERNFS	4.83662	7.17975
HAA1	Q12753	167	228	GKISKDYHHVPSLASISSLQSSQSLDQNFSIPQSPPLSSMSFNFLTGNINETNQNHSNHQH	205	SMSFNFLTGNINE	1.13233	1.58646	191	LDQNFSIPQSPPLSSMSFNF	1.61311	1.92988

## Sheet: Core ADs, minimal length
protein	protein ID	AD start	AD stop	AD sequence	core position	core length	core sequence	core predicted Z score	core predicted activation
GCN4	P03069	63	142	NLDFDFALPQTATAPDAKTVLPIPELDDAVVESFFSSSTDSTPMFEYENLEDNSKEWTSLFDNDIPVTTDDVSLADKAI	118	10	EWTSLFDNDI	3.69754	4.5132
GCN4	P03069	63	142	NLDFDFALPQTATAPDAKTVLPIPELDDAVVESFFSSSTDSTPMFEYENLEDNSKEWTSLFDNDIPVTTDDVSLADKAI	84	14	PIPELDDAVVESFF	3.22918	3.72891
GAL4	P04386	832	880	SKPLSPGWTDQTAYNAFGITTGMFNTTTMDDVYNYLFDDEDTPPNPKK	862	9	DVYNYLFDD	4.10291	5.324
GAL4	P04386	146	199	SIDSAAHHDNSTIPLDFMPRDALHGFDWSEEDDMSDGLPFLKTDPNNNGFFGD	171	16	FDWSEEDDMSDGLPFL	3.75438	4.61898
ARG81	P05085	194	256	KGHVKTGILSANDGVPPTPNLLDYDWNNLNITGYEWISSELRDDALLSAVTLQGHHLGHTQP	214	9	LLDYDWNNL	3.10973	3.55173
ARG81	P05085	194	256	KGHVKTGILSANDGVPPTPNLLDYDWNNLNITGYEWISSELRDDALLSAVTLQGHHLGHTQP	227	14	YEWISSELRDDALL	3.68817	4.496
ARG81	P05085	69	126	IPQNSPATTTNLSGSVDEPQYQRRNIDFVRYDEEYVYHEDMDDELTMLHTPPIEKIS	103	14	YVYHEDMDDELTML	3.52864	4.21298
ADR1	P07248	402	455	TVAIDNNSNNNKVSDNQPDFVDFQELLDNDTLGNDLLETTAVLKEFELLHDDS	420	9	DFVDFQELL	3.50311	4.16937
ADR1	P07248	402	455	TVAIDNNSNNNKVSDNQPDFVDFQELLDNDTLGNDLLETTAVLKEFELLHDDS	431	23	DTLGNDLLETTAVLKEFELLHDD	3.46399	4.10341
ADR1	P07248	639	688	YLDLFKNNFLPHFPIIHPSLLDLDLDSLQRYTNEDGYDDAENAQLFDRL	658	9	LLDLDLDSL	3.34203	3.90444
ADR1	P07248	250	321	PKDRVKFSTPELVPLDLKNPELDSSFDLNMNLDLNLNLDSNFNIALNRSDSSGSTMNLDYKLPESANNYTY	271	13	LDSSFDLNMNLDL	3.59364	4.32607
ADR1	P07248	324	377	SPTRAYVGANTNSKNASFNDADLLSSSYWIKAYNDHLFSVSESDETSPMNSEL	341	12	FNDADLLSSSYW	3.36775	3.94557
ADR1	P07248	479	545	HKLIYKNKEGTNDDMLISFGLDHPSNREDDLDKLCNMTRDVQAIFSQYLKGEESKRSLEDFLSTSN	491	10	DDMLISFGLD	3.62876	4.38844
ADR1	P07248	1192	1245	SFNDTSFLNMEDPIRNEFSFDNGDRAVTDLPRSAHFLSDTGLEGINFSGLNDS	1195	18	DTSFLNMEDPIRNEFSFD	3.17341	3.64511
PHO2	P07269	0	36	MMEEFSYDHDFNTHFATDLDYLQHDQQQQQQQQHDQ	1	14	MEEFSYDHDFNTHF	3.13725	3.59178
PHO2	P07269	428	481	PQQNIAPPFLNTNSSATDSNPNTNLEDSLFFDHDLLSSSITNTNNGQGSNNGR	452	8	LEDSLFFD	3.5412	4.23461
PHO2	P07269	143	196	IPSSQSRDIANDYDRGSTDNNLVTTTSTSSIFHDEDLTFFDRIPLNSNNNYYF	174	10	FHDEDLTFFD	3.84884	4.80027
PHO4	P07270	52	101	QENHNSSENGNENENEQDSLALDDLDRAFELVEGMDMDWMMPSHAHHSP	84	9	EGMDMDWMM	3.37042	3.94987
PHO4	P07270	52	101	QENHNSSENGNENENEQDSLALDDLDRAFELVEGMDMDWMMPSHAHHSP	69	14	DSLALDDLDRAFEL	3.38513	3.97362
PPR1	P07272	774	903	YDKKTNVLGFDDGTFDNKVFNRTNFEEKAPFDIPLDEFFTELEKHSNVSQFNTLDVSEGNQVINESASTNTSSALNCQSYTNNQDIMDILFQVTSGSVWDEFFVRSGNGNEGESSYDISKGKNSESGGI	870	7	SVWDEFF	3.1585	3.62303
PPR1	P07272	774	903	YDKKTNVLGFDDGTFDNKVFNRTNFEEKAPFDIPLDEFFTELEKHSNVSQFNTLDVSEGNQVINESASTNTSSALNCQSYTNNQDIMDILFQVTSGSVWDEFFVRSGNGNEGESSYDISKGKNSESGGI	808	8	LDEFFTEL	3.2587	3.77406
PPR1	P07272	774	903	YDKKTNVLGFDDGTFDNKVFNRTNFEEKAPFDIPLDEFFTELEKHSNVSQFNTLDVSEGNQVINESASTNTSSALNCQSYTNNQDIMDILFQVTSGSVWDEFFVRSGNGNEGESSYDISKGKNSESGGI	855	10	NNQDIMDILF	3.11634	3.5613
PPR1	P07272	774	903	YDKKTNVLGFDDGTFDNKVFNRTNFEEKAPFDIPLDEFFTELEKHSNVSQFNTLDVSEGNQVINESASTNTSSALNCQSYTNNQDIMDILFQVTSGSVWDEFFVRSGNGNEGESSYDISKGKNSESGGI	781	26	LGFDDGTFDNKVFNRTNFEEKAPFDI	3.53212	4.21896
PPR1	P07272	322	375	ALASDQTGINSAFEIPITSAFSAHTEPKRENVTEKIDVCSSVDVPWYDTWETS	360	13	CSSVDVPWYDTWE	3.1911	3.67149
SWI5	P08153	0	117	MDTSNSWFDASKVQSLNFDLQTNSYYSNARGSDPSSYAIEGEYKTLATDDLGNILNLNYGETNEVIMNEINDLNLPLGPLSDEKSVKVSTFSELIGNDWQSMNFDLENNSREVTLNA	97	9	DWQSMNFDL	3.70187	4.52118
SWI5	P08153	0	117	MDTSNSWFDASKVQSLNFDLQTNSYYSNARGSDPSSYAIEGEYKTLATDDLGNILNLNYGETNEVIMNEINDLNLPLGPLSDEKSVKVSTFSELIGNDWQSMNFDLENNSREVTLNA	63	19	EVIMNEINDLNLPLGPLSD	3.32088	3.87092
SWI5	P08153	0	117	MDTSNSWFDASKVQSLNFDLQTNSYYSNARGSDPSSYAIEGEYKTLATDDLGNILNLNYGETNEVIMNEINDLNLPLGPLSDEKSVKVSTFSELIGNDWQSMNFDLENNSREVTLNA	36	25	YAIEGEYKTLATDDLGNILNLNYGE	3.45079	4.0814
LEU3	P08638	833	885	LLETYPIVQSNPVTTTIKESPNSIMAGWDNWESDMVWRDVDILMNEFAFNPK	860	10	WDNWESDMVW	4.82524	7.14651
LEU3	P08638	833	885	LLETYPIVQSNPVTTTIKESPNSIMAGWDNWESDMVWRDVDILMNEFAFNPK	871	11	DVDILMNEFAF	3.13611	3.59011
HAP1	P0CE41	1397	1459	TLTSPQGSDLASNSATQYKPDLEDFLMQNSNFNGLMINPSSLVEVVGGYNDPNNLGRNDAVD	1417	12	DLEDFLMQNSNF	3.37421	3.95598
HSF1	P10961	0	75	MNNAANTGTTNESNVSDAPRIEPLPSLNDDDIEKILQPNDIFTTDRTDASTTSSTAIEDIINPSLDPQSAASPVP	20	22	IEPLPSLNDDDIEKILQPNDIF	3.09566	3.53142
HSF1	P10961	602	660	RFTMLSDDDLKKDSHTNDNKHNESDLFWDNVHRNIDEQDARLQNLENMVHILSPGYPN	623	10	NESDLFWDNV	3.28614	3.81649
RAP1	P11938	619	681	AAAAAAAASNSYAIPENELLDEDTMNFISSLKNDLSNISNSLPFEYPHEIAEAIRSDFSNED	637	13	LLDEDTMNFISSL	3.704	4.52511
RAP1	P11938	619	681	AAAAAAAASNSYAIPENELLDEDTMNFISSLKNDLSNISNSLPFEYPHEIAEAIRSDFSNED	652	25	DLSNISNSLPFEYPHEIAEAIRSDF	3.39781	3.99421
PDR1	P12383	1032	1067	NFSATSFNLGTLDEFVNNGDLEDLYSILWSDVYPD	1051	10	DLEDLYSILW	4.69421	6.77488
PDR1	P12383	1032	1067	NFSATSFNLGTLDEFVNNGDLEDLYSILWSDVYPD	1032	18	NFSATSFNLGTLDEFVNN	3.22185	3.71779
STE12	P13574	272	347	LIIEPNTLELNGLTEETPHDLPKNTAKGRDEEDFPLDYFPVSVEYPTEENAFDPFPPQAFTPAAPSMPISYDNVN	303	8	EDFPLDYF	3.31351	3.85931
STE12	P13574	441	507	QLYSNNFQQSYPNGMVPGYYPKMPYNPMGGDPLLDQAFYGADDFFFPPEGCDNNMLYPQTATSWNV	478	9	FYGADDFFF	3.28624	3.81665
HAP4	P14064	300	395	DLNEIKFFNDFEKLEFFNKYAKVNTNNDVNENNDLWNSYLQSMDDTTGKNSGNYQQVDNDDNMSLLNLPILEETVSSGQDDKVEPDEEDIWNYLP	306	10	FFNDFEKLEF	4.09599	5.30899
HAP4	P14064	300	395	DLNEIKFFNDFEKLEFFNKYAKVNTNNDVNENNDLWNSYLQSMDDTTGKNSGNYQQVDNDDNMSLLNLPILEETVSSGQDDKVEPDEEDIWNYLP	333	12	DLWNSYLQSMDD	3.54825	4.24678
HAP4	P14064	300	395	DLNEIKFFNDFEKLEFFNKYAKVNTNNDVNENNDLWNSYLQSMDDTTGKNSGNYQQVDNDDNMSLLNLPILEETVSSGQDDKVEPDEEDIWNYLP	356	17	VDNDDNMSLLNLPILEE	3.2886	3.82033
HAP4	P14064	116	181	NRKQASKEKRKIPRHIQTIDEKLINDSNYLAFLKFDDLENEKFHSSASSISSPSYSSPSFSSYRN	141	12	DSNYLAFLKFDD	3.29769	3.83451
HAP4	P14064	424	485	ETYLFLQDQDESADSHHHDELGSEITLADNKFSYLPPTLEELMEEQDCNNGRSFKNFMFSN	455	13	FSYLPPTLEELME	3.5007	4.16526
HAP4	P14064	518	553	DLNDNNNDATATNELDQSSFIDDLDEDVDFLKVQV	537	12	FIDDLDEDVDFL	3.88763	4.87676
MTF1	P14908	200	253	DTKLIAISDANELKGFDSQCIEEWDPILFSAAEIWPTKGKPIALVEMDPIDFD	220	9	IEEWDPILF	3.67422	4.47052
MTF1	P14908	100	148	DPYDWSTYSNLIDEERIFVPEVQSSDHINDKFLTVANVTGEGSEGLIM	102	12	YDWSTYSNLIDE	3.12689	3.57665
CUP2	P15315	172	224	QSPSISMEPVSINETGSAYTTTNTALNDIDIPFSINELNELYKQVSSHNSHS	197	13	LNDIDIPFSINEL	3.90494	4.91129
CUP2	P15315	104	164	CHRRANDEAAHVNGLGIADLDVLLGLNGRSSDVDMTTTLPSLKPPLQNGEIKADSIDNLD	120	11	IADLDVLLGLN	3.59468	4.32792
TEC1	P18412	209	257	EKELLHLIEHGAEQTTENSNLFYDIFEEIIDSLPSVSDSGSLTPKNLY	230	8	FYDIFEEI	3.26738	3.78743
TEC1	P18412	0	48	MSLKEDDFGKDNSRNIESYTGRIFDVYIQKDSYSQSALDDMFPEAVVS	23	19	FDVYIQKDSYSQSALDDMF	3.42612	4.04057
GLN3	P18494	26	91	EPRQTGDSRSQSSGNTGENEEDIAFASGLNGGTFDSMLEALPDDLYFTDFVSPFTAAATTSVTTK	68	8	DDLYFTDF	3.94481	4.99175
GLN3	P18494	26	91	EPRQTGDSRSQSSGNTGENEEDIAFASGLNGGTFDSMLEALPDDLYFTDFVSPFTAAATTSVTTK	46	19	EDIAFASGLNGGTFDSMLE	3.48627	4.14085
GLN3	P18494	91	167	TVKDTTPATNHMDDDIAMFDSLATTQPIDIAASNQQNGEIAQLWDFNVDQFNMTPSNSSGSATISAPNSFTSDIPQ	133	9	LWDFNVDQF	3.57544	4.29411
GLN3	P18494	91	167	TVKDTTPATNHMDDDIAMFDSLATTQPIDIAASNQQNGEIAQLWDFNVDQFNMTPSNSSGSATISAPNSFTSDIPQ	102	19	MDDDIAMFDSLATTQPIDI	3.33887	3.8994
GLN3	P18494	707	729	STKGSSKESSAIADELDWLKFG	718	8	IADELDWL	3.56679	4.279
RDS2	P19541	106	162	SSLVNDTTSLLLPQQPVFVSENVGSEFSSLNEFLSMLENPLLTQTSLSSSSASNVH	132	12	FSSLNEFLSMLE	3.51073	4.18233
YAP1	P19880	467	529	ANLAFPDDNSTNIQLQPFSESQSQNKFDYDMFFRDSSKEGNNLFGEFLEDDDDDKKAANMSD	493	7	FDYDMFF	3.60123	4.33948
YAP1	P19880	467	529	ANLAFPDDNSTNIQLQPFSESQSQNKFDYDMFFRDSSKEGNNLFGEFLEDDDDDKKAANMSD	505	12	EGNNLFGEFLED	3.59152	4.32234
YAP1	P19880	401	467	GSTGNKNKKNNNNSDDVLPFISESPFDMNQVTNFFSPGSTGIGNNAASNTNPSLLQSSKEDIPFIN	415	14	DDVLPFISESPFDM	3.81277	4.73022
YAP1	P19880	234	308	DSLSNSNDVLNNTPNSSTSMDWLDNVIYTNRFVSGDDGSNSKTKNLDSNMFSNDFNFENQFDEQVSEFCSKMNQ	253	9	MDWLDNVIY	3.56071	4.26841
YAP1	P19880	234	308	DSLSNSNDVLNNTPNSSTSMDWLDNVIYTNRFVSGDDGSNSKTKNLDSNMFSNDFNFENQFDEQVSEFCSKMNQ	279	12	LDSNMFSNDFNF	3.38723	3.97703
ACE2	P21192	13	87	GFAKDTQDEEYVQHHDNVNPTIPPPDNYILNNENDDGLDNLLGMDYYNIDDLLTQELRDLDIPLVPSPKTGDGS	57	9	DYYNIDDLL	3.31966	3.869
ACE2	P21192	13	87	GFAKDTQDEEYVQHHDNVNPTIPPPDNYILNNENDDGLDNLLGMDYYNIDDLLTQELRDLDIPLVPSPKTGDGS	37	19	PDNYILNNENDDGLDNLLG	3.10008	3.53779
ACE2	P21192	312	369	YPNKSPESNGLNLFSSNSGYLRDSELLSFSPQNYNLNLDGLTYNDHNNTSDKNNNDK	334	19	DSELLSFSPQNYNLNLDGL	3.22505	3.72265
DAL82	P21705	177	230	INKGTNRFSETVLPPQMAAEQSWSDSNMELEICLDYLHNELEVIKKRQEDFEC	201	13	DSNMELEICLDYL	3.43899	4.06181
BAS1	P22035	694	760	DQSEISRTTSRSDTPLRDEDGLDFWETLRSLATTNPNPPVEKSAENDGAKPQVVHQGIGSHTEDSS	713	9	DGLDFWETL	4.42407	6.06854
BAS1	P22035	480	554	LMDSFPHMGRQLGNGLPGLNSNSDTFNPEYRTSLDNMDSDFLSRTPNYNAFSLEATSHNPADNANELGSQSNRE	493	29	NGLPGLNSNSDTFNPEYRTSLDNMDSDFL	3.14074	3.59689
AFT1	P22149	390	508	HSSTAFSGYIDDPFNLNEILPLPASDFKLNTVTNLNEIDFTNIFTKSPHPHSGSTHPRQVFDQLDDCSSILFSPLTTNTNNEFEGESDDFVHSPYLNSEADFSQILSSAPPVHHDPNE	450	12	FDQLDDCSSILF	4.01991	5.14691
AFT1	P22149	390	508	HSSTAFSGYIDDPFNLNEILPLPASDFKLNTVTNLNEIDFTNIFTKSPHPHSGSTHPRQVFDQLDDCSSILFSPLTTNTNNEFEGESDDFVHSPYLNSEADFSQILSSAPPVHHDPNE	398	12	YIDDPFNLNEIL	3.11251	3.55575
AFT1	P22149	390	508	HSSTAFSGYIDDPFNLNEILPLPASDFKLNTVTNLNEIDFTNIFTKSPHPHSGSTHPRQVFDQLDDCSSILFSPLTTNTNNEFEGESDDFVHSPYLNSEADFSQILSSAPPVHHDPNE	418	17	LNTVTNLNEIDFTNIFT	3.10805	3.5493
AFT1	P22149	390	508	HSSTAFSGYIDDPFNLNEILPLPASDFKLNTVTNLNEIDFTNIFTKSPHPHSGSTHPRQVFDQLDDCSSILFSPLTTNTNNEFEGESDDFVHSPYLNSEADFSQILSSAPPVHHDPNE	477	20	DDFVHSPYLNSEADFSQILS	3.30287	3.8426
CAD1	P24813	170	252	EKVMWNIGSWNAPSLTNSWDSPPGNRTGAVTIGDESINGSEMPDFSLDLVSNDRQTGLEALDYDIHNYFPQHSERLTAEKID	227	12	LEALDYDIHNYF	3.10621	3.54664
CAD1	P24813	170	252	EKVMWNIGSWNAPSLTNSWDSPPGNRTGAVTIGDESINGSEMPDFSLDLVSNDRQTGLEALDYDIHNYFPQHSERLTAEKID	201	19	IGDESINGSEMPDFSLDLV	3.53737	4.228
HCM1	P25364	184	240	PGAETKFFKGENRGYEFVKDSLQDIGKYFEIDSTLDELEQVESGEGNDDLPDEEER	211	11	YFEIDSTLDEL	3.31679	3.86447
PUT3	P25502	892	978	ASLENSYQTTLTEKGSQVMEKNMDQLDSVHNLNDDDLQQLLEDLGNIDHSDEKLWKEITDQAMWLGNTMDPTAAAGSEIDFTDYLG	926	10	DDLQQLLEDL	4.03543	5.17957
PUT3	P25502	892	978	ASLENSYQTTLTEKGSQVMEKNMDQLDSVHNLNDDDLQQLLEDLGNIDHSDEKLWKEITDQAMWLGNTMDPTAAAGSEIDFTDYLG	946	16	WKEITDQAMWLGNTMD	3.58483	4.31058
RDS1	P25611	779	831	SFAIKANTAMSQNTAEEFFNISEEEALNQLLENNNFDAFWDLLGENLSDMPS	814	7	FDAFWDL	3.65163	4.42954
RDS1	P25611	779	831	SFAIKANTAMSQNTAEEFFNISEEEALNQLLENNNFDAFWDLLGENLSDMPS	795	14	EFFNISEEEALNQL	3.15352	3.61569
INO2	P26798	100	161	MGFDQALGLKLSPSSSGLLSTNESNAIEQFLDNLISQDMMSSNASMNSESHLHIRSPKKQH	129	11	FLDNLISQDMM	3.10685	3.54756
INO2	P26798	0	60	MQQATGNELLGILDLDNDIDFETAYQMLSSNFDDQMSAHIHENTFSATSPPLLTHELGII	8	13	LLGILDLDNDIDF	3.64227	4.41268
CAM1	P29547	362	414	AFDVAPDWESYDYAKLDPTNDDDKEFINNMWAWDKPVSVNGEPKEIVDGKVL	386	10	EFINNMWAWD	3.48619	4.14071
MET4	P32389	77	169	TNLYDHAVTPEILLEQLAYVDNFIPSLDNEFSNVDWNVNTTHNNANNNGADTFSSINANPFDLDEQLAIELSAFADDSFIFPDEDKPSNNNN	137	11	FDLDEQLAIEL	3.42575	4.03996
MET4	P32389	77	169	TNLYDHAVTPEILLEQLAYVDNFIPSLDNEFSNVDWNVNTTHNNANNNGADTFSSINANPFDLDEQLAIELSAFADDSFIFPDEDKPSNNNN	149	12	AFADDSFIFPDE	3.11645	3.56146
MET4	P32389	77	169	TNLYDHAVTPEILLEQLAYVDNFIPSLDNEFSNVDWNVNTTHNNANNNGADTFSSINANPFDLDEQLAIELSAFADDSFIFPDEDKPSNNNN	95	13	YVDNFIPSLDNEF	3.46087	4.0982
FZF1	P32805	237	298	DPESYWSDNRCKHSDCQELSPFASVFDLIDHYDHTHAFIPETLVKYSYIHLYKPSVWDLFE	254	13	ELSPFASVFDLID	3.33948	3.90037
RGT1	P32862	1147	1169	NVALENFVSIGWKLLDDSELGW	1151	13	ENFVSIGWKLLDD	3.28796	3.81933
TYE7	P33122	38	103	VNKDSSSVLSASSSTWFEPLENIISSASSSSIGSPIEDQFISSNNEESALFPTDQFFSNPSSYSH	53	23	WFEPLENIISSASSSSIGSPIED	3.25651	3.77069
PDR3	P33200	927	975	KRQHSAPSQISANENNIYNLGTLEEFVSSGDLTDLYHTLWNDNTSYPF	957	12	DLTDLYHTLWND	3.66461	4.45304
PDR3	P33200	65	127	PSSHANVEASADVQHLDTAIKLDNQYYFKLMNDLIQTPVSPSATHAPDTSNNPTNDNNILFK	74	25	SADVQHLDTAIKLDNQYYFKLMNDL	3.26022	3.77639
MSN2	P33748	0	74	MTVDHDFNSEDILFPIESMSSIQYVENNNPNNINNDVIPYSLDIKNTVLDSADLNDIQNQETSLNLGLPPLSFD	5	12	DFNSEDILFPIE	3.78033	4.66809
MSN2	P33748	233	291	YSNSISNSNSNSTGNLNSSYFNSLNIDSMLDDYVSSDLLLNDDDDDTNLSRRRFSDVI	261	12	MLDDYVSSDLLL	3.86005	4.82226
MSN2	P33748	345	393	NANADSNIAGNPKNNDATIDNELTQILNEYNMNFNDNLGTSTSGKNKS	369	15	QILNEYNMNFNDNLG	3.20715	3.69558
MSN2	P33748	485	538	QFIKPSMILSDNASVIAKVATTGLSNDMPFLTEEGEQNANSTPNFDLSITQMN	507	27	GLSNDMPFLTEEGEQNANSTPNFDLSI	3.15611	3.61951
MSN4	P33749	385	472	HDIESFANDSVMANPLSDSASFLSEENEDDAFGALNYNSLDATTMSAFDNNVDPFNILKSSPAQDQQFIKPSMMLSDNASAAAKLAT	406	20	FLSEENEDDAFGALNYNSLD	3.47658	4.12452
MSN4	P33749	385	472	HDIESFANDSVMANPLSDSASFLSEENEDDAFGALNYNSLDATTMSAFDNNVDPFNILKSSPAQDQQFIKPSMMLSDNASAAAKLAT	432	30	FDNNVDPFNILKSSPAQDQQFIKPSMMLSD	4.01601	5.13873
MSN4	P33749	192	266	AEPSIYSNLFLDARLPNNANSTTGLNDNDYNLDDTNNDNTNSMQSILEDFVSSEEALKFMPDAGRDARRYSEVV	234	18	MQSILEDFVSSEEALKFM	3.26821	3.78871
SEF1	P34228	1112	1147	NKLTDFFQQQSAGWIEGNSSNDDFFGWFDMNMEQG	1134	7	DFFGWFD	4.54162	6.36638
MAC1	P35192	260	322	STQCSCEDESCPCVNCLIHRSEEELNSYIQQSGVPLTNIGEAQITDKMMDYLDDCKCTDKEC	288	27	IQQSGVPLTNIGEAQITDKMMDYLDDC	3.18966	3.66933
MAC1	P35192	182	235	SNGKTNKAPSDDIFTPYGSLESTSAFNDILQENYNSSVPGAHDSSETLTPQST	192	20	DDIFTPYGSLESTSAFNDIL	3.53451	4.22307
YKL222C	P35995	644	704	DEGPETENDATENSLTTILNDLEGPLEDFSENFIDDILGSPSAFFDTAISGWSNFEDFFS	695	8	WSNFEDFF	4.07847	5.27123
YKL222C	P35995	644	704	DEGPETENDATENSLTTILNDLEGPLEDFSENFIDDILGSPSAFFDTAISGWSNFEDFFS	672	10	FSENFIDDIL	3.34773	3.91351
OAF3	P36023	827	862	LLQQPLAPALPVNDLIVSEFDVIEDIFDPVDFVSF	845	9	EFDVIEDIF	3.86463	4.83127
OAF3	P36023	90	143	QTRQDEDHWQRVRELENQSSLYYLPIHEETPFFIDLIPNGFYLETKRSADNLF	117	17	EETPFFIDLIPNGFYLE	3.10261	3.54144
TBS1	P38114	891	935	KMEVSFNIFNEITIQDLNFLQFSSIPKLWENKTLEPGEEYHHSN	899	14	FNEITIQDLNFLQF	3.57225	4.28853
RTG3	P38165	425	485	YDSVGNHNHAGTMESHPHTNIHEELKEFLSGDLIEAEDNAKLMFGDDNSNPADYLLEFGS	467	16	MFGDDNSNPADYLLEF	3.67414	4.47037
RTG3	P38165	425	485	YDSVGNHNHAGTMESHPHTNIHEELKEFLSGDLIEAEDNAKLMFGDDNSNPADYLLEFGS	443	19	TNIHEELKEFLSGDLIEAE	3.1532	3.61521
RTG3	P38165	140	206	DSPVDRAMNTPLQQQEGLKAELPHDFLFQHGTDDTMYNLTDDLSSSLSSSINSDMMTPNTYSSSFS	165	18	FLFQHGTDDTMYNLTDDL	3.12327	3.57139
RTG3	P38165	81	140	QARSNSQTPTASTIYEEAESQSSYLDDMFRTSQGGRPVTQNSISSIGQGPLRSSYSMAY	95	15	YEEAESQSSYLDDMF	4.00239	5.1103
RTG3	P38165	0	48	MMNNNESEAENQRLLDELMNQTKVLQETLDFSLVTPTPHHNDDYKIHG	5	28	ESEAENQRLLDELMNQTKVLQETLDFSL	3.1886	3.66775
STB5	P38699	707	742	VPNMDQLTRELFGASDSYQDILDENNVDVSWVDKL	710	20	MDQLTRELFGASDSYQDILD	3.79928	4.70428
STP2	P38704	488	540	TEEDAINQSKESNMISINEMLQKQMDFELLGENHLKETQDYLALYKKAYGIE	511	19	QMDFELLGENHLKETQDYL	3.36306	3.93804
RSC30	P38781	147	209	VRSDSPDVPSMDQIREYNTRLQLVNAQSFDYTDNPYSFNVGINQDSAVFDLMTSPFTQEEVL	191	17	DSAVFDLMTSPFTQEEV	3.22054	3.7158
NDT80	P38830	591	626	ADRVYSKGVKLIASGTLPSGIFNREELFEEDSFYK	607	18	LPSGIFNREELFEEDSFY	3.1908	3.67105
CAT8	P39113	1225	1291	SNTSQGSILGSTKHGMDNCDFNDLGNFNNFMTNVNYSGVDYDYIVDASLGLAPLLVDTPDISNTNT	1260	14	YSGVDYDYIVDASL	3.41602	4.02397
CAT8	P39113	1225	1291	SNTSQGSILGSTKHGMDNCDFNDLGNFNNFMTNVNYSGVDYDYIVDASLGLAPLLVDTPDISNTNT	1240	15	MDNCDFNDLGNFNNF	3.11399	3.5579
CAT8	P39113	1023	1119	KNMSTSNLFPFSFSNTDLTALFTHPEGPNCTNTNNGNVDVCNRASTDATDANIENLSFLNMAPFLQTGNSNIGQNTIENKPMHMDAIFSLPSNLDL	1072	19	DANIENLSFLNMAPFLQTG	3.41542	4.02299
CAT8	P39113	1023	1119	KNMSTSNLFPFSFSNTDLTALFTHPEGPNCTNTNNGNVDVCNRASTDATDANIENLSFLNMAPFLQTGNSNIGQNTIENKPMHMDAIFSLPSNLDL	1031	19	FPFSFSNTDLTALFTHPEG	3.16376	3.63081
FHL1	P39521	82	131	VTDDNGNLKLELPDNLDNADFSKLLEFDAKNDEALFNSNELLSHTMDPV	98	12	DNADFSKLLEFD	3.29568	3.83136
YJL206C	P39529	684	757	EADLKFQNTNNESHTTTAAQEEYLDKLLAEFEEFDYSINRVLPDVIDFSALIGQDSSANNQIFSSEFSSDPTV	711	11	LAEFEEFDYSI	3.62235	4.377
YJL206C	P39529	684	757	EADLKFQNTNNESHTTTAAQEEYLDKLLAEFEEFDYSINRVLPDVIDFSALIGQDSSANNQIFSSEFSSDPTV	725	14	LPDVIDFSALIGQD	3.60872	4.35275
OAF1	P39720	1011	1046	LPNGFDRGQANNTPFPGYFGGLDLFDYDFLFGNDF	1036	6	DYDFLF	3.4798	4.12994
RPH1	P39956	133	228	KNFESSFNIDDFEQFRTEYTIDLSDFQNTERLKFLEEYYWKTLNFTTPMYGADTPGSIFPEGLNVWNVAKLPNILDHMETKVPGVNDSYLYAGLW	135	13	FESSFNIDDFEQF	4.70546	6.806
RPH1	P39956	133	228	KNFESSFNIDDFEQFRTEYTIDLSDFQNTERLKFLEEYYWKTLNFTTPMYGADTPGSIFPEGLNVWNVAKLPNILDHMETKVPGVNDSYLYAGLW	168	24	EEYYWKTLNFTTPMYGADTPGSIF	3.15374	3.616
TOG1	P39961	745	793	KLSPSSTSVSVGMDFCSLENFVTAESLPDLLNLFWEDTEFGITKENLG	777	8	LFWEDTEF	3.16443	3.6318
TOG1	P39961	745	793	KLSPSSTSVSVGMDFCSLENFVTAESLPDLLNLFWEDTEFGITKENLG	757	16	MDFCSLENFVTAESLP	3.19641	3.67944
ASG1	P40467	916	963	IEDKEEMSPNIEIKNEQNMTDSNDILGVFDQLDAQLFGKYLPLNYPS	941	13	LGVFDQLDAQLFG	3.21886	3.71326
ASG1	P40467	710	810	KNSFSLAKSEESTNDYAMANYLNNTPISENPLNEAQQQDQVSQGTTNMSNERDPNNFLSIDIRLDNNGQSNILDATDDVFIRNDGDIPTNSAFDFSSSKS	762	29	DPNNFLSIDIRLDNNGQSNILDATDDVFI	4.08141	5.27754
CEP3	P40969	572	607	QESLLEEEDENNTEPSDFRTIVEEFQSEYNISDIL	588	18	DFRTIVEEFQSEYNISDI	3.46516	4.10537
LYS14	P40971	259	307	PLDEIESLEIPNLDLTTTMNGYDVNLLMQNLNDMVNMKLHDSYLLNEE	260	14	LDEIESLEIPNLDL	3.09149	3.52543
LYS14	P40971	259	307	PLDEIESLEIPNLDLTTTMNGYDVNLLMQNLNDMVNMKLHDSYLLNEE	277	29	MNGYDVNLLMQNLNDMVNMKLHDSYLLNE	3.20871	3.69793
LYS14	P40971	508	557	TVFGGSLIDNNDLDAIFDPYDYQYVDSLKFLNIMTPLNEFNLLRGHKED	519	11	DLDAIFDPYDY	3.16431	3.63162
HAC1	P41546	173	237	STTLPAVDNNNLFDAVASPLADPLCDDIAGNSLPFDNSIDLDNWRNPEAQSGLNSFELNDFFIT	225	11	LNSFELNDFFI	3.27247	3.7953
HAC1	P41546	173	237	STTLPAVDNNNLFDAVASPLADPLCDDIAGNSLPFDNSIDLDNWRNPEAQSGLNSFELNDFFIT	205	12	LPFDNSIDLDNW	3.88902	4.87954
AZF1	P41696	244	297	SNGTNNSGNMNTNADYESFFNTGTNNSNSNQNPYFLSSRNNSLKFNPEDFDFQ	257	25	ADYESFFNTGTNNSNSNQNPYFLSS	3.18378	3.66056
GZF3	P42944	0	61	MASQATTLRGYNIRKRDNVFEPKSSENLNSLNQSEEEGHIGRWPPLGYEAVSAEQKSAVQL	26	28	NLNSLNQSEEEGHIGRWPPLGYEAVSAE	3.18098	3.65637
GSM1	P42950	210	267	NKSDDDVDDETNIHFDSMWCNDEYMKLKDIVDISTPFLPNNSQIFSLQESEYPNPSA	224	11	FDSMWCNDEYM	3.93173	4.96522
GAT1	P43574	457	509	NLHNASTSSFNNEAFWKPLDSAIDHHSGDTNPNSNMNTTPNGNLSLDWLNLN	466	15	FNNEAFWKPLDSAID	3.45262	4.08445
GAT1	P43574	102	226	DFSASPFASGVNAAGPGNNDLDDTDTDNQQFFLSDMNLNGSSVFENVFDDDDDDDDVETHSIVHSDLLNDMDSASQRASHNASGFPNFLDTSCSSSFDDHFIFTNNLPFLNNNSINNNHSHNSS	198	13	FDDHFIFTNNLPF	3.59494	4.32837
GAT1	P43574	102	226	DFSASPFASGVNAAGPGNNDLDDTDTDNQQFFLSDMNLNGSSVFENVFDDDDDDDDVETHSIVHSDLLNDMDSASQRASHNASGFPNFLDTSCSSSFDDHFIFTNNLPFLNNNSINNNHSHNSS	126	16	DTDNQQFFLSDMNLNG	3.33882	3.89933
CHA4	P43634	595	647	ENSEDALHNSETMDLLGTLSHGNDFALEYNFDFTLLNEIDMLIGGNTNDGLS	618	10	DFALEYNFDF	4.67578	6.72418
SUM1	P46676	1009	1061	FPHNETLPALGQDGINEDNLNETIDNMLIFDFLDDGSENNQVKYSRIIPPDI	1036	8	LIFDFLDD	3.35261	3.92131
SIP4	P46954	673	726	SNFASKVNTQLNLLQHSSSNSNFLDASPYDFNKIFMNNFENYDYETDEGYAED	701	17	YDFNKIFMNNFENYDYE	3.33692	3.8963
RSF2	P46974	567	620	LLEPSMEPNDKDSNIDPAAIDDKWLSEFINNSDPKSTFKINFNHFNDIGFIYS	587	9	DDKWLSEFI	3.36833	3.94651
RSF2	P46974	365	427	NFELVEDAPHQVGFSTPQMTAKQLMESVSELDLPPLTLDEPPQAIKFNLNLFNNDPSGQQQQ	388	17	LMESVSELDLPPLTLDE	3.22974	3.72977
RSF2	P46974	674	736	YSDPISHSSHKRRRDSVMMDYDLSNFFSSRQLDISKVLNGTEQNNSHVNDDVLTLSFPGETD	692	9	MDYDLSNFF	3.9755	5.05458
ZAP1	P47043	353	415	SLRKPTNTLQGTNHAYHEHILNTDMDLKILEDLCNISSLYEVPFGKHINHHDHNNAGNGCDG	376	11	DMDLKILEDLC	3.18016	3.65516
ZAP1	P47043	599	656	LLKDHVSQDFKHPMEPLACNWEDCDFLGDDTCSIVNHINCQHGINFDIQFANPDSFL	619	12	WEDCDFLGDDTC	3.4398	4.06315
ZAP1	P47043	82	156	AFASGASHDMGGDCHVNEKCKEYTDCQHFEFLNYHNNPSLTKYNDTATYNSNNHSFANNFHSVASDPTSPQQNS	103	24	EYTDCQHFEFLNYHNNPSLTKYND	3.26745	3.78753
TEA1	P47988	693	758	HIFYTQLYPAYDLPKKLQEDTELETEQENQMLNQVGNINYTHDFSLSHEIDDLIRELFGVGTPQK	741	11	EIDDLIRELFG	3.81774	4.73981
RFX1	P48743	441	511	EANKLDSLPPAANNPTGTLSSDELTFTHDLIEKVFNCNDKLSDNYNTQILSNTEHPLLTSYKLDFPKIPA	455	25	PTGTLSSDELTFTHDLIEKVFNCND	3.5601	4.26734
STB4	P50104	913	948	GLPSDVLDTVSKIGNSPNVFDDDLFSNLLWFDQNF	934	9	DDLFSNLLW	3.66348	4.45099
PIP2	P52960	947	995	INNNDNVKLPSNFKNYYDPPMSSLDISMDVPDIFGSLDFFDYDLLFQN	986	7	FDYDLLF	3.52451	4.20589
PIP2	P52960	947	995	INNNDNVKLPSNFKNYYDPPMSSLDISMDVPDIFGSLDFFDYDLLFQN	970	15	LDISMDVPDIFGSLD	3.53743	4.22809
PUL4	P53749	90	169	HIYEKEAPKFDSDIDISRFGTNDAVIFNNDGWDTSLPIDFDFDEFNTETTDFDDFLKLLGDNSPSKEQKSLSYSPTATG	127	8	IDFDFDEF	3.89577	4.89297
PUL4	P53749	90	169	HIYEKEAPKFDSDIDISRFGTNDAVIFNNDGWDTSLPIDFDFDEFNTETTDFDDFLKLLGDNSPSKEQKSLSYSPTATG	140	9	DFDDFLKLL	4.05049	5.21146
PUL4	P53749	90	169	HIYEKEAPKFDSDIDISRFGTNDAVIFNNDGWDTSLPIDFDFDEFNTETTDFDDFLKLLGDNSPSKEQKSLSYSPTATG	108	18	FGTNDAVIFNNDGWDTSL	3.98448	5.07312
CRZ1	P53968	204	291	LYPQDLVSSPAMSHLTANNDDFDDLLSVASMNSNYLLPVNSHGYKHISNLDELDDLLSLTYSDNNLLSASNNSDFNNSNNGIINTAD	253	10	LDELDDLLSL	4.92426	7.44083
CRZ1	P53968	204	291	LYPQDLVSSPAMSHLTANNDDFDDLLSVASMNSNYLLPVNSHGYKHISNLDELDDLLSLTYSDNNLLSASNNSDFNNSNNGIINTAD	224	11	DFDDLLSVASM	3.1641	3.63131
FAP1	P53971	912	964	ERDMELLVGHFDFMAKEAFLADSISLCSTEEELERRLDTPVIQEDSPVMDNN	914	20	DMELLVGHFDFMAKEAFLAD	3.29323	3.82754
STP1	Q00947	405	480	SSSSESSAEVMFHGKQMKNFLIDINSFTNQQQQAQDNPSFLPLDIEQSSYDLSEDAMSYPIISTQSNRDCTQYDN	439	12	QDNPSFLPLDIE	3.24727	3.75651
SKO1	Q02100	452	505	YIKKIENDLQFYESEYDDLTQVIGKLCGIIPSSSSNSQFNVNVSTPSSSSPPS	459	12	DLQFYESEYDDL	3.53624	4.22604
TBF1	Q02457	305	354	DFDVNEFDPQVLFSTGTRTVEFMDDQNQPSSASAFLSTARPNHYSTHTP	306	14	FDVNEFDPQVLFST	3.10019	3.53795
RPN4	Q03465	142	204	SDPYVPTRNTFNYDVKISNDFFDNGDNLYGNDEEVLFYEDNYNPKMQWSLQDNSAAINNEDA	169	12	LYGNDEEVLFYE	3.23805	3.74242
WAR1	Q03631	895	943	NSADSTNIKPSPSSSVDNLNDYLTDINSLAWGVNSLNDEFWTDLFMND	933	7	EFWTDLF	3.36759	3.94532
WAR1	Q03631	895	943	NSADSTNIKPSPSSSVDNLNDYLTDINSLAWGVNSLNDEFWTDLFMND	915	12	DYLTDINSLAWG	3.14474	3.60277
ARO80	Q04052	858	949	DPFVEQNNDITTALLNNELFQGPSLSDEVTDWFGASEDIGLEFVEPWTELIEQRYMQCGDGDNNNFENLYNLFVNSNNINNDINNSRPITR	899	11	EFVEPWTELIE	3.5373	4.22788
ARO80	Q04052	858	949	DPFVEQNNDITTALLNNELFQGPSLSDEVTDWFGASEDIGLEFVEPWTELIEQRYMQCGDGDNNNFENLYNLFVNSNNINNDINNSRPITR	882	15	LSDEVTDWFGASEDI	3.49248	4.15134
ARO80	Q04052	858	949	DPFVEQNNDITTALLNNELFQGPSLSDEVTDWFGASEDIGLEFVEPWTELIEQRYMQCGDGDNNNFENLYNLFVNSNNINNDINNSRPITR	919	15	DNNNFENLYNLFVNS	3.09963	3.53714
ARO80	Q04052	459	521	ESNEDYLGNEKFYLNEILPDEESKLRWKRVFENSENDHDNEKNFLTDWEREFLNDEYVLYYS	509	10	EFLNDEYVLY	3.17373	3.64559
ARO80	Q04052	459	521	ESNEDYLGNEKFYLNEILPDEESKLRWKRVFENSENDHDNEKNFLTDWEREFLNDEYVLYYS	462	18	EDYLGNEKFYLNEILPDE	3.1334	3.58616
URC2	Q04411	711	771	KPATSPTNVGTLHENLSSSHFMIPDVDQFNSFEDFFQDFFDSLKPNSQKMFTSDKKTEQT	744	7	DFFQDFF	3.86832	4.83854
URC2	Q04411	711	771	KPATSPTNVGTLHENLSSSHFMIPDVDQFNSFEDFFQDFFDSLKPNSQKMFTSDKKTEQT	722	21	LHENLSSSHFMIPDVDQFNSF	3.58026	4.30254
TDA9	Q04545	438	491	IDHTDIHAHHADAHDDSFIESEEWLSKFIMDSQIDNDLKLNINHFNDIGFNNL	459	10	EEWLSKFIMD	4.51636	6.30116
TDA9	Q04545	258	324	QESIPHQVGFSTPQLTAQQLIENAIESGVVDLETLDLPPFLSLDGLPPASSSAAVAASEQIDICPS	290	12	ETLDLPPFLSLD	3.26637	3.78586
TDA9	Q04545	1151	1199	LSEREYKLQTFAEFLRVPDNGSLDIESLDSSLIENTLNSHDVTNQALD	1163	22	EFLRVPDNGSLDIESLDSSLIE	3.40403	4.00435
YLR278C	Q05854	1305	1340	VTNADIRKKRSNWDNMMTSGPVEDFWTINDDYGFL	1328	11	DFWTINDDYGF	4.61408	6.55719
ECM22	Q05958	649	698	DLGEAVINQSNHNNDNDNSNNGDGNNNNTISELVCFDESIADLYPVEID	680	16	ELVCFDESIADLYPVE	3.31397	3.86004
ARR1	Q06596	152	205	IGCTNLSNDIPGYSFLNDAMSEIHTFGDFNGELDSTFLEFSGTEIKEPNNFIT	180	12	FNGELDSTFLEF	4.50657	6.27606
ARR1	Q06596	152	205	IGCTNLSNDIPGYSFLNDAMSEIHTFGDFNGELDSTFLEFSGTEIKEPNNFIT	155	23	TNLSNDIPGYSFLNDAMSEIHTF	3.16417	3.63141
RDR1	Q08904	510	545	QQLEQATHQRSNLETTHLLDIDWDALLDPSDTLNF	530	8	IDWDALLD	4.04748	5.20508
AFT2	Q08957	363	415	NAPTADTDIATNLGKERNENFGMLNYNYEALLHFNDEHFNELNSIDPALISK	388	14	YNYEALLHFNDEHF	3.54261	4.23703
AFT2	Q08957	263	321	CVKIEKEDSLTNLNEIDFTNMFCNDNFIQNYNQGLMELLTEPTPGPSSSSCILPSTPT	278	12	IDFTNMFCNDNF	3.37321	3.95436
UPC2	Q12151	890	912	MMLDFLGGGLPSMTTTNFSDFS	890	21	MMLDFLGGGLPSMTTTNFSDF	3.1401	3.59596
YRR1	Q12172	757	809	MLPSPGETKNHAKSQSEIIQMLTDEFWANYNSGWEELINQSEFSTLFDDYKD	773	11	EIIQMLTDEFW	3.3241	3.87601
YRR1	Q12172	757	809	MLPSPGETKNHAKSQSEIIQMLTDEFWANYNSGWEELINQSEFSTLFDDYKD	794	13	INQSEFSTLFDDY	3.47513	4.12208
WTM2	Q12206	328	402	LTHRQNGEEPIQNEIAKLFHSGGDSVVDILFSQTSATEFVTVGGTGNVYHWDMEYSFSRNDDDNEDEVRVAAPE	370	15	GGTGNVYHWDMEYSF	3.35312	3.92212
WTM2	Q12206	328	402	LTHRQNGEEPIQNEIAKLFHSGGDSVVDILFSQTSATEFVTVGGTGNVYHWDMEYSFSRNDDDNEDEVRVAAPE	335	25	EEPIQNEIAKLFHSGGDSVVDILFS	3.30027	3.83854
YLL054C	Q12244	777	842	SLDLEILEELEKLISAQEFSRNFTEDVDESLQSEIDLMNYDNEALNQLMAIDLDKLLGIFPNLSN	778	9	LDLEILEEL	3.7376	4.58749
YLL054C	Q12244	777	842	SLDLEILEELEKLISAQEFSRNFTEDVDESLQSEIDLMNYDNEALNQLMAIDLDKLLGIFPNLSN	825	13	MAIDLDKLLGIFP	3.14906	3.60912
YLL054C	Q12244	777	842	SLDLEILEELEKLISAQEFSRNFTEDVDESLQSEIDLMNYDNEALNQLMAIDLDKLLGIFPNLSN	803	19	VDESLQSEIDLMNYDNEAL	3.71927	4.55335
YRM1	Q12340	737	785	SENASHNNETGPIETELAQTISNEFWTAYNLGWEELMSQPDYKYLFDT	760	11	EFWTAYNLGWE	3.72964	4.57263
YRM1	Q12340	184	241	PLEKTGSDILQQVCNVLPSFEQSSKIITDFFNTELETNEVSEVLDKTKIINDFTSSF	212	17	DFFNTELETNEVSEVLD	3.22264	3.71899
HAA1	Q12753	658	693	DLPDTSPMSSIQTASPPSQLLTDQGFADLDNFMSS	677	14	LLTDQGFADLDNFM	3.66165	4.44767
HAA1	Q12753	274	335	NSRVGEVSVPLEEYIPSDIDGVGRVTDKSSLVYDWPFDESIERNFSTTATAATGESKFDIN	304	8	LVYDWPFD	3.15441	3.617
HAA1	Q12753	167	228	GKISKDYHHVPSLASISSLQSSQSLDQNFSIPQSPPLSSMSFNFLTGNINETNQNHSNHQH	189	29	QSLDQNFSIPQSPPLSSMSFNFLTGNINE	3.26626	3.7857

## Sheet: PADDLE test set predictions
	protein sequence	protein	protein ID	position	activation	Z score	predicted activation	predicted Z score
A_nonnuclear_P09937:259	SHQVVGIAKLPIAYGYHTNSVYNKNLDKQADLKMKNVLRGTWDTITDLEREIW				1.84703	1.50546	1.17926	0.404552
A_nonnuclear_P0CX15:650	HDPWMDVVGFEDPDQVTNRDISRIVLYSYMFLNTAKGCLVEYATFRQYMRELP				1.03703	0.0892191	1.033	0.0796714
A_nonnuclear_P0CX15:819	SRVTRKRPREPKSTNDILVAGQKLFGSSFEFRDLHQLRLCHEIYMADTPSVAV				1.08209	0.193568	1.07335	0.173667
A_nonnuclear_P25380:179	MDSQNIEIIKDIVISDTSLANIENFNKVQEIDTFNINNNRFLETIHSNVKTIR				1.52157	1.02987	1.5394	1.05844
A_nonnuclear_P34761:129	SIELQKKNSSSSITSASLEDENDIFIIARFELLNLAINYAVILNSKNELFGPS				1.01319	0.0321601	0.980417	-0.0485238
A_nonnuclear_P38870:616	SLTSLCEQFPTSSLRFLQELANHFQLINSKYSLPPQTIQDLFRDNSDIDIPLA				1.13858	0.31843	1.15537	0.354339
A_nonnuclear_P48415:389	NDFTGKNIENESQKLMGEGNHKLPLSAEADIIEPGKDIQDQAEDLFTQSSGDL				1.22728	0.502482	1.51815	1.02435
A_nonnuclear_Q05902:478	HGNAVSLTTTINLLFGSLVHDPKTGVIFNNEMDDFAQFNKSNSFELAPSIYNF				1.4338	0.88408	1.44955	0.910901
A_nonnuclear_Q12325:78	SDVSLYDNSVSQFEETTVSLKEYYDHSIRSHLTVKGACSYLKSVFPIINWLPH				1.0411	0.0988195	1.07219	0.171021
A_nonnuclear_Q12482:605	TVNDFMRNRLTDKNGKLSLFPEIISGASAGACQVIFTNPLEIVKIRLQVQSDY				1.02893	0.0699626	1.01539	0.0374824
A_nonnuclear_Q99296:536	DVAHPYKRRCSFRVRRVSTSAPTADYSNNNVNASLGTPAADSIATSSSNSAPQ				1.04992	0.119524	1.00453	0.0110945
A_random_11	FFFVFKIKYENKPFNLGLFKLDPQLSQPLNRLRNMLTDIIKVQLDRAPKDLIS				0.984094	-0.0393401	0.954025	-0.115477
A_random_12	LKSSPGSQVTSGYARNKVRSIIDNEETQGSAYEDHISLGYVFNTALEESLPFM				2.8994	2.61183	2.22647	1.96387
A_random_23	EQPIGGPSKTKNAVLNGKYGSIFNDLLSRTDLEDQPWQSRIFLEVEFKKKEAL				1.25396	0.55526	1.3637	0.761107
A_random_28	MACPASELVSNASEYRKVKASSAAKKSIAAPFECIVKKKPNKAVVERESIEIT				0.948389	-0.130017	0.953116	-0.117816
A_random_29	TDKPETQQSFKSKNSEKEKIDSDHAKVTSIPGIFANTYNSIPRDLHEGFKSKG				1.06087	0.14498	1.04524	0.10856
A_random_3	ILHMYDTGVEFHVFDLSKARQPLGPNVQNRLLTNSFTIAIDVNFYAFTVRSTV				0.964698	-0.0881814	1.02941	0.0711099
A_random_32	AIRKFDLVYPLNTSALFWSTLQGEPKGKADYLYQRKLYQGAPINSFKIVWGAL				0.962113	-0.0947661	0.970731	-0.0728858
A_random_39	AIFAPSNFYVPNSSIEKIPAILNLTSEKNLYIQSKGLSNDLTPATFLKPAGYE				1.33254	0.704389	1.11944	0.276841
A_random_42	CKFLSSFYNFFKPSSSKKNVKLIKSLTEPMKGHPKNLPCMPFRGVITREPEYP				0.955749	-0.111049	0.96999	-0.0747601
A_random_5	FKDDEITSSTKVRLSSDEIILIGDFAAYKPNTDSETKSASVTPGKEKIGNDNC				1.50065	0.995902	1.26596	0.578623
A_tiles_P05085:0	MGISSKNGPKKMGRAKTFTGCWTCRGRKVKCDLRHPHCQRCEKSNLPCGGYDI	ARG81	P05085	0	1.13565	0.312103	1.01664	0.0404793
A_tiles_P05085:103	YVYHEDMDDELTMLHTPPIEKISDNKTWIIKKFGVFKGTDKIDKQYAPRKKRN	ARG81	P05085	103	1.49744	0.99064	1.57519	1.11484
A_tiles_P05085:116	LHTPPIEKISDNKTWIIKKFGVFKGTDKIDKQYAPRKKRNRKRVAKSLESSAS	ARG81	P05085	116	0.873345	-0.332272	0.967252	-0.0816958
A_tiles_P05085:129	TWIIKKFGVFKGTDKIDKQYAPRKKRNRKRVAKSLESSASISLSSLPSSSTIS	ARG81	P05085	129	0.867038	-0.350056	0.98091	-0.0472909
A_tiles_P05085:13	RAKTFTGCWTCRGRKVKCDLRHPHCQRCEKSNLPCGGYDIKLRWSKPMQFDPY	ARG81	P05085	13	1.30545	0.653993	1.08193	0.193205
A_tiles_P05085:142	DKIDKQYAPRKKRNRKRVAKSLESSASISLSSLPSSSTISFPIRHIEDKLRNK	ARG81	P05085	142	0.843819	-0.416656	0.986361	-0.0336937
A_tiles_P05085:155	NRKRVAKSLESSASISLSSLPSSSTISFPIRHIEDKLRNKGHVKTGILSANDG	ARG81	P05085	155	0.78668	-0.588694	0.951151	-0.122882
A_tiles_P05085:168	SISLSSLPSSSTISFPIRHIEDKLRNKGHVKTGILSANDGVPPTPNLLDYDWN	ARG81	P05085	168	1.5669	1.1019	1.61994	1.18357
A_tiles_P05085:181	SFPIRHIEDKLRNKGHVKTGILSANDGVPPTPNLLDYDWNNLNITGYEWISSE	ARG81	P05085	181	18.702	7.18559	12.9953	6.29239
A_tiles_P05085:194	KGHVKTGILSANDGVPPTPNLLDYDWNNLNITGYEWISSELRDDALLSAVTLQ	ARG81	P05085	194	32.0701	8.50877	12.337	6.16483
A_tiles_P05085:220	NNLNITGYEWISSELRDDALLSAVTLQGHHLGHTQPQEISLEENSNVVSGEEH	ARG81	P05085	220	18.4021	7.14592	5.16452	4.02829
A_tiles_P05085:233	ELRDDALLSAVTLQGHHLGHTQPQEISLEENSNVVSGEEHVNAKEHGCAFEAD	ARG81	P05085	233	1.66148	1.2457	1.46825	0.942349
A_tiles_P05085:246	QGHHLGHTQPQEISLEENSNVVSGEEHVNAKEHGCAFEADNQGSSTLPNKAAS	ARG81	P05085	246	1.1471	0.336713	1.02446	0.0592891
A_tiles_P05085:258	ISLEENSNVVSGEEHVNAKEHGCAFEADNQGSSTLPNKAASANDKLYQQNLKL	ARG81	P05085	258	1.30382	0.650927	1.05262	0.125814
A_tiles_P05085:26	RKVKCDLRHPHCQRCEKSNLPCGGYDIKLRWSKPMQFDPYGVPIPQNSPATTT	ARG81	P05085	26	1.15691	0.357616	1.18377	0.413925
A_tiles_P05085:271	EHVNAKEHGCAFEADNQGSSTLPNKAASANDKLYQQNLKLLFQKNSSNSEEPD	ARG81	P05085	271	1.01601	0.0389786	1.01494	0.0363742
A_tiles_P05085:284	ADNQGSSTLPNKAASANDKLYQQNLKLLFQKNSSNSEEPDPQALIDDVFVNIE	ARG81	P05085	284	2.57158	2.31745	1.72499	1.33774
A_tiles_P05085:297	ASANDKLYQQNLKLLFQKNSSNSEEPDPQALIDDVFVNIEPRSLPASDLNKIT	ARG81	P05085	297	1.82076	1.47031	2.17586	1.90746
A_tiles_P05085:310	LLFQKNSSNSEEPDPQALIDDVFVNIEPRSLPASDLNKITLAPPNEESRMPKS	ARG81	P05085	310	1.66445	1.25007	1.9552	1.64509
A_tiles_P05085:323	DPQALIDDVFVNIEPRSLPASDLNKITLAPPNEESRMPKSMLELTSYSSDLPP	ARG81	P05085	323	2.79555	2.52234	2.98301	2.68158
A_tiles_P05085:336	EPRSLPASDLNKITLAPPNEESRMPKSMLELTSYSSDLPPELVDIIPKTDLTV	ARG81	P05085	336	1.71139	1.31831	1.36497	0.763386
A_tiles_P05085:349	TLAPPNEESRMPKSMLELTSYSSDLPPELVDIIPKTDLTVHGLARFLLNHYFN	ARG81	P05085	349	1.36393	0.761518	1.18497	0.416423
A_tiles_P05085:362	SMLELTSYSSDLPPELVDIIPKTDLTVHGLARFLLNHYFNNVADKMTVVVLEK	ARG81	P05085	362	1.03848	0.0926444	1.02298	0.0557405
A_tiles_P05085:375	PELVDIIPKTDLTVHGLARFLLNHYFNNVADKMTVVVLEKNPWKTLYFPRALM	ARG81	P05085	375	1.01502	0.0365902	0.991397	-0.0211997
A_tiles_P05085:39	RCEKSNLPCGGYDIKLRWSKPMQFDPYGVPIPQNSPATTTNLSGSVDEPQYQR	ARG81	P05085	39	1.22685	0.501634	1.32124	0.683482
A_tiles_P05085:401	NNVADKMTVVVLEKNPWKTLYFPRALMALGDLAGLGQSSNSRNALLNALLAVS	ARG81	P05085	401	0.977471	-0.0559081	0.976113	-0.0593193
A_tiles_P05085:414	KNPWKTLYFPRALMALGDLAGLGQSSNSRNALLNALLAVSCFHLQSKYPRNYK	ARG81	P05085	414	1.06697	0.159058	0.965137	-0.0870645
A_tiles_P05085:426	LMALGDLAGLGQSSNSRNALLNALLAVSCFHLQSKYPRNYKLQKYFLGLGIEL	ARG81	P05085	426	1.06278	0.149399	0.988274	-0.0289403
A_tiles_P05085:439	SNSRNALLNALLAVSCFHLQSKYPRNYKLQKYFLGLGIELRNQASNFLRLCLN	ARG81	P05085	439	0.995392	-0.0113322	0.996342	-0.00899203
A_tiles_P05085:452	VSCFHLQSKYPRNYKLQKYFLGLGIELRNQASNFLRLCLNTKSSIPEKYKDVL	ARG81	P05085	452	0.903372	-0.249334	0.96613	-0.0845423
A_tiles_P05085:465	YKLQKYFLGLGIELRNQASNFLRLCLNTKSSIPEKYKDVLTAILSMNSIDVVW	ARG81	P05085	465	1.02419	0.0586533	0.975684	-0.0603992
A_tiles_P05085:478	LRNQASNFLRLCLNTKSSIPEKYKDVLTAILSMNSIDVVWGTMADCQDHLALC	ARG81	P05085	478	1.03771	0.0908198	0.977938	-0.0547358
A_tiles_P05085:491	NTKSSIPEKYKDVLTAILSMNSIDVVWGTMADCQDHLALCEDFVESRMKLRPN	ARG81	P05085	491	1.2189	0.485688	1.44954	0.910869
A_tiles_P05085:504	LTAILSMNSIDVVWGTMADCQDHLALCEDFVESRMKLRPNISEKTKTLHRIFS	ARG81	P05085	504	1.23445	0.516788	1.02535	0.0614205
A_tiles_P05085:517	WGTMADCQDHLALCEDFVESRMKLRPNISEKTKTLHRIFSFLKLIQDSTALDK	ARG81	P05085	517	1.00119	0.00291076	1.01664	0.0404975
A_tiles_P05085:52	IKLRWSKPMQFDPYGVPIPQNSPATTTNLSGSVDEPQYQRRNIDFVRYDEEYV	ARG81	P05085	52	1.19968	0.44669	1.47075	0.946522
A_tiles_P05085:530	CEDFVESRMKLRPNISEKTKTLHRIFSFLKLIQDSTALDKVRAKEIVILPSEE	ARG81	P05085	530	0.912988	-0.223353	0.9808	-0.0475675
A_tiles_P05085:543	NISEKTKTLHRIFSFLKLIQDSTALDKVRAKEIVILPSEEDDNYKPLDTSNAT	ARG81	P05085	543	1.15798	0.359872	0.982564	-0.0431578
A_tiles_P05085:556	SFLKLIQDSTALDKVRAKEIVILPSEEDDNYKPLDTSNATTSSSEPRVDVVQE	ARG81	P05085	556	1.2255	0.498931	1.06712	0.159388
A_tiles_P05085:569	KVRAKEIVILPSEEDDNYKPLDTSNATTSSSEPRVDVVQEGLFREALNENDGK	ARG81	P05085	569	1.8882	1.55955	1.08347	0.196698
A_tiles_P05085:581	EEDDNYKPLDTSNATTSSSEPRVDVVQEGLFREALNENDGKIHIEFVKEPITN	ARG81	P05085	581	1.5902	1.13811	1.4134	0.848922
A_tiles_P05085:594	ATTSSSEPRVDVVQEGLFREALNENDGKIHIEFVKEPITNVSADSTPSSTTPP	ARG81	P05085	594	1.02255	0.0547239	1.16504	0.374789
A_tiles_P05085:607	QEGLFREALNENDGKIHIEFVKEPITNVSADSTPSSTTPPIFTNIATESYYNK	ARG81	P05085	607	1.15447	0.352432	1.2982	0.640325
A_tiles_P05085:620	GKIHIEFVKEPITNVSADSTPSSTTPPIFTNIATESYYNKSDISKLVSKTDEN	ARG81	P05085	620	0.846139	-0.409921	1.1264	0.292042
A_tiles_P05085:633	NVSADSTPSSTTPPIFTNIATESYYNKSDISKLVSKTDENIIGTDSLYGLPNS	ARG81	P05085	633	1.10448	0.243817	1.90759	1.58461
A_tiles_P05085:646	PIFTNIATESYYNKSDISKLVSKTDENIIGTDSLYGLPNSLILLFSDCVRIVR	ARG81	P05085	646	1.03562	0.085877	1.05389	0.128794
A_tiles_P05085:65	YGVPIPQNSPATTTNLSGSVDEPQYQRRNIDFVRYDEEYVYHEDMDDELTMLH	ARG81	P05085	65	13.3912	6.36601	4.72771	3.81147
A_tiles_P05085:659	KSDISKLVSKTDENIIGTDSLYGLPNSLILLFSDCVRIVRHNEYYNLTYLPVP	ARG81	P05085	659	0.909661	-0.232313	0.990014	-0.0246234
A_tiles_P05085:672	NIIGTDSLYGLPNSLILLFSDCVRIVRHNEYYNLTYLPVPRKFNELSLNFEKR	ARG81	P05085	672	1.00841	0.0205412	0.975803	-0.0600984
A_tiles_P05085:685	SLILLFSDCVRIVRHNEYYNLTYLPVPRKFNELSLNFEKRLLKWKSEWNFHQE	ARG81	P05085	685	0.878695	-0.317287	0.979036	-0.0519836
A_tiles_P05085:698	RHNEYYNLTYLPVPRKFNELSLNFEKRLLKWKSEWNFHQENSEGKSFINSTAE	ARG81	P05085	698	1.00008	0.000196009	1.05465	0.130544
A_tiles_P05085:711	PRKFNELSLNFEKRLLKWKSEWNFHQENSEGKSFINSTAEALYHHTMSFYFSL	ARG81	P05085	711	0.956237	-0.109795	0.986725	-0.0327899
A_tiles_P05085:724	RLLKWKSEWNFHQENSEGKSFINSTAEALYHHTMSFYFSLIIYYFTMARSLNC	ARG81	P05085	724	0.945424	-0.137698	0.981574	-0.0456306
A_tiles_P05085:737	ENSEGKSFINSTAEALYHHTMSFYFSLIIYYFTMARSLNCQFLQNYVAKVLDH	ARG81	P05085	737	1.04419	0.106094	0.980042	-0.0494625
A_tiles_P05085:749	AEALYHHTMSFYFSLIIYYFTMARSLNCQFLQNYVAKVLDHLNAMEELVDQKK	ARG81	P05085	749	1.00292	0.00715044	0.972416	-0.0686306
A_tiles_P05085:762	SLIIYYFTMARSLNCQFLQNYVAKVLDHLNAMEELVDQKKVKIVPLIWQGFMA	ARG81	P05085	762	1.00793	0.0193903	0.979192	-0.0515919
A_tiles_P05085:775	NCQFLQNYVAKVLDHLNAMEELVDQKKVKIVPLIWQGFMAGCACTDENRQQEF	ARG81	P05085	775	1.13612	0.313118	0.991506	-0.0209291
A_tiles_P05085:78	TNLSGSVDEPQYQRRNIDFVRYDEEYVYHEDMDDELTMLHTPPIEKISDNKTW	ARG81	P05085	78	5.99783	4.39531	6.77738	4.69512
A_tiles_P05085:788	DHLNAMEELVDQKKVKIVPLIWQGFMAGCACTDENRQQEFRRWAAKLAESGVG	ARG81	P05085	788	1.05097	0.121972	1.02679	0.0648701
A_tiles_P05085:801	KVKIVPLIWQGFMAGCACTDENRQQEFRRWAAKLAESGVGSYWGARQVMLEVW	ARG81	P05085	801	0.951591	-0.121745	0.976119	-0.0593054
A_tiles_P05085:814	AGCACTDENRQQEFRRWAAKLAESGVGSYWGARQVMLEVWRRRKEDEPGDNWY	ARG81	P05085	814	1.10385	0.242426	1.06009	0.14318
A_tiles_P05085:827	FRRWAAKLAESGVGSYWGARQVMLEVWRRRKEDEPGDNWYSVYKDWEMNLMLS	ARG81	P05085	827	0.979736	-0.0502303	1.00814	0.0198987
A_tiles_P05085:90	QRRNIDFVRYDEEYVYHEDMDDELTMLHTPPIEKISDNKTWIIKKFGVFKGTD	ARG81	P05085	90	1.48708	0.973616	2.77838	2.50722
A_tiles_P07249:0	MTSNSDGSSTSPVEKPITGDVETNEPTKPIRRLSTPSPEQDQEGDFDEEDDDD	ARG80	P07249	0	1.02109	0.0512135	0.957544	-0.106445
A_tiles_P07249:112	SVLTGANILLLILANSGLVYTFTTPKLEPVVREDEGKSLIRACINASDTPDAT	ARG80	P07249	112	0.998486	-0.00371658	0.953664	-0.116405
A_tiles_P07249:12	VEKPITGDVETNEPTKPIRRLSTPSPEQDQEGDFDEEDDDDKFSVSTSTPTPT	ARG80	P07249	12	0.791152	-0.574784	0.983475	-0.0408837
A_tiles_P07249:124	LANSGLVYTFTTPKLEPVVREDEGKSLIRACINASDTPDATDTSPAQEQSPAN	ARG80	P07249	124	0.863144	-0.361102	0.977497	-0.0558434
A_tiles_P07249:25	PTKPIRRLSTPSPEQDQEGDFDEEDDDDKFSVSTSTPTPTITKTKDSSDTSTV	ARG80	P07249	25	0.817982	-0.492958	0.954763	-0.11358
A_tiles_P07249:37	PEQDQEGDFDEEDDDDKFSVSTSTPTPTITKTKDSSDTSTVTRRKQPIRYIEN	ARG80	P07249	37	0.887035	-0.29411	0.966913	-0.0825551
A_tiles_P07249:50	DDDKFSVSTSTPTPTITKTKDSSDTSTVTRRKQPIRYIENKTRRHVTFSKRRH	ARG80	P07249	50	1.10194	0.238164	0.967902	-0.080046
A_tiles_P07249:62	TPTITKTKDSSDTSTVTRRKQPIRYIENKTRRHVTFSKRRHGIMKKAYELSVL	ARG80	P07249	62	0.973183	-0.0666944	0.962674	-0.0933339
A_tiles_P07249:74	TSTVTRRKQPIRYIENKTRRHVTFSKRRHGIMKKAYELSVLTGANILLLILAN	ARG80	P07249	74	1.13819	0.317586	0.976725	-0.0577817
A_tiles_P07249:87	IENKTRRHVTFSKRRHGIMKKAYELSVLTGANILLLILANSGLVYTFTTPKLE	ARG80	P07249	87	0.975423	-0.0610548	0.969538	-0.0759022
A_tiles_P07249:99	KRRHGIMKKAYELSVLTGANILLLILANSGLVYTFTTPKLEPVVREDEGKSLI	ARG80	P07249	99	0.964201	-0.0894468	0.963482	-0.091277
A_tiles_P15315:0	MVVINGVKYACETCIRGHRAAQCTHTDGPLQMIRRKGRPSTTCGHCKELRRTK	CUP2	P15315	0	1.04458	0.107002	0.955317	-0.112156
A_tiles_P15315:111	EAAHVNGLGIADLDVLLGLNGRSSDVDMTTTLPSLKPPLQNGEIKADSIDNLD	CUP2	P15315	111	11.4429	5.98025	4.39546	3.63268
A_tiles_P15315:12	TCIRGHRAAQCTHTDGPLQMIRRKGRPSTTCGHCKELRRTKNFNPSGGCMCAS	CUP2	P15315	12	1.04954	0.118641	0.979067	-0.0519048
A_tiles_P15315:123	LDVLLGLNGRSSDVDMTTTLPSLKPPLQNGEIKADSIDNLDLASLDPLEQSPS	CUP2	P15315	123	1.58372	1.1281	1.68898	1.28597
A_tiles_P15315:135	DVDMTTTLPSLKPPLQNGEIKADSIDNLDLASLDPLEQSPSISMEPVSINETG	CUP2	P15315	135	1.7134	1.32119	2.39982	2.14783
A_tiles_P15315:147	PPLQNGEIKADSIDNLDLASLDPLEQSPSISMEPVSINETGSAYTTTNTALND	CUP2	P15315	147	2.80501	2.53062	2.35886	2.1056
A_tiles_P15315:160	DNLDLASLDPLEQSPSISMEPVSINETGSAYTTTNTALNDIDIPFSINELNEL	CUP2	P15315	160	50.3064	9.61339	24.8773	7.88564
A_tiles_P15315:172	QSPSISMEPVSINETGSAYTTTNTALNDIDIPFSINELNELYKQVSSHNSHSQ	CUP2	P15315	172	67.216	10.3244	7.57077	4.96674
A_tiles_P15315:25	TDGPLQMIRRKGRPSTTCGHCKELRRTKNFNPSGGCMCASARRPAVGSKEDET	CUP2	P15315	25	0.883614	-0.303591	0.949941	-0.126005
A_tiles_P15315:37	RPSTTCGHCKELRRTKNFNPSGGCMCASARRPAVGSKEDETRCRCDEGEPCKC	CUP2	P15315	37	1.0737	0.174468	1.01728	0.0420254
A_tiles_P15315:49	RRTKNFNPSGGCMCASARRPAVGSKEDETRCRCDEGEPCKCHTKRKSSRKSKG	CUP2	P15315	49	0.992403	-0.0187106	0.981164	-0.0466551
A_tiles_P15315:61	MCASARRPAVGSKEDETRCRCDEGEPCKCHTKRKSSRKSKGGSCHRRANDEAA	CUP2	P15315	61	0.986695	-0.0328639	0.999699	-0.000738215
A_tiles_P15315:74	EDETRCRCDEGEPCKCHTKRKSSRKSKGGSCHRRANDEAAHVNGLGIADLDVL	CUP2	P15315	74	1.18328	0.412904	1.2067	0.460998
A_tiles_P15315:86	PCKCHTKRKSSRKSKGGSCHRRANDEAAHVNGLGIADLDVLLGLNGRSSDVDM	CUP2	P15315	86	6.27808	4.50735	5.03439	3.96568
A_tiles_P15315:98	KSKGGSCHRRANDEAAHVNGLGIADLDVLLGLNGRSSDVDMTTTLPSLKPPLQ	CUP2	P15315	98	2.72809	2.4624	3.67001	3.19011
A_tiles_P19541:0	MSANSGVKRASKAFKTCLFCKRSHVVCDKQRPCSRCVKRDIAHLCREDDIAVP	RDS2	P19541	0	1.133	0.306379	0.973416	-0.0661086
A_tiles_P19541:101	SPKLDSSLVNDTTSLLLPQQPVFVSENVGSEFSSLNEFLSMLENPLLTQTSLS	RDS2	P19541	101	32.3431	8.52957	3.41046	3.01015
A_tiles_P19541:114	SLLLPQQPVFVSENVGSEFSSLNEFLSMLENPLLTQTSLSSSSASNVHLENGS	RDS2	P19541	114	33.499	8.61573	3.48375	3.06232
A_tiles_P19541:127	NVGSEFSSLNEFLSMLENPLLTQTSLSSSSASNVHLENGSQTTQSPLEYQNDN	RDS2	P19541	127	23.7441	7.77126	5.69169	4.26676
A_tiles_P19541:13	FKTCLFCKRSHVVCDKQRPCSRCVKRDIAHLCREDDIAVPNEMPSQHESSPND	RDS2	P19541	13	1.07972	0.188201	0.987845	-0.0300048
A_tiles_P19541:139	LSMLENPLLTQTSLSSSSASNVHLENGSQTTQSPLEYQNDNRRDEIGVARQEN	RDS2	P19541	139	1.04527	0.108626	1.11652	0.27043
A_tiles_P19541:152	LSSSSASNVHLENGSQTTQSPLEYQNDNRRDEIGVARQENRSPTIMSGSSNSI	RDS2	P19541	152	1.02234	0.0542136	1.00878	0.0214588
A_tiles_P19541:165	GSQTTQSPLEYQNDNRRDEIGVARQENRSPTIMSGSSNSISKGDKQDQEKEES	RDS2	P19541	165	0.874403	-0.329303	0.949923	-0.126051
A_tiles_P19541:177	NDNRRDEIGVARQENRSPTIMSGSSNSISKGDKQDQEKEESRILANANENSAP	RDS2	P19541	177	0.821568	-0.482225	0.933266	-0.169454
A_tiles_P19541:190	ENRSPTIMSGSSNSISKGDKQDQEKEESRILANANENSAPTPKEQFFLTAADP	RDS2	P19541	190	0.932296	-0.172006	0.974924	-0.0623103
A_tiles_P19541:203	SISKGDKQDQEKEESRILANANENSAPTPKEQFFLTAADPSTEMTPEHRLKLV	RDS2	P19541	203	1.10028	0.234475	0.988049	-0.029498
A_tiles_P19541:216	ESRILANANENSAPTPKEQFFLTAADPSTEMTPEHRLKLVINAKLEAGLLKPY	RDS2	P19541	216	1.02808	0.0679472	1.04762	0.114137
A_tiles_P19541:228	APTPKEQFFLTAADPSTEMTPEHRLKLVINAKLEAGLLKPYNYAKGYARLQDY	RDS2	P19541	228	1.16522	0.375182	1.03114	0.0752419
A_tiles_P19541:241	DPSTEMTPEHRLKLVINAKLEAGLLKPYNYAKGYARLQDYMDKYMNQSSKQRI	RDS2	P19541	241	1.84636	1.50457	1.0426	0.102347
A_tiles_P19541:25	VCDKQRPCSRCVKRDIAHLCREDDIAVPNEMPSQHESSPNDNNIQGKYANKAH	RDS2	P19541	25	1.03765	0.0906874	1.01414	0.0344612
A_tiles_P19541:254	LVINAKLEAGLLKPYNYAKGYARLQDYMDKYMNQSSKQRILKPLSTIRPAFRT	RDS2	P19541	254	0.996942	-0.00751415	0.964762	-0.0880183
A_tiles_P19541:266	KPYNYAKGYARLQDYMDKYMNQSSKQRILKPLSTIRPAFRTIARSLKDVDLVL	RDS2	P19541	266	0.851707	-0.393827	0.975175	-0.061678
A_tiles_P19541:279	DYMDKYMNQSSKQRILKPLSTIRPAFRTIARSLKDVDLVLVEESFERMLLSYD	RDS2	P19541	279	1.08773	0.206337	1.00878	0.0214408
A_tiles_P19541:292	RILKPLSTIRPAFRTIARSLKDVDLVLVEESFERMLLSYDRVFTSMSMPACLC	RDS2	P19541	292	0.900687	-0.256637	0.981951	-0.0446894
A_tiles_P19541:304	FRTIARSLKDVDLVLVEESFERMLLSYDRVFTSMSMPACLCRRTGEIYRANKE	RDS2	P19541	304	0.974351	-0.0637532	0.980911	-0.0472896
A_tiles_P19541:317	VLVEESFERMLLSYDRVFTSMSMPACLCRRTGEIYRANKEFASLVDCTVDDLR	RDS2	P19541	317	1.15655	0.356845	1.02407	0.0583641
A_tiles_P19541:330	YDRVFTSMSMPACLCRRTGEIYRANKEFASLVDCTVDDLRDGKLAIYELMTEE	RDS2	P19541	330	1.43673	0.889102	1.22726	0.502455
A_tiles_P19541:355	KEFASLVDCTVDDLRDGKLAIYELMTEESAVNFWEKYGSIAFDKGQKAVLTSC	RDS2	P19541	355	1.83313	1.48692	1.43105	0.879384
A_tiles_P19541:368	LRDGKLAIYELMTEESAVNFWEKYGSIAFDKGQKAVLTSCSLRTKDGIRKRPC	RDS2	P19541	368	0.949215	-0.127879	1.00886	0.021653
A_tiles_P19541:38	RDIAHLCREDDIAVPNEMPSQHESSPNDNNIQGKYANKAHTGIPSDYQNEPVN	RDS2	P19541	38	1.00009	0.000219728	1.06938	0.164573
A_tiles_P19541:380	TEESAVNFWEKYGSIAFDKGQKAVLTSCSLRTKDGIRKRPCCFSFTIRRDRYN	RDS2	P19541	380	1.00758	0.0185216	1.03577	0.0862305
A_tiles_P19541:393	SIAFDKGQKAVLTSCSLRTKDGIRKRPCCFSFTIRRDRYNIPICIVGNFIPLS	RDS2	P19541	393	0.989344	-0.0262864	0.985144	-0.0367225
A_tiles_P19541:51	VPNEMPSQHESSPNDNNIQGKYANKAHTGIPSDYQNEPVNKSGSTYGEELSPK	RDS2	P19541	51	0.947643	-0.131946	1.03162	0.076383
A_tiles_P19541:63	PNDNNIQGKYANKAHTGIPSDYQNEPVNKSGSTYGEELSPKLDSSLVNDTTSL	RDS2	P19541	63	1.01238	0.0301942	1.08408	0.19808
A_tiles_P19541:76	AHTGIPSDYQNEPVNKSGSTYGEELSPKLDSSLVNDTTSLLLPQQPVFVSENV	RDS2	P19541	76	1.59977	1.15284	1.35295	0.741687
A_tiles_P19541:89	VNKSGSTYGEELSPKLDSSLVNDTTSLLLPQQPVFVSENVGSEFSSLNEFLSM	RDS2	P19541	89	13.7132	6.42431	5.07889	3.98727
A_tiles_P25611:0	MDSITVKKPRLRLVCLQCKKIKRKCDKLRPACSRCQQNSLQCEYEERTDLSAN	RDS1	P25611	0	1.02782	0.0673228	0.971257	-0.0715552
A_tiles_P25611:104	LVIVGLVTFLDYPFAAHSLAQHDQYIRALCASLYGMALVDFSNYANGIPCEDT	RDS1	P25611	104	0.994967	-0.01238	0.99422	-0.014222
A_tiles_P25611:117	FAAHSLAQHDQYIRALCASLYGMALVDFSNYANGIPCEDTSRSILGPLSFIEK	RDS1	P25611	117	0.882925	-0.305507	0.990644	-0.0230646
A_tiles_P25611:13	VCLQCKKIKRKCDKLRPACSRCQQNSLQCEYEERTDLSANVAANDSDGFNSSH	RDS1	P25611	13	1.00584	0.014292	0.970624	-0.0731558
A_tiles_P25611:130	RALCASLYGMALVDFSNYANGIPCEDTSRSILGPLSFIEKAIFRRIEHSKQFR	RDS1	P25611	130	0.904913	-0.245152	0.976295	-0.0588626
A_tiles_P25611:143	DFSNYANGIPCEDTSRSILGPLSFIEKAIFRRIEHSKQFRVQSAALGLLYNAF	RDS1	P25611	143	0.97764	-0.0554849	0.989203	-0.0266353
A_tiles_P25611:156	TSRSILGPLSFIEKAIFRRIEHSKQFRVQSAALGLLYNAFSMEEENFSTLLPS	RDS1	P25611	156	1.02855	0.0690653	0.970859	-0.0725613
A_tiles_P25611:169	KAIFRRIEHSKQFRVQSAALGLLYNAFSMEEENFSTLLPSLIAEVEDVLMQKK	RDS1	P25611	169	1.06445	0.153237	0.973329	-0.0663277
A_tiles_P25611:182	RVQSAALGLLYNAFSMEEENFSTLLPSLIAEVEDVLMQKKDCEILLRCFYQNI	RDS1	P25611	182	0.994706	-0.0130225	0.974794	-0.0626376
A_tiles_P25611:195	FSMEEENFSTLLPSLIAEVEDVLMQKKDCEILLRCFYQNIYPFYPFMDISLFE	RDS1	P25611	195	1.27211	0.590518	1.01949	0.0473556
A_tiles_P25611:208	SLIAEVEDVLMQKKDCEILLRCFYQNIYPFYPFMDISLFESDLTSLLLQDDNN	RDS1	P25611	208	1.75062	1.37392	1.44349	0.900622
A_tiles_P25611:221	KDCEILLRCFYQNIYPFYPFMDISLFESDLTSLLLQDDNNRWKISTEVKNVRK	RDS1	P25611	221	1.27678	0.599508	1.04369	0.104927
A_tiles_P25611:234	IYPFYPFMDISLFESDLTSLLLQDDNNRWKISTEVKNVRKKIETLSLLTIVMA	RDS1	P25611	234	1.15651	0.356767	1.02986	0.0721867
A_tiles_P25611:247	ESDLTSLLLQDDNNRWKISTEVKNVRKKIETLSLLTIVMAMALMHSKLDANLL	RDS1	P25611	247	0.972653	-0.0680315	0.997351	-0.00650895
A_tiles_P25611:26	KLRPACSRCQQNSLQCEYEERTDLSANVAANDSDGFNSSHKLNFEQQPVLERT	RDS1	P25611	26	1.09885	0.231292	1.04719	0.113146
A_tiles_P25611:260	NRWKISTEVKNVRKKIETLSLLTIVMAMALMHSKLDANLLSMVKENASESARK	RDS1	P25611	260	0.908698	-0.234911	0.959925	-0.100351
A_tiles_P25611:273	KKIETLSLLTIVMAMALMHSKLDANLLSMVKENASESARKLSLLCHKLLCLLD	RDS1	P25611	273	0.924941	-0.191439	0.995007	-0.0122802
A_tiles_P25611:286	AMALMHSKLDANLLSMVKENASESARKLSLLCHKLLCLLDVFRYPNENTFTCL	RDS1	P25611	286	0.948157	-0.130615	0.968615	-0.0782386
A_tiles_P25611:299	LSMVKENASESARKLSLLCHKLLCLLDVFRYPNENTFTCLLYFYVSEHLDPES	RDS1	P25611	299	0.942265	-0.145911	0.970928	-0.0723886
A_tiles_P25611:312	KLSLLCHKLLCLLDVFRYPNENTFTCLLYFYVSEHLDPESPDCVLSPTNLLTL	RDS1	P25611	312	0.903493	-0.249004	0.975537	-0.0607684
A_tiles_P25611:325	DVFRYPNENTFTCLLYFYVSEHLDPESPDCVLSPTNLLTLHHLLNLSMTLGLQ	RDS1	P25611	325	1.03174	0.0766644	0.989826	-0.0250905
A_tiles_P25611:338	LLYFYVSEHLDPESPDCVLSPTNLLTLHHLLNLSMTLGLQYEPSKYKRFKDPE	RDS1	P25611	338	1.04158	0.0999526	1.02311	0.0560575
A_tiles_P25611:351	SPDCVLSPTNLLTLHHLLNLSMTLGLQYEPSKYKRFKDPEVIRQRRILWLGVQ	RDS1	P25611	351	1.00074	0.00182003	0.9824	-0.0435681
A_tiles_P25611:364	LHHLLNLSMTLGLQYEPSKYKRFKDPEVIRQRRILWLGVQSLLFQISLAEGDA	RDS1	P25611	364	0.949014	-0.1284	0.966109	-0.0845965
A_tiles_P25611:377	QYEPSKYKRFKDPEVIRQRRILWLGVQSLLFQISLAEGDAGKSNSEYMEAYLT	RDS1	P25611	377	0.953667	-0.116398	0.971195	-0.0717116
A_tiles_P25611:39	LQCEYEERTDLSANVAANDSDGFNSSHKLNFEQQPVLERTGLRYSLQVPEGVV	RDS1	P25611	39	1.23788	0.523588	1.18932	0.425396
A_tiles_P25611:390	EVIRQRRILWLGVQSLLFQISLAEGDAGKSNSEYMEAYLTDFEEYIEASSEYE	RDS1	P25611	390	1.07622	0.180233	1.83874	1.49442
A_tiles_P25611:402	VQSLLFQISLAEGDAGKSNSEYMEAYLTDFEEYIEASSEYEKSSASESNVQMN	RDS1	P25611	402	11.7404	6.04321	10.529	5.77602
A_tiles_P25611:415	DAGKSNSEYMEAYLTDFEEYIEASSEYEKSSASESNVQMNDIVWNKYKFHVIL	RDS1	P25611	415	1.59554	1.14633	3.85273	3.30932
A_tiles_P25611:428	LTDFEEYIEASSEYEKSSASESNVQMNDIVWNKYKFHVILSKLMSDCTSVIQH	RDS1	P25611	428	1.46263	0.932926	1.21564	0.479115
A_tiles_P25611:441	YEKSSASESNVQMNDIVWNKYKFHVILSKLMSDCTSVIQHPQLFHILGNIKRS	RDS1	P25611	441	0.882076	-0.307866	0.993916	-0.0149736
A_tiles_P25611:454	NDIVWNKYKFHVILSKLMSDCTSVIQHPQLFHILGNIKRSEDFMAENFPTSSI	RDS1	P25611	454	0.981966	-0.0446526	0.98853	-0.0283059
A_tiles_P25611:467	LSKLMSDCTSVIQHPQLFHILGNIKRSEDFMAENFPTSSIYQPLHEKEPNAIK	RDS1	P25611	467	1.0372	0.0896078	1.21182	0.471387
A_tiles_P25611:480	HPQLFHILGNIKRSEDFMAENFPTSSIYQPLHEKEPNAIKVGKSTVLDVMDIQ	RDS1	P25611	480	1.02705	0.0654888	1.43741	0.890262
A_tiles_P25611:493	SEDFMAENFPTSSIYQPLHEKEPNAIKVGKSTVLDVMDIQKTEIFLTNIVGSM	RDS1	P25611	493	1.93037	1.61374	1.84306	1.50018
A_tiles_P25611:506	IYQPLHEKEPNAIKVGKSTVLDVMDIQKTEIFLTNIVGSMCFLNIFDVLSLHF	RDS1	P25611	506	0.94005	-0.151685	0.982231	-0.0439905
A_tiles_P25611:519	KVGKSTVLDVMDIQKTEIFLTNIVGSMCFLNIFDVLSLHFEKKCVMHWEEYEK	RDS1	P25611	519	0.988936	-0.027297	0.975028	-0.0620474
A_tiles_P25611:52	NVAANDSDGFNSSHKLNFEQQPVLERTGLRYSLQVPEGVVNATLSIWNAEDML	RDS1	P25611	52	3.19487	2.84993	2.03938	1.74852
A_tiles_P25611:532	QKTEIFLTNIVGSMCFLNIFDVLSLHFEKKCVMHWEEYEKNYHFLTLKSFNAY	RDS1	P25611	532	1.03235	0.0781185	0.972277	-0.0689813
A_tiles_P25611:545	MCFLNIFDVLSLHFEKKCVMHWEEYEKNYHFLTLKSFNAYLKLAGLISDYLEN	RDS1	P25611	545	1.01504	0.0366323	0.972252	-0.069043
A_tiles_P25611:558	FEKKCVMHWEEYEKNYHFLTLKSFNAYLKLAGLISDYLENKFQGNILESRGYI	RDS1	P25611	558	0.91441	-0.219537	0.973419	-0.0661019
A_tiles_P25611:571	KNYHFLTLKSFNAYLKLAGLISDYLENKFQGNILESRGYIIDKQICFMLVRIW	RDS1	P25611	571	1.03429	0.0827182	0.986178	-0.0341489
A_tiles_P25611:584	YLKLAGLISDYLENKFQGNILESRGYIIDKQICFMLVRIWMFQCRILLRFSYK	RDS1	P25611	584	1.08515	0.200508	1.01244	0.0303246
A_tiles_P25611:597	NKFQGNILESRGYIIDKQICFMLVRIWMFQCRILLRFSYKQESQKKLASSSIS	RDS1	P25611	597	0.953558	-0.116679	0.99281	-0.0177054
A_tiles_P25611:610	IIDKQICFMLVRIWMFQCRILLRFSYKQESQKKLASSSISTNDNEKEDEMIVI	RDS1	P25611	610	0.931893	-0.173068	0.978483	-0.0533705
A_tiles_P25611:623	WMFQCRILLRFSYKQESQKKLASSSISTNDNEKEDEMIVILERLIKHIRNQMA	RDS1	P25611	623	0.955157	-0.112569	0.971068	-0.0720342
A_tiles_P25611:636	KQESQKKLASSSISTNDNEKEDEMIVILERLIKHIRNQMAHLVDLAKGKLQDS	RDS1	P25611	636	0.875913	-0.32507	0.977865	-0.0549205
A_tiles_P25611:649	STNDNEKEDEMIVILERLIKHIRNQMAHLVDLAKGKLQDSYFGAYQTVPMFRY	RDS1	P25611	649	1.08298	0.19559	0.983295	-0.0413334
A_tiles_P25611:65	HKLNFEQQPVLERTGLRYSLQVPEGVVNATLSIWNAEDMLVIVGLVTFLDYPF	RDS1	P25611	65	0.994418	-0.0137344	1.01267	0.0309024
A_tiles_P25611:662	ILERLIKHIRNQMAHLVDLAKGKLQDSYFGAYQTVPMFRYVVYLIDVGGLVSV	RDS1	P25611	662	0.996326	-0.00903069	0.977619	-0.0555363
A_tiles_P25611:675	AHLVDLAKGKLQDSYFGAYQTVPMFRYVVYLIDVGGLVSVTNGFWDKISSDGE	RDS1	P25611	675	1.03634	0.0875774	1.02982	0.0721055
A_tiles_P25611:688	SYFGAYQTVPMFRYVVYLIDVGGLVSVTNGFWDKISSDGEIPPKVQQAVRLKW	RDS1	P25611	688	0.994347	-0.013909	0.97922	-0.0515211
A_tiles_P25611:701	YVVYLIDVGGLVSVTNGFWDKISSDGEIPPKVQQAVRLKWGLDCNNSRRIKQK	RDS1	P25611	701	0.903682	-0.24849	0.981931	-0.0447402
A_tiles_P25611:714	VTNGFWDKISSDGEIPPKVQQAVRLKWGLDCNNSRRIKQKLISSQSLQSFNQV	RDS1	P25611	714	1.06229	0.148251	1.01618	0.03937
A_tiles_P25611:727	EIPPKVQQAVRLKWGLDCNNSRRIKQKLISSQSLQSFNQVLLCQMEDAVLSSS	RDS1	P25611	727	1.06901	0.163735	1.00059	0.00143898
A_tiles_P25611:740	WGLDCNNSRRIKQKLISSQSLQSFNQVLLCQMEDAVLSSSFAIKANTAMSQNT	RDS1	P25611	740	1.04858	0.116386	1.0272	0.065837
A_tiles_P25611:753	KLISSQSLQSFNQVLLCQMEDAVLSSSFAIKANTAMSQNTAEEFFNISEEEAL	RDS1	P25611	753	5.05663	3.97649	2.10907	1.83096
A_tiles_P25611:766	VLLCQMEDAVLSSSFAIKANTAMSQNTAEEFFNISEEEALNQLLENNNFDAFW	RDS1	P25611	766	41.0602	9.11508	26.6528	8.05479
A_tiles_P25611:779	SFAIKANTAMSQNTAEEFFNISEEEALNQLLENNNFDAFWDLLGENLSDMPSL	RDS1	P25611	779	171.168	12.6178	81.0726	10.7843
A_tiles_P25611:78	TGLRYSLQVPEGVVNATLSIWNAEDMLVIVGLVTFLDYPFAAHSLAQHDQYIR	RDS1	P25611	78	0.948678	-0.129268	0.973972	-0.0647068
A_tiles_P25611:91	VNATLSIWNAEDMLVIVGLVTFLDYPFAAHSLAQHDQYIRALCASLYGMALVD	RDS1	P25611	91	0.978443	-0.0534694	0.976907	-0.0573238
A_tiles_P36023:0	MGYDSQVRTKKRHRITVVCTNCKKRKSKCDRTKPCGTCVRLGDVDSCVYLTDS	OAF3	P36023	0	1.04953	0.118619	1.05467	0.130595
A_tiles_P36023:103	ELENQSSLYYLPIHEETPFFIDLIPNGFYLETKRSADNLFGLFTDRAIENRDP	OAF3	P36023	103	4.06809	3.44278	2.37357	2.12084
A_tiles_P36023:116	HEETPFFIDLIPNGFYLETKRSADNLFGLFTDRAIENRDPYLQAMVTFRSIAI	OAF3	P36023	116	1.01119	0.0273036	1.18614	0.418826
A_tiles_P36023:129	GFYLETKRSADNLFGLFTDRAIENRDPYLQAMVTFRSIAIKKMMDKLGSNGNN	OAF3	P36023	129	0.989685	-0.0254389	1.00684	0.0167222
A_tiles_P36023:13	RITVVCTNCKKRKSKCDRTKPCGTCVRLGDVDSCVYLTDSSGQPESSPSLNDA	OAF3	P36023	13	1.05414	0.129354	1.06791	0.161214
A_tiles_P36023:141	LFGLFTDRAIENRDPYLQAMVTFRSIAIKKMMDKLGSNGNNVKNGSLPKSFEA	OAF3	P36023	141	0.913793	-0.221192	0.993299	-0.0164979
A_tiles_P36023:154	DPYLQAMVTFRSIAIKKMMDKLGSNGNNVKNGSLPKSFEALSTFDADDERHIS	OAF3	P36023	154	0.995253	-0.0116737	0.977359	-0.0561902
A_tiles_P36023:167	AIKKMMDKLGSNGNNVKNGSLPKSFEALSTFDADDERHISDDVVGKGNNFRMH	OAF3	P36023	167	0.944432	-0.140274	1.0018	0.00440614
A_tiles_P36023:180	NNVKNGSLPKSFEALSTFDADDERHISDDVVGKGNNFRMHQTIHKSLFNKFAQ	OAF3	P36023	180	1.10488	0.244717	1.09417	0.220817
A_tiles_P36023:193	ALSTFDADDERHISDDVVGKGNNFRMHQTIHKSLFNKFAQYRENNAKKFSSET	OAF3	P36023	193	1.01196	0.0291623	1.03634	0.087576
A_tiles_P36023:206	SDDVVGKGNNFRMHQTIHKSLFNKFAQYRENNAKKFSSETILAKDYLPPLKIL	OAF3	P36023	206	0.954225	-0.114962	0.998108	-0.00464661
A_tiles_P36023:219	HQTIHKSLFNKFAQYRENNAKKFSSETILAKDYLPPLKILESEVLALFEEKIY	OAF3	P36023	219	1.24409	0.53587	1.047	0.112695
A_tiles_P36023:231	AQYRENNAKKFSSETILAKDYLPPLKILESEVLALFEEKIYNMIPIFDMKVLR	OAF3	P36023	231	0.997729	-0.0055777	0.988048	-0.0295017
A_tiles_P36023:244	ETILAKDYLPPLKILESEVLALFEEKIYNMIPIFDMKVLRHEITIFYQNIVEK	OAF3	P36023	244	1.21142	0.470579	0.979506	-0.0508068
A_tiles_P36023:257	ILESEVLALFEEKIYNMIPIFDMKVLRHEITIFYQNIVEKGNPISIKHYDHMV	OAF3	P36023	257	1.04591	0.110123	0.967217	-0.0817831
A_tiles_P36023:26	SKCDRTKPCGTCVRLGDVDSCVYLTDSSGQPESSPSLNDADPLRKQSTPAERI	OAF3	P36023	26	1.04236	0.101799	1.13061	0.301201
A_tiles_P36023:270	IYNMIPIFDMKVLRHEITIFYQNIVEKGNPISIKHYDHMVFCIILLIIKICRL	OAF3	P36023	270	1.06179	0.147105	1.00406	0.00993798
A_tiles_P36023:283	RHEITIFYQNIVEKGNPISIKHYDHMVFCIILLIIKICRLSVQFSKLTPYIYP	OAF3	P36023	283	0.819403	-0.488699	0.987246	-0.0314936
A_tiles_P36023:296	KGNPISIKHYDHMVFCIILLIIKICRLSVQFSKLTPYIYPVLQEIDTSKFLAL	OAF3	P36023	296	0.923709	-0.194712	0.99373	-0.0154312
A_tiles_P36023:309	VFCIILLIIKICRLSVQFSKLTPYIYPVLQEIDTSKFLALVKHYLFETKVLRK	OAF3	P36023	309	1.11118	0.258656	1.00075	0.00183115
A_tiles_P36023:321	RLSVQFSKLTPYIYPVLQEIDTSKFLALVKHYLFETKVLRKCNLLQLQCLILL	OAF3	P36023	321	0.946281	-0.135476	1.00657	0.0160745
A_tiles_P36023:334	YPVLQEIDTSKFLALVKHYLFETKVLRKCNLLQLQCLILLRFLHWCAPEDGDG	OAF3	P36023	334	0.85729	-0.377799	0.990717	-0.0228835
A_tiles_P36023:347	ALVKHYLFETKVLRKCNLLQLQCLILLRFLHWCAPEDGDGPETQYCQILMGTI	OAF3	P36023	347	0.916727	-0.213326	0.985056	-0.036943
A_tiles_P36023:360	RKCNLLQLQCLILLRFLHWCAPEDGDGPETQYCQILMGTIISSCKEMGINWYC	OAF3	P36023	360	0.962309	-0.0942654	0.980054	-0.0494337
A_tiles_P36023:373	LRFLHWCAPEDGDGPETQYCQILMGTIISSCKEMGINWYCFSHPEKYSFKINR	OAF3	P36023	373	0.886755	-0.294885	1.01187	0.0289555
A_tiles_P36023:386	GPETQYCQILMGTIISSCKEMGINWYCFSHPEKYSFKINRHTRPSYDIMKPSD	OAF3	P36023	386	0.963857	-0.0903217	0.986487	-0.0333822
A_tiles_P36023:39	RLGDVDSCVYLTDSSGQPESSPSLNDADPLRKQSTPAERISPGFIKKRRSSQT	OAF3	P36023	39	1.07602	0.179771	1.00398	0.00973797
A_tiles_P36023:399	IISSCKEMGINWYCFSHPEKYSFKINRHTRPSYDIMKPSDYISVFRKIWSYVL	OAF3	P36023	399	1.08931	0.209891	0.980457	-0.0484254
A_tiles_P36023:411	YCFSHPEKYSFKINRHTRPSYDIMKPSDYISVFRKIWSYVLFWDRKMCFISGE	OAF3	P36023	411	1.04821	0.115519	0.977852	-0.0549535
A_tiles_P36023:424	NRHTRPSYDIMKPSDYISVFRKIWSYVLFWDRKMCFISGEECQIGKTLQCHFK	OAF3	P36023	424	0.972893	-0.0674268	0.969975	-0.0747967
A_tiles_P36023:437	SDYISVFRKIWSYVLFWDRKMCFISGEECQIGKTLQCHFKEEADTPTWYIRML	OAF3	P36023	437	0.933715	-0.168275	0.970153	-0.0743462
A_tiles_P36023:450	VLFWDRKMCFISGEECQIGKTLQCHFKEEADTPTWYIRMLTLDNLMKKINDTL	OAF3	P36023	450	0.874043	-0.330314	0.996282	-0.00913854
A_tiles_P36023:463	EECQIGKTLQCHFKEEADTPTWYIRMLTLDNLMKKINDTLNDDPGKVDLNLLH	OAF3	P36023	463	1.53389	1.04965	1.1345	0.309628
A_tiles_P36023:476	KEEADTPTWYIRMLTLDNLMKKINDTLNDDPGKVDLNLLHRLINDLKRNFHIL	OAF3	P36023	476	0.912638	-0.224296	1.00077	0.00187829
A_tiles_P36023:489	LTLDNLMKKINDTLNDDPGKVDLNLLHRLINDLKRNFHILKSLSKNEKETMRH	OAF3	P36023	489	1.26238	0.571685	0.951203	-0.122747
A_tiles_P36023:501	TLNDDPGKVDLNLLHRLINDLKRNFHILKSLSKNEKETMRHFDFEMEWIIDLF	OAF3	P36023	501	1.07212	0.170853	1.1149	0.266863
A_tiles_P36023:51	DSSGQPESSPSLNDADPLRKQSTPAERISPGFIKKRRSSQTRQDEDHWQRVRE	OAF3	P36023	51	0.984026	-0.0395093	0.97435	-0.0637548
A_tiles_P36023:514	LHRLINDLKRNFHILKSLSKNEKETMRHFDFEMEWIIDLFSLSLLHGEMIFYE	OAF3	P36023	514	1.03962	0.0953448	0.981382	-0.0461113
A_tiles_P36023:527	ILKSLSKNEKETMRHFDFEMEWIIDLFSLSLLHGEMIFYEYDCNITKFYKSFQ	OAF3	P36023	527	0.965269	-0.0867303	0.986275	-0.0339093
A_tiles_P36023:540	RHFDFEMEWIIDLFSLSLLHGEMIFYEYDCNITKFYKSFQDLWDMVIHISEKC	OAF3	P36023	540	1.13144	0.303001	0.98248	-0.0433672
A_tiles_P36023:553	FSLSLLHGEMIFYEYDCNITKFYKSFQDLWDMVIHISEKCYNYFFNSDALEVD	OAF3	P36023	553	1.00623	0.01523	1.08634	0.203186
A_tiles_P36023:566	EYDCNITKFYKSFQDLWDMVIHISEKCYNYFFNSDALEVDSLTKFYTNRIVEI	OAF3	P36023	566	0.909821	-0.231881	1.02189	0.0531368
A_tiles_P36023:579	QDLWDMVIHISEKCYNYFFNSDALEVDSLTKFYTNRIVEIVANKVLVIVPAFI	OAF3	P36023	579	0.941041	-0.149101	0.98322	-0.0415214
A_tiles_P36023:591	KCYNYFFNSDALEVDSLTKFYTNRIVEIVANKVLVIVPAFILRGDRFKTIQYA	OAF3	P36023	591	0.96965	-0.0756187	0.984403	-0.0385692
A_tiles_P36023:604	VDSLTKFYTNRIVEIVANKVLVIVPAFILRGDRFKTIQYADKKKMIEFLYGVS	OAF3	P36023	604	1.0281	0.0679837	0.976656	-0.0579561
A_tiles_P36023:617	EIVANKVLVIVPAFILRGDRFKTIQYADKKKMIEFLYGVSSVYFNEFGFEYYR	OAF3	P36023	617	1.01838	0.0446767	0.969629	-0.0756725
A_tiles_P36023:630	FILRGDRFKTIQYADKKKMIEFLYGVSSVYFNEFGFEYYRCFRKMFTAKIAYK	OAF3	P36023	630	1.05857	0.139664	0.983809	-0.040051
A_tiles_P36023:64	DADPLRKQSTPAERISPGFIKKRRSSQTRQDEDHWQRVRELENQSSLYYLPIH	OAF3	P36023	64	1.1667	0.378294	1.11133	0.258998
A_tiles_P36023:643	ADKKKMIEFLYGVSSVYFNEFGFEYYRCFRKMFTAKIAYKILNRSCEKDAWRI	OAF3	P36023	643	0.925543	-0.189844	0.969826	-0.0751732
A_tiles_P36023:656	SSVYFNEFGFEYYRCFRKMFTAKIAYKILNRSCEKDAWRIILKFLLNELKLED	OAF3	P36023	656	0.943739	-0.142075	0.987771	-0.0301903
A_tiles_P36023:669	RCFRKMFTAKIAYKILNRSCEKDAWRIILKFLLNELKLEDNGDSYIDYNDMRL	OAF3	P36023	669	1.04162	0.100058	0.965478	-0.0861975
A_tiles_P36023:681	YKILNRSCEKDAWRIILKFLLNELKLEDNGDSYIDYNDMRLNDICPIILEFQE	OAF3	P36023	681	1.01894	0.0460253	1.01534	0.0373463
A_tiles_P36023:694	RIILKFLLNELKLEDNGDSYIDYNDMRLNDICPIILEFQETVQKYDGYRPDIL	OAF3	P36023	694	1.37295	0.777694	1.21555	0.478919
A_tiles_P36023:707	EDNGDSYIDYNDMRLNDICPIILEFQETVQKYDGYRPDILSIWNNEFYPIGKY	OAF3	P36023	707	1.92316	1.60456	2.37243	2.11967
A_tiles_P36023:720	RLNDICPIILEFQETVQKYDGYRPDILSIWNNEFYPIGKYNDDMTGFKFQMRI	OAF3	P36023	720	1.04874	0.116756	1.09666	0.22639
A_tiles_P36023:733	ETVQKYDGYRPDILSIWNNEFYPIGKYNDDMTGFKFQMRIKEMQEFLDMEKYS	OAF3	P36023	733	6.11451	4.44258	1.98885	1.68697
A_tiles_P36023:746	LSIWNNEFYPIGKYNDDMTGFKFQMRIKEMQEFLDMEKYSDRFNIFSSFYDHA	OAF3	P36023	746	0.97957	-0.0506465	1.36367	0.761047
A_tiles_P36023:759	YNDDMTGFKFQMRIKEMQEFLDMEKYSDRFNIFSSFYDHASSQLAKHTEVDTN	OAF3	P36023	759	2.58449	2.32973	2.09436	1.81379
A_tiles_P36023:77	RISPGFIKKRRSSQTRQDEDHWQRVRELENQSSLYYLPIHEETPFFIDLIPNG	OAF3	P36023	77	3.79201	3.27035	2.46519	2.21378
A_tiles_P36023:771	RIKEMQEFLDMEKYSDRFNIFSSFYDHASSQLAKHTEVDTNISITNEQVAEIP	OAF3	P36023	771	2.38712	2.13482	4.0532	3.43378
A_tiles_P36023:784	YSDRFNIFSSFYDHASSQLAKHTEVDTNISITNEQVAEIPQKELLQQPLAPAL	OAF3	P36023	784	1.14481	0.331808	1.75756	1.38363
A_tiles_P36023:797	HASSQLAKHTEVDTNISITNEQVAEIPQKELLQQPLAPALPVNDLIVSEFDVI	OAF3	P36023	797	1.82616	1.47757	2.23093	1.96879
A_tiles_P36023:810	TNISITNEQVAEIPQKELLQQPLAPALPVNDLIVSEFDVIEDIFDPVDFVSFF	OAF3	P36023	810	148.068	12.2621	18.585	7.17018
A_tiles_P36023:90	QTRQDEDHWQRVRELENQSSLYYLPIHEETPFFIDLIPNGFYLETKRSADNLF	OAF3	P36023	90	4.75836	3.82732	2.08095	1.79803
A_tiles_P38165:0	MMNNNESEAENQRLLDELMNQTKVLQETLDFSLVTPTPHHNDDYKIHGSAYPG	RTG3	P38165	0	8.58785	5.27602	2.81901	2.54284
A_tiles_P38165:102	SSYLDDMFRTSQGGRPVTQNSISSIGQGPLRSSYSMAYDSPVDRAMNTPLQQQ	RTG3	P38165	102	2.59301	2.3378	1.29749	0.638978
A_tiles_P38165:115	GRPVTQNSISSIGQGPLRSSYSMAYDSPVDRAMNTPLQQQEGLKAELPHDFLF	RTG3	P38165	115	2.00615	1.70821	2.17104	1.90202
A_tiles_P38165:127	GQGPLRSSYSMAYDSPVDRAMNTPLQQQEGLKAELPHDFLFQHGTDDTMYNLT	RTG3	P38165	127	3.62624	3.16068	4.97326	3.9357
A_tiles_P38165:13	LLDELMNQTKVLQETLDFSLVTPTPHHNDDYKIHGSAYPGGETPAQQHEKLSY	RTG3	P38165	13	3.33012	2.95166	2.36319	2.11009
A_tiles_P38165:140	DSPVDRAMNTPLQQQEGLKAELPHDFLFQHGTDDTMYNLTDDLSSSLSSSINS	RTG3	P38165	140	15.6567	6.7495	13.1555	6.32244
A_tiles_P38165:153	QQEGLKAELPHDFLFQHGTDDTMYNLTDDLSSSLSSSINSDMMTPNTYSSSFS	RTG3	P38165	153	23.4199	7.73753	29.0164	8.26327
A_tiles_P38165:166	LFQHGTDDTMYNLTDDLSSSLSSSINSDMMTPNTYSSSFSYNPQSLGPASVSS	RTG3	P38165	166	10.4467	5.75676	11.1352	5.91336
A_tiles_P38165:178	LTDDLSSSLSSSINSDMMTPNTYSSSFSYNPQSLGPASVSSTYSPKVRSPSSS	RTG3	P38165	178	1.79206	1.43132	2.88843	2.60253
A_tiles_P38165:191	NSDMMTPNTYSSSFSYNPQSLGPASVSSTYSPKVRSPSSSFRAGSFLSSSFRH	RTG3	P38165	191	1.18247	0.411233	1.15335	0.350061
A_tiles_P38165:204	FSYNPQSLGPASVSSTYSPKVRSPSSSFRAGSFLSSSFRHGSINTPRTRHTSI	RTG3	P38165	204	1.03629	0.0874679	1.00029	0.000701117
A_tiles_P38165:216	VSSTYSPKVRSPSSSFRAGSFLSSSFRHGSINTPRTRHTSISSNMTENIGPGS	RTG3	P38165	216	0.9368	-0.160181	1.01733	0.0421535
A_tiles_P38165:229	SSFRAGSFLSSSFRHGSINTPRTRHTSISSNMTENIGPGSVPKILGGLTSDEK	RTG3	P38165	229	0.827963	-0.463201	0.989285	-0.0264307
A_tiles_P38165:242	RHGSINTPRTRHTSISSNMTENIGPGSVPKILGGLTSDEKLRRKREFHNAVER	RTG3	P38165	242	0.890773	-0.283792	0.9415	-0.147904
A_tiles_P38165:25	QETLDFSLVTPTPHHNDDYKIHGSAYPGGETPAQQHEKLSYINTHNSNDNNNL	RTG3	P38165	25	1.87529	1.54271	1.41755	0.856122
A_tiles_P38165:255	SISSNMTENIGPGSVPKILGGLTSDEKLRRKREFHNAVERRRRELIKQKIKEL	RTG3	P38165	255	1.00928	0.0226536	0.971049	-0.0720805
A_tiles_P38165:267	GSVPKILGGLTSDEKLRRKREFHNAVERRRRELIKQKIKELGQLVPPSLLNYD	RTG3	P38165	267	1.03408	0.0822272	0.966624	-0.083287
A_tiles_P38165:280	EKLRRKREFHNAVERRRRELIKQKIKELGQLVPPSLLNYDDLGKQIKPNKGII	RTG3	P38165	280	0.987462	-0.0309564	0.957118	-0.107536
A_tiles_P38165:293	ERRRRELIKQKIKELGQLVPPSLLNYDDLGKQIKPNKGIILDRTVEYLQYLAE	RTG3	P38165	293	0.937444	-0.158496	1.05275	0.12612
A_tiles_P38165:306	ELGQLVPPSLLNYDDLGKQIKPNKGIILDRTVEYLQYLAEILEIQARKKKALL	RTG3	P38165	306	0.964874	-0.0877346	1.01254	0.0305826
A_tiles_P38165:318	YDDLGKQIKPNKGIILDRTVEYLQYLAEILEIQARKKKALLAKIKELEEKKSS	RTG3	P38165	318	0.887659	-0.292385	0.965459	-0.0862466
A_tiles_P38165:331	IILDRTVEYLQYLAEILEIQARKKKALLAKIKELEEKKSSVAALSPFTNNHHA	RTG3	P38165	331	0.962202	-0.0945375	0.961226	-0.097029
A_tiles_P38165:344	AEILEIQARKKKALLAKIKELEEKKSSVAALSPFTNNHHASSGQNNSENSEER	RTG3	P38165	344	0.845932	-0.410521	0.935176	-0.164438
A_tiles_P38165:357	LLAKIKELEEKKSSVAALSPFTNNHHASSGQNNSENSEERIIDIRSVPNALMN	RTG3	P38165	357	0.883475	-0.303978	0.996126	-0.0095237
A_tiles_P38165:369	SSVAALSPFTNNHHASSGQNNSENSEERIIDIRSVPNALMNEQNSKAELHNWE	RTG3	P38165	369	1.16423	0.373079	1.06735	0.159929
A_tiles_P38165:38	HHNDDYKIHGSAYPGGETPAQQHEKLSYINTHNSNDNNNLMGSQARSNSQTPT	RTG3	P38165	38	1.04655	0.111627	1.03208	0.0774631
A_tiles_P38165:382	HASSGQNNSENSEERIIDIRSVPNALMNEQNSKAELHNWEPPLYDSVGNHNHA	RTG3	P38165	382	1.35886	0.752373	1.28786	0.620709
A_tiles_P38165:395	ERIIDIRSVPNALMNEQNSKAELHNWEPPLYDSVGNHNHAGTMESHPHTNIHE	RTG3	P38165	395	1.49374	0.98457	1.6081	1.16557
A_tiles_P38165:408	MNEQNSKAELHNWEPPLYDSVGNHNHAGTMESHPHTNIHEELKEFLSGDLIEA	RTG3	P38165	408	16.3366	6.85381	7.82135	5.04663
A_tiles_P38165:420	WEPPLYDSVGNHNHAGTMESHPHTNIHEELKEFLSGDLIEAEDNAKLMFGDDN	RTG3	P38165	420	27.7847	8.15684	20.1646	7.37033
A_tiles_P38165:433	HAGTMESHPHTNIHEELKEFLSGDLIEAEDNAKLMFGDDNSNPADYLLEFGSG	RTG3	P38165	433	48.2509	9.51103	33.9148	8.646
A_tiles_P38165:51	PGGETPAQQHEKLSYINTHNSNDNNNLMGSQARSNSQTPTASTIYEEAESQSS	RTG3	P38165	51	1.09911	0.231863	0.98378	-0.0401219
A_tiles_P38165:64	SYINTHNSNDNNNLMGSQARSNSQTPTASTIYEEAESQSSYLDDMFRTSQGGR	RTG3	P38165	64	12.5423	6.20533	1.3155	0.672806
A_tiles_P38165:76	NLMGSQARSNSQTPTASTIYEEAESQSSYLDDMFRTSQGGRPVTQNSISSIGQ	RTG3	P38165	76	11.3105	5.95169	1.37215	0.776257
A_tiles_P38165:89	PTASTIYEEAESQSSYLDDMFRTSQGGRPVTQNSISSIGQGPLRSSYSMAYDS	RTG3	P38165	89	19.2052	7.25073	1.82007	1.46938
A_tiles_P38781:0	MMDMQVRKVRKPPACTQCRKRKIGCDRAKPICGNCVKYNKPDCFYPDGPGKMV	RSC30	P38781	0	1.01775	0.0431788	1.0126	0.0307291
A_tiles_P38781:104	NPSVDTAMQWTKAASYQNNNTNNNTAPRQNSSTVSSNVHGNTIVRSDSPDVPS	RSC30	P38781	104	1.0399	0.0959857	1.00153	0.00374084
A_tiles_P38781:117	ASYQNNNTNNNTAPRQNSSTVSSNVHGNTIVRSDSPDVPSMDQIREYNTRLQL	RSC30	P38781	117	1.22711	0.502158	1.01229	0.0299771
A_tiles_P38781:13	ACTQCRKRKIGCDRAKPICGNCVKYNKPDCFYPDGPGKMVAVPSASGMSTHGN	RSC30	P38781	13	1.08148	0.192195	1.00426	0.0104267
A_tiles_P38781:130	PRQNSSTVSSNVHGNTIVRSDSPDVPSMDQIREYNTRLQLVNAQSFDYTDNPY	RSC30	P38781	130	1.85848	1.52061	1.3084	0.659535
A_tiles_P38781:143	GNTIVRSDSPDVPSMDQIREYNTRLQLVNAQSFDYTDNPYSFNVGINQDSAVF	RSC30	P38781	143	3.73123	3.2307	2.18199	1.91436
A_tiles_P38781:156	SMDQIREYNTRLQLVNAQSFDYTDNPYSFNVGINQDSAVFDLMTSPFTQEEVL	RSC30	P38781	156	9.86917	5.61723	10.0949	5.67271
A_tiles_P38781:169	LVNAQSFDYTDNPYSFNVGINQDSAVFDLMTSPFTQEEVLIKEIDFLKNKLLD	RSC30	P38781	169	1.5945	1.14473	5.88382	4.34822
A_tiles_P38781:182	YSFNVGINQDSAVFDLMTSPFTQEEVLIKEIDFLKNKLLDLQSLQLKSLKEKS	RSC30	P38781	182	1.29028	0.625309	1.14624	0.334887
A_tiles_P38781:195	FDLMTSPFTQEEVLIKEIDFLKNKLLDLQSLQLKSLKEKSNLNADNTTANKIN	RSC30	P38781	195	1.2224	0.492711	1.14196	0.325698
A_tiles_P38781:208	LIKEIDFLKNKLLDLQSLQLKSLKEKSNLNADNTTANKINKTGENSKKGKVDG	RSC30	P38781	208	0.936118	-0.161968	0.929656	-0.178966
A_tiles_P38781:220	LDLQSLQLKSLKEKSNLNADNTTANKINKTGENSKKGKVDGKRAGFDHQTSRT	RSC30	P38781	220	1.0143	0.0348272	0.911508	-0.227334
A_tiles_P38781:233	KSNLNADNTTANKINKTGENSKKGKVDGKRAGFDHQTSRTSQSSQKYFTALTI	RSC30	P38781	233	1.01259	0.0306953	0.955864	-0.110754
A_tiles_P38781:246	INKTGENSKKGKVDGKRAGFDHQTSRTSQSSQKYFTALTITDVQSLVQVKPLK	RSC30	P38781	246	0.973044	-0.0670454	0.993745	-0.015394
A_tiles_P38781:259	DGKRAGFDHQTSRTSQSSQKYFTALTITDVQSLVQVKPLKDTPNYLFTKNFII	RSC30	P38781	259	0.95974	-0.100825	1.06042	0.14394
A_tiles_P38781:26	RAKPICGNCVKYNKPDCFYPDGPGKMVAVPSASGMSTHGNGQGSNHFSQGNGV	RSC30	P38781	26	1.18317	0.412675	1.08312	0.195912
A_tiles_P38781:272	TSQSSQKYFTALTITDVQSLVQVKPLKDTPNYLFTKNFIIFRDHYLFKFYNIL	RSC30	P38781	272	1.04059	0.0976276	0.976687	-0.0578779
A_tiles_P38781:285	ITDVQSLVQVKPLKDTPNYLFTKNFIIFRDHYLFKFYNILHDICHINQFKVSP	RSC30	P38781	285	0.954622	-0.113942	0.974191	-0.0641557
A_tiles_P38781:298	KDTPNYLFTKNFIIFRDHYLFKFYNILHDICHINQFKVSPPNNKNHQQYMEVC	RSC30	P38781	298	0.93686	-0.160025	0.965195	-0.0869168
A_tiles_P38781:311	IFRDHYLFKFYNILHDICHINQFKVSPPNNKNHQQYMEVCKVNFPPKAIIIET	RSC30	P38781	311	1.0253	0.0612928	0.975739	-0.0602608
A_tiles_P38781:324	LHDICHINQFKVSPPNNKNHQQYMEVCKVNFPPKAIIIETLNSESLNNLNIEE	RSC30	P38781	324	1.34098	0.719886	1.34205	0.72183
A_tiles_P38781:337	PPNNKNHQQYMEVCKVNFPPKAIIIETLNSESLNNLNIEEFLPIFDKTLLLEF	RSC30	P38781	337	1.05884	0.140288	1.67623	1.26739
A_tiles_P38781:350	CKVNFPPKAIIIETLNSESLNNLNIEEFLPIFDKTLLLEFVHNSFPNGDTCPS	RSC30	P38781	350	1.6389	1.21213	1.43309	0.88288
A_tiles_P38781:363	TLNSESLNNLNIEEFLPIFDKTLLLEFVHNSFPNGDTCPSFSTVDLPLSQLTK	RSC30	P38781	363	3.42008	3.01706	1.35741	0.749764
A_tiles_P38781:376	EFLPIFDKTLLLEFVHNSFPNGDTCPSFSTVDLPLSQLTKLGELTVLLLLLND	RSC30	P38781	376	1.14156	0.324846	0.986545	-0.0332364
A_tiles_P38781:389	FVHNSFPNGDTCPSFSTVDLPLSQLTKLGELTVLLLLLNDSMTLFNKQAINNH	RSC30	P38781	389	1.08197	0.19331	0.985716	-0.0352994
A_tiles_P38781:39	KPDCFYPDGPGKMVAVPSASGMSTHGNGQGSNHFSQGNGVNQKNVMIQTQYPI	RSC30	P38781	39	1.15253	0.348297	1.12456	0.288036
A_tiles_P38781:402	SFSTVDLPLSQLTKLGELTVLLLLLNDSMTLFNKQAINNHVSALMNNLRLIRS	RSC30	P38781	402	1.00519	0.0126906	0.986274	-0.0339102
A_tiles_P38781:415	KLGELTVLLLLLNDSMTLFNKQAINNHVSALMNNLRLIRSQITLINLEYYDQE	RSC30	P38781	415	0.93823	-0.156439	0.972243	-0.0690655
A_tiles_P38781:428	DSMTLFNKQAINNHVSALMNNLRLIRSQITLINLEYYDQETIKFIAITKFYES	RSC30	P38781	428	0.908384	-0.235759	0.981465	-0.0459027
A_tiles_P38781:441	HVSALMNNLRLIRSQITLINLEYYDQETIKFIAITKFYESLYMHDDHKSSLDE	RSC30	P38781	441	0.896817	-0.267201	0.97408	-0.0644349
A_tiles_P38781:454	SQITLINLEYYDQETIKFIAITKFYESLYMHDDHKSSLDEDLSCLLSFQIKDF	RSC30	P38781	454	1.04228	0.101606	1.14293	0.327779
A_tiles_P38781:467	ETIKFIAITKFYESLYMHDDHKSSLDEDLSCLLSFQIKDFKLFHFLKKMYYSR	RSC30	P38781	467	0.925574	-0.189762	0.982763	-0.0426598
A_tiles_P38781:480	SLYMHDDHKSSLDEDLSCLLSFQIKDFKLFHFLKKMYYSRHSLLGQSSFMVPA	RSC30	P38781	480	1.01114	0.0271813	0.994602	-0.0132813
A_tiles_P38781:493	EDLSCLLSFQIKDFKLFHFLKKMYYSRHSLLGQSSFMVPAAENLSPIPASIDT	RSC30	P38781	493	0.947067	-0.133438	0.970649	-0.0730938
A_tiles_P38781:506	FKLFHFLKKMYYSRHSLLGQSSFMVPAAENLSPIPASIDTNDIPLIANDLKLL	RSC30	P38781	506	0.924498	-0.192617	0.999279	-0.00176868
A_tiles_P38781:519	RHSLLGQSSFMVPAAENLSPIPASIDTNDIPLIANDLKLLETQAKLINILQGV	RSC30	P38781	519	1.19821	0.443676	1.11392	0.264711
A_tiles_P38781:52	VAVPSASGMSTHGNGQGSNHFSQGNGVNQKNVMIQTQYPIMQTSIEAFNFSFN	RSC30	P38781	52	2.40647	2.15462	1.3416	0.721021
A_tiles_P38781:532	AAENLSPIPASIDTNDIPLIANDLKLLETQAKLINILQGVPFYLPVNLTKIES	RSC30	P38781	532	1.44855	0.909207	1.02027	0.04924
A_tiles_P38781:545	TNDIPLIANDLKLLETQAKLINILQGVPFYLPVNLTKIESLLETLTMGVSNTV	RSC30	P38781	545	0.941699	-0.147384	0.967174	-0.0818924
A_tiles_P38781:558	LETQAKLINILQGVPFYLPVNLTKIESLLETLTMGVSNTVDLYFHDNEVRKEW	RSC30	P38781	558	1.00097	0.00237512	0.978496	-0.0533357
A_tiles_P38781:571	VPFYLPVNLTKIESLLETLTMGVSNTVDLYFHDNEVRKEWKDTLNFINTIVYT	RSC30	P38781	571	1.07382	0.174745	0.990558	-0.0232763
A_tiles_P38781:584	SLLETLTMGVSNTVDLYFHDNEVRKEWKDTLNFINTIVYTNFFLFVQNESSLS	RSC30	P38781	584	1.03802	0.0915658	1.0277	0.0670293
A_tiles_P38781:597	VDLYFHDNEVRKEWKDTLNFINTIVYTNFFLFVQNESSLSMAVQHSSNNNKTS	RSC30	P38781	597	0.957667	-0.10613	1.02043	0.0496143
A_tiles_P38781:610	WKDTLNFINTIVYTNFFLFVQNESSLSMAVQHSSNNNKTSNSERCAKDLMKII	RSC30	P38781	610	0.940272	-0.151107	0.957081	-0.10763
A_tiles_P38781:622	YTNFFLFVQNESSLSMAVQHSSNNNKTSNSERCAKDLMKIISNMHIFYSITFN	RSC30	P38781	622	0.977463	-0.0559288	0.992645	-0.0181121
A_tiles_P38781:635	LSMAVQHSSNNNKTSNSERCAKDLMKIISNMHIFYSITFNFIFPIKSIKSFSS	RSC30	P38781	635	0.983029	-0.041996	0.980028	-0.0494979
A_tiles_P38781:648	TSNSERCAKDLMKIISNMHIFYSITFNFIFPIKSIKSFSSGNNRFHSNGKEFL	RSC30	P38781	648	0.918059	-0.209765	0.966608	-0.0833272
A_tiles_P38781:65	NGQGSNHFSQGNGVNQKNVMIQTQYPIMQTSIEAFNFSFNPSVDTAMQWTKAA	RSC30	P38781	65	1.66463	1.25035	1.56661	1.10144
A_tiles_P38781:661	IISNMHIFYSITFNFIFPIKSIKSFSSGNNRFHSNGKEFLFANHFIEILQNFI	RSC30	P38781	661	0.985018	-0.0370365	0.972705	-0.0679011
A_tiles_P38781:674	NFIFPIKSIKSFSSGNNRFHSNGKEFLFANHFIEILQNFIAITFAIFQRCEVI	RSC30	P38781	674	0.954262	-0.11487	0.984125	-0.039263
A_tiles_P38781:687	SGNNRFHSNGKEFLFANHFIEILQNFIAITFAIFQRCEVILYDEFYKNLSNEE	RSC30	P38781	687	0.944603	-0.139829	0.973543	-0.0657881
A_tiles_P38781:700	LFANHFIEILQNFIAITFAIFQRCEVILYDEFYKNLSNEEINVQLLLIHDKIL	RSC30	P38781	700	0.946654	-0.134509	0.981321	-0.0462624
A_tiles_P38781:713	IAITFAIFQRCEVILYDEFYKNLSNEEINVQLLLIHDKILEILKKIEIIVSFL	RSC30	P38781	713	0.982927	-0.0422507	0.978679	-0.0528789
A_tiles_P38781:726	ILYDEFYKNLSNEEINVQLLLIHDKILEILKKIEIIVSFLRDEMNSNGSFKSI	RSC30	P38781	726	0.947741	-0.131692	0.978562	-0.0531706
A_tiles_P38781:739	EINVQLLLIHDKILEILKKIEIIVSFLRDEMNSNGSFKSIKGFNKVLNLIKYM	RSC30	P38781	739	0.942043	-0.146487	0.990397	-0.0236759
A_tiles_P38781:752	LEILKKIEIIVSFLRDEMNSNGSFKSIKGFNKVLNLIKYMLRFSKKKQNFARN	RSC30	P38781	752	0.879798	-0.314211	0.980487	-0.0483495
A_tiles_P38781:765	LRDEMNSNGSFKSIKGFNKVLNLIKYMLRFSKKKQNFARNSDNNNVTDYSQSA	RSC30	P38781	765	0.952818	-0.118583	0.961035	-0.0975155
A_tiles_P38781:778	IKGFNKVLNLIKYMLRFSKKKQNFARNSDNNNVTDYSQSAKNKNVLLKFPVSE	RSC30	P38781	778	0.914847	-0.218363	0.955073	-0.112784
A_tiles_P38781:78	VNQKNVMIQTQYPIMQTSIEAFNFSFNPSVDTAMQWTKAASYQNNNTNNNTAP	RSC30	P38781	78	2.14991	1.87802	1.50186	0.997873
A_tiles_P38781:791	MLRFSKKKQNFARNSDNNNVTDYSQSAKNKNVLLKFPVSELNRIYLKFKEISD	RSC30	P38781	791	1.11614	0.269589	0.999197	-0.00197084
A_tiles_P38781:804	NSDNNNVTDYSQSAKNKNVLLKFPVSELNRIYLKFKEISDFLMEREVVQRSII	RSC30	P38781	804	0.934285	-0.166779	0.98267	-0.0428921
A_tiles_P38781:817	AKNKNVLLKFPVSELNRIYLKFKEISDFLMEREVVQRSIIIDKDLESDNLGIT	RSC30	P38781	817	0.963274	-0.0918059	0.958493	-0.104014
A_tiles_P38781:830	ELNRIYLKFKEISDFLMEREVVQRSIIIDKDLESDNLGITTANFNDFYDAFYN	RSC30	P38781	830	2.40819	2.15638	2.42431	2.17275
A_tiles_P38781:91	IMQTSIEAFNFSFNPSVDTAMQWTKAASYQNNNTNNNTAPRQNSSTVSSNVHG	RSC30	P38781	91	1.53892	1.05768	2.01222	1.71562
A_tiles_P39720:0	MVENSTQKAPHAGNDDNSSTKPYSEAFFLGFNNPTPGLEAEHSSTSPAPENSE	OAF1	P39720	0	1.60601	1.16239	1.92514	1.60709
A_tiles_P39720:103	RIPSKDAIISRLEKDMFYWKDKAMKLLTEREVNESGKRSASPINTNNASGDSP	OAF1	P39720	103	0.875972	-0.324903	1.01823	0.0443243
A_tiles_P39720:116	KDMFYWKDKAMKLLTEREVNESGKRSASPINTNNASGDSPDTKKQHKMEPIYE	OAF1	P39720	116	0.874839	-0.32808	0.974777	-0.0626788
A_tiles_P39720:129	LTEREVNESGKRSASPINTNNASGDSPDTKKQHKMEPIYEQSGNGDINNGTRN	OAF1	P39720	129	1.05125	0.122638	0.957006	-0.107823
A_tiles_P39720:13	NDDNSSTKPYSEAFFLGFNNPTPGLEAEHSSTSPAPENSETHNRKRNRILFVC	OAF1	P39720	13	1.42331	0.866065	1.30256	0.648547
A_tiles_P39720:142	ASPINTNNASGDSPDTKKQHKMEPIYEQSGNGDINNGTRNDIEINLYRSHPTM	OAF1	P39720	142	1.11761	0.27282	1.00543	0.0132929
A_tiles_P39720:155	PDTKKQHKMEPIYEQSGNGDINNGTRNDIEINLYRSHPTMIMSKVMKREVKPL	OAF1	P39720	155	0.94085	-0.149598	0.9912	-0.0216881
A_tiles_P39720:168	EQSGNGDINNGTRNDIEINLYRSHPTMIMSKVMKREVKPLSENYIIIQDCFLK	OAF1	P39720	168	3.21939	2.86869	1.08911	0.209434
A_tiles_P39720:181	NDIEINLYRSHPTMIMSKVMKREVKPLSENYIIIQDCFLKILVTSVFLDTSKN	OAF1	P39720	181	0.963449	-0.0913609	0.986582	-0.0331455
A_tiles_P39720:194	MIMSKVMKREVKPLSENYIIIQDCFLKILVTSVFLDTSKNTMIPALTANANIT	OAF1	P39720	194	0.989295	-0.0264079	0.969613	-0.0757138
A_tiles_P39720:207	LSENYIIIQDCFLKILVTSVFLDTSKNTMIPALTANANITRAQPSVANNLLKL	OAF1	P39720	207	1.00231	0.00566422	0.971809	-0.0701625
A_tiles_P39720:219	LKILVTSVFLDTSKNTMIPALTANANITRAQPSVANNLLKLKEMLIRQCQTED	OAF1	P39720	219	0.810942	-0.514165	0.960884	-0.0979022
A_tiles_P39720:232	KNTMIPALTANANITRAQPSVANNLLKLKEMLIRQCQTEDEKNRVNEFTDRIL	OAF1	P39720	232	0.940746	-0.149869	0.967521	-0.0810122
A_tiles_P39720:245	ITRAQPSVANNLLKLKEMLIRQCQTEDEKNRVNEFTDRILQNTNSNRNLKIGM	OAF1	P39720	245	0.929953	-0.178181	0.960455	-0.0989966
A_tiles_P39720:258	KLKEMLIRQCQTEDEKNRVNEFTDRILQNTNSNRNLKIGMLLSMLYNSVGYQY	OAF1	P39720	258	0.949891	-0.126133	0.996912	-0.00758784
A_tiles_P39720:26	FFLGFNNPTPGLEAEHSSTSPAPENSETHNRKRNRILFVCQACRKSKTKCDRE	OAF1	P39720	26	1.08217	0.193747	1.0087	0.0212419
A_tiles_P39720:271	DEKNRVNEFTDRILQNTNSNRNLKIGMLLSMLYNSVGYQYLEDHCPQGGEYSD	OAF1	P39720	271	0.937825	-0.157499	1.07017	0.166401
A_tiles_P39720:284	LQNTNSNRNLKIGMLLSMLYNSVGYQYLEDHCPQGGEYSDLLRNLINECEAIL	OAF1	P39720	284	1.14884	0.340431	0.995721	-0.0105224
A_tiles_P39720:297	MLLSMLYNSVGYQYLEDHCPQGGEYSDLLRNLINECEAILPSYEIIERYKNHF	OAF1	P39720	297	1.6098	1.16817	1.06769	0.160694
A_tiles_P39720:310	YLEDHCPQGGEYSDLLRNLINECEAILPSYEIIERYKNHFYEYVYPSLPFIEL	OAF1	P39720	310	1.12913	0.297975	1.09945	0.232625
A_tiles_P39720:323	DLLRNLINECEAILPSYEIIERYKNHFYEYVYPSLPFIELEIFEESLSQTIFP	OAF1	P39720	323	1.23872	0.525248	1.04906	0.117522
A_tiles_P39720:336	LPSYEIIERYKNHFYEYVYPSLPFIELEIFEESLSQTIFPDPNNPSKVQIRMG	OAF1	P39720	336	1.12706	0.293487	1.16732	0.379584
A_tiles_P39720:349	FYEYVYPSLPFIELEIFEESLSQTIFPDPNNPSKVQIRMGSTHLRAKVENLSL	OAF1	P39720	349	1.03624	0.0873345	1.17818	0.402311
A_tiles_P39720:361	ELEIFEESLSQTIFPDPNNPSKVQIRMGSTHLRAKVENLSLLLVILKLSYMSI	OAF1	P39720	361	1.04051	0.0974247	1.03445	0.0830927
A_tiles_P39720:374	FPDPNNPSKVQIRMGSTHLRAKVENLSLLLVILKLSYMSIRFLDHSTADSSFY	OAF1	P39720	374	0.875424	-0.326439	0.966314	-0.0840748
A_tiles_P39720:387	MGSTHLRAKVENLSLLLVILKLSYMSIRFLDHSTADSSFYLSKEIIDKYPIPN	OAF1	P39720	387	0.991492	-0.0209639	0.964912	-0.0876372
A_tiles_P39720:39	AEHSSTSPAPENSETHNRKRNRILFVCQACRKSKTKCDREKPECGRCVKHGLK	OAF1	P39720	39	0.936484	-0.16101	0.973267	-0.0664838
A_tiles_P39720:400	SLLLVILKLSYMSIRFLDHSTADSSFYLSKEIIDKYPIPNDFILLSQRCLASE	OAF1	P39720	400	0.97497	-0.0621951	0.97992	-0.0497681
A_tiles_P39720:413	IRFLDHSTADSSFYLSKEIIDKYPIPNDFILLSQRCLASENWCACANENIISC	OAF1	P39720	413	1.19628	0.439718	1.08993	0.211293
A_tiles_P39720:426	YLSKEIIDKYPIPNDFILLSQRCLASENWCACANENIISCLLYIWSFFAFSPE	OAF1	P39720	426	1.00171	0.00418835	0.981004	-0.0470561
A_tiles_P39720:439	NDFILLSQRCLASENWCACANENIISCLLYIWSFFAFSPEEGDFFLEHPTDVI	OAF1	P39720	439	1.03952	0.0951082	0.989445	-0.0260343
A_tiles_P39720:452	ENWCACANENIISCLLYIWSFFAFSPEEGDFFLEHPTDVISSLIMMLSTSIGL	OAF1	P39720	452	0.990945	-0.0223171	0.992531	-0.0183938
A_tiles_P39720:465	CLLYIWSFFAFSPEEGDFFLEHPTDVISSLIMMLSTSIGLHRDPSDFPQLISP	OAF1	P39720	465	0.949555	-0.127002	1.00474	0.0115927
A_tiles_P39720:478	EEGDFFLEHPTDVISSLIMMLSTSIGLHRDPSDFPQLISPSTSDKRTLNHRRI	OAF1	P39720	478	0.937327	-0.158802	1.86255	1.52599
A_tiles_P39720:491	ISSLIMMLSTSIGLHRDPSDFPQLISPSTSDKRTLNHRRILWLSIVTVCSFEA	OAF1	P39720	491	1.02554	0.0618773	0.984761	-0.0376766
A_tiles_P39720:503	GLHRDPSDFPQLISPSTSDKRTLNHRRILWLSIVTVCSFEASLKGRHSVSPIS	OAF1	P39720	503	0.992426	-0.0186549	0.98219	-0.0440912
A_tiles_P39720:516	SPSTSDKRTLNHRRILWLSIVTVCSFEASLKGRHSVSPISLMALFLNIKDPDS	OAF1	P39720	516	0.924794	-0.191829	0.982844	-0.042459
A_tiles_P39720:52	ETHNRKRNRILFVCQACRKSKTKCDREKPECGRCVKHGLKCVYDVSKQPAPRI	OAF1	P39720	52	0.912707	-0.224109	0.968212	-0.0792596
A_tiles_P39720:529	RILWLSIVTVCSFEASLKGRHSVSPISLMALFLNIKDPDSLTVYMNRVRGDLS	OAF1	P39720	529	0.975212	-0.0615852	0.976835	-0.0575068
A_tiles_P39720:542	EASLKGRHSVSPISLMALFLNIKDPDSLTVYMNRVRGDLSDINNHKLLRIHKF	OAF1	P39720	542	1.04964	0.11888	0.98938	-0.0261967
A_tiles_P39720:555	SLMALFLNIKDPDSLTVYMNRVRGDLSDINNHKLLRIHKFTFKRAQLALLLSD	OAF1	P39720	555	0.964754	-0.0880398	0.983255	-0.0414322
A_tiles_P39720:568	SLTVYMNRVRGDLSDINNHKLLRIHKFTFKRAQLALLLSDLDNLTMTYYGSFH	OAF1	P39720	568	0.853795	-0.38782	0.963775	-0.0905297
A_tiles_P39720:581	SDINNHKLLRIHKFTFKRAQLALLLSDLDNLTMTYYGSFHLHSIEFIREKIEI	OAF1	P39720	581	1.0322	0.077769	0.976912	-0.0573124
A_tiles_P39720:594	FTFKRAQLALLLSDLDNLTMTYYGSFHLHSIEFIREKIEIFVEENFPIVPLKS	OAF1	P39720	594	1.01505	0.0366489	0.971481	-0.0709898
A_tiles_P39720:607	DLDNLTMTYYGSFHLHSIEFIREKIEIFVEENFPIVPLKSVAQDKSDLDDMNV	OAF1	P39720	607	0.945197	-0.138286	1.06058	0.144319
A_tiles_P39720:620	HLHSIEFIREKIEIFVEENFPIVPLKSVAQDKSDLDDMNVISEMNILSSENSS	OAF1	P39720	620	1.13279	0.305914	1.94214	1.62866
A_tiles_P39720:633	IFVEENFPIVPLKSVAQDKSDLDDMNVISEMNILSSENSSSFHNRIMNKLLML	OAF1	P39720	633	1.16064	0.36552	1.43097	0.87924
A_tiles_P39720:645	KSVAQDKSDLDDMNVISEMNILSSENSSSFHNRIMNKLLMLRTSMAVFLHFET	OAF1	P39720	645	0.975883	-0.0598986	1.01382	0.0336652
A_tiles_P39720:65	CQACRKSKTKCDREKPECGRCVKHGLKCVYDVSKQPAPRIPSKDAIISRLEKD	OAF1	P39720	65	0.906286	-0.241433	0.951262	-0.122595
A_tiles_P39720:658	NVISEMNILSSENSSSFHNRIMNKLLMLRTSMAVFLHFETLITKDKSIFPFYK	OAF1	P39720	658	1.06695	0.15901	0.975548	-0.0607406
A_tiles_P39720:671	SSSFHNRIMNKLLMLRTSMAVFLHFETLITKDKSIFPFYKKYFMVSCMDALSL	OAF1	P39720	671	1.00744	0.0181822	0.998249	-0.00430009
A_tiles_P39720:684	MLRTSMAVFLHFETLITKDKSIFPFYKKYFMVSCMDALSLINYFNKFFNGEYR	OAF1	P39720	684	1.09548	0.223739	0.973242	-0.0665457
A_tiles_P39720:697	TLITKDKSIFPFYKKYFMVSCMDALSLINYFNKFFNGEYRHAISSLTSFNVTK	OAF1	P39720	697	0.952516	-0.119361	0.973397	-0.0661565
A_tiles_P39720:710	KKYFMVSCMDALSLINYFNKFFNGEYRHAISSLTSFNVTKFIQLALSSTIFSL	OAF1	P39720	710	1.02542	0.0616006	0.985267	-0.0364181
A_tiles_P39720:723	LINYFNKFFNGEYRHAISSLTSFNVTKFIQLALSSTIFSLLGIILRIGLAIHM	OAF1	P39720	723	0.88997	-0.286005	1.01195	0.0291563
A_tiles_P39720:736	RHAISSLTSFNVTKFIQLALSSTIFSLLGIILRIGLAIHMLSSEVQKLSGTTD	OAF1	P39720	736	1.02429	0.0588897	0.998186	-0.00445473
A_tiles_P39720:749	KFIQLALSSTIFSLLGIILRIGLAIHMLSSEVQKLSGTTDPRIKELNTKVEKF	OAF1	P39720	749	1.03422	0.082558	0.982539	-0.0432209
A_tiles_P39720:762	LLGIILRIGLAIHMLSSEVQKLSGTTDPRIKELNTKVEKFSTLQRDLESALEG	OAF1	P39720	762	0.922926	-0.196792	0.960833	-0.0980315
A_tiles_P39720:77	REKPECGRCVKHGLKCVYDVSKQPAPRIPSKDAIISRLEKDMFYWKDKAMKLL	OAF1	P39720	77	0.956126	-0.110081	1.02759	0.066767
A_tiles_P39720:775	MLSSEVQKLSGTTDPRIKELNTKVEKFSTLQRDLESALEGIYCSASEHLRFTY	OAF1	P39720	775	1.13472	0.310088	1.10421	0.243226
A_tiles_P39720:787	TDPRIKELNTKVEKFSTLQRDLESALEGIYCSASEHLRFTYFPVFKMLALFDV	OAF1	P39720	787	1.0235	0.0569817	0.989612	-0.0256219
A_tiles_P39720:800	KFSTLQRDLESALEGIYCSASEHLRFTYFPVFKMLALFDVIVQRMRKGELWHG	OAF1	P39720	800	0.91149	-0.227385	0.96994	-0.0748866
A_tiles_P39720:813	EGIYCSASEHLRFTYFPVFKMLALFDVIVQRMRKGELWHGIFTMIQMEQMHSR	OAF1	P39720	813	1.04203	0.101006	0.983118	-0.0417741
A_tiles_P39720:826	TYFPVFKMLALFDVIVQRMRKGELWHGIFTMIQMEQMHSRIIKTLSITLGVKL	OAF1	P39720	826	1.0016	0.00393054	1.00728	0.0177973
A_tiles_P39720:839	VIVQRMRKGELWHGIFTMIQMEQMHSRIIKTLSITLGVKLDKKDRLLEELMAC	OAF1	P39720	839	1.01063	0.0259517	0.974118	-0.064339
A_tiles_P39720:852	GIFTMIQMEQMHSRIIKTLSITLGVKLDKKDRLLEELMACNHVANFSVEDIDE	OAF1	P39720	852	0.938418	-0.155947	0.999528	-0.00115752
A_tiles_P39720:865	RIIKTLSITLGVKLDKKDRLLEELMACNHVANFSVEDIDELNRNIKKEIQISS	OAF1	P39720	865	1.02513	0.060886	1.10684	0.249069
A_tiles_P39720:878	LDKKDRLLEELMACNHVANFSVEDIDELNRNIKKEIQISSGLKPPVNTIDLTN	OAF1	P39720	878	1.07408	0.175338	2.07731	1.79374
A_tiles_P39720:891	CNHVANFSVEDIDELNRNIKKEIQISSGLKPPVNTIDLTNGEPFGNAVPTFTK	OAF1	P39720	891	1.3909	0.809558	1.40475	0.833863
A_tiles_P39720:90	LKCVYDVSKQPAPRIPSKDAIISRLEKDMFYWKDKAMKLLTEREVNESGKRSA	OAF1	P39720	90	0.925781	-0.189213	1.05136	0.122888
A_tiles_P39720:904	ELNRNIKKEIQISSGLKPPVNTIDLTNGEPFGNAVPTFTKTWSSSLDNLEKLS	OAF1	P39720	904	1.13953	0.320484	2.24207	1.981
A_tiles_P39720:917	SGLKPPVNTIDLTNGEPFGNAVPTFTKTWSSSLDNLEKLSSAAAVGQSLDYNS	OAF1	P39720	917	1.92461	1.60641	2.2281	1.96567
A_tiles_P39720:929	TNGEPFGNAVPTFTKTWSSSLDNLEKLSSAAAVGQSLDYNSGLRQGPLAGGGS	OAF1	P39720	929	1.6835	1.278	1.62415	1.18993
A_tiles_P39720:942	TKTWSSSLDNLEKLSSAAAVGQSLDYNSGLRQGPLAGGGSKEQTPIAGMNNLN	OAF1	P39720	942	1.17928	0.404597	1.17825	0.402461
A_tiles_P39720:955	LSSAAAVGQSLDYNSGLRQGPLAGGGSKEQTPIAGMNNLNNSINATPIVDNSS	OAF1	P39720	955	1.02611	0.0632523	1.15497	0.353502
A_tiles_P39720:968	NSGLRQGPLAGGGSKEQTPIAGMNNLNNSINATPIVDNSSGSQLPNGFDRGQA	OAF1	P39720	968	0.981349	-0.046194	1.06585	0.156469
A_tiles_P39720:981	SKEQTPIAGMNNLNNSINATPIVDNSSGSQLPNGFDRGQANNTPFPGYFGGLD	OAF1	P39720	981	2.38093	2.12844	2.37038	2.11755
A_tiles_P39961:0	MAAKRGLAKQKSRVTKACDRCHRKKIKCNSKKPCFGCIGSQSKCTYRNQFREP	TOG1	P39961	0	1.05184	0.124005	0.975389	-0.0611404
A_tiles_P39961:104	QPQLYLNLDSKEISSYGGLKSIETEIIGKQSKSLNRFSNAFESNTAQNVSMYF	TOG1	P39961	104	1.69682	1.29733	1.21447	0.476741
A_tiles_P39961:117	SSYGGLKSIETEIIGKQSKSLNRFSNAFESNTAQNVSMYFGVYSPLLYFASTG	TOG1	P39961	117	1.05141	0.123007	1.04497	0.107917
A_tiles_P39961:13	VTKACDRCHRKKIKCNSKKPCFGCIGSQSKCTYRNQFREPIEAFFNYTGSLSN	TOG1	P39961	13	1.38557	0.800128	1.01941	0.0471683
A_tiles_P39961:130	IGKQSKSLNRFSNAFESNTAQNVSMYFGVYSPLLYFASTGISWITKKLISCSN	TOG1	P39961	130	1.16365	0.371861	0.972707	-0.0678972
A_tiles_P39961:143	AFESNTAQNVSMYFGVYSPLLYFASTGISWITKKLISCSNDRETRETIYLFLK	TOG1	P39961	143	0.946992	-0.133632	0.976349	-0.0587272
A_tiles_P39961:156	FGVYSPLLYFASTGISWITKKLISCSNDRETRETIYLFLKFLDASSASHAGPK	TOG1	P39961	156	0.886061	-0.296807	0.964108	-0.0896827
A_tiles_P39961:169	GISWITKKLISCSNDRETRETIYLFLKFLDASSASHAGPKVTSISPLEYYSKL	TOG1	P39961	169	0.943199	-0.14348	0.97488	-0.0624219
A_tiles_P39961:182	NDRETRETIYLFLKFLDASSASHAGPKVTSISPLEYYSKLNGLSCGNDVLIQH	TOG1	P39961	182	0.975178	-0.0616721	1.06273	0.149273
A_tiles_P39961:195	KFLDASSASHAGPKVTSISPLEYYSKLNGLSCGNDVLIQHIMSNISNEIKGNT	TOG1	P39961	195	1.1662	0.377234	1.29961	0.642998
A_tiles_P39961:208	KVTSISPLEYYSKLNGLSCGNDVLIQHIMSNISNEIKGNTNINQTIKFNKPTD	TOG1	P39961	208	0.983818	-0.0400271	1.09825	0.229942
A_tiles_P39961:221	LNGLSCGNDVLIQHIMSNISNEIKGNTNINQTIKFNKPTDWFMYGVQLMEQHH	TOG1	P39961	221	1.4916	0.981055	1.27823	0.602291
A_tiles_P39961:234	HIMSNISNEIKGNTNINQTIKFNKPTDWFMYGVQLMEQHHKALDRKSSKKLLP	TOG1	P39961	234	0.92285	-0.196994	1.11863	0.275058
A_tiles_P39961:247	TNINQTIKFNKPTDWFMYGVQLMEQHHKALDRKSSKKLLPLKYFLEQDELIFC	TOG1	P39961	247	0.94188	-0.146912	1.02575	0.0623909
A_tiles_P39961:26	KCNSKKPCFGCIGSQSKCTYRNQFREPIEAFFNYTGSLSNDLDNAKCSIAKLK	TOG1	P39961	26	1.25225	0.551903	1.05232	0.125117
A_tiles_P39961:260	DWFMYGVQLMEQHHKALDRKSSKKLLPLKYFLEQDELIFCLCLEYFERSLFST	TOG1	P39961	260	0.940654	-0.150108	0.983141	-0.0417168
A_tiles_P39961:273	HKALDRKSSKKLLPLKYFLEQDELIFCLCLEYFERSLFSTMYDLTILKGLVSL	TOG1	P39961	273	0.973186	-0.0666883	0.985884	-0.0348823
A_tiles_P39961:286	PLKYFLEQDELIFCLCLEYFERSLFSTMYDLTILKGLVSLMKHRYWIDDPFVL	TOG1	P39961	286	1.00161	0.00394201	0.975659	-0.0604621
A_tiles_P39961:299	CLCLEYFERSLFSTMYDLTILKGLVSLMKHRYWIDDPFVLGRIISTMSRRSLD	TOG1	P39961	299	0.920247	-0.203923	0.986665	-0.0329374
A_tiles_P39961:312	TMYDLTILKGLVSLMKHRYWIDDPFVLGRIISTMSRRSLDAGLNRWEYYIGQD	TOG1	P39961	312	0.93908	-0.154217	0.96783	-0.0802282
A_tiles_P39961:325	LMKHRYWIDDPFVLGRIISTMSRRSLDAGLNRWEYYIGQDEDTAEEYRKLWWD	TOG1	P39961	325	1.21979	0.487474	1.12617	0.291545
A_tiles_P39961:338	LGRIISTMSRRSLDAGLNRWEYYIGQDEDTAEEYRKLWWDCYWWDRWYSLVTG	TOG1	P39961	338	1.14314	0.328227	0.973775	-0.0652036
A_tiles_P39961:351	DAGLNRWEYYIGQDEDTAEEYRKLWWDCYWWDRWYSLVTGKQPLIPHEMTSCL	TOG1	P39961	351	1.81064	1.45663	1.02598	0.0629267
A_tiles_P39961:364	DEDTAEEYRKLWWDCYWWDRWYSLVTGKQPLIPHEMTSCLFPKDVVGLGVDDS	TOG1	P39961	364	1.60789	1.16526	1.03776	0.0909426
A_tiles_P39961:377	DCYWWDRWYSLVTGKQPLIPHEMTSCLFPKDVVGLGVDDSMDCFTLINLVELD	TOG1	P39961	377	1.38531	0.799683	1.53901	1.05783
A_tiles_P39961:39	SQSKCTYRNQFREPIEAFFNYTGSLSNDLDNAKCSIAKLKAQLPPSAPASLQK	TOG1	P39961	39	1.15204	0.347262	1.08528	0.200793
A_tiles_P39961:390	GKQPLIPHEMTSCLFPKDVVGLGVDDSMDCFTLINLVELDPSKFDICISFGYI	TOG1	P39961	390	1.13976	0.320961	1.80426	1.44797
A_tiles_P39961:403	LFPKDVVGLGVDDSMDCFTLINLVELDPSKFDICISFGYILLTKIITAVFSGL	TOG1	P39961	403	0.950434	-0.12473	1.02017	0.0489955
A_tiles_P39961:416	SMDCFTLINLVELDPSKFDICISFGYILLTKIITAVFSGLLYNRHFTDYRLFA	TOG1	P39961	416	1.01124	0.0274213	0.981528	-0.0457471
A_tiles_P39961:429	DPSKFDICISFGYILLTKIITAVFSGLLYNRHFTDYRLFATPNAKDLNGTARQ	TOG1	P39961	429	0.950209	-0.125311	0.97308	-0.0669543
A_tiles_P39961:442	ILLTKIITAVFSGLLYNRHFTDYRLFATPNAKDLNGTARQLMVEFSKICKIFQ	TOG1	P39961	442	1.00039	0.000963845	0.983977	-0.0396327
A_tiles_P39961:455	LLYNRHFTDYRLFATPNAKDLNGTARQLMVEFSKICKIFQCIQDKLIPFLKQY	TOG1	P39961	455	0.934938	-0.165063	0.977211	-0.0565602
A_tiles_P39961:468	ATPNAKDLNGTARQLMVEFSKICKIFQCIQDKLIPFLKQYSENSNVFELYTHF	TOG1	P39961	468	1.03762	0.0906013	0.971356	-0.0713059
A_tiles_P39961:481	QLMVEFSKICKIFQCIQDKLIPFLKQYSENSNVFELYTHFGFAKVCCFQGMES	TOG1	P39961	481	1.04755	0.113988	0.980544	-0.0482075
A_tiles_P39961:494	QCIQDKLIPFLKQYSENSNVFELYTHFGFAKVCCFQGMESLILRIQNLLQERE	TOG1	P39961	494	0.936145	-0.161899	0.971719	-0.0703897
A_tiles_P39961:507	YSENSNVFELYTHFGFAKVCCFQGMESLILRIQNLLQERERIELDSCVKDIRL	TOG1	P39961	507	0.990303	-0.0239094	0.964245	-0.0893348
A_tiles_P39961:52	PIEAFFNYTGSLSNDLDNAKCSIAKLKAQLPPSAPASLQKGLANICTELEKIQ	TOG1	P39961	52	1.15949	0.363089	1.07341	0.173807
A_tiles_P39961:520	FGFAKVCCFQGMESLILRIQNLLQERERIELDSCVKDIRLQTFEASVDILTDV	TOG1	P39961	520	0.925453	-0.190082	0.975608	-0.0605897
A_tiles_P39961:533	SLILRIQNLLQERERIELDSCVKDIRLQTFEASVDILTDVLKHEDTFYIFRCS	TOG1	P39961	533	0.908813	-0.234599	0.972006	-0.0696656
A_tiles_P39961:546	ERIELDSCVKDIRLQTFEASVDILTDVLKHEDTFYIFRCSWFIYAILMNITLN	TOG1	P39961	546	1.06493	0.154352	0.989649	-0.0255282
A_tiles_P39961:559	LQTFEASVDILTDVLKHEDTFYIFRCSWFIYAILMNITLNFIETPRRNSICYL	TOG1	P39961	559	1.07108	0.168472	0.988746	-0.02777
A_tiles_P39961:572	VLKHEDTFYIFRCSWFIYAILMNITLNFIETPRRNSICYLSLMCRMIASYNDL	TOG1	P39961	572	1.00825	0.0201613	1.01041	0.0254125
A_tiles_P39961:585	SWFIYAILMNITLNFIETPRRNSICYLSLMCRMIASYNDLFVSSGNVNFKGNN	TOG1	P39961	585	0.982788	-0.0425989	0.979135	-0.051735
A_tiles_P39961:598	NFIETPRRNSICYLSLMCRMIASYNDLFVSSGNVNFKGNNAFSKKLENGTAVS	TOG1	P39961	598	0.978174	-0.0541456	0.970578	-0.0732712
A_tiles_P39961:611	LSLMCRMIASYNDLFVSSGNVNFKGNNAFSKKLENGTAVSFILTRICCQMYTR	TOG1	P39961	611	0.975896	-0.0598663	0.985217	-0.036542
A_tiles_P39961:624	LFVSSGNVNFKGNNAFSKKLENGTAVSFILTRICCQMYTRSQKMAKESLFCEL	TOG1	P39961	624	0.989145	-0.0267791	0.975531	-0.0607819
A_tiles_P39961:637	NAFSKKLENGTAVSFILTRICCQMYTRSQKMAKESLFCELKKYGQACSDAGQA	TOG1	P39961	637	0.958116	-0.104979	0.96958	-0.0757965
A_tiles_P39961:65	NDLDNAKCSIAKLKAQLPPSAPASLQKGLANICTELEKIQPQLYLNLDSKEIS	TOG1	P39961	65	1.13441	0.309427	0.990149	-0.024289
A_tiles_P39961:650	SFILTRICCQMYTRSQKMAKESLFCELKKYGQACSDAGQAALDIECIWYRNII	TOG1	P39961	650	1.02768	0.0670033	0.97345	-0.0660217
A_tiles_P39961:663	RSQKMAKESLFCELKKYGQACSDAGQAALDIECIWYRNIIGEHKESSFRKEIL	TOG1	P39961	663	1.19453	0.436127	1.03097	0.0748222
A_tiles_P39961:676	LKKYGQACSDAGQAALDIECIWYRNIIGEHKESSFRKEILSILDREMGDLVNN	TOG1	P39961	676	1.62068	1.18469	1.20035	0.448053
A_tiles_P39961:689	AALDIECIWYRNIIGEHKESSFRKEILSILDREMGDLVNNRVIGVQGKNQEGA	TOG1	P39961	689	1.45067	0.912791	1.02192	0.0531969
A_tiles_P39961:702	IGEHKESSFRKEILSILDREMGDLVNNRVIGVQGKNQEGACYEKLSPSSTSVS	TOG1	P39961	702	0.922249	-0.198591	1.05309	0.126916
A_tiles_P39961:715	LSILDREMGDLVNNRVIGVQGKNQEGACYEKLSPSSTSVSVGMDFCSLENFVT	TOG1	P39961	715	2.13589	1.86196	1.51141	1.01343
A_tiles_P39961:728	NRVIGVQGKNQEGACYEKLSPSSTSVSVGMDFCSLENFVTAESLPDLLNLFWE	TOG1	P39961	728	10.9669	5.87601	5.87462	4.34438
A_tiles_P39961:741	ACYEKLSPSSTSVSVGMDFCSLENFVTAESLPDLLNLFWEDTEFGITKENLGE	TOG1	P39961	741	79.2492	10.7284	24.56	7.85415
A_tiles_P39961:78	KAQLPPSAPASLQKGLANICTELEKIQPQLYLNLDSKEISSYGGLKSIETEII	TOG1	P39961	78	1.39804	0.822124	1.12756	0.294576
A_tiles_P39970:103	ISISNGQISQLGEDLETVENLYNCQPPILSSKAQQNPNPQQVANPSAAIYPSF	ACA1	P39970	103	2.47282	2.22136	2.14157	1.86849
A_tiles_P39970:115	EDLETVENLYNCQPPILSSKAQQNPNPQQVANPSAAIYPSFSSNELQNVPQPH	ACA1	P39970	115	1.64822	1.22603	1.42772	0.873658
A_tiles_P39970:128	PPILSSKAQQNPNPQQVANPSAAIYPSFSSNELQNVPQPHEQATVIPEAAPQT	ACA1	P39970	128	1.03774	0.0908955	1.099	0.231629
A_tiles_P39970:13	FLDGRQNPLLYTDFLSSNKELIYKQPSGPGLVDSAYNFHHQNSLHDRSVQENL	ACA1	P39970	13	1.6991	1.30064	1.33577	0.710323
A_tiles_P39970:141	PQQVANPSAAIYPSFSSNELQNVPQPHEQATVIPEAAPQTGSKNIYAAMTPYD	ACA1	P39970	141	1.3721	0.77616	1.27531	0.596688
A_tiles_P39970:154	SFSSNELQNVPQPHEQATVIPEAAPQTGSKNIYAAMTPYDSNIKLNIPAVAAT	ACA1	P39970	154	1.07439	0.176055	1.1953	0.437717
A_tiles_P39970:167	HEQATVIPEAAPQTGSKNIYAAMTPYDSNIKLNIPAVAATCDIPSATPSIPSG	ACA1	P39970	167	1.05174	0.123782	1.30622	0.655434
A_tiles_P39970:180	TGSKNIYAAMTPYDSNIKLNIPAVAATCDIPSATPSIPSGDSTMNQAYINMQL	ACA1	P39970	180	1.10108	0.23626	1.25414	0.555602
A_tiles_P39970:192	YDSNIKLNIPAVAATCDIPSATPSIPSGDSTMNQAYINMQLRLQAQMQTKAWK	ACA1	P39970	192	1.28047	0.606595	1.08117	0.191476
A_tiles_P39970:205	ATCDIPSATPSIPSGDSTMNQAYINMQLRLQAQMQTKAWKNAQLNVHPCTPAS	ACA1	P39970	205	1.18687	0.420342	1.01484	0.0361372
A_tiles_P39970:218	SGDSTMNQAYINMQLRLQAQMQTKAWKNAQLNVHPCTPASNSSVSSSSSCQNI	ACA1	P39970	218	1.15534	0.354279	0.984461	-0.0384255
A_tiles_P39970:231	QLRLQAQMQTKAWKNAQLNVHPCTPASNSSVSSSSSCQNINDHNIENQSVHSS	ACA1	P39970	231	1.01663	0.0404776	0.980053	-0.049437
A_tiles_P39970:244	KNAQLNVHPCTPASNSSVSSSSSCQNINDHNIENQSVHSSISHGVNHHTVNNS	ACA1	P39970	244	0.950331	-0.124998	1.01483	0.0361151
A_tiles_P39970:256	ASNSSVSSSSSCQNINDHNIENQSVHSSISHGVNHHTVNNSCQNAELNISSSL	ACA1	P39970	256	1.08342	0.196587	1.10744	0.250393
A_tiles_P39970:26	FLSSNKELIYKQPSGPGLVDSAYNFHHQNSLHDRSVQENLGPMFQPFGVDISH	ACA1	P39970	26	2.48291	2.23135	2.0187	1.72351
A_tiles_P39970:269	NINDHNIENQSVHSSISHGVNHHTVNNSCQNAELNISSSLPYESKCPDVNLTH	ACA1	P39970	269	1.29043	0.6256	1.1964	0.439958
A_tiles_P39970:282	SSISHGVNHHTVNNSCQNAELNISSSLPYESKCPDVNLTHANSKPQYKDATSA	ACA1	P39970	282	1.07322	0.173373	1.11966	0.27731
A_tiles_P39970:295	NSCQNAELNISSSLPYESKCPDVNLTHANSKPQYKDATSALKNNINSEKDVHT	ACA1	P39970	295	1.05191	0.124173	0.98658	-0.03315
A_tiles_P39970:308	LPYESKCPDVNLTHANSKPQYKDATSALKNNINSEKDVHTAPFSSMHTTATFQ	ACA1	P39970	308	1.11464	0.266283	1.04505	0.108108
A_tiles_P39970:321	HANSKPQYKDATSALKNNINSEKDVHTAPFSSMHTTATFQIKQEARPQKIENN	ACA1	P39970	321	0.894561	-0.273381	0.971951	-0.0698031
A_tiles_P39970:333	SALKNNINSEKDVHTAPFSSMHTTATFQIKQEARPQKIENNTAGLKDGAKAWK	ACA1	P39970	333	0.979227	-0.0515055	0.959845	-0.100555
A_tiles_P39970:346	HTAPFSSMHTTATFQIKQEARPQKIENNTAGLKDGAKAWKRARLLERNRIAAS	ACA1	P39970	346	0.986253	-0.0339625	0.963132	-0.0921683
A_tiles_P39970:359	FQIKQEARPQKIENNTAGLKDGAKAWKRARLLERNRIAASKCRQRKKMSQLQL	ACA1	P39970	359	1.00562	0.0137595	0.96222	-0.0944927
A_tiles_P39970:372	NNTAGLKDGAKAWKRARLLERNRIAASKCRQRKKMSQLQLQREFDQISKENTM	ACA1	P39970	372	1.01777	0.0432195	0.952377	-0.119719
A_tiles_P39970:38	PSGPGLVDSAYNFHHQNSLHDRSVQENLGPMFQPFGVDISHLPITNPPIFQSS	ACA1	P39970	38	1.44617	0.905163	2.87259	2.58903
A_tiles_P39970:385	KRARLLERNRIAASKCRQRKKMSQLQLQREFDQISKENTMMKKKIENYEKLVQ	ACA1	P39970	385	0.885083	-0.299516	0.935581	-0.163376
A_tiles_P39970:398	SKCRQRKKMSQLQLQREFDQISKENTMMKKKIENYEKLVQKMKKISRLHMQEC	ACA1	P39970	398	1.13673	0.314438	0.940124	-0.151493
A_tiles_P39970:410	QLQREFDQISKENTMMKKKIENYEKLVQKMKKISRLHMQECTINGGNNSYQSL	ACA1	P39970	410	1.1885	0.423709	0.971077	-0.0720098
A_tiles_P39970:423	TMMKKKIENYEKLVQKMKKISRLHMQECTINGGNNSYQSLQNKDSDVNGFLKM	ACA1	P39970	423	0.905693	-0.243037	0.968211	-0.0792626
A_tiles_P39970:436	VQKMKKISRLHMQECTINGGNNSYQSLQNKDSDVNGFLKMIEEMIRSSSLYDE	ACA1	P39970	436	1.03152	0.0761358	1.54416	1.06602
A_tiles_P39970:51	HHQNSLHDRSVQENLGPMFQPFGVDISHLPITNPPIFQSSLPAFDQPVYKRRI	ACA1	P39970	51	1.07895	0.186437	1.56121	1.09297
A_tiles_P39970:64	NLGPMFQPFGVDISHLPITNPPIFQSSLPAFDQPVYKRRISISNGQISQLGED	ACA1	P39970	64	2.45135	2.19996	1.86467	1.52877
A_tiles_P39970:77	SHLPITNPPIFQSSLPAFDQPVYKRRISISNGQISQLGEDLETVENLYNCQPP	ACA1	P39970	77	1.97226	1.66641	2.11048	1.83261
A_tiles_P39970:90	SLPAFDQPVYKRRISISNGQISQLGEDLETVENLYNCQPPILSSKAQQNPNPQ	ACA1	P39970	90	1.57964	1.12176	1.66946	1.25746
A_tiles_P40467:0	MPEQAQQGEQSVKRRRVTRACDECRKKKVKCDGQQPCIHCTVYSYECTYKKPT	ASG1	P40467	0	1.16347	0.371481	0.990156	-0.0242716
A_tiles_P40467:103	ASTIPASNNPSKPRKYKTKSTRLQSKIDRYKQIFDEVFPQLPDIDNLDIPVFL	ASG1	P40467	103	1.72191	1.33336	3.77645	3.26026
A_tiles_P40467:115	PRKYKTKSTRLQSKIDRYKQIFDEVFPQLPDIDNLDIPVFLQIFHNFKRDSQS	ASG1	P40467	115	1.04955	0.118657	1.62196	1.18664
A_tiles_P40467:128	KIDRYKQIFDEVFPQLPDIDNLDIPVFLQIFHNFKRDSQSFLDDTVKEYTLIV	ASG1	P40467	128	1.2692	0.584898	1.21272	0.473206
A_tiles_P40467:13	RRRVTRACDECRKKKVKCDGQQPCIHCTVYSYECTYKKPTKRTQNSGNSGVLT	ASG1	P40467	13	1.19901	0.44531	0.967899	-0.080053
A_tiles_P40467:141	PQLPDIDNLDIPVFLQIFHNFKRDSQSFLDDTVKEYTLIVNDSSSPIQPVLSS	ASG1	P40467	141	1.35291	0.741605	1.75562	1.38092
A_tiles_P40467:154	FLQIFHNFKRDSQSFLDDTVKEYTLIVNDSSSPIQPVLSSNSKNSTPDEFLPN	ASG1	P40467	154	1.29031	0.625379	1.72007	1.33072
A_tiles_P40467:167	SFLDDTVKEYTLIVNDSSSPIQPVLSSNSKNSTPDEFLPNMKSDSNSASSNRE	ASG1	P40467	167	1.3469	0.730681	1.50688	1.00607
A_tiles_P40467:180	VNDSSSPIQPVLSSNSKNSTPDEFLPNMKSDSNSASSNREQDSVDTYSNIPVG	ASG1	P40467	180	1.08256	0.194637	1.05082	0.121614
A_tiles_P40467:192	SSNSKNSTPDEFLPNMKSDSNSASSNREQDSVDTYSNIPVGREIKIILPPKAI	ASG1	P40467	192	1.06746	0.16018	1.03161	0.076361
A_tiles_P40467:205	PNMKSDSNSASSNREQDSVDTYSNIPVGREIKIILPPKAIALQFVKSTWEHCC	ASG1	P40467	205	1.03066	0.0740846	1.00686	0.0167708
A_tiles_P40467:218	REQDSVDTYSNIPVGREIKIILPPKAIALQFVKSTWEHCCVLLRFYHRPSFIR	ASG1	P40467	218	0.943636	-0.142342	0.997791	-0.00542655
A_tiles_P40467:231	VGREIKIILPPKAIALQFVKSTWEHCCVLLRFYHRPSFIRQLDELYETDPNNY	ASG1	P40467	231	1.04676	0.112138	0.96548	-0.0861926
A_tiles_P40467:244	IALQFVKSTWEHCCVLLRFYHRPSFIRQLDELYETDPNNYTSKQMQFLPLCYA	ASG1	P40467	244	0.999055	-0.00231876	0.972269	-0.0690009
A_tiles_P40467:257	CVLLRFYHRPSFIRQLDELYETDPNNYTSKQMQFLPLCYAAIAVGALFSKSIV	ASG1	P40467	257	0.971214	-0.0716645	0.979222	-0.0515166
A_tiles_P40467:26	KKVKCDGQQPCIHCTVYSYECTYKKPTKRTQNSGNSGVLTLGNVTTGPSSSTV	ASG1	P40467	26	1.02966	0.0717123	0.968154	-0.0794076
A_tiles_P40467:269	IRQLDELYETDPNNYTSKQMQFLPLCYAAIAVGALFSKSIVSNDSSREKFLQD	ASG1	P40467	269	1.02759	0.0667696	1.0206	0.0500311
A_tiles_P40467:282	NYTSKQMQFLPLCYAAIAVGALFSKSIVSNDSSREKFLQDEGYKYFIAARKLI	ASG1	P40467	282	1.00435	0.0106522	0.976819	-0.0575462
A_tiles_P40467:295	YAAIAVGALFSKSIVSNDSSREKFLQDEGYKYFIAARKLIDITNARDLNSIQA	ASG1	P40467	295	1.01785	0.0434025	0.967136	-0.0819882
A_tiles_P40467:308	IVSNDSSREKFLQDEGYKYFIAARKLIDITNARDLNSIQAILMLIIFLQCSAR	ASG1	P40467	308	1.12315	0.28496	0.995527	-0.0109995
A_tiles_P40467:321	DEGYKYFIAARKLIDITNARDLNSIQAILMLIIFLQCSARLSTCYTYIGVAMR	ASG1	P40467	321	1.07345	0.173904	0.997596	-0.00590618
A_tiles_P40467:334	IDITNARDLNSIQAILMLIIFLQCSARLSTCYTYIGVAMRSALRAGFHRKLSP	ASG1	P40467	334	1.1036	0.241858	1.01544	0.0375856
A_tiles_P40467:346	QAILMLIIFLQCSARLSTCYTYIGVAMRSALRAGFHRKLSPNSGFSPIEIEMR	ASG1	P40467	346	1.21059	0.468901	0.984828	-0.0375108
A_tiles_P40467:359	ARLSTCYTYIGVAMRSALRAGFHRKLSPNSGFSPIEIEMRKRLFYTIYKLDVY	ASG1	P40467	359	0.969457	-0.0761083	0.988831	-0.027558
A_tiles_P40467:372	MRSALRAGFHRKLSPNSGFSPIEIEMRKRLFYTIYKLDVYINAMLGLPRSISP	ASG1	P40467	372	0.920088	-0.204349	0.971626	-0.0706239
A_tiles_P40467:38	HCTVYSYECTYKKPTKRTQNSGNSGVLTLGNVTTGPSSSTVVAAAASNPNKLL	ASG1	P40467	38	1.06592	0.156638	0.977089	-0.0568681
A_tiles_P40467:385	SPNSGFSPIEIEMRKRLFYTIYKLDVYINAMLGLPRSISPDDFDQTLPLDLSD	ASG1	P40467	385	0.932587	-0.171242	1.03003	0.0726027
A_tiles_P40467:398	RKRLFYTIYKLDVYINAMLGLPRSISPDDFDQTLPLDLSDENITEVAYLPENQ	ASG1	P40467	398	1.09858	0.230673	1.14297	0.327866
A_tiles_P40467:411	YINAMLGLPRSISPDDFDQTLPLDLSDENITEVAYLPENQHSVLSSTGISNEH	ASG1	P40467	411	11.7744	6.0503	3.16206	2.8246
A_tiles_P40467:423	SPDDFDQTLPLDLSDENITEVAYLPENQHSVLSSTGISNEHTKLFLILNEIIS	ASG1	P40467	423	2.59001	2.33497	1.96067	1.65196
A_tiles_P40467:436	SDENITEVAYLPENQHSVLSSTGISNEHTKLFLILNEIISELYPIKKTSNIIS	ASG1	P40467	436	1.01625	0.0395572	1.08139	0.191976
A_tiles_P40467:449	NQHSVLSSTGISNEHTKLFLILNEIISELYPIKKTSNIISHETVTSLELKLRN	ASG1	P40467	449	0.922774	-0.197194	0.980688	-0.0478454
A_tiles_P40467:462	EHTKLFLILNEIISELYPIKKTSNIISHETVTSLELKLRNWLDSLPKELIPNA	ASG1	P40467	462	1.05577	0.13315	0.98196	-0.0446664
A_tiles_P40467:475	SELYPIKKTSNIISHETVTSLELKLRNWLDSLPKELIPNAENIDPEYERANRL	ASG1	P40467	475	1.28605	0.617258	1.25116	0.549766
A_tiles_P40467:488	SHETVTSLELKLRNWLDSLPKELIPNAENIDPEYERANRLLHLSFLHVQIILY	ASG1	P40467	488	1.02885	0.0697829	0.990058	-0.024516
A_tiles_P40467:500	RNWLDSLPKELIPNAENIDPEYERANRLLHLSFLHVQIILYRPFIHYLSRNMN	ASG1	P40467	500	1.0893	0.209875	0.991646	-0.0205841
A_tiles_P40467:51	PTKRTQNSGNSGVLTLGNVTTGPSSSTVVAAAASNPNKLLSNIKTERAILPGA	ASG1	P40467	51	0.980899	-0.0473195	0.931743	-0.173461
A_tiles_P40467:513	NAENIDPEYERANRLLHLSFLHVQIILYRPFIHYLSRNMNAENVDPLCYRRAR	ASG1	P40467	513	1.03617	0.087189	0.974271	-0.0639538
A_tiles_P40467:526	RLLHLSFLHVQIILYRPFIHYLSRNMNAENVDPLCYRRARNSIAVARTVIKLA	ASG1	P40467	526	1.08762	0.206088	1.00492	0.0120323
A_tiles_P40467:539	LYRPFIHYLSRNMNAENVDPLCYRRARNSIAVARTVIKLAKEMVSNNLLTGSY	ASG1	P40467	539	0.972178	-0.0692307	0.966887	-0.0826209
A_tiles_P40467:552	NAENVDPLCYRRARNSIAVARTVIKLAKEMVSNNLLTGSYWYACYTIFYSVAG	ASG1	P40467	552	1.08377	0.197376	0.984347	-0.0387105
A_tiles_P40467:565	RNSIAVARTVIKLAKEMVSNNLLTGSYWYACYTIFYSVAGLLFYIHEAQLPDK	ASG1	P40467	565	1.06591	0.156604	0.978644	-0.0529651
A_tiles_P40467:577	LAKEMVSNNLLTGSYWYACYTIFYSVAGLLFYIHEAQLPDKDSAREYYDILKD	ASG1	P40467	577	1.05158	0.123405	0.961025	-0.0975414
A_tiles_P40467:590	SYWYACYTIFYSVAGLLFYIHEAQLPDKDSAREYYDILKDAETGRSVLIQLKD	ASG1	P40467	590	1.01372	0.0334223	0.966586	-0.0833847
A_tiles_P40467:603	AGLLFYIHEAQLPDKDSAREYYDILKDAETGRSVLIQLKDSSMAASRTYNLLN	ASG1	P40467	603	1.10874	0.25326	1.10382	0.242363
A_tiles_P40467:616	DKDSAREYYDILKDAETGRSVLIQLKDSSMAASRTYNLLNQIFEKLNSKTIQL	ASG1	P40467	616	0.96073	-0.0982941	1.00861	0.0210324
A_tiles_P40467:629	DAETGRSVLIQLKDSSMAASRTYNLLNQIFEKLNSKTIQLTALHSSPSNESAF	ASG1	P40467	629	0.959161	-0.102306	1.00283	0.00694222
A_tiles_P40467:64	LTLGNVTTGPSSSTVVAAAASNPNKLLSNIKTERAILPGASTIPASNNPSKPR	ASG1	P40467	64	1.01155	0.0281827	0.934995	-0.164913
A_tiles_P40467:642	DSSMAASRTYNLLNQIFEKLNSKTIQLTALHSSPSNESAFLVTNNSSALKPHL	ASG1	P40467	642	0.970694	-0.0729798	0.996913	-0.00758545
A_tiles_P40467:654	LNQIFEKLNSKTIQLTALHSSPSNESAFLVTNNSSALKPHLGDSLQPPVFFSS	ASG1	P40467	654	1.01272	0.0310167	1.04012	0.0965163
A_tiles_P40467:667	QLTALHSSPSNESAFLVTNNSSALKPHLGDSLQPPVFFSSQDTKNSFSLAKSE	ASG1	P40467	667	1.20575	0.459069	1.29858	0.641037
A_tiles_P40467:680	AFLVTNNSSALKPHLGDSLQPPVFFSSQDTKNSFSLAKSEESTNDYAMANYLN	ASG1	P40467	680	2.31929	2.06409	1.43536	0.886764
A_tiles_P40467:693	HLGDSLQPPVFFSSQDTKNSFSLAKSEESTNDYAMANYLNNTPISENPLNEAQ	ASG1	P40467	693	3.2558	2.89628	2.27692	2.01885
A_tiles_P40467:706	SQDTKNSFSLAKSEESTNDYAMANYLNNTPISENPLNEAQQQDQVSQGTTNMS	ASG1	P40467	706	1.39526	0.81724	1.38367	0.796776
A_tiles_P40467:719	EESTNDYAMANYLNNTPISENPLNEAQQQDQVSQGTTNMSNERDPNNFLSIDI	ASG1	P40467	719	4.50001	3.69035	2.06823	1.78299
A_tiles_P40467:731	LNNTPISENPLNEAQQQDQVSQGTTNMSNERDPNNFLSIDIRLDNNGQSNILD	ASG1	P40467	731	1.73796	1.35612	1.61457	1.17542
A_tiles_P40467:744	AQQQDQVSQGTTNMSNERDPNNFLSIDIRLDNNGQSNILDATDDVFIRNDGDI	ASG1	P40467	744	4.4922	3.68609	3.43805	3.02992
A_tiles_P40467:757	MSNERDPNNFLSIDIRLDNNGQSNILDATDDVFIRNDGDIPTNSAFDFSSSKS	ASG1	P40467	757	6.6475	4.64764	6.847	4.72019
A_tiles_P40467:77	TVVAAAASNPNKLLSNIKTERAILPGASTIPASNNPSKPRKYKTKSTRLQSKI	ASG1	P40467	77	0.880582	-0.312024	0.924219	-0.193356
A_tiles_P40467:770	DIRLDNNGQSNILDATDDVFIRNDGDIPTNSAFDFSSSKSNASNNSNPDTINN	ASG1	P40467	770	1.68102	1.27439	2.8973	2.61005
A_tiles_P40467:783	DATDDVFIRNDGDIPTNSAFDFSSSKSNASNNSNPDTINNNYNNVSGKNNNNN	ASG1	P40467	783	1.21928	0.486449	1.70326	1.30664
A_tiles_P40467:796	IPTNSAFDFSSSKSNASNNSNPDTINNNYNNVSGKNNNNNNITNNSNNNHNNN	ASG1	P40467	796	1.23195	0.511814	1.05898	0.140612
A_tiles_P40467:808	KSNASNNSNPDTINNNYNNVSGKNNNNNNITNNSNNNHNNNNNDNNNNNNNNN	ASG1	P40467	808	0.907887	-0.2371	0.98603	-0.0345169
A_tiles_P40467:821	NNNYNNVSGKNNNNNNITNNSNNNHNNNNNDNNNNNNNNNNNNNNNNNSGNSS	ASG1	P40467	821	0.704192	-0.860476	1.00969	0.0236515
A_tiles_P40467:834	NNNITNNSNNNHNNNNNDNNNNNNNNNNNNNNNNNSGNSSNNNNNNNNNKNNN	ASG1	P40467	834	1.03206	0.0774314	0.997365	-0.00647283
A_tiles_P40467:847	NNNNDNNNNNNNNNNNNNNNNNSGNSSNNNNNNNNNKNNNDFGIKIDNNSPSY	ASG1	P40467	847	1.02261	0.0548489	1.00994	0.0242561
A_tiles_P40467:860	NNNNNNNNNSGNSSNNNNNNNNNKNNNDFGIKIDNNSPSYEGFPQLQIPLSQD	ASG1	P40467	860	1.4424	0.898763	1.20307	0.453612
A_tiles_P40467:873	SNNNNNNNNNKNNNDFGIKIDNNSPSYEGFPQLQIPLSQDNLNIEDKEEMSPN	ASG1	P40467	873	1.59133	1.13986	1.31986	0.680933
A_tiles_P40467:885	NNDFGIKIDNNSPSYEGFPQLQIPLSQDNLNIEDKEEMSPNIEIKNEQNMTDS	ASG1	P40467	885	1.48999	0.978412	1.52	1.02733
A_tiles_P40467:898	SYEGFPQLQIPLSQDNLNIEDKEEMSPNIEIKNEQNMTDSNDILGVFDQLDAQ	ASG1	P40467	898	4.57331	3.73	4.58804	3.73789
A_tiles_P40467:90	LSNIKTERAILPGASTIPASNNPSKPRKYKTKSTRLQSKIDRYKQIFDEVFPQ	ASG1	P40467	90	1.09719	0.227585	0.996061	-0.00968471
A_tiles_P40467:911	QDNLNIEDKEEMSPNIEIKNEQNMTDSNDILGVFDQLDAQLFGKYLPLNYPSE	ASG1	P40467	911	22.7113	7.66215	23.6007	7.7564
A_tiles_P46676:0	MSENTTAPSDNITNEQRLPSGPKDDVDTLALTSAQNQANSLRKLDTDANAKAL	SUM1	P46676	0	0.93256	-0.171313	0.964098	-0.0897079
A_tiles_P46676:1009	FPHNETLPALGQDGINEDNLNETIDNMLIFDFLDDGSENNQVKYSRIIPPDIR	SUM1	P46676	1009	43.162	9.23757	34.9417	8.71918
A_tiles_P46676:103	TKQCNDLKTALLSKDTSLTDSVQDLFNSLKVLSHNQSVLENKLDDVMKNQVNT	SUM1	P46676	103	1.07699	0.181977	1.3139	0.669828
A_tiles_P46676:116	KDTSLTDSVQDLFNSLKVLSHNQSVLENKLDDVMKNQVNTDILVNNLNERLNK	SUM1	P46676	116	1.02496	0.0604802	1.65071	1.22973
A_tiles_P46676:129	NSLKVLSHNQSVLENKLDDVMKNQVNTDILVNNLNERLNKLSTMLQNTSKVNH	SUM1	P46676	129	1.13153	0.303179	1.0272	0.065853
A_tiles_P46676:13	NEQRLPSGPKDDVDTLALTSAQNQANSLRKLDTDANAKALPSITDIPVSDDSD	SUM1	P46676	13	0.902547	-0.251574	0.969578	-0.0758012
A_tiles_P46676:142	ENKLDDVMKNQVNTDILVNNLNERLNKLSTMLQNTSKVNHSNLLIENSSNNTS	SUM1	P46676	142	0.920716	-0.202672	1.02066	0.0501762
A_tiles_P46676:155	TDILVNNLNERLNKLSTMLQNTSKVNHSNLLIENSSNNTSSQHNTSSSRRGPG	SUM1	P46676	155	0.856607	-0.379753	0.961791	-0.0955858
A_tiles_P46676:168	KLSTMLQNTSKVNHSNLLIENSSNNTSSQHNTSSSRRGPGRPRKDASTSTMNK	SUM1	P46676	168	0.773606	-0.62981	0.929416	-0.179599
A_tiles_P46676:181	HSNLLIENSSNNTSSQHNTSSSRRGPGRPRKDASTSTMNKLVSNAASVNLKSA	SUM1	P46676	181	0.870053	-0.34154	0.948053	-0.130885
A_tiles_P46676:194	SSQHNTSSSRRGPGRPRKDASTSTMNKLVSNAASVNLKSASNQGAPFSPVNIT	SUM1	P46676	194	0.999251	-0.00183784	0.95307	-0.117936
A_tiles_P46676:207	GRPRKDASTSTMNKLVSNAASVNLKSASNQGAPFSPVNITLPTAVVQTSKSKR	SUM1	P46676	207	0.830258	-0.45641	0.944005	-0.141384
A_tiles_P46676:220	KLVSNAASVNLKSASNQGAPFSPVNITLPTAVVQTSKSKRYFVEPSTKQESLL	SUM1	P46676	220	1.06734	0.159904	0.997872	-0.00522747
A_tiles_P46676:233	ASNQGAPFSPVNITLPTAVVQTSKSKRYFVEPSTKQESLLLSAPSSSRDDADM	SUM1	P46676	233	0.992154	-0.0193278	0.994723	-0.0129812
A_tiles_P46676:246	TLPTAVVQTSKSKRYFVEPSTKQESLLLSAPSSSRDDADMSLTSVPQRTNNEN	SUM1	P46676	246	0.923197	-0.19607	0.957585	-0.106339
A_tiles_P46676:259	RYFVEPSTKQESLLLSAPSSSRDDADMSLTSVPQRTNNENGKERPSTANSSSI	SUM1	P46676	259	0.920909	-0.202159	0.981872	-0.0448876
A_tiles_P46676:26	DTLALTSAQNQANSLRKLDTDANAKALPSITDIPVSDDSDIKRQVGSGFGSNP	SUM1	P46676	26	0.968594	-0.0782917	1.03854	0.0927855
A_tiles_P46676:272	LLSAPSSSRDDADMSLTSVPQRTNNENGKERPSTANSSSITPTPVTPNNLIQI	SUM1	P46676	272	1.0733	0.173559	0.975553	-0.0607278
A_tiles_P46676:285	MSLTSVPQRTNNENGKERPSTANSSSITPTPVTPNNLIQIKRKRGRPPKKRTV	SUM1	P46676	285	0.871699	-0.336901	0.936635	-0.160615
A_tiles_P46676:298	NGKERPSTANSSSITPTPVTPNNLIQIKRKRGRPPKKRTVETMISNSTDTIDK	SUM1	P46676	298	0.84553	-0.411688	0.939095	-0.154179
A_tiles_P46676:310	SITPTPVTPNNLIQIKRKRGRPPKKRTVETMISNSTDTIDKSDASNRIKNEIP	SUM1	P46676	310	0.791238	-0.574518	0.941218	-0.148637
A_tiles_P46676:323	QIKRKRGRPPKKRTVETMISNSTDTIDKSDASNRIKNEIPINSLLPSSKFHQI	SUM1	P46676	323	0.896219	-0.268839	0.945864	-0.136558
A_tiles_P46676:336	TVETMISNSTDTIDKSDASNRIKNEIPINSLLPSSKFHQIPSSPSNPVSQPAP	SUM1	P46676	336	0.954456	-0.114371	0.999653	-0.000852561
A_tiles_P46676:349	DKSDASNRIKNEIPINSLLPSSKFHQIPSSPSNPVSQPAPVRTSRSATQEIDI	SUM1	P46676	349	0.925704	-0.189417	0.985299	-0.0363373
A_tiles_P46676:362	PINSLLPSSKFHQIPSSPSNPVSQPAPVRTSRSATQEIDIKSLELASLISTNG	SUM1	P46676	362	1.12006	0.278188	1.11219	0.260891
A_tiles_P46676:375	IPSSPSNPVSQPAPVRTSRSATQEIDIKSLELASLISTNGDPNAEDSNTTDTV	SUM1	P46676	375	1.04791	0.114826	1.01365	0.0332555
A_tiles_P46676:388	PVRTSRSATQEIDIKSLELASLISTNGDPNAEDSNTTDTVHNNVEGKVNVEEN	SUM1	P46676	388	0.925622	-0.189635	0.996898	-0.00762296
A_tiles_P46676:39	SLRKLDTDANAKALPSITDIPVSDDSDIKRQVGSGFGSNPLHIKDSEAFPHSS	SUM1	P46676	39	0.945255	-0.138137	1.18656	0.419709
A_tiles_P46676:401	IKSLELASLISTNGDPNAEDSNTTDTVHNNVEGKVNVEENKTEKEKIITIKSS	SUM1	P46676	401	0.879252	-0.315733	0.937778	-0.157621
A_tiles_P46676:414	GDPNAEDSNTTDTVHNNVEGKVNVEENKTEKEKIITIKSSSENSGNNTTNNNN	SUM1	P46676	414	0.908537	-0.235346	0.923839	-0.194365
A_tiles_P46676:427	VHNNVEGKVNVEENKTEKEKIITIKSSSENSGNNTTNNNNTDNVIKFSANSDI	SUM1	P46676	427	0.85333	-0.389156	0.953145	-0.117743
A_tiles_P46676:440	NKTEKEKIITIKSSSENSGNNTTNNNNTDNVIKFSANSDINSDIRRLMVNDQF	SUM1	P46676	440	0.949377	-0.127462	1.05686	0.135689
A_tiles_P46676:453	SSENSGNNTTNNNNTDNVIKFSANSDINSDIRRLMVNDQFSLSYDASGNITVK	SUM1	P46676	453	1.87907	1.54765	1.45003	0.911704
A_tiles_P46676:479	INSDIRRLMVNDQFSLSYDASGNITVKLPPVSSPAAATAAAAAAVTSEMNRQQ	SUM1	P46676	479	1.05687	0.135721	1.00675	0.0165172
A_tiles_P46676:492	FSLSYDASGNITVKLPPVSSPAAATAAAAAAVTSEMNRQQRELDKRRDSREKM	SUM1	P46676	492	1.03315	0.0800069	0.987354	-0.0312259
A_tiles_P46676:505	KLPPVSSPAAATAAAAAAVTSEMNRQQRELDKRRDSREKMLVNMKYNDRDKAK	SUM1	P46676	505	0.840059	-0.427614	0.931034	-0.17533
A_tiles_P46676:517	AAAAAAVTSEMNRQQRELDKRRDSREKMLVNMKYNDRDKAKSFMESNKKLLKA	SUM1	P46676	517	0.943804	-0.141905	0.925396	-0.190233
A_tiles_P46676:52	LPSITDIPVSDDSDIKRQVGSGFGSNPLHIKDSEAFPHSSIEALKEGMDKVTK	SUM1	P46676	52	1.02992	0.072334	1.17742	0.400734
A_tiles_P46676:530	QQRELDKRRDSREKMLVNMKYNDRDKAKSFMESNKKLLKAMKEEERRKRMTSI	SUM1	P46676	530	0.96877	-0.0778459	0.919653	-0.205508
A_tiles_P46676:543	KMLVNMKYNDRDKAKSFMESNKKLLKAMKEEERRKRMTSIIHDNHLNLNLNEI	SUM1	P46676	543	0.972586	-0.0682013	0.946879	-0.133925
A_tiles_P46676:556	AKSFMESNKKLLKAMKEEERRKRMTSIIHDNHLNLNLNEISTRSKIKSAEKPT	SUM1	P46676	556	0.951056	-0.123125	0.927012	-0.185953
A_tiles_P46676:569	AMKEEERRKRMTSIIHDNHLNLNLNEISTRSKIKSAEKPTTKGSSMSPKPRSA	SUM1	P46676	569	0.947965	-0.131114	0.918699	-0.208053
A_tiles_P46676:582	IIHDNHLNLNLNEISTRSKIKSAEKPTTKGSSMSPKPRSASISGISDHQQEGY	SUM1	P46676	582	0.966595	-0.0833616	0.9523	-0.119919
A_tiles_P46676:595	ISTRSKIKSAEKPTTKGSSMSPKPRSASISGISDHQQEGYQPLEQEKLVDIDN	SUM1	P46676	595	1.04106	0.0987366	0.970149	-0.0743569
A_tiles_P46676:608	TTKGSSMSPKPRSASISGISDHQQEGYQPLEQEKLVDIDNEGSNANSDSLKMG	SUM1	P46676	608	0.98335	-0.0411957	0.989112	-0.02686
A_tiles_P46676:621	ASISGISDHQQEGYQPLEQEKLVDIDNEGSNANSDSLKMGLTISAADTVHKVG	SUM1	P46676	621	0.85185	-0.393415	1.12919	0.298119
A_tiles_P46676:634	YQPLEQEKLVDIDNEGSNANSDSLKMGLTISAADTVHKVGIQSMLNSGEEAIT	SUM1	P46676	634	0.799918	-0.547748	1.15377	0.350955
A_tiles_P46676:647	NEGSNANSDSLKMGLTISAADTVHKVGIQSMLNSGEEAITKENAEYERKTPGD	SUM1	P46676	647	0.876563	-0.32325	0.96349	-0.0912548
A_tiles_P46676:65	DIKRQVGSGFGSNPLHIKDSEAFPHSSIEALKEGMDKVTKQCNDLKTALLSKD	SUM1	P46676	65	1.08094	0.190965	1.04418	0.106069
A_tiles_P46676:660	GLTISAADTVHKVGIQSMLNSGEEAITKENAEYERKTPGDEETTTFVPLENSQ	SUM1	P46676	660	0.831598	-0.452451	1.05379	0.128553
A_tiles_P46676:673	GIQSMLNSGEEAITKENAEYERKTPGDEETTTFVPLENSQPSDTIRKRTAGDD	SUM1	P46676	673	0.842432	-0.420693	1.00555	0.0135864
A_tiles_P46676:686	TKENAEYERKTPGDEETTTFVPLENSQPSDTIRKRTAGDDGALDQTENTSISP	SUM1	P46676	686	0.947751	-0.131667	0.987768	-0.0301965
A_tiles_P46676:699	DEETTTFVPLENSQPSDTIRKRTAGDDGALDQTENTSISPKKRRTEDHTKGEE	SUM1	P46676	699	1.17186	0.389112	0.987134	-0.0317723
A_tiles_P46676:711	SQPSDTIRKRTAGDDGALDQTENTSISPKKRRTEDHTKGEEDEGERGVGNSGT	SUM1	P46676	711	1.10205	0.238423	0.941903	-0.146852
A_tiles_P46676:724	DDGALDQTENTSISPKKRRTEDHTKGEEDEGERGVGNSGTLATVENVSGDISA	SUM1	P46676	724	0.901852	-0.253464	0.960723	-0.0983112
A_tiles_P46676:737	SPKKRRTEDHTKGEEDEGERGVGNSGTLATVENVSGDISADLSKGTSSIHNDT	SUM1	P46676	737	0.856747	-0.379351	0.931872	-0.173123
A_tiles_P46676:750	EEDEGERGVGNSGTLATVENVSGDISADLSKGTSSIHNDTESANDSSNGNGNL	SUM1	P46676	750	0.88495	-0.299884	0.990875	-0.0224917
A_tiles_P46676:763	TLATVENVSGDISADLSKGTSSIHNDTESANDSSNGNGNLGLGTESRNTLLTA	SUM1	P46676	763	1.01124	0.027415	1.01419	0.0345741
A_tiles_P46676:776	ADLSKGTSSIHNDTESANDSSNGNGNLGLGTESRNTLLTATPIELICREGFFY	SUM1	P46676	776	1.43309	0.882871	1.20633	0.460254
A_tiles_P46676:78	PLHIKDSEAFPHSSIEALKEGMDKVTKQCNDLKTALLSKDTSLTDSVQDLFNS	SUM1	P46676	78	1.19055	0.427932	1.41368	0.849418
A_tiles_P46676:789	TESANDSSNGNGNLGLGTESRNTLLTATPIELICREGFFYRRDIPDVPITTGA	SUM1	P46676	789	1.35131	0.738701	1.26511	0.576973
A_tiles_P46676:802	LGLGTESRNTLLTATPIELICREGFFYRRDIPDVPITTGAYLEFKFKAKEEEL	SUM1	P46676	802	1.29646	0.637044	1.03289	0.079388
A_tiles_P46676:815	ATPIELICREGFFYRRDIPDVPITTGAYLEFKFKAKEEELINSSINEEDYAAK	SUM1	P46676	815	1.29245	0.629442	1.20606	0.459707
A_tiles_P46676:828	YRRDIPDVPITTGAYLEFKFKAKEEELINSSINEEDYAAKSKHEKMNAHFFKP	SUM1	P46676	828	1.05475	0.130775	1.13767	0.316477
A_tiles_P46676:841	AYLEFKFKAKEEELINSSINEEDYAAKSKHEKMNAHFFKPDIQEETELAFEIL	SUM1	P46676	841	1.34889	0.734315	2.30791	2.05202
A_tiles_P46676:854	LINSSINEEDYAAKSKHEKMNAHFFKPDIQEETELAFEILSKTTLTEKYVNSL	SUM1	P46676	854	1.89298	1.56574	2.6794	2.41822
A_tiles_P46676:867	KSKHEKMNAHFFKPDIQEETELAFEILSKTTLTEKYVNSLEYFLMEFRWENKL	SUM1	P46676	867	1.15196	0.347103	1.20629	0.460156
A_tiles_P46676:880	PDIQEETELAFEILSKTTLTEKYVNSLEYFLMEFRWENKLVGLGLKLRESKRT	SUM1	P46676	880	1.00584	0.0142785	1.11369	0.264207
A_tiles_P46676:893	LSKTTLTEKYVNSLEYFLMEFRWENKLVGLGLKLRESKRTWQRRKALFALFEF	SUM1	P46676	893	0.988062	-0.0294678	0.991956	-0.0198172
A_tiles_P46676:906	LEYFLMEFRWENKLVGLGLKLRESKRTWQRRKALFALFEFWRDQSRDKRRFHN	SUM1	P46676	906	0.971869	-0.0700095	0.969079	-0.0770641
A_tiles_P46676:91	SIEALKEGMDKVTKQCNDLKTALLSKDTSLTDSVQDLFNSLKVLSHNQSVLEN	SUM1	P46676	91	1.17356	0.392669	1.22385	0.495621
A_tiles_P46676:918	KLVGLGLKLRESKRTWQRRKALFALFEFWRDQSRDKRRFHNYTILHAVKEMEN	SUM1	P46676	918	0.913313	-0.222482	0.972688	-0.0679431
A_tiles_P46676:931	RTWQRRKALFALFEFWRDQSRDKRRFHNYTILHAVKEMENYRIFINRSVSWFY	SUM1	P46676	931	1.01685	0.0409917	0.981064	-0.046907
A_tiles_P46676:944	EFWRDQSRDKRRFHNYTILHAVKEMENYRIFINRSVSWFYNHITLLKMILYDL	SUM1	P46676	944	1.02479	0.0600714	0.987132	-0.0317786
A_tiles_P46676:957	HNYTILHAVKEMENYRIFINRSVSWFYNHITLLKMILYDLCDNVTTQWREWMF	SUM1	P46676	957	1.00772	0.0188693	0.970458	-0.0735748
A_tiles_P46676:970	NYRIFINRSVSWFYNHITLLKMILYDLCDNVTTQWREWMFPHNETLPALGQDG	SUM1	P46676	970	0.906062	-0.242038	0.970116	-0.0744394
A_tiles_P46676:983	YNHITLLKMILYDLCDNVTTQWREWMFPHNETLPALGQDGINEDNLNETIDNM	SUM1	P46676	983	1.43445	0.885193	1.38986	0.80772
A_tiles_P46676:996	LCDNVTTQWREWMFPHNETLPALGQDGINEDNLNETIDNMLIFDFLDDGSENN	SUM1	P46676	996	94.3049	11.1552	69.7812	10.4163
A_tiles_P48743:0	MVIFKERKPTENLFTRKIPAKYFIFSPSFLSVHYFEFYLPMSGDNNIEPTSRG	RFX1	P48743	0	1.0097	0.0236863	0.994359	-0.013881
A_tiles_P48743:103	KSSSIYSLLHQSSPRPETPNPILPPLIGSGPGSHKPSPTPTQPPAQPATQRQP	RFX1	P48743	103	0.844785	-0.413849	0.960356	-0.0992498
A_tiles_P48743:116	PRPETPNPILPPLIGSGPGSHKPSPTPTQPPAQPATQRQPATYSVYPASISLN	RFX1	P48743	116	0.901041	-0.255673	0.99463	-0.01321
A_tiles_P48743:128	LIGSGPGSHKPSPTPTQPPAQPATQRQPATYSVYPASISLNRSNSSAYPLSFK	RFX1	P48743	128	0.994233	-0.01419	0.999107	-0.00219278
A_tiles_P48743:13	FTRKIPAKYFIFSPSFLSVHYFEFYLPMSGDNNIEPTSRGSNDNSNGPSNGSS	RFX1	P48743	13	0.9127	-0.224129	1.0025	0.00612254
A_tiles_P48743:141	TPTQPPAQPATQRQPATYSVYPASISLNRSNSSAYPLSFKSEETLNNNPPTAA	RFX1	P48743	141	1.09119	0.214111	1.05765	0.137531
A_tiles_P48743:154	QPATYSVYPASISLNRSNSSAYPLSFKSEETLNNNPPTAAKRTNTFPSIPSST	RFX1	P48743	154	1.01666	0.0405379	1.0823	0.194054
A_tiles_P48743:167	LNRSNSSAYPLSFKSEETLNNNPPTAAKRTNTFPSIPSSTKKQKTSQEKRISS	RFX1	P48743	167	1.10224	0.238843	0.946265	-0.135517
A_tiles_P48743:180	KSEETLNNNPPTAAKRTNTFPSIPSSTKKQKTSQEKRISSISRRNTQEIIAKQ	RFX1	P48743	180	1.13917	0.319706	0.923185	-0.196103
A_tiles_P48743:193	AKRTNTFPSIPSSTKKQKTSQEKRISSISRRNTQEIIAKQIAENNKSKTIEEY	RFX1	P48743	193	1.23742	0.522685	0.923624	-0.194937
A_tiles_P48743:206	TKKQKTSQEKRISSISRRNTQEIIAKQIAENNKSKTIEEYAQIVKHAEIKVLS	RFX1	P48743	206	0.928572	-0.181826	0.946648	-0.134523
A_tiles_P48743:218	SSISRRNTQEIIAKQIAENNKSKTIEEYAQIVKHAEIKVLSMDSQNTSKAALQ	RFX1	P48743	218	0.98893	-0.0273119	0.96336	-0.0915863
A_tiles_P48743:231	KQIAENNKSKTIEEYAQIVKHAEIKVLSMDSQNTSKAALQLAEQNRERERQVF	RFX1	P48743	231	0.915926	-0.21547	0.948829	-0.128878
A_tiles_P48743:244	EYAQIVKHAEIKVLSMDSQNTSKAALQLAEQNRERERQVFALLWLMKNCKSQH	RFX1	P48743	244	0.906955	-0.23962	0.981952	-0.0446857
A_tiles_P48743:257	LSMDSQNTSKAALQLAEQNRERERQVFALLWLMKNCKSQHDSYVPRGKIFAQY	RFX1	P48743	257	0.988698	-0.0278884	0.990242	-0.0240587
A_tiles_P48743:26	PSFLSVHYFEFYLPMSGDNNIEPTSRGSNDNSNGPSNGSSVNSNRYSLNAPKY	RFX1	P48743	26	1.27319	0.592593	1.49383	0.984719
A_tiles_P48743:270	QLAEQNRERERQVFALLWLMKNCKSQHDSYVPRGKIFAQYASSCSQNNLKPLS	RFX1	P48743	270	1.14407	0.330225	0.962484	-0.0938198
A_tiles_P48743:283	FALLWLMKNCKSQHDSYVPRGKIFAQYASSCSQNNLKPLSQASLGKLIRTVFP	RFX1	P48743	283	0.915821	-0.215753	0.970206	-0.0742121
A_tiles_P48743:295	QHDSYVPRGKIFAQYASSCSQNNLKPLSQASLGKLIRTVFPDLTTRRLGMRGQ	RFX1	P48743	295	1.06016	0.143337	0.970019	-0.0746858
A_tiles_P48743:308	QYASSCSQNNLKPLSQASLGKLIRTVFPDLTTRRLGMRGQSKYHYCGLKLTVN	RFX1	P48743	308	0.924159	-0.193515	0.968779	-0.0778238
A_tiles_P48743:321	LSQASLGKLIRTVFPDLTTRRLGMRGQSKYHYCGLKLTVNESGSVSLNNNNAS	RFX1	P48743	321	0.917888	-0.210221	0.951918	-0.120903
A_tiles_P48743:334	FPDLTTRRLGMRGQSKYHYCGLKLTVNESGSVSLNNNNASLSLVHNNDPISPL	RFX1	P48743	334	1.07692	0.181822	1.02343	0.0568321
A_tiles_P48743:347	QSKYHYCGLKLTVNESGSVSLNNNNASLSLVHNNDPISPLSSPSPSSPSPQVP	RFX1	P48743	347	1.07062	0.167424	1.0615	0.146433
A_tiles_P48743:360	NESGSVSLNNNNASLSLVHNNDPISPLSSPSPSSPSPQVPNVSSPFSLNRKSL	RFX1	P48743	360	1.1007	0.235405	1.04722	0.113196
A_tiles_P48743:373	SLSLVHNNDPISPLSSPSPSSPSPQVPNVSSPFSLNRKSLSRTGSPVKQSSND	RFX1	P48743	373	0.966265	-0.0841986	0.962135	-0.0947093
A_tiles_P48743:385	PLSSPSPSSPSPQVPNVSSPFSLNRKSLSRTGSPVKQSSNDNPNEPELESQHP	RFX1	P48743	385	0.940231	-0.151214	0.96174	-0.0957174
A_tiles_P48743:39	PMSGDNNIEPTSRGSNDNSNGPSNGSSVNSNRYSLNAPKYSSQPPPASHTYLP	RFX1	P48743	39	1.06625	0.157388	1.00115	0.00282664
A_tiles_P48743:398	VPNVSSPFSLNRKSLSRTGSPVKQSSNDNPNEPELESQHPNETEANKLDSLPP	RFX1	P48743	398	0.933331	-0.169284	0.966074	-0.0846853
A_tiles_P48743:411	SLSRTGSPVKQSSNDNPNEPELESQHPNETEANKLDSLPPAANNPTGTLSSDE	RFX1	P48743	411	0.985688	-0.0353693	0.973745	-0.0652787
A_tiles_P48743:424	NDNPNEPELESQHPNETEANKLDSLPPAANNPTGTLSSDELTFTHDLIEKVFN	RFX1	P48743	424	5.2764	4.08088	2.66249	2.40268
A_tiles_P48743:437	PNETEANKLDSLPPAANNPTGTLSSDELTFTHDLIEKVFNCNDKLSDNYNTQI	RFX1	P48743	437	2.48716	2.23554	4.16552	3.50084
A_tiles_P48743:450	PAANNPTGTLSSDELTFTHDLIEKVFNCNDKLSDNYNTQILSNTEHPLLTSYK	RFX1	P48743	450	7.31256	4.8816	2.96555	2.66718
A_tiles_P48743:463	ELTFTHDLIEKVFNCNDKLSDNYNTQILSNTEHPLLTSYKLDFPKIPAGVLPT	RFX1	P48743	463	1.19795	0.443147	1.61583	1.17734
A_tiles_P48743:475	FNCNDKLSDNYNTQILSNTEHPLLTSYKLDFPKIPAGVLPTDTDSDVISSLES	RFX1	P48743	475	3.73953	3.23615	2.26555	2.00657
A_tiles_P48743:488	QILSNTEHPLLTSYKLDFPKIPAGVLPTDTDSDVISSLESLYHIHCNSVYECI	RFX1	P48743	488	2.42733	2.17581	1.3771	0.785093
A_tiles_P48743:501	YKLDFPKIPAGVLPTDTDSDVISSLESLYHIHCNSVYECIKFLKSDNISNALF	RFX1	P48743	501	1.15299	0.349293	1.36018	0.75476
A_tiles_P48743:51	RGSNDNSNGPSNGSSVNSNRYSLNAPKYSSQPPPASHTYLPPMSVNIPPIASK	RFX1	P48743	51	0.85011	-0.398434	1.02951	0.07136
A_tiles_P48743:514	PTDTDSDVISSLESLYHIHCNSVYECIKFLKSDNISNALFFSNSNSISPTMFN	RFX1	P48743	514	1.20298	0.453426	1.51656	1.02177
A_tiles_P48743:527	SLYHIHCNSVYECIKFLKSDNISNALFFSNSNSISPTMFNLFISEPLIDWVTK	RFX1	P48743	527	1.10763	0.250799	1.01619	0.0393941
A_tiles_P48743:540	IKFLKSDNISNALFFSNSNSISPTMFNLFISEPLIDWVTKCDLITYTGLIKFF	RFX1	P48743	540	1.02751	0.0665803	0.987171	-0.0316813
A_tiles_P48743:552	LFFSNSNSISPTMFNLFISEPLIDWVTKCDLITYTGLIKFFSQFIIHSNEISD	RFX1	P48743	552	0.978663	-0.0529173	0.968024	-0.0797361
A_tiles_P48743:565	FNLFISEPLIDWVTKCDLITYTGLIKFFSQFIIHSNEISDSIIQKLESMIKLL	RFX1	P48743	565	0.971753	-0.0703044	0.978714	-0.0527917
A_tiles_P48743:578	TKCDLITYTGLIKFFSQFIIHSNEISDSIIQKLESMIKLLPEQINKAVLELPK	RFX1	P48743	578	1.01306	0.0318397	0.970323	-0.073917
A_tiles_P48743:591	FFSQFIIHSNEISDSIIQKLESMIKLLPEQINKAVLELPKALVQRKLSIINNF	RFX1	P48743	591	0.946808	-0.13411	0.987626	-0.0305493
A_tiles_P48743:604	DSIIQKLESMIKLLPEQINKAVLELPKALVQRKLSIINNFTKLVKKLIKLLKF	RFX1	P48743	604	1.01847	0.044909	1.00662	0.0161927
A_tiles_P48743:617	LPEQINKAVLELPKALVQRKLSIINNFTKLVKKLIKLLKFILNFLKSFPIFKS	RFX1	P48743	617	1.04287	0.102999	1.01273	0.0310274
A_tiles_P48743:630	KALVQRKLSIINNFTKLVKKLIKLLKFILNFLKSFPIFKSGMNNDWKNIVNLD	RFX1	P48743	630	0.847491	-0.406004	0.982803	-0.0425612
A_tiles_P48743:64	SSVNSNRYSLNAPKYSSQPPPASHTYLPPMSVNIPPIASKSSSIYSLLHQSSP	RFX1	P48743	64	0.797039	-0.556596	1.03979	0.0957455
A_tiles_P48743:642	NFTKLVKKLIKLLKFILNFLKSFPIFKSGMNNDWKNIVNLDDILEMMINEDDT	RFX1	P48743	642	0.909119	-0.233773	1.32906	0.697979
A_tiles_P48743:655	KFILNFLKSFPIFKSGMNNDWKNIVNLDDILEMMINEDDTNSETNTIMQHLQG	RFX1	P48743	655	2.94838	2.65293	6.00339	4.39758
A_tiles_P48743:668	KSGMNNDWKNIVNLDDILEMMINEDDTNSETNTIMQHLQGFCQVFVTKFLNSS	RFX1	P48743	668	1.44434	0.902053	2.25502	1.99514
A_tiles_P48743:681	LDDILEMMINEDDTNSETNTIMQHLQGFCQVFVTKFLNSSMSVSNDPSVSIEC	RFX1	P48743	681	1.23158	0.511079	1.62145	1.18585
A_tiles_P48743:694	TNSETNTIMQHLQGFCQVFVTKFLNSSMSVSNDPSVSIECKSLNEMIKDFCSF	RFX1	P48743	694	0.955979	-0.110459	1.02746	0.0664775
A_tiles_P48743:707	GFCQVFVTKFLNSSMSVSNDPSVSIECKSLNEMIKDFCSFISLQSKFSCLKLI	RFX1	P48743	707	1.05229	0.125057	0.975178	-0.0616708
A_tiles_P48743:719	SSMSVSNDPSVSIECKSLNEMIKDFCSFISLQSKFSCLKLIDCSTRFRNAIIG	RFX1	P48743	719	1.13264	0.305589	0.981659	-0.0454175
A_tiles_P48743:732	ECKSLNEMIKDFCSFISLQSKFSCLKLIDCSTRFRNAIIGDISLKSNENLLSW	RFX1	P48743	732	0.975663	-0.0604523	0.970781	-0.0727594
A_tiles_P48743:745	SFISLQSKFSCLKLIDCSTRFRNAIIGDISLKSNENLLSWLFLNNVMGQLLNY	RFX1	P48743	745	1.06992	0.165811	0.969929	-0.074913
A_tiles_P48743:758	LIDCSTRFRNAIIGDISLKSNENLLSWLFLNNVMGQLLNYCFEVMKFVNGLKV	RFX1	P48743	758	0.991264	-0.0215294	0.980044	-0.049458
A_tiles_P48743:77	KYSSQPPPASHTYLPPMSVNIPPIASKSSSIYSLLHQSSPRPETPNPILPPLI	RFX1	P48743	77	0.786738	-0.588512	1.04371	0.104975
A_tiles_P48743:90	LPPMSVNIPPIASKSSSIYSLLHQSSPRPETPNPILPPLIGSGPGSHKPSPTP	RFX1	P48743	90	0.963959	-0.0900629	1.03328	0.0803181
A_tiles_P52960:0	MYFTDESSPAMNRVGKKRNRLSFVCQACRKAKTKCDQEKPRCGRCTKQNLFCI	PIP2	P52960	0	1.17014	0.385506	0.992739	-0.0178793
A_tiles_P52960:103	EELAARRTCKSLQENSFPISLYKTHPRLIMTKVMKREINPLSEKYLIFQDTFL	PIP2	P52960	103	1.05802	0.138379	0.999845	-0.000380611
A_tiles_P52960:116	ENSFPISLYKTHPRLIMTKVMKREINPLSEKYLIFQDTFLKTLIASVLLSCSR	PIP2	P52960	116	1.04983	0.11932	0.987852	-0.0299889
A_tiles_P52960:129	RLIMTKVMKREINPLSEKYLIFQDTFLKTLIASVLLSCSRNSMIPALNADISR	PIP2	P52960	129	0.999709	-0.000713738	0.963509	-0.0912086
A_tiles_P52960:13	VGKKRNRLSFVCQACRKAKTKCDQEKPRCGRCTKQNLFCIYDVARQAAPRNPN	PIP2	P52960	13	1.01506	0.0366751	0.969081	-0.07706
A_tiles_P52960:142	PLSEKYLIFQDTFLKTLIASVLLSCSRNSMIPALNADISRSRTQPCVKNNVVK	PIP2	P52960	142	1.06467	0.153758	0.957663	-0.10614
A_tiles_P52960:155	LKTLIASVLLSCSRNSMIPALNADISRSRTQPCVKNNVVKMREVLLKNSKYES	PIP2	P52960	155	0.87929	-0.315627	0.94986	-0.126213
A_tiles_P52960:168	RNSMIPALNADISRSRTQPCVKNNVVKMREVLLKNSKYESQRKSINEFTDRLL	PIP2	P52960	168	1.02016	0.0489682	0.959123	-0.102402
A_tiles_P52960:181	RSRTQPCVKNNVVKMREVLLKNSKYESQRKSINEFTDRLLQRKNPEEQIAVNK	PIP2	P52960	181	0.887704	-0.29226	0.931049	-0.17529
A_tiles_P52960:194	KMREVLLKNSKYESQRKSINEFTDRLLQRKNPEEQIAVNKVISLLYSNRESSY	PIP2	P52960	194	0.77796	-0.616042	0.993413	-0.0162159
A_tiles_P52960:207	SQRKSINEFTDRLLQRKNPEEQIAVNKVISLLYSNRESSYLEDTCPTENDYSD	PIP2	P52960	207	0.829212	-0.459501	1.09807	0.229542
A_tiles_P52960:220	LQRKNPEEQIAVNKVISLLYSNRESSYLEDTCPTENDYSDLLKGYINEIEKTL	PIP2	P52960	220	4.63545	3.76311	1.84236	1.49924
A_tiles_P52960:233	KVISLLYSNRESSYLEDTCPTENDYSDLLKGYINEIEKTLPPKAIIEQYLSHF	PIP2	P52960	233	4.69807	3.79604	1.38946	0.807022
A_tiles_P52960:245	SYLEDTCPTENDYSDLLKGYINEIEKTLPPKAIIEQYLSHFFEHIFHLIPFAS	PIP2	P52960	245	1.13473	0.31012	1.09254	0.217156
A_tiles_P52960:258	SDLLKGYINEIEKTLPPKAIIEQYLSHFFEHIFHLIPFASKEMLEESIHTTVQ	PIP2	P52960	258	0.980797	-0.047574	0.974869	-0.0624498
A_tiles_P52960:26	ACRKAKTKCDQEKPRCGRCTKQNLFCIYDVARQAAPRNPNKDATIARLKKEIR	PIP2	P52960	26	1.007	0.0171198	0.955404	-0.111933
A_tiles_P52960:271	TLPPKAIIEQYLSHFFEHIFHLIPFASKEMLEESIHTTVQYNELGEVRLSMGT	PIP2	P52960	271	1.01917	0.0465934	0.968876	-0.0775775
A_tiles_P52960:284	HFFEHIFHLIPFASKEMLEESIHTTVQYNELGEVRLSMGTTLIRNKMENLCIL	PIP2	P52960	284	1.04653	0.111587	0.985084	-0.0368732
A_tiles_P52960:297	SKEMLEESIHTTVQYNELGEVRLSMGTTLIRNKMENLCILLLILRIAYISLTF	PIP2	P52960	297	1.04877	0.116843	1.00676	0.016538
A_tiles_P52960:310	QYNELGEVRLSMGTTLIRNKMENLCILLLILRIAYISLTFIEDKIEDYSPYIT	PIP2	P52960	310	1.11925	0.276418	0.98161	-0.045542
A_tiles_P52960:323	TTLIRNKMENLCILLLILRIAYISLTFIEDKIEDYSPYITKEMLEQYPIQSEV	PIP2	P52960	323	1.08658	0.203727	0.985892	-0.0348603
A_tiles_P52960:336	LLLILRIAYISLTFIEDKIEDYSPYITKEMLEQYPIQSEVIFLAQQILASENW	PIP2	P52960	336	0.998077	-0.00472353	1.04055	0.0975313
A_tiles_P52960:349	FIEDKIEDYSPYITKEMLEQYPIQSEVIFLAQQILASENWCACANENTISCLL	PIP2	P52960	349	1.14984	0.342575	1.16228	0.368972
A_tiles_P52960:362	TKEMLEQYPIQSEVIFLAQQILASENWCACANENTISCLLYIWCAFVFSPTEG	PIP2	P52960	362	1.03127	0.075543	0.986584	-0.0331401
A_tiles_P52960:375	VIFLAQQILASENWCACANENTISCLLYIWCAFVFSPTEGDFLLEQPSDVIIN	PIP2	P52960	375	1.02039	0.0495273	0.96976	-0.0753396
A_tiles_P52960:388	WCACANENTISCLLYIWCAFVFSPTEGDFLLEQPSDVIINLVILIGTSIGLHR	PIP2	P52960	388	0.997048	-0.00725368	0.987176	-0.0316678
A_tiles_P52960:39	PRCGRCTKQNLFCIYDVARQAAPRNPNKDATIARLKKEIRYWRNKTVDLTQEK	PIP2	P52960	39	1.05137	0.12292	0.936439	-0.161129
A_tiles_P52960:400	LLYIWCAFVFSPTEGDFLLEQPSDVIINLVILIGTSIGLHRDPSDFPALNHPE	PIP2	P52960	400	0.963617	-0.0909326	0.994373	-0.0138463
A_tiles_P52960:413	EGDFLLEQPSDVIINLVILIGTSIGLHRDPSDFPALNHPEASDKRLLNLRRIQ	PIP2	P52960	413	0.883129	-0.304939	1.08434	0.198662
A_tiles_P52960:426	INLVILIGTSIGLHRDPSDFPALNHPEASDKRLLNLRRIQWLSIISMATLESS	PIP2	P52960	426	0.972763	-0.0677545	0.968761	-0.0778686
A_tiles_P52960:439	HRDPSDFPALNHPEASDKRLLNLRRIQWLSIISMATLESSLKGRLLVSPLSMI	PIP2	P52960	439	0.943004	-0.143986	0.987197	-0.0316145
A_tiles_P52960:452	EASDKRLLNLRRIQWLSIISMATLESSLKGRLLVSPLSMIDLFIDVRDPNCVE	PIP2	P52960	452	1.04777	0.114503	0.972256	-0.0690326
A_tiles_P52960:465	QWLSIISMATLESSLKGRLLVSPLSMIDLFIDVRDPNCVEIYKKRVKKDLTGS	PIP2	P52960	465	1.00762	0.018628	0.960419	-0.0990879
A_tiles_P52960:478	SLKGRLLVSPLSMIDLFIDVRDPNCVEIYKKRVKKDLTGSESDEQLLEIHEIF	PIP2	P52960	478	1.32539	0.691193	1.49298	0.983332
A_tiles_P52960:491	IDLFIDVRDPNCVEIYKKRVKKDLTGSESDEQLLEIHEIFFHRAQLALFLSDL	PIP2	P52960	491	1.01054	0.0257136	1.0514	0.122981
A_tiles_P52960:504	EIYKKRVKKDLTGSESDEQLLEIHEIFFHRAQLALFLSDLNNITISYSGSVPM	PIP2	P52960	504	1.15248	0.348207	0.991025	-0.0221196
A_tiles_P52960:517	SESDEQLLEIHEIFFHRAQLALFLSDLNNITISYSGSVPMDTLETLRVKANEL	PIP2	P52960	517	1.28404	0.613415	1.05035	0.120532
A_tiles_P52960:52	IYDVARQAAPRNPNKDATIARLKKEIRYWRNKTVDLTQEKKDFYTALKRPTEE	PIP2	P52960	52	0.961747	-0.0956987	0.956149	-0.110023
A_tiles_P52960:530	FFHRAQLALFLSDLNNITISYSGSVPMDTLETLRVKANELLKNKFQLRSVDIN	PIP2	P52960	530	1.02084	0.0506089	0.96034	-0.0992906
A_tiles_P52960:543	LNNITISYSGSVPMDTLETLRVKANELLKNKFQLRSVDINIYDEEKTFQKLTF	PIP2	P52960	543	1.03305	0.0797766	1.06519	0.154962
A_tiles_P52960:555	PMDTLETLRVKANELLKNKFQLRSVDINIYDEEKTFQKLTFNSILNSISLSGQ	PIP2	P52960	555	1.01302	0.0317448	1.05388	0.12877
A_tiles_P52960:568	ELLKNKFQLRSVDINIYDEEKTFQKLTFNSILNSISLSGQILGKLMMLRASIA	PIP2	P52960	568	1.05452	0.13026	0.983847	-0.0399562
A_tiles_P52960:581	INIYDEEKTFQKLTFNSILNSISLSGQILGKLMMLRASIALMLYFETLAMERS	PIP2	P52960	581	0.958887	-0.103007	0.994062	-0.0146125
A_tiles_P52960:594	TFNSILNSISLSGQILGKLMMLRASIALMLYFETLAMERSECLSFFYKYFFQC	PIP2	P52960	594	1.13166	0.303462	1.00282	0.00690825
A_tiles_P52960:607	QILGKLMMLRASIALMLYFETLAMERSECLSFFYKYFFQCCADTISLIRFFFL	PIP2	P52960	607	1.02234	0.054219	1.01037	0.0253016
A_tiles_P52960:620	ALMLYFETLAMERSECLSFFYKYFFQCCADTISLIRFFFLYFNGSYEKVLSSL	PIP2	P52960	620	1.22969	0.507302	0.987386	-0.0311459
A_tiles_P52960:633	SECLSFFYKYFFQCCADTISLIRFFFLYFNGSYEKVLSSLVCFITTKVIQLAV	PIP2	P52960	633	1.1426	0.327084	1.0087	0.0212426
A_tiles_P52960:646	CCADTISLIRFFFLYFNGSYEKVLSSLVCFITTKVIQLAVPTTMFTLLVIIMR	PIP2	P52960	646	1.0887	0.208516	1.02157	0.0523703
A_tiles_P52960:65	NKDATIARLKKEIRYWRNKTVDLTQEKKDFYTALKRPTEELAARRTCKSLQEN	PIP2	P52960	65	1.15677	0.357316	0.941255	-0.148541
A_tiles_P52960:659	LYFNGSYEKVLSSLVCFITTKVIQLAVPTTMFTLLVIIMRVELAKNMLLVKCN	PIP2	P52960	659	0.900572	-0.256949	1.01494	0.0363974
A_tiles_P52960:672	LVCFITTKVIQLAVPTTMFTLLVIIMRVELAKNMLLVKCNECNARGDISDLPE	PIP2	P52960	672	0.979125	-0.0517614	0.986408	-0.033578
A_tiles_P52960:685	VPTTMFTLLVIIMRVELAKNMLLVKCNECNARGDISDLPEIKEKIKSLDTIKE	PIP2	P52960	685	0.987046	-0.0319913	0.955702	-0.11117
A_tiles_P52960:698	RVELAKNMLLVKCNECNARGDISDLPEIKEKIKSLDTIKENFERLLLEVYLLA	PIP2	P52960	698	0.92531	-0.190462	0.966435	-0.0837683
A_tiles_P52960:710	CNECNARGDISDLPEIKEKIKSLDTIKENFERLLLEVYLLASQNLRFKYFYIF	PIP2	P52960	710	1.06051	0.144147	0.990052	-0.0245296
A_tiles_P52960:723	PEIKEKIKSLDTIKENFERLLLEVYLLASQNLRFKYFYIFKMLTLFDVFIQRL	PIP2	P52960	723	1.02348	0.056942	0.999819	-0.000444293
A_tiles_P52960:736	KENFERLLLEVYLLASQNLRFKYFYIFKMLTLFDVFIQRLRKGQLFSGLFVKV	PIP2	P52960	736	0.972157	-0.0692844	1.00812	0.0198372
A_tiles_P52960:749	LASQNLRFKYFYIFKMLTLFDVFIQRLRKGQLFSGLFVKVDKDLTTKKIATML	PIP2	P52960	749	1.10154	0.237281	0.992488	-0.0185014
A_tiles_P52960:762	FKMLTLFDVFIQRLRKGQLFSGLFVKVDKDLTTKKIATMLELTLGINLDKSDH	PIP2	P52960	762	0.911881	-0.22633	0.95615	-0.11002
A_tiles_P52960:775	LRKGQLFSGLFVKVDKDLTTKKIATMLELTLGINLDKSDHLIDRLKGKNLTVN	PIP2	P52960	775	0.88421	-0.301938	0.961956	-0.0951648
A_tiles_P52960:78	RYWRNKTVDLTQEKKDFYTALKRPTEELAARRTCKSLQENSFPISLYKTHPRL	PIP2	P52960	78	1.03508	0.0845901	0.960191	-0.0996701
A_tiles_P52960:788	VDKDLTTKKIATMLELTLGINLDKSDHLIDRLKGKNLTVNFTLDQLYQIIKEF	PIP2	P52960	788	0.821149	-0.483475	0.997759	-0.00550573
A_tiles_P52960:801	LELTLGINLDKSDHLIDRLKGKNLTVNFTLDQLYQIIKEFDRIKNIGVADPQN	PIP2	P52960	801	0.866269	-0.352233	1.03357	0.0810233
A_tiles_P52960:814	HLIDRLKGKNLTVNFTLDQLYQIIKEFDRIKNIGVADPQNSLNPSKPNMKDNT	PIP2	P52960	814	0.934577	-0.166011	0.980433	-0.0484858
A_tiles_P52960:827	NFTLDQLYQIIKEFDRIKNIGVADPQNSLNPSKPNMKDNTPTIELLLNSSVEN	PIP2	P52960	827	0.863572	-0.359883	1.23867	0.525151
A_tiles_P52960:840	FDRIKNIGVADPQNSLNPSKPNMKDNTPTIELLLNSSVENESVPPYSSSNDPT	PIP2	P52960	840	0.718635	-0.810661	1.17812	0.402194
A_tiles_P52960:853	NSLNPSKPNMKDNTPTIELLLNSSVENESVPPYSSSNDPTNVGNASTYSLAHN	PIP2	P52960	853	0.548214	-1.47481	1.12183	0.28206
A_tiles_P52960:865	NTPTIELLLNSSVENESVPPYSSSNDPTNVGNASTYSLAHNISNQNNEENMPP	PIP2	P52960	865	0.837375	-0.435468	1.14098	0.323605
A_tiles_P52960:878	ENESVPPYSSSNDPTNVGNASTYSLAHNISNQNNEENMPPSIGSSESNRAAPN	PIP2	P52960	878	1.20719	0.461986	1.03861	0.0929415
A_tiles_P52960:891	PTNVGNASTYSLAHNISNQNNEENMPPSIGSSESNRAAPNLNFMPINNNYNNS	PIP2	P52960	891	1.3304	0.700452	1.19223	0.431393
A_tiles_P52960:90	EKKDFYTALKRPTEELAARRTCKSLQENSFPISLYKTHPRLIMTKVMKREINP	PIP2	P52960	90	0.950215	-0.125296	0.978641	-0.052973
A_tiles_P52960:904	HNISNQNNEENMPPSIGSSESNRAAPNLNFMPINNNYNNSGSNINNNDNVKLP	PIP2	P52960	904	1.18061	0.407378	1.25395	0.555231
A_tiles_P52960:917	PSIGSSESNRAAPNLNFMPINNNYNNSGSNINNNDNVKLPSNFKNYYDPPMSS	PIP2	P52960	917	1.33268	0.704639	1.44497	0.903135
A_tiles_P52960:930	NLNFMPINNNYNNSGSNINNNDNVKLPSNFKNYYDPPMSSLDISMDVPDIFGS	PIP2	P52960	930	23.0286	7.69619	10.6653	5.80758
A_tiles_P53050:0	MQPKTFVHQLHAILLEPEVNKWIYWSPTDNTVFFLKPYDPNFSTHVLKRYFKH	MGA1	P53050	0	1.05041	0.120668	0.981105	-0.046805
A_tiles_P53050:104	ANAGILNKIQRKSTGVGKDGKRKNILSPISVSYVDASRLNVLSQQSGPVSARE	MGA1	P53050	104	1.01403	0.0341864	0.958319	-0.104458
A_tiles_P53050:117	TGVGKDGKRKNILSPISVSYVDASRLNVLSQQSGPVSAREPSNMFMGSPVHYS	MGA1	P53050	117	1.20867	0.465007	1.06725	0.15968
A_tiles_P53050:13	LLEPEVNKWIYWSPTDNTVFFLKPYDPNFSTHVLKRYFKHGNVNSFVRQLHMY	MGA1	P53050	13	1.0532	0.127184	0.991064	-0.0220227
A_tiles_P53050:130	SPISVSYVDASRLNVLSQQSGPVSAREPSNMFMGSPVHYSTSQSPPHISIPQQ	MGA1	P53050	130	1.10866	0.253096	1.18659	0.419766
A_tiles_P53050:143	NVLSQQSGPVSAREPSNMFMGSPVHYSTSQSPPHISIPQQQQSSGPYLISSLP	MGA1	P53050	143	1.21461	0.477032	1.11803	0.273738
A_tiles_P53050:156	EPSNMFMGSPVHYSTSQSPPHISIPQQQQSSGPYLISSLPPQQPTVNMMRRQS	MGA1	P53050	156	1.46829	0.942404	1.11051	0.257184
A_tiles_P53050:169	STSQSPPHISIPQQQQSSGPYLISSLPPQQPTVNMMRRQSISARMMNSYDYPN	MGA1	P53050	169	0.949829	-0.126294	1.04391	0.105438
A_tiles_P53050:182	QQQSSGPYLISSLPPQQPTVNMMRRQSISARMMNSYDYPNQFSTQDSIVQPQQ	MGA1	P53050	182	1.22507	0.498073	1.11148	0.259327
A_tiles_P53050:195	PPQQPTVNMMRRQSISARMMNSYDYPNQFSTQDSIVQPQQPQQVLSPQALSGP	MGA1	P53050	195	0.917822	-0.210398	1.0906	0.212803
A_tiles_P53050:208	SISARMMNSYDYPNQFSTQDSIVQPQQPQQVLSPQALSGPPMKKSGTLSSTDD	MGA1	P53050	208	0.907786	-0.237375	1.04506	0.10813
A_tiles_P53050:221	NQFSTQDSIVQPQQPQQVLSPQALSGPPMKKSGTLSSTDDLKTTSLPIVNYPM	MGA1	P53050	221	1.09464	0.221863	1.00333	0.00816836
A_tiles_P53050:234	QPQQVLSPQALSGPPMKKSGTLSSTDDLKTTSLPIVNYPMPYHPGAFAQQQQQ	MGA1	P53050	234	1.03243	0.0783172	1.03181	0.0768328
A_tiles_P53050:247	PPMKKSGTLSSTDDLKTTSLPIVNYPMPYHPGAFAQQQQQQQQPLPTVPPYSS	MGA1	P53050	247	0.992967	-0.0173167	1.14976	0.342406
A_tiles_P53050:26	PTDNTVFFLKPYDPNFSTHVLKRYFKHGNVNSFVRQLHMYGFHKLSHPSPDQS	MGA1	P53050	26	1.00977	0.0238462	1.02514	0.060927
A_tiles_P53050:260	DLKTTSLPIVNYPMPYHPGAFAQQQQQQQQPLPTVPPYSSYSTPFPSMMNSLS	MGA1	P53050	260	1.05587	0.133382	1.4246	0.8683
A_tiles_P53050:273	MPYHPGAFAQQQQQQQQPLPTVPPYSSYSTPFPSMMNSLSNSASNSPALGVCN	MGA1	P53050	273	1.19043	0.4277	1.45035	0.912251
A_tiles_P53050:286	QQQQPLPTVPPYSSYSTPFPSMMNSLSNSASNSPALGVCNNNVTLPKKSNISE	MGA1	P53050	286	1.07976	0.188287	1.15258	0.34841
A_tiles_P53050:299	SYSTPFPSMMNSLSNSASNSPALGVCNNNVTLPKKSNISERQALDNHIQTLKN	MGA1	P53050	299	0.940776	-0.14979	1.07046	0.167059
A_tiles_P53050:312	SNSASNSPALGVCNNNVTLPKKSNISERQALDNHIQTLKNSLSTITDLIEKHI	MGA1	P53050	312	1.06759	0.16048	1.01689	0.0411057
A_tiles_P53050:325	NNNVTLPKKSNISERQALDNHIQTLKNSLSTITDLIEKHINSASQDENKTLTN	MGA1	P53050	325	0.96949	-0.0760246	0.962116	-0.0947584
A_tiles_P53050:338	ERQALDNHIQTLKNSLSTITDLIEKHINSASQDENKTLTNDAMNKDLRTSLSL	MGA1	P53050	338	1.02472	0.0599171	0.986783	-0.0326452
A_tiles_P53050:351	NSLSTITDLIEKHINSASQDENKTLTNDAMNKDLRTSLSLLQNSKEEIIQLES	MGA1	P53050	351	1.00497	0.012158	1.07165	0.169775
A_tiles_P53050:364	INSASQDENKTLTNDAMNKDLRTSLSLLQNSKEEIIQLESKWMSMQSVKTTAL	MGA1	P53050	364	1.02296	0.0557076	1.08827	0.207548
A_tiles_P53050:377	NDAMNKDLRTSLSLLQNSKEEIIQLESKWMSMQSVKTTALPLQETTNTSSTLT	MGA1	P53050	377	0.950034	-0.125763	1.14629	0.334984
A_tiles_P53050:39	PNFSTHVLKRYFKHGNVNSFVRQLHMYGFHKLSHPSPDQSSANNGNVKELVEW	MGA1	P53050	39	0.958183	-0.104809	1.01624	0.0395151
A_tiles_P53050:390	LLQNSKEEIIQLESKWMSMQSVKTTALPLQETTNTSSTLTSLTSSIIPKSIPI	MGA1	P53050	390	0.96506	-0.0872615	1.11841	0.274571
A_tiles_P53050:403	SKWMSMQSVKTTALPLQETTNTSSTLTSLTSSIIPKSIPIITKGEVATKPASY	MGA1	P53050	403	0.913236	-0.222689	0.963373	-0.0915546
A_tiles_P53050:52	HGNVNSFVRQLHMYGFHKLSHPSPDQSSANNGNVKELVEWKFTHPSGFFFKEA	MGA1	P53050	52	1.07776	0.183742	1.54538	1.06796
A_tiles_P53050:65	YGFHKLSHPSPDQSSANNGNVKELVEWKFTHPSGFFFKEANAGILNKIQRKST	MGA1	P53050	65	1.02271	0.0550929	1.4026	0.830103
A_tiles_P53050:78	SSANNGNVKELVEWKFTHPSGFFFKEANAGILNKIQRKSTGVGKDGKRKNILS	MGA1	P53050	78	1.05907	0.140813	1.13429	0.309174
A_tiles_P53050:91	WKFTHPSGFFFKEANAGILNKIQRKSTGVGKDGKRKNILSPISVSYVDASRLN	MGA1	P53050	91	1.00057	0.00140451	0.997058	-0.00722864
A_tiles_P53971:0	MTEHESLGLEQNQDGGDTYRHHNLSDGCISSVEDANEQPSSYEEESDDDMQYY	FAP1	P53971	0	2.73495	2.46857	1.29554	0.635297
A_tiles_P53971:103	TEKTVDRIWKCPNCYYVSKRVPVKNRPTCWCGKVVNPDPNPLDPNSCGQTCNA	FAP1	P53971	103	1.09216	0.216296	1.04565	0.109521
A_tiles_P53971:116	CYYVSKRVPVKNRPTCWCGKVVNPDPNPLDPNSCGQTCNASTCMHGCSKICHL	FAP1	P53971	116	1.01111	0.0270969	1.00425	0.0103943
A_tiles_P53971:128	RPTCWCGKVVNPDPNPLDPNSCGQTCNASTCMHGCSKICHLGPHPECTRMVEI	FAP1	P53971	128	1.29545	0.635126	1.10626	0.247773
A_tiles_P53971:13	DGGDTYRHHNLSDGCISSVEDANEQPSSYEEESDDDMQYYERAIQEISSGDSY	FAP1	P53971	13	1.94343	1.63028	1.71353	1.32139
A_tiles_P53971:141	PNPLDPNSCGQTCNASTCMHGCSKICHLGPHPECTRMVEIMCHCGKHSKSIFC	FAP1	P53971	141	1.32596	0.692236	1.01906	0.046325
A_tiles_P53971:154	NASTCMHGCSKICHLGPHPECTRMVEIMCHCGKHSKSIFCYQSKVMKKNFNCQ	FAP1	P53971	154	1.09545	0.223691	0.981471	-0.0458891
A_tiles_P53971:167	HLGPHPECTRMVEIMCHCGKHSKSIFCYQSKVMKKNFNCQEVCGLPLSCSIHT	FAP1	P53971	167	1.09815	0.229722	0.979146	-0.0517069
A_tiles_P53971:180	IMCHCGKHSKSIFCYQSKVMKKNFNCQEVCGLPLSCSIHTCKKKCHPGLCGPC	FAP1	P53971	180	1.06537	0.155375	0.978562	-0.0531726
A_tiles_P53971:193	CYQSKVMKKNFNCQEVCGLPLSCSIHTCKKKCHPGLCGPCPEMIISKDSPKKQ	FAP1	P53971	193	1.05473	0.130739	0.967318	-0.0815263
A_tiles_P53971:206	QEVCGLPLSCSIHTCKKKCHPGLCGPCPEMIISKDSPKKQIKCYCGNHTRANI	FAP1	P53971	206	0.968867	-0.0776014	0.996215	-0.00930409
A_tiles_P53971:218	HTCKKKCHPGLCGPCPEMIISKDSPKKQIKCYCGNHTRANIKCSETKFPKSGK	FAP1	P53971	218	0.998186	-0.00445438	0.96747	-0.0811411
A_tiles_P53971:231	PCPEMIISKDSPKKQIKCYCGNHTRANIKCSETKFPKSGKSSKDENGNRWIGV	FAP1	P53971	231	1.01472	0.0358619	0.970431	-0.0736433
A_tiles_P53971:244	KQIKCYCGNHTRANIKCSETKFPKSGKSSKDENGNRWIGVFACADNRVVDYSC	FAP1	P53971	244	1.04696	0.112604	1.02234	0.054212
A_tiles_P53971:257	NIKCSETKFPKSGKSSKDENGNRWIGVFACADNRVVDYSCRKHSFIESCISPP	FAP1	P53971	257	0.967648	-0.0806891	1.05234	0.125177
A_tiles_P53971:26	GCISSVEDANEQPSSYEEESDDDMQYYERAIQEISSGDSYVCMICTVEMDYTC	FAP1	P53971	26	2.25996	2.0005	2.30155	2.04525
A_tiles_P53971:270	KSSKDENGNRWIGVFACADNRVVDYSCRKHSFIESCISPPTINGEKACPFLPS	FAP1	P53971	270	1.1488	0.340358	1.10494	0.244842
A_tiles_P53971:283	VFACADNRVVDYSCRKHSFIESCISPPTINGEKACPFLPSSLKTCPCGRTALE	FAP1	P53971	283	1.25561	0.55848	1.03979	0.095725
A_tiles_P53971:295	SCRKHSFIESCISPPTINGEKACPFLPSSLKTCPCGRTALEELTKPRKHCDDP	FAP1	P53971	295	1.05852	0.139531	1.00851	0.0207827
A_tiles_P53971:308	PPTINGEKACPFLPSSLKTCPCGRTALEELTKPRKHCDDPIPTCDSRCGKPLK	FAP1	P53971	308	0.9948	-0.0127912	1.0003	0.000740075
A_tiles_P53971:321	PSSLKTCPCGRTALEELTKPRKHCDDPIPTCDSRCGKPLKCGKHSCPFTCHDK	FAP1	P53971	321	1.02746	0.0664584	1.03389	0.0817629
A_tiles_P53971:334	LEELTKPRKHCDDPIPTCDSRCGKPLKCGKHSCPFTCHDKACMEPCLQIDSVK	FAP1	P53971	334	0.991757	-0.0203082	1.13886	0.319039
A_tiles_P53971:347	PIPTCDSRCGKPLKCGKHSCPFTCHDKACMEPCLQIDSVKCACEQSTFSVPCG	FAP1	P53971	347	1.36302	0.759884	1.08468	0.199444
A_tiles_P53971:360	KCGKHSCPFTCHDKACMEPCLQIDSVKCACEQSTFSVPCGFQGRPRCNIKCES	FAP1	P53971	360	1.19859	0.444446	1.01518	0.0369588
A_tiles_P53971:373	KACMEPCLQIDSVKCACEQSTFSVPCGFQGRPRCNIKCESLMSCRRHRCTDRC	FAP1	P53971	373	1.16044	0.365079	0.989144	-0.0267821
A_tiles_P53971:385	VKCACEQSTFSVPCGFQGRPRCNIKCESLMSCRRHRCTDRCCSGRPSAIRRKK	FAP1	P53971	385	1.07953	0.187763	0.980084	-0.0493577
A_tiles_P53971:39	SSYEEESDDDMQYYERAIQEISSGDSYVCMICTVEMDYTCQMFACKRCYRVFD	FAP1	P53971	39	1.77258	1.40451	1.18995	0.426699
A_tiles_P53971:398	CGFQGRPRCNIKCESLMSCRRHRCTDRCCSGRPSAIRRKKNLFRTQDLLDESL	FAP1	P53971	398	1.09367	0.219679	0.977191	-0.0566116
A_tiles_P53971:411	ESLMSCRRHRCTDRCCSGRPSAIRRKKNLFRTQDLLDESLVEAKHICLKPCNL	FAP1	P53971	411	1.16763	0.380249	0.987187	-0.0316409
A_tiles_P53971:424	RCCSGRPSAIRRKKNLFRTQDLLDESLVEAKHICLKPCNLTLSCGIHKCQRKC	FAP1	P53971	424	1.07752	0.183182	0.994826	-0.0127267
A_tiles_P53971:437	KNLFRTQDLLDESLVEAKHICLKPCNLTLSCGIHKCQRKCHPGKCPPCLESDS	FAP1	P53971	437	1.03124	0.0754646	1.01761	0.0428313
A_tiles_P53971:450	LVEAKHICLKPCNLTLSCGIHKCQRKCHPGKCPPCLESDSNDLVCPCGNTVVP	FAP1	P53971	450	1.12848	0.296574	0.993185	-0.0167773
A_tiles_P53971:462	NLTLSCGIHKCQRKCHPGKCPPCLESDSNDLVCPCGNTVVPAPVRCGTKLPTC	FAP1	P53971	462	1.06655	0.158091	1.00751	0.0183501
A_tiles_P53971:475	KCHPGKCPPCLESDSNDLVCPCGNTVVPAPVRCGTKLPTCNHPCIKVVRGEST	FAP1	P53971	475	1.09956	0.232865	1.05662	0.135127
A_tiles_P53971:488	DSNDLVCPCGNTVVPAPVRCGTKLPTCNHPCIKVVRGESTCGHKPMPHTCHSL	FAP1	P53971	488	0.984441	-0.0384762	1.0422	0.101412
A_tiles_P53971:501	VPAPVRCGTKLPTCNHPCIKVVRGESTCGHKPMPHTCHSLDVSCPPCTETVFK	FAP1	P53971	501	1.09127	0.21429	1.04567	0.109571
A_tiles_P53971:51	YYERAIQEISSGDSYVCMICTVEMDYTCQMFACKRCYRVFDYGCIREWALKST	FAP1	P53971	51	1.04656	0.111668	0.980937	-0.047225
A_tiles_P53971:514	CNHPCIKVVRGESTCGHKPMPHTCHSLDVSCPPCTETVFKPCKCGKKTKVRTV	FAP1	P53971	514	1.13467	0.30998	0.991304	-0.0214287
A_tiles_P53971:527	TCGHKPMPHTCHSLDVSCPPCTETVFKPCKCGKKTKVRTVCFQTDVSCGIKCG	FAP1	P53971	527	1.31925	0.679784	1.04213	0.101256
A_tiles_P53971:539	SLDVSCPPCTETVFKPCKCGKKTKVRTVCFQTDVSCGIKCGIPLSYCYHTCQK	FAP1	P53971	539	1.12711	0.293577	1.0156	0.0379906
A_tiles_P53971:552	FKPCKCGKKTKVRTVCFQTDVSCGIKCGIPLSYCYHTCQKTCHLPGNCQKVCK	FAP1	P53971	552	1.06152	0.146493	0.998405	-0.00391753
A_tiles_P53971:565	TVCFQTDVSCGIKCGIPLSYCYHTCQKTCHLPGNCQKVCKQTCGQKRLNCNHE	FAP1	P53971	565	1.1573	0.358441	0.993173	-0.0168071
A_tiles_P53971:578	CGIPLSYCYHTCQKTCHLPGNCQKVCKQTCGQKRLNCNHECPKPCHGKTECPD	FAP1	P53971	578	1.03856	0.092829	1.0107	0.0261108
A_tiles_P53971:591	KTCHLPGNCQKVCKQTCGQKRLNCNHECPKPCHGKTECPDLPCATLVKIYCKC	FAP1	P53971	591	1.10917	0.254209	0.991646	-0.0205837
A_tiles_P53971:604	KQTCGQKRLNCNHECPKPCHGKTECPDLPCATLVKIYCKCGRIKKSVTCGAKS	FAP1	P53971	604	1.11687	0.271202	0.983882	-0.0398679
A_tiles_P53971:617	ECPKPCHGKTECPDLPCATLVKIYCKCGRIKKSVTCGAKSDRVSVTESSVLDC	FAP1	P53971	617	1.04138	0.0994916	0.991617	-0.0206553
A_tiles_P53971:629	PDLPCATLVKIYCKCGRIKKSVTCGAKSDRVSVTESSVLDCNEECEALKRLKE	FAP1	P53971	629	1.00677	0.0165513	0.981859	-0.0449182
A_tiles_P53971:64	SYVCMICTVEMDYTCQMFACKRCYRVFDYGCIREWALKSTEKTVDRIWKCPNC	FAP1	P53971	64	1.08896	0.209092	0.968345	-0.0789233
A_tiles_P53971:642	KCGRIKKSVTCGAKSDRVSVTESSVLDCNEECEALKRLKELKEAFGIKEETNN	FAP1	P53971	642	1.36941	0.771343	1.04904	0.117471
A_tiles_P53971:655	KSDRVSVTESSVLDCNEECEALKRLKELKEAFGIKEETNNFTSNELDALKKLV	FAP1	P53971	655	1.3512	0.738497	1.29867	0.641219
A_tiles_P53971:668	DCNEECEALKRLKELKEAFGIKEETNNFTSNELDALKKLVSVATTFEELQLPF	FAP1	P53971	668	1.55955	1.09036	1.20202	0.45146
A_tiles_P53971:681	ELKEAFGIKEETNNFTSNELDALKKLVSVATTFEELQLPFTEAALSVYSKQER	FAP1	P53971	681	1.40847	0.840349	1.6753	1.26602
A_tiles_P53971:694	NFTSNELDALKKLVSVATTFEELQLPFTEAALSVYSKQERWCSQIEAILNKLM	FAP1	P53971	694	1.06963	0.165146	1.00429	0.0104913
A_tiles_P53971:706	LVSVATTFEELQLPFTEAALSVYSKQERWCSQIEAILNKLMDDKTRSSLHFKP	FAP1	P53971	706	0.945236	-0.138185	1.10195	0.238191
A_tiles_P53971:719	PFTEAALSVYSKQERWCSQIEAILNKLMDDKTRSSLHFKPMRPPQRHFIRELA	FAP1	P53971	719	0.954212	-0.114997	0.98052	-0.0482682
A_tiles_P53971:732	ERWCSQIEAILNKLMDDKTRSSLHFKPMRPPQRHFIRELAKAYGLYSESQDRE	FAP1	P53971	732	0.942796	-0.144528	0.96891	-0.0774924
A_tiles_P53971:745	LMDDKTRSSLHFKPMRPPQRHFIRELAKAYGLYSESQDREPMRSVFIKKEDNG	FAP1	P53971	745	0.932674	-0.171013	0.96249	-0.0938045
A_tiles_P53971:758	PMRPPQRHFIRELAKAYGLYSESQDREPMRSVFIKKEDNGASNKPVLSLAEAY	FAP1	P53971	758	0.945739	-0.136882	0.976591	-0.0581191
A_tiles_P53971:77	TCQMFACKRCYRVFDYGCIREWALKSTEKTVDRIWKCPNCYYVSKRVPVKNRP	FAP1	P53971	77	1.11556	0.268311	0.975005	-0.0621069
A_tiles_P53971:771	AKAYGLYSESQDREPMRSVFIKKEDNGASNKPVLSLAEAYPLYESFKQLQKER	FAP1	P53971	771	0.936334	-0.161403	1.04047	0.0973335
A_tiles_P53971:784	EPMRSVFIKKEDNGASNKPVLSLAEAYPLYESFKQLQKERKAQEFQARTTAKL	FAP1	P53971	784	1.03075	0.0743193	0.967411	-0.0812899
A_tiles_P53971:796	NGASNKPVLSLAEAYPLYESFKQLQKERKAQEFQARTTAKLINFEVQDTEPKV	FAP1	P53971	796	0.964291	-0.0892163	0.976627	-0.0580268
A_tiles_P53971:809	AYPLYESFKQLQKERKAQEFQARTTAKLINFEVQDTEPKVEVAKKNGFLVQNL	FAP1	P53971	809	0.952416	-0.119619	0.966521	-0.0835503
A_tiles_P53971:822	ERKAQEFQARTTAKLINFEVQDTEPKVEVAKKNGFLVQNLVAGNTAEDLRRFF	FAP1	P53971	822	0.830951	-0.454363	1.05034	0.120514
A_tiles_P53971:835	KLINFEVQDTEPKVEVAKKNGFLVQNLVAGNTAEDLRRFFEPHLKHTLVVNPQ	FAP1	P53971	835	0.997511	-0.00611349	1.04078	0.0980581
A_tiles_P53971:848	VEVAKKNGFLVQNLVAGNTAEDLRRFFEPHLKHTLVVNPQYLILDDGKTALVY	FAP1	P53971	848	1.26176	0.570463	1.00996	0.0243263
A_tiles_P53971:861	LVAGNTAEDLRRFFEPHLKHTLVVNPQYLILDDGKTALVYPENYETASVNTER	FAP1	P53971	861	2.74157	2.4745	1.19603	0.43921
A_tiles_P53971:873	FFEPHLKHTLVVNPQYLILDDGKTALVYPENYETASVNTERDMELLVGHFDFM	FAP1	P53971	873	2.84712	2.56719	3.65407	3.17943
A_tiles_P53971:886	PQYLILDDGKTALVYPENYETASVNTERDMELLVGHFDFMAKEAFLADSISLC	FAP1	P53971	886	1.26686	0.58036	1.75675	1.38251
A_tiles_P53971:899	VYPENYETASVNTERDMELLVGHFDFMAKEAFLADSISLCSTEEELERRLDTP	FAP1	P53971	899	15.5718	6.73616	7.7546	5.0256
A_tiles_P53971:90	FDYGCIREWALKSTEKTVDRIWKCPNCYYVSKRVPVKNRPTCWCGKVVNPDPN	FAP1	P53971	90	1.39732	0.82086	0.991755	-0.0203144
A_tiles_P53971:912	ERDMELLVGHFDFMAKEAFLADSISLCSTEEELERRLDTPVIQEDSPVMDNNT	FAP1	P53971	912	19.0023	7.22467	13.1972	6.33021
A_tiles_Q00453:0	MRGKQPKRNKDNASVKRNYRCVGYPDCNMSFNRTEHLARHIRKHTGEKPFQCN	RGM1	Q00453	0	0.950504	-0.124549	0.97167	-0.0705121
A_tiles_Q00453:109	VVQPAPVPYNLPISTPASPQDTISLYAPPYFPHPMPSAPIPLPHQPPPLPIYS	RGM1	Q00453	109	1.17481	0.395286	1.16954	0.384261
A_tiles_Q00453:12	ASVKRNYRCVGYPDCNMSFNRTEHLARHIRKHTGEKPFQCNICLKFFSRIDNL	RGM1	Q00453	12	0.912143	-0.225625	1.00681	0.0166472
A_tiles_Q00453:122	STPASPQDTISLYAPPYFPHPMPSAPIPLPHQPPPLPIYSYMQPLFLNHTPIQ	RGM1	Q00453	122	1.28259	0.610647	1.19979	0.446917
A_tiles_Q00453:134	YAPPYFPHPMPSAPIPLPHQPPPLPIYSYMQPLFLNHTPIQNHNIVELPPDSS	RGM1	Q00453	134	1.0064	0.0156456	1.27348	0.59315
A_tiles_Q00453:158	PIYSYMQPLFLNHTPIQNHNIVELPPDSSDTPASPSKVQSFDQAKDASPNAKK	RGM1	Q00453	158	1.02812	0.0680406	1.10887	0.253548
A_tiles_Q00453:24	PDCNMSFNRTEHLARHIRKHTGEKPFQCNICLKFFSRIDNLRQHQSSVHSDVD	RGM1	Q00453	24	0.932091	-0.172548	1.01108	0.0270297
A_tiles_Q00453:49	FQCNICLKFFSRIDNLRQHQSSVHSDVDLMSLRRLQQSANSTANDPNATRMFP	RGM1	Q00453	49	1.05511	0.131619	0.95579	-0.110944
A_tiles_Q00453:61	IDNLRQHQSSVHSDVDLMSLRRLQQSANSTANDPNATRMFPQLRPYGIVVQPA	RGM1	Q00453	61	1.06298	0.149848	1.0008	0.00197155
A_tiles_Q00453:73	SDVDLMSLRRLQQSANSTANDPNATRMFPQLRPYGIVVQPAPVPYNLPISTPA	RGM1	Q00453	73	1.04821	0.115518	1.04874	0.116767
A_tiles_Q00453:85	QSANSTANDPNATRMFPQLRPYGIVVQPAPVPYNLPISTPASPQDTISLYAPP	RGM1	Q00453	85	1.14918	0.341158	1.13154	0.303218
A_tiles_Q00453:97	TRMFPQLRPYGIVVQPAPVPYNLPISTPASPQDTISLYAPPYFPHPMPSAPIP	RGM1	Q00453	97	0.926498	-0.187312	1.05047	0.120818
A_tiles_Q03081:0	MKLAQDMNVDEIFLKQAAEAIAVISSSPTHTDPIIRELLHRIRQSSPLSAVIP	MET31	Q03081	0	1.63419	1.20506	1.08633	0.203169
A_tiles_Q03081:112	HEKVHSLVLPHICSNCGKGFARKDALKRHSNTLTCQRNRKKLSEGSDVDVDEL	MET31	Q03081	112	0.944931	-0.138978	0.946555	-0.134766
A_tiles_Q03081:12	FLKQAAEAIAVISSSPTHTDPIIRELLHRIRQSSPLSAVIPAPENVLKAGEPE	MET31	Q03081	12	1.23929	0.526377	0.982992	-0.0420902
A_tiles_Q03081:124	CSNCGKGFARKDALKRHSNTLTCQRNRKKLSEGSDVDVDELIKDAIKNGTGLL	MET31	Q03081	124	1.34966	0.735707	1.01769	0.0430141
A_tiles_Q03081:25	SSPTHTDPIIRELLHRIRQSSPLSAVIPAPENVLKAGEPENMARGLIRIPETQ	MET31	Q03081	25	0.886908	-0.294463	0.96946	-0.0761013
A_tiles_Q03081:37	LLHRIRQSSPLSAVIPAPENVLKAGEPENMARGLIRIPETQTKRTGGNNHSKE	MET31	Q03081	37	0.780446	-0.608212	0.918277	-0.209183
A_tiles_Q03081:50	VIPAPENVLKAGEPENMARGLIRIPETQTKRTGGNNHSKEGAQLYSCAKCQLK	MET31	Q03081	50	0.965893	-0.0851448	0.955331	-0.112122
A_tiles_Q03081:62	EPENMARGLIRIPETQTKRTGGNNHSKEGAQLYSCAKCQLKFSRSSDLRRHEK	MET31	Q03081	62	1.04739	0.113598	0.939427	-0.153312
A_tiles_Q03081:74	PETQTKRTGGNNHSKEGAQLYSCAKCQLKFSRSSDLRRHEKVHSLVLPHICSN	MET31	Q03081	74	0.828778	-0.460786	0.962779	-0.093066
A_tiles_Q03081:87	SKEGAQLYSCAKCQLKFSRSSDLRRHEKVHSLVLPHICSNCGKGFARKDALKR	MET31	Q03081	87	1.0194	0.0471331	0.952419	-0.119611
A_tiles_Q03081:99	CQLKFSRSSDLRRHEKVHSLVLPHICSNCGKGFARKDALKRHSNTLTCQRNRK	MET31	Q03081	99	0.875895	-0.32512	0.937711	-0.157797
A_tiles_Q05958:0	MTSDDGNAGQEREKDAELIEVGGKKVSKTSTGKRKFHNKSKTGCDNCKRRRVK	ECM22	Q05958	0	1.12438	0.287627	0.938341	-0.156149
A_tiles_Q05958:103	DNAIMLQQQQQQLHHQQEQQFRQQQQVQLQQQLLPHVGTDEQSNSPNSVPPSV	ECM22	Q05958	103	1.33888	0.716031	1.12785	0.295191
A_tiles_Q05958:116	HHQQEQQFRQQQQVQLQQQLLPHVGTDEQSNSPNSVPPSVSNNMENLLLPHLL	ECM22	Q05958	116	1.10372	0.242128	1.11605	0.269401
A_tiles_Q05958:129	VQLQQQLLPHVGTDEQSNSPNSVPPSVSNNMENLLLPHLLASLVNNTSNSTNS	ECM22	Q05958	129	0.928091	-0.183099	1.02539	0.0615073
A_tiles_Q05958:142	DEQSNSPNSVPPSVSNNMENLLLPHLLASLVNNTSNSTNSSANGAEAHNNITQ	ECM22	Q05958	142	0.862312	-0.363466	0.992452	-0.0185885
A_tiles_Q05958:155	VSNNMENLLLPHLLASLVNNTSNSTNSSANGAEAHNNITQTAPSSMINNNHPN	ECM22	Q05958	155	0.85138	-0.394771	1.01203	0.0293294
A_tiles_Q05958:168	LASLVNNTSNSTNSSANGAEAHNNITQTAPSSMINNNHPNMALPGNSPLSIPI	ECM22	Q05958	168	0.891113	-0.282858	1.03608	0.0869622
A_tiles_Q05958:181	SSANGAEAHNNITQTAPSSMINNNHPNMALPGNSPLSIPITPSFQSTAMNLSS	ECM22	Q05958	181	1.18542	0.417354	1.19723	0.441672
A_tiles_Q05958:193	TQTAPSSMINNNHPNMALPGNSPLSIPITPSFQSTAMNLSSSLNGLLSPGRLN	ECM22	Q05958	193	1.64544	1.22189	1.15624	0.356196
A_tiles_Q05958:206	PNMALPGNSPLSIPITPSFQSTAMNLSSSLNGLLSPGRLNSVTNGLQQPQLQQ	ECM22	Q05958	206	1.19715	0.441512	1.0386	0.092927
A_tiles_Q05958:219	PITPSFQSTAMNLSSSLNGLLSPGRLNSVTNGLQQPQLQQQNQQIPQQQGTQS	ECM22	Q05958	219	0.941653	-0.147505	0.989868	-0.0249861
A_tiles_Q05958:232	SSSLNGLLSPGRLNSVTNGLQQPQLQQQNQQIPQQQGTQSPFSNIPFDQLAQL	ECM22	Q05958	232	1.39294	0.81315	1.25084	0.549137
A_tiles_Q05958:245	NSVTNGLQQPQLQQQNQQIPQQQGTQSPFSNIPFDQLAQLNKMGLNFNMKSFN	ECM22	Q05958	245	1.72499	1.33774	1.68221	1.27612
A_tiles_Q05958:258	QQNQQIPQQQGTQSPFSNIPFDQLAQLNKMGLNFNMKSFNTLFPYGAANGMAS	ECM22	Q05958	258	1.7501	1.3732	1.612	1.17152
A_tiles_Q05958:26	SKTSTGKRKFHNKSKTGCDNCKRRRVKCDEGKPFCKKCTNMKLDCVYSPIQPR	ECM22	Q05958	26	0.90697	-0.239582	0.992888	-0.0175123
A_tiles_Q05958:271	SPFSNIPFDQLAQLNKMGLNFNMKSFNTLFPYGAANGMASEFQELFGLGKFAT	ECM22	Q05958	271	1.09129	0.214349	1.24511	0.53789
A_tiles_Q05958:284	LNKMGLNFNMKSFNTLFPYGAANGMASEFQELFGLGKFATSNNRAIKVSTAEE	ECM22	Q05958	284	1.51725	1.02289	1.12586	0.290862
A_tiles_Q05958:297	NTLFPYGAANGMASEFQELFGLGKFATSNNRAIKVSTAEEALANMQQEQEDKN	ECM22	Q05958	297	4.07309	3.44579	2.35987	2.10664
A_tiles_Q05958:310	SEFQELFGLGKFATSNNRAIKVSTAEEALANMQQEQEDKNKQFTKNPLDNTKT	ECM22	Q05958	310	1.18743	0.42151	1.46625	0.939006
A_tiles_Q05958:322	ATSNNRAIKVSTAEEALANMQQEQEDKNKQFTKNPLDNTKTDAVNSGNNPLNG	ECM22	Q05958	322	0.925411	-0.190195	0.935165	-0.164467
A_tiles_Q05958:335	EEALANMQQEQEDKNKQFTKNPLDNTKTDAVNSGNNPLNGNENKVTASDILSH	ECM22	Q05958	335	0.944993	-0.138817	0.949738	-0.126528
A_tiles_Q05958:348	KNKQFTKNPLDNTKTDAVNSGNNPLNGNENKVTASDILSHNKNLIIDNTGLTI	ECM22	Q05958	348	1.02981	0.0720807	0.993915	-0.0149756
A_tiles_Q05958:361	KTDAVNSGNNPLNGNENKVTASDILSHNKNLIIDNTGLTISPPHTLSKPSIDQ	ECM22	Q05958	361	0.957687	-0.106078	1.05426	0.129634
A_tiles_Q05958:374	GNENKVTASDILSHNKNLIIDNTGLTISPPHTLSKPSIDQNIASPSTGVSNVT	ECM22	Q05958	374	0.973294	-0.0664154	1.07408	0.17535
A_tiles_Q05958:387	HNKNLIIDNTGLTISPPHTLSKPSIDQNIASPSTGVSNVTSTKSLLSIPDNRT	ECM22	Q05958	387	1.14298	0.327882	0.983003	-0.0420626
A_tiles_Q05958:39	SKTGCDNCKRRRVKCDEGKPFCKKCTNMKLDCVYSPIQPRRRKDSSSSKFASA	ECM22	Q05958	39	0.98419	-0.0390996	0.980056	-0.0494288
A_tiles_Q05958:400	ISPPHTLSKPSIDQNIASPSTGVSNVTSTKSLLSIPDNRTALGNSPTLKTSPM	ECM22	Q05958	400	0.933625	-0.168511	0.955641	-0.111325
A_tiles_Q05958:413	QNIASPSTGVSNVTSTKSLLSIPDNRTALGNSPTLKTSPMGDLLSNSEALSPR	ECM22	Q05958	413	0.931484	-0.174145	0.990511	-0.023394
A_tiles_Q05958:426	TSTKSLLSIPDNRTALGNSPTLKTSPMGDLLSNSEALSPRSSNSHTQQQSSPH	ECM22	Q05958	426	0.917685	-0.210764	0.952226	-0.120109
A_tiles_Q05958:439	TALGNSPTLKTSPMGDLLSNSEALSPRSSNSHTQQQSSPHSNASSASRLVPEL	ECM22	Q05958	439	0.972232	-0.0690951	0.989233	-0.0265614
A_tiles_Q05958:451	PMGDLLSNSEALSPRSSNSHTQQQSSPHSNASSASRLVPELVGLSRKSNLNLI	ECM22	Q05958	451	0.938834	-0.154862	1.00002	4.69208e-05
A_tiles_Q05958:464	PRSSNSHTQQQSSPHSNASSASRLVPELVGLSRKSNLNLIDLKLFHHYCTDVW	ECM22	Q05958	464	1.35513	0.745635	1.04326	0.103911
A_tiles_Q05958:477	PHSNASSASRLVPELVGLSRKSNLNLIDLKLFHHYCTDVWHTITEAGISGPEV	ECM22	Q05958	477	1.30583	0.654704	1.05721	0.136509
A_tiles_Q05958:490	ELVGLSRKSNLNLIDLKLFHHYCTDVWHTITEAGISGPEVWSTYIPDLAFHFP	ECM22	Q05958	490	0.960701	-0.0983696	1.04972	0.119058
A_tiles_Q05958:503	IDLKLFHHYCTDVWHTITEAGISGPEVWSTYIPDLAFHFPFLMHTILAFSATH	ECM22	Q05958	503	0.983512	-0.0407915	0.980291	-0.0488394
A_tiles_Q05958:516	WHTITEAGISGPEVWSTYIPDLAFHFPFLMHTILAFSATHLSRTEAGLDNYVS	ECM22	Q05958	516	0.957507	-0.106539	0.970633	-0.073134
A_tiles_Q05958:52	KCDEGKPFCKKCTNMKLDCVYSPIQPRRRKDSSSSKFASAVHDRVGKKNLSDN	ECM22	Q05958	52	1.07336	0.173694	0.968659	-0.0781271
A_tiles_Q05958:529	VWSTYIPDLAFHFPFLMHTILAFSATHLSRTEAGLDNYVSSHRLEALRLLREA	ECM22	Q05958	529	0.972486	-0.0684527	0.98469	-0.0378549
A_tiles_Q05958:542	PFLMHTILAFSATHLSRTEAGLDNYVSSHRLEALRLLREAVLEISDDNTDALV	ECM22	Q05958	542	1.07232	0.171315	0.955791	-0.11094
A_tiles_Q05958:555	HLSRTEAGLDNYVSSHRLEALRLLREAVLEISDDNTDALVASALILILDSLAN	ECM22	Q05958	555	1.04194	0.100794	0.98714	-0.0317573
A_tiles_Q05958:568	SSHRLEALRLLREAVLEISDDNTDALVASALILILDSLANASSSSPTAWIFHV	ECM22	Q05958	568	1.00631	0.0154433	0.978347	-0.0537108
A_tiles_Q05958:580	EAVLEISDDNTDALVASALILILDSLANASSSSPTAWIFHVKGAVTILTAVWP	ECM22	Q05958	580	1.01625	0.0395604	0.993792	-0.0152785
A_tiles_Q05958:593	LVASALILILDSLANASSSSPTAWIFHVKGAVTILTAVWPLSETSKFYNLISV	ECM22	Q05958	593	1.04992	0.119531	0.973336	-0.066309
A_tiles_Q05958:606	ANASSSSPTAWIFHVKGAVTILTAVWPLSETSKFYNLISVDLSDLGEAVINQS	ECM22	Q05958	606	0.953974	-0.115608	1.05715	0.136371
A_tiles_Q05958:619	HVKGAVTILTAVWPLSETSKFYNLISVDLSDLGEAVINQSNHNNDNDNSNNGD	ECM22	Q05958	619	1.13743	0.315947	1.84586	1.5039
A_tiles_Q05958:632	PLSETSKFYNLISVDLSDLGEAVINQSNHNNDNDNSNNGDGNNNNTISELVCF	ECM22	Q05958	632	2.85254	2.57185	3.29124	2.92285
A_tiles_Q05958:64	TNMKLDCVYSPIQPRRRKDSSSSKFASAVHDRVGKKNLSDNAIMLQQQQQQLH	ECM22	Q05958	64	1.00357	0.00875232	0.964635	-0.0883406
A_tiles_Q05958:645	VDLSDLGEAVINQSNHNNDNDNSNNGDGNNNNTISELVCFDESIADLYPVEID	ECM22	Q05958	645	22.812	7.673	10.7166	5.81935
A_tiles_Q05958:658	SNHNNDNDNSNNGDGNNNNTISELVCFDESIADLYPVEIDSPYLITLAYLDKL	ECM22	Q05958	658	14.7893	6.60966	7.27304	4.8683
A_tiles_Q05958:671	DGNNNNTISELVCFDESIADLYPVEIDSPYLITLAYLDKLHREKNQLDFMLRV	ECM22	Q05958	671	1.27548	0.597	1.57749	1.11842
A_tiles_Q05958:684	FDESIADLYPVEIDSPYLITLAYLDKLHREKNQLDFMLRVFSFPALLDRTFLA	ECM22	Q05958	684	1.07322	0.173366	1.00915	0.0223536
A_tiles_Q05958:697	DSPYLITLAYLDKLHREKNQLDFMLRVFSFPALLDRTFLALLMTGDLGAMRIM	ECM22	Q05958	697	0.990918	-0.0223839	0.981144	-0.0467072
A_tiles_Q05958:709	KLHREKNQLDFMLRVFSFPALLDRTFLALLMTGDLGAMRIMRSYYTLLRGYTT	ECM22	Q05958	709	0.985888	-0.0348718	0.998614	-0.00340221
A_tiles_Q05958:722	RVFSFPALLDRTFLALLMTGDLGAMRIMRSYYTLLRGYTTEIKDKVWFLDSVS	ECM22	Q05958	722	0.969513	-0.0759668	0.980978	-0.0471215
A_tiles_Q05958:735	LALLMTGDLGAMRIMRSYYTLLRGYTTEIKDKVWFLDSVSQVLPQDVDEYSGG	ECM22	Q05958	735	1.0551	0.131609	0.982095	-0.04433
A_tiles_Q05958:748	IMRSYYTLLRGYTTEIKDKVWFLDSVSQVLPQDVDEYSGGGGMHMMLDFLGGG	ECM22	Q05958	748	0.978821	-0.0525224	1.86396	1.52784
A_tiles_Q05958:761	TEIKDKVWFLDSVSQVLPQDVDEYSGGGGMHMMLDFLGGGLPSMTTTNFSAFM	ECM22	Q05958	761	1.60702	1.16392	3.69913	3.2095
A_tiles_Q05958:77	PRRRKDSSSSKFASAVHDRVGKKNLSDNAIMLQQQQQQLHHQQEQQFRQQQQV	ECM22	Q05958	77	1.09921	0.232089	0.970427	-0.0736534
A_tiles_Q05958:90	SAVHDRVGKKNLSDNAIMLQQQQQQLHHQQEQQFRQQQQVQLQQQLLPHVGTD	ECM22	Q05958	90	1.06755	0.160391	1.03637	0.087655
A_tiles_Q12041:0	MEDQDAAFIKQATEAIVDVSLNIDNIDPIIKELLERVRNRQNRLQNKKPALIP	MET32	Q12041	0	1.78882	1.42689	1.3254	0.691201
A_tiles_Q12041:100	AKCSLEFSRSSDLRRHEKTHFAILPNICPQCGKGFARKDALKRHYDTLTCRRN	MET32	Q12041	100	1.03016	0.0729151	0.966812	-0.0828115
A_tiles_Q12041:113	RRHEKTHFAILPNICPQCGKGFARKDALKRHYDTLTCRRNRTKLLTAGGEGIN	MET32	Q12041	113	1.14495	0.332127	0.970396	-0.0737317
A_tiles_Q12041:125	NICPQCGKGFARKDALKRHYDTLTCRRNRTKLLTAGGEGINELLKKVKQSNIV	MET32	Q12041	125	0.972325	-0.0688593	0.968171	-0.0793637
A_tiles_Q12041:13	EAIVDVSLNIDNIDPIIKELLERVRNRQNRLQNKKPALIPAENGVDINSQGGN	MET32	Q12041	13	1.16146	0.367246	1.05542	0.132336
A_tiles_Q12041:138	DALKRHYDTLTCRRNRTKLLTAGGEGINELLKKVKQSNIVHRQDNNHNGSSNG	MET32	Q12041	138	0.829978	-0.457238	0.933856	-0.167904
A_tiles_Q12041:25	IDPIIKELLERVRNRQNRLQNKKPALIPAENGVDINSQGGNIKVKKENALPKP	MET32	Q12041	25	0.935921	-0.162485	0.943448	-0.142832
A_tiles_Q12041:38	NRQNRLQNKKPALIPAENGVDINSQGGNIKVKKENALPKPPKSSKSKPQDRRN	MET32	Q12041	38	0.858642	-0.37393	0.914991	-0.217978
A_tiles_Q12041:50	LIPAENGVDINSQGGNIKVKKENALPKPPKSSKSKPQDRRNSTGEKRFKCAKC	MET32	Q12041	50	0.92376	-0.194575	0.942306	-0.145805
A_tiles_Q12041:63	GGNIKVKKENALPKPPKSSKSKPQDRRNSTGEKRFKCAKCSLEFSRSSDLRRH	MET32	Q12041	63	0.921982	-0.199302	0.938613	-0.155439
A_tiles_Q12041:75	PKPPKSSKSKPQDRRNSTGEKRFKCAKCSLEFSRSSDLRRHEKTHFAILPNIC	MET32	Q12041	75	1.10694	0.249291	0.965323	-0.0865923
A_tiles_Q12041:88	RRNSTGEKRFKCAKCSLEFSRSSDLRRHEKTHFAILPNICPQCGKGFARKDAL	MET32	Q12041	88	1.08065	0.190299	0.973474	-0.065963
A_tiles_Q12151:0	MSEVGIQNHKKAVTKPRRREKVIELIEVDGKKVSTTSTGKRKFHNKSKNGCDN	UPC2	Q12151	0	0.76445	-0.659024	0.936186	-0.161791
A_tiles_Q12151:103	SVESDSSVDLPPTIKKEQTPFNDIQSAVKASGSSNDSFPSSASTTKSESEEKS	UPC2	Q12151	103	0.86582	-0.353505	0.976471	-0.0584204
A_tiles_Q12151:116	IKKEQTPFNDIQSAVKASGSSNDSFPSSASTTKSESEEKSSAPIEDKNNMTPL	UPC2	Q12151	116	0.902102	-0.252784	0.984151	-0.039197
A_tiles_Q12151:128	SAVKASGSSNDSFPSSASTTKSESEEKSSAPIEDKNNMTPLSMGLQGTINKKD	UPC2	Q12151	128	0.88563	-0.298001	0.94511	-0.138513
A_tiles_Q12151:13	TKPRRREKVIELIEVDGKKVSTTSTGKRKFHNKSKNGCDNCKRRRVKCDEGKP	UPC2	Q12151	13	0.975294	-0.0613801	0.933938	-0.167688
A_tiles_Q12151:141	PSSASTTKSESEEKSSAPIEDKNNMTPLSMGLQGTINKKDMMNNFFSQNGTIG	UPC2	Q12151	141	1.11797	0.273616	1.11627	0.269878
A_tiles_Q12151:154	KSSAPIEDKNNMTPLSMGLQGTINKKDMMNNFFSQNGTIGFGSPERLNSGIDG	UPC2	Q12151	154	1.23533	0.51853	2.17298	1.90421
A_tiles_Q12151:167	PLSMGLQGTINKKDMMNNFFSQNGTIGFGSPERLNSGIDGLLLPPLPSGNMGA	UPC2	Q12151	167	1.46882	0.943289	2.3787	2.12614
A_tiles_Q12151:180	DMMNNFFSQNGTIGFGSPERLNSGIDGLLLPPLPSGNMGAFQLQQQQQVQQQS	UPC2	Q12151	180	2.16614	1.89648	4.15076	3.49214
A_tiles_Q12151:193	GFGSPERLNSGIDGLLLPPLPSGNMGAFQLQQQQQVQQQSQPQTQAQQASGTP	UPC2	Q12151	193	1.2319	0.511703	1.37185	0.775726
A_tiles_Q12151:205	DGLLLPPLPSGNMGAFQLQQQQQVQQQSQPQTQAQQASGTPNERYGSFDLAGS	UPC2	Q12151	205	1.28242	0.610316	1.22814	0.504207
A_tiles_Q12151:218	GAFQLQQQQQVQQQSQPQTQAQQASGTPNERYGSFDLAGSPALQSTGMSLSNS	UPC2	Q12151	218	1.32782	0.695671	1.13611	0.313098
A_tiles_Q12151:231	QSQPQTQAQQASGTPNERYGSFDLAGSPALQSTGMSLSNSLSGMLLCNRIPSG	UPC2	Q12151	231	1.03414	0.0823643	1.14702	0.336557
A_tiles_Q12151:244	TPNERYGSFDLAGSPALQSTGMSLSNSLSGMLLCNRIPSGQNYTQQQLQYQLH	UPC2	Q12151	244	1.19739	0.441987	1.11371	0.264243
A_tiles_Q12151:257	SPALQSTGMSLSNSLSGMLLCNRIPSGQNYTQQQLQYQLHQQLQLQQHQQVQL	UPC2	Q12151	257	0.952479	-0.119456	0.993063	-0.0170799
A_tiles_Q12151:26	EVDGKKVSTTSTGKRKFHNKSKNGCDNCKRRRVKCDEGKPACRKCTNMKLECQ	UPC2	Q12151	26	1.05248	0.125502	0.987788	-0.0301483
A_tiles_Q12151:270	SLSGMLLCNRIPSGQNYTQQQLQYQLHQQLQLQQHQQVQLQQYQQLRQEQHQQ	UPC2	Q12151	270	0.958533	-0.103911	1.00197	0.00483553
A_tiles_Q12151:282	SGQNYTQQQLQYQLHQQLQLQQHQQVQLQQYQQLRQEQHQQVQQQQQEQLQQY	UPC2	Q12151	282	1.26061	0.568235	1.02653	0.0642473
A_tiles_Q12151:295	LHQQLQLQQHQQVQLQQYQQLRQEQHQQVQQQQQEQLQQYQQHFLQQQQQVLL	UPC2	Q12151	295	1.04826	0.115635	0.991587	-0.0207293
A_tiles_Q12151:308	QLQQYQQLRQEQHQQVQQQQQEQLQQYQQHFLQQQQQVLLQQEQQPNDEEGGV	UPC2	Q12151	308	1.30376	0.650823	1.23948	0.526756
A_tiles_Q12151:321	QQVQQQQQEQLQQYQQHFLQQQQQVLLQQEQQPNDEEGGVQEENSKKVKEGPL	UPC2	Q12151	321	1.16993	0.385067	1.0853	0.200849
A_tiles_Q12151:334	YQQHFLQQQQQVLLQQEQQPNDEEGGVQEENSKKVKEGPLQSQTSETTLNSDA	UPC2	Q12151	334	1.00509	0.0124551	0.999643	-0.000875187
A_tiles_Q12151:347	LQQEQQPNDEEGGVQEENSKKVKEGPLQSQTSETTLNSDAATLQADALSQLSK	UPC2	Q12151	347	0.939232	-0.15382	0.998882	-0.0027446
A_tiles_Q12151:359	GVQEENSKKVKEGPLQSQTSETTLNSDAATLQADALSQLSKMGLSLKSLSTFP	UPC2	Q12151	359	1.42321	0.865906	1.03022	0.0730539
A_tiles_Q12151:372	PLQSQTSETTLNSDAATLQADALSQLSKMGLSLKSLSTFPTAGIGGVSYDFQE	UPC2	Q12151	372	2.66523	2.4052	1.40595	0.835961
A_tiles_Q12151:385	DAATLQADALSQLSKMGLSLKSLSTFPTAGIGGVSYDFQELLGIKFPINNGNS	UPC2	Q12151	385	2.48253	2.23097	1.23311	0.514109
A_tiles_Q12151:39	KRKFHNKSKNGCDNCKRRRVKCDEGKPACRKCTNMKLECQYTPIHLRKGRGAT	UPC2	Q12151	39	0.962244	-0.0944306	0.965457	-0.0862512
A_tiles_Q12151:398	SKMGLSLKSLSTFPTAGIGGVSYDFQELLGIKFPINNGNSRATKASNAEEALA	UPC2	Q12151	398	2.4156	2.16391	1.40497	0.834248
A_tiles_Q12151:411	PTAGIGGVSYDFQELLGIKFPINNGNSRATKASNAEEALANMQEHHERAAASV	UPC2	Q12151	411	3.31619	2.94137	2.01659	1.72095
A_tiles_Q12151:424	ELLGIKFPINNGNSRATKASNAEEALANMQEHHERAAASVKENDGQLSDTKSP	UPC2	Q12151	424	0.963226	-0.0919273	0.940485	-0.150548
A_tiles_Q12151:436	NSRATKASNAEEALANMQEHHERAAASVKENDGQLSDTKSPAPSNNAQGGSAS	UPC2	Q12151	436	0.922611	-0.197629	0.930127	-0.177721
A_tiles_Q12151:449	LANMQEHHERAAASVKENDGQLSDTKSPAPSNNAQGGSASIMEPQAADAVSTM	UPC2	Q12151	449	0.915157	-0.217532	0.975271	-0.0614361
A_tiles_Q12151:462	SVKENDGQLSDTKSPAPSNNAQGGSASIMEPQAADAVSTMAPISMIERNMNRN	UPC2	Q12151	462	0.913848	-0.221043	0.993057	-0.0170938
A_tiles_Q12151:475	SPAPSNNAQGGSASIMEPQAADAVSTMAPISMIERNMNRNSNISPSTPSAVLN	UPC2	Q12151	475	1.07614	0.180049	1.02947	0.0712576
A_tiles_Q12151:488	SIMEPQAADAVSTMAPISMIERNMNRNSNISPSTPSAVLNDRQEMQDSISSLG	UPC2	Q12151	488	1.18574	0.418012	1.10347	0.24158
A_tiles_Q12151:501	MAPISMIERNMNRNSNISPSTPSAVLNDRQEMQDSISSLGNLTKAALENNEPT	UPC2	Q12151	501	1.04898	0.117332	1.00593	0.0145008
A_tiles_Q12151:51	DNCKRRRVKCDEGKPACRKCTNMKLECQYTPIHLRKGRGATVVKYVTRKADGS	UPC2	Q12151	51	0.902922	-0.250555	0.962585	-0.093562
A_tiles_Q12151:513	RNSNISPSTPSAVLNDRQEMQDSISSLGNLTKAALENNEPTISLQTSQTENED	UPC2	Q12151	513	0.909819	-0.231885	0.997773	-0.00547035
A_tiles_Q12151:526	LNDRQEMQDSISSLGNLTKAALENNEPTISLQTSQTENEDDASRQDMTSKINN	UPC2	Q12151	526	0.80119	-0.54385	1.0121	0.029503
A_tiles_Q12151:539	LGNLTKAALENNEPTISLQTSQTENEDDASRQDMTSKINNEADRSSVSAGTSN	UPC2	Q12151	539	0.816861	-0.496323	0.937969	-0.157122
A_tiles_Q12151:552	PTISLQTSQTENEDDASRQDMTSKINNEADRSSVSAGTSNIAKLLDLSTKGNL	UPC2	Q12151	552	0.784606	-0.59517	0.967371	-0.0813927
A_tiles_Q12151:565	DDASRQDMTSKINNEADRSSVSAGTSNIAKLLDLSTKGNLNLIDMKLFHHYCT	UPC2	Q12151	565	1.05399	0.129017	1.07482	0.177026
A_tiles_Q12151:578	NEADRSSVSAGTSNIAKLLDLSTKGNLNLIDMKLFHHYCTKVWPTITAAKVSG	UPC2	Q12151	578	0.938705	-0.155197	1.02335	0.0566382
A_tiles_Q12151:590	SNIAKLLDLSTKGNLNLIDMKLFHHYCTKVWPTITAAKVSGPEIWRDYIPELA	UPC2	Q12151	590	0.989217	-0.0265993	1.01444	0.0351841
A_tiles_Q12151:603	NLNLIDMKLFHHYCTKVWPTITAAKVSGPEIWRDYIPELAFDYPFLMHALLAF	UPC2	Q12151	603	1.00994	0.0242617	0.975222	-0.061561
A_tiles_Q12151:616	CTKVWPTITAAKVSGPEIWRDYIPELAFDYPFLMHALLAFSATHLSRTETGLE	UPC2	Q12151	616	1.03509	0.0846148	0.978465	-0.0534158
A_tiles_Q12151:629	SGPEIWRDYIPELAFDYPFLMHALLAFSATHLSRTETGLEQYVSSHRLDALRL	UPC2	Q12151	629	1.0255	0.0617792	0.977224	-0.0565298
A_tiles_Q12151:64	KPACRKCTNMKLECQYTPIHLRKGRGATVVKYVTRKADGSVESDSSVDLPPTI	UPC2	Q12151	64	0.962264	-0.094381	0.97005	-0.0746068
A_tiles_Q12151:642	AFDYPFLMHALLAFSATHLSRTETGLEQYVSSHRLDALRLLREAVLEISENNT	UPC2	Q12151	642	0.992877	-0.0175399	0.968132	-0.0794631
A_tiles_Q12151:655	FSATHLSRTETGLEQYVSSHRLDALRLLREAVLEISENNTDALVASALILIMD	UPC2	Q12151	655	0.917893	-0.210207	0.996523	-0.00854638
A_tiles_Q12151:667	LEQYVSSHRLDALRLLREAVLEISENNTDALVASALILIMDSLANASGNGTVG	UPC2	Q12151	667	0.980609	-0.0480454	0.974668	-0.0629536
A_tiles_Q12151:680	RLLREAVLEISENNTDALVASALILIMDSLANASGNGTVGNQSLNSMSPSAWI	UPC2	Q12151	680	0.973179	-0.0667047	0.99253	-0.0183969
A_tiles_Q12151:693	NTDALVASALILIMDSLANASGNGTVGNQSLNSMSPSAWIFHVKGAATILTAV	UPC2	Q12151	693	0.966414	-0.0838204	0.974614	-0.0630901
A_tiles_Q12151:706	MDSLANASGNGTVGNQSLNSMSPSAWIFHVKGAATILTAVWPLSERSKFHNII	UPC2	Q12151	706	1.03988	0.0959385	1.00506	0.0123898
A_tiles_Q12151:719	GNQSLNSMSPSAWIFHVKGAATILTAVWPLSERSKFHNIISVDLSDLGDVINP	UPC2	Q12151	719	0.912334	-0.225114	1.07898	0.1865
A_tiles_Q12151:732	IFHVKGAATILTAVWPLSERSKFHNIISVDLSDLGDVINPDVGTITELVCFDE	UPC2	Q12151	732	1.05755	0.13729	1.30138	0.646328
A_tiles_Q12151:744	AVWPLSERSKFHNIISVDLSDLGDVINPDVGTITELVCFDESIADLYPVGLDS	UPC2	Q12151	744	20.4699	7.4072	11.5168	5.99604
A_tiles_Q12151:757	IISVDLSDLGDVINPDVGTITELVCFDESIADLYPVGLDSPYLITLAYLDKLH	UPC2	Q12151	757	1.09418	0.220828	1.79599	1.43671
A_tiles_Q12151:77	CQYTPIHLRKGRGATVVKYVTRKADGSVESDSSVDLPPTIKKEQTPFNDIQSA	UPC2	Q12151	77	0.871881	-0.336389	0.972398	-0.0686747
A_tiles_Q12151:770	NPDVGTITELVCFDESIADLYPVGLDSPYLITLAYLDKLHREKNQGDFILRVF	UPC2	Q12151	770	1.11946	0.276873	1.34864	0.733856
A_tiles_Q12151:783	DESIADLYPVGLDSPYLITLAYLDKLHREKNQGDFILRVFTFPALLDKTFLAL	UPC2	Q12151	783	0.959148	-0.102337	1.0083	0.0202691
A_tiles_Q12151:796	SPYLITLAYLDKLHREKNQGDFILRVFTFPALLDKTFLALLMTGDLGAMRIMR	UPC2	Q12151	796	0.98563	-0.0355145	0.981657	-0.0454249
A_tiles_Q12151:809	HREKNQGDFILRVFTFPALLDKTFLALLMTGDLGAMRIMRSYYKLLRGFATEV	UPC2	Q12151	809	0.940136	-0.15146	0.99485	-0.0126673
A_tiles_Q12151:821	VFTFPALLDKTFLALLMTGDLGAMRIMRSYYKLLRGFATEVKDKVWFLEGVTQ	UPC2	Q12151	821	0.997202	-0.00687384	0.980194	-0.0490829
A_tiles_Q12151:834	ALLMTGDLGAMRIMRSYYKLLRGFATEVKDKVWFLEGVTQVLPQDVDEYSGGG	UPC2	Q12151	834	0.928666	-0.181578	0.972582	-0.0682111
A_tiles_Q12151:847	MRSYYKLLRGFATEVKDKVWFLEGVTQVLPQDVDEYSGGGGMHMMLDFLGGGL	UPC2	Q12151	847	0.97734	-0.0562373	1.41815	0.857166
A_tiles_Q12151:860	EVKDKVWFLEGVTQVLPQDVDEYSGGGGMHMMLDFLGGGLPSMTTTNFSDFSL	UPC2	Q12151	860	4.88057	3.88954	8.71332	5.31161
A_tiles_Q12151:90	ATVVKYVTRKADGSVESDSSVDLPPTIKKEQTPFNDIQSAVKASGSSNDSFPS	UPC2	Q12151	90	0.837815	-0.434177	0.998713	-0.00315974
A_controls-mean_OAF1	NNSINATPIVDNSSGSQLPNGFDRGQANNTPFPGYFGGLDLFDYDFLFGNDFA	OAF1	P39720	994	91.4561	11.08	45.1167	9.34625
A_controls-mean_PIP2	SGSNINNNDNVKLPSNFKNYYDPPMSSLDISMDVPDIFGSLDFFDYDLLFQND	PIP2	P52960	943	148.709	12.2727	74.5229	10.5776
B_Gal4mut_R3:Scramble1	MFSTKTEDSNNTDMANETKYGDYDQNNAITYPFTPDLWVLTKDGGGPDTPPNF				10.1291	5.68101	6.38228	4.54774
B_Gal4mut_R3:Scramble2	NATKYMKINLTFDDDKNETVTPQLMPPNDGNTFNPAYGTPSFSYWTTDEDDGG				4.05604	3.4355	4.75252	3.82431
B_Gal4mut_R3:Scramble3	VTNDTPDQTDIFTNAFGYKPPTEDWNPDDGMGNNMGLKLTSNYTTSEAYKPDF				6.94752	4.75595	9.30847	5.47372
B_Gal4mut_R3:Scramble4	DNQTFNGEPMAYTFTDMILETYTGPKGPNLSTTWKNDYAFDNDSDDNVKPTPG				16.5263	6.88213	8.66187	5.29708
B_Gal4mut_R3:Scramble5	GPYYIDQFTNAEVKNWADPMPNGTTNSKPMLSDDGYLNPTEKDFNDTGTFDTT				3.63934	3.16952	5.07834	3.987
B_Gal4mut_R3:Scramble6	GTAEKYPIVDTANTDLDFQFPGKMNFNKLNPMWPDNDSTGTYNTTTPDGSEYD				4.65411	3.77297	7.63651	4.98795
B_Gal4mut_R3:Scramble7	GTDQAYLIPTTKKTDTPDFKMFSPEGTDWYETNDVGYNANPDFNMTLDPGNNS				8.36844	5.21252	9.40752	5.49969
B_Gal4mut_R3:Scramble8	PQGDDDTINNMTTPDMKKYNFFPPWVGNLTTANNADYDSLEYDSTKPTTFGGE				3.83338	3.29697	4.5656	3.72586
B_Gcn4mut_R3:Scramble1	SLNPDISMTVEVDSKTEFTLAVFEDDFEYTTLSLDPDWETPSPIDSNSNEDVF				26.287	8.02088	35.0813	8.72897
B_Gcn4mut_R3:Scramble2	FNMEFTFKEVPDTALDLSSDVSETPDWPYVEVSNFPDDIETSEDDTLINLSTS				2.41693	2.16527	26.4834	8.03915
B_Gcn4mut_R3:Scramble3	NPPDFKLNPDYPITIDVLETLFFDLDDTVEWETEVDSESSTAVNMSSSSEDTF				20.7549	7.44112	35.6328	8.76724
B_Gcn4mut_R3:Scramble4	PSMDLTFTNSDLTSTLEDKPYFLSEEDNPFEDTEIDINSTEFAVVVDDSWPSV				46.4275	9.41651	20.8821	7.45612
B_Gcn4mut_R3:Scramble5	LEPVDSEWLLKTPTEVFTVLTNTPEFSNDSIYNDTDESMPSDDSEIDDVFSAF				20.351	7.39291	6.42547	4.56429
B_Gcn4mut_R3:Scramble6	VDIFPYSPDETTDLLINENSVFSVTTFFAMDLSNTEESVDPDKDEPWSSTEDL				5.92929	4.36711	7.76776	5.02976
B_Gcn4mut_R3:Scramble7	MSNSADSTFPYTSDDLFEPNSDEDTLEVPSFITELLPWVDNDEIETTKFVSVD				59.2635	10.0154	34.7681	8.70696
B_Gcn4mut_R3:Scramble8	TTEKEPLDTPFEEDDVNDVTMETPDITFSDFDLNNIPDSSLSVFYLVEWASSS				10.4657	5.76122	20.4811	7.40854
B_Hap4mut_R3:Scramble1	HSEGAAFSEDLELNQNQIHQKYPEYEFDSLLSNDTLLTEDELMPCTDDEDRHG				9.65697	5.5639	17.6377	7.04182
B_Hap4mut_R3:Scramble2	SDEGIHPNNHMGYHENDLDLDLYLEATCLLSFDQPTFQTKARLSESEQEEDED				36.8946	8.85262	26.8558	8.07341
B_Hap4mut_R3:Scramble3	DTCAGERALYLSLEQFLNHEHNDSQEEHTSFIDEPLNKDMLDYEEDSQTLDPG				5.19114	4.04091	4.29295	3.57478
B_Hap4mut_R3:Scramble4	LFYNSHYNPSNCLDMTGFTQRDEDEEEAESDTAHGLELKELHLQIEDLQPSDD				2.03163	1.73919	1.82567	1.47691
B_Hap4mut_R3:Scramble5	PDNLHCMDELIEHELYNLEGYLFDTSSFLRESEDDDQEKQDPTAESNALHGQT				60.2981	10.0579	28.8551	8.24959
B_Hap4mut_R3:Scramble6	RSNDEPDCDSNTIYQDEAHDAGLLLSLDFQLLQTESYEGNEFLEDHHKPMEET				5.40694	4.14084	24.5827	7.85642
B_Hap4mut_R3:Scramble7	ITNSFRCYESDYDEDEFQQLLNAPGAEDGLEEETHLQNTPMKHDLLSLHDDES				10.2015	5.69848	5.44077	4.15614
B_Hap4mut_R3:Scramble8	DAFDHGKPDYINSDRDEESLMLQEDETELHQNQYLLLSNTPEEDLEHGCSFAT				6.82558	4.71251	4.98187	3.93995
B_Met4mut_R2:A13G	VTNRGNTNLYDHGVTPEILLEQLAYVDNFIPSLDNEFSNVDWNVNTTHNNANN				35.8298	8.78077	38.1133	8.93236
B_Met4mut_R2:A24G	VTNRGNTNLYDHAVTPEILLEQLGYVDNFIPSLDNEFSNVDWNVNTTHNNANN				27.6309	8.14322	36.2664	8.81048
B_Met4mut_R2:A51G	VTNRGNTNLYDHAVTPEILLEQLAYVDNFIPSLDNEFSNVDWNVNTTHNNGNN				32.1101	8.51183	38.2672	8.94224
B_Met4mut_R2:D11A	VTNRGNTNLYAHAVTPEILLEQLAYVDNFIPSLDNEFSNVDWNVNTTHNNANN				25.5683	7.95287	20.3809	7.39651
B_Met4mut_R2:D11G	VTNRGNTNLYGHAVTPEILLEQLAYVDNFIPSLDNEFSNVDWNVNTTHNNANN				21.2932	7.50395	25.1575	7.91313
B_Met4mut_R2:D27A	VTNRGNTNLYDHAVTPEILLEQLAYVANFIPSLDNEFSNVDWNVNTTHNNANN				13.302	6.34962	6.64354	4.64618
B_Met4mut_R2:D27G	VTNRGNTNLYDHAVTPEILLEQLAYVGNFIPSLDNEFSNVDWNVNTTHNNANN				20.6526	7.429	13.0719	6.3068
B_Met4mut_R2:D34A_R6:DelAcid-34	VTNRGNTNLYDHAVTPEILLEQLAYVDNFIPSLANEFSNVDWNVNTTHNNANN				21.47	7.52424	15.6297	6.74528
B_Met4mut_R2:D34G	VTNRGNTNLYDHAVTPEILLEQLAYVDNFIPSLGNEFSNVDWNVNTTHNNANN				22.8488	7.67696	22.5985	7.64992
B_Met4mut_R2:D41A_R6:DelAcid-41	VTNRGNTNLYDHAVTPEILLEQLAYVDNFIPSLDNEFSNVAWNVNTTHNNANN				24.5181	7.84996	22.7712	7.6686
B_Met4mut_R2:D41G	VTNRGNTNLYDHAVTPEILLEQLAYVDNFIPSLDNEFSNVGWNVNTTHNNANN				26.8796	8.07558	28.2206	8.19504
B_Met4mut_R2:E17A	VTNRGNTNLYDHAVTPAILLEQLAYVDNFIPSLDNEFSNVDWNVNTTHNNANN				10.5377	5.77805	13.6995	6.42187
B_Met4mut_R2:E17G	VTNRGNTNLYDHAVTPGILLEQLAYVDNFIPSLDNEFSNVDWNVNTTHNNANN				7.56791	4.96581	19.703	7.31351
B_Met4mut_R2:E21A_R6:DelAcid-21	VTNRGNTNLYDHAVTPEILLAQLAYVDNFIPSLDNEFSNVDWNVNTTHNNANN				13.6436	6.41182	11.6855	6.03173
B_Met4mut_R2:E21G	VTNRGNTNLYDHAVTPEILLGQLAYVDNFIPSLDNEFSNVDWNVNTTHNNANN				20.5251	7.41381	16.5874	6.89119
B_Met4mut_R2:E36A	VTNRGNTNLYDHAVTPEILLEQLAYVDNFIPSLDNAFSNVDWNVNTTHNNANN				27.6799	8.14757	23.1238	7.7063
B_Met4mut_R2:E36G	VTNRGNTNLYDHAVTPEILLEQLAYVDNFIPSLDNGFSNVDWNVNTTHNNANN				27.7084	8.1501	26.1219	8.00543
B_Met4mut_R2:F29A_R4:DelArom-29	VTNRGNTNLYDHAVTPEILLEQLAYVDNAIPSLDNEFSNVDWNVNTTHNNANN				19.5268	7.29148	24.4092	7.83904
B_Met4mut_R2:F29G	VTNRGNTNLYDHAVTPEILLEQLAYVDNGIPSLDNEFSNVDWNVNTTHNNANN				14.1214	6.49627	28.5232	8.2212
B_Met4mut_R2:F37A_R4:DelArom-37	VTNRGNTNLYDHAVTPEILLEQLAYVDNFIPSLDNEASNVDWNVNTTHNNANN				18.7876	7.19679	24.6509	7.86321
B_Met4mut_R2:F37G	VTNRGNTNLYDHAVTPEILLEQLAYVDNFIPSLDNEGSNVDWNVNTTHNNANN				15.9787	6.79946	26.8729	8.07497
B_Met4mut_R2:G5A	VTNRANTNLYDHAVTPEILLEQLAYVDNFIPSLDNEFSNVDWNVNTTHNNANN				39.8431	9.04126	31.6401	8.47565
B_Met4mut_R2:H12A	VTNRGNTNLYDAAVTPEILLEQLAYVDNFIPSLDNEFSNVDWNVNTTHNNANN				49.3697	9.56727	32.9592	8.57587
B_Met4mut_R2:H12G	VTNRGNTNLYDGAVTPEILLEQLAYVDNFIPSLDNEFSNVDWNVNTTHNNANN				30.7655	8.40688	35.5161	8.75919
B_Met4mut_R2:H48A	VTNRGNTNLYDHAVTPEILLEQLAYVDNFIPSLDNEFSNVDWNVNTTANNANN				39.8624	9.04245	35.3514	8.74779
B_Met4mut_R2:H48G	VTNRGNTNLYDHAVTPEILLEQLAYVDNFIPSLDNEFSNVDWNVNTTGNNANN				35.2178	8.7385	40.1606	9.06073
B_Met4mut_R2:I18A	VTNRGNTNLYDHAVTPEALLEQLAYVDNFIPSLDNEFSNVDWNVNTTHNNANN				22.9462	7.68739	38.2447	8.9408
B_Met4mut_R2:I30A	VTNRGNTNLYDHAVTPEILLEQLAYVDNFAPSLDNEFSNVDWNVNTTHNNANN				26.7493	8.06366	30.5457	8.38929
B_Met4mut_R2:I30G	VTNRGNTNLYDHAVTPEILLEQLAYVDNFGPSLDNEFSNVDWNVNTTHNNANN				18.9182	7.21378	35.7263	8.77366
B_Met4mut_R2:L19A	VTNRGNTNLYDHAVTPEIALEQLAYVDNFIPSLDNEFSNVDWNVNTTHNNANN				49.683	9.58279	36.0974	8.79902
B_Met4mut_R2:L19G	VTNRGNTNLYDHAVTPEIGLEQLAYVDNFIPSLDNEFSNVDWNVNTTHNNANN				52.6813	9.72657	42.2978	9.18795
B_Met4mut_R2:L20A	VTNRGNTNLYDHAVTPEILAEQLAYVDNFIPSLDNEFSNVDWNVNTTHNNANN				29.2265	8.28097	33.7795	8.63619
B_Met4mut_R2:L20G	VTNRGNTNLYDHAVTPEILGEQLAYVDNFIPSLDNEFSNVDWNVNTTHNNANN				32.8554	8.56813	38.1838	8.93689
B_Met4mut_R2:L23A	VTNRGNTNLYDHAVTPEILLEQAAYVDNFIPSLDNEFSNVDWNVNTTHNNANN				33.5007	8.61586	35.5509	8.76159
B_Met4mut_R2:L23G	VTNRGNTNLYDHAVTPEILLEQGAYVDNFIPSLDNEFSNVDWNVNTTHNNANN				32.6919	8.55589	34.354	8.67757
B_Met4mut_R2:L33A	VTNRGNTNLYDHAVTPEILLEQLAYVDNFIPSADNEFSNVDWNVNTTHNNANN				17.3294	6.99856	29.4311	8.29808
B_Met4mut_R2:L33G	VTNRGNTNLYDHAVTPEILLEQLAYVDNFIPSGDNEFSNVDWNVNTTHNNANN				12.819	6.25886	32.2697	8.52399
B_Met4mut_R2:L9A	VTNRGNTNAYDHAVTPEILLEQLAYVDNFIPSLDNEFSNVDWNVNTTHNNANN				32.3524	8.53028	38.4269	8.95246
B_Met4mut_R2:L9G	VTNRGNTNGYDHAVTPEILLEQLAYVDNFIPSLDNEFSNVDWNVNTTHNNANN				26.7668	8.06527	39.3232	9.00904
B_Met4mut_R2:N28A	VTNRGNTNLYDHAVTPEILLEQLAYVDAFIPSLDNEFSNVDWNVNTTHNNANN				39.3359	9.00983	23.8412	7.78127
B_Met4mut_R2:N28G	VTNRGNTNLYDHAVTPEILLEQLAYVDGFIPSLDNEFSNVDWNVNTTHNNANN				34.6207	8.69654	30.1413	8.35659
B_Met4mut_R2:N35A	VTNRGNTNLYDHAVTPEILLEQLAYVDNFIPSLDAEFSNVDWNVNTTHNNANN				32.3682	8.53148	30.5525	8.38983
B_Met4mut_R2:N35G	VTNRGNTNLYDHAVTPEILLEQLAYVDNFIPSLDGEFSNVDWNVNTTHNNANN				39.8908	9.0442	33.4406	8.61145
B_Met4mut_R2:N39A	VTNRGNTNLYDHAVTPEILLEQLAYVDNFIPSLDNEFSAVDWNVNTTHNNANN				35.7625	8.77615	28.5867	8.22665
B_Met4mut_R2:N39G	VTNRGNTNLYDHAVTPEILLEQLAYVDNFIPSLDNEFSGVDWNVNTTHNNANN				31.2814	8.44768	34.4646	8.68545
B_Met4mut_R2:N3A	VTARGNTNLYDHAVTPEILLEQLAYVDNFIPSLDNEFSNVDWNVNTTHNNANN				34.3644	8.67831	31.0838	8.43213
B_Met4mut_R2:N3G	VTGRGNTNLYDHAVTPEILLEQLAYVDNFIPSLDNEFSNVDWNVNTTHNNANN				32.8509	8.5678	33.6153	8.62423
B_Met4mut_R2:N43A	VTNRGNTNLYDHAVTPEILLEQLAYVDNFIPSLDNEFSNVDWAVNTTHNNANN				33.3107	8.6019	29.7313	8.32298
B_Met4mut_R2:N43G	VTNRGNTNLYDHAVTPEILLEQLAYVDNFIPSLDNEFSNVDWGVNTTHNNANN				39.6359	9.02847	34.5772	8.69345
B_Met4mut_R2:N45A	VTNRGNTNLYDHAVTPEILLEQLAYVDNFIPSLDNEFSNVDWNVATTHNNANN				31.2682	8.44664	29.3609	8.29222
B_Met4mut_R2:N45G	VTNRGNTNLYDHAVTPEILLEQLAYVDNFIPSLDNEFSNVDWNVGTTHNNANN				38.5989	8.96342	33.576	8.62136
B_Met4mut_R2:N49A	VTNRGNTNLYDHAVTPEILLEQLAYVDNFIPSLDNEFSNVDWNVNTTHANANN				33.878	8.64333	30.1476	8.3571
B_Met4mut_R2:N49G	VTNRGNTNLYDHAVTPEILLEQLAYVDNFIPSLDNEFSNVDWNVNTTHGNANN				37.3609	8.88344	35.8252	8.78045
B_Met4mut_R2:N50A	VTNRGNTNLYDHAVTPEILLEQLAYVDNFIPSLDNEFSNVDWNVNTTHNAANN				31.2068	8.44182	31.2426	8.44463
B_Met4mut_R2:N50G	VTNRGNTNLYDHAVTPEILLEQLAYVDNFIPSLDNEFSNVDWNVNTTHNGANN				37.0525	8.8631	35.3062	8.74465
B_Met4mut_R2:N52A	VTNRGNTNLYDHAVTPEILLEQLAYVDNFIPSLDNEFSNVDWNVNTTHNNAAN				34.2721	8.67171	29.5665	8.30935
B_Met4mut_R2:N52G	VTNRGNTNLYDHAVTPEILLEQLAYVDNFIPSLDNEFSNVDWNVNTTHNNAGN				31.917	8.49703	33.6864	8.62942
B_Met4mut_R2:N53A	VTNRGNTNLYDHAVTPEILLEQLAYVDNFIPSLDNEFSNVDWNVNTTHNNANA				17.5472	7.02921	28.8971	8.25315
B_Met4mut_R2:N53G	VTNRGNTNLYDHAVTPEILLEQLAYVDNFIPSLDNEFSNVDWNVNTTHNNANG				26.2901	8.02117	33.0618	8.58349
B_Met4mut_R2:N6A	VTNRGATNLYDHAVTPEILLEQLAYVDNFIPSLDNEFSNVDWNVNTTHNNANN				32.1556	8.5153	31.1009	8.43348
B_Met4mut_R2:N6G	VTNRGGTNLYDHAVTPEILLEQLAYVDNFIPSLDNEFSNVDWNVNTTHNNANN				31.668	8.47781	33.5185	8.61716
B_Met4mut_R2:N8A	VTNRGNTALYDHAVTPEILLEQLAYVDNFIPSLDNEFSNVDWNVNTTHNNANN				33.8913	8.6443	30.8128	8.41065
B_Met4mut_R2:N8G	VTNRGNTGLYDHAVTPEILLEQLAYVDNFIPSLDNEFSNVDWNVNTTHNNANN				27.2338	8.1077	33.3402	8.60407
B_Met4mut_R2:P16A	VTNRGNTNLYDHAVTAEILLEQLAYVDNFIPSLDNEFSNVDWNVNTTHNNANN				33.9224	8.64654	24.5809	7.85624
B_Met4mut_R2:P16G	VTNRGNTNLYDHAVTGEILLEQLAYVDNFIPSLDNEFSNVDWNVNTTHNNANN				30.08	8.35159	33.8331	8.64008
B_Met4mut_R2:P31A	VTNRGNTNLYDHAVTPEILLEQLAYVDNFIASLDNEFSNVDWNVNTTHNNANN				49.3679	9.56718	28.4837	8.2178
B_Met4mut_R2:P31G	VTNRGNTNLYDHAVTPEILLEQLAYVDNFIGSLDNEFSNVDWNVNTTHNNANN				47.3223	9.46335	32.0278	8.50553
B_Met4mut_R2:Q22A	VTNRGNTNLYDHAVTPEILLEALAYVDNFIPSLDNEFSNVDWNVNTTHNNANN				21.0431	7.47496	20.0732	7.35918
B_Met4mut_R2:Q22G	VTNRGNTNLYDHAVTPEILLEGLAYVDNFIPSLDNEFSNVDWNVNTTHNNANN				50.9615	9.64513	30.2055	8.3618
B_Met4mut_R2:R4A	VTNAGNTNLYDHAVTPEILLEQLAYVDNFIPSLDNEFSNVDWNVNTTHNNANN				36.8865	8.85208	35.0891	8.72951
B_Met4mut_R2:R4G	VTNGGNTNLYDHAVTPEILLEQLAYVDNFIPSLDNEFSNVDWNVNTTHNNANN				45.8905	9.38797	37.0989	8.86617
B_Met4mut_R2:S32A	VTNRGNTNLYDHAVTPEILLEQLAYVDNFIPALDNEFSNVDWNVNTTHNNANN				36.0744	8.79746	27.2535	8.10948
B_Met4mut_R2:S32G	VTNRGNTNLYDHAVTPEILLEQLAYVDNFIPGLDNEFSNVDWNVNTTHNNANN				33.1082	8.58693	32.3024	8.52648
B_Met4mut_R2:S38A	VTNRGNTNLYDHAVTPEILLEQLAYVDNFIPSLDNEFANVDWNVNTTHNNANN				35.0288	8.7253	30.4779	8.38384
B_Met4mut_R2:S38G	VTNRGNTNLYDHAVTPEILLEQLAYVDNFIPSLDNEFGNVDWNVNTTHNNANN				36.0462	8.79554	33.9541	8.64884
B_Met4mut_R2:T15A	VTNRGNTNLYDHAVAPEILLEQLAYVDNFIPSLDNEFSNVDWNVNTTHNNANN				30.6468	8.39739	31.7346	8.48297
B_Met4mut_R2:T15G	VTNRGNTNLYDHAVGPEILLEQLAYVDNFIPSLDNEFSNVDWNVNTTHNNANN				26.4657	8.03751	35.9977	8.79223
B_Met4mut_R2:T2A	VANRGNTNLYDHAVTPEILLEQLAYVDNFIPSLDNEFSNVDWNVNTTHNNANN				37.6259	8.90078	32.0297	8.50568
B_Met4mut_R2:T2G	VGNRGNTNLYDHAVTPEILLEQLAYVDNFIPSLDNEFSNVDWNVNTTHNNANN				34.785	8.70816	34.2661	8.67128
B_Met4mut_R2:T46A	VTNRGNTNLYDHAVTPEILLEQLAYVDNFIPSLDNEFSNVDWNVNATHNNANN				32.5511	8.5453	30.3821	8.37611
B_Met4mut_R2:T46G	VTNRGNTNLYDHAVTPEILLEQLAYVDNFIPSLDNEFSNVDWNVNGTHNNANN				31.4579	8.46149	34.009	8.6528
B_Met4mut_R2:T47A	VTNRGNTNLYDHAVTPEILLEQLAYVDNFIPSLDNEFSNVDWNVNTAHNNANN				33.3529	8.60501	28.3228	8.2039
B_Met4mut_R2:T47G	VTNRGNTNLYDHAVTPEILLEQLAYVDNFIPSLDNEFSNVDWNVNTGHNNANN				32.0924	8.51048	34.0046	8.65249
B_Met4mut_R2:T7A	VTNRGNANLYDHAVTPEILLEQLAYVDNFIPSLDNEFSNVDWNVNTTHNNANN				32.2712	8.52411	31.7181	8.48169
B_Met4mut_R2:T7G	VTNRGNGNLYDHAVTPEILLEQLAYVDNFIPSLDNEFSNVDWNVNTTHNNANN				30.9442	8.42109	33.1992	8.59367
B_Met4mut_R2:V14A	VTNRGNTNLYDHAATPEILLEQLAYVDNFIPSLDNEFSNVDWNVNTTHNNANN				23.2076	7.71519	37.2563	8.87656
B_Met4mut_R2:V14G	VTNRGNTNLYDHAGTPEILLEQLAYVDNFIPSLDNEFSNVDWNVNTTHNNANN				26.2167	8.01431	41.9687	9.16878
B_Met4mut_R2:V1A	ATNRGNTNLYDHAVTPEILLEQLAYVDNFIPSLDNEFSNVDWNVNTTHNNANN				36.5429	8.82912	37.0535	8.86316
B_Met4mut_R2:V1G	GTNRGNTNLYDHAVTPEILLEQLAYVDNFIPSLDNEFSNVDWNVNTTHNNANN				38.6427	8.9662	38.2926	8.94387
B_Met4mut_R2:V26A	VTNRGNTNLYDHAVTPEILLEQLAYADNFIPSLDNEFSNVDWNVNTTHNNANN				27.3016	8.1138	33.4306	8.61071
B_Met4mut_R2:V26G	VTNRGNTNLYDHAVTPEILLEQLAYGDNFIPSLDNEFSNVDWNVNTTHNNANN				19.1971	7.24969	36.7652	8.844
B_Met4mut_R2:V40A	VTNRGNTNLYDHAVTPEILLEQLAYVDNFIPSLDNEFSNADWNVNTTHNNANN				25.2549	7.92261	31.4617	8.46178
B_Met4mut_R2:V40G	VTNRGNTNLYDHAVTPEILLEQLAYVDNFIPSLDNEFSNGDWNVNTTHNNANN				25.4316	7.93972	35.0665	8.72794
B_Met4mut_R2:V44A	VTNRGNTNLYDHAVTPEILLEQLAYVDNFIPSLDNEFSNVDWNANTTHNNANN				28.2975	8.20171	33.9867	8.65119
B_Met4mut_R2:V44G	VTNRGNTNLYDHAVTPEILLEQLAYVDNFIPSLDNEFSNVDWNGNTTHNNANN				25.7242	7.96778	36.0835	8.79808
B_Met4mut_R2:W42A_R4:DelArom-42	VTNRGNTNLYDHAVTPEILLEQLAYVDNFIPSLDNEFSNVDANVNTTHNNANN				15.077	6.65693	24.5059	7.84874
B_Met4mut_R2:W42G	VTNRGNTNLYDHAVTPEILLEQLAYVDNFIPSLDNEFSNVDGNVNTTHNNANN				15.2141	6.67915	27.4747	8.12931
B_Met4mut_R2:Y10A_R4:DelArom-10	VTNRGNTNLADHAVTPEILLEQLAYVDNFIPSLDNEFSNVDWNVNTTHNNANN				26.6995	8.05908	37.2613	8.87688
B_Met4mut_R2:Y10G	VTNRGNTNLGDHAVTPEILLEQLAYVDNFIPSLDNEFSNVDWNVNTTHNNANN				25.5571	7.95179	39.4653	9.01788
B_Met4mut_R2:Y25A_R4:DelArom-25	VTNRGNTNLYDHAVTPEILLEQLAAVDNFIPSLDNEFSNVDWNVNTTHNNANN				20.9559	7.46478	33.1434	8.58954
B_Met4mut_R2:Y25G	VTNRGNTNLYDHAVTPEILLEQLAGVDNFIPSLDNEFSNVDWNVNTTHNNANN				21.3554	7.51111	35.8594	8.78279
B_Met4mut_R3:Scramble1	NNTNIPEYESVLFWDDHVVATNENNTAHLLNSPGDITNDFVLNNVQTYNALRN				19.6052	7.30131	9.96392	5.64067
B_Met4mut_R3:Scramble2	NDEHVNYVILDNSQILVVFTDVLGYANNTHTPTNERNNLFSWAPLNDNTNEAN				1.08373	0.197288	5.43432	4.15323
B_Met4mut_R3:Scramble3	ANVHDNFNYLVFTTIPNTEDSDTELENVNVNLYTPLANIANSDVQHNWNNLRG				4.48224	3.68065	2.99485	2.6913
B_Met4mut_R3:Scramble4	VNNTFGYYNVDLNNPASEHAFTNNHNTDDEWNDLQSLRLIAVELNNTNPITVV				1.50278	0.999375	2.46295	2.21154
B_Met4mut_R3:Scramble5	VDSQFDANYTSLNNYEVTENNELNHNNTPGVADWNNVDINLHITRPVTFLANL				1.32357	0.687822	1.4881	0.975288
B_Met4mut_R3:Scramble6	LFDIVPNNYVPLARVQFLNANSVAGDSDNEVENTWNDEHNLLTNTNNHNTYIT				1.09757	0.228416	1.56807	1.10373
B_Met4mut_R3:Scramble7	NWNGRYHNTFNESTDNIYVFVLHAEANNDATNVTNVEPLLVNDNISTLPNQDL				1.09668	0.226436	3.75753	3.24793
B_Met4mut_R3:Scramble8	TDGSLNESQTNILWHVVNRHILTNPVLLNNNYDAEEVNDAYTANVTNFNDPNF				2.62647	2.36926	1.80387	1.44744
B_Met4mut_R4:DelArom-10-25	VTNRGNTNLADHAVTPEILLEQLAAVDNFIPSLDNEFSNVDWNVNTTHNNANN				13.9549	6.46718	33.8577	8.64186
B_Met4mut_R4:DelArom-10-25-29	VTNRGNTNLADHAVTPEILLEQLAAVDNAIPSLDNEFSNVDWNVNTTHNNANN				5.25673	4.07171	15.1282	6.66525
B_Met4mut_R4:DelArom-10-25-29-37	VTNRGNTNLADHAVTPEILLEQLAAVDNAIPSLDNEASNVDWNVNTTHNNANN				1.59382	1.14369	4.36637	3.61639
B_Met4mut_R4:DelArom-10-25-29-37-42	VTNRGNTNLADHAVTPEILLEQLAAVDNAIPSLDNEASNVDANVNTTHNNANN				1.1003	0.234508	2.11504	1.8379
B_Met4mut_R4:DelArom-10-25-29-42	VTNRGNTNLADHAVTPEILLEQLAAVDNAIPSLDNEFSNVDANVNTTHNNANN				1.20295	0.453364	5.45841	4.16408
B_Met4mut_R4:DelArom-10-25-37	VTNRGNTNLADHAVTPEILLEQLAAVDNFIPSLDNEASNVDWNVNTTHNNANN				2.91224	2.62267	17.7173	7.05288
B_Met4mut_R4:DelArom-10-25-37-42	VTNRGNTNLADHAVTPEILLEQLAAVDNFIPSLDNEASNVDANVNTTHNNANN				1.46716	0.940521	8.25869	5.18013
B_Met4mut_R4:DelArom-10-25-42	VTNRGNTNLADHAVTPEILLEQLAAVDNFIPSLDNEFSNVDANVNTTHNNANN				3.45357	3.04097	19.1353	7.24179
B_Met4mut_R4:DelArom-10-29	VTNRGNTNLADHAVTPEILLEQLAYVDNAIPSLDNEFSNVDWNVNTTHNNANN				12.5818	6.21304	23.9659	7.79408
B_Met4mut_R4:DelArom-10-29-37	VTNRGNTNLADHAVTPEILLEQLAYVDNAIPSLDNEASNVDWNVNTTHNNANN				3.26662	2.90442	9.33266	5.48008
B_Met4mut_R4:DelArom-10-29-37-42	VTNRGNTNLADHAVTPEILLEQLAYVDNAIPSLDNEASNVDANVNTTHNNANN				1.3929	0.813089	4.32179	3.59121
B_Met4mut_R4:DelArom-10-29-42	VTNRGNTNLADHAVTPEILLEQLAYVDNAIPSLDNEFSNVDANVNTTHNNANN				3.06519	2.74826	11.2119	5.9302
B_Met4mut_R4:DelArom-10-37	VTNRGNTNLADHAVTPEILLEQLAYVDNFIPSLDNEASNVDWNVNTTHNNANN				12.6368	6.22374	25.4897	7.94531
B_Met4mut_R4:DelArom-10-37-42	VTNRGNTNLADHAVTPEILLEQLAYVDNFIPSLDNEASNVDANVNTTHNNANN				4.09353	3.45807	14.7425	6.60189
B_Met4mut_R4:DelArom-10-42	VTNRGNTNLADHAVTPEILLEQLAYVDNFIPSLDNEFSNVDANVNTTHNNANN				13.3946	6.36664	25.4934	7.94567
B_Met4mut_R4:DelArom-25-29	VTNRGNTNLYDHAVTPEILLEQLAAVDNAIPSLDNEFSNVDWNVNTTHNNANN				7.68166	5.00241	16.7511	6.91528
B_Met4mut_R4:DelArom-25-29-37	VTNRGNTNLYDHAVTPEILLEQLAAVDNAIPSLDNEASNVDWNVNTTHNNANN				1.96459	1.65685	5.40541	4.14015
B_Met4mut_R4:DelArom-25-29-37-42	VTNRGNTNLYDHAVTPEILLEQLAAVDNAIPSLDNEASNVDANVNTTHNNANN				1.06758	0.16044	2.59734	2.3419
B_Met4mut_R4:DelArom-25-29-42	VTNRGNTNLYDHAVTPEILLEQLAAVDNAIPSLDNEFSNVDANVNTTHNNANN				1.79383	1.43374	6.55826	4.61448
B_Met4mut_R4:DelArom-25-37	VTNRGNTNLYDHAVTPEILLEQLAAVDNFIPSLDNEASNVDWNVNTTHNNANN				6.88779	4.73477	18.576	7.16899
B_Met4mut_R4:DelArom-25-37-42	VTNRGNTNLYDHAVTPEILLEQLAAVDNFIPSLDNEASNVDANVNTTHNNANN				1.88994	1.5618	9.23879	5.45528
B_Met4mut_R4:DelArom-25-42	VTNRGNTNLYDHAVTPEILLEQLAAVDNFIPSLDNEFSNVDANVNTTHNNANN				5.4683	4.16853	19.6487	7.30674
B_Met4mut_R4:DelArom-29-37	VTNRGNTNLYDHAVTPEILLEQLAYVDNAIPSLDNEASNVDWNVNTTHNNANN				5.01758	3.95747	10.518	5.77344
B_Met4mut_R4:DelArom-29-37-42	VTNRGNTNLYDHAVTPEILLEQLAYVDNAIPSLDNEASNVDANVNTTHNNANN				1.83884	1.49455	5.09751	3.99625
B_Met4mut_R4:DelArom-29-42	VTNRGNTNLYDHAVTPEILLEQLAYVDNAIPSLDNEFSNVDANVNTTHNNANN				4.36338	3.6147	12.3521	6.16784
B_Met4mut_R4:DelArom-37-42	VTNRGNTNLYDHAVTPEILLEQLAYVDNFIPSLDNEASNVDANVNTTHNNANN				5.58969	4.2224	14.9874	6.64231
B_Met4mut_R5:AddF-16	VTNRGNTNLYDHAVTFEILLEQLAYVDNFIPSLDNEFSNVDWNVNTTHNNANN				39.9255	9.04633	13.2579	6.34147
B_Met4mut_R5:AddF-16-31	VTNRGNTNLYDHAVTFEILLEQLAYVDNFIFSLDNEFSNVDWNVNTTHNNANN				6.64954	4.6484	4.93203	3.91527
B_Met4mut_R5:AddF-16-31-51	VTNRGNTNLYDHAVTFEILLEQLAYVDNFIFSLDNEFSNVDWNVNTTHNNFNN				4.85175	3.87501	4.72578	3.81047
B_Met4mut_R5:AddF-16-31-51-38	VTNRGNTNLYDHAVTFEILLEQLAYVDNFIFSLDNEFFNVDWNVNTTHNNFNN				2.91324	2.62351	3.82335	3.29054
B_Met4mut_R5:AddF-38	VTNRGNTNLYDHAVTPEILLEQLAYVDNFIPSLDNEFFNVDWNVNTTHNNANN				72.4832	10.5095	34.5491	8.69146
B_Met4mut_R5:AddF-38-15	VTNRGNTNLYDHAVFPEILLEQLAYVDNFIPSLDNEFFNVDWNVNTTHNNANN				47.6337	9.47945	19.9864	7.34855
B_Met4mut_R5:AddF-38-15-13	VTNRGNTNLYDHFVFPEILLEQLAYVDNFIPSLDNEFFNVDWNVNTTHNNANN				39.3141	9.00846	11.9332	6.08318
B_Met4mut_R5:AddF-38-15-13-40	VTNRGNTNLYDHFVFPEILLEQLAYVDNFIPSLDNEFFNFDWNVNTTHNNANN				55.2769	9.84457	11.5633	6.00591
B_Met4mut_R5:AddF-45	VTNRGNTNLYDHAVTPEILLEQLAYVDNFIPSLDNEFSNVDWNVFTTHNNANN				57.4099	9.93747	31.645	8.47604
B_Met4mut_R5:AddF-45-49	VTNRGNTNLYDHAVTPEILLEQLAYVDNFIPSLDNEFSNVDWNVFTTHFNANN				52.937	9.73845	18.9679	7.22023
B_Met4mut_R5:AddF-45-49-28	VTNRGNTNLYDHAVTPEILLEQLAYVDFFIPSLDNEFSNVDWNVFTTHFNANN				26.3096	8.023	4.62251	3.75626
B_Met4mut_R5:AddF-45-49-28-26	VTNRGNTNLYDHAVTPEILLEQLAYFDFFIPSLDNEFSNVDWNVFTTHFNANN				22.2767	7.61474	3.26769	2.90523
B_Met4mut_R5:AddF-46	VTNRGNTNLYDHAVTPEILLEQLAYVDNFIPSLDNEFSNVDWNVNFTHNNANN				53.9735	9.78602	30.3531	8.37377
B_Met4mut_R5:AddF-46-4	VTNFGNTNLYDHAVTPEILLEQLAYVDNFIPSLDNEFSNVDWNVNFTHNNANN				53.7126	9.77413	25.5873	7.95469
B_Met4mut_R5:AddF-46-4-22	VTNFGNTNLYDHAVTPEILLEFLAYVDNFIPSLDNEFSNVDWNVNFTHNNANN				8.70863	5.31029	5.19291	4.04174
B_Met4mut_R5:AddF-46-4-22-32	VTNFGNTNLYDHAVTPEILLEFLAYVDNFIPFLDNEFSNVDWNVNFTHNNANN				6.24804	4.49559	2.35859	2.10532
B_Met4mut_R5:AddF-53	VTNRGNTNLYDHAVTPEILLEQLAYVDNFIPSLDNEFSNVDWNVNTTHNNANF				26.8649	8.07424	26.9487	8.08188
B_Met4mut_R5:AddF-53-28	VTNRGNTNLYDHAVTPEILLEQLAYVDFFIPSLDNEFSNVDWNVNTTHNNANF				20.3248	7.38975	8.51576	5.25533
B_Met4mut_R5:AddF-53-28-48	VTNRGNTNLYDHAVTPEILLEQLAYVDFFIPSLDNEFSNVDWNVNTTFNNANF				14.8211	6.61494	7.96343	5.0908
B_Met4mut_R5:AddF-53-28-48-43	VTNRGNTNLYDHAVTPEILLEQLAYVDFFIPSLDNEFSNVDWFVNTTFNNANF				5.8847	4.34859	2.90836	2.6194
B_Met4mut_R5:AddL-16	VTNRGNTNLYDHAVTLEILLEQLAYVDNFIPSLDNEFSNVDWNVNTTHNNANN				22.7834	7.66992	14.0824	6.4895
B_Met4mut_R5:AddL-16-31	VTNRGNTNLYDHAVTLEILLEQLAYVDNFILSLDNEFSNVDWNVNTTHNNANN				5.09819	3.99657	5.46397	4.16658
B_Met4mut_R5:AddL-16-31-51	VTNRGNTNLYDHAVTLEILLEQLAYVDNFILSLDNEFSNVDWNVNTTHNNLNN				4.51459	3.69829	4.25047	3.55038
B_Met4mut_R5:AddL-16-31-51-38	VTNRGNTNLYDHAVTLEILLEQLAYVDNFILSLDNEFLNVDWNVNTTHNNLNN				4.98617	3.94206	3.14246	2.80935
B_Met4mut_R5:AddL-38	VTNRGNTNLYDHAVTPEILLEQLAYVDNFIPSLDNEFLNVDWNVNTTHNNANN				57.9906	9.96216	32.6067	8.54949
B_Met4mut_R5:AddL-38-15	VTNRGNTNLYDHAVLPEILLEQLAYVDNFIPSLDNEFLNVDWNVNTTHNNANN				38.0675	8.92941	19.0138	7.22615
B_Met4mut_R5:AddL-38-15-13	VTNRGNTNLYDHLVLPEILLEQLAYVDNFIPSLDNEFLNVDWNVNTTHNNANN				88.1762	10.9903	11.9613	6.08896
B_Met4mut_R5:AddL-38-15-13-40	VTNRGNTNLYDHLVLPEILLEQLAYVDNFIPSLDNEFLNLDWNVNTTHNNANN				66.7365	10.3068	12.8347	6.26187
B_Met4mut_R5:AddL-45	VTNRGNTNLYDHAVTPEILLEQLAYVDNFIPSLDNEFSNVDWNVLTTHNNANN				49.5817	9.57779	29.8864	8.33575
B_Met4mut_R5:AddL-45-49	VTNRGNTNLYDHAVTPEILLEQLAYVDNFIPSLDNEFSNVDWNVLTTHLNANN				55.9059	9.87233	17.3246	6.99788
B_Met4mut_R5:AddL-45-49-28	VTNRGNTNLYDHAVTPEILLEQLAYVDLFIPSLDNEFSNVDWNVLTTHLNANN				23.6265	7.75907	4.25642	3.55381
B_Met4mut_R5:AddL-45-49-28-26	VTNRGNTNLYDHAVTPEILLEQLAYLDLFIPSLDNEFSNVDWNVLTTHLNANN				16.0731	6.8139	3.10334	2.77861
B_Met4mut_R5:AddL-46	VTNRGNTNLYDHAVTPEILLEQLAYVDNFIPSLDNEFSNVDWNVNLTHNNANN				47.7857	9.48726	27.5336	8.13457
B_Met4mut_R5:AddL-46-4	VTNLGNTNLYDHAVTPEILLEQLAYVDNFIPSLDNEFSNVDWNVNLTHNNANN				48.6248	9.52997	23.7799	7.77495
B_Met4mut_R5:AddL-46-4-22	VTNLGNTNLYDHAVTPEILLELLAYVDNFIPSLDNEFSNVDWNVNLTHNNANN				12.0061	6.09813	4.18301	3.51112
B_Met4mut_R5:AddL-46-4-22-32	VTNLGNTNLYDHAVTPEILLELLAYVDNFIPLLDNEFSNVDWNVNLTHNNANN				5.21694	4.05307	2.1327	1.8583
B_Met4mut_R5:AddL-53	VTNRGNTNLYDHAVTPEILLEQLAYVDNFIPSLDNEFSNVDWNVNTTHNNANL				11.1308	5.9124	22.2638	7.61332
B_Met4mut_R5:AddL-53-28	VTNRGNTNLYDHAVTPEILLEQLAYVDLFIPSLDNEFSNVDWNVNTTHNNANL				4.3839	3.62622	6.11618	4.44325
B_Met4mut_R5:AddL-53-28-48	VTNRGNTNLYDHAVTPEILLEQLAYVDLFIPSLDNEFSNVDWNVNTTLNNANL				3.90725	3.3438	4.56489	3.72548
B_Met4mut_R5:AddL-53-28-48-43	VTNRGNTNLYDHAVTPEILLEQLAYVDLFIPSLDNEFSNVDWLVNTTLNNANL				2.30344	2.04727	2.2695	2.01084
B_Met4mut_R5:AddW-16	VTNRGNTNLYDHAVTWEILLEQLAYVDNFIPSLDNEFSNVDWNVNTTHNNANN				37.5511	8.89589	10.4506	5.75769
B_Met4mut_R5:AddW-16-31	VTNRGNTNLYDHAVTWEILLEQLAYVDNFIWSLDNEFSNVDWNVNTTHNNANN				4.46205	3.66957	4.2677	3.56031
B_Met4mut_R5:AddW-16-31-51	VTNRGNTNLYDHAVTWEILLEQLAYVDNFIWSLDNEFSNVDWNVNTTHNNWNN				3.96926	3.38244	4.11065	3.46831
B_Met4mut_R5:AddW-16-31-51-38	VTNRGNTNLYDHAVTWEILLEQLAYVDNFIWSLDNEFWNVDWNVNTTHNNWNN				2.35199	2.09844	3.09757	2.77404
B_Met4mut_R5:AddW-38	VTNRGNTNLYDHAVTPEILLEQLAYVDNFIPSLDNEFWNVDWNVNTTHNNANN				74.5008	10.5768	35.6154	8.76604
B_Met4mut_R5:AddW-38-15	VTNRGNTNLYDHAVWPEILLEQLAYVDNFIPSLDNEFWNVDWNVNTTHNNANN				57.0394	9.92158	17.3997	7.00849
B_Met4mut_R5:AddW-38-15-13	VTNRGNTNLYDHWVWPEILLEQLAYVDNFIPSLDNEFWNVDWNVNTTHNNANN				36.301	8.81282	7.70624	5.01025
B_Met4mut_R5:AddW-38-15-13-40	VTNRGNTNLYDHWVWPEILLEQLAYVDNFIPSLDNEFWNWDWNVNTTHNNANN				42.5595	9.20308	8.2742	5.18473
B_Met4mut_R5:AddW-45	VTNRGNTNLYDHAVTPEILLEQLAYVDNFIPSLDNEFSNVDWNVWTTHNNANN				33.6453	8.62642	30.5776	8.39185
B_Met4mut_R5:AddW-45-49	VTNRGNTNLYDHAVTPEILLEQLAYVDNFIPSLDNEFSNVDWNVWTTHWNANN				46.5529	9.42313	17.6842	7.04828
B_Met4mut_R5:AddW-45-49-28	VTNRGNTNLYDHAVTPEILLEQLAYVDWFIPSLDNEFSNVDWNVWTTHWNANN				24.2487	7.82285	4.93312	3.91582
B_Met4mut_R5:AddW-45-49-28-26	VTNRGNTNLYDHAVTPEILLEQLAYWDWFIPSLDNEFSNVDWNVWTTHWNANN				17.6902	7.04911	2.88188	2.59696
B_Met4mut_R5:AddW-46	VTNRGNTNLYDHAVTPEILLEQLAYVDNFIPSLDNEFSNVDWNVNWTHNNANN				51.3491	9.66372	34.9535	8.72002
B_Met4mut_R5:AddW-46-4	VTNWGNTNLYDHAVTPEILLEQLAYVDNFIPSLDNEFSNVDWNVNWTHNNANN				51.6964	9.68026	30.6919	8.401
B_Met4mut_R5:AddW-46-4-22	VTNWGNTNLYDHAVTPEILLEWLAYVDNFIPSLDNEFSNVDWNVNWTHNNANN				8.07264	5.12422	6.27224	4.50507
B_Met4mut_R5:AddW-46-4-22-32	VTNWGNTNLYDHAVTPEILLEWLAYVDNFIPWLDNEFSNVDWNVNWTHNNANN				4.75578	3.82599	2.95075	2.6549
B_Met4mut_R5:AddW-53	VTNRGNTNLYDHAVTPEILLEQLAYVDNFIPSLDNEFSNVDWNVNTTHNNANW				20.6461	7.42823	26.8685	8.07457
B_Met4mut_R5:AddW-53-28	VTNRGNTNLYDHAVTPEILLEQLAYVDWFIPSLDNEFSNVDWNVNTTHNNANW				12.7022	6.23641	9.47062	5.51609
B_Met4mut_R5:AddW-53-28-48	VTNRGNTNLYDHAVTPEILLEQLAYVDWFIPSLDNEFSNVDWNVNTTWNNANW				5.35735	4.11823	11.7619	6.0477
B_Met4mut_R5:AddW-53-28-48-43	VTNRGNTNLYDHAVTPEILLEQLAYVDWFIPSLDNEFSNVDWWVNTTWNNANW				2.04672	1.75734	4.7533	3.82471
B_Met4mut_R6:DelAcid-11-17-21	VTNRGNTNLYAHAVTPAILLAQLAYVDNFIPSLDNEFSNVDWNVNTTHNNANN				3.06107	2.74496	1.70916	1.31511
B_Met4mut_R6:DelAcid-11-17-21-27-34-36-41	VTNRGNTNLYAHAVTPAILLAQLAYVANFIPSLANAFSNVAWNVNTTHNNANN				0.916073	-0.215077	0.964528	-0.0886145
B_Met4mut_R6:DelAcid-11-17-21-27-36-41	VTNRGNTNLYAHAVTPAILLAQLAYVANFIPSLDNAFSNVAWNVNTTHNNANN				0.929594	-0.179129	0.99011	-0.0243868
B_Met4mut_R6:DelAcid-11-17-27	VTNRGNTNLYAHAVTPAILLEQLAYVANFIPSLDNEFSNVDWNVNTTHNNANN				2.56506	2.31121	1.44914	0.910192
B_Met4mut_R6:DelAcid-11-17-27-34-36	VTNRGNTNLYAHAVTPAILLEQLAYVANFIPSLANAFSNVDWNVNTTHNNANN				0.979771	-0.0501432	1.01378	0.0335903
B_Met4mut_R6:DelAcid-11-17-27-34-36-41	VTNRGNTNLYAHAVTPAILLEQLAYVANFIPSLANAFSNVAWNVNTTHNNANN				0.924502	-0.192605	0.975942	-0.0597489
B_Met4mut_R6:DelAcid-11-17-27-34-41	VTNRGNTNLYAHAVTPAILLEQLAYVANFIPSLANEFSNVAWNVNTTHNNANN				1.02669	0.0646333	1.01844	0.0448382
B_Met4mut_R6:DelAcid-11-17-34-36	VTNRGNTNLYAHAVTPAILLEQLAYVDNFIPSLANAFSNVDWNVNTTHNNANN				2.31023	2.05449	1.31523	0.672302
B_Met4mut_R6:DelAcid-11-21-27-34-36	VTNRGNTNLYAHAVTPEILLAQLAYVANFIPSLANAFSNVDWNVNTTHNNANN				1.01626	0.0395736	1.0105	0.0256189
B_Met4mut_R6:DelAcid-11-21-27-34-36-41	VTNRGNTNLYAHAVTPEILLAQLAYVANFIPSLANAFSNVAWNVNTTHNNANN				0.944381	-0.140406	0.975958	-0.059708
B_Met4mut_R6:DelAcid-11-34-41	VTNRGNTNLYAHAVTPEILLEQLAYVDNFIPSLANEFSNVAWNVNTTHNNANN				10.3253	5.72809	2.83402	2.55587
B_Met4mut_R6:DelAcid-17-27-36-41	VTNRGNTNLYDHAVTPAILLEQLAYVANFIPSLDNAFSNVAWNVNTTHNNANN				1.70842	1.31405	1.21468	0.477173
B_Met4mut_R6:DelAcid-17-34-36-41	VTNRGNTNLYDHAVTPAILLEQLAYVDNFIPSLANAFSNVAWNVNTTHNNANN				2.19439	1.92826	1.26224	0.571401
B_Met4mut_R6:DelAcid-21-41	VTNRGNTNLYDHAVTPEILLAQLAYVDNFIPSLDNEFSNVAWNVNTTHNNANN				8.77483	5.32887	5.75859	4.29544
B_Met4mut_R6:DelAcid-27-34	VTNRGNTNLYDHAVTPEILLEQLAYVANFIPSLANEFSNVDWNVNTTHNNANN				2.02996	1.73717	2.10967	1.83166
B_Met4mut_R6:DelAcid-34-41	VTNRGNTNLYDHAVTPEILLEQLAYVDNFIPSLANEFSNVAWNVNTTHNNANN				15.1272	6.6651	6.23386	4.49001
B_Met4mut_R7:AddAcid-1-2-7-8-14-26-35-39-44-45	DDNRGNDDLYDHADTPEILLEQLAYDDNFIPSLDDEFSDVDWNDDTTHNNANN				28.2052	8.19369	35.4374	8.75375
B_Met4mut_R7:AddAcid-1-43-52	DTNRGNTNLYDHAVTPEILLEQLAYVDNFIPSLDNEFSNVDWDVNTTHNNADN				41.7314	9.15487	48.7602	9.53679
B_Met4mut_R7:AddAcid-1-7-8-26-31-32-40-43	DTNRGNDDLYDHAVTPEILLEQLAYDDNFIDDLDNEFSNDDWDVNTTHNNANN				18.4581	7.15337	35.6924	8.77134
B_Met4mut_R7:AddAcid-1-8-12-15-22-26-38-48	DTNRGNTDLYDDAVDPEILLEDLAYDDNFIPSLDNEFDNVDWNVNTTDNNANN				89.1779	11.0181	64.3721	10.2183
B_Met4mut_R7:AddAcid-1-8-16-35-38-43-49	DTNRGNTDLYDHAVTDEILLEQLAYVDNFIPSLDDEFDNVDWDVNTTHDNANN				77.6454	10.6783	60.0378	10.0473
B_Met4mut_R7:AddAcid-12-32-38-44	VTNRGNTNLYDDAVTPEILLEQLAYVDNFIPDLDNEFDNVDWNDNTTHNNANN				54.1468	9.79389	46.1607	9.40237
B_Met4mut_R7:AddAcid-15	VTNRGNTNLYDHAVDPEILLEQLAYVDNFIPSLDNEFSNVDWNVNTTHNNANN				52.6355	9.72444	51.1703	9.65516
B_Met4mut_R7:AddAcid-16-51	VTNRGNTNLYDHAVTDEILLEQLAYVDNFIPSLDNEFSNVDWNVNTTHNNDNN				58.8988	10.0003	58.3225	9.97616
B_Met4mut_R7:AddAcid-2-3-4-13-16-22-39-51	VDDDGNTNLYDHDVTDEILLEDLAYVDNFIPSLDNEFSDVDWNVNTTHNNDNN				99.9384	11.2976	76.7374	10.6494
B_Met4mut_R7:AddAcid-2-5-8-22-24-38	VDNRDNTDLYDHAVTPEILLEDLDYVDNFIPSLDNEFDNVDWNVNTTHNNANN				112.253	11.5827	68.8484	10.3833
B_Met4mut_R7:AddAcid-2-7-15-39-40	VDNRGNDNLYDHAVDPEILLEQLAYVDNFIPSLDNEFSDDDWNVNTTHNNANN				40.824	9.10094	51.0741	9.65055
B_Met4mut_R7:AddAcid-2-7-22-52	VDNRGNDNLYDHAVTPEILLEDLAYVDNFIPSLDNEFSNVDWNVNTTHNNADN				108.024	11.4884	64.9571	10.2405
B_Met4mut_R7:AddAcid-24-28-40-45-48-52	VTNRGNTNLYDHAVTPEILLEQLDYVDDFIPSLDNEFSNDDWNVDTTDNNADN				43.6551	9.26544	54.0727	9.79053
B_Met4mut_R7:AddAcid-3-14-22-38-40-46-47-48-52	VTDRGNTNLYDHADTPEILLEDLAYVDNFIPSLDNEFDNDDWNVNDDDNNADN				80.4016	10.7639	50.8004	9.63737
B_Met4mut_R7:AddAcid-3-22	VTDRGNTNLYDHAVTPEILLEDLAYVDNFIPSLDNEFSNVDWNVNTTHNNANN				109.611	11.5242	57.0125	9.92042
B_Met4mut_R7:AddAcid-3-4-15-26-39-50-52	VTDDGNTNLYDHAVDPEILLEQLAYDDNFIPSLDNEFSDVDWNVNTTHNDADN				62.3847	10.1414	69.7425	10.4149
B_Met4mut_R7:AddAcid-3-5-6-14-35-53	VTDRDDTNLYDHADTPEILLEQLAYVDNFIPSLDDEFSNVDWNVNTTHNNAND				57.4752	9.94025	62.6555	10.152
B_Met4mut_R7:AddAcid-4-12-15-16-24-28-44-50-51	VTNDGNTNLYDDAVDDEILLEQLDYVDDFIPSLDNEFSNVDWNDNTTHNDDNN				81.0856	10.7847	73.7125	10.5507
B_Met4mut_R7:AddAcid-4-16-24-26-32-39-52	VTNDGNTNLYDHAVTDEILLEQLDYDDNFIPDLDNEFSDVDWNVNTTHNNADN				92.9106	11.1187	63.1411	10.1709
B_Met4mut_R7:AddAcid-4-5-51	VTNDDNTNLYDHAVTPEILLEQLAYVDNFIPSLDNEFSNVDWNVNTTHNNDNN				46.1902	9.40394	51.3304	9.66283
B_Met4mut_R7:AddAcid-4-8-12-15-16-40-44-45-50	VTNDGNTDLYDDAVDDEILLEQLAYVDNFIPSLDNEFSNDDWNDDTTHNDANN				79.4429	10.7344	52.3062	9.70904
B_Met4mut_R7:AddAcid-45-47	VTNRGNTNLYDHAVTPEILLEQLAYVDNFIPSLDNEFSNVDWNVDTDHNNANN				40.011	9.05157	38.382	8.94959
B_Met4mut_R7:AddAcid-5-14-15-32-47	VTNRDNTNLYDHADDPEILLEQLAYVDNFIPDLDNEFSNVDWNVNTDHNNANN				62.7432	10.1554	66.1997	10.287
B_Met4mut_R7:AddAcid-5-24-40	VTNRDNTNLYDHAVTPEILLEQLDYVDNFIPSLDNEFSNDDWNVNTTHNNANN				68.4389	10.3686	54.711	9.81932
B_Met4mut_R7:AddAcid-5-6-14-26-28-31-47-48-49-50	VTNRDDTNLYDHADTPEILLEQLAYDDDFIDSLDNEFSNVDWNVNTDDDDANN				29.7439	8.32402	57.4733	9.94017
B_Met4mut_R7:AddAcid-52	VTNRGNTNLYDHAVTPEILLEQLAYVDNFIPSLDNEFSNVDWNVNTTHNNADN				28.9444	8.25717	40.5503	9.08443
B_Met4mut_R7:AddAcid-7	VTNRGNDNLYDHAVTPEILLEQLAYVDNFIPSLDNEFSNVDWNVNTTHNNANN				36.1147	8.8002	37.9584	8.92236
B_Met4mut_R7:AddAcid-7-35-38-49-50	VTNRGNDNLYDHAVTPEILLEQLAYVDNFIPSLDDEFDNVDWNVNTTHDDANN				40.4142	9.07618	46.9642	9.44472
B_Met4mut_WT1	VTNRGNTNLYDHAVTPEILLEQLAYVDNFIPSLDNEFSNVDWNVNTTHNNANN				28.7501	8.24064	34.5934	8.6946
B_Met4mut_WT2	VTNRGNTNLYDHAVTPEILLEQLAYVDNFIPSLDNEFSNVDWNVNTTHNNANN				38.4976	8.95697	34.5934	8.6946
B_Met4mut_WT3	VTNRGNTNLYDHAVTPEILLEQLAYVDNFIPSLDNEFSNVDWNVNTTHNNANN				30.435	8.38038	34.5934	8.6946
B_Met4mut_WT4	VTNRGNTNLYDHAVTPEILLEQLAYVDNFIPSLDNEFSNVDWNVNTTHNNANN				30.9536	8.42184	34.5934	8.6946
B_Met4mut_WT5	VTNRGNTNLYDHAVTPEILLEQLAYVDNFIPSLDNEFSNVDWNVNTTHNNANN				35.9989	8.79232	34.5934	8.6946
B_Met4mut_WT6	VTNRGNTNLYDHAVTPEILLEQLAYVDNFIPSLDNEFSNVDWNVNTTHNNANN				27.0015	8.08668	34.5934	8.6946
B_Met4mut_WT7	VTNRGNTNLYDHAVTPEILLEQLAYVDNFIPSLDNEFSNVDWNVNTTHNNANN				24.4303	7.84116	34.5934	8.6946
B_Pdr1mut_R2:A21G	NNNNKNNINNINNNNSNNFSGTSFNLGTLDEFVNNGDLEDLYSILWSDVYPDS				158.824	12.4342	89.0356	11.0141
B_Pdr1mut_R2:D30A	NNNNKNNINNINNNNSNNFSATSFNLGTLAEFVNNGDLEDLYSILWSDVYPDS				86.219	10.9353	52.3132	9.70937
B_Pdr1mut_R2:D30G	NNNNKNNINNINNNNSNNFSATSFNLGTLGEFVNNGDLEDLYSILWSDVYPDS				153.921	12.3572	64.3599	10.2178
B_Pdr1mut_R2:D37A	NNNNKNNINNINNNNSNNFSATSFNLGTLDEFVNNGALEDLYSILWSDVYPDS				128.228	11.9091	56.7259	9.90806
B_Pdr1mut_R2:D37G	NNNNKNNINNINNNNSNNFSATSFNLGTLDEFVNNGGLEDLYSILWSDVYPDS				119.614	11.7385	64.5671	10.2257
B_Pdr1mut_R2:D40A	NNNNKNNINNINNNNSNNFSATSFNLGTLDEFVNNGDLEALYSILWSDVYPDS				135.985	12.0533	55.57	9.85755
B_Pdr1mut_R2:D40G	NNNNKNNINNINNNNSNNFSATSFNLGTLDEFVNNGDLEGLYSILWSDVYPDS				120.739	11.7615	63.5191	10.1856
B_Pdr1mut_R2:D48A_R6:DelAcid-48	NNNNKNNINNINNNNSNNFSATSFNLGTLDEFVNNGDLEDLYSILWSAVYPDS				77.9998	10.6895	58.8618	9.99874
B_Pdr1mut_R2:D48G	NNNNKNNINNINNNNSNNFSATSFNLGTLDEFVNNGDLEDLYSILWSGVYPDS				154.537	12.367	72.3436	10.5048
B_Pdr1mut_R2:D52G	NNNNKNNINNINNNNSNNFSATSFNLGTLDEFVNNGDLEDLYSILWSDVYPGS				169.694	12.5966	75.4024	10.6064
B_Pdr1mut_R2:E31A_R6:DelAcid-31	NNNNKNNINNINNNNSNNFSATSFNLGTLDAFVNNGDLEDLYSILWSDVYPDS				147.494	12.2526	66.623	10.3026
B_Pdr1mut_R2:E39G	NNNNKNNINNINNNNSNNFSATSFNLGTLDEFVNNGDLGDLYSILWSDVYPDS				139.997	12.1246	70.3612	10.4366
B_Pdr1mut_R2:F19A_R4:DelArom-19	NNNNKNNINNINNNNSNNASATSFNLGTLDEFVNNGDLEDLYSILWSDVYPDS				164.906	12.5264	79.5185	10.7368
B_Pdr1mut_R2:F19G	NNNNKNNINNINNNNSNNGSATSFNLGTLDEFVNNGDLEDLYSILWSDVYPDS				164.817	12.525	81.1424	10.7864
B_Pdr1mut_R2:F24G	NNNNKNNINNINNNNSNNFSATSGNLGTLDEFVNNGDLEDLYSILWSDVYPDS				172.683	12.6394	81.6067	10.8004
B_Pdr1mut_R2:F32A_R4:DelArom-32	NNNNKNNINNINNNNSNNFSATSFNLGTLDEAVNNGDLEDLYSILWSDVYPDS				160.616	12.4617	66.59	10.3014
B_Pdr1mut_R2:G27A	NNNNKNNINNINNNNSNNFSATSFNLATLDEFVNNGDLEDLYSILWSDVYPDS				136.898	12.0697	78.6479	10.7098
B_Pdr1mut_R2:G36A	NNNNKNNINNINNNNSNNFSATSFNLGTLDEFVNNADLEDLYSILWSDVYPDS				151.117	12.3121	77.0637	10.6598
B_Pdr1mut_R2:I11A	NNNNKNNINNANNNNSNNFSATSFNLGTLDEFVNNGDLEDLYSILWSDVYPDS				176.147	12.6882	82.9489	10.8404
B_Pdr1mut_R2:I11G	NNNNKNNINNGNNNNSNNFSATSFNLGTLDEFVNNGDLEDLYSILWSDVYPDS				172.572	12.6379	83.3335	10.8517
B_Pdr1mut_R2:I44A	NNNNKNNINNINNNNSNNFSATSFNLGTLDEFVNNGDLEDLYSALWSDVYPDS				155.013	12.3746	79.1362	10.7249
B_Pdr1mut_R2:I44G	NNNNKNNINNINNNNSNNFSATSFNLGTLDEFVNNGDLEDLYSGLWSDVYPDS				113.246	11.6043	76.2909	10.6351
B_Pdr1mut_R2:I8A	NNNNKNNANNINNNNSNNFSATSFNLGTLDEFVNNGDLEDLYSILWSDVYPDS				116.301	11.6696	82.7314	10.834
B_Pdr1mut_R2:K5A	NNNNANNINNINNNNSNNFSATSFNLGTLDEFVNNGDLEDLYSILWSDVYPDS				129.161	11.9269	84.9168	10.8979
B_Pdr1mut_R2:K5G	NNNNGNNINNINNNNSNNFSATSFNLGTLDEFVNNGDLEDLYSILWSDVYPDS				129.058	11.925	85.8898	10.9259
B_Pdr1mut_R2:L26A	NNNNKNNINNINNNNSNNFSATSFNAGTLDEFVNNGDLEDLYSILWSDVYPDS				164.877	12.5259	78.5073	10.7054
B_Pdr1mut_R2:L26G	NNNNKNNINNINNNNSNNFSATSFNGGTLDEFVNNGDLEDLYSILWSDVYPDS				180.393	12.7466	80.3072	10.761
B_Pdr1mut_R2:L29A	NNNNKNNINNINNNNSNNFSATSFNLGTADEFVNNGDLEDLYSILWSDVYPDS				157.484	12.4134	75.6493	10.6144
B_Pdr1mut_R2:L29G	NNNNKNNINNINNNNSNNFSATSFNLGTGDEFVNNGDLEDLYSILWSDVYPDS				118.173	11.7088	75.5612	10.6115
B_Pdr1mut_R2:L38A	NNNNKNNINNINNNNSNNFSATSFNLGTLDEFVNNGDAEDLYSILWSDVYPDS				153.349	12.3481	73.2383	10.5349
B_Pdr1mut_R2:L38G	NNNNKNNINNINNNNSNNFSATSFNLGTLDEFVNNGDGEDLYSILWSDVYPDS				150.503	12.3021	73.9742	10.5594
B_Pdr1mut_R2:L41A	NNNNKNNINNINNNNSNNFSATSFNLGTLDEFVNNGDLEDAYSILWSDVYPDS				118.853	11.7229	76.1005	10.629
B_Pdr1mut_R2:L41G	NNNNKNNINNINNNNSNNFSATSFNLGTLDEFVNNGDLEDGYSILWSDVYPDS				79.4375	10.7343	58.7078	9.99232
B_Pdr1mut_R2:L45A	NNNNKNNINNINNNNSNNFSATSFNLGTLDEFVNNGDLEDLYSIAWSDVYPDS				135.792	12.0498	70.7699	10.4508
B_Pdr1mut_R2:L45G	NNNNKNNINNINNNNSNNFSATSFNLGTLDEFVNNGDLEDLYSIGWSDVYPDS				123.113	11.8093	73.6967	10.5502
B_Pdr1mut_R2:N10A	NNNNKNNINAINNNNSNNFSATSFNLGTLDEFVNNGDLEDLYSILWSDVYPDS				152.751	12.3385	81.2106	10.7884
B_Pdr1mut_R2:N10G	NNNNKNNINGINNNNSNNFSATSFNLGTLDEFVNNGDLEDLYSILWSDVYPDS				120.953	11.7658	82.4297	10.825
B_Pdr1mut_R2:N12A	NNNNKNNINNIANNNSNNFSATSFNLGTLDEFVNNGDLEDLYSILWSDVYPDS				166.865	12.5553	81.9483	10.8106
B_Pdr1mut_R2:N12G	NNNNKNNINNIGNNNSNNFSATSFNLGTLDEFVNNGDLEDLYSILWSDVYPDS				174.28	12.662	83.7691	10.8645
B_Pdr1mut_R2:N13A	NNNNKNNINNINANNSNNFSATSFNLGTLDEFVNNGDLEDLYSILWSDVYPDS				169.404	12.5924	81.4433	10.7955
B_Pdr1mut_R2:N13G	NNNNKNNINNINGNNSNNFSATSFNLGTLDEFVNNGDLEDLYSILWSDVYPDS				152.758	12.3386	82.8177	10.8365
B_Pdr1mut_R2:N14A	NNNNKNNINNINNANSNNFSATSFNLGTLDEFVNNGDLEDLYSILWSDVYPDS				155.988	12.39	82.4033	10.8242
B_Pdr1mut_R2:N14G	NNNNKNNINNINNGNSNNFSATSFNLGTLDEFVNNGDLEDLYSILWSDVYPDS				129.648	11.9362	83.2815	10.8502
B_Pdr1mut_R2:N15A	NNNNKNNINNINNNASNNFSATSFNLGTLDEFVNNGDLEDLYSILWSDVYPDS				167.882	12.5703	82.6609	10.8319
B_Pdr1mut_R2:N15G	NNNNKNNINNINNNGSNNFSATSFNLGTLDEFVNNGDLEDLYSILWSDVYPDS				173.076	12.645	83.1472	10.8463
B_Pdr1mut_R2:N18G	NNNNKNNINNINNNNSNGFSATSFNLGTLDEFVNNGDLEDLYSILWSDVYPDS				150.598	12.3037	82.9225	10.8396
B_Pdr1mut_R2:N1A	ANNNKNNINNINNNNSNNFSATSFNLGTLDEFVNNGDLEDLYSILWSDVYPDS				175.083	12.6733	81.5254	10.7979
B_Pdr1mut_R2:N1G	GNNNKNNINNINNNNSNNFSATSFNLGTLDEFVNNGDLEDLYSILWSDVYPDS				140.925	12.1408	82.9799	10.8413
B_Pdr1mut_R2:N25A	NNNNKNNINNINNNNSNNFSATSFALGTLDEFVNNGDLEDLYSILWSDVYPDS				130.32	11.9488	70.6625	10.4471
B_Pdr1mut_R2:N25G	NNNNKNNINNINNNNSNNFSATSFGLGTLDEFVNNGDLEDLYSILWSDVYPDS				122.419	11.7954	82.4489	10.8256
B_Pdr1mut_R2:N2A	NANNKNNINNINNNNSNNFSATSFNLGTLDEFVNNGDLEDLYSILWSDVYPDS				121.466	11.7762	82.093	10.8149
B_Pdr1mut_R2:N2G	NGNNKNNINNINNNNSNNFSATSFNLGTLDEFVNNGDLEDLYSILWSDVYPDS				131.852	11.9775	82.8887	10.8386
B_Pdr1mut_R2:N34A	NNNNKNNINNINNNNSNNFSATSFNLGTLDEFVANGDLEDLYSILWSDVYPDS				119.26	11.7312	78.5468	10.7066
B_Pdr1mut_R2:N34G	NNNNKNNINNINNNNSNNFSATSFNLGTLDEFVGNGDLEDLYSILWSDVYPDS				148.404	12.2677	81.0981	10.785
B_Pdr1mut_R2:N35A	NNNNKNNINNINNNNSNNFSATSFNLGTLDEFVNAGDLEDLYSILWSDVYPDS				132.675	11.9928	76.9739	10.657
B_Pdr1mut_R2:N35G	NNNNKNNINNINNNNSNNFSATSFNLGTLDEFVNGGDLEDLYSILWSDVYPDS				154.562	12.3674	81.243	10.7894
B_Pdr1mut_R2:N3A	NNANKNNINNINNNNSNNFSATSFNLGTLDEFVNNGDLEDLYSILWSDVYPDS				141.456	12.15	81.7739	10.8054
B_Pdr1mut_R2:N3G	NNGNKNNINNINNNNSNNFSATSFNLGTLDEFVNNGDLEDLYSILWSDVYPDS				107.897	11.4856	82.7561	10.8347
B_Pdr1mut_R2:N4A	NNNAKNNINNINNNNSNNFSATSFNLGTLDEFVNNGDLEDLYSILWSDVYPDS				162.981	12.4976	81.4029	10.7942
B_Pdr1mut_R2:N6A	NNNNKANINNINNNNSNNFSATSFNLGTLDEFVNNGDLEDLYSILWSDVYPDS				157.147	12.4081	81.0167	10.7826
B_Pdr1mut_R2:N6G	NNNNKGNINNINNNNSNNFSATSFNLGTLDEFVNNGDLEDLYSILWSDVYPDS				177.851	12.7118	82.3619	10.823
B_Pdr1mut_R2:N7A	NNNNKNAINNINNNNSNNFSATSFNLGTLDEFVNNGDLEDLYSILWSDVYPDS				165.059	12.5286	80.929	10.7799
B_Pdr1mut_R2:N7G	NNNNKNGINNINNNNSNNFSATSFNLGTLDEFVNNGDLEDLYSILWSDVYPDS				163.634	12.5074	82.3615	10.823
B_Pdr1mut_R2:N9A	NNNNKNNIANINNNNSNNFSATSFNLGTLDEFVNNGDLEDLYSILWSDVYPDS				156.869	12.4038	80.7775	10.7753
B_Pdr1mut_R2:N9G	NNNNKNNIGNINNNNSNNFSATSFNLGTLDEFVNNGDLEDLYSILWSDVYPDS				143.821	12.1907	82.3383	10.8223
B_Pdr1mut_R2:P51A	NNNNKNNINNINNNNSNNFSATSFNLGTLDEFVNNGDLEDLYSILWSDVYADS				135.21	12.0392	77.795	10.683
B_Pdr1mut_R2:P51G	NNNNKNNINNINNNNSNNFSATSFNLGTLDEFVNNGDLEDLYSILWSDVYGDS				142.58	12.1694	84.9184	10.898
B_Pdr1mut_R2:S16A	NNNNKNNINNINNNNANNFSATSFNLGTLDEFVNNGDLEDLYSILWSDVYPDS				141.094	12.1437	82.1022	10.8152
B_Pdr1mut_R2:S16G	NNNNKNNINNINNNNGNNFSATSFNLGTLDEFVNNGDLEDLYSILWSDVYPDS				142.447	12.1672	83.5425	10.8579
B_Pdr1mut_R2:S20A	NNNNKNNINNINNNNSNNFAATSFNLGTLDEFVNNGDLEDLYSILWSDVYPDS				155.858	12.3879	81.9556	10.8108
B_Pdr1mut_R2:S20G	NNNNKNNINNINNNNSNNFGATSFNLGTLDEFVNNGDLEDLYSILWSDVYPDS				147.476	12.2523	86.163	10.9337
B_Pdr1mut_R2:S23A	NNNNKNNINNINNNNSNNFSATAFNLGTLDEFVNNGDLEDLYSILWSDVYPDS				155.14	12.3766	81.4792	10.7965
B_Pdr1mut_R2:S23G	NNNNKNNINNINNNNSNNFSATGFNLGTLDEFVNNGDLEDLYSILWSDVYPDS				129.841	11.9398	88.3521	10.9952
B_Pdr1mut_R2:S43A	NNNNKNNINNINNNNSNNFSATSFNLGTLDEFVNNGDLEDLYAILWSDVYPDS				149.761	12.29	81.3946	10.794
B_Pdr1mut_R2:S43G	NNNNKNNINNINNNNSNNFSATSFNLGTLDEFVNNGDLEDLYGILWSDVYPDS				146.572	12.2372	79.6951	10.7422
B_Pdr1mut_R2:S47A	NNNNKNNINNINNNNSNNFSATSFNLGTLDEFVNNGDLEDLYSILWADVYPDS				164.764	12.5243	79.1559	10.7256
B_Pdr1mut_R2:S47G	NNNNKNNINNINNNNSNNFSATSFNLGTLDEFVNNGDLEDLYSILWGDVYPDS				170.264	12.6048	84.6807	10.8911
B_Pdr1mut_R2:S53A	NNNNKNNINNINNNNSNNFSATSFNLGTLDEFVNNGDLEDLYSILWSDVYPDA				122.244	11.7919	79.3598	10.7319
B_Pdr1mut_R2:S53G	NNNNKNNINNINNNNSNNFSATSFNLGTLDEFVNNGDLEDLYSILWSDVYPDG				154.915	12.373	83.9916	10.871
B_Pdr1mut_R2:T22A	NNNNKNNINNINNNNSNNFSAASFNLGTLDEFVNNGDLEDLYSILWSDVYPDS				158.392	12.4275	82.9066	10.8391
B_Pdr1mut_R2:T22G	NNNNKNNINNINNNNSNNFSAGSFNLGTLDEFVNNGDLEDLYSILWSDVYPDS				162.762	12.4943	85.7019	10.9205
B_Pdr1mut_R2:T28G	NNNNKNNINNINNNNSNNFSATSFNLGGLDEFVNNGDLEDLYSILWSDVYPDS				158.082	12.4227	83.1764	10.8471
B_Pdr1mut_R2:V33A	NNNNKNNINNINNNNSNNFSATSFNLGTLDEFANNGDLEDLYSILWSDVYPDS				178.949	12.7269	81.9348	10.8102
B_Pdr1mut_R2:V33G	NNNNKNNINNINNNNSNNFSATSFNLGTLDEFGNNGDLEDLYSILWSDVYPDS				175.923	12.685	83.9358	10.8694
B_Pdr1mut_R2:V49G	NNNNKNNINNINNNNSNNFSATSFNLGTLDEFVNNGDLEDLYSILWSDGYPDS				123.084	11.8087	85.4413	10.913
B_Pdr1mut_R2:W46A_R4:DelArom-46	NNNNKNNINNINNNNSNNFSATSFNLGTLDEFVNNGDLEDLYSILASDVYPDS				100.617	11.3142	64.9144	10.2389
B_Pdr1mut_R2:W46G	NNNNKNNINNINNNNSNNFSATSFNLGTLDEFVNNGDLEDLYSILGSDVYPDS				114.645	11.6344	69.906	10.4207
B_Pdr1mut_R2:Y42A_R4:DelArom-42	NNNNKNNINNINNNNSNNFSATSFNLGTLDEFVNNGDLEDLASILWSDVYPDS				136.625	12.0648	76.9452	10.6561
B_Pdr1mut_R2:Y42G	NNNNKNNINNINNNNSNNFSATSFNLGTLDEFVNNGDLEDLGSILWSDVYPDS				131.088	11.9633	75.807	10.6195
B_Pdr1mut_R2:Y50A_R4:DelArom-50	NNNNKNNINNINNNNSNNFSATSFNLGTLDEFVNNGDLEDLYSILWSDVAPDS				164.411	12.519	81.8696	10.8083
B_Pdr1mut_R2:Y50G	NNNNKNNINNINNNNSNNFSATSFNLGTLDEFVNNGDLEDLYSILWSDVGPDS				155.67	12.385	85.2266	10.9069
B_Pdr1mut_R3:Scramble1	LNLFSESFSSLNGENNNISNNDSNNFPNTGNLYLDVDNVIDNWDNYNANITKN				38.4613	8.95466	27.5444	8.13553
B_Pdr1mut_R3:Scramble2	SLNDTGIKDENSNPNNTFDYNVNVLNGFNASDNYNDNENLNIFSNLWSLNSNI				23.0049	7.69366	13.9044	6.45829
B_Pdr1mut_R3:Scramble3	NFSNEDNNVNLIINWSNESNANFNNSILLVNGSKLYDNLDTNDDNTFGPSYNN				4.71698	3.80589	8.18167	5.15714
B_Pdr1mut_R3:Scramble4	NWSFEENDLINFSVDTIYLNNNSDANLNSNNNKSNILDTDLPFGGNNNNYNVS				22.7029	7.66124	15.1974	6.67645
B_Pdr1mut_R3:Scramble5	VSASNENDSLSIGSPNTLYDNIFNNLNNNWIEGNFYSNLVNDNLDKNFNNTDN				56.886	9.91497	46.3723	9.4136
B_Pdr1mut_R3:Scramble6	DWNEPDDNNNGTSNVSNVLSNSNLYDGTFDENSLNKNLANSINFFINLYINNN				1.34399	0.725387	2.77833	2.50717
B_Pdr1mut_R3:Scramble7	NIISSNLNLGYNLSDDSVINNNAETSDNLDNTNDYGPLNEVFNNNNNKSFWNF				21.6094	7.54012	4.77441	3.83558
B_Pdr1mut_R3:Scramble8	SLNDILSNNINEDGSSNDNDLYFNVINNNDGNNNSNVNAFNYNWLLFETSKTP				23.446	7.74026	14.7544	6.60388
B_Pdr1mut_R4:DelArom-19-24	NNNNKNNINNINNNNSNNASATSANLGTLDEFVNNGDLEDLYSILWSDVYPDS				152.3	12.3312	71.775	10.4854
B_Pdr1mut_R4:DelArom-19-24-32-42	NNNNKNNINNINNNNSNNASATSANLGTLDEAVNNGDLEDLASILWSDVYPDS				114.164	11.6241	34.2472	8.66992
B_Pdr1mut_R4:DelArom-19-24-32-42-46	NNNNKNNINNINNNNSNNASATSANLGTLDEAVNNGDLEDLASILASDVYPDS				6.78283	4.69709	6.39202	4.55148
B_Pdr1mut_R4:DelArom-19-24-32-42-46-50	NNNNKNNINNINNNNSNNASATSANLGTLDEAVNNGDLEDLASILASDVAPDS				2.41235	2.16061	3.52107	3.08846
B_Pdr1mut_R4:DelArom-19-24-32-46	NNNNKNNINNINNNNSNNASATSANLGTLDEAVNNGDLEDLYSILASDVYPDS				39.7783	9.03726	21.3828	7.51426
B_Pdr1mut_R4:DelArom-19-24-32-46-50	NNNNKNNINNINNNNSNNASATSANLGTLDEAVNNGDLEDLYSILASDVAPDS				16.9781	6.9483	15.1683	6.67175
B_Pdr1mut_R4:DelArom-19-24-42-46	NNNNKNNINNINNNNSNNASATSANLGTLDEFVNNGDLEDLASILASDVYPDS				31.2958	8.44881	24.9888	7.89662
B_Pdr1mut_R4:DelArom-19-24-42-46-50	NNNNKNNINNINNNNSNNASATSANLGTLDEFVNNGDLEDLASILASDVAPDS				12.0879	6.11478	17.1222	6.96905
B_Pdr1mut_R4:DelArom-19-24-46-50	NNNNKNNINNINNNNSNNASATSANLGTLDEFVNNGDLEDLYSILASDVAPDS				44.994	9.33956	39.2925	9.00712
B_Pdr1mut_R4:DelArom-19-32	NNNNKNNINNINNNNSNNASATSFNLGTLDEAVNNGDLEDLYSILWSDVYPDS				149.349	12.2832	59.7535	10.0356
B_Pdr1mut_R4:DelArom-19-32-42-46-50	NNNNKNNINNINNNNSNNASATSFNLGTLDEAVNNGDLEDLASILASDVAPDS				6.38741	4.54972	7.17287	4.83427
B_Pdr1mut_R4:DelArom-19-32-42-50	NNNNKNNINNINNNNSNNASATSFNLGTLDEAVNNGDLEDLASILWSDVAPDS				62.1731	10.133	36.1512	8.80268
B_Pdr1mut_R4:DelArom-19-32-46	NNNNKNNINNINNNNSNNASATSFNLGTLDEAVNNGDLEDLYSILASDVYPDS				62.0833	10.1295	31.5949	8.47214
B_Pdr1mut_R4:DelArom-19-32-46-50	NNNNKNNINNINNNNSNNASATSFNLGTLDEAVNNGDLEDLYSILASDVAPDS				34.0093	8.65283	24.5164	7.8498
B_Pdr1mut_R4:DelArom-19-32-50	NNNNKNNINNINNNNSNNASATSFNLGTLDEAVNNGDLEDLYSILWSDVAPDS				100.372	11.3082	54.6285	9.81562
B_Pdr1mut_R4:DelArom-19-42	NNNNKNNINNINNNNSNNASATSFNLGTLDEFVNNGDLEDLASILWSDVYPDS				153.338	12.3479	70.9375	10.4566
B_Pdr1mut_R4:DelArom-19-42-46	NNNNKNNINNINNNNSNNASATSFNLGTLDEFVNNGDLEDLASILASDVYPDS				48.5307	9.52522	37.001	8.85969
B_Pdr1mut_R4:DelArom-19-42-46-50	NNNNKNNINNINNNNSNNASATSFNLGTLDEFVNNGDLEDLASILASDVAPDS				31.4445	8.46044	28.3785	8.20872
B_Pdr1mut_R4:DelArom-19-46-50	NNNNKNNINNINNNNSNNASATSFNLGTLDEFVNNGDLEDLYSILASDVAPDS				62.7327	10.155	51.6528	9.67819
B_Pdr1mut_R4:DelArom-24-32	NNNNKNNINNINNNNSNNFSATSANLGTLDEAVNNGDLEDLYSILWSDVYPDS				116.539	11.6746	57.8818	9.95755
B_Pdr1mut_R4:DelArom-24-32-42	NNNNKNNINNINNNNSNNFSATSANLGTLDEAVNNGDLEDLASILWSDVYPDS				107.364	11.4734	42.8992	9.22259
B_Pdr1mut_R4:DelArom-24-32-42-46-50	NNNNKNNINNINNNNSNNFSATSANLGTLDEAVNNGDLEDLASILASDVAPDS				3.97603	3.38661	6.3507	4.53557
B_Pdr1mut_R4:DelArom-24-32-46	NNNNKNNINNINNNNSNNFSATSANLGTLDEAVNNGDLEDLYSILASDVYPDS				50.4153	9.6187	29.7247	8.32244
B_Pdr1mut_R4:DelArom-24-32-46-50	NNNNKNNINNINNNNSNNFSATSANLGTLDEAVNNGDLEDLYSILASDVAPDS				24.2018	7.8181	22.6424	7.65469
B_Pdr1mut_R4:DelArom-24-42	NNNNKNNINNINNNNSNNFSATSANLGTLDEFVNNGDLEDLASILWSDVYPDS				134.143	12.0198	69.5724	10.4089
B_Pdr1mut_R4:DelArom-24-42-46	NNNNKNNINNINNNNSNNFSATSANLGTLDEFVNNGDLEDLASILASDVYPDS				41.5454	9.14391	35.1336	8.73262
B_Pdr1mut_R4:DelArom-24-46	NNNNKNNINNINNNNSNNFSATSANLGTLDEFVNNGDLEDLYSILASDVYPDS				64.0908	10.2076	56.5494	9.90041
B_Pdr1mut_R4:DelArom-24-46-50	NNNNKNNINNINNNNSNNFSATSANLGTLDEFVNNGDLEDLYSILASDVAPDS				53.2343	9.75219	49.9171	9.59433
B_Pdr1mut_R4:DelArom-32-42	NNNNKNNINNINNNNSNNFSATSFNLGTLDEAVNNGDLEDLASILWSDVYPDS				133.771	12.013	53.9445	9.7847
B_Pdr1mut_R4:DelArom-32-42-46-50	NNNNKNNINNINNNNSNNFSATSFNLGTLDEAVNNGDLEDLASILASDVAPDS				16.6495	6.90036	12.5854	6.21375
B_Pdr1mut_R4:DelArom-32-42-50	NNNNKNNINNINNNNSNNFSATSFNLGTLDEAVNNGDLEDLASILWSDVAPDS				132.192	11.9838	45.39	9.36106
B_Pdr1mut_R4:DelArom-32-46	NNNNKNNINNINNNNSNNFSATSFNLGTLDEAVNNGDLEDLYSILASDVYPDS				64.086	10.2074	40.6887	9.09279
B_Pdr1mut_R4:DelArom-42-46	NNNNKNNINNINNNNSNNFSATSFNLGTLDEFVNNGDLEDLASILASDVYPDS				68.0931	10.3562	46.132	9.40085
B_Pdr1mut_R4:DelArom-42-50	NNNNKNNINNINNNNSNNFSATSFNLGTLDEFVNNGDLEDLASILWSDVAPDS				130.744	11.9568	71.7701	10.4852
B_Pdr1mut_R5:AddF-22	NNNNKNNINNINNNNSNNFSAFSFNLGTLDEFVNNGDLEDLYSILWSDVYPDS				149.787	12.2904	80.7279	10.7738
B_Pdr1mut_R5:AddF-22-10	NNNNKNNINFINNNNSNNFSAFSFNLGTLDEFVNNGDLEDLYSILWSDVYPDS				139.027	12.1075	69.641	10.4113
B_Pdr1mut_R5:AddF-22-10-49	NNNNKNNINFINNNNSNNFSAFSFNLGTLDEFVNNGDLEDLYSILWSDFYPDS				121.575	11.7784	70.4424	10.4394
B_Pdr1mut_R5:AddF-22-10-49-2	NFNNKNNINFINNNNSNNFSAFSFNLGTLDEFVNNGDLEDLYSILWSDFYPDS				126.949	11.8845	60.4746	10.0651
B_Pdr1mut_R5:AddF-3-14-35	NNFNKNNINNINNFNSNNFSATSFNLGTLDEFVNFGDLEDLYSILWSDVYPDS				154.445	12.3656	60.8495	10.0802
B_Pdr1mut_R5:AddF-3-14-35-20	NNFNKNNINNINNFNSNNFFATSFNLGTLDEFVNFGDLEDLYSILWSDVYPDS				140.737	12.1375	46.0776	9.39795
B_Pdr1mut_R5:AddF-5	NNNNFNNINNINNNNSNNFSATSFNLGTLDEFVNNGDLEDLYSILWSDVYPDS				146.06	12.2286	85.4052	10.912
B_Pdr1mut_R5:AddF-5-53	NNNNFNNINNINNNNSNNFSATSFNLGTLDEFVNNGDLEDLYSILWSDVYPDF				148.957	12.2768	80.5304	10.7678
B_Pdr1mut_R5:AddF-5-53-9	NNNNFNNIFNINNNNSNNFSATSFNLGTLDEFVNNGDLEDLYSILWSDVYPDF				166.342	12.5476	74.0875	10.5632
B_Pdr1mut_R5:AddF-5-53-9-20	NNNNFNNIFNINNNNSNNFFATSFNLGTLDEFVNNGDLEDLYSILWSDVYPDF				121.567	11.7782	60.5304	10.0673
B_Pdr1mut_R5:AddF-53	NNNNKNNINNINNNNSNNFSATSFNLGTLDEFVNNGDLEDLYSILWSDVYPDF				171.249	12.619	80.5575	10.7686
B_Pdr1mut_R5:AddF-53-6	NNNNKFNINNINNNNSNNFSATSFNLGTLDEFVNNGDLEDLYSILWSDVYPDF				145.223	12.2145	74.8781	10.5892
B_Pdr1mut_R5:AddF-53-6-16	NNNNKFNINNINNNNFNNFSATSFNLGTLDEFVNNGDLEDLYSILWSDVYPDF				142.423	12.1667	68.6239	10.3752
B_Pdr1mut_R5:AddF-53-6-16-7	NNNNKFFINNINNNNFNNFSATSFNLGTLDEFVNNGDLEDLYSILWSDVYPDF				162.226	12.4862	55.1886	9.84065
B_Pdr1mut_R5:AddF-6	NNNNKFNINNINNNNSNNFSATSFNLGTLDEFVNNGDLEDLYSILWSDVYPDS				167.401	12.5632	80.3799	10.7632
B_Pdr1mut_R5:AddF-6-1	FNNNKFNINNINNNNSNNFSATSFNLGTLDEFVNNGDLEDLYSILWSDVYPDS				103.152	11.3752	75.8288	10.6202
B_Pdr1mut_R5:AddF-6-1-15	FNNNKFNINNINNNFSNNFSATSFNLGTLDEFVNNGDLEDLYSILWSDVYPDS				170.252	12.6046	69.3792	10.4021
B_Pdr1mut_R5:AddF-6-1-15-7	FNNNKFFINNINNNFSNNFSATSFNLGTLDEFVNNGDLEDLYSILWSDVYPDS				84.4884	10.8855	55.4794	9.85354
B_Pdr1mut_R5:AddL-22	NNNNKNNINNINNNNSNNFSALSFNLGTLDEFVNNGDLEDLYSILWSDVYPDS				145.22	12.2145	77.9054	10.6865
B_Pdr1mut_R5:AddL-22-10	NNNNKNNINLINNNNSNNFSALSFNLGTLDEFVNNGDLEDLYSILWSDVYPDS				151.174	12.313	68.9545	10.387
B_Pdr1mut_R5:AddL-22-10-49	NNNNKNNINLINNNNSNNFSALSFNLGTLDEFVNNGDLEDLYSILWSDLYPDS				170.011	12.6012	73.0523	10.5287
B_Pdr1mut_R5:AddL-22-10-49-2	NLNNKNNINLINNNNSNNFSALSFNLGTLDEFVNNGDLEDLYSILWSDLYPDS				100.49	11.3111	65.8464	10.2739
B_Pdr1mut_R5:AddL-3	NNLNKNNINNINNNNSNNFSATSFNLGTLDEFVNNGDLEDLYSILWSDVYPDS				121.644	11.7798	80.4594	10.7656
B_Pdr1mut_R5:AddL-3-14	NNLNKNNINNINNLNSNNFSATSFNLGTLDEFVNNGDLEDLYSILWSDVYPDS				162.461	12.4897	77.2356	10.6653
B_Pdr1mut_R5:AddL-3-14-35	NNLNKNNINNINNLNSNNFSATSFNLGTLDEFVNLGDLEDLYSILWSDVYPDS				130.293	11.9483	69.7557	10.4154
B_Pdr1mut_R5:AddL-3-14-35-20	NNLNKNNINNINNLNSNNFLATSFNLGTLDEFVNLGDLEDLYSILWSDVYPDS				138.955	12.1063	57.1456	9.92615
B_Pdr1mut_R5:AddL-5	NNNNLNNINNINNNNSNNFSATSFNLGTLDEFVNNGDLEDLYSILWSDVYPDS				162.761	12.4942	84.9959	10.9002
B_Pdr1mut_R5:AddL-5-53	NNNNLNNINNINNNNSNNFSATSFNLGTLDEFVNNGDLEDLYSILWSDVYPDL				165.509	12.5353	78.2031	10.6958
B_Pdr1mut_R5:AddL-5-53-9	NNNNLNNILNINNNNSNNFSATSFNLGTLDEFVNNGDLEDLYSILWSDVYPDL				165.208	12.5309	71.163	10.4644
B_Pdr1mut_R5:AddL-5-53-9-20	NNNNLNNILNINNNNSNNFLATSFNLGTLDEFVNNGDLEDLYSILWSDVYPDL				152.901	12.3409	59.9126	10.0422
B_Pdr1mut_R5:AddL-53	NNNNKNNINNINNNNSNNFSATSFNLGTLDEFVNNGDLEDLYSILWSDVYPDL				142.4	12.1663	77.9877	10.6891
B_Pdr1mut_R5:AddL-53-6	NNNNKLNINNINNNNSNNFSATSFNLGTLDEFVNNGDLEDLYSILWSDVYPDL				141.559	12.1518	72.1927	10.4996
B_Pdr1mut_R5:AddL-53-6-16	NNNNKLNINNINNNNLNNFSATSFNLGTLDEFVNNGDLEDLYSILWSDVYPDL				144.099	12.1954	67.7631	10.3443
B_Pdr1mut_R5:AddL-53-6-16-7	NNNNKLLINNINNNNLNNFSATSFNLGTLDEFVNNGDLEDLYSILWSDVYPDL				114.055	11.6218	55.4223	9.85102
B_Pdr1mut_R5:AddL-6-1	LNNNKLNINNINNNNSNNFSATSFNLGTLDEFVNNGDLEDLYSILWSDVYPDS				152.548	12.3352	75.7205	10.6167
B_Pdr1mut_R5:AddL-6-1-15	LNNNKLNINNINNNLSNNFSATSFNLGTLDEFVNNGDLEDLYSILWSDVYPDS				164.708	12.5234	71.5159	10.4765
B_Pdr1mut_R5:AddL-6-1-15-7	LNNNKLLINNINNNLSNNFSATSFNLGTLDEFVNNGDLEDLYSILWSDVYPDS				110.007	11.5331	59.273	10.0158
B_Pdr1mut_R5:AddW-22	NNNNKNNINNINNNNSNNFSAWSFNLGTLDEFVNNGDLEDLYSILWSDVYPDS				156.095	12.3916	83.067	10.8439
B_Pdr1mut_R5:AddW-22-10	NNNNKNNINWINNNNSNNFSAWSFNLGTLDEFVNNGDLEDLYSILWSDVYPDS				131.798	11.9765	74.7828	10.5861
B_Pdr1mut_R5:AddW-22-10-49	NNNNKNNINWINNNNSNNFSAWSFNLGTLDEFVNNGDLEDLYSILWSDWYPDS				98.3415	11.258	75.0269	10.5941
B_Pdr1mut_R5:AddW-22-10-49-2	NWNNKNNINWINNNNSNNFSAWSFNLGTLDEFVNNGDLEDLYSILWSDWYPDS				83.6781	10.8619	66.5831	10.3012
B_Pdr1mut_R5:AddW-3-14-35	NNWNKNNINNINNWNSNNFSATSFNLGTLDEFVNWGDLEDLYSILWSDVYPDS				113.976	11.6201	67.2818	10.3268
B_Pdr1mut_R5:AddW-3-14-35-20	NNWNKNNINNINNWNSNNFWATSFNLGTLDEFVNWGDLEDLYSILWSDVYPDS				101.95	11.3465	51.7253	9.68163
B_Pdr1mut_R5:AddW-5	NNNNWNNINNINNNNSNNFSATSFNLGTLDEFVNNGDLEDLYSILWSDVYPDS				143.752	12.1895	87.0888	10.9599
B_Pdr1mut_R5:AddW-5-53	NNNNWNNINNINNNNSNNFSATSFNLGTLDEFVNNGDLEDLYSILWSDVYPDW				109.714	11.5265	80.5166	10.7674
B_Pdr1mut_R5:AddW-5-53-9	NNNNWNNIWNINNNNSNNFSATSFNLGTLDEFVNNGDLEDLYSILWSDVYPDW				144.231	12.1977	74.4797	10.5762
B_Pdr1mut_R5:AddW-5-53-9-20	NNNNWNNIWNINNNNSNNFWATSFNLGTLDEFVNNGDLEDLYSILWSDVYPDW				128.548	11.9152	62.2835	10.1374
B_Pdr1mut_R5:AddW-53	NNNNKNNINNINNNNSNNFSATSFNLGTLDEFVNNGDLEDLYSILWSDVYPDW				170.636	12.6102	78.3865	10.7016
B_Pdr1mut_R5:AddW-53-6	NNNNKWNINNINNNNSNNFSATSFNLGTLDEFVNNGDLEDLYSILWSDVYPDW				153.668	12.3532	74.0901	10.5633
B_Pdr1mut_R5:AddW-53-6-16	NNNNKWNINNINNNNWNNFSATSFNLGTLDEFVNNGDLEDLYSILWSDVYPDW				123.661	11.8202	69.9061	10.4207
B_Pdr1mut_R5:AddW-53-6-16-7	NNNNKWWINNINNNNWNNFSATSFNLGTLDEFVNNGDLEDLYSILWSDVYPDW				104.206	11.4002	55.5052	9.85468
B_Pdr1mut_R5:AddW-6	NNNNKWNINNINNNNSNNFSATSFNLGTLDEFVNNGDLEDLYSILWSDVYPDS				161.621	12.477	81.159	10.7869
B_Pdr1mut_R5:AddW-6-1	WNNNKWNINNINNNNSNNFSATSFNLGTLDEFVNNGDLEDLYSILWSDVYPDS				128.465	11.9137	77.3025	10.6674
B_Pdr1mut_R5:AddW-6-1-15	WNNNKWNINNINNNWSNNFSATSFNLGTLDEFVNNGDLEDLYSILWSDVYPDS				97.3695	11.2337	71.9693	10.492
B_Pdr1mut_R5:AddW-6-1-15-7	WNNNKWWINNINNNWSNNFSATSFNLGTLDEFVNNGDLEDLYSILWSDVYPDS				103.265	11.3779	53.7052	9.7738
B_Pdr1mut_R6:DelAcid-30-31-37-39-40-48	NNNNKNNINNINNNNSNNFSATSFNLGTLAAFVNNGALAALYSILWSAVYPDS				1.00339	0.00831129	0.996171	-0.00941334
B_Pdr1mut_R6:DelAcid-30-31-37-39-40-48-52	NNNNKNNINNINNNNSNNFSATSFNLGTLAAFVNNGALAALYSILWSAVYPAS				1.0862	0.20287	0.981332	-0.0462364
B_Pdr1mut_R6:DelAcid-30-31-37-39-40-52	NNNNKNNINNINNNNSNNFSATSFNLGTLAAFVNNGALAALYSILWSDVYPAS				1.27924	0.60423	1.0152	0.0370029
B_Pdr1mut_R6:DelAcid-30-31-37-40-48	NNNNKNNINNINNNNSNNFSATSFNLGTLAAFVNNGALEALYSILWSAVYPDS				1.20588	0.459325	1.08174	0.192781
B_Pdr1mut_R6:DelAcid-30-31-37-48	NNNNKNNINNINNNNSNNFSATSFNLGTLAAFVNNGALEDLYSILWSAVYPDS				1.80202	1.44493	1.89536	1.56884
B_Pdr1mut_R6:DelAcid-30-31-39-40-48	NNNNKNNINNINNNNSNNFSATSFNLGTLAAFVNNGDLAALYSILWSAVYPDS				1.08582	0.202007	1.18226	0.410788
B_Pdr1mut_R6:DelAcid-30-37-39-40-48-52	NNNNKNNINNINNNNSNNFSATSFNLGTLAEFVNNGALAALYSILWSAVYPAS				0.996102	-0.00958369	0.99798	-0.00496171
B_Pdr1mut_R6:DelAcid-30-37-48	NNNNKNNINNINNNNSNNFSATSFNLGTLAEFVNNGALEDLYSILWSAVYPDS				6.18913	4.47234	4.58176	3.73453
B_Pdr1mut_R6:DelAcid-30-40	NNNNKNNINNINNNNSNNFSATSFNLGTLAEFVNNGDLEALYSILWSDVYPDS				62.2261	10.1351	21.6243	7.54181
B_Pdr1mut_R6:DelAcid-30-40-48-52	NNNNKNNINNINNNNSNNFSATSFNLGTLAEFVNNGDLEALYSILWSAVYPAS				1.73629	1.35375	1.43938	0.893618
B_Pdr1mut_R6:DelAcid-30-48	NNNNKNNINNINNNNSNNFSATSFNLGTLAEFVNNGDLEDLYSILWSAVYPDS				31.5456	8.46831	25.4135	7.93796
B_Pdr1mut_R6:DelAcid-31-39-40	NNNNKNNINNINNNNSNNFSATSFNLGTLDAFVNNGDLAALYSILWSDVYPDS				69.8407	10.4184	9.75491	5.58866
B_Pdr1mut_R6:DelAcid-31-39-40-48-52	NNNNKNNINNINNNNSNNFSATSFNLGTLDAFVNNGDLAALYSILWSAVYPAS				1.18544	0.417384	1.18055	0.40724
B_Pdr1mut_R6:DelAcid-31-48	NNNNKNNINNINNNNSNNFSATSFNLGTLDAFVNNGDLEDLYSILWSAVYPDS				52.6734	9.7262	38.8238	8.97767
B_Pdr1mut_R6:DelAcid-39-40-48-52	NNNNKNNINNINNNNSNNFSATSFNLGTLDEFVNNGDLAALYSILWSAVYPAS				2.30887	2.05304	1.54197	1.06254
B_Pdr1mut_R6:DelAcid-39-40-52	NNNNKNNINNINNNNSNNFSATSFNLGTLDEFVNNGDLAALYSILWSDVYPAS				62.9404	10.1631	9.39161	5.49553
B_Pdr1mut_R7:AddAcid-1	DNNNKNNINNINNNNSNNFSATSFNLGTLDEFVNNGDLEDLYSILWSDVYPDS				169.616	12.5955	84.2164	10.8776
B_Pdr1mut_R7:AddAcid-1-16-17-18-21-23	DNNNKNNINNINNNNDDDFSDTDFNLGTLDEFVNNGDLEDLYSILWSDVYPDS				161.088	12.4689	111.339	11.5626
B_Pdr1mut_R7:AddAcid-1-3-6-33-34-35-47-51	DNDNKDNINNINNNNSNNFSATSFNLGTLDEFDDDGDLEDLYSILWDDVYDDS				156.686	12.4009	70.2649	10.4332
B_Pdr1mut_R7:AddAcid-1-3-6-9-25-27-33-35-47-49	DNDNKDNIDNINNNNSNNFSATSFDLDTLDEFDNDGDLEDLYSILWDDDYPDS				149.695	12.2889	70.2857	10.4339
B_Pdr1mut_R7:AddAcid-1-7-12-15-20-27-33-36-47	DNNNKNDINNIDNNDSNNFDATSFNLDTLDEFDNNDDLEDLYSILWDDVYPDS				183.277	12.7855	89.9926	11.0404
B_Pdr1mut_R7:AddAcid-10-12-14-25-27-35-51	NNNNKNNINDIDNDNSNNFSATSFDLDTLDEFVNDGDLEDLYSILWSDVYDDS				164.278	12.517	108.601	11.5015
B_Pdr1mut_R7:AddAcid-12-18-23-49	NNNNKNNINNIDNNNSNDFSATDFNLGTLDEFVNNGDLEDLYSILWSDDYPDS				131.063	11.9628	105.09	11.4209
B_Pdr1mut_R7:AddAcid-12-22-34-35-53	NNNNKNNINNIDNNNSNNFSADSFNLGTLDEFVDDGDLEDLYSILWSDVYPDD				170.776	12.6122	100.156	11.3029
B_Pdr1mut_R7:AddAcid-14-17	NNNNKNNINNINNDNSDNFSATSFNLGTLDEFVNNGDLEDLYSILWSDVYPDS				177.934	12.7129	91.8119	11.0895
B_Pdr1mut_R7:AddAcid-15-17-18-47	NNNNKNNINNINNNDSDDFSATSFNLGTLDEFVNNGDLEDLYSILWDDVYPDS				129.939	11.9417	100.776	11.3181
B_Pdr1mut_R7:AddAcid-18-53	NNNNKNNINNINNNNSNDFSATSFNLGTLDEFVNNGDLEDLYSILWSDVYPDD				175.146	12.6742	94.7402	11.1665
B_Pdr1mut_R7:AddAcid-2-13-16-25-47-53	NDNNKNNINNINDNNDNNFSATSFDLGTLDEFVNNGDLEDLYSILWDDVYPDD				188.909	12.8598	108.061	11.4893
B_Pdr1mut_R7:AddAcid-2-16-28-34-47-49	NDNNKNNINNINNNNDNNFSATSFNLGDLDEFVDNGDLEDLYSILWDDDYPDS				121.813	11.7832	91.6673	11.0856
B_Pdr1mut_R7:AddAcid-2-3-10-13-18	NDDNKNNINDINDNNSNDFSATSFNLGTLDEFVNNGDLEDLYSILWSDVYPDS				126.784	11.8813	97.0614	11.2259
B_Pdr1mut_R7:AddAcid-2-3-9-13-23-47-49-53	NDDNKNNIDNINDNNSNNFSATDFNLGTLDEFVNNGDLEDLYSILWDDDYPDD				148.051	12.2618	101.151	11.3272
B_Pdr1mut_R7:AddAcid-3-10-43	NNDNKNNINDINNNNSNNFSATSFNLGTLDEFVNNGDLEDLYDILWSDVYPDS				161.396	12.4736	90.8866	11.0646
B_Pdr1mut_R7:AddAcid-3-14-16-25-27-28-35-53	NNDNKNNINNINNDNDNNFSATSFDLDDLDEFVNDGDLEDLYSILWSDVYPDD				114.803	11.6378	104.823	11.4147
B_Pdr1mut_R7:AddAcid-3-9-10-14-21-23-25-27-47-49	NNDNKNNIDDINNDNSNNFSDTDFDLDTLDEFVNNGDLEDLYSILWDDDYPDS				159.268	12.441	103.06	11.373
B_Pdr1mut_R7:AddAcid-36	NNNNKNNINNINNNNSNNFSATSFNLGTLDEFVNNDDLEDLYSILWSDVYPDS				172.384	12.6352	89.1799	11.0181
B_Pdr1mut_R7:AddAcid-4-6-15-16-22-33-43	NNNDKDNINNINNNDDNNFSADSFNLGTLDEFDNNGDLEDLYDILWSDVYPDS				151.784	12.3229	97.4243	11.2351
B_Pdr1mut_R7:AddAcid-6	NNNNKDNINNINNNNSNNFSATSFNLGTLDEFVNNGDLEDLYSILWSDVYPDS				177.644	12.7089	84.792	10.8943
B_Pdr1mut_R7:AddAcid-6-10-14-21-23-27-33	NNNNKDNINDINNDNSNNFSDTDFNLDTLDEFDNNGDLEDLYSILWSDVYPDS				148.526	12.2697	100.212	11.3043
B_Pdr1mut_R7:AddAcid-7-51	NNNNKNDINNINNNNSNNFSATSFNLGTLDEFVNNGDLEDLYSILWSDVYDDS				161.307	12.4722	87.2757	10.9652
B_Pdr1mut_WT3	NNNNKNNINNINNNNSNNFSATSFNLGTLDEFVNNGDLEDLYSILWSDVYPDS				175.138	12.6741	82.9123	10.8393
B_Pdr1mut_WT5	NNNNKNNINNINNNNSNNFSATSFNLGTLDEFVNNGDLEDLYSILWSDVYPDS				147.28	12.249	82.9123	10.8393
B_Pdr1mut_WT6	NNNNKNNINNINNNNSNNFSATSFNLGTLDEFVNNGDLEDLYSILWSDVYPDS				156.919	12.4046	82.9123	10.8393
B_Pdr1mut_WT7	NNNNKNNINNINNNNSNNFSATSFNLGTLDEFVNNGDLEDLYSILWSDVYPDS				161.974	12.4824	82.9123	10.8393
B_Pdr1mut_WT8	NNNNKNNINNINNNNSNNFSATSFNLGTLDEFVNNGDLEDLYSILWSDVYPDS				151.473	12.3179	82.9123	10.8393
B_Pho4mut_R3:Scramble1	NEDAWNPEMGMLAATDHDDMNRILVTGTFMKQSALSAPSSPEENRHDSEEDLH				1.8642	1.52816	1.4822	0.965544
B_Pho4mut_R3:Scramble2	WALNDDHDHRNKRSNDSANMEDPDMESMTVMTLHALGAFELSGEEPIQPTEAS				1.33785	0.714138	3.0551	2.74017
B_Pho4mut_R3:Scramble3	HALMELDHEFSDKLNADTMTTIANEMQVMDRASHEPPDDEWNESGGRNSLPAS				1.78902	1.42716	1.93999	1.62593
B_Pho4mut_R3:Scramble4	PEAHMNLHEHQDDGRSSSPALSAEPMDTDWLVDNEIMAFLNRGKATEEMSNDT				35.2343	8.73964	13.6934	6.42077
B_Pho4mut_R3:Scramble5	LMEDTRTDSEESAGREASDADAVLHFEHMLSLNDDPNNKTQENMGSAPHWIPM				1.23024	0.508404	1.71752	1.32709
B_Pho4mut_R3:Scramble6	VSEDEHSDPMQNSRNSFDLAGNHTTEMAPHLPGDATADLWREMEKLSENDIMA				9.19287	5.44306	2.62475	2.36765
B_Pho4mut_R3:Scramble7	SRSVSNRTLHQLGAWSAEATENFEDDEPSPNGDMAMKEIMPHDDDHLALMNET				1.38583	0.800604	1.35104	0.738208
B_Pho4mut_R3:Scramble8	TQLNNPMSHDEELFLADTNEPWRAMSANDDRDSSLGGHMAKVTEDASEIHPME				1.71454	1.32282	1.80616	1.45056
B_Rap1mut_R3:Scramble1	NSLLAESEAEPDDAEDLSHFIDSEMYFSDSILINNYPIINSNKSRPLEETNFI				20.1547	7.36913	14.7685	6.60621
B_Rap1mut_R3:Scramble2	FITESNNPESDADNHFLAEISSLPNIDYEKPIAMFRDLISSLDLYSINSENEE				4.30385	3.581	9.07531	5.41148
B_Rap1mut_R3:Scramble3	FSSNSPLFDISKHDTELLYLAFLDPIDIEIMDAPYNSNNISEANEISNEREES				19.8461	7.33126	16.5332	6.88315
B_Rap1mut_R3:Scramble4	KTSENDLSNIFELDAHFNININRSPANESSSEAIPEMIFLPSLSDILYEDDEY				109.591	11.5238	31.8692	8.49335
B_Rap1mut_R3:Scramble5	NPFNSEDFLIESLDPILAPELANSDYSSIDENIEHMFKNYEAEDRSNSSTLII				19.4177	7.27772	31.3793	8.45535
B_Rap1mut_R3:Scramble6	SDNSEDEEIEEMSRAFLADYHIDLNSEIPSFPFLEALSSIINNNNPKLTISYD				1.35875	0.752186	4.43389	3.65404
B_Rap1mut_R3:Scramble7	NFPIESLTFYPHEASNNNIEDLEISILLEFPINDMASLIDSEKNRSSSDEADY				4.23415	3.54094	22.3053	7.61789
B_Rap1mut_R3:Scramble8	SISHANNTNPEFSLNAENYPEDISLSIKINIEMLISDYERSLEDPSDFDEFLA				2.1361	1.86221	18.8567	7.2058
B_War1mut_R3:Scramble1	PIIISSFFNKVAYSVLLNDTNDSDDLWDEVNMNNTDSDTNSGLDPWANTNSSL				1.75928	1.38603	2.78817	2.51585
B_War1mut_R3:Scramble2	DNNSSYKVDNFPLATVLTDMSNDPLSNIFDGLDELWTSISNSDSDTNWINAVN				69.4759	10.4055	70.9259	10.4562
B_War1mut_R3:Scramble3	YIWNTNDIDNGNVLDLDSMLSWSNVNFFVADTNDESTSSDSNTAIPLNLPDSK				33.465	8.61323	25.8904	7.98358
B_War1mut_R3:Scramble4	SNDLFLLTSVPGFINNSDSNNIWNVENYNTILMDASDTTDDDSPDSVNASKLW				21.475	7.5248	10.6512	5.80432
B_War1mut_R3:Scramble5	ANLNMIWSSNDSVTNNDISNDSNTSVNWLNTDVIAGSDFFDYDLKEDLPLPTS				47.0124	9.44723	38.1095	8.93211
B_War1mut_R3:Scramble6	NDLDWFNSMDNSNWLIDAGIAFVNNSTNTLLDLTPESVKSNDNYSTSVDPISD				44.4425	9.3093	29.8977	8.33667
B_War1mut_R3:Scramble7	SESDDNDTNTLLFGYDIDMSNNDDVVNFSSWASSLPNNNILSNDVWLTPKITA				3.64058	3.17035	22.549	7.64454
B_War1mut_R3:Scramble8	WNWSEISSDTDAKLLAPSNPSFLNTNSVINVDIFSMNNYDDNTDDLTDNVLSG				25.7157	7.96697	8.43055	5.23066
B_homologs_PDR1-A0A010R5C4	GAFDDIDTQLLGQSPAYYLQGQGQQQQQQQQHSHHQSSYDLSSMYQQHSGYSG				5.40543	4.14015	4.3455	3.60463
B_homologs_PDR1-A0A017SCP8	QPNQSRLQSPISRMSPSGEVVNSPDLVSIPNQNFLWQGYNFQPQNWTGDQHAQ				2.00259	1.70385	3.52072	3.08822
B_homologs_PDR1-A0A061B6R5	FLPSYMLQKPSANQLPDFITSSESPEDPLTTTKTDEEFDWDRFIDKGDLNFDI				67.3923	10.3308	25.8449	7.97927
B_homologs_PDR1-A0A066XNV0	FVMSGAFDDIDTQLLGQSPAYFLQGQGHQQQHQSGYELSSIYQHSGYQGMPDA				6.66228	4.65309	7.94991	5.08663
B_homologs_PDR1-A0A072PNK4	GGDTMTATNYTDLMGDPPIDFNDMPATGLSDYSGWGQFASMVSSGLGNLDAFL				4.52594	3.70445	34.5356	8.6905
B_homologs_PDR1-A0A074WQR9	DNLEAQFYPLPPYMMQQPQQQQQQQQQQQQQQQSRWDMGMMQQQQQMANMRQV				1.43565	0.887257	2.9261	2.63432
B_homologs_PDR1-A0A074WV56	GQSTGSETDNLEAQFYPLPPYMMQQQQQRQQQQGRWDMNMMQQQQQQAQLANM				1.94128	1.62757	2.23078	1.96862
B_homologs_PDR1-A0A074YJJ1	APETDNLEAQFYALPPYMMQQQQQQRQQQQQQQGRWDMDMMQQQQQQQQQQQQ				2.51028	2.25825	7.23353	4.85494
B_homologs_PDR1-A0A077WP31	PGDGYPMNKMYQHHQQPRMTRQLRRQSSMTAMMPSYYAQRHQQQQQYLPPRNR				1.19562	0.438363	0.967732	-0.0804781
B_homologs_PDR1-A0A084APV6	PGPMDDIETQFFGQPPPYMMGNQHPQGQSFMNFQEPMFDAGSLAAMHAQPQVH				11.6219	6.01832	7.47932	4.93692
B_homologs_PDR1-A0A084QNC6	PGPMDDIETQFFGQPPPYMMGNQQPQGQSFMNFQEPMFDAGSLAAMHAQPQVH				15.3977	6.70858	6.9	4.73911
B_homologs_PDR1-A0A086SZB5	FMPTSMGEMDNQLLGQPPPYMIQHPEGQPGLEFSTMYDPNLYNVPMGQHPPST				7.27992	4.87062	6.04819	4.41582
B_homologs_PDR1-A0A0B4HZ20	ASFFFTGSFEEMGDQILGQPPPYMTPQQQHHPMGMAASMYDPHNMMVLHSTQQ				1.34759	0.731934	3.95674	3.37468
B_homologs_PDR1-A0A0C9MH29	IAIVPPHSSVPMLDTNTNVTSTPRNLHVMAVRNNRFSAPVMSNNTQNPYMIPI				1.01106	0.0269976	1.03385	0.08167
B_homologs_PDR1-A0A0D1YLU8	SQSGHFGAPITDILMQNAIGGEHMNLGGIPNFRDSITATPTTDPSQSTQPDDF				1.25761	0.56239	2.67904	2.41789
B_homologs_PDR1-A0A0D1YZZ3	GHGPPYNAPITDVLMQNAIGGDHIDLSGMPMPMGSNNASAESTGTSRGPAHGF				1.62946	1.19795	2.78912	2.51669
B_homologs_PDR1-A0A0D1Z2F7	GPGGQFGTPLTDVLMQNAIGTEAGHFGVWQGQGHGHGQGQGQGQVQGHVPMGM				1.04165	0.100123	1.59223	1.14124
B_homologs_PDR1-A0A0D2CH87	AHGRHFGAPITDLLMQNAIGGEHMNLSGLPHFHDPLTTAGNDVPGSSRHDEFW				1.87345	1.5403	4.57447	3.73062
B_homologs_PDR1-A0A0D2EB54	SQGGRFGAPITDLLMQNAIGGEHVNLGGLPSFHDPMVATSTTDPSRSTQPEDF				1.02183	0.0529889	2.06541	1.77964
B_homologs_PDR1-A0A0D2FZM3	AQGNRDFNAPFTDLLMQNAIGHDLHHLGGIPRTTEPVTMSDLSTTANADAFWK				6.94237	4.75413	4.84778	3.873
B_homologs_PDR1-A0A0D2GDE0	SQTSRDFNAPFTDILMQNALGTDMSHLGGVPNTTESMNMGGGDVSASTNPDEY				3.57426	3.12525	9.64498	5.56085
B_homologs_PDR1-A0A0D2GE79	QTGRDYNTPFTDILMHNSLGSDMNHLGGGVPNTTESMNVGGEASASTNADEYW				5.47538	4.1717	3.98813	3.39407
B_homologs_PDR1-A0A0D2I869	AHDGTFSAPLTDIVMPKAIGSSPLHLNGMQHVHEAMAMQDIIGGPNPEEYWGA				9.79513	5.59875	3.55456	3.11169
B_homologs_PDR1-A0A0D2KTV2	TQTGRDFNAPFTDILMHNALGTDMNHLGGVPNTTESMNLGGDASASTNPEEYW				9.9675	5.64155	8.61886	5.28486
B_homologs_PDR1-A0A0D9P061	ASFFFTGSFEEMGDQILGQPPPYITPQQQHHPMGMAASMYDPHNMMALHSTQQ				1.35082	0.73782	4.59146	3.73972
B_homologs_PDR1-A0A0E1RWS6	PARHERRLSESAPDASAPGYVENPDLVTMPGQAFLWQNLGTQGPGSNFFPHSA				1.65645	1.23826	2.64175	2.38349
B_homologs_PDR1-A0A0F0IBB6	SQSRLQSPVSHASTPTSGEAVNSPDLVSLPNNNFMWQGYNFQPQNFPTEQSTQ				2.15893	1.88829	3.03411	2.72325
B_homologs_PDR1-A0A0I9XUU1	TGTFDDVESQIFGQPPPYMMHQQGQPMMSAPSHQPMFASPSAIMGMQPGQPMM				1.53841	1.05687	2.94647	2.65134
B_homologs_PDR1-A0A0L0NCN3	SFFFAGPLDDVGDQLLGQPPPYMVQHQAQQHIGLGGSHFDAHNMMAMHAAAPP				1.10784	0.251276	4.07138	3.44476
B_homologs_PDR1-A0A0L1J1V6	SQSRLQSPVSHASTPTSGEAVNSPDLVSLPNNNFMWQGYNFQPPNLTTEQSTQ				1.5898	1.1375	3.14438	2.81084
B_homologs_PDR1-A0A0L8RJ58	NNNNNNNNTNNNNNNNTNFPPTSFNLGTLDEFVNNGDLEDLYSILWSDVYPDT				140.775	12.1382	83.3919	10.8535
B_homologs_PDR1-A0A0L8VR94	NKNNKNNINNINNNNSNNFSATSFNLGTLDEFVNNGDLEDLYSILWSDVYPDS				169.585	12.595	81.095	10.7849
B_homologs_PDR1-A0A0N1HF53	AHQLAQQQQQQRHQQQRHFNQVSTPMSATGFGHDGGPQHQPQQHNMFDVPQES				1.00677	0.0165612	1.08832	0.207664
B_homologs_PDR1-A0A0P1KRU9	GNERASGGATKQGSFAPPSPIMNFNLGSLDDFLNYGEDDLYNKLWSDINTEFP				98.4243	11.2601	79.072	10.723
B_homologs_PDR1-A0A0P7BBB0	TGTFDDVESQIFGNPPPYMMHQQNQPMMNIASQMFDPGMMAMPSSSGHPMAPQ				5.31485	4.09869	8.35723	5.20923
B_homologs_PDR1-A0A0S6XE45	DGLQAQLYGFPPFVMQGNQWSAEPQAMRSHAVNSTGPLQSQPYIAAQMAEWPN				2.7691	2.49901	1.89669	1.57055
B_homologs_PDR1-A0A0V1PZE7	DQLDAQIFGRILPPYMLEKNAKQVNTNTSNNDFNLENVDNFEPQMNVDNFDFS				20.5098	7.41198	19.9126	7.33948
B_homologs_PDR1-A0A135TXY6	FMMPGAFDDIDTQLLGQSPAYYLQGQSQQQQHSHHQSSYDLSSMYQQHSGYSG				16.42	6.8663	11.9452	6.08565
B_homologs_PDR1-A0A135V4I6	MPGAFDDIDTQLLGQSPAYYLQGQSHQQQQQHSHHQSSYDLSSMYQQHSGYSG				9.01258	5.39446	5.16167	4.02694
B_homologs_PDR1-A0A136JKS9	NPSQYYVPNLYDSIEGQLMGPLPPYMMQAAAQPAYDFATQMYADPMLPVQQMH				4.44629	3.66089	1.61745	1.1798
B_homologs_PDR1-A0A139HY48	DENIEAQFFTLPPYIEQRQQQPQQSHAQMAQRGMGYPQHMAYSNGQPNSSAPA				2.87102	2.5877	1.59714	1.14879
B_homologs_PDR1-A0A139IJ47	DENIEAQFFTLPPYIEQRQQQPQQSHPQMVQRGMEYPQHVAYSNGQPNSSAPA				3.41286	3.01187	1.73944	1.3582
B_homologs_PDR1-A0A151GXJ3	DATFFFGASMDEMGNQLLSQPPPYMMQHQHLTMAGNPFDASNLLAIHAAQQQQ				1.52245	1.03129	4.62686	3.75856
B_homologs_PDR1-A0A161V4Q7	FMMPGAFDDIDTQLLGQSPAYFLQGQSHQHQHQHQQPGYDLSSVYQHSGYQGT				7.52873	4.95308	9.17559	5.43844
B_homologs_PDR1-A0A165HZW0	DNLEVPLFGPLPPYPYLVPDQHLDTALATQPDSGNVMMPVMDDPQEAQGRPAI				8.86395	5.35366	10.1283	5.68082
B_homologs_PDR1-A0A166ZZ55	ASFFFTGSFEEMGDQILGQPPPYMTPQQQPHVIGMAGSMYDPHNFMALHSTQQ				1.36439	0.76234	3.71761	3.22173
B_homologs_PDR1-A0A168A1I4	LRFYTPNVYGGDIEGQLLGPVPAYLMQPSDTLGGLDLASEMYNASSLLTLQQA				1.22539	0.498714	1.42223	0.864203
B_homologs_PDR1-A0A168AG64	SFFFTGSFEEMGDQILGQPPPYITQQQQQQQHMSLAGAMYDPQNLMALHVAQQ				1.30355	0.650427	3.42121	3.01787
B_homologs_PDR1-A0A175W3J6	GIEGQLLEPIPSYLMQQGQGQGQGQGQGQGQHHGLDPTGQLYNTPNMLAMQPE				1.33949	0.717153	1.8604	1.52315
B_homologs_PDR1-A0A177CHN8	TGRPDNEVQLLGPMPMYLMQGAQHRSFHPQPGVHGPPPPQIPGQNPANMSFDE				1.01391	0.033902	1.20955	0.466795
B_homologs_PDR1-A0A177DUA3	RHMESEAQIFTSMPMYMMQGAQQYRGYPPQHGMPMQASNNMPFDELMHQEDWS				7.10402	4.81061	10.0216	5.65482
B_homologs_PDR1-A0A178A949	THPRREGEIYGQMPMYLMQGGQGQRGFQPHNGSPNVHLPSNNLQFDELMNQDE				1.12822	0.296008	1.83986	1.49591
B_homologs_PDR1-A0A178FU87	PGNTQSPTSEPQQNTNAYQFMGNPDLVTIPGHSFIWQNLAAQGAPSNSYQYPT				1.15545	0.354509	2.38006	2.12755
B_homologs_PDR1-A0A178ZE24	PQTGRDFNAPFTDILMHNALGTDMNHLGGVPNTTESMNMGGDAGASTNPDEYW				14.5425	6.56837	8.78438	5.33153
B_homologs_PDR1-A0A179FA29	ASFFFTGSFEEMGDQILGQPPPYMTPQQQPQHMGMAGTMYDPQSMMALHSAQQ				3.06478	2.74793	5.33614	4.1085
B_homologs_PDR1-A0A179H2G4	GALDDVGEQLLGQPPPYMMQQQQQQQQQQQQQHQMGLAGNAFNPHAMLAMHAP				1.35446	0.74441	1.34921	0.734895
B_homologs_PDR1-A0A194VIT5	SRNFYMPSMYGDIEGHLMGSIPSYLMQPTAGQNGLDLSSQMYHSSSSSSALHH				2.49867	2.24687	1.88252	1.55215
B_homologs_PDR1-A0A1A7MUC3	TEADNLEAQFYALPPYMMQQQQQQRQQQQQQQQSRWEMGMMQQQQQQQQQQQA				1.77812	1.41217	2.20517	1.94029
B_homologs_PDR1-A0A1B2JCY9	LPPYMLNSNKVEQGQNDRNQSVQPSSSNTPDGSQPVTVLDGLYPLQNDNNNNQ				1.22032	0.488535	1.13094	0.301911
B_homologs_PDR1-A0A1B7NWR4	LSTSGHPMTGASSSTSPGGFIQSPDLISISDEAFFWQDLDSQQLSQQQKQQNQ				25.9118	7.98561	16.4653	6.87305
B_homologs_PDR1-A0A1B7SQQ1	IFGRFLPPYMLNSNQQSTDNTPEPEPYPEQYQEPENEPQNGTIFGSIPSGLST				1.33503	0.708958	1.52595	1.03692
B_homologs_PDR1-A0A1B8B785	TGTFDDVESQIFGQPPPYMMHQQGQGMMGVSPQPMYANPANLMAMQPNQPPVM				1.22936	0.506636	2.09552	1.81515
B_homologs_PDR1-A0A1B8C381	PSAGMYGDLEGQIFGPLPGFLMEGGMGGMGMGMGMNGFGGDGMGGTAGEGVVQ				28.3277	8.20432	13.2061	6.33186
B_homologs_PDR1-A0A1B8DMQ4	QSGGMYGDLEGQIFGPLPGFLMEGGMGGMGMGMGMNGFGSDGMGGVSGGEGVV				16.3411	6.85448	13.6873	6.41967
B_homologs_PDR1-A0A1B8F3A3	PSSGMYGDLEGQIFGPLPGFLMEGGMGGMGMGMGMNGFGGDGMGGTAGEGVVQ				24.3206	7.83012	17.6664	7.04581
B_homologs_PDR1-A0A1B8FS80	PSSGMYGDLEGQIFGPLPGFLMEGGMGGMGMGMGMNGFGGDGMGGMAGEGVVQ				22.4157	7.63	14.2171	6.51284
B_homologs_PDR1-A0A1B9I6S2	NNNNSYSGNDFSSAGIPGMTNSGGLGEPSAPYDRFETLTPITGNIMLTGTSYD				2.99389	2.69051	3.76628	3.25364
B_homologs_PDR1-A0A1C7N9B2	TNATPPDLSHVVTSPSSIVLDMPRNLHAMAVRNNQFSTSVMSNNNNTQHTYMI				0.979631	-0.050493	1.11066	0.257523
B_homologs_PDR1-A0A1D9Q6T6	YDDLEGQIFGPIPAYMIHNQQGFELSGGGQGGSGNRMGGLIQGGNANATGTAG				5.04883	3.97271	2.75194	2.48375
B_homologs_PDR1-A0A1E3BEG9	QPNQSRLQSPISRMSPSGEVVNSPDLVSIPNQNFMWQGYNFQPQNWTGDQQTQ				2.3895	2.13726	4.47775	3.67819
B_homologs_PDR1-A0A1E3PD56	LDMQIFGRFLPPYMLKRPDGTNGPGAKGGDLPSGLNTTNNPTKLEDLPNLNET				1.01027	0.0250717	1.17998	0.40606
B_homologs_PDR1-A0A1E3Q0J4	NNVQPDSAMLRSEHLDVGIVLDGDPNVSIQHLISWENFDNLVMDLVGNGPFDE				57.7371	9.95141	35.2799	8.74282
B_homologs_PDR1-A0A1E3QMP1	GRFLPPYMLPYKDEGPGQLGSQMPSGLATTSNNINNVWPDSPSGEALSDPNFT				1.99592	1.69567	2.0676	1.78224
B_homologs_PDR1-A0A1E4RGK2	RILPPYMLEKSAKRAEGADAASNGYSSKNDSKPSQNNDYRSKFDDNTTNNNRS				1.0715	0.169448	0.945059	-0.138647
B_homologs_PDR1-A0A1E4RV31	PGYLLETPGKLDNLEMMAHSGNYENSPLGTVSTASKNDEREFDWERFIDKDDV				29.5965	8.31183	4.73679	3.81617
B_homologs_PDR1-A0A1E4SIS6	QIFGRILPPYMLEKNAKSSTVSLLGFFNEDQELKQMDQTVTHPNIQVDPMNLN				1.34119	0.720256	1.46393	0.935116
B_homologs_PDR1-A0A1E4T2G8	LPPYMLNSNTQQLAELSPETMGPPSSHQRLSQQQLQQQQLQQQQSQQQQQQQQ				1.0091	0.0222221	1.02959	0.0715378
B_homologs_PDR1-A0A1E5RE56	ASGINGTPSQTFSAGNNKVSIENINFGSLEEFINDANGWFHAWGDVGPEFNFS				92.0085	11.0947	38.4362	8.95305
B_homologs_PDR1-A0A1G4J4A0	NATNPAEAAKAKEAVPPMSPLINFNLGSLDDFLNYGEDDLYNKLWSDINIGIP				37.7673	8.90998	55.9051	9.87229
B_homologs_PDR1-A0A1G4JBJ1	LNDFKPPTLDGIHPLESSPKAEAFFLGSLDEFMSRQEDDVYNKLWSDIKTSFP				31.4567	8.46139	34.1346	8.66184
B_homologs_PDR1-A0A1G4JPV9	SGNIPAEKSKTKEATLPLSPPINFNLGSLDDFLNFGEDDLYNKLWSDINIDIL				53.7707	9.77679	64.6664	10.2295
B_homologs_PDR1-A0A1G4JSD4	TKTKLADDLQAKESALPMSPSLNFNLTSLDDFLNCGEDDLYNKLWSDINIGIP				40.9398	9.10788	51.663	9.67868
B_homologs_PDR1-A0A1G4K917	KEDNQEFGQKVKESTFPMSPPINFNLGSLDDFLNYGGDDLYNKLWGDINIDVP				109.786	11.5282	72.7499	10.5185
B_homologs_PDR1-A0A1G4MB60	NITNVVENAFGNDSSIPMSPLTNFNLGSLDDFLNYGEDDLYNKLWGDIHTTTL				55.0269	9.83345	41.9089	9.16529
B_homologs_PDR1-A0A1J7J322	MQFYMPNMYDDIEGQLLGPLPPYLAQHHGQTHHGMDINSQVYNAASMLSMPPV				1.36257	0.759064	2.36085	2.10766
B_homologs_PDR1-A0A1L9PFL8	RLSNSQMQSPVSHGSTPGEAVNSPDLVSIPNQNFIWQGYGSGIDQQQNFVPDA				1.81956	1.4687	4.44951	3.66266
B_homologs_PDR1-A0A1L9RWK9	GRSSRLQSPVSHSTTPGSEAVNSPDLVSIPNQNFLFQGYNFPAQNQNQNMSVD				1.44666	0.905998	1.96485	1.65718
B_homologs_PDR1-A0A1L9TNC2	RLSNSQMHSPVSHGSTPGEAVNSPDLVSIPNQNFVWQGYGSGMDQQQNFVPDA				1.5304	1.04406	4.88212	3.89032
B_homologs_PDR1-A0A1L9UWR1	ASQIQSPASHASTPINSAEAVNSPDLVSLPNQNFLWQGYNFQPQNFTAESTVP				2.07735	1.79379	2.36695	2.11399
B_homologs_PDR1-A0A1L9X9Q6	SRLQSPVSHGTSTPVNGAEAVNSPDLVSLPNQNFIWQGYNFQPPSNFPTEMMT				1.53004	1.04349	2.40106	2.1491
B_homologs_PDR1-A0A1Q5Q8A3	LGLETQLYSPATQSSSTPDTLQSPDLVSLPHNYVWQSFGPSTQNTAREQLMKE				1.52257	1.03147	1.90559	1.58204
B_homologs_PDR1-A0A1Q8RN65	GAFDDIDTQLLGQSPAYFLQGQGQQQQQHNQSAQQQQQSHHQPGFDLSSMYQH				10.7634	5.83004	3.47485	3.05604
B_homologs_PDR1-A0A1R3RZG3	TSRLQSPGSHASTPGTNGEVVNSPDLVSLPNQNFMWQGYNFQPNFTAEAAVPA				1.29299	0.630467	2.41743	2.16577
B_homologs_PDR1-A0A1S1VLT9	GAFDDIDTQLLGQSPAYFLQGQGQQQQQQHQQQHQQPGYDLSGIYQHSGYQGM				5.93956	4.37136	4.22919	3.53807
B_homologs_PDR1-A0A1S7HW54	QDPNLRQEKPTHVPSISNEDSNKFNLGTLDEFVHKGDLNDLYSTLWSDLYSDE				86.9481	10.9559	58.8881	9.99984
B_homologs_PDR1-A0A1S8BHZ4	AVDVELHNPSPFIFAAGTQFGMNPNAMHAAHPHARQMFGAGTGMQDGMAATSG				1.45974	0.928089	1.71066	1.31727
B_homologs_PDR1-A0A1V6SBB4	SRTSSRIHSPISQSQTPSESISSPDLVSIPNQNFVWQGYNFQPHDPNNMTTES				2.02669	1.73321	2.71321	2.44898
B_homologs_PDR1-A0A1V6SPP6	SRTSSRVHSPISQSQTPTEAISSPDLVSIPNQNFVWQGYNFQPNNPNDMATES				1.78311	1.41904	2.67222	2.41163
B_homologs_PDR1-A0A1V8TZE7	DNMEAQFFALPPYLEQGRSQQRQQQQQSATSFPQNNRQFNNYGHIQQPGMQQI				1.32197	0.684846	1.45002	0.911689
B_homologs_PDR1-A0A1W2TNQ5	DPSSYYVPHLYDGIEGQLLGPLPPYLMQPQGGPGIPFSAQMYSDPMLPSQQMH				5.35878	4.11889	2.67051	2.41006
B_homologs_PDR1-A0A1Y1ZR93	NDNDVQLFGPMPMYLMQNAQLAAQRGFQAQPSPHNLHIRPESGNVAFEDLFGG				15.6421	6.74722	2.78384	2.51203
B_homologs_PDR1-A0A1Y2AJJ8	GKSNPNPSKIPNNITNDESTGKLRQDKKEDQMDWRNDNNNNNNKDSVIEFKKE				0.875415	-0.326465	0.942231	-0.146
B_homologs_PDR1-A0A1Y2EEQ9	DTQQFYMPNYFDGIEGQLMGPLPPFLMQNPGQSGFDFPAQIYSDPVLSLHMQQ				3.91291	3.34735	3.28697	2.91966
B_homologs_PDR1-A0A1Y2MF57	RRHDSEAQLFGPMPMYLMQAAQAQRGSALHSGGPSMHHIPGQNMQFDDLLNQD				2.40793	2.15612	2.68798	2.42606
B_homologs_PDR1-A0A1Y2TM76	DPSQFYIPNFYEGIEGQLMGPLPPYLMQSQAQPGFNFPAQMYSDPMLQQMHTL				1.24807	0.543711	2.40517	2.1533
B_homologs_PDR1-A0A1Y2X7J9	GPAPFYVPNFYDGIEGQLMGPLPPYLMQSQAQPGFNFPAQMYSDPMLLQMHTL				1.13783	0.316817	1.36705	0.767114
B_homologs_PDR1-A0A229Y929	QARLQSPGSHSSTPGSGTEAVNSPDLVSIPNQNFMWQGYNFQPQAIPPESSGP				1.43591	0.887703	2.56122	2.30753
B_homologs_PDR1-A0A232LYJ1	SPVQKQSPSSHCSTPGGGETVNSPDLVSIPSQNFMWPIGMPGQQPPLQPPSDP				1.35883	0.752324	2.15712	1.88623
B_homologs_PDR1-A0A2H4SKV9	FPGTLEEIGNSFVSQPPPYMTPQNGRQSIGGMNMGNMYDSNGIMAMQHPGAAQ				1.88066	1.54973	2.39288	2.14073
B_homologs_PDR1-A0A2P2SWB6	PSQGMYGDLEGQIFGPLPGFLMEGGMGGMGMGMGMNGFGGDGMGGTAGEGVVQ				16.2429	6.83969	17.9379	7.08323
B_homologs_PDR1-A0A2P4Z907	SMEDMGDQFMGQPPPYMMPQQQQQQQPQQHNAMGMNMPGNMYDPNVMMGMHQQ				2.75651	2.48783	2.80609	2.53156
B_homologs_PDR1-A1CKU7	QSRLQSPVSHGSTPGSGAEAVNSPDLVSIPNQNFMWQGYNFQPQGFEADGSAQ				1.93666	1.62172	3.87346	3.32249
B_homologs_PDR1-A1D6M3	QARLQSPVSHSSTPGSGTEAVNSPDLVSIPNQNFMWQGYNFQPQAIPPDSSGP				1.29289	0.630264	3.02955	2.71956
B_homologs_PDR1-A2QDP8	ASQLQSPASHASTPINSGEAVNSPDLVSLPNQNFLWQGYNFQPQNFTAETTVP				1.59661	1.14799	2.42998	2.17848
B_homologs_PDR1-A3LQW4	QIFGKILPPYMLEKNAQRSHDKSEQERIPALAKAALSQYQAQVPSSLNDQAFG				1.09215	0.216279	1.02572	0.0623009
B_homologs_PDR1-A7TJG7	KDIASNPSIQQFPFLVENDNTGSYNLGTLDEFVNNGDLNDLYNTLWRDLYSVE				41.2819	9.1283	38.068	8.92944
B_homologs_PDR1-B0I4V8	FLPPYMLTSNAPSAVVSNEGTPIPDDLSNISLDPPQKQQETQTQGQNQLFQQP				1.45163	0.914418	1.63346	1.20396
B_homologs_PDR1-B8N1I8	SQSRLQSPVSHASTPASGEAVNSPDLVSLPNNNFMWQGYNFQPQNFPTEQSAQ				2.59475	2.33945	3.07269	2.75425
B_homologs_PDR1-B9VI52	PTGEINVPFPPVYNQNGLDQQTTYNLGTLDEFVNKGDLNELYNSLWGDLFSDV				133.732	12.0123	75.0315	10.5943
B_homologs_PDR1-C4JZE1	PARHERRPSEPMPESASTGYIENPDLVTMPGQAFLWQNLGVQGPGGNIFPQST				1.70504	1.30919	2.76957	2.49943
B_homologs_PDR1-C4R754	LPPYMLNSNKVEQGQNERNLSGQPSSSNTPDGSQPVTVLDGLYPLQNDNNNNH				1.25546	0.558195	1.15706	0.35793
B_homologs_PDR1-C5DHX3	GNERVPGSTVKQGTFAPSSPTMNFNLGSLDDFLNYGEDDLYNKLWSDINTEFP				148.373	12.2672	78.8556	10.7162
B_homologs_PDR1-C5E070	ERPNGSPDYGFQPMFGAGDGSNKFNLGTVDEFVHKGDLNDLYTTLWSDLYSDE				117.461	11.6939	65.648	10.2665
B_homologs_PDR1-C5FE89	PGNTQSPTSEPQHDTNSYSFMGNPDLVTIPGHSFIWQSLAAQGTPSNSYQYPT				1.06022	0.143473	2.62262	2.36566
B_homologs_PDR1-C5P9I1	PARHERRLSESGPDASAPGYLENPDLVTMPGQAFLWQNLGTQGPGSNFFPHSA				2.02295	1.72868	2.90811	2.61919
B_homologs_PDR1-C7Z9U1	TGTFDDVESQIFGQPPPYMMHQQGQPMMGMPGQMYNPSSVMGMQQGQPMMQRR				1.66517	1.25114	2.43091	2.17941
B_homologs_PDR1-E3Q898	PSAFDDIDTQLLGQSPAYFLQGQGQQQRPQQQHHQPGYDLSSIYQPSGYQGMP				3.90123	3.34001	3.09952	2.77559
B_homologs_PDR1-E5AAM5	RLNDTEAQLFGNMPMYVMQGAHPYRGFPPQNGSTHIQMPGPNMQFDEMLNHDE				3.48025	3.05985	3.22713	2.87458
B_homologs_PDR1-E5R3C4	PGNTQSPTSGPQQSTNNYPFMGNPDLVTIPGHSFIWQNLAAQGAPNNTYQYPI				1.20309	0.453656	1.93548	1.62022
B_homologs_PDR1-E9E2J5	SFFFTGSFEEMGDQILGQPPPYMTPQQQQQPHPMGMAASMYDPHSMMTLHSTQ				2.38281	2.13038	4.46301	3.6701
B_homologs_PDR1-F2PJD1	PGNTHSPTSEPQQNTNTYQFMGNPDLVTIPGHSFIWQNLAAQGAPNNSYQYPT				0.999318	-0.00167422	2.23966	1.97836
B_homologs_PDR1-F2Q9E7	SCEREVLSSDEYRQAQYMGNVATKDLDYLRYFLNLDIFPELNTDDELWDDLKE				51.1128	9.65241	22.6192	7.65217
B_homologs_PDR1-F2SDI3	PGNTQSPTSEPQQNTNAYQFMGNPDLVTIPGHSFIWQNLAAQGAPNNSYQYPT				1.07402	0.175209	2.46703	2.2156
B_homologs_PDR1-G0RJX3	PASLDDLGDQFMGQPPPYMMPQQQQQQPPHNPLAMNMAPNMYDPGAMMGIHQQ				12.6644	6.2291	2.53809	2.28528
B_homologs_PDR1-G0V5I5	GSGLLNGSLDGNTQNQDPNLIVGYNLGTLDEFVNNTDMNDLYNVLWSDLYSDS				144.501	12.2023	76.033	10.6268
B_homologs_PDR1-G0WA57	DQLPLSDHTNIPNIINLPEIPGGYNLGTLDEFVNNTDLSDLYNVLWSDLYSDA				143.134	12.179	70.2714	10.4335
B_homologs_PDR1-G2X0E5	FDDMDPHHFLGQGPSYYMQQQQHQQQQQHQQHQTQQQVQPGLDLANMYQNSNL				2.86227	2.5802	2.4981	2.24632
B_homologs_PDR1-G3AI52	ILPPYMLESNANYEQNHPQQQQQQQQATAQPIPPQLPPQILQQQLPGQGPMQQ				1.11996	0.277972	1.2096	0.466891
B_homologs_PDR1-G8BUY7	SSFAQANLLNELTPTKENNMIDGYNLGTLDEFINDGDLNDLYNTFWKDLYPIQ				42.8197	9.21804	62.0328	10.1275
B_homologs_PDR1-G8JW66	RMSPQPAPITNSNIWTSLNDPLVFDLGSLDEFVNYRDVTNLYSVLLEDFLLDS				33.9283	8.64697	10.6023	5.79305
B_homologs_PDR1-G8ZWQ0	ENGSGPMRIPQPNNVSGPLSDQGYHLGTLEEFINNGDLNDLCNTLWSDLYTDG				42.528	9.20126	73.6275	10.5479
B_homologs_PDR1-G9NL19	SMEDMGDQFMGQPPPYMMPQQQQQQQQQQHNAMGMNMPGNMYDPNVMMGMHQQ				3.28483	2.91806	2.93921	2.64528
B_homologs_PDR1-H0GUX2	SSNNNNNNNNNNNNNNNNFSATSFNLGTLDEFVNNGDLEDLYSILWSDVYPDN				126.792	11.8815	86.8974	10.9545
B_homologs_PDR1-H1UZH6	GAFDDIDTQLLGQSPAYFLQGQGHHHQQQQQQQQQQQQHQQQQHQQQQQQQQQ				2.30918	2.05337	2.43523	2.18377
B_homologs_PDR1-H2AX37	FQHVGLEQPRLDSFLDPDAFFSSYNLGTLDEFVNSDMTDLCNILWSDLYPDVF				138.216	12.0932	41.8904	9.1642
B_homologs_PDR1-H6BK54	GASGHFNVPLTDIIMQNAIGGSNLHLGGMGDFSTPAMDIPDVAAGSQHHDEYW				17.7116	7.05208	5.30269	4.09307
B_homologs_PDR1-I2GX40	SDVPNNYGSIMDDSNPNIPLLQGYDLGTLDEFLDHGDLDDLWKTIWSDVYTDD				147.231	12.2482	105.254	11.4247
B_homologs_PDR1-K2RRF5	TVDVELHNPSPFIFAAGTQFGMAPGSIHAAQQHGRQMFGAAGMQDGMGTSSGA				1.61029	1.16891	1.58922	1.13659
B_homologs_PDR1-K3UH48	TGTFDDVESQIFGQPPPYMMHQQSQGMMGVSPQPMYANPANLMAMQQPSQPPT				2.50957	2.25756	2.68714	2.42529
B_homologs_PDR1-L2FUV3	GAFDDIDTQLLGQSPAYFLHQGQGQQQAPQQHHHQHHQSGFDMSNMYQHSGYP				3.26982	2.90682	5.63668	4.24294
B_homologs_PDR1-M2NNN2	DNLEAQFFALPPYIEHKRQQQHEHQQQQQQQQQQPPNTFSQQTNMGFPNSALG				2.27599	2.01785	1.55126	1.07728
B_homologs_PDR1-N1Q5F3	ENIEAQFYALPPYIEQGRSQQQQTPQQHQAPRGMSFPQSQYTNGQDQRTPQAM				1.62376	1.18934	1.32794	0.695897
B_homologs_PDR1-N1QNQ7	TENIEAQFYTLPPYLEQQQQQQQYQMRSMPQLGGGFSQQQPPPPPQAIPYTNG				1.79888	1.44064	2.02905	1.73606
B_homologs_PDR1-Q5B9C8	RMSGSHLQSPVSHGSTPGEAVNSPDLVSIPNQNFVWQGYGIDQQQNFVPDATI				1.85908	1.52141	3.56049	3.11577
B_homologs_PDR1-Q6CB01	YMLNEGGGCQTNPSEQGSMDFNIPDAPVYSNNNMGNLEDTNWSEFFDDDNLLS				75.2954	10.6029	60.073	10.0487
B_homologs_PDR1-Q7RXQ3	YDDGSIEGQVLGPVAPYLMQHGGPEPPHAGVLDPAAQMSYTTMLNLQLQHQQR				1.86173	1.52491	1.20287	0.453189
B_homologs_PDR1-R0IZP1	HQTDTEAQLFGPMPMYMMQGAQQYRGYQPQPGMQMPGPNSVQFDELLNQEDWS				17.6873	7.04872	8.7166	5.31253
B_homologs_PDR1-R1EN16	TVDVELHNPSPFIFAAGTQFGMAPGSMHAQQHGHRQQGQMFGAGAGMQDGMAA				1.54598	1.06892	1.58434	1.12905
B_homologs_PDR1-R7YNW3	GELDVQLFGPMPMYMMQGGQQEQQLEPQGNGNAFQPQRQAQSGGPWGVQQGGV				3.63252	3.16492	4.00737	3.40588
B_homologs_PDR1-S3CT90	AVHFYAAGLYGDIEGQLLGPVPAYLMQTSGAPTGVDLASEMYNASSLLTLQQT				1.18807	0.42282	1.15456	0.352622
B_homologs_PDR1-S3DCI4	SNGNPNPGMYDDLEGQIFGPLPPYLTQGPQNFEYQNQMDMGPGMMENIGPSIG				12.304	6.15826	16.7411	6.91382
B_homologs_PDR1-S6DYH4	QDPNLRQEKQTHVPSISNEDSNKFNLGTLDEFVHKGDLNDLYSTLWSDLYSDE				92.1495	11.0985	58.6814	9.99122
B_homologs_PDR1-T5ALE9	TSFDEIGDQLLNYPPSYMMQQQQQQQQQQQQRQLFGLAGNPYDPHNMLAMHTA				1.15348	0.350328	2.94814	2.65273
B_homologs_PDR1-U4LD33	PFGNHLEGNVLGPIPPYLLQGSSQNMNDSSMDDPSDNVQNENSNGVQGGMMNG				1.55643	1.08545	1.43815	0.891529
B_homologs_PDR1-U7Q183	AMQFYAPNIYNEIEGQLLEPVPAYLMQPSGAPAGIDLASEMYGANSLLTLQQA				1.10747	0.250455	1.46411	0.935417
B_homologs_PDR1-V9DLA3	AQGNRDFHAPFTDFLMQNGIGHDMSHVGGIPRSTEPGTVSVLNGTANAGAYWK				1.72191	1.33335	3.55527	3.11218
B_homologs_PDR1-W1Q7J4	IFGRFLPPYMLNSNQQSADTTPEPEPYPDQYQEPEPEQPGNDLFGSIPSGLST				1.56701	1.10206	1.67718	1.26877
B_homologs_PDR1-W2RNU4	LYEENPQLAAHLAQQQRQFAGQGIPQGFMQEQQAGGGHQQQPTQQMFGMQGAA				1.15476	0.353043	1.21274	0.473256
B_homologs_PDR1-W3WQB5	PSQYYAPNLFDGIEGQLMGPLPPYLMQTPQGQPGFSFPAQMYSDPMLAIQLQR				2.23705	1.97551	1.74726	1.36921
B_homologs_PDR1-W7MZJ7	TGTFDDVESQIFGQPPPYMMHQQGQPMMSAPGHQPMFANPSAIMGMQPGQPMM				1.1553	0.35419	2.97873	2.67806
B_homologs_PDR1-W9PUR1	TGTFDDVESQIFGQPPPYMMHQQGQPMMSASSHQPMFASPSAIMGMQPGQPMM				1.28517	0.615578	3.08114	2.76099
B_homologs_PDR1-W9WYM1	SQTSRDFNAPFTDILMQNALGTDMSHLGGVPNTTESMNMGGGDVNASTNPDEY				3.76609	3.25352	10.2949	5.72086
B_homologs_PDR1-W9WZS3	AQGNRDFHAPFTDFLVQNGIGHDMSHLGAIPRSTEPGTMNDLNGTANAGAYWK				2.57979	2.32527	5.85871	4.33773
B_homologs_PDR1-W9XV63	GGNGGHFSAPLTDILMHNAIGDHLHLGGLGDFSETVNVADIPGASHHEEYWSQ				7.27524	4.86904	5.27543	4.08042
B_homologs_PDR1-W9ZN57	GNGGHFNAPLTDILMHNAIGGENFHLGGMGDFAPSMNLPDLHGAGHREEYWNN				3.02661	2.71718	12.8426	6.26338
B_controls-mean_Met4mut_WT	VTNRGNTNLYDHAVTPEILLEQLAYVDNFIPSLDNEFSNVDWNVNTTHNNANN				30.8667	8.41494	34.5934	8.6946
B_controls-mean_Pdr1mut_WT	NNNNKNNINNINNNNSNNFSATSFNLGTLDEFVNNGDLEDLYSILWSDVYPDS				158.557	12.43	82.9123	10.8393
