# Supplementary material for: Simple biochemical features underlie transcriptional activation domain diversity and dynamic, fuzzy binding to Mediator
Source: eLife journal article supplement (doi:10.7554/elife.68068), 2021-04-27
Supplement: supp [file elife-68068-supp-v2.zip › elife_poa_e68068_Figure_5_source_data_1.xlsx]

## Sheet: Pulldown, TF tiles
	protein sequence	protein	protein ID	position	Med15 pulldown	Med15 enrichment	Med15 Z score	Med15 pulldown rep1	Med15 pulldown rep2	Med15 pulldown rep3	Med15 enrichment rep1	Med15 enrichment rep2	Med15 enrichment rep3	TFIID pulldown	TFIID enrichment	TFIID Z score	TFIID pulldown rep1	TFIID pulldown rep2	TFIID enrichment rep1	TFIID enrichment rep2	DNA
A_controls_GAL4:147-199-1	SIDSAAHHDNSTIPLDFMPRDALHGFDWSEEDDMSDGLPFLKTDPNNNGFFGD				0.0672318	4.54246	4.69107	0.0619763	0.064344	0.0762062	3.76147	5.36856	4.64151	0.0125505	1.1201	0.462809	0.0156845	0.0100427	1.23356	1.01708	TCAATTGACAGTGCAGCCCACCACGACAACTCCACAATCCCGCTCGATTTTATGCCTAGAGATGCTCTGCATGGATTTGACTGGTCTGAGGAAGACGATATGAGCGATGGTTTGCCATTCCTGAAGACCGACCCCAATAACAACGGCTTCTTCGGGGAC
A_controls_GAL4:147-199-2	SIDSAAHHDNSTIPLDFMPRDALHGFDWSEEDDMSDGLPFLKTDPNNNGFFGD				0.0715429	4.83374	4.88371	0.0773722	0.063936	0.0740235	4.69588	5.33452	4.50856	0.0129122	1.15239	0.578755	0.0141294	0.0117999	1.11126	1.19504	TCAATAGACTCAGCCGCCCACCACGACAACTCCACCATCCCCCTCGATTTTATGCCTAGAGACGCACTGCACGGATTCGACTGGAGCGAAGAGGACGATATGTCAGACGGGCTGCCATTTTTGAAGACTGACCCCAACAACAATGGCTTTTTCGGAGAC
A_controls_GAL4:147-199-3	SIDSAAHHDNSTIPLDFMPRDALHGFDWSEEDDMSDGLPFLKTDPNNNGFFGD				0.0815894	5.51252	5.291	0.0787696	0.0692705	0.099539	4.78069	5.7796	6.06264	0.0169731	1.51481	1.69456	0.0200936	0.0143371	1.58034	1.452	TCCATCGACTCAGCTGCTCACCACGACAACAGCACCATCCCCCTGGACTTCATGCCCAGGGACGCGCTGCACGGCTTTGACTGGAGTGAGGAGGATGATATGAGTGACGGGCTGCCCTTCCTGAAGACCGACCCCAATAACAACGGCTTCTTCGGAGAC
A_controls_GAL4:147-199-4	SIDSAAHHDNSTIPLDFMPRDALHGFDWSEEDDMSDGLPFLKTDPNNNGFFGD				0.062578	4.22804	4.46873	0.0647565	0.0557018	0.0679381	3.93021	4.64749	4.13792	0.015221	1.35845	1.25	0.0186759	0.0124053	1.46884	1.25635	TCTATCGATTCCGCGGCCCATCACGACAACTCCACAATTCCTCTCGACTTCATGCCACGGGACGCTCTGCATGGATTCGACTGGTCCGAGGAGGATGACATGAGCGACGGCCTGCCCTTTCTGAAGACGGACCCCAACAATAACGGCTTCTTTGGCGAT
A_controls_GAL4:147-199-5	SIDSAAHHDNSTIPLDFMPRDALHGFDWSEEDDMSDGLPFLKTDPNNNGFFGD				0.0658145	4.4467	4.62503	0.0665897	0.058492	0.0731916	4.04147	4.88029	4.45789	0.0108549	0.968776	-0.129437	0.0134717	0.00874639	1.05953	0.885796	AGCATTGACTCTGCCGCCCATCACGACAACAGCACGATCCCATTGGACTTCATGCCGCGCGACGCCCTGCACGGCTTCGACTGGTCTGAAGAAGACGATATGAGCGACGGACTGCCGTTTCTCAAGACTGATCCAAACAATAACGGGTTCTTTGGCGAC
A_controls_GAL4:147-199-6	SIDSAAHHDNSTIPLDFMPRDALHGFDWSEEDDMSDGLPFLKTDPNNNGFFGD				0.0807827	5.45802	5.2602	0.0772721	0.071337	0.095635	4.68981	5.95202	5.82486	0.0119095	1.0629	0.248892	0.0133691	0.0106092	1.05146	1.07445	TCTATCGATAGCGCAGCCCACCACGACAACTCAACGATCCCCCTGGATTTTATGCCTCGGGACGCGCTGCATGGGTTCGACTGGAGTGAAGAGGATGACATGTCCGATGGTCTGCCCTTCCTGAAGACCGATCCCAACAATAACGGCTTTTTTGGCGAC
A_controls_GAL4:147-199-7	SIDSAAHHDNSTIPLDFMPRDALHGFDWSEEDDMSDGLPFLKTDPNNNGFFGD				0.0853442	5.76621	5.43046	0.0805102	0.0779293	0.0990764	4.88633	6.50206	6.03447	0.0150266	1.34109	1.19754	0.0163895	0.013777	1.28901	1.39527	AGCATTGACTCCGCTGCCCACCACGACAACTCCACGATCCCACTGGATTTCATGCCTAGAGACGCTCTCCACGGTTTCGACTGGTCCGAGGAAGACGACATGAGTGATGGGCTGCCCTTCCTGAAAACGGACCCCAATAACAATGGATTTTTCGGCGAT
A_controls_GAL4:147-199-8	SIDSAAHHDNSTIPLDFMPRDALHGFDWSEEDDMSDGLPFLKTDPNNNGFFGD				0.0889762	6.01161	5.55964	0.0825282	0.0788657	0.108226	5.00881	6.58018	6.59174	0.0108326	0.966789	-0.137818	0.0119966	0.00978158	0.943515	0.990636	TCTATTGATTCAGCCGCACACCACGACAACTCCACCATTCCGCTGGACTTCATGCCCAGGGACGCTCTCCACGGATTCGACTGGAGTGAGGAAGACGACATGTCTGACGGCCTCCCTTTTCTCAAGACGGACCCCAATAATAACGGATTCTTCGGGGAC
A_controls_GLN3:125-138-1	DDDIAMFDSLATTQPIDIAASNQQNGEIAQLWDFNVDQFNMTPSNSSGSATIS				0.043519	2.94033	3.34293	0.0420897	0.039033	0.0501683	2.55451	3.25673	3.05561	0.0107602	0.96033	-0.165169	0.0136909	0.0084569	1.07677	0.856478	GACGACGACATCGCCATGTTCGACTCACTGGCCACTACACAGCCTATCGATATTGCGGCTTCTAATCAGCAAAACGGCGAGATAGCCCAGCTCTGGGATTTTAATGTGGATCAGTTCAACATGACCCCCAGCAACTCCAGCGGGAGTGCAACGATCTCC
A_controls_GLN3:125-138-2	DDDIAMFDSLATTQPIDIAASNQQNGEIAQLWDFNVDQFNMTPSNSSGSATIS				0.0436494	2.94914	3.3522	0.0391473	0.0403027	0.0527106	2.37593	3.36267	3.21046	0.0089917	0.802491	-0.897834	0.00926579	0.00872572	0.728743	0.883703	GACGACGACATCGCCATGTTCGACAGTCTCGCCACCACACAGCCAATTGATATCGCTGCATCAAACCAGCAAAACGGCGAAATAGCCCAGCTGTGGGATTTCAACGTGGATCAGTTCAATATGACCCCTAGTAACTCATCAGGGTCAGCTACCATAAGT
A_controls_GLN3:125-138-3	DDDIAMFDSLATTQPIDIAASNQQNGEIAQLWDFNVDQFNMTPSNSSGSATIS				0.050169	3.38963	3.78368	0.0451488	0.0472038	0.0592495	2.74017	3.93846	3.60872	0.0100879	0.900323	-0.428453	0.0115057	0.00884475	0.904911	0.895758	GACGATGACATCGCTATGTTCGACAGCCTGGCAACCACGCAGCCGATCGACATCGCCGCCAGCAATCAGCAAAACGGGGAAATCGCCCAGTTGTGGGATTTTAACGTCGATCAGTTCAACATGACCCCCAGCAACTCTTCCGGCAGCGCCACAATCTCA
A_controls_GLN3:125-138-4	DDDIAMFDSLATTQPIDIAASNQQNGEIAQLWDFNVDQFNMTPSNSSGSATIS				0.0503264	3.40026	3.79339	0.0497677	0.0471234	0.0543505	3.0205	3.93176	3.31034	0.00985236	0.879303	-0.524848	0.0113971	0.00851697	0.896369	0.862562	GATGACGATATTGCGATGTTTGACAGCCTGGCGACAACTCAGCCAATCGACATCGCAGCTTCAAATCAGCAGAACGGAGAGATCGCGCAGCTGTGGGACTTCAACGTGGACCAGTTCAATATGACCCCTAGCAACTCATCCGGCTCCGCCACTATCTCC
A_controls_GLN3:125-138-5	DDDIAMFDSLATTQPIDIAASNQQNGEIAQLWDFNVDQFNMTPSNSSGSATIS				0.0462842	3.12716	3.53387	0.0454409	0.0395738	0.0551372	2.7579	3.30185	3.35825	0.00985301	0.879361	-0.524579	0.0110131	0.00881511	0.866167	0.892756	GACGATGACATTGCCATGTTTGACAGTCTCGCAACGACCCAACCTATCGACATCGCCGCCTCCAACCAGCAGAACGGAGAAATTGCTCAACTCTGGGATTTTAACGTGGACCAGTTTAATATGACGCCTTCTAACTCATCTGGCTCCGCCACGATCAGC
A_controls_GLN3:125-138-6	DDDIAMFDSLATTQPIDIAASNQQNGEIAQLWDFNVDQFNMTPSNSSGSATIS				0.0495415	3.34724	3.74467	0.0442968	0.0479963	0.0571911	2.68847	4.00458	3.48335	0.010327	0.921668	-0.33284	0.0125832	0.00847539	0.989656	0.858351	GATGACGATATAGCAATGTTCGACAGTCTGGCCACGACCCAGCCGATTGATATCGCTGCTAGCAATCAGCAGAATGGCGAAATTGCCCAACTGTGGGACTTTAACGTGGATCAGTTCAACATGACGCCCTCTAACAGTTCCGGAAGTGCGACGATCAGC
A_controls_GLN3:125-138-7	DDDIAMFDSLATTQPIDIAASNQQNGEIAQLWDFNVDQFNMTPSNSSGSATIS				0.0454464	3.07055	3.47725	0.0422203	0.0403207	0.0551377	2.56244	3.36416	3.35828	0.00956131	0.853328	-0.647202	0.00960001	0.00952277	0.755029	0.964425	GACGATGACATTGCTATGTTCGACAGCCTGGCGACGACCCAACCCATTGACATCGCTGCATCCAATCAGCAGAATGGAGAGATTGCGCAGCTCTGGGACTTCAACGTGGATCAGTTCAACATGACCCCGAGTAACTCCAGTGGTAGCGCGACCATCTCC
A_controls_GLN3:125-138-8	DDDIAMFDSLATTQPIDIAASNQQNGEIAQLWDFNVDQFNMTPSNSSGSATIS				0.0383705	2.59247	2.95267	0.0377458	0.0338845	0.0441695	2.29087	2.82716	2.69024	0.0114851	1.02502	0.100843	0.0141882	0.00929695	1.11589	0.941555	GATGATGATATCGCCATGTTCGACTCACTGGCCACCACGCAGCCGATCGACATTGCCGCCAGCAATCAACAGAACGGCGAGATTGCCCAGCTCTGGGACTTTAATGTGGACCAGTTTAACATGACCCCTAGCAACTCCTCTGGCAGCGCCACAATCAGC
A_controls_HAP4:112-164-1	NNIISNRKQASKEKRKIPRHIQTIDEKLINDSNYLAFLKFDDLENEKFHSSAS				0.0299572	2.02403	2.18547	0.0299093	0.0252076	0.0356587	1.81526	2.1032	2.17187	0.0154128	1.37557	1.30111	0.0170009	0.0139731	1.3371	1.41514	AACAACATCATCAGTAATAGGAAGCAGGCATCCAAAGAAAAACGCAAGATACCCCGGCATATTCAGACCATTGACGAGAAGTTGATCAACGATTCCAACTACCTCGCTTTCCTGAAGTTTGACGACCTGGAGAATGAGAAATTCCACAGCTCTGCCAGC
A_controls_HAP4:112-164-2	NNIISNRKQASKEKRKIPRHIQTIDEKLINDSNYLAFLKFDDLENEKFHSSAS				0.0336237	2.27176	2.54335	0.0303153	0.0271186	0.046239	1.8399	2.26265	2.81629	0.0162471	1.45002	1.5162	0.0224102	0.0117789	1.76253	1.19292	AACAACATCATCAGTAACAGAAAGCAGGCCTCCAAGGAAAAGAGAAAGATTCCCCGGCACATCCAAACCATAGACGAGAAACTCATCAACGACAGCAACTACCTGGCCTTTCTGAAATTTGATGACTTGGAAAACGAGAAGTTTCACTCTTCCGCAAGT
A_controls_HAP4:112-164-3	NNIISNRKQASKEKRKIPRHIQTIDEKLINDSNYLAFLKFDDLENEKFHSSAS				0.0409965	2.7699	3.15785	0.0456856	0.0285741	0.0527824	2.77275	2.38409	3.21483	0.0141886	1.2663	0.963393	0.0150171	0.0134057	1.18108	1.35768	AACAATATCATCTCTAATAGAAAACAAGCCAGCAAGGAGAAACGCAAGATACCCAGGCACATCCAGACCATCGACGAGAAACTCATCAATGATTCCAATTATCTGGCATTTCTGAAATTCGACGACCTCGAAAACGAGAAGTTCCACTCAAGCGCCTCA
A_controls_HAP4:112-164-4	NNIISNRKQASKEKRKIPRHIQTIDEKLINDSNYLAFLKFDDLENEKFHSSAS				0.0313559	2.11854	2.32691	0.032321	0.0249268	0.0382655	1.96163	2.07977	2.33065	0.0129075	1.15197	0.577281	0.0140525	0.0118558	1.10522	1.20071	AATAACATTATTTCCAACCGGAAACAGGCCTCCAAAGAGAAGAGAAAGATACCCAGACATATCCAGACGATTGACGAAAAGCTCATTAACGACTCTAACTACCTCGCCTTCCTGAAGTTTGACGACCTGGAAAACGAGAAGTTCCACTCCTCTGCCTCC
A_controls_HAP4:112-164-5	NNIISNRKQASKEKRKIPRHIQTIDEKLINDSNYLAFLKFDDLENEKFHSSAS				0.0344664	2.3287	2.62007	0.0402328	0.0250482	0.0406285	2.44181	2.0899	2.47457	0.0122678	1.09488	0.369852	0.012774	0.0117816	1.00466	1.19319	AACAATATCATTTCAAACCGGAAGCAGGCCAGCAAGGAGAAACGGAAAATCCCCCGCCACATCCAGACCATCGACGAAAAATTGATTAACGACAGCAATTATCTCGCCTTCCTGAAGTTTGACGATTTGGAGAACGAGAAGTTCCATTCCTCCGCCAGC
A_controls_HAP4:112-164-6	NNIISNRKQASKEKRKIPRHIQTIDEKLINDSNYLAFLKFDDLENEKFHSSAS				0.0366731	2.47779	2.81242	0.0378923	0.0269232	0.0483464	2.29976	2.24634	2.94464	0.0132608	1.1835	0.687441	0.0150761	0.011664	1.18572	1.18128	AATAACATTATAAGCAACCGCAAGCAGGCCTCAAAGGAGAAGCGCAAGATTCCCCGGCATATACAGACGATTGATGAGAAATTGATCAACGATTCTAACTATCTGGCGTTTCTGAAATTCGATGATCTGGAGAACGAGAAGTTCCACTCCTCCGCCAGC
A_controls_HAP4:112-164-7	NNIISNRKQASKEKRKIPRHIQTIDEKLINDSNYLAFLKFDDLENEKFHSSAS				0.0333992	2.25659	2.52258	0.0356005	0.0256533	0.0407951	2.16067	2.14039	2.48472	0.0133329	1.18994	0.709591	0.0146824	0.0121075	1.15475	1.2262	AACAATATCATTTCTAACCGCAAACAGGCCTCCAAGGAGAAAAGGAAGATCCCCCGGCACATCCAGACCATCGATGAAAAGCTGATCAACGACTCAAACTACCTGGCTTTTCTGAAGTTCGACGACCTGGAGAACGAGAAGTTTCACTCCAGTGCCTCC
A_controls_HAP4:112-164-8	NNIISNRKQASKEKRKIPRHIQTIDEKLINDSNYLAFLKFDDLENEKFHSSAS				0.0356038	2.40555	2.72071	0.0360769	0.0269969	0.0463391	2.18958	2.2525	2.82238	0.0124536	1.11146	0.431192	0.0132344	0.0117188	1.04087	1.18683	AATAATATTATCAGCAACAGGAAGCAGGCCTCCAAGGAGAAGCGCAAGATCCCTAGGCACATACAGACAATCGACGAAAAGTTGATCAATGACAGTAACTATTTGGCCTTCCTCAAGTTTGACGACCTGGAAAACGAGAAGTTCCACTCAAGCGCCAGC
A_controls_INO2:1-53-1	MQQATGNELLGILDLDNDIDFETAYQMLSSNFDDQMSAHIHENTFSATSPPLL				0.110963	7.49712	6.2441	0.125977	0.0878952	0.123389	7.64578	7.33356	7.5153	0.0230021	2.05289	2.93485	0.0329405	0.0160622	2.59073	1.62671	ATGCAGCAGGCTACTGGGAACGAGCTGCTGGGCATCCTGGATCTCGATAATGACATTGACTTCGAGACCGCATACCAGATGTTGTCTAGTAACTTCGACGACCAAATGTCCGCCCATATCCACGAAAACACGTTTAGCGCCACATCACCCCCTCTGCTC
A_controls_INO2:1-53-2	MQQATGNELLGILDLDNDIDFETAYQMLSSNFDDQMSAHIHENTFSATSPPLL				0.133252	9.0031	6.81147	0.166451	0.098264	0.144659	10.1022	8.19868	8.81078	0.0246954	2.20402	3.22469	0.0292422	0.0208556	2.29986	2.11216	ATGCAACAGGCCACCGGCAACGAGCTGCTCGGGATCCTCGACCTCGATAATGACATTGACTTCGAAACCGCATACCAGATGCTCAGCAGTAACTTCGATGACCAGATGTCCGCCCACATCCATGAGAATACCTTCTCAGCCACGTCACCTCCCCTCCTG
A_controls_INO2:1-53-3	MQQATGNELLGILDLDNDIDFETAYQMLSSNFDDQMSAHIHENTFSATSPPLL				0.105165	7.10536	6.07775	0.133214	0.0744692	0.117241	8.08504	6.21336	7.14084	0.022177	1.97925	2.78578	0.0273883	0.0179572	2.15405	1.81863	ATGCAGCAGGCCACTGGTAACGAACTCCTGGGAATCCTGGACCTGGACAACGACATCGACTTCGAGACCGCATACCAGATGCTCAGTTCTAATTTTGATGATCAGATGTCCGCCCACATCCACGAGAACACCTTCTCTGCCACCAGCCCCCCACTCCTG
A_controls_INO2:1-53-4	MQQATGNELLGILDLDNDIDFETAYQMLSSNFDDQMSAHIHENTFSATSPPLL				0.11278	7.61988	6.29444	0.140193	0.0830726	0.123171	8.50861	6.93118	7.50202	0.0191731	1.71116	2.1919	0.0237881	0.0154534	1.87091	1.56506	ATGCAGCAGGCGACGGGAAATGAACTCCTGGGGATCCTGGATCTCGACAACGACATAGATTTCGAGACGGCTTACCAAATGCTCTCCAGTAACTTTGACGACCAAATGTCAGCCCACATCCACGAGAATACATTCTCAGCGACCTCCCCGCCTCTGCTG
A_controls_INO2:1-53-5	MQQATGNELLGILDLDNDIDFETAYQMLSSNFDDQMSAHIHENTFSATSPPLL				0.110202	7.44574	6.22278	0.135792	0.0836955	0.11776	8.24148	6.98316	7.17243	0.0202349	1.80593	2.41183	0.0239825	0.0170729	1.8862	1.72907	ATGCAGCAAGCTACCGGCAATGAGCTGCTCGGAATTCTGGACTTGGACAACGACATCGACTTCGAAACCGCCTACCAAATGTTGTCTAGCAACTTCGATGATCAAATGAGCGCCCACATTCACGAGAATACTTTCTCAGCTACCTCCCCCCCTCTGCTC
A_controls_INO2:1-53-6	MQQATGNELLGILDLDNDIDFETAYQMLSSNFDDQMSAHIHENTFSATSPPLL				0.0951466	6.4285	5.76746	0.113369	0.0726197	0.104624	6.88063	6.05904	6.37232	0.0182643	1.63005	1.99375	0.0202928	0.0164386	1.596	1.66483	ATGCAGCAGGCAACAGGCAACGAGCTGCTGGGCATTCTGGACCTGGATAATGACATTGATTTCGAGACGGCGTATCAGATGTTGAGTAGCAATTTTGACGATCAGATGTCTGCCCACATCCATGAGAACACTTTCAGTGCGACAAGTCCTCCGCTGCTC
A_controls_INO2:1-53-7	MQQATGNELLGILDLDNDIDFETAYQMLSSNFDDQMSAHIHENTFSATSPPLL				0.0960778	6.49142	5.79765	0.116851	0.0725773	0.104577	7.09191	6.05551	6.36951	0.0199238	1.77816	2.34861	0.0249346	0.0159199	1.96108	1.6123	ATGCAGCAGGCGACTGGCAACGAACTCCTGGGGATTCTGGACCTGGATAACGACATTGACTTCGAGACCGCCTATCAAATGCTGTCCTCAAACTTCGACGACCAGATGTCCGCCCACATCCACGAAAATACCTTCTCCGCCACTAGCCCGCCCCTGCTG
A_controls_INO2:1-53-8	MQQATGNELLGILDLDNDIDFETAYQMLSSNFDDQMSAHIHENTFSATSPPLL				0.108106	7.30409	6.16325	0.131744	0.0776366	0.123524	7.99582	6.47763	7.52349	0.0213408	1.90463	2.62896	0.0254593	0.0178886	2.00234	1.81168	ATGCAGCAGGCCACCGGAAACGAGCTGCTGGGCATCCTGGATCTGGACAACGATATCGACTTCGAGACAGCCTACCAGATGTTGAGTTCTAACTTCGACGATCAGATGTCAGCCCATATCCACGAGAATACATTCTCCGCTACCAGCCCCCCACTGCTC
A_controls_INO2:108-160-1	GLKLSPSSSGLLSTNESNAIEQFLDNLISQDMMSSNASMNSESHLHIRSPKKQ				0.0219373	1.48218	1.21971	0.0248659	0.0152832	0.02778	1.50916	1.27516	1.692	0.00969094	0.864897	-0.592252	0.0117677	0.00798071	0.925513	0.808251	GGCCTGAAGCTGAGTCCTTCCTCTTCTGGGCTGTTGTCCACCAATGAAAGCAACGCTATCGAGCAATTCCTCGACAACCTCATTTCACAGGATATGATGTCCAGCAATGCCAGTATGAACAGCGAGTCCCATCTGCACATCCGCAGCCCCAAAAAGCAG
A_controls_INO2:108-160-2	GLKLSPSSSGLLSTNESNAIEQFLDNLISQDMMSSNASMNSESHLHIRSPKKQ				0.0165862	1.12063	0.353023	0.019242	0.0123702	0.0191697	1.16784	1.03211	1.16757	0.00995404	0.888378	-0.482951	0.0112297	0.00882332	0.883199	0.893588	GGCCTCAAGCTGAGTCCCAGCTCCAGTGGCCTGCTGAGCACCAACGAGTCTAACGCTATAGAGCAATTCCTCGACAACCTCATAAGCCAGGACATGATGTCATCAAACGCTTCCATGAATTCTGAGTCTCACCTGCACATCCGGTCACCTAAGAAACAG
A_controls_INO2:108-160-3	GLKLSPSSSGLLSTNESNAIEQFLDNLISQDMMSSNASMNSESHLHIRSPKKQ				0.0212843	1.43806	1.12604	0.0213345	0.0144834	0.0312052	1.29483	1.20843	1.90062	0.00983851	0.878067	-0.530586	0.0118588	0.00816238	0.932683	0.82665	GGCCTGAAACTGTCTCCTAGCAGCAGCGGCCTCCTGTCCACCAATGAGAGCAACGCCATCGAACAGTTCCTCGACAATCTGATCAGTCAGGATATGATGTCTAGTAACGCGTCCATGAACAGTGAGAGCCACCTGCATATCAGGAGCCCCAAAAAACAG
A_controls_INO2:108-160-4	GLKLSPSSSGLLSTNESNAIEQFLDNLISQDMMSSNASMNSESHLHIRSPKKQ				0.0189133	1.27786	0.759968	0.0177754	0.0161524	0.0235637	1.07882	1.34768	1.4352	0.011376	1.01528	0.0618873	0.0124404	0.0104026	0.978424	1.05353	GGTCTGAAGCTGTCCCCATCTAGCAGCGGCCTGCTCTCTACTAACGAGAGCAACGCAATTGAGCAGTTTCTGGACAACCTGATCTCCCAGGACATGATGAGCAGCAACGCCTCCATGAATAGTGAGTCCCACCTGCACATCAGGTCCCCGAAGAAACAG
A_controls_INO2:108-160-5	GLKLSPSSSGLLSTNESNAIEQFLDNLISQDMMSSNASMNSESHLHIRSPKKQ				0.0168884	1.14105	0.408992	0.0180343	0.0123502	0.021627	1.09454	1.03044	1.31724	0.0103095	0.920105	-0.339768	0.0122684	0.00866344	0.964893	0.877395	GGCTTGAAATTGTCACCGTCCTCAAGTGGACTCCTGTCAACAAATGAAAGTAACGCCATCGAGCAGTTCCTCGACAACCTCATTTCTCAAGACATGATGTCCAGCAACGCATCAATGAATAGCGAGTCTCATCTCCACATTAGGTCCCCCAAGAAGCAA
A_controls_INO2:108-160-6	GLKLSPSSSGLLSTNESNAIEQFLDNLISQDMMSSNASMNSESHLHIRSPKKQ				0.0206423	1.39468	1.03112	0.0208579	0.0161133	0.0261711	1.26591	1.34441	1.59401	0.0096333	0.859753	-0.616595	0.0115789	0.00801461	0.910667	0.811685	GGTCTGAAGCTCAGCCCCTCAAGTAGTGGGCTGCTGTCAACCAATGAGTCCAACGCTATTGAACAGTTTCTGGATAACCTCATTAGTCAAGATATGATGTCCTCCAATGCTAGTATGAACTCCGAGAGTCATCTGCACATCAGAAGTCCTAAGAAACAA
A_controls_INO2:108-160-7	GLKLSPSSSGLLSTNESNAIEQFLDNLISQDMMSSNASMNSESHLHIRSPKKQ				0.025202	1.70275	1.64972	0.0278919	0.0185953	0.0308619	1.69282	1.5515	1.87971	0.0109595	0.978112	-0.0903039	0.0136736	0.00878407	1.07542	0.889613	GGACTGAAGCTGTCTCCCTCAAGCAGCGGCCTGCTGAGTACAAACGAGAGCAACGCTATAGAGCAGTTCCTGGATAACCTGATTTCCCAGGACATGATGTCAAGTAATGCGAGTATGAACTCAGAATCCCACCTGCATATCCGGAGCCCGAAGAAGCAG
A_controls_INO2:108-160-8	GLKLSPSSSGLLSTNESNAIEQFLDNLISQDMMSSNASMNSESHLHIRSPKKQ				0.0236651	1.59891	1.45469	0.0251125	0.0185615	0.0284329	1.52413	1.54868	1.73177	0.0118265	1.0555	0.220384	0.013361	0.0104683	1.05083	1.06019	GGTTTGAAGCTGAGCCCATCAAGTTCAGGCCTGCTGTCCACGAACGAGAGCAATGCCATCGAACAGTTCCTGGACAACCTGATTAGTCAGGACATGATGTCCTCTAACGCCAGCATGAACAGCGAGTCCCACCTGCATATTCGCAGCCCCAAAAAGCAA
A_controls_MSN2:252-267-1	YSNSISNSNSNSTGNLNSSYFNSLNIDSMLDDYVSSDLLLNDDDDDTNLSRRR				0.0583618	3.94317	4.25253	0.0543806	0.05109	0.0715494	3.30047	4.26271	4.35787	0.0140846	1.25702	0.933381	0.016188	0.0122545	1.27317	1.24108	TACAGTAACAGCATCTCCAATAGCAATTCCAACTCAACCGGCAACCTCAACTCCAGCTATTTCAACAGTCTCAACATTGACTCTATGCTGGACGACTACGTGTCTTCCGATCTGTTGCTGAATGACGATGATGACGACACAAATCTGAGCCGCAGGCGG
A_controls_MSN2:252-267-2	YSNSISNSNSNSTGNLNSSYFNSLNIDSMLDDYVSSDLLLNDDDDDTNLSRRR				0.0504683	3.40985	3.80212	0.0478155	0.0447465	0.0600799	2.90202	3.73343	3.6593	0.0147345	1.31502	1.11744	0.0171341	0.0126709	1.34757	1.28326	TACAGCAACTCAATCAGTAACTCCAACAGCAACTCAACAGGCAACCTGAATTCATCTTACTTCAACTCACTCAACATCGACAGCATGCTGGACGACTACGTGTCAAGTGATCTGCTCCTGAATGACGATGACGACGACACCAATCTGTCTCGCAGAAGG
A_controls_MSN2:252-267-3	YSNSISNSNSNSTGNLNSSYFNSLNIDSMLDDYVSSDLLLNDDDDDTNLSRRR				0.0481358	3.25226	3.65545	0.0452942	0.0432401	0.0569475	2.749	3.60775	3.46851	0.0142909	1.27543	0.99271	0.0169022	0.012083	1.32934	1.22371	TACTCCAACTCAATTTCTAACAGCAACTCAAACTCAACGGGCAATCTGAACTCCAGCTACTTCAATTCACTCAACATTGACAGCATGTTGGATGATTATGTGAGTAGCGATCTGCTGCTCAACGACGACGACGACGATACCAACCTCTCAAGAAGACGC
A_controls_MSN2:252-267-4	YSNSISNSNSNSTGNLNSSYFNSLNIDSMLDDYVSSDLLLNDDDDDTNLSRRR				0.0388563	2.6253	2.99166	0.0349989	0.0374489	0.0447602	2.12415	3.12456	2.72622	0.0122852	1.09643	0.375628	0.0137988	0.0109376	1.08526	1.10771	TATTCCAATTCCATCAGCAATAGCAACTCAAATAGCACTGGTAACCTGAACAGTAGCTATTTCAATTCCCTGAACATAGACAGCATGCTGGACGATTACGTCAGCTCCGACCTGCTGCTGAACGACGATGACGACGACACGAACCTGTCCCGGAGGCGC
A_controls_MSN2:252-267-5	YSNSISNSNSNSTGNLNSSYFNSLNIDSMLDDYVSSDLLLNDDDDDTNLSRRR				0.0532901	3.60051	3.97075	0.0493242	0.0445407	0.0688846	2.99359	3.71627	4.19557	0.0127872	1.14123	0.539046	0.0155628	0.0105065	1.224	1.06406	TACTCTAACTCTATCTCCAATTCAAACAGCAACTCCACCGGAAATCTCAACAGTTCCTACTTCAACAGCCTCAACATCGACTCTATGCTCGACGACTATGTGAGCTCCGACCTGCTGTTGAACGATGATGATGACGACACTAACCTGTCCCGGCGCAGA
A_controls_MSN2:252-267-6	YSNSISNSNSNSTGNLNSSYFNSLNIDSMLDDYVSSDLLLNDDDDDTNLSRRR				0.0376209	2.54183	2.89151	0.0347421	0.0342788	0.0447101	2.10857	2.86006	2.72316	0.0118526	1.05782	0.229358	0.0168862	0.00831942	1.32808	0.842555	TATAGTAATAGCATATCCAACAGTAACTCCAACTCCACCGGCAATTTGAATAGTTCTTATTTCAATTCCCTGAATATCGACTCTATGCTCGATGATTACGTGTCCTCCGATCTGCTCCTGAATGATGACGATGACGACACGAACCTGTCCCGGAGGAGA
A_controls_MSN2:252-267-7	YSNSISNSNSNSTGNLNSSYFNSLNIDSMLDDYVSSDLLLNDDDDDTNLSRRR				0.0442587	2.9903	3.39517	0.0433822	0.0382666	0.0522232	2.63296	3.19278	3.18077	0.0122416	1.09254	0.361126	0.0153539	0.00976017	1.20756	0.988468	TACTCCAACTCCATTTCAAACAGCAACTCAAATTCCACCGGAAACTTGAACTCATCTTACTTCAATAGCCTGAATATCGACTCCATGCTGGACGACTACGTGAGTTCCGATCTGCTGCTCAACGACGATGACGACGATACCAATCTCTCCAGGAGGCGC
A_controls_MSN2:252-267-8	YSNSISNSNSNSTGNLNSSYFNSLNIDSMLDDYVSSDLLLNDDDDDTNLSRRR				0.0613419	4.14452	4.40689	0.0591593	0.0535259	0.0728927	3.5905	4.46595	4.43969	0.0141995	1.26728	0.966537	0.0157537	0.0127986	1.23901	1.29619	TATTCTAATTCAATCAGCAACAGTAACTCAAACTCAACGGGGAACCTGAACTCTAGTTACTTCAATAGCCTGAACATCGACTCTATGTTGGACGACTACGTGTCTAGTGACCTCCTGCTGAACGACGATGACGACGATACTAACCTCTCAAGACGCAGG
A_controls_OAF1:1020-1047-1	NNSINATPIVDNSSGSQLPNGFDRGQANNTPFPGYFGGLDLFDYDFLFGNDFA				0.112402	7.59434	6.28403	0.150842	0.0865131	0.108822	9.15494	7.21824	6.62802	0.0329917	2.94444	4.40654	0.0378353	0.0287681	2.9757	2.91351	AACAACTCCATCAACGCCACCCCTATTGTGGACAACAGTTCTGGAAGCCAACTGCCAAATGGTTTTGACAGAGGGCAGGCAAATAATACACCCTTTCCGGGCTATTTTGGCGGGTTGGATCTGTTCGATTACGACTTCCTCTTCGGCAACGACTTCGCT
A_controls_OAF1:1020-1047-2	NNSINATPIVDNSSGSQLPNGFDRGQANNTPFPGYFGGLDLFDYDFLFGNDFA				0.142467	9.62569	7.01872	0.187643	0.100766	0.152933	11.3884	8.40741	9.3147	0.0382662	3.41518	5.01171	0.0437723	0.0334527	3.44263	3.38795	AACAACTCCATCAACGCCACACCGATCGTCGACAACAGCTCAGGATCCCAGCTGCCTAACGGCTTCGACAGAGGACAGGCCAACAACACCCCCTTCCCGGGCTACTTCGGGGGCCTCGATTTGTTCGATTACGACTTCCTGTTTGGCAATGACTTCGCC
A_controls_OAF1:1020-1047-3	NNSINATPIVDNSSGSQLPNGFDRGQANNTPFPGYFGGLDLFDYDFLFGNDFA				0.106796	7.21562	6.12547	0.137979	0.0790343	0.111697	8.37423	6.59425	6.80316	0.0412414	3.68071	5.31723	0.0520009	0.0327081	4.08981	3.31253	AACAATAGCATCAATGCTACACCAATAGTGGACAACTCCAGCGGGTCCCAACTGCCCAACGGCTTTGACAGAGGCCAGGCCAACAACACTCCTTTTCCTGGGTACTTCGGGGGCCTGGACCTGTTCGACTACGACTTTCTGTTCGGCAACGACTTCGCC
A_controls_OAF1:1020-1047-4	NNSINATPIVDNSSGSQLPNGFDRGQANNTPFPGYFGGLDLFDYDFLFGNDFA				0.121942	8.23889	6.53653	0.161565	0.0870699	0.128897	9.8057	7.2647	7.85074	0.0322545	2.87865	4.31433	0.0362875	0.0286697	2.85397	2.90355	AATAACTCTATTAATGCCACTCCAATCGTGGATAACTCTTCTGGATCCCAACTGCCAAATGGCTTTGATCGGGGACAAGCCAACAATACCCCCTTTCCCGGATACTTCGGCGGGCTGGATCTGTTCGATTACGACTTCCTGTTCGGCAACGATTTCGCC
A_controls_OAF1:1020-1047-5	NNSINATPIVDNSSGSQLPNGFDRGQANNTPFPGYFGGLDLFDYDFLFGNDFA				0.197	13.3101	8.02326	0.26011	0.141029	0.208417	15.7866	11.7668	12.6941	0.0357056	3.18665	4.7291	0.0424375	0.0300416	3.33766	3.04248	AACAATAGCATTAACGCCACGCCCATCGTCGACAATTCAAGCGGTAGCCAGCTGCCGAACGGCTTCGACAGGGGCCAAGCAAATAATACACCATTCCCGGGGTACTTCGGAGGCCTGGATCTCTTTGATTATGACTTCTTGTTCGGGAACGATTTCGCA
A_controls_OAF1:1020-1047-6	NNSINATPIVDNSSGSQLPNGFDRGQANNTPFPGYFGGLDLFDYDFLFGNDFA				0.17164	11.5967	7.59613	0.230995	0.124101	0.176392	14.0196	10.3544	10.7435	0.0409794	3.65733	5.29123	0.0482464	0.034807	3.79452	3.5251	AATAACTCCATAAACGCCACCCCCATCGTGGACAATTCATCCGGGTCTCAGCTGCCTAATGGATTTGATCGCGGGCAGGCAAATAACACACCGTTTCCCGGGTACTTTGGTGGCCTCGACCTGTTTGACTATGACTTCCTGTTCGGCAATGATTTCGCC
A_controls_OAF1:1020-1047-7	NNSINATPIVDNSSGSQLPNGFDRGQANNTPFPGYFGGLDLFDYDFLFGNDFA				0.124046	8.38105	6.58955	0.154757	0.0964059	0.127935	9.39252	8.04365	7.79219	0.0267779	2.38987	3.55503	0.0356856	0.0200937	2.80663	2.035	AACAATTCAATTAATGCCACCCCAATCGTGGATAATAGTAGCGGCTCTCAACTGCCTAACGGCTTTGACCGCGGTCAAGCCAATAATACCCCATTCCCCGGCTACTTTGGGGGCCTGGACCTGTTCGATTACGACTTTCTGTTTGGAAATGACTTCGCC
A_controls_OAF1:1020-1047-8	NNSINATPIVDNSSGSQLPNGFDRGQANNTPFPGYFGGLDLFDYDFLFGNDFA				0.146437	9.89389	7.10391	0.191805	0.104725	0.15633	11.6411	8.73773	9.52161	0.0380178	3.39302	4.98514	0.0427618	0.0338002	3.36316	3.42314	AATAATTCTATCAACGCAACCCCCATCGTGGACAACTCCTCCGGGAGTCAGTTGCCCAACGGATTTGACAGGGGACAGGCCAATAACACTCCATTCCCCGGGTATTTCGGCGGCCTGGATCTCTTCGATTACGACTTTTTGTTCGGAAACGACTTCGCC
A_controls_PIP2:970-996-1	SGSNINNNDNVKLPSNFKNYYDPPMSSLDISMDVPDIFGSLDFFDYDLLFQND				0.14815	10.0097	7.13996	0.18882	0.121491	0.141747	11.4599	10.1366	8.63344	0.066994	5.97908	7.2969	0.0765505	0.0586306	6.02061	5.93785	TCCGGCAGTAATATTAACAACAATGACAACGTCAAGCTGCCGAGCAATTTCAAAAACTACTACGACCCACCTATGTCTAGCTTGGACATCTCAATGGATGTGCCCGATATCTTTGGATCCCTGGATTTTTTCGACTATGACCTCCTGTTCCAGAACGAC
A_controls_PIP2:970-996-2	SGSNINNNDNVKLPSNFKNYYDPPMSSLDISMDVPDIFGSLDFFDYDLLFQND				0.214545	14.4956	8.28771	0.282515	0.16233	0.215335	17.1464	13.5441	13.1155	0.0733887	6.54979	7.6689	0.0788417	0.0683128	6.2008	6.91843	TCAGGATCCAACATCAACAACAACGACAACGTGAAGCTCCCCAGCAATTTTAAGAATTACTACGACCCCCCAATGTCCAGCCTCGACATCTCAATGGATGTGCCCGACATTTTCGGATCCTTGGACTTTTTCGACTACGACCTGCTGTTTCAGAACGAC
A_controls_PIP2:970-996-3	SGSNINNNDNVKLPSNFKNYYDPPMSSLDISMDVPDIFGSLDFFDYDLLFQND				0.217534	14.6975	8.33058	0.288545	0.160189	0.222706	17.5124	13.3654	13.5644	0.085325	7.61509	8.28381	0.099941	0.0728466	7.86023	7.37759	TCCGGGAGCAACATTAATAACAACGACAACGTCAAGCTGCCCTCCAACTTCAAGAACTACTACGATCCCCCAATGTCCAGTCTCGACATTTCTATGGATGTGCCCGACATCTTCGGCAGCCTGGACTTCTTCGACTATGACCTGCTCTTCCAAAACGAC
A_controls_PIP2:970-996-4	SGSNINNNDNVKLPSNFKNYYDPPMSSLDISMDVPDIFGSLDFFDYDLLFQND				0.238558	16.118	8.61654	0.290646	0.184628	0.253	17.6399	15.4045	15.4095	0.0731032	6.52431	7.65299	0.0829537	0.0644224	6.5242	6.52443	TCTGGCTCTAATATCAACAATAACGACAACGTGAAACTGCCTAGCAACTTCAAGAACTATTACGATCCTCCTATGAGCTCCCTCGATATCTCAATGGACGTCCCAGACATCTTTGGCTCCCTGGACTTTTTCGACTACGATCTCCTGTTCCAGAACGAT
A_controls_PIP2:970-996-5	SGSNINNNDNVKLPSNFKNYYDPPMSSLDISMDVPDIFGSLDFFDYDLLFQND				0.238116	16.0881	8.61079	0.307512	0.178252	0.246301	18.6635	14.8725	15.0015	0.0768171	6.85577	7.8552	0.0855328	0.0689895	6.72705	6.98696	AGCGGTAGCAATATCAACAATAACGACAACGTCAAGCTGCCATCTAACTTCAAAAACTACTACGACCCCCCCATGAGCAGCTTGGATATCAGCATGGATGTGCCAGACATATTCGGGTCTCTCGATTTTTTTGACTACGATCTGCTGTTCCAGAACGAC
A_controls_PIP2:970-996-6	SGSNINNNDNVKLPSNFKNYYDPPMSSLDISMDVPDIFGSLDFFDYDLLFQND				0.212103	14.3305	8.25221	0.26409	0.162587	0.222228	16.0282	13.5655	13.5353	0.0734523	6.55547	7.67243	0.0844168	0.0639118	6.63928	6.47271	TCTGGCTCCAACATAAACAACAACGACAACGTGAAGCTGCCCTCCAATTTTAAGAATTATTACGATCCTCCGATGTCAAGCTTGGACATCTCCATGGACGTGCCCGATATTTTCGGCAGTCTGGATTTCTTTGACTACGATCTCCTGTTTCAGAACGAC
A_controls_PIP2:970-996-7	SGSNINNNDNVKLPSNFKNYYDPPMSSLDISMDVPDIFGSLDFFDYDLLFQND				0.227004	15.3374	8.46267	0.285529	0.171296	0.23917	17.3293	14.2921	14.5672	0.0752032	6.71174	7.76856	0.0819428	0.0690179	6.4447	6.98984	AGCGGGTCAAATATTAACAACAACGACAACGTGAAGCTGCCAAGCAATTTCAAGAATTACTACGATCCCCCCATGAGCTCACTGGATATCAGCATGGACGTGCCCGATATTTTCGGCAGCCTGGACTTTTTCGACTATGACTTGCTCTTTCAGAACGAT
A_controls_PIP2:970-996-8	SGSNINNNDNVKLPSNFKNYYDPPMSSLDISMDVPDIFGSLDFFDYDLLFQND				0.239182	16.1601	8.62464	0.313598	0.181351	0.240598	19.0329	15.1311	14.6542	0.0826311	7.37466	8.1529	0.0931761	0.0732795	7.32818	7.42143	TCTGGTTCTAACATCAACAACAACGACAACGTGAAGCTGCCGTCCAACTTCAAGAACTACTACGATCCACCCATGAGCAGTTTGGACATTAGCATGGACGTGCCTGACATCTTCGGGTCCCTCGACTTTTTCGACTATGATCTGCTCTTCCAAAACGAC
A_controls_VP16-1	EVDMTPADALDDFDLEMLGDVESPSPGMTHDPVSYGALDVDDFEFEQMFTDAL				0.26904	18.1774	8.98925	0.293778	0.227746	0.291058	17.83	19.002	17.7275	0.0499269	4.45587	6.09707	0.0596655	0.0417777	4.69262	4.23107	GAGGTGGATATGACACCTGCAGACGCTCTGGACGATTTCGACCTCGAAATGCTGGGAGATGTTGAATCTCCTAGCCCAGGAATGACACACGATCCAGTCTCCTACGGGGCATTGGATGTGGACGACTTTGAGTTCGAGCAGATGTTCACTGACGCCCTG
A_controls_VP16-2	EVDMTPADALDDFDLEMLGDVESPSPGMTHDPVSYGALDVDDFEFEQMFTDAL				0.0990579	6.69277	5.89233	0.108901	0.0845296	0.105591	6.60945	7.05275	6.43123	0.0280427	2.50276	3.74336	0.0321341	0.0244722	2.52731	2.47844	GAGGTCGACATGACCCCCGCCGACGCCCTCGACGACTTCGACCTCGAGATGCTGGGGGACGTGGAATCACCAAGCCCCGGCATGACACACGACCCAGTGTCATACGGCGCTCTGGACGTGGATGACTTTGAATTCGAGCAGATGTTCACTGACGCACTG
A_controls_VP16-3	EVDMTPADALDDFDLEMLGDVESPSPGMTHDPVSYGALDVDDFEFEQMFTDAL				0.140956	9.52357	6.98567	0.159215	0.11533	0.152518	9.6631	9.6226	9.28944	0.0390929	3.48897	5.09893	0.0448745	0.0340563	3.52932	3.44908	GAGGTGGACATGACTCCTGCAGACGCACTGGACGACTTTGACCTGGAGATGCTGGGCGACGTCGAGTCACCATCCCCTGGCATGACCCATGATCCGGTTTCTTACGGAGCGCTGGACGTCGACGACTTCGAATTCGAGCAGATGTTCACCGACGCCCTG
A_controls_VP16-4	EVDMTPADALDDFDLEMLGDVESPSPGMTHDPVSYGALDVDDFEFEQMFTDAL				0.169714	11.4666	7.56116	0.177546	0.146803	0.187548	10.7756	12.2485	11.423	0.0370802	3.30933	4.88324	0.0434264	0.0316614	3.41543	3.20653	GAGGTGGATATGACGCCAGCTGACGCCCTGGATGACTTTGATCTCGAGATGCTGGGAGATGTGGAGTCCCCTAGCCCAGGCATGACGCACGACCCTGTGAGCTACGGCGCCCTGGACGTGGACGACTTTGAATTCGAGCAGATGTTCACCGATGCCCTG
A_controls_VP16-5	EVDMTPADALDDFDLEMLGDVESPSPGMTHDPVSYGALDVDDFEFEQMFTDAL				0.265433	17.9338	8.94742	0.284237	0.229305	0.286927	17.2509	19.1321	17.4759	0.0417918	3.72984	5.37133	0.0505724	0.0345358	3.97745	3.49764	GAAGTTGACATGACCCCGGCGGACGCCCTCGACGATTTCGACTTGGAAATGCTGGGGGACGTGGAAAGCCCCAGTCCAGGAATGACTCACGACCCAGTGTCCTACGGCGCACTGGATGTTGACGATTTTGAGTTCGAGCAGATGTTTACCGATGCCCTC
A_controls_VP16-6	EVDMTPADALDDFDLEMLGDVESPSPGMTHDPVSYGALDVDDFEFEQMFTDAL				0.0719309	4.85996	4.90048	0.0809401	0.0613645	0.0749317	4.91242	5.11997	4.56388	0.0307296	2.74256	4.11671	0.0371657	0.0254081	2.92303	2.57322	GAGGTGGATATGACACCCGCCGACGCCCTGGACGATTTCGACCTGGAGATGCTGGGTGATGTCGAGTCCCCGTCCCCCGGAATGACCCACGATCCTGTCTCCTACGGGGCTCTGGACGTGGATGATTTCGAGTTCGAGCAGATGTTCACGGATGCCCTC
A_controls_VP16-7	EVDMTPADALDDFDLEMLGDVESPSPGMTHDPVSYGALDVDDFEFEQMFTDAL				0.090264	6.09861	5.60417	0.100836	0.0747362	0.097588	6.11995	6.23564	5.94381	0.0286472	2.55671	3.83038	0.0317608	0.0258388	2.49795	2.61684	GAAGTGGACATGACTCCCGCCGACGCCCTGGATGATTTCGACCTGGAGATGCTGGGTGACGTGGAGAGCCCCTCTCCAGGCATGACGCACGACCCCGTGTCATACGGGGCGCTGGACGTCGACGACTTTGAGTTCGAGCAGATGTTCACGGACGCCCTG
A_controls_VP16-8	EVDMTPADALDDFDLEMLGDVESPSPGMTHDPVSYGALDVDDFEFEQMFTDAL				0.174441	11.786	7.64631	0.204008	0.14261	0.182453	12.3817	11.8987	11.1127	0.0468126	4.17793	5.83427	0.0472446	0.0463845	3.71573	4.69762	GAGGTTGATATGACCCCAGCCGACGCCCTGGACGACTTTGATCTGGAGATGTTGGGCGACGTCGAGAGCCCCAGCCCCGGCATGACCCATGACCCCGTGTCCTATGGCGCCCTCGATGTGGACGACTTTGAATTCGAGCAGATGTTCACCGACGCCCTC
A_controls_VP64-1	PADALDDFDLDMLGSDALDDFDLDMLGSDALDDFDLDMLGSDALDDFDLDMLG				0.128108	8.65551	6.68943	0.147361	0.105522	0.135208	8.94367	8.80424	8.23511	0.0332475	2.96727	4.43805	0.0357334	0.0309346	2.81038	3.13292	CCAGCAGATGCTTTGGACGACTTTGACCTGGATATGCTGGGTAGCGACGCTCTGGATGACTTCGATCTCGATATGCTCGGATCTGACGCCCTGGATGATTTCGATTTGGACATGTTGGGGTCCGACGCACTCGACGACTTCGACCTGGACATGCTGGGC
A_controls_VP64-2	PADALDDFDLDMLGSDALDDFDLDMLGSDALDDFDLDMLGSDALDDFDLDMLG				0.0251094	1.69649	1.63831	0.0305365	0.0196412	0.0263949	1.85333	1.63877	1.60764	0.02257	2.01433	2.85746	0.0208429	0.0244402	1.63927	2.4752	CCCGCAGACGCCCTGGACGACTTCGACCTCGACATGCTCGGCAGCGATGCTCTGGATGACTTCGACCTGGACATGCTGGGCAGCGACGCCCTGGACGATTTCGACCTGGATATGCTCGGGTCTGACGCTCTGGACGACTTCGATCTGGATATGCTCGGC
A_controls_VP64-3	PADALDDFDLDMLGSDALDDFDLDMLGSDALDDFDLDMLGSDALDDFDLDMLG				0.0863462	5.83391	5.46663	0.0973465	0.0722486	0.0915334	5.90816	6.02808	5.57504	0.0409817	3.65754	5.29146	0.044029	0.0381453	3.46283	3.86319	CCCGCGGACGCCTTGGATGACTTCGACCTGGACATGCTGGGCTCCGACGCACTGGACGACTTCGATCTGGACATGCTGGGCAGCGACGCTTTGGATGATTTTGACCTCGATATGCTGGGCAGTGACGCCCTGGACGATTTCGACCTCGACATGCTCGGC
A_controls_VP64-4	PADALDDFDLDMLGSDALDDFDLDMLGSDALDDFDLDMLGSDALDDFDLDMLG				0.0690855	4.66771	4.77537	0.086625	0.0577477	0.0659147	5.25745	4.8182	4.01468	0.0401125	3.57996	5.20398	0.0424053	0.0379436	3.33513	3.84276	CCTGCCGATGCGCTGGACGATTTCGACCTGGATATGCTGGGTAGCGACGCACTGGACGATTTCGATCTGGATATGCTCGGCAGCGATGCCCTGGATGACTTCGACCTGGACATGCTGGGGAGTGACGCGCTCGACGACTTTGACCTGGACATGCTGGGG
A_controls_VP64-5	PADALDDFDLDMLGSDALDDFDLDMLGSDALDDFDLDMLGSDALDDFDLDMLG				0.0755673	5.10565	5.05334	0.0933218	0.0561646	0.0823296	5.6639	4.68611	5.01446	0.0350218	3.12563	4.6502	0.0351194	0.0349245	2.7621	3.537	CCCGCTGACGCTCTGGACGATTTCGACCTCGACATGCTGGGATCTGACGCCCTGGACGACTTCGACCTGGACATGCTCGGATCTGATGCCCTCGACGATTTTGACCTGGACATGCTGGGTAGCGATGCTTTGGACGACTTTGACCTGGACATGCTGGGA
A_controls_VP64-6	PADALDDFDLDMLGSDALDDFDLDMLGSDALDDFDLDMLGSDALDDFDLDMLG				0.101113	6.83159	5.95596	0.120306	0.0808211	0.106317	7.30161	6.74333	6.47549	0.0418769	3.73743	5.37963	0.0462902	0.0378844	3.64066	3.83677	CCTGCCGATGCACTCGACGACTTCGACCTGGACATGCTGGGCTCCGATGCTCTGGATGATTTCGATCTGGATATGCTGGGATCTGACGCCCTGGATGACTTTGACCTGGATATGCTCGGCTCCGATGCCTTGGACGACTTTGACCTGGATATGCTGGGA
A_controls_VP64-7	PADALDDFDLDMLGSDALDDFDLDMLGSDALDDFDLDMLGSDALDDFDLDMLG				0.0516706	3.49108	3.87509	0.0578699	0.0407694	0.0584713	3.51224	3.4016	3.56132	0.0415028	3.70404	5.34301	0.0428466	0.0402011	3.36983	4.07139	CCAGCGGACGCGTTGGACGACTTCGACCTGGATATGCTGGGAAGCGATGCCCTGGATGACTTCGATCTCGACATGCTCGGCTCCGATGCCCTCGACGACTTCGACCTGGATATGCTGGGCTCAGACGCGCTGGACGATTTCGATCTCGATATGCTGGGG
A_controls_VP64-8	PADALDDFDLDMLGSDALDDFDLDMLGSDALDDFDLDMLGSDALDDFDLDMLG				0.086661	5.85518	5.47792	0.103812	0.0694937	0.0902146	6.30059	5.79823	5.49472	0.0495475	4.42201	6.06595	0.055215	0.0444617	4.34259	4.50289	CCTGCTGATGCCCTCGACGACTTCGACCTGGACATGCTGGGGTCCGACGCCTTGGACGACTTCGATCTCGACATGCTCGGCTCTGACGCTCTCGACGACTTTGATCTGGACATGCTGGGGAGCGACGCTCTCGACGATTTTGACCTCGACATGCTGGGA
A_nonnuclear_P03873:191	DYINKNKYMINLNMTNKKDMNNNIGPLNMNILSIIYGSMLGDGHAEKRKGGKG				0.0320373	2.16458	2.39355	0.0400897	0.0247676	0.0331171	2.43313	2.06649	2.01707	0.0127944	1.14188	0.541361	0.0134912	0.0121336	1.06107	1.22884	GACTATATTAATAAGAATAAGTACATGATCAACCTGAACATGACCAACAAGAAGGACATGAACAACAATATCGGACCCCTCAACATGAATATCCTGAGCATTATATACGGCTCCATGTTGGGTGATGGCCACGCCGAGAAACGCAAAGGCGGGAAAGGG
A_nonnuclear_P04076:384	PFRETHHISGECVATAERLGLSGIDKLTLEQYQKIDSRFGQDLFETFNFEQSV				0.0191409	1.29324	0.797047	0.0231707	0.0137803	0.0219628	1.40628	1.14976	1.33769	0.010898	0.972622	-0.113271	0.0133536	0.00889389	1.05025	0.900734	CCCTTCCGCGAGACCCACCATATCTCTGGCGAGTGCGTGGCTACAGCCGAAAGACTGGGATTGTCCGGCATTGACAAACTCACTCTGGAACAATACCAGAAGATCGATAGCAGGTTTGGGCAGGACCTGTTTGAGACGTTCAACTTCGAGCAGAGTGTC
A_nonnuclear_P08004:13	SNRKNEPSYELQNAHSGLFHSSNEELTNRNQRYTNQNASMGSFTPVQSLQFPE				0.016333	1.10353	0.305338	0.0162355	0.0148909	0.0180223	0.985367	1.24242	1.09769	0.00841414	0.750945	-1.16873	0.00927169	0.00763591	0.729207	0.773332	TCCAACCGCAAGAACGAGCCTTCCTACGAATTGCAGAACGCTCATAGCGGACTGTTTCACTCTTCCAATGAGGAACTGACAAACCGGAACCAGAGGTATACCAATCAAAATGCCTCAATGGGCAGTTTCACTCCAGTGCAGAGCCTCCAGTTCCCCGAG
A_nonnuclear_P09937:259	SHQVVGIAKLPIAYGYHTNSVYNKNLDKQADLKMKNVLRGTWDTITDLEREIW				0.0185293	1.25192	0.696403	0.0202863	0.0151598	0.0206863	1.23122	1.26486	1.25994	0.0169395	1.51181	1.68649	0.019878	0.0144354	1.56338	1.46195	TCCCATCAGGTCGTGGGGATCGCTAAGTTGCCCATAGCCTACGGCTATCACACTAATAGCGTTTACAACAAGAACCTGGACAAGCAGGCAGACCTGAAAATGAAAAACGTGCTGAGAGGAACCTGGGATACAATCACGGACCTCGAACGCGAGATTTGG
A_nonnuclear_P0CX15:650	HDPWMDVVGFEDPDQVTNRDISRIVLYSYMFLNTAKGCLVEYATFRQYMRELP				0.0118327	0.799466	-0.693714	0.0121062	0.00891042	0.0153584	0.734749	0.743443	0.935434	0.0104017	0.928333	-0.30344	0.0119942	0.00902069	0.943328	0.913576	CACGACCCATGGATGGACGTGGTTGGGTTCGAGGATCCCGATCAGGTCACTAATCGGGACATTTCCAGAATCGTGCTGTACAGCTACATGTTCTTGAACACAGCTAAGGGCTGCCTCGTGGAATATGCCACCTTTAGGCAGTACATGCGCGAGCTGCCT
A_nonnuclear_P0CX15:819	SRVTRKRPREPKSTNDILVAGQKLFGSSFEFRDLHQLRLCHEIYMADTPSVAV				0.0185737	1.25492	0.703809	0.0253933	0.0154265	0.0163571	1.54117	1.28711	0.996267	0.0127745	1.1401	0.534996	0.0130134	0.0125399	1.02349	1.26999	TCAAGAGTGACCCGCAAGAGGCCTCGGGAGCCAAAGTCCACTAACGACATTCTCGTCGCTGGACAGAAACTGTTCGGCAGCTCTTTTGAATTCCGGGATCTGCATCAGTTGCGCCTGTGCCACGAGATCTACATGGCAGACACACCCAGTGTTGCCGTG
A_nonnuclear_P11412:258	MERPVSFDPESIRDEKVKVLKAVAPIDTDDVLLGQYGKSEDGSKPAYVDDDTV				0.0115395	0.779656	-0.771486	0.0137089	0.00899103	0.0124666	0.832021	0.750169	0.759304	0.00766574	0.684152	-1.54883	0.00962774	0.00610356	0.75721	0.618143	ATGGAGCGCCCCGTGTCCTTCGACCCTGAGAGTATTAGGGACGAAAAGGTCAAAGTGCTGAAAGCCGTGGCTCCAATCGACACAGATGATGTTCTGCTCGGACAGTATGGGAAGTCTGAGGACGGCAGCAAGCCGGCATACGTGGACGACGATACCGTC
A_nonnuclear_P14904:423	VVGTALVEELARRNGDKVQYFQIKNNSRSGGTIGPSLASQTGARTIDLGIAQL				0.0117079	0.791033	-0.726582	0.0130611	0.0094047	0.013065	0.792704	0.784683	0.795754	0.0113167	1.00999	0.0405607	0.0106322	0.0120452	0.83621	1.21988	GTGGTCGGCACCGCGCTGGTGGAGGAACTGGCCAGGCGCAATGGGGATAAAGTTCAGTACTTCCAAATCAAGAACAACAGCCGGAGTGGAGGCACAATAGGTCCCTCTTTGGCTTCCCAGACTGGCGCAAGAACCATTGACCTCGGGATCGCCCAGCTG
A_nonnuclear_P16547:76	VSQKAREEAPKVTKRVISPEEDAQTRKQLGQKAKDSSSQSIFNWGFSEAERRK				0.0141819	0.95819	-0.132378	0.0114572	0.0128257	0.0194109	0.695363	1.07011	1.18226	0.0106956	0.954564	-0.18974	0.0124911	0.00915827	0.982409	0.92751	GTGTCCCAGAAGGCGCGCGAGGAGGCTCCCAAGGTGACCAAACGGGTCATTTCTCCTGAAGAAGATGCACAGACAAGAAAGCAGCTGGGACAGAAAGCCAAAGACAGTTCATCCCAAAGCATCTTTAACTGGGGCTTCAGCGAGGCCGAGCGCAGGAAG
A_nonnuclear_P18409:78	QQLEKFMRNSTDIPLQDATETYRQLQPNLNFSVSSANTLSSDNTTVDNDKKLL				0.00912276	0.616372	-1.49989	0.00941187	0.00752006	0.0107271	0.571226	0.627438	0.653356	0.00731094	0.652487	-1.7422	0.00804443	0.00664433	0.632684	0.672909	CAGCAGCTGGAGAAATTCATGCGCAACAGCACCGATATCCCTCTGCAAGATGCTACAGAAACTTACAGACAGCTCCAGCCCAATCTGAACTTTTCTGTGAGCAGTGCCAATACCTTGTCCTCCGACAACACGACCGTCGACAACGACAAGAAGCTGCTC
A_nonnuclear_P21595:128	NYRNAVTNGLQHFDDAPIFKNAKILCTLIKNRLLEGQTSIPMGPLSQRMALDN				0.0131008	0.885148	-0.378146	0.0113091	0.0124771	0.0159351	0.686374	1.04103	0.970565	0.0135105	1.20578	0.763562	0.0164501	0.0110961	1.29378	1.12377	AACTACCGCAACGCAGTGACTAACGGCTTGCAGCACTTTGATGACGCCCCTATCTTCAAGAATGCTAAGATCCTCTGCACACTGATAAAAAATCGGCTGCTCGAGGGACAAACCAGCATTCCAATGGGGCCCCTGTCCCAGAGGATGGCCCTGGACAAC
A_nonnuclear_P24000:0	MKVEVDSFSGAKIYPGRGTLFVRGDSKIFRFQNSKSASLFKQRKNPRRIAWTV				0.0153336	1.036	0.109629	0.0172411	0.0117945	0.0177292	1.0464	0.984075	1.07983	0.0157496	1.40562	1.38929	0.0163922	0.0151321	1.28923	1.53251	ATGAAGGTCGAGGTGGACAGCTTCTCTGGCGCTAAAATCTACCCTGGAAGAGGGACACTGTTTGTGAGGGGTGATTCCAAGATTTTCCGGTTCCAGAACAGTAAGTCAGCAAGCCTCTTTAAGCAGCGCAAAAATCCCCGCCGGATCGCCTGGACCGTT
A_nonnuclear_P25380:179	MDSQNIEIIKDIVISDTSLANIENFNKVQEIDTFNINNNRFLETIHSNVKTIR				0.018335	1.23879	0.663717	0.0207641	0.0144918	0.0204835	1.26022	1.20913	1.24759	0.00899392	0.80269	-0.896826	0.00954144	0.00847782	0.750422	0.858597	ATGGATTCCCAGAATATTGAAATCATTAAGGACATCGTGATTAGCGACACATCTCTCGCCAACATCGAGAATTTCAACAAAGTGCAGGAGATCGACACGTTCAACATCAACAATAACCGCTTTCTGGAGACTATCCACAGTAACGTCAAGACCATACGG
A_nonnuclear_P28006:273	EIKFTFNSWRDIHYVTANFNRTINSNVDEFKFTIDLNSLKYILLIKRIITMEK				0.0106842	0.721868	-1.01018	0.00926862	0.00951204	0.0138336	0.562532	0.793639	0.842563	0.010444	0.932105	-0.286896	0.0122573	0.00889892	0.964022	0.901245	GAGATTAAGTTCACCTTTAACTCTTGGCGCGATATCCACTATGTGACAGCCAACTTTAATCGGACGATCAATAGCAACGTCGACGAATTCAAATTCACCATCGACCTGAACTCCCTGAAGTACATCTTGCTCATCAAGAGGATAATTACTATGGAGAAA
A_nonnuclear_P32660:545	SRELNFSVVINFVLLFILCFVSGIANGVYYDKKGRSRFSYEFGTIAGSAATNG																				TCCCGCGAGTTGAACTTCTCCGTGGTGATCAACTTCGTGCTGCTCTTTATACTGTGCTTCGTTAGCGGCATTGCAAATGGAGTCTACTACGACAAGAAAGGTAGGAGTCGGTTTTCTTATGAATTCGGGACAATCGCTGGGAGCGCCGCCACCAACGGC
A_nonnuclear_P32804:116	VGQTGNWGLYSWCPAIMLTSLTFTFLTDLFSSVWVERKYGLSHDHTHDEIKDT				0.0111502	0.753352	-0.877864	0.0124521	0.0089853	0.0123899	0.755742	0.749691	0.754636	0.0163772	1.46163	1.54873	0.019498	0.0137559	1.53349	1.39313	GTGGGCCAGACCGGCAACTGGGGACTCTACTCATGGTGCCCCGCCATTATGCTGACATCTTTGACCTTTACGTTCCTCACAGACCTGTTCAGCAGTGTGTGGGTCGAAAGAAAATATGGGCTGTCCCATGATCACACCCACGACGAGATCAAGGACACT
A_nonnuclear_P34761:129	SIELQKKNSSSSITSASLEDENDIFIIARFELLNLAINYAVILNSKNELFGPS				0.0185884	1.25591	0.706267	0.0207385	0.0177547	0.0174436	1.25866	1.48137	1.06244	0.0189667	1.69274	2.14774	0.0185828	0.0193586	1.46152	1.96055	TCCATTGAGCTGCAGAAGAAAAATAGCAGCTCCTCAATCACCTCTGCCAGTCTGGAAGATGAGAACGACATTTTCATCATCGCTCGCTTTGAGCTGTTGAACCTCGCCATAAACTACGCAGTGATCCTGAATTCCAAGAACGAACTCTTCGGCCCCAGC
A_nonnuclear_P38071:88	AAIAGNEGVFEVVSLPSGSSKGDLKLGDRVIPLQANQGTWSNYRVFSSSSDLI				0.00753269	0.50894	-2.09351	0.00920743	0.00494147	0.0093941	0.558818	0.412293	0.572168	0.0132313	1.18087	0.678379	0.0134788	0.0129884	1.06009	1.31541	GCCGCAATCGCCGGCAACGAGGGCGTGTTTGAAGTGGTCTCTCTCCCCTCCGGGTCCAGCAAGGGAGACCTGAAACTGGGAGATCGCGTTATCCCTCTGCAGGCTAACCAGGGTACCTGGAGTAATTACAGGGTGTTCAGCAGCTCATCCGACTTGATT
A_nonnuclear_P38335:641	KVMRAQKMTKTIYRLLEFGIVLVLWTIWFLFSVLRSIRFTIFLVLKIIKALLW				0.00942187	0.636581	-1.39989	0.00891898	0.00868255	0.0108006	0.541311	0.724431	0.657836	0.0102822	0.917669	-0.350583	0.0100286	0.0105423	0.78874	1.06767	AAGGTGATGCGCGCTCAGAAAATGACTAAAACCATCTACCGGCTCCTCGAGTTTGGCATTGTTCTGGTGTTGTGGACAATATGGTTCCTGTTCTCCGTGCTGAGAAGCATTAGGTTTACGATCTTCCTGGTCCTCAAGATCATCAAGGCCCTGCTGTGG
A_nonnuclear_P38799:422	LLPIKFQILALFAMQNDDTANVLPEYTNNSSYKGKKRNYSQEQKGISLIKNLV				0.0151772	1.02544	0.0778601	0.0168218	0.0129356	0.0160664	1.02095	1.07928	0.978562	0.0114248	1.01964	0.0793516	0.014531	0.00898256	1.14284	0.909715	CTGCTGCCCATCAAGTTCCAGATTTTGGCACTCTTTGCCATGCAAAATGACGATACCGCTAATGTGCTGCCTGAGTACACAAACAACAGTAGCTATAAGGGCAAGAAACGCAACTACTCCCAGGAACAGAAAGGGATATCTCTCATCAAGAACCTGGTC
A_nonnuclear_P38870:616	SLTSLCEQFPTSSLRFLQELANHFQLINSKYSLPPQTIQDLFRDNSDIDIPLA				0.0193055	1.30436	0.823584	0.0216758	0.0256514	0.0129406	1.31555	2.14023	0.788175	0.0161053	1.43737	1.48043	0.0170259	0.0152345	1.33907	1.54288	AGCCTGACCTCCCTGTGCGAGCAGTTCCCGACATCTTCCTTGAGGTTTCTCCAGGAACTCGCCAATCACTTCCAGCTGATCAACTCAAAGTACAGCCTGCCTCCACAAACTATTCAGGATCTCTTCCGCGACAACAGTGACATCGACATACCCCTGGCT
A_nonnuclear_P38921:193	AICGSIAGGIAAATTTPLDFLKTRLMLNKTTASLGSVIIRIYREEGPAVFFSG				0.0102118	0.689952	-1.15035	0.0104365	0.00973222	0.0104843	0.633413	0.812011	0.638568	0.0105704	0.943387	-0.237802	0.0102155	0.0109376	0.803439	1.10771	GCCATCTGCGGCAGCATAGCCGGTGGGATTGCGGCCGCTACCACAACCCCTCTGGACTTTCTGAAGACCAGATTGATGCTCAACAAAACGACTGCTTCTCTGGGATCCGTCATTATCCGCATCTACAGGGAAGAGGGGCCCGCAGTGTTCTTCAGTGGC
A_nonnuclear_P39007:422	KIFDIYLDFKTSDRKYAIKPAALLAKLIVSGSFIFYLYLFVFHSTWVTRTAYS				0.011455	0.773951	-0.79425	0.0122853	0.0113411	0.0107882	0.745622	0.946244	0.65708	0.0140213	1.25137	0.914994	0.015428	0.0127428	1.21339	1.29054	AAGATTTTCGACATCTACCTGGATTTCAAGACTTCAGACCGCAAGTATGCGATAAAACCCGCTGCACTGCTGGCCAAACTCATCGTGAGTGGCTCCTTTATCTTCTATTTGTACCTCTTCGTGTTTCACAGCACGTGGGTCACACGGACCGCCTACTCT
A_nonnuclear_P40008:25	FSKVYAILRRELPFPATDKVVAIVERDNSKWSQLITNEMNPQVLFTALATTRA				0.0111033	0.750183	-0.890927	0.011342	0.00814791	0.0148121	0.68837	0.679823	0.902163	0.0120205	1.07281	0.286762	0.0111125	0.0130027	0.873982	1.31686	TTCTCCAAGGTCTACGCCATCTTGCGGAGGGAGCTGCCATTTCCTGCAACAGATAAAGTGGTTGCGATCGTGGAACGCGACAACTCTAAGTGGAGCCAGCTGATTACTAACGAGATGAATCCCCAGGTGCTCTTCACGGCCCTGGCTACCACCAGAGCC
A_nonnuclear_P40053:0	MIRYTVAGHSRRCVVGASKRVGAIKCITVAATKRFISNKPNEVFTKLTNDNDP				0.011972	0.808877	-0.657439	0.00982047	0.0126022	0.0138649	0.596025	1.05147	0.844473	0.0135163	1.2063	0.765327	0.0145846	0.0125263	1.14706	1.26861	ATGATCAGATACACAGTGGCCGGACACAGCAGGCGCTGCGTTGTCGGGGCATCTAAACGGGTCGGCGCTATAAAATGTATTACTGTGGCGGCCACGAAGCGCTTTATCTCCAATAAGCCAAACGAGGTGTTCACCAAGCTGACCAACGACAACGATCCC
A_nonnuclear_P41544:75	NAYGLSISLLWLLDSLICVFFLTVIVGRSKLAWDFAITIHAINFIVVFLYTRK				0.00983203	0.664293	-1.26781	0.00951979	0.00828554	0.0120498	0.577776	0.691306	0.733922	0.0121788	1.08694	0.340161	0.0109573	0.0135366	0.861775	1.37093	AACGCCTATGGCCTCTCCATTTCTCTGCTCTGGCTGCTGGATAGCTTGATCTGCGTGTTTTTTCTGACAGTGATAGTTGGGAGGAGTAAACTCGCATGGGACTTCGCTATCACTATTCACGCCATCAATTTCATCGTGGTCTTCCTGTACACCCGCAAG
A_nonnuclear_P43567:0	MTKSVDTLLIPGPIILSGAVQKALDVPSLGHTSPEFVSIFQRVLKNTRAVFKS				0.0148042	1.00024	0.000732366	0.018339	0.0137534	0.0128639	1.11303	1.14751	0.783504	0.0103996	0.928141	-0.304286	0.0120608	0.00896717	0.948565	0.908156	ATGACGAAGAGTGTCGACACCTTGCTCATCCCTGGCCCCATTATACTCAGCGGGGCAGTTCAGAAAGCCCTGGATGTGCCATCCCTGGGACACACTTCACCGGAGTTTGTGTCCATCTTCCAGCGCGTGCTGAAGAACACACGGGCTGTCTTCAAGTCT
A_nonnuclear_P43639:88	EDEVDQEMQSNDGHDEGKRRNKSPVVNKSIIEHAAEQLYGLIHARFILTKPGL				0.0171417	1.15816	0.455126	0.0236463	0.0125413	0.0169845	1.43515	1.04639	1.03448	0.0111808	0.997864	-0.00872492	0.0137153	0.00911466	1.07869	0.923093	GAGGACGAGGTGGACCAGGAGATGCAATCCAACGATGGCCATGATGAAGGAAAGCGGAGGAATAAGAGCCCTGTCGTGAACAAATCTATCATTGAGCACGCTGCAGAACAGCTGTACGGGCTGATACACGCCCGCTTCATCCTCACCAAGCCCGGCTTG
A_nonnuclear_P48415:389	NDFTGKNIENESQKLMGEGNHKLPLSAEADIIEPGKDIQDQAEDLFTQSSGDL				0.0162141	1.09549	0.282684	0.0156678	0.0156496	0.0173845	0.950914	1.30573	1.05884	0.00828492	0.739413	-1.23188	0.00899057	0.00763465	0.707097	0.773205	AACGACTTCACCGGCAAGAACATAGAGAACGAGAGTCAGAAACTGATGGGTGAGGGGAATCACAAGCTGCCTCTCTCCGCTGAAGCAGATATCATTGAACCCGGAAAAGATATCCAAGACCAGGCCGAGGACCTGTTTACACAGAGCTCTGGCGACTTG
A_nonnuclear_P53156:76	IRDLNNKTGTVNLVSDGPNDEIDLKNGDAFGLIAIDNHPFRDNHHLAAKLIFR				0.0169258	1.14358	0.415842	0.016577	0.0130091	0.022485	1.00609	1.08542	1.3695	0.00729302	0.650888	-1.75221	0.00779862	0.0068202	0.613352	0.690721	ATCCGCGACCTCAACAATAAGACAGGGACCGTGAACCTGGTCTCCGACGGACCTAATGATGAGATTGACTTGAAAAACGGTGATGCCTTCGGCCTGATCGCAATAGACAACCATCCCTTTAGGGATAATCACCACCTCGCTGCCAAGCTGATCTTCCGG
A_nonnuclear_P53179:335	ETLQFQSRVYLKVPLDAFSTLTTVGKFFSFQYYIEVMVNLSKKNVVYTESNRI				0.00732818	0.495122	-2.17883	0.00711238	0.00667189	0.00829323	0.431665	0.556671	0.505117	0.00630713	0.562898	-2.34484	0.00786911	0.00505519	0.618896	0.511967	GAGACCCTGCAGTTCCAAAGCAGGGTTTATCTGAAAGTCCCTCTCGACGCCTTTAGTACTTTGACAACCGTCGGCAAGTTTTTCTCTTTCCAGTACTACATCGAGGTGATGGTGAACCTGTCCAAGAAGAATGTGGTGTACACGGAATCAAACCGCATT
A_nonnuclear_P53244:156	LSSPVFNKIIRRKTHSSHRKILELPENGVTGTPFEGLRENARSRSSSSNTLNN				0.0107239	0.724549	-0.998692	0.0107081	0.00924415	0.0124587	0.649898	0.771288	0.758825	0.0123145	1.09905	0.385369	0.0132706	0.0114273	1.04372	1.15731	CTGAGCTCCCCTGTGTTCAACAAGATTATCCGGCGCAAGACCCACAGCTCACATCGGAAAATCCTGGAGTTGCCAGAGAATGGGGTCACTGGCACGCCCTTTGAAGGACTGAGAGAGAATGCCAGGTCTCGCTCCTCCAGCAGTAACACACTCAACAAC
A_nonnuclear_P53753:324	SSSTGNILLSSLFSTVDSSSSPVSSTLDTIYVSSSMQATISSSSSSRQTKTSS				0.0108005	0.729728	-0.976615	0.0122992	0.00836534	0.0122454	0.746464	0.697964	0.745833	0.0117208	1.04606	0.183727	0.0125344	0.01096	0.985815	1.10998	TCCTCCAGCACGGGCAACATCCTGTTGAGTTCCCTGTTCAGCACAGTCGATTCATCTTCTAGCCCCGTGTCCTCAACACTCGACACCATTTACGTGAGTTCCTCTATGCAGGCCACTATCAGTAGCTCAAGCTCCAGCAGGCAGACCAAGACCTCCAGC
A_nonnuclear_P53871:228	TSKTDEAASLHFSCGSSFVETSPGEYRVERLDRNQDVIMVASEPLTFERGDWT				0.0193119	1.30479	0.824619	0.0177784	0.0184457	0.0219628	1.07901	1.53902	1.33769	0.0101767	0.908252	-0.392676	0.010611	0.00976017	0.834545	0.988468	ACCTCAAAGACCGACGAGGCAGCTTCTCTGCACTTCTCCTGCGGGAGTAGCTTTGTTGAGACATCCCCTGGAGAATACAGAGTCGAACGGCTCGATCGCAACCAGGATGTGATCATGGTGGCCAGCGAGCCCCTGACGTTCGAGAGGGGCGACTGGACT
A_nonnuclear_P53943:455	KGWRIESILITSFVCSYCAMSTLSTSTTLLVDLYPTKSSTASSCFNFVRCSLS				0.0109066	0.736899	-0.946306	0.0102116	0.00916064	0.0138693	0.619763	0.76432	0.844739	0.00887487	0.792064	-0.9512	0.0127857	0.00616025	1.00558	0.623883	AAGGGCTGGCGCATCGAGAGCATCCTCATTACGTCCTTCGTGTGTAGTTACTGTGCTATGTCTACCCTGAGTACATCCACCACTTTGCTGGTGGACCTGTATCCCACCAAATCCTCTACAGCCTCATCCTGCTTTAACTTCGTCCGGTGCAGCCTCAGC
A_nonnuclear_Q03177:205	PVERAELDSSAESNKEARAKSMRIKQQVSSLNNPKEKQFLDSATEKYEEKEKL				0.0106528	0.719746	-1.01931	0.0122693	0.00970927	0.010148	0.744651	0.810095	0.618086	0.00811474	0.724224	-1.31657	0.00930964	0.0070732	0.732191	0.716343	CCTGTGGAGCGCGCCGAGCTGGATAGCAGCGCCGAGTCCAACAAAGAAGCACGGGCTAAATCTATGAGGATCAAGCAGCAAGTCTCCAGTCTCAATAACCCCAAGGAAAAACAGTTCCTGGACTCAGCGACCGAAAAGTACGAGGAGAAGGAGAAGTTG
A_nonnuclear_Q04806:288	TIVRFDVVYHQHFKCNLATIRDDYSRIHTWLKNIYWRHEAFQRTTDFTHIKLG				0.0108981	0.73632	-0.948743	0.0140672	0.00804398	0.0114386	0.853766	0.671152	0.696691	0.0134156	1.19731	0.734809	0.0152797	0.0117789	1.20173	1.19292	ACCATCGTGCGCTTCGACGTGGTCTACCACCAGCACTTTAAGTGCAATCTGGCCACAATACGGGACGATTACTCCCGCATTCATACCTGGCTCAAAAACATCTATTGGAGGCATGAGGCTTTCCAGAGAACCACGGACTTCACTCACATCAAGCTGGGC
A_nonnuclear_Q05902:478	HGNAVSLTTTINLLFGSLVHDPKTGVIFNNEMDDFAQFNKSNSFELAPSIYNF				0.0289916	1.9588	2.08392	0.036866	0.0235355	0.0280847	2.23747	1.96369	1.71056	0.0135938	1.21322	0.788666	0.0147508	0.0125276	1.16013	1.26874	CACGGGAACGCAGTGTCACTGACTACCACCATTAATCTGTTGTTTGGAAGCCTCGTCCATGATCCCAAAACAGGCGTGATCTTCAATAATGAGATGGACGACTTCGCCCAGTTCAACAAGTCTAACTCCTTTGAACTGGCTCCTAGTATCTACAACTTC
A_nonnuclear_Q06677:38	VADVARTDKSPNDSLHSISAPPLIPSPKVDFSAPPLVPTNSTTKSNTANNTPP				0.00939922	0.635051	-1.40735	0.0110535	0.00688999	0.0109033	0.67086	0.574868	0.664088	0.00800475	0.714408	-1.37225	0.00910296	0.00703904	0.715936	0.712884	GTTGCCGACGTGGCCCGCACCGACAAGTCCCCGAACGACTCCCTCCACAGCATTTCTGCTCCTCCCCTGATCCCCTCACCAAAAGTGGATTTCAGTGCGCCGCCACTGGTCCCCACTAATAGCACAACCAAGTCCAATACCGCAAACAACACGCCTCCC
A_nonnuclear_Q07798:0	MNATKELTFNLLNKFQDKERFGSAQRHAGISLKGFISGILFSFLYFLFQLSLF				0.0145907	0.985811	-0.0442946	0.0160562	0.0128141	0.0150974	0.974482	1.06915	0.919538	0.014777	1.31882	1.12921	0.0129956	0.0168027	1.02209	1.7017	ATGAACGCCACCAAGGAACTGACATTCAACCTGCTCAATAAATTCCAGGACAAAGAGCGCTTTGGGAGTGCACAAAGACACGCTGGTATTTCACTGAAGGGATTCATCTCTGGCATCTTGTTCTCCTTCCTCTACTTTCTCTTTCAGCTGAGCCTGTTC
A_nonnuclear_Q08347:155	RTVIYTHSHSDHYGGVKGIVKEADVKSGEVQIIAPVGFMESVVAENILAGNAM				0.0161071	1.08827	0.262177	0.0188907	0.0121109	0.0182655	1.14651	1.01048	1.1125	0.00968375	0.864255	-0.595281	0.0104337	0.00898771	0.820597	0.910236	CGCACAGTGATCTACACCCACTCTCACAGTGACCATTATGGCGGAGTCAAGGGGATAGTGAAGGAAGCTGATGTCAAAAGCGGGGAAGTGCAGATTATCGCACCCGTTGGTTTCATGGAGTCCGTGGTGGCGGAGAATATCCTGGCCGGCAACGCCATG
A_nonnuclear_Q08754:359	INNTNNRMDYKSELLCLQAQFLIDKRQDYSLAQNIAQEAVNCSPSEFRPWYLL				0.0264848	1.78942	1.80361	0.0317487	0.0241517	0.0242279	1.92689	2.0151	1.47566	0.0126772	1.13141	0.503802	0.0166246	0.00966706	1.30751	0.979038	ATCAACAACACCAACAACCGGATGGACTACAAGAGTGAGCTCCTCTGTTTGCAAGCCCAGTTTCTGATCGACAAACGCCAGGATTATTCTCTGGCACAGAATATTGCTCAGGAAGCCGTGAATTGCAGCCCTTCCGAGTTCAGGCCCTGGTACCTGCTG
A_nonnuclear_Q08818:460	TFYYNHYPSDGVLPPTLDTLSIKMYANYKFQAEDTRPQFDLLQSVSINPTDYE				0.0300507	2.03035	2.19513	0.0357403	0.024572	0.0309006	2.16915	2.05017	1.88207	0.014459	1.29044	1.04044	0.0161505	0.0129448	1.27021	1.31099	ACCTTCTACTATAACCACTATCCTAGTGACGGCGTCCTGCCACCCACACTCGATACGCTGTCTATTAAAATGTACGCCAACTACAAGTTCCAGGCTGAGGACACTAGACCGCAATTTGATTTGCTGCAGAGCGTGTCCATCAATCCCACCGACTACGAA
A_nonnuclear_Q12079:149	LGVNMNTSGSELNQNCLILKLGEKTALPFPGLAQQICYTKGASNEFTNYKLSD				0.0254974	1.72271	1.68584	0.0315574	0.0207704	0.0252895	1.91529	1.73299	1.54031	0.00902608	0.80556	-0.882262	0.0094113	0.00865663	0.740187	0.876706	CTGGGCGTGAACATGAACACCAGCGGGAGTGAGCTGAATCAGAATTGCCTCATTCTGAAGTTGGGTGAAAAAACAGCCCTCCCCTTTCCTGGACTGGCACAGCAAATCTGTTATACTAAGGGCGCTTCCAACGAGTTCACCAACTACAAGCTGTCTGAC
A_nonnuclear_Q12096:335	PKILNKKEKYDMDLINEEMYNLKKIIYKQFIFFRKVRKLFKPEVLVLPFARYG				0.0171649	1.15973	0.459315	0.0190598	0.0135916	0.0195224	1.15678	1.13401	1.18906	0.0139991	1.2494	0.908548	0.0141147	0.0138845	1.11011	1.40616	CCTAAAATTCTGAACAAAAAGGAAAAGTACGATATGGACTTGATAAATGAGGAGATGTACAACCTGAAGAAGATCATCTACAAGCAGTTCATCTTCTTCCGGAAGGTGAGGAAACTCTTTAAACCAGAGGTCCTGGTGCTCCCCTTTGCCCGCTATGGC
A_nonnuclear_Q12169:66	MCLHFIISILFSKYIFVFLFAFLLPSAFPLFILHSTLFRKPCLSIIGFLKTKV				0.0100177	0.67684	-1.20982	0.00904884	0.00896214	0.0123966	0.549193	0.747759	0.755043	0.0110809	0.988952	-0.0453303	0.0127665	0.00961792	1.00407	0.974061	ATGTGTCTGCACTTCATTATCTCCATCCTGTTCAGTAAGTACATATTCGTCTTCCTCTTCGCCTTTCTCCTGCCATCTGCTTTTCCTCTCTTTATTCTGCATAGCACACTGTTTAGAAAGCCCTGCCTGTCAATCATCGGCTTCTTGAAAACCAAGGTG
A_nonnuclear_Q12252:565	NRYNTLATPRMGIVYPGIEILVCIYICYSIIAPILLFFSTVMLTLLYVAYLYN				0.0121593	0.821536	-0.609308	0.0125733	0.0103203	0.0138545	0.763099	0.861075	0.843836	0.0138495	1.23604	0.864705	0.0147713	0.0129853	1.16175	1.31509	AACCGCTACAATACCCTGGCTACTCCTAGGATGGGCATTGTGTATCCAGGGATCGAGATCTTGGTGTGTATCTACATCTGCTACAGCATCATAGCACCCATTCTCCTGTTCTTTTCCACAGTTATGCTCACCCTGCTGTATGTCGCCTACCTGTACAAC
A_nonnuclear_Q12325:78	SDVSLYDNSVSQFEETTVSLKEYYDHSIRSHLTVKGACSYLKSVFPIINWLPH				0.0120275	0.812632	-0.643086	0.0122779	0.013016	0.0108875	0.745172	1.08599	0.663128	0.0108925	0.97213	-0.115334	0.0137402	0.00863494	1.08065	0.874509	TCCGACGTTAGCCTCTACGACAATTCAGTGTCCCAGTTTGAAGAGACTACCGTGAGCTTGAAGGAGTACTATGATCACAGCATTAGAAGTCACCTGACAGTGAAAGGCGCCTGCTCTTACCTGAAGTCCGTCTTCCCTATCATCAACTGGCTGCCCCAT
A_nonnuclear_Q12482:605	TVNDFMRNRLTDKNGKLSLFPEIISGASAGACQVIFTNPLEIVKIRLQVQSDY				0.0166327	1.12378	0.361697	0.019305	0.0179628	0.0132692	1.17166	1.49873	0.808187	0.00925999	0.826436	-0.777864	0.00823834	0.0104083	0.647935	1.05411	ACCGTGAACGACTTCATGAGGAACCGGCTGACTGATAAGAATGGAAAGTTGAGCCTGTTCCCCGAAATCATTAGTGGGGCATCTGCTGGCGCCTGCCAAGTTATATTTACAAACCCTCTGGAGATCGTGAAAATCCGCCTCCAGGTCCAGTCCGACTAC
A_nonnuclear_Q99296:536	DVAHPYKRRCSFRVRRVSTSAPTADYSNNNVNASLGTPAADSIATSSSNSAPQ				0.0115569	0.780831	-0.766819	0.016428	0.0131385	0.00715138	0.997049	1.09621	0.435571	0.00957637	0.854672	-0.640781	0.011948	0.0076755	0.939695	0.777341	GACGTGGCCCACCCGTACAAGAGGCGGTGCTCCTTCCGCGTTAGACGCGTGTCTACATCTGCTCCTACCGCGGATTATAGCAATAACAACGTCAATGCCTCCCTGGGCACTCCAGCCGCAGACTCAATCGCCACGTCCAGCAGTAACAGCGCTCCCCAG
A_random_1	AGTEVSALDDKGVKQTATIEAIYDETKVTQRTDTALYTDYAAFHNPYHMALFL				0.0237734	1.60623	1.46884	0.0216758	0.0182479	0.0339691	1.31555	1.52252	2.06896	0.0126966	1.13315	0.510043	0.014935	0.0107937	1.17462	1.09314	GCCGGGACCGAGGTCAGCGCCTTGGACGACAAGGGCGTGAAGCAGACAGCTACCATTGAAGCTATCTACGATGAGACGAAAGTGACCCAGAGGACTGATACAGCACTGTATACTGACTACGCGGCCTTTCATAACCCCTACCACATGGCCCTGTTCCTC
A_random_10	NGCQFKEPAKVNTATYSSLNNTDQDIETQIEVLSDARGMGARLDKVNQYDQPF				0.0155198	1.04858	0.147039	0.0146678	0.0127928	0.0199217	0.890222	1.06737	1.21338	0.00925562	0.826046	-0.779792	0.0103002	0.00831696	0.810099	0.842306	AACGGATGCCAGTTTAAGGAGCCTGCTAAGGTGAACACCGCAACATATAGCTCTCTCAATAATACGGACCAGGACATTGAGACTCAAATCGAAGTGCTGTCCGATGCCAGAGGGATGGGCGCCAGGCTGGATAAAGTCAACCAGTACGACCAGCCCTTC
A_random_11	FFFVFKIKYENKPFNLGLFKLDPQLSQPLNRLRNMLTDIIKVQLDRAPKDLIS				0.0102517	0.692648	-1.13826	0.0103218	0.00895528	0.011656	0.626453	0.747186	0.709937	0.0101306	0.904132	-0.411226	0.0114831	0.00893733	0.903131	0.905134	TTCTTTTTCGTCTTCAAGATAAAGTACGAGAACAAGCCGTTCAACCTCGGCCTGTTTAAATTGGATCCTCAGCTCTCCCAACCCCTGAATAGGCTGAGAAACATGCTGACCGACATTATCAAAGTGCAGCTCGACCGCGCCCCAAAGGACCTGATCAGC
A_random_12	LKSSPGSQVTSGYARNKVRSIIDNEETQGSAYEDHISLGYVFNTALEESLPFM				0.0468911	3.16816	3.57424	0.0522729	0.0350642	0.056251	3.17255	2.92559	3.42609	0.0108951	0.972368	-0.114338	0.0113782	0.0104326	0.89488	1.05657	CTGAAGAGCTCCCCTGGGTCACAGGTGACCTCCGGCTACGCTCGCAACAAAGTGAGATCTATCATCGATAATGAAGAGACTCAGGGAAGCGCCTACGAAGACCACATTAGTCTGGGTTATGTCTTTAACACAGCATTGGAGGAGAGCCTCCCCTTCATG
A_random_13	LTPMINYKQAFAVMSTKLQPNPSINFKRDQLNLFSMTKENSDANFYYDKFNIN				0.0209606	1.41619	1.07855	0.0215441	0.0170721	0.025038	1.30755	1.42441	1.52499	0.0100008	0.892547	-0.463847	0.0121199	0.00825214	0.953214	0.835741	CTGACTCCCATGATCAATTACAAACAAGCCTTTGCTGTGATGAGCACAAAGCTGCAGCCAAACCCTAGTATTAACTTCAAACGCGATCAGCTCAACTTGTTCTCCATGACCAAGGAGAACTCTGACGCAAACTTCTACTATGACAAGTTTAATATCAAT
A_random_14	ADTSPQAVFYKIKPSGWWEFIAFRGEQPSLTIMLFLRDYATEPFQNNDLSVQT				0.0137671	0.930161	-0.224399	0.0168014	0.0100582	0.0154405	1.01971	0.839207	0.940436	0.0139818	1.24784	0.90348	0.0182562	0.0107081	1.43583	1.08447	GCCGACACTTCCCCACAGGCCGTCTTCTACAAGATCAAACCCAGCGGCTGGTGGGAATTTATTGCTTTTCGCGGAGAGCAACCTAGTCTGACCATCATGCTGTTCTTGAGAGATTATGCAACGGAGCCGTTCCAGAATAACGACCTCTCTGTGCAGACA
A_random_15	YHYEKKVLRPLYSDNKDTDQAGWSPSGDPLESMTFDFGKQMSEVTRCERMSQT				0.0213153	1.44015	1.13055	0.0237803	0.017433	0.0233606	1.44327	1.45452	1.42283	0.0087438	0.780367	-1.01191	0.008816	0.0086722	0.693367	0.878283	TACCACTACGAGAAGAAGGTGCTGCGGCCCCTCTATTCCGACAACAAAGATACTGATCAGGCCGGCTGGTCTCCTAGCGGAGACCCACTGGAATCAATGACATTTGACTTCGGGAAACAAATGAGTGAGGTCACCCGCTGCGAGAGGATGAGCCAGACG
A_random_16	SQKNGTSAANALVYGGFSHTVTQHTIKDVSIDGTWLEEEIDGFKSDTLGFHVD				0.0448473	3.03007	3.43612	0.0466948	0.0338844	0.0570088	2.83401	2.82715	3.47224	0.00953645	0.851109	-0.657828	0.0103247	0.00880837	0.812025	0.892074	TCCCAGAAGAACGGGACGAGCGCCGCTAATGCACTGGTGTACGGAGGTTTCTCACATACAGTTACCCAGCACACCATCAAAGATGTCAGTATCGATGGCACTTGGCTGGAAGAGGAGATTGACGGCTTTAAGTCTGACACCCTCGGGTTCCACGTGGAC
A_random_17	IARETMILKKLSLSIKLNGDFTIVSGQATQIWPIPTERPNAKAEITRRMRKAR				0.0112094	0.757351	-0.861453	0.0136027	0.00770881	0.0134316	0.825575	0.643187	0.818084	0.0108837	0.971349	-0.118614	0.0150481	0.00787175	1.18352	0.797217	ATCGCGCGCGAGACCATGATCTTGAAGAAACTGTCCCTGTCTATCAAACTCAACGGCGACTTCACGATTGTGAGCGGACAGGCTACACAGATATGGCCCATTCCAACTGAAAGGCCTAATGCAAAGGCCGAGATCACCCGCAGAATGCGGAAGGCCCGG
A_random_18	YEHLWNKHRQGDILSYNNNTHSENLLPDLQSYTNLHSEMTVSQKIECVLHVGV				0.0191342	1.29279	0.795961	0.0215726	0.0159539	0.0203545	1.30929	1.33112	1.23973	0.0106268	0.948421	-0.216085	0.0110897	0.0101833	0.872188	1.03132	TACGAGCACCTGTGGAACAAGCATCGCCAGGGAGACATCTTGAGTTACAATAACAACACACACTCCGAAAATCTCCTGCCCGATCTGCAAAGCTATACTAACCTCCATTCAGAGATGACCGTGTCTCAGAAAATTGAGTGCGTTCTGCACGTGGGCGTC
A_random_19	SIMATLIREQSFWENLLPIAASETAKTRRLQDPVSKPRGLNEEAHKIYPGAHQ				0.0260341	1.75898	1.75041	0.026011	0.0210216	0.0322706	1.57866	1.75394	1.96551	0.00858859	0.766515	-1.08499	0.00845257	0.0087268	0.664784	0.883812	AGTATCATGGCCACCCTGATCCGGGAGCAGTCCTTCTGGGAAAATCTCCTGCCTATAGCTGCGTCTGAAACTGCAAAGACAAGGCGCTTGCAAGACCCGGTGAGCAAACCAAGAGGACTGAACGAGGAGGCCCATAAGATTTACCCCGGCGCCCACCAG
A_random_2	IDGIDLEEAGNFREIETYYRDYLSPIDRLSIISVQENNVIFQDKGNVSRENIE				0.0343273	2.3193	2.60754	0.0349523	0.0258208	0.0448203	2.12133	2.15437	2.72988	0.010557	0.942187	-0.242995	0.0116161	0.00959437	0.913593	0.971677	ATCGACGGAATCGATCTGGAAGAGGCCGGCAATTTTCGCGAAATAGAAACCTACTATCGGGATTACCTGTCCCCTATCGACAGACTCTCTATTATCAGTGTGCAGGAGAACAACGTGATTTTCCAGGACAAGGGGAATGTCAGCAGGGAGAACATCGAG
A_random_20	INQSKGNLVEKKLIVPFRPAKIDKGQVVNNIVSTPKVLTLTRDYDYQKWKVKL				0.0148354	1.00234	0.00725858	0.0165756	0.0144266	0.0136542	1.00601	1.20369	0.831641	0.0100934	0.900814	-0.426226	0.011053	0.00921707	0.869306	0.933465	ATCAACCAGTCCAAGGGCAACTTGGTTGAGAAGAAACTGATTGTCCCTTTCAGGCCCGCCAAAATAGATAAGGGACAAGTCGTGAATAACATCGTGAGCACCCCAAAAGTGCTGACACTGACTCGCGACTATGACTACCAGAAGTGGAAGGTGAAGCTC
A_random_21	RELMGVDLAWEEQGGGIGHVPSKWLKSIALGVEERLIFLNADKGVTLKEFLTF				0.0138954	0.938832	-0.195639	0.0127832	0.0115664	0.0181459	0.775838	0.965043	1.10521	0.0164078	1.46437	1.55637	0.0167927	0.0160318	1.32072	1.62363	CGCGAGCTGATGGGCGTCGACCTGGCCTGGGAGGAGCAGGGTGGCGGAATCGGGCACGTTCCTTCCAAGTGGTTGAAGAGCATTGCTCTGGGCGTGGAAGAAAGACTCATCTTTCTGAACGCAGATAAAGGGGTGACACTCAAGGAGTTCCTGACCTTC
A_random_22	IVEVSTNGWIVERAEVDLDVDFELTKALKHIFGLRNPFTLSNIVYREFLDLET				0.0174044	1.17591	0.502263	0.0182195	0.0146648	0.0197315	1.10578	1.22356	1.20179	0.018137	1.61869	1.96521	0.0191813	0.0171495	1.50859	1.73683	ATTGTGGAGGTGTCCACCAACGGGTGGATCGTGGAGCGCGCTGAAGTCGATCTGGATGTTGACTTCGAACTCACAAAAGCCCTCAAGCACATATTCGGCTTGAGGAATCCCTTTACTCTGAGCAACATCGTCTACCGGGAGTTCCTGGACCTGGAGACC
A_random_23	EQPIGGPSKTKNAVLNGKYGSIFNDLLSRTDLEDQPWQSRIFLEVEFKKKEAL				0.0133938	0.904941	-0.3096	0.0174645	0.0106985	0.0128597	1.05996	0.892632	0.783249	0.0101661	0.907302	-0.396943	0.0128152	0.00806458	1.0079	0.816746	GAGCAGCCCATCGGCGGGCCTAGCAAGACCAAGAACGCCGTCCTCAATGGAAAATACGGCAGTATTTTCAACGACCTGCTCTCTAGGACAGACCTGGAAGATCAACCATGGCAGTCCCGCATCTTTTTGGAAGTGGAGTTCAAAAAGAAGGAGGCTCTG
A_random_24	HPYRDTDDCLTSKLQIRQYGMKYGSEKPELRPKDEIANEHSIPNDAEHYEDFD				0.0229136	1.54814	1.35467	0.0202579	0.0225063	0.0263864	1.2295	1.87782	1.60712	0.0104855	0.935806	-0.270724	0.0128377	0.00856423	1.00967	0.867348	CATCCATACCGCGACACAGACGATTGCCTCACCAGCAAGCTGCAGATTAGGCAGTATGGAATGAAGTACGGCTCTGAGAAGCCGGAACTGAGACCTAAAGATGAAATCGCTAATGAGCACTCCATCCCCAACGATGCCGAGCACTACGAGGACTTCGAC
A_random_25	LGTGEAGAVFKDTPTILDLRLSSSRHFQRSLMMERASSADFIGTLSIEGVLEE				0.0107542	0.726599	-0.989935	0.0151933	0.00491159	0.0166671	0.922115	0.4098	1.01514	0.00871024	0.777372	-1.0276	0.00756707	0.0100261	0.59514	1.0154	CTGGGGACCGGCGAGGCCGGAGCTGTCTTCAAGGACACTCCCACAATTCTCGATCTGCGGTTGTCCTCAAGCAGGCACTTTCAGCGCAGTCTCATGATGGAAAGAGCAAGCTCTGCCGACTTCATCGGTACGCTGTCCATCGAAGGCGTGCTGGAGGAG
A_random_26	GRLDMSLITREKNSALAIPFKNFACGVQHSDGRAETHRDAEAQYELSSPTIEK				0.0100504	0.679051	-1.19971	0.0124636	0.00793784	0.0102615	0.756442	0.662296	0.624998	0.00965484	0.861675	-0.607483	0.00867404	0.0107465	0.682202	1.08836	GGCAGGCTGGACATGTCCCTGATCACTCGGGAGAAGAACTCTGCACTCGCCATTCCTTTCAAGAATTTTGCTTGCGGAGTGCAGCATAGTGATGGGCGCGCCGAAACACACAGAGACGCGGAAGCCCAGTACGAGTTGAGCTCACCCACCATCGAGAAA
A_random_27	YRVSCRPTEGSLCASYVSERNAKKIFQEADEKDMKDRSVKKEPCGHDLPYDRD				0.0110012	0.743288	-0.919549	0.013643	0.00901662	0.0108235	0.828023	0.752304	0.659227	0.00684176	0.610613	-2.01284	0.00841676	0.00556148	0.661967	0.563243	TACCGCGTGTCATGCCGCCCTACCGAGGGCAGTCTGTGTGCAAGCTATGTCTCCGAACGGAACGCTAAAAAGATCTTCCAGGAGGCCGATGAAAAGGATATGAAGGACAGATCTGTGAAAAAGGAGCCATGCGGGCACGACCTCCCCTACGACAGGGAC
A_random_28	MACPASELVSNASEYRKVKASSAAKKSIAAPFECIVKKKPNKAVVERESIEIT				0.0136272	0.920714	-0.256042	0.0151731	0.0112225	0.0148615	0.920886	0.93635	0.90517	0.00745413	0.665267	-1.66305	0.00923254	0.00601829	0.726128	0.609506	ATGGCCTGCCCCGCCTCCGAGCTGGTTAGTAATGCCTCAGAGTACAGAAAAGTGAAAGCTTCTTCCGCTGCGAAGAAGAGCATTGCAGCCCCATTCGAATGTATAGTGAAAAAGAAGCCTAACAAGGCAGTCGTGGAACGCGAGAGCATCGAGATCACC
A_random_29	TDKPETQQSFKSKNSEKEKIDSDHAKVTSIPGIFANTYNSIPRDLHEGFKSKG				0.0127032	0.858279	-0.473693	0.012819	0.0100069	0.0159801	0.778014	0.83493	0.973301	0.00769454	0.686722	-1.53353	0.00891075	0.00664433	0.700819	0.672909	ACCGATAAGCCCGAGACTCAGCAGTCTTTCAAGAGCAAGAACAGCGAAAAGGAGAAAATCGACAGTGACCACGCTAAAGTGACATCAATCCCAGGGATATTTGCCAATACGTACAACTCCATTCCTAGAGACCTGCATGAGGGCTTCAAATCCAAGGGA
A_random_3	ILHMYDTGVEFHVFDLSKARQPLGPNVQNRLLTNSFTIAIDVNFYAFTVRSTV				0.00764166	0.516303	-2.04899	0.0089693	0.00679578	0.00732092	0.544366	0.567007	0.445897	0.0175091	1.56266	1.82145	0.0178367	0.0171876	1.40283	1.74069	ATTCTGCACATGTACGACACGGGCGTCGAGTTTCATGTGTTTGATTTGAGCAAGGCAAGACAGCCTCTGGGACCCAATGTCCAGAACAGGCTCCTGACTAACTCTTTCACCATCGCTATCGACGTGAACTTCTATGCCTTCACAGTTCGCTCCACCGTG
A_random_30	LKGCRYFNTVFLMGPISSFVMVKQLKARRLLEYDSNIDLWKDMKLSARICTTR				0.0145601	0.983741	-0.0508112	0.018232	0.0108464	0.0156088	1.10654	0.904974	0.95069	0.0157246	1.40339	1.38281	0.0171643	0.0144056	1.34995	1.45894	CTGAAGGGCTGTCGCTACTTCAATACTGTGTTCCTGATGGGGCCCATTAGTTCCTTTGTCATGGTGAAACAGCTCAAAGCTAGGCGCCTGCTCGAGTATGATAGCAACATCGACTTGTGGAAGGACATGAAGCTGTCTGCCAGAATCTGCACAACCCGG
A_random_31	RIVSYSHYPSNSFFIRLIDFVFKEDHHEEQGFLLASTTINLEYIESPFSEDVT				0.00908098	0.613549	-1.51411	0.0117925	0.00544601	0.0116604	0.715714	0.454389	0.7102	0.0128943	1.15079	0.573092	0.0142798	0.0116432	1.12309	1.17918	CGCATTGTGTCCTACTCCCACTACCCTAGCAACAGCTTCTTCATACGGCTCATCGACTTCGTGTTTAAGGAGGATCACCATGAAGAACAGGGCTTTCTGTTGGCCTCTACAACCATCAATCTGGAGTATATCGAGTCACCCTTCAGTGAGGACGTCACT
A_random_32	AIRKFDLVYPLNTSALFWSTLQGEPKGKADYLYQRKLYQGAPINSFKIVWGAL				0.0128548	0.868522	-0.43692	0.0142316	0.01305	0.0114374	0.863745	1.08883	0.69662	0.0111832	0.998076	-0.00785656	0.012349	0.0101274	0.971236	1.02566	GCTATTCGCAAGTTCGACCTGGTCTATCCCCTGAATACCTCTGCCCTCTTTTGGAGCACACTCCAGGGTGAGCCAAAAGGAAAGGCAGATTACCTGTACCAGAGAAAACTGTACCAAGGGGCGCCTATCAACTCCTTCAAGATCGTGTGGGGCGCCTTG
A_random_33	TSPKSETIGRLPPEPFGTDEDNDPDIESDNYDFYDVVTINTLSVHGDIHLIQC				0.0285521	1.9291	2.03657	0.0292916	0.0266321	0.0298377	1.77777	2.22206	1.81733	0.0155281	1.38585	1.3315	0.0178811	0.0134847	1.40632	1.36567	ACGTCCCCCAAGAGCGAGACCATTGGAAGACTGCCACCGGAACCCTTTGGCACTGATGAGGATAATGATCCTGACATCGAGTCTGACAACTACGACTTCTATGACGTGGTGACAATAAACACCCTGAGTGTCCATGGGGACATCCACCTCATCCAGTGC
A_random_34	DVGNSSFTAVERMIVMEKRTQGDIGPILPNTISKFPSNFSRELVNWSFELNNL				0.0226134	1.52786	1.31379	0.0298987	0.0177881	0.0217429	1.81461	1.48415	1.3243	0.0116573	1.04039	0.161564	0.0123836	0.0109736	0.973955	1.11136	GACGTGGGCAACAGTTCCTTCACAGCCGTGGAGCGCATGATTGTCATGGAAAAAAGGACTCAGGGGGATATCGGACCAATCTTGCCCAATACCATAAGCAAGTTTCCTTCCAACTTCTCTCGGGAGCTGGTTAATTGGAGCTTCGAGCTGAACAACCTC
A_random_35	YNRNNSLQNADGRPAYNVVLRFLFAHKCAPASKQFEFELATSLNIEGTRKLRG				0.0123884	0.837012	-0.551463	0.0148054	0.0102645	0.0125109	0.898568	0.856417	0.762005	0.0145599	1.29945	1.06882	0.0180337	0.0117554	1.41832	1.19053	TACAACCGCAACAACTCCCTGCAGAACGCTGACGGCAGACCTGCATATAATGTGGTCCTCAGGTTTCTGTTTGCCCACAAGTGCGCGCCCGCCAGCAAACAGTTCGAATTCGAGCTCGCCACATCTCTGAATATCGAGGGAACCCGGAAGTTGCGCGGG
A_random_36	RPEYYNLKTDDSDMPTYDSKFEIFFYEMKLPVADKDDSAPEPDKYSFIRTFHL				0.0369695	2.49781	2.83737	0.0369984	0.030581	0.0446576	2.24551	2.55153	2.71997	0.0119036	1.06237	0.246886	0.0153386	0.00923783	1.20637	0.935567	CGCCCCGAATATTACAACCTGAAGACTGACGACAGTGACATGCCCACATACGACAGCAAGTTTGAGATTTTCTTCTACGAGATGAAGCTCCCTGTGGCCGACAAAGATGATTCTGCTCCGGAGCCAGATAAATATTCCTTTATCCGGACCTTCCACCTG
A_random_37	SFPTGVQLKHEGAATPILVYKSGVKGTIIIHDAIVTSDQEIFLLVKAHDDHVK				0.0142022	0.959562	-0.127943	0.0144035	0.0102711	0.0193635	0.874177	0.856975	1.17937	0.0115198	1.02812	0.113152	0.013667	0.0097099	1.0749	0.983376	TCCTTTCCCACCGGCGTGCAGTTGAAGCACGAAGGAGCAGCTACACCTATTCTGGTTTACAAAAGCGGCGTGAAAGGGACGATTATCATCCATGATGCCATAGTCACTTCTGATCAGGAGATCTTCCTGCTCGTCAAGGCCCACGACGACCACGTGAAG
A_random_38	PDISAYDDERLKEGRLIAEFILNRTQYAPDETSKNDRVSDSEVPWMDFPSELN				0.0417397	2.82011	3.21353	0.0401124	0.0324772	0.0558199	2.43451	2.70974	3.39984	0.0114119	1.01849	0.0747507	0.0137073	0.00950087	1.07806	0.962207	CCTGACATCTCCGCCTACGACGATGAGAGGTTGAAAGAGGGCAGACTCATCGCTGAATTTATTCTGAACCGGACCCAGTATGCACCAGACGAAACATCAAAGAATGATCGCGTCTCTGATAGCGAGGTGCCCTGGATGGACTTCCCGAGTGAGCTGAAC
A_random_39	AIFAPSNFYVPNSSIEKIPAILNLTSEKNLYIQSKGLSNDLTPATFLKPAGYE				0.0128569	0.868669	-0.436394	0.0126442	0.011633	0.0144486	0.767405	0.970606	0.880026	0.00848572	0.757333	-1.13416	0.00899743	0.00800311	0.707636	0.810521	GCGATTTTCGCCCCCAGCAACTTCTATGTGCCAAATTCCAGTATAGAGAAGATCCCCGCTATCCTGAACTTGACAAGCGAAAAGAACCTCTACATCCAGTCTAAAGGGCTGTCAAATGACCTGACTCCGGCAACCTTTCTCAAGCCTGCCGGCTACGAG
A_random_4	PSRIVSKYILVGEVVLCTKFVRKVKKLGIKDGDDDVIASEGVVTGPLQAGLCC				0.0104944	0.709049	-1.06572	0.0124112	0.0097126	0.00958804	0.753259	0.810373	0.583981	0.0104213	0.930076	-0.295785	0.0124712	0.00870827	0.980844	0.881936	CCCTCCCGCATCGTGTCTAAGTACATTCTGGTGGGCGAGGTCGTCCTGTGCACCAAATTCGTGAGGAAGGTGAAGAAGTTGGGAATCAAAGACGGTGACGATGATGTCATAGCCAGCGAAGGCGTTGTGACAGGGCCTCTCCAGGCTGGGCTGTGTTGC
A_random_40	EETEAKILAYKGFSLKRIQTAANLNTVKLGETFDDFMLASLEFTIRSKGKKSD				0.0152235	1.02856	0.0872856	0.0153739	0.0130126	0.0176357	0.933074	1.08571	1.07414	0.0126933	1.13285	0.508997	0.013882	0.0116064	1.0918	1.17545	GAGGAGACCGAAGCCAAGATATTGGCGTACAAGGGGTTCTCTCTCAAAAGAATTCAGACTGCAGCCAACCTCAATACGGTGAAACTGGGAGAGACATTTGATGACTTTATGCTGGCTTCCCTGGAATTCACCATCCGCAGTAAAGGCAAGAAGAGCGAC
A_random_41	QTHEHDQPVSPRQFTTLSVSLHISMADYLVTLSVPTNSKDNGLSKDNITLDVS				0.0138577	0.936282	-0.20407	0.0188165	0.00978399	0.0144549	1.14201	0.81633	0.880409	0.0103374	0.922593	-0.328747	0.0130502	0.00818857	1.02638	0.829303	CAGACCCACGAGCACGACCAGCCCGTTTCCCCTCGCCAATTCACGACCCTCTCAGTGTCTTTGCATATCTCCATGGCCGATTACCTGGTCACACTCAGTGTGCCAACTAATAGCAAAGATAACGGCCTGAGCAAGGACAACATTACCCTGGACGTGAGC
A_random_42	CKFLSSFYNFFKPSSSKKNVKLIKSLTEPMKGHPKNLPCMPFRGVITREPEYP				0.0143422	0.969019	-0.0975456	0.0156617	0.0107589	0.0175081	0.950542	0.897671	1.06637	0.0131224	1.17115	0.644653	0.0134946	0.0127605	1.06133	1.29233	TGCAAGTTTCTGTCATCCTTCTACAACTTCTTCAAGCCCTCTAGCTCCAAGAAGAACGTCAAGCTCATTAAAAGCTTGACAGAGCCAATGAAAGGGCACCCCAAAAATCTGCCGTGTATGCCTTTTAGGGGCGTGATCACCCGCGAACCTGAGTATCCC
A_random_43	YYTLGGESENYVKANTVLLAKKAVLLFILSNHAPKLTYVQYANTDKEKKIGDN				0.011347	0.766654	-0.823609	0.0141364	0.00799735	0.012923	0.857968	0.667261	0.787104	0.0168474	1.50359	1.66424	0.0205131	0.0138367	1.61333	1.40132	TACTATACCCTGGGCGGGGAGAGCGAGAACTATGTGAAGGCTAATACAGTCCTGTTGGCAAAAAAAGCCGTGCTCCTCTTCATTCTGTCCAATCACGCGCCCAAACTGACTTACGTTCAGTACGCCAACACCGATAAGGAAAAGAAGATCGGAGACAAC
A_random_44	TQTKFAADSRAMLAYILVSERLQNPYRNKIPLLSKNISYAKGVITIELNKKFN				0.0120789	0.816102	-0.629878	0.0134638	0.00897122	0.0145902	0.817148	0.748516	0.88865	0.0105579	0.942269	-0.242642	0.0126118	0.00883845	0.9919	0.89512	ACCCAGACTAAATTTGCCGCCGACAGCCGGGCAATGCTGGCTTACATACTCGTGTCTGAAAGACTGCAGAATCCTTACCGCAACAAGATTCCCTTGCTGTCCAAAAACATCAGTTATGCGAAGGGCGTCATCACAATCGAGCTCAACAAGAAGTTCAAT
A_random_45	IQEHRPFSAYNNTRSNPDTDSRRISLDREGQSDDSAPSEKNTKGGSGGSPQVR				0.0117701	0.795238	-0.71015	0.0123694	0.00892561	0.0147692	0.750722	0.744711	0.899548	0.0089082	0.795039	-0.935903	0.0116086	0.00683599	0.912999	0.69232	ATCCAGGAGCACAGGCCGTTCTCAGCTTACAACAATACTCGCAGCAACCCAGACACAGATTCCAGACGCATTAGCCTGGATCGGGAAGGACAATCTGACGACAGCGCCCCTTCCGAGAAAAACACCAAGGGCGGTTCCGGCGGGAGTCCCCAGGTGCGG
A_random_46	ESLNKAEKLRTREHNSKKVETEFYVFLTNANIFLLYLMCKSKSAQTDGPSHGE				0.0152646	1.03134	0.0956508	0.0189663	0.0134904	0.013901	1.15111	1.12558	0.846673	0.0196551	1.75418	2.2932	0.0194741	0.0198378	1.53161	2.00908	GAGTCCCTGAACAAAGCCGAAAAGTTGAGGACACGCGAACATAATAGCAAGAAGGTGGAGACTGAGTTCTATGTCTTCCTCACCAACGCTAACATCTTTCTGCTCTACCTGATGTGCAAAAGTAAGTCAGCACAGACGGACGGGCCCTCTCACGGCGAG
A_random_47	LYSVPAWLRDGSIQSPGLSTNIRTAGPIMMGAVKSKLEFHLSMQKRASYNGAC				0.0142724	0.9643	-0.112676	0.0157642	0.0119441	0.0154405	0.956764	0.996558	0.940436	0.00838921	0.74872	-1.18084	0.00810757	0.00868062	0.63765	0.879136	CTGTATTCCGTGCCCGCTTGGCTCCGGGACGGTTCAATCCAGTCTCCTGGACTGTCCACCAATATCAGAACAGCAGGGCCAATTATGATGGGCGCGGTCAAGAGCAAATTGGAGTTCCACCTGAGTATGCAGAAGCGCGCCAGCTACAACGGCGCCTGC
A_random_48	VDSASPNSKSNLLGFLQYVKQDNYRHDFTFGKLASERLLELIKYKDKVAVWVD				0.0196974	1.33084	0.885882	0.0232934	0.0143804	0.022815	1.41373	1.19984	1.3896	0.0105219	0.93906	-0.256563	0.0136914	0.00808615	1.07681	0.818931	GTGGACTCCGCTTCACCCAACTCTAAGAGTAACCTGCTCGGGTTCCTCCAGTATGTGAAACAGGATAATTACAGGCACGACTTTACCTTCGGCAAACTGGCAAGCGAAAGATTGCTGGAGCTGATCAAGTACAAGGATAAGGTTGCCGTGTGGGTCGAC
A_random_49	SPLNLTVLKHTFEKAQVEEGIRSEQSPCRYSRAFVGADCFSIVELGIFMGNSR				0.0167335	1.13059	0.380432	0.0175527	0.0160661	0.0166153	1.06531	1.34048	1.01199	0.0145351	1.29723	1.06186	0.0169168	0.0124888	1.33048	1.26481	TCCCCTCTCAATCTGACAGTGTTGAAGCACACCTTCGAGAAAGCACAGGTTGAGGAAGGTATTAGGTCAGAACAGTCTCCCTGTCGCTACAGCAGAGCCTTTGTCGGAGCTGACTGCTTCAGTATCGTGGAGCTGGGGATCTTCATGGGCAACTCCCGG
A_random_5	FKDDEITSSTKVRLSSDEIILIGDFAAYKPNTDSETKSASVTPGKEKIGNDNC				0.014169	0.957315	-0.135212	0.0142484	0.0113316	0.017618	0.864768	0.945453	1.07306	0.00825048	0.736338	-1.24888	0.0100534	0.00677089	0.790686	0.685726	TTCAAGGACGACGAGATCACCTCTAGTACCAAAGTCAGACTGAGCAGCGATGAGATAATCCTCATTGGAGACTTTGCCGCATACAAGCCCAATACAGATTCAGAAACGAAATCCGCTTCCGTGACTCCTGGGAAGGAGAAGATCGGCAACGACAACTGC
A_random_50	YNPNYDTLSISSTCAVRKGNSLECSKEYFTDHELNYMSLEPRVERGYSDFKQI				0.025926	1.75167	1.73751	0.0282429	0.0214336	0.0287873	1.71412	1.78832	1.75336	0.0122747	1.09549	0.372142	0.0136628	0.0110276	1.07456	1.11683	TACAACCCCAACTACGATACCTTGTCTATTTCCAGTACTTGTGCCGTCAGAAAAGGGAACTCACTGGAATGCAGCAAGGAGTACTTTACAGACCACGAGCTGAATTATATGTCCCTCGAACCAAGGGTGGAGCGCGGCTATAGCGACTTCAAGCAGATC
A_random_6	QCADIDNPRRFLIRSLKDNSKNAYPKDVTKLFRRVYMIPFFGTSKSLDTNEIL				0.0106263	0.717956	-1.02703	0.0114754	0.00837257	0.0124886	0.696468	0.698568	0.760647	0.0113522	1.01317	0.0533697	0.0133536	0.00965081	1.05025	0.977392	CAGTGCGCTGACATTGACAATCCCAGAAGGTTCCTGATCCGGAGCCTCAAAGATAACTCTAAGAACGCCTACCCAAAAGATGTCACAAAGCTGTTTCGCCGCGTGTATATGATCCCTTTCTTCGGCACTAGTAAGTCCTTGGACACCAACGAGATACTG
A_random_7	GFSWKLGDINAMKTAAVHCESGKLPDPSKLVALLLLSRLSNKEAIKTRNNTLS				0.0127989	0.864747	-0.45042	0.0153367	0.0121882	0.0112162	0.930814	1.01693	0.683147	0.0118776	1.06005	0.237963	0.0141882	0.00994326	1.11589	1.00701	GGGTTCTCCTGGAAGCTGGGCGACATTAACGCCATGAAGACTGCAGCGGTCCACTGCGAATCTGGAAAACTGCCTGATCCCTCAAAACTGGTGGCTCTGCTCCTCTTGAGTAGACTGAGCAATAAGGAGGCCATCAAGACAAGGAACAACACCCTCTCC
A_random_8	RAAYNSASALDCWTEAPSIRVRAPEMYPGCGGTATAQSQMIQDVVKKFICQSG				0.0157042	1.06104	0.183651	0.0203759	0.014084	0.013496	1.23666	1.1751	0.822001	0.0102994	0.919198	-0.34379	0.0109484	0.00968881	0.861079	0.98124	CGCGCGGCCTACAACTCCGCCTCTGCTCTGGATTGCTGGACCGAGGCACCAAGCATTAGAGTGAGGGCTCCTGAAATGTATCCCGGATGTGGCGGGACTGCCACAGCCCAAAGTCAGATGATCCAGGACGTCGTGAAAAAGTTCATCTGCCAGTCAGGC
A_random_9	FDVAPSQSQSRRTLISRDTPDPAREIAIQPLSNNFQVDTYETRMTRTSGHLAL				0.0114247	0.771902	-0.802466	0.011417	0.010698	0.012209	0.692924	0.892592	0.743615	0.00998381	0.891035	-0.470765	0.0125173	0.00796313	0.984467	0.806471	TTCGACGTGGCCCCGTCCCAGTCTCAGAGTCGGAGGACCTTGATTAGCAGAGATACGCCAGATCCTGCCCGGGAAATCGCAATCCAACCCCTCTCAAATAACTTTCAGGTCGACACTTACGAGACACGCATGACCCGCACCAGCGGCCACCTGGCTCTG
A_tiles_P03069:0	MSEYQPSLFALNPMGFSPLDGSKSTNENVSASTSTAKPMVGQLIFDKFIKTEE	GCN4	P03069	0	0.0132449	0.894885	-0.344238	0.0150556	0.00922284	0.0167335	0.913757	0.76951	1.01919	0.00824938	0.73624	-1.24942	0.00958167	0.00710233	0.753587	0.719293	ATGTCCGAGTACCAGCCCTCATTGTTCGCTCTGAACCCAATGGGATTTAGCCCTCTCGATGGGAGCAAATCCACCAACGAAAATGTGAGTGCCTCTACATCTACTGCAAAACCGATGGTCGGCCAGCTGATTTTCGACAAGTTCATCAAGACGGAGGAG
A_tiles_P03069:101	TDSTPMFEYENLEDNSKEWTSLFDNDIPVTTDDVSLADKAIESTEEVSLVPSN	GCN4	P03069	101	0.0389395	2.63091	2.99829	0.0367856	0.0345245	0.0464905	2.2326	2.88056	2.83161	0.0130497	1.16466	0.621975	0.0134937	0.0126203	1.06126	1.27813	ACGGACTCCACCCCCATGTTTGAGTACGAGAACCTGGAGGACAATAGCAAGGAATGGACATCTTTGTTCGACAACGACATCCCTGTGACCACTGATGATGTTAGTCTGGCTGATAAAGCCATTGAATCCACCGAAGAGGTCTCACTCGTGCCAAGCAAC
A_tiles_P03069:114	DNSKEWTSLFDNDIPVTTDDVSLADKAIESTEEVSLVPSNLEVSTTSFLPTPV	GCN4	P03069	114	0.0218076	1.47341	1.20133	0.0214405	0.0206793	0.0233912	1.30127	1.72538	1.42469	0.00898419	0.801821	-0.901244	0.0103574	0.00779303	0.814598	0.789244	GACAACTCCAAGGAGTGGACCTCCTTGTTTGACAACGACATTCCGGTCACAACTGACGATGTCTCCCTCGCTGATAAAGCCATCGAGAGTACCGAAGAAGTGAGCCTGGTGCCATCTAATCTGGAGGTGAGCACCACGTCATTCCTGCCTACACCCGTT
A_tiles_P03069:127	IPVTTDDVSLADKAIESTEEVSLVPSNLEVSTTSFLPTPVLEDAKLTQTRKVK	GCN4	P03069	127	0.00912502	0.616525	-1.49912	0.00834983	0.00860563	0.010574	0.506769	0.718013	0.644034	0.00907464	0.809894	-0.860368	0.0095289	0.00864204	0.749436	0.875229	ATCCCGGTGACCACGGACGACGTGTCTCTCGCTGATAAAGCCATTGAGTCAACTGAAGAAGTTTCCCTGGTCCCATCCAACTTGGAGGTGAGCACAACCAGTTTCCTGCCCACTCCTGTGCTCGAGGACGCAAAGCTGACACAGACCCGGAAGGTCAAG
A_tiles_P03069:13	MGFSPLDGSKSTNENVSASTSTAKPMVGQLIFDKFIKTEEDPIIKQDTPSNLD	GCN4	P03069	13	0.0101143	0.683368	-1.18007	0.00890257	0.0109488	0.0106153	0.540315	0.913512	0.64655	0.00902987	0.805897	-0.880552	0.00907011	0.0089898	0.713353	0.910448	ATGGGGTTCAGCCCTCTGGATGGATCTAAGTCCACCAACGAAAATGTCAGCGCTTCCACTTCAACAGCCAAACCAATGGTGGGCCAGCTGATCTTTGACAAGTTCATTAAAACCGAGGAGGATCCCATCATAAAGCAGGACACGCCGAGTAACCTCGAC
A_tiles_P03069:139	KAIESTEEVSLVPSNLEVSTTSFLPTPVLEDAKLTQTRKVKKPNSVVKKSHHV	GCN4	P03069	139	0.0117154	0.791539	-0.724599	0.0105344	0.00945972	0.0161353	0.639358	0.789274	0.982756	0.0103075	0.919928	-0.340552	0.0102126	0.0104034	0.80321	1.05361	AAGGCCATCGAGAGCACCGAGGAGGTGAGTCTGGTGCCCTCTAACCTCGAAGTGTCCACCACTTCATTCCTGCCAACGCCGGTTTTGGAAGACGCTAAACTGACACAGACCAGAAAAGTGAAGAAGCCTAATTCCGTGGTCAAGAAAAGCCATCACGTC
A_tiles_P03069:152	SNLEVSTTSFLPTPVLEDAKLTQTRKVKKPNSVVKKSHHVGKDDESRLDHLGV	GCN4	P03069	152	0.00978199	0.660913	-1.28363	0.0104335	0.00857924	0.0104569	0.633232	0.715812	0.6369	0.00883106	0.788155	-0.971391	0.0101249	0.00770253	0.796314	0.780078	AGCAACCTGGAGGTGAGTACCACTTCTTTCCTGCCAACCCCTGTCCTCGAAGATGCCAAATTGACACAGACGAGAAAGGTCAAGAAGCCCAATAGCGTGGTGAAGAAATCACATCACGTTGGAAAAGACGACGAGTCCCGCCTCGACCACCTGGGCGTG
A_tiles_P03069:165	PVLEDAKLTQTRKVKKPNSVVKKSHHVGKDDESRLDHLGVVAYNRKQRSIPLS	GCN4	P03069	165	0.0177144	1.19686	0.556985	0.0197214	0.0172308	0.0163581	1.19694	1.43766	0.996323	0.0132061	1.17862	0.670595	0.0164767	0.0105848	1.29587	1.07198	CCCGTGCTGGAGGACGCTAAGTTGACCCAGACACGGAAGGTGAAGAAACCAAACTCCGTCGTTAAGAAAAGTCACCACGTCGGCAAAGACGATGAATCAAGGCTCGATCATCTGGGAGTGGTGGCCTACAATCGCAAGCAGAGATCTATCCCTCTGAGC
A_tiles_P03069:177	KVKKPNSVVKKSHHVGKDDESRLDHLGVVAYNRKQRSIPLSPIVPESSDPAAL	GCN4	P03069	177	0.0152349	1.02934	0.0896194	0.0155713	0.013554	0.0167543	0.945057	1.13088	1.02046	0.0114912	1.02556	0.103002	0.0137347	0.00961409	1.08022	0.973673	AAGGTGAAGAAGCCAAACTCCGTGGTTAAGAAATCACACCACGTCGGGAAAGACGATGAATCTAGGCTCGATCATCTGGGCGTGGTGGCCTACAATAGAAAACAGCGCTCCATTCCTTTGAGTCCCATCGTCCCGGAGAGCAGCGACCCCGCAGCTCTG
A_tiles_P03069:190	HVGKDDESRLDHLGVVAYNRKQRSIPLSPIVPESSDPAALKRARNTEAARRSR	GCN4	P03069	190	0.0116572	0.787609	-0.74003	0.0111745	0.0103367	0.0137142	0.678203	0.862446	0.835294	0.0108381	0.967277	-0.135757	0.0132756	0.00884815	1.04411	0.896102	CACGTGGGCAAGGACGACGAGTCTCGGCTGGATCATCTGGGAGTCGTGGCATACAATCGGAAACAGCGCAGTATTCCACTCTCACCCATCGTTCCTGAATCCAGCGATCCGGCTGCCTTGAAGAGAGCGAGAAACACCGAGGCCGCCAGGAGGAGCCGC
A_tiles_P03069:203	GVVAYNRKQRSIPLSPIVPESSDPAALKRARNTEAARRSRARKLQRMKQLEDK	GCN4	P03069	203	0.0156018	1.05413	0.163385	0.0154012	0.0131097	0.0188096	0.934733	1.09381	1.14564	0.0133855	1.19463	0.725635	0.0149828	0.0119584	1.17838	1.2111	GGCGTGGTCGCCTACAACAGGAAGCAAAGGTCCATCCCCTTGAGCCCGATTGTGCCTGAGTCTTCAGATCCAGCGGCTCTGAAAAGAGCTCGCAATACCGAAGCAGCCAGACGGAGTCGCGCCCGGAAACTCCAGCGCATGAAGCAGCTGGAGGACAAG
A_tiles_P03069:215	PLSPIVPESSDPAALKRARNTEAARRSRARKLQRMKQLEDKVEELLSKNYHLE	GCN4	P03069	215	0.0125762	0.849703	-0.504819	0.0127863	0.0105182	0.0147899	0.776027	0.877587	0.900811	0.0134064	1.1965	0.732022	0.0135252	0.0132887	1.06374	1.34582	CCCCTGTCCCCTATCGTGCCGGAGTCTAGTGATCCAGCCGCCCTCAAGCGGGCTCGGAATACCGAAGCAGCGAGACGCTCAAGGGCCAGGAAACTGCAGCGCATGAAACAGCTGGAAGACAAGGTCGAGGAGTTGCTCAGCAAGAACTACCACCTGGAG
A_tiles_P03069:228	ALKRARNTEAARRSRARKLQRMKQLEDKVEELLSKNYHLENEVARLKKLVGER	GCN4	P03069	228	0.0335998	2.27014	2.54114	0.0368869	0.0295808	0.0347637	2.23874	2.46808	2.11736	0.0255315	2.27864	3.36055	0.0263852	0.0247055	2.07516	2.50207	GCCCTGAAGCGCGCCAGAAACACCGAGGCCGCGAGGCGCAGCAGGGCTAGAAAACTGCAGCGGATGAAGCAGCTCGAAGACAAGGTGGAAGAGCTGCTGTCCAAAAATTACCACTTGGAAAACGAGGTGGCACGCCTCAAAAAGCTGGTCGGCGAGCGG
A_tiles_P03069:25	NENVSASTSTAKPMVGQLIFDKFIKTEEDPIIKQDTPSNLDFDFALPQTATAP	GCN4	P03069	25	0.0189215	1.27842	0.761317	0.0183352	0.0173723	0.0212678	1.1128	1.44946	1.29536	0.00802524	0.716236	-1.36182	0.00956632	0.00673242	0.752379	0.68183	AACGAGAACGTGTCTGCCTCCACTAGCACCGCTAAACCCATGGTCGGCCAACTCATTTTCGACAAGTTTATCAAGACGGAGGAAGACCCCATCATAAAGCAGGATACCCCAAGTAATCTGGATTTCGACTTCGCGCTGCCGCAGACAGCAACCGCCCCT
A_tiles_P03069:38	MVGQLIFDKFIKTEEDPIIKQDTPSNLDFDFALPQTATAPDAKTVLPIPELDD	GCN4	P03069	38	0.0218939	1.47925	1.21357	0.021571	0.0177891	0.0273494	1.30919	1.48424	1.66577	0.00794367	0.708956	-1.40351	0.00881217	0.00716076	0.693066	0.725211	ATGGTGGGCCAGCTGATATTCGACAAGTTCATCAAGACCGAAGAGGACCCCATTATCAAACAGGACACGCCTAGCAACCTCGATTTTGATTTTGCACTGCCACAAACCGCTACTGCCCCTGATGCCAAGACAGTCCTGCCGATCCCCGAGTTGGACGAC
A_tiles_P03069:51	EEDPIIKQDTPSNLDFDFALPQTATAPDAKTVLPIPELDDAVVESFFSSSTDS	GCN4	P03069	51	0.0299116	2.02095	2.18074	0.0307262	0.0284049	0.030663	1.86484	2.36997	1.8676	0.0104838	0.935661	-0.271358	0.0101558	0.0108225	0.798741	1.09605	GAGGAGGACCCCATTATCAAGCAGGACACGCCTAGCAACCTCGACTTTGATTTTGCATTGCCTCAGACTGCGACAGCTCCAGATGCCAAAACCGTGCTGCCCATCCCGGAACTGGATGACGCCGTGGTCGAGTCCTTCTTCAGTTCTAGCACCGACTCC
A_tiles_P03069:63	NLDFDFALPQTATAPDAKTVLPIPELDDAVVESFFSSSTDSTPMFEYENLEDN	GCN4	P03069	63	0.115263	7.78767	6.36195	0.117165	0.106805	0.122372	7.11101	8.91132	7.45332	0.0142661	1.27322	0.985624	0.0161947	0.0125672	1.27369	1.27275	AACCTGGACTTCGACTTTGCGCTCCCTCAGACTGCCACCGCTCCCGATGCAAAGACGGTGTTGCCAATCCCCGAACTGGATGATGCCGTGGTCGAAAGTTTCTTTTCTTCATCCACAGACAGCACCCCGATGTTCGAGTACGAGAATCTGGAGGACAAC
A_tiles_P03069:76	APDAKTVLPIPELDDAVVESFFSSSTDSTPMFEYENLEDNSKEWTSLFDNDIP	GCN4	P03069	76	0.0705682	4.76789	4.84119	0.0703075	0.0581126	0.0860114	4.26711	4.84864	5.23871	0.0190073	1.69636	2.15646	0.0198185	0.0182293	1.5587	1.84619	GCCCCGGACGCTAAGACGGTGCTGCCCATCCCTGAGTTGGATGATGCAGTCGTGGAAAGCTTTTTCTCATCCAGCACAGATTCTACCCCCATGTTCGAGTACGAGAATCTGGAAGACAACAGTAAAGAGTGGACTTCCCTCTTCGACAACGACATTCCA
A_tiles_P03069:89	DDAVVESFFSSSTDSTPMFEYENLEDNSKEWTSLFDNDIPVTTDDVSLADKAI	GCN4	P03069	89	0.104576	7.06558	6.06035	0.0921222	0.101206	0.122666	5.59109	8.44413	7.47124	0.013403	1.19619	0.73097	0.0150456	0.0119397	1.18332	1.2092	GACGACGCAGTCGTGGAGTCCTTCTTTTCCAGTTCAACCGATAGCACACCTATGTTCGAATACGAGAACCTGGAGGACAACTCTAAGGAATGGACTTCCCTGTTCGATAATGATATTCCCGTGACCACGGACGACGTTAGCCTCGCTGACAAAGCCATC
A_tiles_P04386:0	MKLLSSIEQACDICRLKKLKCSKEKPKCAKCLKNNWECRYSPKTKRSPLTRAH	GAL4	P04386	0	0.0238898	1.61409	1.48398	0.0232667	0.0192859	0.0303852	1.4121	1.60912	1.85068	0.0127686	1.13957	0.53312	0.0180861	0.00901449	1.42245	0.912949	ATGAAGCTCCTGTCTTCAATCGAACAGGCTTGCGACATTTGTAGGCTCAAGAAACTGAAGTGCTCCAAGGAGAAGCCTAAATGCGCAAAGTGCTTGAAGAACAATTGGGAGTGTCGGTACAGTCCCAAAACAAAAAGAAGCCCACTGACCCGCGCCCAC
A_tiles_P04386:104	DAVTDRLASVETDMPLTLRQHRISATSSSEESSNKGQRQLTVSIDSAAHHDNS	GAL4	P04386	104	0.0108365	0.73216	-0.966304	0.0115371	0.0100658	0.0109578	0.700213	0.839842	0.667406	0.00759574	0.677905	-1.58626	0.0065846	0.00876216	0.517871	0.887393	GACGCGGTGACGGACCGCCTGGCTTCCGTGGAGACCGATATGCCCCTCACATTGAGACAGCATAGGATCAGCGCAACTAGCAGTTCTGAGGAATCCTCAAATAAGGGCCAACGGCAGCTGACCGTCAGCATTGATTCTGCCGCCCACCACGACAACTCC
A_tiles_P04386:116	DMPLTLRQHRISATSSSEESSNKGQRQLTVSIDSAAHHDNSTIPLDFMPRDAL	GAL4	P04386	116	0.0116195	0.785059	-0.750079	0.0124911	0.00861054	0.0145856	0.758114	0.718423	0.888367	0.00761485	0.67961	-1.57601	0.00878065	0.00660383	0.690587	0.668807	GACATGCCCCTGACGCTGAGACAGCACAGGATCTCAGCCACAAGCAGCAGCGAAGAGTCTTCCAATAAGGGCCAGCGCCAATTGACCGTGTCCATTGATTCCGCAGCTCACCATGATAACAGTACTATCCCACTGGACTTCATGCCTCGGGACGCCCTC
A_tiles_P04386:129	TSSSEESSNKGQRQLTVSIDSAAHHDNSTIPLDFMPRDALHGFDWSEEDDMSD	GAL4	P04386	129	0.0361237	2.44067	2.76564	0.0360393	0.032207	0.0406118	2.1873	2.6872	2.47355	0.0111274	0.993097	-0.0282636	0.013185	0.00939086	1.03699	0.951065	ACCTCCTCCAGCGAGGAGTCATCTAACAAGGGGCAGCGCCAGCTCACAGTGTCTATTGATAGCGCTGCACATCACGACAATAGCACTATCCCCCTGGATTTTATGCCTAGAGATGCCCTGCACGGCTTCGACTGGTCCGAAGAGGACGACATGAGTGAC
A_tiles_P04386:13	CRLKKLKCSKEKPKCAKCLKNNWECRYSPKTKRSPLTRAHLTEVESRLERLEQ	GAL4	P04386	13	0.0112197	0.758048	-0.858603	0.010957	0.00986591	0.013065	0.665004	0.823165	0.795754	0.0152568	1.36164	1.2596	0.017116	0.0135996	1.34615	1.37731	TGCCGGTTGAAGAAGCTCAAGTGCAGTAAGGAGAAACCCAAATGTGCTAAGTGCCTGAAGAACAATTGGGAGTGTCGCTACTCTCCTAAAACAAAACGGTCCCCACTGACTAGGGCCCACCTGACCGAAGTGGAAAGCAGACTCGAGCGCCTGGAGCAG
A_tiles_P04386:142	QLTVSIDSAAHHDNSTIPLDFMPRDALHGFDWSEEDDMSDGLPFLKTDPNNNG	GAL4	P04386	142	0.0531844	3.59336	3.9646	0.0498366	0.047654	0.0633439	3.02469	3.97602	3.8581	0.0103474	0.923485	-0.324803	0.0124627	0.00859118	0.980172	0.870077	CAGCTGACCGTGTCCATCGACAGTGCTGCACACCACGACAATAGCACTATTCCTCTGGATTTCATGCCCAGAGATGCCCTCCATGGGTTTGATTGGTCAGAGGAAGACGACATGTCTGACGGACTGCCATTCTTGAAGACAGACCCGAACAACAACGGC
A_tiles_P04386:155	NSTIPLDFMPRDALHGFDWSEEDDMSDGLPFLKTDPNNNGFFGDGSLLCILRS	GAL4	P04386	155	0.0665411	4.49579	4.65906	0.0854917	0.0505266	0.0682064	5.18867	4.2157	4.15426	0.0176077	1.57145	1.84436	0.0199484	0.0155417	1.56892	1.57399	AACAGTACAATCCCTCTGGACTTCATGCCCCGCGACGCCTTGCACGGATTTGATTGGAGCGAAGAGGATGATATGTCAGACGGCCTGCCATTTCTGAAGACCGACCCGAATAACAACGGGTTCTTCGGTGACGGCTCCCTCCTCTGCATTCTGCGGTCT
A_tiles_P04386:168	LHGFDWSEEDDMSDGLPFLKTDPNNNGFFGDGSLLCILRSIGFKPENYTNSNV	GAL4	P04386	168	0.0472048	3.18935	3.59491	0.060721	0.0385019	0.0449921	3.68528	3.21242	2.74034	0.0238115	2.12513	3.07596	0.0281565	0.020137	2.21448	2.03939	TTGCACGGCTTCGACTGGAGCGAGGAGGACGACATGTCCGATGGACTCCCATTTCTGAAAACAGACCCCAATAATAACGGGTTCTTTGGTGATGGGTCACTGCTCTGCATTCTGAGATCTATCGGCTTCAAGCCTGAAAACTACACCAACAGTAACGTG
A_tiles_P04386:181	DGLPFLKTDPNNNGFFGDGSLLCILRSIGFKPENYTNSNVNRLPTMITDRYTL	GAL4	P04386	181	0.0174983	1.18226	0.518944	0.0207569	0.0131057	0.0196953	1.25978	1.09348	1.19958	0.0161466	1.44105	1.49087	0.0158908	0.0164064	1.24979	1.66157	GACGGTCTGCCCTTCCTGAAGACTGACCCGAATAACAATGGCTTCTTTGGAGATGGGTCTTTGCTGTGCATTCTCCGCAGCATCGGCTTTAAACCTGAGAACTACACAAATTCCAACGTGAACCGGCTGCCAACGATGATCACCGACAGGTATACCCTC
A_tiles_P04386:194	GFFGDGSLLCILRSIGFKPENYTNSNVNRLPTMITDRYTLASRSTTSRLLQSY	GAL4	P04386	194	0.0115293	0.778969	-0.774217	0.0111476	0.00985388	0.0139516	0.676569	0.822161	0.849751	0.009343	0.833844	-0.74145	0.0141882	0.00615239	1.11589	0.623088	GGCTTCTTCGGCGACGGGTCACTGCTCTGCATTCTCCGCTCTATCGGATTTAAGCCTGAGAACTACACCAACAGCAACGTGAATAGGTTGCCCACTATGATCACAGATCGGTATACCCTGGCCTCCCGCAGCACCACGTCCAGACTGCTGCAGAGTTAC
A_tiles_P04386:207	SIGFKPENYTNSNVNRLPTMITDRYTLASRSTTSRLLQSYLNNFHPYCPIVHS	GAL4	P04386	207	0.0257897	1.74246	1.72117	0.0332583	0.0209364	0.0246341	2.01852	1.74683	1.50039	0.0163112	1.45574	1.53227	0.0204081	0.0130367	1.60508	1.3203	TCCATCGGCTTCAAGCCAGAGAACTACACCAACTCAAACGTCAATCGGCTCCCTACTATGATTACGGACAGATATACCTTGGCCAGTAGGAGCACAACCTCTCGCCTGCTGCAGTCCTACCTGAATAACTTTCATCCGTACTGCCCCATCGTGCACAGC
A_tiles_P04386:220	VNRLPTMITDRYTLASRSTTSRLLQSYLNNFHPYCPIVHSPTLMMLYNNQIEI	GAL4	P04386	220	0.0135483	0.915379	-0.274054	0.0155821	0.0101637	0.0157027	0.945707	0.848015	0.956406	0.0121368	1.08319	0.326065	0.0122408	0.0120337	0.962727	1.21872	GTGAACCGCCTGCCTACCATGATTACGGACAGATACACATTGGCCAGCAGGAGTACTACCTCCCGGCTCCTGCAGTCATACCTCAATAATTTCCATCCATATTGCCCGATAGTCCACTCTCCCACCCTGATGATGCTGTACAACAACCAGATCGAGATC
A_tiles_P04386:233	LASRSTTSRLLQSYLNNFHPYCPIVHSPTLMMLYNNQIEIASKDQWQILFNCI	GAL4	P04386	233	0.0175903	1.18848	0.53521	0.0201541	0.0146233	0.0184678	1.22319	1.2201	1.12482	0.0140022	1.24967	0.90944	0.0142641	0.0137451	1.12186	1.39204	CTGGCTTCCCGCAGTACTACCTCTCGGCTGTTGCAGTCCTACCTCAATAACTTTCATCCATACTGTCCCATTGTGCACAGCCCTACACTGATGATGCTGTATAACAATCAGATCGAGATAGCCAGCAAGGACCAATGGCAGATCCTCTTCAACTGCATC
A_tiles_P04386:246	YLNNFHPYCPIVHSPTLMMLYNNQIEIASKDQWQILFNCILAIGAWCIEGEST	GAL4	P04386	246	0.0286208	1.93374	2.04401	0.0307165	0.0207971	0.0367002	1.86425	1.73521	2.23531	0.0193867	1.73023	2.23711	0.0218486	0.0172023	1.71836	1.74218	TATCTGAACAACTTCCATCCTTACTGCCCAATTGTGCACTCTCCCACACTCATGATGTTGTACAATAACCAGATCGAGATCGCTTCCAAGGACCAGTGGCAAATTCTGTTTAATTGTATACTGGCCATCGGGGCATGGTGCATCGAAGGCGAGAGCACC
A_tiles_P04386:259	SPTLMMLYNNQIEIASKDQWQILFNCILAIGAWCIEGESTDIDVFYYQNAKSH	GAL4	P04386	259	0.0171762	1.1605	0.461359	0.015787	0.0155687	0.0206171	0.958147	1.29898	1.25573	0.0118858	1.06078	0.240776	0.0113506	0.0124462	0.89271	1.2605	TCCCCTACCCTCATGATGCTGTATAACAATCAGATCGAGATCGCTAGCAAAGACCAGTGGCAGATCCTGTTTAACTGTATTTTGGCCATTGGGGCATGGTGCATAGAAGGCGAGTCTACAGATATCGACGTGTTCTACTACCAAAACGCCAAGAGTCAC
A_tiles_P04386:26	KCAKCLKNNWECRYSPKTKRSPLTRAHLTEVESRLERLEQLFLLIFPREDLDM	GAL4	P04386	26	0.0122209	0.825696	-0.593653	0.0175184	0.00952205	0.0109417	1.06323	0.794474	0.666429	0.0142475	1.27156	0.98029	0.0153627	0.0132132	1.20825	1.33817	AAGTGCGCCAAGTGCCTGAAGAACAATTGGGAGTGTCGCTACAGCCCCAAAACAAAACGGTCCCCTCTGACTAGAGCTCACTTGACCGAAGTGGAGTCTAGGCTCGAACGCCTGGAGCAGCTGTTTCTGCTCATCTTCCCACGGGAGGATCTCGACATG
A_tiles_P04386:272	IASKDQWQILFNCILAIGAWCIEGESTDIDVFYYQNAKSHLTSKVFESGSIIL	GAL4	P04386	272	0.012202	0.824421	-0.59844	0.0120945	0.0112661	0.0133333	0.734039	0.93999	0.812092	0.0136025	1.214	0.791272	0.0141882	0.013041	1.11589	1.32073	ATCGCATCCAAGGACCAGTGGCAAATCCTGTTTAACTGTATTCTCGCCATAGGGGCTTGGTGCATTGAAGGAGAGAGCACAGATATCGACGTCTTCTATTACCAGAATGCCAAGTCTCACCTGACCTCCAAAGTGTTCGAGAGCGGCAGTATCATCTTG
A_tiles_P04386:285	ILAIGAWCIEGESTDIDVFYYQNAKSHLTSKVFESGSIILVTALHLLSRYTQW	GAL4	P04386	285	0.0150008	1.01352	0.0416105	0.015635	0.0129231	0.0167061	0.948922	1.07824	1.01752	0.0127027	1.13369	0.512005	0.014792	0.0109085	1.16337	1.10477	ATCCTGGCTATCGGCGCCTGGTGCATTGAGGGAGAGAGTACAGATATAGACGTGTTCTATTACCAGAACGCCAAGTCCCACTTGACCAGCAAAGTGTTTGAATCAGGGTCTATCATTCTGGTCACTGCACTCCATCTGCTCAGCCGCTACACGCAGTGG
A_tiles_P04386:298	TDIDVFYYQNAKSHLTSKVFESGSIILVTALHLLSRYTQWRQKTNTSYNFHSF	GAL4	P04386	298	0.0135218	0.913591	-0.280112	0.0144214	0.01192	0.0143821	0.875266	0.994549	0.875971	0.0130415	1.16392	0.619397	0.0136495	0.0124605	1.07351	1.26195	ACCGACATCGATGTGTTCTACTATCAGAACGCCAAGTCCCACTTGACTAGCAAAGTGTTCGAGTCTGGCTCCATTATCCTGGTCACAGCTCTCCATCTGCTGAGTAGATACACCCAATGGCGCCAGAAGACCAATACGAGCTACAACTTTCACTCATTC
A_tiles_P04386:310	SHLTSKVFESGSIILVTALHLLSRYTQWRQKTNTSYNFHSFSIRMAISLGLNR	GAL4	P04386	310	0.0120835	0.816413	-0.628697	0.0100291	0.00849754	0.0207025	0.608688	0.708994	1.26093	0.0161813	1.44415	1.49964	0.0215451	0.0121529	1.6945	1.23079	TCCCACCTGACCAGCAAGGTGTTTGAGAGTGGGTCTATAATTCTCGTCACAGCTCTGCATTTGCTGTCCCGGTATACGCAGTGGCGCCAGAAAACTAACACCAGCTACAATTTCCACTCCTTCAGCATCAGAATGGCCATCTCACTCGGCCTGAACAGG
A_tiles_P04386:323	ILVTALHLLSRYTQWRQKTNTSYNFHSFSIRMAISLGLNRDLPSSFSDSSILE	GAL4	P04386	323	0.00960588	0.649014	-1.33994	0.0101184	0.00654199	0.0133903	0.614106	0.545833	0.815565	0.0112195	1.00132	0.0053819	0.0139349	0.00903327	1.09596	0.914851	ATCCTGGTGACCGCCCTCCATTTGCTGTCTCGGTATACACAGTGGAGACAGAAGACTAACACGTCCTACAACTTCCACAGCTTCTCAATAAGGATGGCTATTAGCCTGGGCCTCAATCGCGATCTGCCCAGCAGTTTTTCCGACTCTTCCATCCTGGAG
A_tiles_P04386:336	QWRQKTNTSYNFHSFSIRMAISLGLNRDLPSSFSDSSILEQRRRIWWSVYSWE	GAL4	P04386	336	0.0144543	0.976591	-0.0734186	0.0173849	0.0119319	0.0145582	1.05513	0.995542	0.886697	0.0124673	1.11268	0.435672	0.011795	0.0131778	0.927666	1.33459	CAGTGGCGCCAGAAGACAAACACCTCCTATAACTTCCACAGCTTCAGCATACGGATGGCCATTAGTCTGGGCCTCAATAGGGATCTGCCCTCTTCATTTTCTGACAGTTCCATCTTGGAACAACGGCGCAGAATCTGGTGGAGCGTGTACTCCTGGGAG
A_tiles_P04386:349	SFSIRMAISLGLNRDLPSSFSDSSILEQRRRIWWSVYSWEIQLSLLYGRSIQL	GAL4	P04386	349	0.00976714	0.659909	-1.28834	0.00883525	0.00714049	0.0147692	0.53623	0.595769	0.899548	0.0118005	1.05317	0.211395	0.0116513	0.0119517	0.916358	1.21041	TCCTTCTCCATCAGAATGGCCATTAGCCTCGGGCTGAACCGGGACCTCCCCTCTAGTTTTTCTGATTCATCCATACTGGAACAACGCCGGAGGATTTGGTGGAGTGTGTATTCCTGGGAGATCCAGTTGAGCCTGCTGTACGGCCGCAGCATCCAGCTG
A_tiles_P04386:362	RDLPSSFSDSSILEQRRRIWWSVYSWEIQLSLLYGRSIQLSQNTISFPSSVDD	GAL4	P04386	362	0.00977986	0.660769	-1.2843	0.00742528	0.0093197	0.0135171	0.450656	0.777591	0.823289	0.0130292	1.16283	0.615548	0.0132729	0.0127899	1.0439	1.29531	CGCGACCTCCCCTCATCTTTCTCTGATTCCTCCATCCTGGAGCAGAGAAGGCGGATATGGTGGAGTGTGTATAGCTGGGAAATTCAACTCAGCCTGCTGTACGGCCGCTCCATCCAGTTGAGCCAGAACACCATCTCCTTTCCTAGTAGCGTCGACGAC
A_tiles_P04386:375	EQRRRIWWSVYSWEIQLSLLYGRSIQLSQNTISFPSSVDDVQRTTTGPTIYHG	GAL4	P04386	375	0.0122624	0.828498	-0.583151	0.0121634	0.0118152	0.01283	0.738223	0.985804	0.781442	0.0112259	1.00189	0.00771108	0.00840785	0.0149885	0.661267	1.51797	GAGCAGCGGAGAAGGATCTGGTGGTCTGTCTACAGCTGGGAAATCCAGCTCAGCCTGTTGTATGGGCGCTCCATACAGCTGTCCCAAAACACTATTTCATTCCCCAGTTCCGTGGATGACGTGCAGCGCACAACGACCGGCCCTACCATCTACCACGGA
A_tiles_P04386:388	EIQLSLLYGRSIQLSQNTISFPSSVDDVQRTTTGPTIYHGIIETARLLQVFTK	GAL4	P04386	388	0.0126636	0.855604	-0.483367	0.0136477	0.0101377	0.014678	0.82831	0.845844	0.893995	0.00921011	0.821984	-0.799905	0.0100534	0.00843757	0.790686	0.85452	GAAATTCAGCTGAGCCTGCTGTACGGACGGTCCATCCAGTTGAGCCAAAACACCATTTCTTTTCCTAGTTCCGTCGACGATGTGCAGAGAACGACAACTGGCCCCACAATATATCACGGGATCATCGAGACCGCCCGCCTCCTCCAGGTGTTCACCAAG
A_tiles_P04386:39	YSPKTKRSPLTRAHLTEVESRLERLEQLFLLIFPREDLDMILKMDSLQDIKAL	GAL4	P04386	39	0.0225161	1.52128	1.30043	0.0271078	0.0197869	0.0212818	1.64523	1.65093	1.29622	0.0229791	2.05084	2.93077	0.0246752	0.0213996	1.94067	2.16726	TACTCCCCAAAGACCAAAAGGAGTCCCCTGACTCGCGCCCACTTGACAGAAGTGGAGTCTCGGCTGGAACGCCTCGAGCAGTTGTTCCTGCTCATTTTTCCTAGAGAGGATCTGGACATGATCCTGAAGATGGACAGCCTCCAGGACATCAAGGCTCTG
A_tiles_P04386:401	LSQNTISFPSSVDDVQRTTTGPTIYHGIIETARLLQVFTKIYELDKTVTAEKS	GAL4	P04386	401	0.0101969	0.688948	-1.15486	0.0121086	0.00996714	0.0087851	0.734894	0.831611	0.535076	0.00992034	0.88537	-0.496789	0.015656	0.00628597	1.23132	0.636616	CTGTCCCAGAACACCATCTCATTTCCTAGCAGTGTGGACGATGTTCAACGCACAACAACTGGACCCACCATATATCACGGCATTATCGAAACCGCTAGACTGCTCCAGGTGTTCACTAAAATCTACGAGTTGGACAAGACGGTCACCGCCGAGAAGTCT
A_tiles_P04386:414	DVQRTTTGPTIYHGIIETARLLQVFTKIYELDKTVTAEKSPICAKKCLMICNE	GAL4	P04386	414	0.0151308	1.0223	0.068368	0.0161506	0.0107341	0.0199818	0.980214	0.8956	1.21704	0.00991283	0.8847	-0.499878	0.0103998	0.0094487	0.817928	0.956924	GACGTGCAGCGCACCACAACAGGGCCTACCATTTACCACGGCATAATCGAAACTGCTAGGCTGCTGCAGGTGTTCACGAAAATCTATGAGCTCGATAAAACTGTCACCGCAGAGAAGAGCCCCATTTGTGCCAAGAAGTGCTTGATGATCTGCAACGAG
A_tiles_P04386:427	GIIETARLLQVFTKIYELDKTVTAEKSPICAKKCLMICNEIEEVSRQAPKFLQ	GAL4	P04386	427	0.0145347	0.982026	-0.056217	0.0162569	0.011525	0.0163886	0.986663	0.961591	0.998182	0.0110239	0.98386	-0.0663938	0.0142732	0.00851429	1.12257	0.86229	GGCATCATCGAGACCGCCCGGCTGTTGCAGGTGTTTACTAAGATATACGAACTGGACAAGACGGTGACAGCCGAAAAGAGCCCTATTTGCGCTAAGAAATGTCTCATGATCTGCAACGAGATTGAGGAGGTCTCCCGCCAAGCACCCAAATTCCTGCAG
A_tiles_P04386:440	KIYELDKTVTAEKSPICAKKCLMICNEIEEVSRQAPKFLQMDISTTALTNLLK	GAL4	P04386	440	0.0234469	1.58417	1.42598	0.0305629	0.0183939	0.0229291	1.85493	1.5347	1.39655	0.00989198	0.882839	-0.508472	0.0115648	0.00846115	0.909554	0.856909	AAGATCTACGAGCTCGATAAAACTGTGACCGCTGAAAAGTCTCCTATCTGTGCCAAAAAGTGCCTGATGATTTGCAACGAGATAGAGGAAGTCTCCAGACAGGCACCCAAATTCTTGCAGATGGACATCAGCACAACGGCCCTCACCAATCTGCTGAAG
A_tiles_P04386:453	SPICAKKCLMICNEIEEVSRQAPKFLQMDISTTALTNLLKEHPWLSFTRFELK	GAL4	P04386	453	0.0147983	0.999838	-0.000500933	0.0166684	0.0124733	0.0155871	1.01164	1.04071	0.949365	0.0154583	1.37962	1.31311	0.0179042	0.0133465	1.40814	1.35167	TCCCCAATCTGCGCCAAGAAGTGCCTGATGATTTGTAATGAGATCGAGGAAGTGAGTCGCCAGGCTCCTAAATTTCTGCAGATGGACATAAGCACAACTGCACTCACCAACCTGCTCAAGGAACACCCCTGGTTGTCTTTCACCCGGTTCGAGCTGAAA
A_tiles_P04386:466	EIEEVSRQAPKFLQMDISTTALTNLLKEHPWLSFTRFELKWKQLSLIIYVLRD	GAL4	P04386	466	0.0135263	0.913893	-0.279087	0.016389	0.0104147	0.014499	0.994685	0.86895	0.883093	0.0111422	0.994417	-0.0228441	0.0113506	0.0109376	0.89271	1.10771	GAGATTGAGGAGGTCAGCAGGCAGGCTCCCAAGTTCCTGCAAATGGATATAAGTACGACTGCCCTGACCAACCTCTTGAAAGAACACCCTTGGCTGTCTTTTACACGCTTCGAACTCAAATGGAAGCAGCTCTCCCTGATCATCTACGTGCTGCGGGAC
A_tiles_P04386:479	QMDISTTALTNLLKEHPWLSFTRFELKWKQLSLIIYVLRDFFTNFTQKKSQLE	GAL4	P04386	479	0.0122221	0.825774	-0.593361	0.0149894	0.0111343	0.0109392	0.909737	0.928995	0.666275	0.0128166	1.14386	0.548436	0.0152797	0.0107506	1.20173	1.08878	CAGATGGACATCAGCACGACCGCCTTGACCAATCTGCTGAAAGAACACCCCTGGCTGTCTTTTACACGCTTTGAGCTGAAATGGAAGCAACTCTCCCTCATTATCTACGTGCTCCGGGATTTCTTCACTAACTTCACCCAGAAGAAGTCACAGCTGGAG
A_tiles_P04386:492	KEHPWLSFTRFELKWKQLSLIIYVLRDFFTNFTQKKSQLEQDQNDHQSYEVKR	GAL4	P04386	492	0.00892954	0.603317	-1.56624	0.00921908	0.00598716	0.0128996	0.559525	0.499541	0.785681	0.0121752	1.08662	0.338955	0.013553	0.0109376	1.06592	1.10771	AAGGAGCACCCCTGGCTGAGTTTCACTAGGTTTGAGCTGAAATGGAAGCAACTGTCTCTCATCATTTACGTGCTCCGCGACTTCTTCACAAACTTTACCCAGAAGAAATCCCAGTTGGAACAGGACCAGAATGATCATCAGAGCTATGAGGTCAAGCGG
A_tiles_P04386:505	KWKQLSLIIYVLRDFFTNFTQKKSQLEQDQNDHQSYEVKRCSIMLSDAAQRTV	GAL4	P04386	505	0.0122663	0.828763	-0.582162	0.0129075	0.00957328	0.0149361	0.783381	0.798749	0.909719	0.0135722	1.2113	0.782178	0.0173734	0.0106028	1.36639	1.0738	AAATGGAAGCAGTTGTCTCTGATCATTTACGTCCTGCGGGATTTCTTCACAAACTTTACGCAGAAGAAGTCCCAACTCGAACAGGACCAGAATGATCACCAAAGCTATGAGGTGAAAAGGTGCAGTATCATGCTGTCAGACGCTGCCCAGCGCACCGTG
A_tiles_P04386:518	DFFTNFTQKKSQLEQDQNDHQSYEVKRCSIMLSDAAQRTVMSVSSYMDNHNVT	GAL4	P04386	518	0.0237734	1.60623	1.46884	0.0277377	0.0217119	0.0223102	1.68346	1.81154	1.35885	0.0080421	0.717742	-1.35326	0.0107302	0.00602743	0.843915	0.610432	GACTTCTTCACGAACTTTACCCAGAAGAAGTCCCAGCTGGAACAGGATCAGAATGACCATCAGTCTTACGAGGTCAAAAGGTGCAGTATCATGCTCTCAGATGCTGCCCAACGCACAGTTATGAGCGTGAGCTCCTATATGGACAACCACAACGTGACT
A_tiles_P04386:52	HLTEVESRLERLEQLFLLIFPREDLDMILKMDSLQDIKALLTGLFVQDNVNKD	GAL4	P04386	52	0.0188231	1.27177	0.745161	0.0230993	0.0129424	0.022308	1.40195	1.07985	1.35872	0.0279398	2.49357	3.72835	0.030016	0.0260072	2.36072	2.63389	CACCTGACAGAGGTCGAGAGCCGGCTGGAGCGCTTGGAACAGCTCTTCCTCCTGATTTTTCCCAGGGAAGACTTGGACATGATCCTGAAGATGGATTCCCTGCAAGATATCAAAGCCCTGCTGACCGGCCTCTTCGTGCAGGACAATGTGAACAAGGAC
A_tiles_P04386:530	LEQDQNDHQSYEVKRCSIMLSDAAQRTVMSVSSYMDNHNVTPYFAWNCSYYLF	GAL4	P04386	530	0.0173065	1.1693	0.484782	0.0238919	0.0133274	0.0162791	1.45005	1.11197	0.991514	0.0156819	1.39958	1.37172	0.0178295	0.013793	1.40227	1.39689	CTCGAGCAGGACCAGAACGACCATCAGAGTTATGAAGTGAAGCGGTGTAGCATCATGCTGTCTGATGCTGCACAACGCACAGTTATGTCAGTCTCCAGCTATATGGACAACCACAATGTGACCCCTTACTTTGCCTGGAACTGCTCCTACTACCTGTTC
A_tiles_P04386:543	KRCSIMLSDAAQRTVMSVSSYMDNHNVTPYFAWNCSYYLFNAVLVPIKTLLSN	GAL4	P04386	543	0.0111494	0.753304	-0.87806	0.012071	0.0110143	0.0104246	0.732612	0.918982	0.634935	0.0119912	1.07019	0.276801	0.0104805	0.0137196	0.82428	1.38946	AAGCGGTGCTCCATCATGCTGTCTGATGCCGCTCAGCGCACAGTTATGAGTGTGAGCTCATATATGGACAATCACAACGTCACTCCCTACTTCGCATGGAACTGTTCCTACTACTTGTTTAATGCCGTGCTCGTGCCTATTAAAACCCTGCTGAGCAAC
A_tiles_P04386:556	TVMSVSSYMDNHNVTPYFAWNCSYYLFNAVLVPIKTLLSNSKSNAENNETAQL	GAL4	P04386	556	0.0091596	0.618861	-1.48739	0.00959815	0.00824186	0.0097144	0.582532	0.687662	0.591677	0.0117171	1.04573	0.182449	0.0111038	0.0123642	0.873304	1.2522	ACGGTGATGTCCGTTTCCAGTTACATGGACAATCACAACGTCACACCTTACTTTGCCTGGAACTGCTCATACTATCTGTTCAATGCAGTGCTCGTGCCCATCAAAACTCTGCTGTCTAATAGCAAGAGCAACGCTGAAAACAACGAGACCGCCCAGTTG
A_tiles_P04386:569	VTPYFAWNCSYYLFNAVLVPIKTLLSNSKSNAENNETAQLLQQINTVLMLLKK	GAL4	P04386	569	0.0113963	0.769983	-0.810182	0.0108985	0.0110099	0.0123351	0.66145	0.918615	0.751298	0.0140515	1.25407	0.923789	0.0192555	0.010254	1.51442	1.03848	GTGACGCCCTACTTCGCCTGGAACTGCAGTTACTATCTGTTTAATGCAGTCCTGGTGCCAATCAAGACACTCCTGTCCAACTCTAAAAGCAACGCTGAGAACAATGAAACTGCCCAACTGCTCCAGCAGATTAACACCGTTCTCATGCTGTTGAAGAAG
A_tiles_P04386:582	FNAVLVPIKTLLSNSKSNAENNETAQLLQQINTVLMLLKKLATFKIQTCEKYI	GAL4	P04386	582	0.0101913	0.688568	-1.15657	0.0104322	0.00930937	0.0108992	0.633153	0.776729	0.663837	0.0136518	1.21839	0.806013	0.0127927	0.0145685	1.00613	1.47544	TTCAACGCCGTGCTGGTGCCCATCAAGACTCTGCTGTCCAACTCTAAAAGCAATGCAGAGAACAACGAAACGGCTCAACTCTTGCAGCAGATAAATACCGTCCTCATGCTGCTCAAAAAGCTGGCCACCTTTAAGATCCAGACATGCGAGAAGTACATT
A_tiles_P04386:595	NSKSNAENNETAQLLQQINTVLMLLKKLATFKIQTCEKYIQVLEEVCAPFLLS	GAL4	P04386	595	0.0133085	0.899177	-0.329405	0.0152366	0.012094	0.0127917	0.924739	1.00907	0.779106	0.0164809	1.47089	1.5745	0.0180044	0.0150863	1.41602	1.52788	AACTCCAAATCTAACGCTGAGAACAATGAGACGGCCCAGTTGCTCCAGCAAATTAATACTGTCCTGATGCTGCTCAAGAAGCTCGCCACCTTCAAGATCCAGACATGTGAAAAATACATCCAGGTGCTGGAAGAGGTGTGCGCACCCTTTCTGCTGAGC
A_tiles_P04386:608	LLQQINTVLMLLKKLATFKIQTCEKYIQVLEEVCAPFLLSQCAIPLPHISYNN	GAL4	P04386	608	0.0112676	0.761288	-0.845383	0.0109884	0.0101884	0.0127777	0.666911	0.850074	0.778255	0.0144224	1.28717	1.03009	0.014877	0.0139817	1.17006	1.41601	CTGCTCCAGCAGATCAATACCGTGCTCATGCTGCTGAAGAAGCTCGCCACATTCAAGATCCAGACTTGCGAGAAATACATTCAGGTCCTGGAAGAGGTGTGTGCACCATTTCTGTTGTCCCAATGCGCTATACCCCTGCCTCACATCAGCTATAACAAC
A_tiles_P04386:621	KLATFKIQTCEKYIQVLEEVCAPFLLSQCAIPLPHISYNNSNGSAIKNIVGSA	GAL4	P04386	621	0.0113047	0.763796	-0.835187	0.00981547	0.00950269	0.015489	0.595721	0.792859	0.943394	0.0105023	0.937314	-0.264156	0.0117536	0.00938432	0.924404	0.950403	AAGCTGGCCACCTTCAAAATCCAGACATGCGAGAAGTACATTCAGGTCTTGGAGGAAGTGTGCGCACCATTTCTCCTGAGCCAATGTGCCATACCTCTGCCCCACATTTCCTATAATAACTCTAACGGGAGTGCGATCAAGAACATCGTGGGCTCAGCT
A_tiles_P04386:634	IQVLEEVCAPFLLSQCAIPLPHISYNNSNGSAIKNIVGSATIAQYPTLPEENV	GAL4	P04386	634	0.0134682	0.909971	-0.292418	0.013388	0.0132834	0.0137375	0.812546	1.1083	0.836712	0.00832683	0.743153	-1.21129	0.0114107	0.00607644	0.897434	0.615395	ATCCAGGTGCTGGAGGAAGTCTGCGCTCCCTTCCTGCTGTCTCAATGTGCCATTCCTTTGCCCCACATCTCCTACAACAACTCAAATGGCAGCGCCATAAAGAATATCGTGGGAAGTGCAACAATTGCGCAGTATCCAACCCTCCCGGAGGAGAACGTT
A_tiles_P04386:647	SQCAIPLPHISYNNSNGSAIKNIVGSATIAQYPTLPEENVNNISVKYVSPGSV	GAL4	P04386	647	0.0103505	0.699325	-1.10852	0.0116334	0.00873891	0.0109075	0.706052	0.729133	0.664345	0.00974382	0.869616	-0.57005	0.00832669	0.0114021	0.654884	1.15476	TCCCAGTGCGCCATTCCGCTGCCTCACATCTCTTACAACAATAGCAACGGGTCCGCAATCAAGAATATTGTGGGATCCGCTACAATAGCCCAGTATCCAACCCTCCCCGAAGAGAATGTGAACAACATCAGCGTTAAATACGTCAGTCCCGGCTCAGTG
A_tiles_P04386:65	QLFLLIFPREDLDMILKMDSLQDIKALLTGLFVQDNVNKDAVTDRLASVETDM	GAL4	P04386	65	0.0310533	2.09809	2.29685	0.0422929	0.0282022	0.0251057	2.56685	2.35306	1.52912	0.0237001	2.11518	3.05682	0.0272709	0.0205968	2.14482	2.08595	CAGCTGTTCCTGCTGATCTTCCCCAGGGAAGACCTGGATATGATTCTGAAAATGGATAGCCTCCAGGACATCAAGGCTCTCCTCACCGGCTTGTTTGTTCAAGATAATGTCAACAAGGACGCAGTGACAGACCGCCTGGCCTCCGTGGAGACTGACATG
A_tiles_P04386:660	NSNGSAIKNIVGSATIAQYPTLPEENVNNISVKYVSPGSVGPSPVPLKSGASF	GAL4	P04386	660	0.0107012	0.72302	-1.00524	0.00992302	0.00895807	0.0137861	0.602249	0.747419	0.839675	0.00671999	0.599746	-2.08612	0.00684569	0.0065966	0.538405	0.668075	AACTCCAACGGCAGCGCCATTAAGAACATCGTGGGTTCCGCTACCATAGCACAGTATCCTACACTGCCCGAAGAGAATGTCAATAACATCAGCGTGAAATACGTCTCACCTGGGTCTGTGGGACCCTCCCCAGTTCCGCTCAAGAGTGGCGCCAGCTTC
A_tiles_P04386:673	ATIAQYPTLPEENVNNISVKYVSPGSVGPSPVPLKSGASFSDLVKLLSNRPPS	GAL4	P04386	673	0.014649	0.989746	-0.0319479	0.0158604	0.0114828	0.0172607	0.962598	0.958073	1.0513	0.00884123	0.789062	-0.966696	0.01072	0.00729172	0.843115	0.738474	GCCACCATCGCACAGTACCCTACATTGCCGGAGGAAAACGTCAACAATATTTCCGTGAAGTATGTGAGCCCCGGAAGCGTCGGGCCATCACCAGTGCCTCTGAAATCCGGCGCTTCTTTCAGTGACCTGGTTAAGCTGCTCAGCAACAGGCCCCCCTCC
A_tiles_P04386:686	VNNISVKYVSPGSVGPSPVPLKSGASFSDLVKLLSNRPPSRNSPVTIPRSTPS	GAL4	P04386	686	0.0122216	0.82574	-0.593489	0.0132988	0.00918707	0.0149413	0.807135	0.766526	0.910031	0.00963888	0.860251	-0.614233	0.0102432	0.00907019	0.805617	0.91859	GTGAACAACATCTCCGTCAAGTACGTCAGTCCCGGCTCCGTGGGACCCAGCCCAGTGCCTCTCAAATCAGGGGCCTCCTTCTCTGACTTGGTTAAGCTGCTGAGTAATCGCCCACCTTCCAGGAACTCTCCCGTGACAATTCCCCGGAGCACCCCGAGC
A_tiles_P04386:699	VGPSPVPLKSGASFSDLVKLLSNRPPSRNSPVTIPRSTPSHRSVTPFLGQQQQ	GAL4	P04386	699	0.010512	0.710238	-1.06053	0.0156804	0.00559085	0.0132503	0.951675	0.466474	0.807041	0.012026	1.0733	0.288636	0.0130968	0.0110428	1.03005	1.11836	GTGGGACCCTCCCCAGTGCCCCTGAAGAGTGGGGCCAGCTTTAGCGACCTCGTTAAATTGCTGTCTAACCGGCCGCCTAGCAGAAATTCACCCGTGACAATCCCAAGGTCTACCCCTTCCCACCGCTCCGTCACTCCGTTCCTGGGCCAGCAACAGCAG
A_tiles_P04386:712	FSDLVKLLSNRPPSRNSPVTIPRSTPSHRSVTPFLGQQQQLQSLVPLTPSALF	GAL4	P04386	712	0.011028	0.745099	-0.912006	0.0138537	0.00771173	0.0125538	0.840809	0.64343	0.764616	0.0112153	1.00094	0.00383771	0.0127085	0.00989751	0.999507	1.00238	TTCTCCGACCTGGTGAAGCTGTTGAGCAACCGGCCACCCTCTAGAAATAGCCCTGTTACCATCCCTAGGTCAACGCCAAGCCACCGCAGTGTCACTCCCTTTCTCGGCCAGCAACAGCAGCTGCAGTCCCTGGTGCCGCTCACACCCTCCGCCCTGTTC
A_tiles_P04386:724	PSRNSPVTIPRSTPSHRSVTPFLGQQQQLQSLVPLTPSALFGGANFNQSGNIA	GAL4	P04386	724	0.0116533	0.787344	-0.741072	0.0116253	0.00986728	0.0137956	0.705565	0.823279	0.840251	0.00877968	0.783569	-0.9952	0.0101228	0.00761478	0.796146	0.771192	CCCTCCCGCAACTCTCCTGTGACCATTCCCAGGTCAACTCCCAGCCACAGAAGTGTGACACCTTTTTTGGGACAGCAGCAACAGCTGCAGAGCCTGGTCCCACTCACGCCGTCCGCTCTGTTCGGCGGCGCAAATTTCAACCAGTCCGGGAACATCGCC
A_tiles_P04386:737	PSHRSVTPFLGQQQQLQSLVPLTPSALFGGANFNQSGNIADSSLSFTFTNSSN	GAL4	P04386	737	0.0109693	0.741135	-0.92854	0.012148	0.00808523	0.0134383	0.737287	0.674593	0.81849	0.00825716	0.736935	-1.24557	0.00793055	0.00859723	0.623728	0.87069	CCCTCCCACCGCAGTGTGACGCCATTCCTGGGGCAGCAACAGCAGCTCCAGTCTCTGGTCCCGCTGACTCCTAGCGCTCTCTTTGGAGGCGCCAATTTTAATCAGAGCGGTAACATCGCAGACTCTTCCTTGTCATTCACCTTCACAAACAGCTCCAAC
A_tiles_P04386:750	QQLQSLVPLTPSALFGGANFNQSGNIADSSLSFTFTNSSNGPNLITTQTNSQA	GAL4	P04386	750	0.0119061	0.804425	-0.674548	0.0125709	0.010191	0.0131742	0.762957	0.850286	0.802401	0.00672552	0.600239	-2.08276	0.00679096	0.00666071	0.5341	0.674568	CAGCAGCTGCAGAGCCTGGTGCCTCTGACCCCAAGCGCCTTGTTCGGAGGTGCTAATTTTAATCAAAGCGGGAACATCGCAGACTCATCCCTCTCCTTCACCTTTACTAATAGTTCTAACGGCCCCAACCTCATTACGACACAGACCAACTCCCAGGCC
A_tiles_P04386:763	LFGGANFNQSGNIADSSLSFTFTNSSNGPNLITTQTNSQALSQPIASSNVHDN	GAL4	P04386	763	0.0152222	1.02848	0.0870386	0.0130055	0.0134843	0.0201133	0.78933	1.12506	1.22504	0.0106605	0.951426	-0.203178	0.0124685	0.00911466	0.980629	0.923093	TTGTTCGGCGGAGCCAACTTTAACCAGAGTGGGAATATCGCTGATAGCAGCCTGTCTTTCACTTTCACCAACTCTTCCAACGGTCCCAATCTCATTACAACCCAGACGAATTCCCAAGCACTGTCACAGCCTATCGCCTCCAGCAACGTGCACGACAAC
A_tiles_P04386:776	ADSSLSFTFTNSSNGPNLITTQTNSQALSQPIASSNVHDNFMNNEITASKIDD	GAL4	P04386	776	0.0104475	0.705878	-1.07961	0.0115407	0.00859458	0.0114969	0.70043	0.717091	0.700245	0.00818617	0.7306	-1.28081	0.0096953	0.00691195	0.762523	0.700012	GCCGATAGCTCCCTCTCTTTCACGTTTACCAACTCCTCCAACGGCCCTAATCTGATTACCACTCAGACCAATAGCCAGGCTCTGTCACAACCCATAGCCTCTAGCAATGTGCACGACAACTTCATGAACAACGAGATCACAGCAAGTAAGATCGACGAC
A_tiles_P04386:78	MILKMDSLQDIKALLTGLFVQDNVNKDAVTDRLASVETDMPLTLRQHRISATS	GAL4	P04386	78	0.0227541	1.53736	1.33302	0.0311203	0.0178308	0.0212307	1.88876	1.48772	1.2931	0.0112114	1.0006	0.00243073	0.0128441	0.00978626	1.01017	0.99111	ATGATTCTGAAGATGGACAGTTTGCAGGATATCAAGGCCCTGCTCACAGGCCTGTTCGTCCAAGACAACGTTAATAAAGATGCTGTGACTGACAGACTGGCAAGCGTGGAGACCGACATGCCCCTGACGCTCCGCCAGCACAGGATCTCTGCCACCTCC
A_tiles_P04386:789	NGPNLITTQTNSQALSQPIASSNVHDNFMNNEITASKIDDGNNSKPLSPGWTD	GAL4	P04386	789	0.012066	0.815231	-0.633188	0.0120847	0.0113778	0.012776	0.733449	0.949313	0.778149	0.00942771	0.841405	-0.70462	0.0103187	0.00861364	0.811555	0.872352	AACGGGCCAAACCTGATCACCACGCAGACAAATTCACAAGCTCTCAGTCAGCCTATTGCATCTTCCAATGTGCACGACAACTTCATGAACAACGAGATAACTGCCTCCAAAATCGATGACGGCAACAATAGCAAGCCGCTGAGCCCCGGATGGACCGAC
A_tiles_P04386:802	ALSQPIASSNVHDNFMNNEITASKIDDGNNSKPLSPGWTDQTAYNAFGITTGM	GAL4	P04386	802	0.013375	0.903671	-0.313952	0.0114381	0.012197	0.0171505	0.694199	1.01766	1.04459	0.00918218	0.819491	-0.812299	0.0108636	0.00776099	0.854409	0.786	GCCCTCTCCCAGCCTATCGCCTCTAGCAACGTGCACGACAACTTTATGAACAACGAGATCACGGCTTCCAAGATAGACGACGGCAATAATAGCAAACCCCTGAGTCCAGGGTGGACAGATCAGACTGCATACAATGCGTTCGGAATTACCACCGGCATG
A_tiles_P04386:815	NFMNNEITASKIDDGNNSKPLSPGWTDQTAYNAFGITTGMFNTTTMDDVYNYL	GAL4	P04386	815	0.0606463	4.09752	4.37155	0.0741671	0.0467895	0.0642767	4.50136	3.9039	3.91491	0.0165244	1.47477	1.58526	0.0196391	0.0139037	1.54459	1.40811	AACTTCATGAACAACGAGATCACTGCTAGCAAGATTGACGACGGAAATAATTCCAAACCTCTGTCTCCCGGGTGGACTGATCAGACCGCATATAATGCCTTTGGTATCACCACAGGCATGTTCAACACGACAACCATGGATGACGTGTACAACTACCTC
A_tiles_P04386:828	DGNNSKPLSPGWTDQTAYNAFGITTGMFNTTTMDDVYNYLFDDEDTPPNPKKE	GAL4	P04386	828	0.0534509	3.61137	3.98009	0.0597833	0.0394685	0.0647193	3.62837	3.29306	3.94187	0.0114145	1.01872	0.0756677	0.0148391	0.00878017	1.16708	0.889218	GACGGGAACAACTCCAAGCCGCTCAGCCCCGGATGGACCGATCAGACAGCTTATAATGCCTTTGGCATCACTACTGGCATGTTCAACACCACAACCATGGATGACGTGTACAATTACCTGTTCGACGATGAAGACACGCCACCTAACCCCAAAAAGGAG
A_tiles_P04386:91	LLTGLFVQDNVNKDAVTDRLASVETDMPLTLRQHRISATSSSEESSNKGQRQL	GAL4	P04386	91	0.0103768	0.701099	-1.10067	0.00650275	0.00919695	0.018683	0.394665	0.76735	1.13793	0.0072951	0.651073	-1.75105	0.00525491	0.0101274	0.413292	1.02566	CTGCTGACCGGCCTGTTCGTGCAGGACAACGTTAATAAGGACGCCGTCACAGACAGGTTGGCTTCAGTGGAAACGGATATGCCCCTGACTCTCCGGCAACACAGAATCTCTGCAACCAGTTCCAGCGAGGAGTCCAGCAACAAAGGGCAGCGCCAGCTC
A_tiles_P05085:0	MGISSKNGPKKMGRAKTFTGCWTCRGRKVKCDLRHPHCQRCEKSNLPCGGYDI	ARG81	P05085	0	0.0303833	2.05282	2.22925	0.0337024	0.0271246	0.0306817	2.04547	2.26315	1.86874	0.0150437	1.34262	1.20218	0.016553	0.013672	1.30187	1.38464	ATGGGGATCTCCTCTAAGAACGGGCCCAAGAAGATGGGCCGGGCCAAAACCTTCACTGGTTGTTGGACATGTCGCGGACGCAAAGTGAAATGCGATCTCAGACATCCACACTGCCAGAGGTGCGAGAAGAGCAATCTGCCTTGCGGCGGCTACGACATT
A_tiles_P05085:103	YVYHEDMDDELTMLHTPPIEKISDNKTWIIKKFGVFKGTDKIDKQYAPRKKRN	ARG81	P05085	103	0.0159534	1.07788	0.232459	0.0172858	0.0119189	0.0197078	1.04911	0.994456	1.20035	0.0156922	1.40049	1.37439	0.0154781	0.0159092	1.21733	1.61122	TACGTGTACCACGAGGACATGGATGATGAACTGACCATGCTCCATACGCCCCCTATTGAGAAGATATCCGACAACAAGACATGGATCATCAAGAAGTTCGGCGTCTTTAAGGGGACTGACAAAATCGACAAACAGTATGCCCCACGCAAAAAGCGGAAT
A_tiles_P05085:116	LHTPPIEKISDNKTWIIKKFGVFKGTDKIDKQYAPRKKRNRKRVAKSLESSAS	ARG81	P05085	116	0.0136483	0.922134	-0.251264	0.0111022	0.0144203	0.0158798	0.673819	1.20316	0.967197	0.0148459	1.32497	1.14818	0.0179525	0.0122769	1.41194	1.24335	CTGCACACGCCCCCAATTGAGAAGATCAGTGACAACAAGACATGGATCATCAAGAAGTTCGGGGTGTTTAAGGGCACCGACAAAATAGATAAGCAGTACGCTCCTAGAAAAAAGCGGAATAGGAAACGCGTCGCAAAAAGCCTCGAATCATCCGCCTCT
A_tiles_P05085:129	TWIIKKFGVFKGTDKIDKQYAPRKKRNRKRVAKSLESSASISLSSLPSSSTIS	ARG81	P05085	129	0.0265859	1.79625	1.81542	0.0269626	0.0240338	0.028998	1.63642	2.00527	1.76619	0.0174205	1.55474	1.80074	0.0227012	0.0133682	1.78542	1.35387	ACCTGGATTATCAAGAAGTTCGGGGTCTTTAAGGGCACAGACAAGATAGATAAGCAGTACGCCCCTCGCAAAAAGAGAAACCGGAAAAGGGTGGCAAAATCTCTCGAGTCAAGTGCTTCCATCTCTCTGAGTTCCCTGCCCTCCAGCAGCACTATCAGC
A_tiles_P05085:13	RAKTFTGCWTCRGRKVKCDLRHPHCQRCEKSNLPCGGYDIKLRWSKPMQFDPY	ARG81	P05085	13	0.0142252	0.961115	-0.122931	0.0148335	0.0127147	0.0152626	0.900273	1.06085	0.929602	0.0140571	1.25457	0.925405	0.0151757	0.0130209	1.19355	1.3187	CGCGCCAAGACATTCACTGGATGCTGGACCTGCCGCGGCCGGAAGGTGAAATGTGATCTCCGGCATCCACACTGCCAGAGATGTGAGAAAAGCAACCTGCCTTGCGGGGGTTATGACATCAAGCTGAGGTGGTCCAAGCCGATGCAGTTTGACCCCTAC
A_tiles_P05085:142	DKIDKQYAPRKKRNRKRVAKSLESSASISLSSLPSSSTISFPIRHIEDKLRNK	ARG81	P05085	142	0.0168252	1.13678	0.397363	0.0206542	0.0123847	0.0186203	1.25355	1.03332	1.13411	0.0173258	1.54629	1.7785	0.0188685	0.0159092	1.48399	1.61122	GACAAGATCGATAAACAGTACGCCCCTAGGAAGAAGCGCAATCGGAAACGGGTGGCAAAATCTCTCGAATCCAGCGCTTCTATTTCACTGAGCAGTCTGCCAAGCTCCAGTACCATATCCTTCCCCATCAGACACATCGAGGACAAGTTGCGCAACAAG
A_tiles_P05085:155	NRKRVAKSLESSASISLSSLPSSSTISFPIRHIEDKLRNKGHVKTGILSANDG	ARG81	P05085	155	0.0135256	0.913844	-0.279254	0.0156693	0.0118721	0.0133011	0.951001	0.990555	0.810135	0.00954065	0.851484	-0.656032	0.0123098	0.00739442	0.968151	0.748875	AACCGGAAACGCGTGGCTAAGAGCTTGGAGTCCTCCGCATCTATATCTCTCAGCTCACTGCCTTCCAGCAGTACCATTAGTTTCCCCATCAGGCACATCGAAGATAAGCTGAGAAACAAGGGACATGTCAAAACAGGGATCCTGAGCGCCAATGACGGC
A_tiles_P05085:168	SISLSSLPSSSTISFPIRHIEDKLRNKGHVKTGILSANDGVPPTPNLLDYDWN	ARG81	P05085	168	0.0167489	1.13163	0.383284	0.0172449	0.0145177	0.0187674	1.04663	1.21129	1.14307	0.0104632	0.933818	-0.279404	0.00900841	0.0121529	0.7085	1.23079	TCCATCTCACTGTCCAGTCTGCCCTCCAGCTCTACCATCAGCTTCCCAATACGCCACATTGAGGACAAGCTGAGAAACAAGGGACATGTGAAAACTGGCATCCTCAGCGCCAATGATGGGGTCCCGCCCACACCTAACTTGCTCGACTACGACTGGAAC
A_tiles_P05085:181	SFPIRHIEDKLRNKGHVKTGILSANDGVPPTPNLLDYDWNNLNITGYEWISSE	ARG81	P05085	181	0.0350062	2.36516	2.66824	0.0448848	0.0246747	0.038733	2.72415	2.05874	2.35912	0.0155173	1.38489	1.32867	0.0190794	0.0126203	1.50057	1.27813	TCCTTCCCGATCCGGCACATCGAGGACAAGCTGCGCAACAAGGGCCATGTGAAAACAGGTATTTTGAGTGCCAATGATGGAGTCCCCCCAACTCCTAATCTGCTCGACTATGACTGGAACAACCTGAACATAACCGGGTACGAATGGATCAGCTCTGAG
A_tiles_P05085:194	KGHVKTGILSANDGVPPTPNLLDYDWNNLNITGYEWISSELRDDALLSAVTLQ	ARG81	P05085	194	0.0353685	2.38965	2.70016	0.0409113	0.0295834	0.0365561	2.48299	2.4683	2.22653	0.0161945	1.44533	1.50298	0.0184447	0.0142189	1.45065	1.44002	AAGGGGCACGTGAAAACGGGCATTCTGAGTGCTAATGATGGTGTCCCTCCAACTCCCAATTTGCTGGACTATGACTGGAACAACCTCAACATCACAGGATACGAGTGGATCTCCTCTGAACTGAGAGATGACGCACTGCTCAGCGCCGTGACCCTGCAG
A_tiles_P05085:207	GVPPTPNLLDYDWNNLNITGYEWISSELRDDALLSAVTLQGHHLGHTQPQEIS	ARG81	P05085	207																	GGCGTGCCGCCCACTCCAAACCTGTTGGACTACGACTGGAACAACCTCAATATCACGGGATATGAGTGGATTAGCTCCGAACTGAGAGATGATGCTCTGCTGAGTGCCGTCACCCTGCAAGGCCATCACCTCGGGCACACACAGCCTCAGGAGATCTCT
A_tiles_P05085:220	NNLNITGYEWISSELRDDALLSAVTLQGHHLGHTQPQEISLEENSNVVSGEEH	ARG81	P05085	220	0.035734	2.41434	2.73202	0.0317781	0.0317563	0.0452152	1.92868	2.6496	2.75393	0.00961127	0.857786	-0.625938	0.0104889	0.00880711	0.824936	0.891946	AACAACCTGAACATCACTGGCTACGAGTGGATCAGCAGTGAGCTCAGAGACGATGCTTTGCTCTCTGCCGTGACACTGCAAGGACACCATCTGGGTCACACCCAGCCCCAGGAAATTTCCCTGGAAGAAAATTCCAATGTGGTCAGCGGGGAGGAGCAC
A_tiles_P05085:233	ELRDDALLSAVTLQGHHLGHTQPQEISLEENSNVVSGEEHVNAKEHGCAFEAD	ARG81	P05085	233	0.0107041	0.723213	-1.00441	0.0112773	0.00932123	0.0116673	0.684442	0.77772	0.710623	0.0082983	0.740607	-1.22529	0.00876672	0.00785491	0.689492	0.795511	GAGCTCCGCGACGACGCCCTGTTGTCTGCTGTTACCCTGCAGGGACACCATCTGGGTCATACACAACCCCAGGAAATCAGCCTCGAAGAAAATTCCAACGTGGTCAGTGGGGAGGAGCACGTGAACGCAAAGGAGCACGGCTGCGCCTTCGAGGCGGAT
A_tiles_P05085:246	QGHHLGHTQPQEISLEENSNVVSGEEHVNAKEHGCAFEADNQGSSTLPNKAAS	ARG81	P05085	246	0.0103688	0.700558	-1.10306	0.0105283	0.00844618	0.0125362	0.638982	0.704709	0.763545	0.00702841	0.627271	-1.90301	0.00707202	0.00698506	0.556206	0.707417	CAGGGCCACCACCTGGGCCACACACAGCCCCAAGAGATCAGTCTCGAGGAGAACTCCAATGTCGTGTCAGGAGAAGAGCATGTGAATGCCAAAGAACATGGTTGCGCTTTCGAAGCAGACAACCAGGGGTCTTCCACCCTGCCTAACAAGGCGGCCAGC
A_tiles_P05085:258	ISLEENSNVVSGEEHVNAKEHGCAFEADNQGSSTLPNKAASANDKLYQQNLKL	ARG81	P05085	258																	ATCTCCCTGGAGGAGAACAGCAACGTGGTGAGCGGAGAGGAGCACGTCAATGCTAAAGAACATGGGTGCGCCTTCGAAGCAGATAATCAAGGCTCAAGTACCCTCCCCAATAAAGCCGCGTCTGCCAACGACAAGCTGTACCAGCAGAACCTGAAGTTG
A_tiles_P05085:26	RKVKCDLRHPHCQRCEKSNLPCGGYDIKLRWSKPMQFDPYGVPIPQNSPATTT	ARG81	P05085	26	0.012665	0.855704	-0.483006	0.015283	0.0099901	0.0133059	0.927554	0.833527	0.810422	0.0125023	1.1158	0.447117	0.0167679	0.00932181	1.31878	0.944072	CGCAAGGTGAAGTGCGACCTCAGGCACCCACATTGCCAGCGGTGTGAGAAATCTAATCTGCCTTGTGGAGGGTATGACATCAAGCTGAGATGGTCCAAACCCATGCAATTCGATCCTTACGGCGTCCCGATTCCCCAGAACAGCCCCGCCACAACCACT
A_tiles_P05085:271	EHVNAKEHGCAFEADNQGSSTLPNKAASANDKLYQQNLKLLFQKNSSNSEEPD	ARG81	P05085	271	0.0126305	0.853373	-0.49146	0.0102441	0.0113987	0.017256	0.621733	0.951053	1.05101	0.00822528	0.734089	-1.26136	0.00948454	0.00713321	0.745947	0.722421	GAGCACGTGAACGCCAAGGAACATGGGTGCGCTTTCGAAGCGGACAATCAAGGCTCCAGTACCCTGCCTAATAAAGCCGCATCTGCCAATGATAAACTGTACCAGCAGAACCTGAAGTTGCTCTTTCAGAAGAACTCCAGCAACAGCGAGGAGCCCGAC
A_tiles_P05085:284	ADNQGSSTLPNKAASANDKLYQQNLKLLFQKNSSNSEEPDPQALIDDVFVNIE	ARG81	P05085	284	0.0162109	1.09528	0.282086	0.0165679	0.0121726	0.0211238	1.00554	1.01563	1.28659	0.00729984	0.651496	-1.7484	0.00794984	0.006703	0.625245	0.67885	GCCGACAACCAGGGCTCCAGTACCCTGCCCAATAAGGCAGCTTCAGCCAATGATAAACTGTACCAGCAGAACCTCAAGCTCTTGTTTCAGAAGAACAGCTCCAATTCTGAAGAGCCTGATCCACAAGCGCTGATTGACGACGTCTTCGTGAACATCGAG
A_tiles_P05085:297	ASANDKLYQQNLKLLFQKNSSNSEEPDPQALIDDVFVNIEPRSLPASDLNKIT	ARG81	P05085	297	0.0144031	0.973136	-0.0844052	0.0150279	0.0113508	0.0175164	0.912077	0.947053	1.06688	0.00802973	0.716637	-1.35954	0.00915201	0.00704506	0.719794	0.713493	GCCTCCGCCAACGACAAACTGTACCAGCAGAACCTGAAGTTGCTCTTCCAGAAGAATTCTAGCAACAGTGAGGAACCAGACCCTCAAGCACTGATTGATGATGTCTTTGTGAATATCGAGCCCAGATCCCTCCCGGCTAGCGACCTGAACAAGATCACC
A_tiles_P05085:310	LLFQKNSSNSEEPDPQALIDDVFVNIEPRSLPASDLNKITLAPPNEESRMPKS	ARG81	P05085	310	0.014845	1.00299	0.00926585	0.013332	0.0138119	0.0177662	0.809146	1.1524	1.08209	0.00839958	0.749646	-1.17579	0.00963643	0.00732149	0.757893	0.741488	CTCCTGTTCCAGAAGAACTCCTCTAACTCAGAGGAACCTGATCCTCAGGCACTGATTGATGACGTGTTTGTCAATATCGAACCCAGATCCTTGCCCGCTAGTGACCTCAATAAAATCACCCTGGCCCCGCCAAACGAGGAGAGCCGCATGCCCAAGAGC
A_tiles_P05085:323	DPQALIDDVFVNIEPRSLPASDLNKITLAPPNEESRMPKSMLELTSYSSDLPP	ARG81	P05085	323	0.0128051	0.865165	-0.448922	0.0144505	0.00983801	0.0147692	0.877034	0.820837	0.899548	0.00989511	0.883119	-0.507179	0.01092	0.00896645	0.858841	0.908083	GACCCGCAGGCCCTGATCGACGATGTCTTCGTGAACATTGAGCCAAGGAGCCTGCCTGCTTCTGATCTGAACAAAATCACCTTGGCGCCCCCAAATGAAGAGAGTCGCATGCCCAAGTCCATGCTCGAGCTCACATCCTACTCAAGCGACCTGCCTCCC
A_tiles_P05085:336	EPRSLPASDLNKITLAPPNEESRMPKSMLELTSYSSDLPPELVDIIPKTDLTV	ARG81	P05085	336	0.00902452	0.609735	-1.53344	0.00923311	0.00679578	0.0117135	0.560377	0.567007	0.713434	0.00765029	0.682773	-1.55706	0.00891833	0.00656255	0.701415	0.664627	GAGCCGCGCTCCTTGCCAGCCTCTGATCTGAACAAGATTACTCTCGCTCCTCCCAATGAAGAGAGCAGAATGCCCAAAAGTATGCTGGAACTCACATCCTACAGCTCAGATCTGCCTCCAGAGCTGGTGGACATCATCCCCAAGACCGACCTGACGGTC
A_tiles_P05085:349	TLAPPNEESRMPKSMLELTSYSSDLPPELVDIIPKTDLTVHGLARFLLNHYFN	ARG81	P05085	349	0.0181755	1.22801	0.636635	0.0240532	0.015187	0.0164366	1.45984	1.26713	1.00111	0.0178998	1.59752	1.9115	0.0192459	0.0166479	1.51367	1.68603	ACCCTGGCCCCTCCGAACGAGGAGTCTAGGATGCCCAAGTCAATGTTGGAACTGACGAGCTATTCCAGTGATCTCCCTCCAGAGCTGGTGGACATTATCCCCAAAACTGACCTGACAGTCCATGGCCTGGCTCGCTTTCTCCTCAATCACTACTTCAAC
A_tiles_P05085:362	SMLELTSYSSDLPPELVDIIPKTDLTVHGLARFLLNHYFNNVADKMTVVVLEK	ARG81	P05085	362	0.0256823	1.7352	1.70824	0.0313361	0.0229665	0.0235376	1.90185	1.91622	1.43361	0.0156858	1.39992	1.37273	0.0174878	0.0140694	1.3754	1.42489	TCCATGCTGGAGCTGACTAGTTATTCTAGCGACTTGCCTCCAGAACTCGTCGATATCATTCCCAAGACAGATCTCACCGTTCATGGCCTGGCCAGATTCCTGCTCAATCACTACTTTAACAACGTGGCTGACAAAATGACGGTCGTGGTGCTGGAGAAG
A_tiles_P05085:375	PELVDIIPKTDLTVHGLARFLLNHYFNNVADKMTVVVLEKNPWKTLYFPRALM	ARG81	P05085	375	0.0146521	0.989954	-0.0312944	0.0165324	0.0118024	0.0161209	1.00339	0.984735	0.981879	0.0146376	1.30637	1.09052	0.0159018	0.0134738	1.25066	1.36457	CCGGAGCTGGTGGACATCATTCCTAAGACTGATCTGACGGTTCATGGCTTGGCTAGGTTTCTCCTGAACCACTATTTCAACAACGTGGCAGACAAGATGACCGTCGTGGTCCTGGAAAAAAATCCCTGGAAGACACTCTACTTCCCACGCGCCCTGATG
A_tiles_P05085:388	VHGLARFLLNHYFNNVADKMTVVVLEKNPWKTLYFPRALMALGDLAGLGQSSN	ARG81	P05085	388																	GTGCACGGCCTGGCCCGCTTCCTGCTCAACCATTACTTCAATAACGTCGCAGACAAGATGACAGTGGTGGTTCTCGAGAAGAATCCCTGGAAAACCCTGTATTTTCCTAGAGCCTTGATGGCGCTGGGAGATCTGGCTGGCCTCGGGCAGTCCAGCAAC
A_tiles_P05085:39	RCEKSNLPCGGYDIKLRWSKPMQFDPYGVPIPQNSPATTTNLSGSVDEPQYQR	ARG81	P05085	39	0.0134114	0.906134	-0.305518	0.0160869	0.00938464	0.0159785	0.97635	0.78301	0.973204	0.00884687	0.789565	-0.964094	0.0115515	0.0067755	0.908511	0.686193	CGCTGCGAGAAGAGTAACCTGCCATGTGGCGGGTACGACATCAAGCTCAGGTGGTCTAAACCTATGCAGTTCGATCCGTATGGAGTGCCCATTCCTCAAAACAGCCCCGCCACAACTACCAATCTGTCAGGCTCCGTCGACGAACCCCAGTACCAGCGG
A_tiles_P05085:401	NNVADKMTVVVLEKNPWKTLYFPRALMALGDLAGLGQSSNSRNALLNALLAVS	ARG81	P05085	401	0.0207747	1.40363	1.05093	0.0288458	0.0159521	0.0194851	1.75071	1.33097	1.18678	0.0157318	1.40403	1.38469	0.0145319	0.0170308	1.14292	1.72481	AACAACGTGGCCGACAAGATGACAGTGGTTGTGCTCGAGAAAAATCCTTGGAAGACCTTGTACTTCCCCAGAGCACTGATGGCTCTGGGAGATCTGGCTGGCCTCGGGCAGTCCTCTAATAGTCGCAACGCCCTGCTGAACGCGCTCCTGGCCGTCAGC
A_tiles_P05085:414	KNPWKTLYFPRALMALGDLAGLGQSSNSRNALLNALLAVSCFHLQSKYPRNYK	ARG81	P05085	414																	AAGAACCCCTGGAAGACCTTGTATTTTCCTCGGGCCCTGATGGCACTCGGAGACCTGGCTGGGCTCGGCCAGAGCTCCAATTCTCGCAACGCCCTGCTGAATGCGCTGCTGGCCGTGAGTTGCTTCCACCTCCAGTCAAAATACCCAAGGAACTACAAG
A_tiles_P05085:426	LMALGDLAGLGQSSNSRNALLNALLAVSCFHLQSKYPRNYKLQKYFLGLGIEL	ARG81	P05085	426	0.0100813	0.681138	-1.1902	0.0103646	0.00846257	0.0116815	0.629052	0.706077	0.711487	0.0142711	1.27367	0.987071	0.0129437	0.0157348	1.018	1.59355	CTGATGGCGCTGGGCGACCTGGCCGGTCTGGGGCAATCAAGTAACAGCAGAAACGCATTGCTCAATGCCCTCCTCGCTGTGTCTTGCTTTCACCTGCAGTCCAAATATCCTCGCAACTACAAGTTGCAGAAGTACTTCCTCGGACTGGGCATCGAGCTG
A_tiles_P05085:439	SNSRNALLNALLAVSCFHLQSKYPRNYKLQKYFLGLGIELRNQASNFLRLCLN	ARG81	P05085	439	0.00993868	0.671499	-1.23437	0.00672698	0.00906103	0.016106	0.408274	0.75601	0.980972	0.0139243	1.24271	0.88667	0.013873	0.0139758	1.09109	1.41541	TCCAACTCACGCAACGCCCTGTTGAATGCTCTCCTGGCCGTGAGCTGCTTTCACCTGCAGTCTAAATATCCTCGGAATTACAAGCTCCAGAAGTACTTCCTGGGACTGGGCATCGAGTTGAGAAATCAAGCAAGTAACTTCCTCAGGCTGTGTCTGAAC
A_tiles_P05085:452	VSCFHLQSKYPRNYKLQKYFLGLGIELRNQASNFLRLCLNTKSSIPEKYKDVL	ARG81	P05085	452										0.0149057	1.3303	1.16458	0.0214741	0.0103464	1.68891	1.04784	GTCAGTTGCTTCCACCTGCAGTCTAAGTACCCTCGGAACTACAAGCTCCAGAAATATTTCCTGGGGTTGGGCATTGAACTGAGGAACCAAGCCTCAAATTTTCTCCGCCTGTGTCTGAACACCAAATCCAGCATCCCCGAGAAGTACAAGGACGTGCTC
A_tiles_P05085:465	YKLQKYFLGLGIELRNQASNFLRLCLNTKSSIPEKYKDVLTAILSMNSIDVVW	ARG81	P05085	465	0.0119887	0.81001	-0.653103	0.0118746	0.0122816	0.0118153	0.720693	1.02472	0.719638	0.013951	1.24509	0.894478	0.0123079	0.0158134	0.967999	1.60151	TACAAGCTGCAGAAATATTTCCTGGGCCTGGGGATAGAGCTCAGAAATCAGGCTTCAAACTTTCTGCGCTTGTGCCTGAACACCAAGAGTAGCATTCCCGAAAAGTACAAAGATGTGCTCACAGCCATCCTCTCCATGAACTCTATCGACGTCGTGTGG
A_tiles_P05085:478	LRNQASNFLRLCLNTKSSIPEKYKDVLTAILSMNSIDVVWGTMADCQDHLALC	ARG81	P05085	478	0.0116778	0.789002	-0.734552	0.0103377	0.0101065	0.0152425	0.627417	0.843242	0.928379	0.011122	0.992619	-0.0302299	0.0146271	0.0084569	1.1504	0.856478	CTGCGCAACCAGGCCTCAAACTTCTTGCGGCTGTGTCTGAATACAAAAAGCTCTATCCCCGAGAAGTACAAGGATGTGCTCACTGCTATTCTCTCCATGAACAGTATCGATGTCGTGTGGGGCACCATGGCAGACTGCCAGGACCACCTGGCCCTGTGC
A_tiles_P05085:491	NTKSSIPEKYKDVLTAILSMNSIDVVWGTMADCQDHLALCEDFVESRMKLRPN	ARG81	P05085	491	0.0419856	2.83672	3.23174	0.055076	0.0346662	0.0387642	3.34268	2.89239	2.36102	0.015467	1.3804	1.31541	0.0173542	0.013785	1.36489	1.39608	AACACTAAGAGCAGTATCCCTGAGAAGTACAAGGACGTGTTGACAGCAATCCTGTCCATGAATTCTATTGACGTCGTGTGGGGCACCATGGCCGATTGTCAGGATCACCTGGCTCTGTGCGAAGACTTCGTTGAGTCAAGGATGAAACTCCGCCCCAAC
A_tiles_P05085:504	LTAILSMNSIDVVWGTMADCQDHLALCEDFVESRMKLRPNISEKTKTLHRIFS	ARG81	P05085	504	0.0135389	0.914745	-0.276199	0.0161432	0.011255	0.0136589	0.979763	0.939065	0.831924	0.00795917	0.71034	-1.39555	0.00856649	0.00739491	0.673744	0.748924	CTGACTGCCATACTGTCCATGAACAGCATTGACGTGGTGTGGGGCACCATGGCTGACTGTCAGGATCATCTCGCATTGTGCGAAGATTTTGTCGAGAGTAGGATGAAACTGCGCCCCAATATCTCAGAGAAGACAAAGACGCTCCACCGGATCTTCTCT
A_tiles_P05085:517	WGTMADCQDHLALCEDFVESRMKLRPNISEKTKTLHRIFSFLKLIQDSTALDK	ARG81	P05085	517	0.0156575	1.05789	0.174423	0.0206107	0.0127511	0.0146059	1.2509	1.06389	0.889602	0.0163763	1.46155	1.54852	0.0165343	0.0162198	1.3004	1.64267	TGGGGCACCATGGCCGACTGCCAGGATCATCTGGCACTGTGTGAAGATTTTGTGGAGTCTCGGATGAAACTGAGGCCCAACATTAGTGAGAAGACAAAAACTCTCCACCGCATCTTCTCCTTCTTGAAGCTCATCCAGGACAGCACCGCTCTGGACAAG
A_tiles_P05085:52	IKLRWSKPMQFDPYGVPIPQNSPATTTNLSGSVDEPQYQRRNIDFVRYDEEYV	ARG81	P05085	52	0.0163106	1.10201	0.301082	0.0155329	0.0125002	0.0223481	0.942723	1.04296	1.36116	0.0103146	0.920553	-0.337781	0.0100296	0.0106076	0.788817	1.07429	ATCAAGCTCCGGTGGTCTAAACCTATGCAGTTTGATCCCTATGGAGTCCCAATTCCTCAGAACAGTCCCGCCACAACTACCAATCTGAGCGGCTCCGTGGATGAACCGCAATACCAGCGCAGAAACATCGACTTCGTGAGGTACGACGAGGAGTACGTT
A_tiles_P05085:530	CEDFVESRMKLRPNISEKTKTLHRIFSFLKLIQDSTALDKVRAKEIVILPSEE	ARG81	P05085	530	0.0132949	0.898257	-0.332578	0.0171937	0.0115797	0.0118028	1.04352	0.966155	0.718876	0.012851	1.14693	0.55937	0.0156276	0.0105677	1.22909	1.07025	TGCGAGGACTTTGTGGAATCTCGGATGAAGCTCCGCCCTAACATATCAGAGAAGACAAAGACTCTGCACAGAATCTTCAGCTTCCTGAAACTCATTCAGGACAGTACCGCCCTGGATAAAGTGAGGGCTAAGGAAATCGTCATCTTGCCCTCCGAGGAG
A_tiles_P05085:543	NISEKTKTLHRIFSFLKLIQDSTALDKVRAKEIVILPSEEDDNYKPLDTSNAT	ARG81	P05085	543	0.0157138	1.06169	0.185546	0.0149108	0.0152725	0.0170386	0.904965	1.27426	1.03777	0.0190094	1.69655	2.15691	0.0218735	0.0165203	1.72033	1.67311	AACATCTCAGAGAAGACGAAGACATTGCACCGGATCTTCTCTTTTCTCAAGCTGATTCAGGATTCCACCGCCCTGGATAAAGTCAGAGCTAAAGAAATCGTGATACTGCCAAGCGAGGAGGACGACAATTACAAGCCCCTCGACACTAGTAACGCAACC
A_tiles_P05085:556	SFLKLIQDSTALDKVRAKEIVILPSEEDDNYKPLDTSNATTSSSEPRVDVVQE	ARG81	P05085	556	0.0107097	0.72359	-1.0028	0.0103274	0.00972567	0.0122298	0.62679	0.811464	0.744881	0.00713951	0.637187	-1.83902	0.00873123	0.00583796	0.6867	0.591243	TCCTTCCTGAAGCTGATCCAGGACTCTACAGCCTTGGACAAAGTGCGCGCAAAGGAAATCGTTATTCTGCCTAGCGAGGAAGACGATAACTACAAACCCCTCGATACTTCCAATGCTACCACGTCAAGTAGCGAGCCAAGGGTCGACGTGGTGCAGGAG
A_tiles_P05085:569	KVRAKEIVILPSEEDDNYKPLDTSNATTSSSEPRVDVVQEGLFREALNENDGK	ARG81	P05085	569	0.0101975	0.688985	-1.15469	0.0101921	0.00808392	0.0128704	0.618582	0.674484	0.7839	0.0101706	0.907702	-0.395146	0.0114943	0.00899928	0.904011	0.911408	AAGGTGCGGGCCAAGGAGATCGTTATTCTGCCTAGTGAAGAGGACGACAACTACAAACCCTTGGATACCTCCAATGCTACAACTTCATCTAGCGAACCACGCGTCGATGTGGTGCAGGAAGGACTGTTCAGGGAGGCACTCAACGAGAACGACGGCAAG
A_tiles_P05085:581	EEDDNYKPLDTSNATTSSSEPRVDVVQEGLFREALNENDGKIHIEFVKEPITN	ARG81	P05085	581																	GAGGAGGACGACAACTACAAGCCACTGGACACGTCTAATGCTACTACAAGCAGTTCCGAACCTAGAGTGGATGTTGTGCAGGAAGGCCTGTTTCGCGAAGCCCTCAATGAGAACGATGGGAAAATTCACATCGAGTTCGTCAAGGAGCCCATCACCAAC
A_tiles_P05085:594	ATTSSSEPRVDVVQEGLFREALNENDGKIHIEFVKEPITNVSADSTPSSTTPP	ARG81	P05085	594	0.0115729	0.781914	-0.76252	0.0143281	0.0100209	0.0107953	0.869601	0.836096	0.657508	0.00673369	0.600969	-2.07781	0.00766932	0.00591221	0.603183	0.598763	GCCACCACCTCCTCTTCAGAGCCCAGGGTGGATGTGGTGCAGGAAGGCCTCTTTAGAGAAGCTCTGAATGAGAACGACGGGAAGATTCACATCGAGTTCGTTAAAGAGCCCATCACTAACGTCAGCGCAGACTCCACACCAAGCAGTACCACGCCGCCT
A_tiles_P05085:607	QEGLFREALNENDGKIHIEFVKEPITNVSADSTPSSTTPPIFTNIATESYYNK	ARG81	P05085	607	0.0113975	0.770065	-0.809852	0.00972852	0.0113798	0.0133736	0.590444	0.949477	0.814551	0.0113382	1.01192	0.0483334	0.00873123	0.0147237	0.6867	1.49115	CAGGAGGGCCTGTTCCGCGAAGCTCTCAACGAGAACGACGGGAAGATACACATTGAGTTCGTCAAAGAGCCAATCACCAATGTGTCAGCCGATTCTACACCCAGTTCCACCACTCCTCCGATCTTTACCAATATCGCAACGGAAAGCTATTACAACAAG
A_tiles_P05085:620	GKIHIEFVKEPITNVSADSTPSSTTPPIFTNIATESYYNKSDISKLVSKTDEN	ARG81	P05085	620	0.0110046	0.743519	-0.918584	0.0104081	0.00967708	0.0132316	0.631688	0.80741	0.805898	0.00775307	0.691946	-1.50261	0.00906797	0.00662884	0.713185	0.67134	GGCAAGATCCACATAGAGTTTGTGAAAGAACCCATCACAAATGTGAGCGCTGATTCCACTCCTTCCTCAACAACGCCACCGATTTTCACCAACATTGCCACCGAGTCCTATTACAACAAGAGTGACATCTCTAAACTGGTCAGCAAGACCGACGAGAAC
A_tiles_P05085:633	NVSADSTPSSTTPPIFTNIATESYYNKSDISKLVSKTDENIIGTDSLYGLPNS	ARG81	P05085	633	0.0140969	0.952447	-0.151013	0.013899	0.0155456	0.0129653	0.843559	1.29705	0.789679	0.00710662	0.634252	-1.85786	0.00873123	0.0057843	0.6867	0.585809	AATGTCTCCGCTGACTCCACCCCTTCTAGTACAACCCCACCGATATTCACGAACATTGCCACTGAAAGCTACTACAACAAGAGCGACATCTCCAAGCTGGTGTCTAAAACCGATGAGAATATCATCGGGACAGACTCACTCTATGGCCTGCCCAACAGC
A_tiles_P05085:646	PIFTNIATESYYNKSDISKLVSKTDENIIGTDSLYGLPNSLILLFSDCVRIVR	ARG81	P05085	646	0.017841	1.20541	0.579058	0.020968	0.0126022	0.0214906	1.27259	1.05147	1.30893	0.0118769	1.05999	0.237706	0.0127535	0.0110605	1.00305	1.12016	CCCATTTTCACCAACATCGCCACGGAGAGCTATTACAACAAGAGCGACATAAGTAAGTTGGTGTCCAAAACAGACGAAAACATTATCGGCACTGATTCACTGTACGGACTCCCTAATTCCCTGATCCTGCTCTTTTCTGACTGCGTCCGGATCGTGCGC
A_tiles_P05085:65	YGVPIPQNSPATTTNLSGSVDEPQYQRRNIDFVRYDEEYVYHEDMDDELTMLH	ARG81	P05085	65	0.0477043	3.2231	3.62754	0.0473079	0.046103	0.0497747	2.87121	3.84661	3.03164	0.0135925	1.2131	0.788269	0.0149159	0.0123866	1.17311	1.25446	TACGGGGTCCCTATCCCGCAGAACTCTCCCGCCACGACCACAAATCTCAGCGGCTCCGTTGATGAACCACAATATCAGAGAAGGAACATTGACTTCGTGCGCTACGATGAAGAGTACGTGTATCATGAGGACATGGACGACGAGCTGACTATGCTGCAC
A_tiles_P05085:659	KSDISKLVSKTDENIIGTDSLYGLPNSLILLFSDCVRIVRHNEYYNLTYLPVP	ARG81	P05085	659	0.0143639	0.970485	-0.0928594	0.0197195	0.0125693	0.0119566	1.19682	1.04872	0.728244	0.0174511	1.55747	1.8079	0.0195899	0.0155458	1.54072	1.57441	AAGTCCGACATTAGCAAGCTGGTTTCCAAAACTGACGAAAACATCATCGGAACCGACTCTCTCTATGGCCTGCCAAATTCACTGATCCTGTTGTTCAGTGATTGCGTGAGAATAGTCCGCCACAACGAGTACTACAACCTCACATACCTGCCCGTGCCT
A_tiles_P05085:672	NIIGTDSLYGLPNSLILLFSDCVRIVRHNEYYNLTYLPVPRKFNELSLNFEKR	ARG81	P05085	672	0.0148496	1.0033	0.0102116	0.0188742	0.0125129	0.0138649	1.14551	1.04401	0.844473	0.0193391	1.72597	2.22707	0.0202559	0.0184638	1.5931	1.86993	AACATCATTGGCACCGACAGTTTGTACGGGCTGCCCAATTCTCTCATACTCCTGTTTTCCGATTGCGTCAGAATCGTGCGCCACAATGAATACTACAACCTGACATATCTGCCTGTGCCAAGGAAATTCAACGAGCTGAGCCTCAACTTCGAGAAGCGG
A_tiles_P05085:685	SLILLFSDCVRIVRHNEYYNLTYLPVPRKFNELSLNFEKRLLKWKSEWNFHQE	ARG81	P05085	685	0.0103164	0.697022	-1.11875	0.00891505	0.00829986	0.0148386	0.541073	0.692501	0.90378	0.0102814	0.917596	-0.350911	0.0112506	0.00939572	0.884845	0.951558	AGCCTGATTCTCCTCTTCAGTGACTGCGTGAGGATCGTGAGACACAACGAGTACTACAATTTGACCTATCTGCCCGTCCCTCGGAAATTCAACGAACTGTCCCTCAATTTTGAAAAGCGCCTGCTGAAGTGGAAGTCTGAGTGGAACTTCCATCAGGAG
A_tiles_P05085:698	RHNEYYNLTYLPVPRKFNELSLNFEKRLLKWKSEWNFHQENSEGKSFINSTAE	ARG81	P05085	698	0.0133475	0.901812	-0.320336	0.0167889	0.00955527	0.0148229	1.01895	0.797247	0.902819	0.0147451	1.31597	1.12039	0.0152613	0.0142464	1.20028	1.44282	CGCCATAACGAATACTACAACCTCACATATCTGCCCGTGCCTCGGAAGTTTAATGAATTGTCTCTGAACTTCGAGAAGAGGCTCCTGAAATGGAAAAGCGAGTGGAATTTCCACCAGGAAAATTCAGAGGGCAAGTCCTTCATCAACAGTACCGCCGAG
A_tiles_P05085:711	PRKFNELSLNFEKRLLKWKSEWNFHQENSEGKSFINSTAEALYHHTMSFYFSL	ARG81	P05085	711	0.0061994	0.418858	-2.6973	0.00613467	0.00454476	0.00854568	0.372326	0.379194	0.520493	0.00720627	0.643145	-1.80104	0.00893912	0.00580934	0.70305	0.588345	CCCCGCAAGTTCAACGAGCTGAGCCTCAATTTTGAAAAGCGGCTCCTGAAATGGAAGTCTGAGTGGAACTTCCACCAGGAGAATTCAGAGGGCAAAAGTTTTATCAACTCCACAGCTGAAGCCCTGTATCATCACACCATGAGCTTCTACTTCTCCTTG
A_tiles_P05085:724	RLLKWKSEWNFHQENSEGKSFINSTAEALYHHTMSFYFSLIIYYFTMARSLNC	ARG81	P05085	724	0.00934389	0.631312	-1.42565	0.0106542	0.00742288	0.0103155	0.646627	0.61933	0.628286	0.0126144	1.12581	0.483546	0.0120863	0.0131656	0.950571	1.33336	CGCCTCCTGAAGTGGAAAAGCGAGTGGAACTTTCACCAGGAGAATTCAGAGGGCAAGTCCTTTATTAACTCTACAGCTGAAGCCCTGTATCATCACACCATGAGCTTCTACTTCTCCCTGATCATCTACTACTTCACTATGGCACGGAGTTTGAACTGC
A_tiles_P05085:737	ENSEGKSFINSTAEALYHHTMSFYFSLIIYYFTMARSLNCQFLQNYVAKVLDH	ARG81	P05085	737	0.0190863	1.28955	0.788198	0.019272	0.0167057	0.021596	1.16966	1.39385	1.31535	0.0107481	0.959248	-0.169769	0.0110066	0.0104957	0.865659	1.06296	GAGAACTCCGAAGGCAAGAGTTTTATCAATAGCACCGCAGAGGCCCTCTATCATCACACTATGAGCTTCTACTTCTCCCTGATCATTTACTACTTCACAATGGCTCGCTCTTTGAACTGCCAGTTTCTGCAGAACTATGTCGCCAAAGTGCTGGACCAC
A_tiles_P05085:749	AEALYHHTMSFYFSLIIYYFTMARSLNCQFLQNYVAKVLDHLNAMEELVDQKK	ARG81	P05085	749	0.00934891	0.631652	-1.42398	0.0101461	0.00955104	0.00843204	0.61579	0.796893	0.513572	0.0128072	1.14302	0.545438	0.0138149	0.011873	1.08652	1.20245	GCCGAGGCGCTGTATCACCACACCATGTCCTTCTACTTCTCTCTCATCATTTACTACTTCACAATGGCAAGGAGCCTGAACTGCCAGTTTCTGCAGAATTATGTCGCCAAAGTGTTGGATCATCTGAACGCTATGGAAGAGCTCGTGGACCAAAAGAAG
A_tiles_P05085:762	SLIIYYFTMARSLNCQFLQNYVAKVLDHLNAMEELVDQKKVKIVPLIWQGFMA	ARG81	P05085	762	0.0142433	0.96234	-0.118983	0.0172132	0.0107146	0.0156675	1.0447	0.893972	0.954266	0.0141465	1.26255	0.951287	0.0127584	0.0156857	1.00343	1.58858	TCCCTGATCATTTACTACTTTACCATGGCACGCAGCCTGAACTGCCAGTTCCTGCAAAACTATGTGGCCAAGGTTCTCGATCACTTGAATGCCATGGAGGAACTCGTCGACCAGAAAAAGGTGAAGATAGTGCCCCTGATCTGGCAGGGCTTCATGGCT
A_tiles_P05085:775	NCQFLQNYVAKVLDHLNAMEELVDQKKVKIVPLIWQGFMAGCACTDENRQQEF	ARG81	P05085	775	0.0110456	0.746291	-0.907052	0.0112414	0.00856099	0.0140032	0.682267	0.714289	0.852896	0.0126565	1.12957	0.497147	0.0147137	0.0108869	1.15722	1.10258	AACTGCCAGTTCCTGCAGAACTACGTGGCCAAGGTGTTGGATCACCTCAATGCTATGGAGGAACTGGTGGACCAGAAAAAGGTTAAGATCGTCCCTCTGATTTGGCAAGGCTTTATGGCAGGATGTGCCTGCACCGACGAGAACCGCCAGCAGGAGTTC
A_tiles_P05085:78	TNLSGSVDEPQYQRRNIDFVRYDEEYVYHEDMDDELTMLHTPPIEKISDNKTW	ARG81	P05085	78	0.0377488	2.55047	2.90204	0.0366049	0.0334988	0.0438673	2.22163	2.79498	2.67184	0.0130239	1.16236	0.613915	0.0151874	0.0111687	1.19447	1.13111	ACTAACCTGTCTGGCTCCGTGGACGAGCCTCAGTACCAGCGGAGGAATATTGATTTCGTGCGCTATGACGAGGAATACGTCTACCATGAGGACATGGATGATGAACTGACAATGCTCCACACGCCACCCATCGAGAAAATCAGCGACAACAAGACCTGG
A_tiles_P05085:788	DHLNAMEELVDQKKVKIVPLIWQGFMAGCACTDENRQQEFRRWAAKLAESGVG	ARG81	P05085	788	0.0156962	1.0605	0.182079	0.0141615	0.017226	0.0158522	0.859493	1.43726	0.965515	0.0151959	1.35621	1.24327	0.017875	0.0129184	1.40584	1.30832	GACCACCTGAACGCCATGGAGGAGTTGGTGGACCAGAAGAAGGTTAAAATTGTGCCCCTGATCTGGCAAGGGTTTATGGCTGGATGCGCCTGTACCGATGAAAATAGGCAGCAGGAATTCCGCCGGTGGGCGGCAAAGCTCGCCGAGTCCGGCGTCGGC
A_tiles_P05085:801	KVKIVPLIWQGFMAGCACTDENRQQEFRRWAAKLAESGVGSYWGARQVMLEVW	ARG81	P05085	801	0.0117917	0.796698	-0.704462	0.0131208	0.0097592	0.0128043	0.796331	0.814261	0.779874	0.016976	1.51508	1.69528	0.0212313	0.0135736	1.66982	1.37468	AAGGTGAAGATCGTGCCCCTCATTTGGCAGGGCTTCATGGCCGGTTGCGCATGTACCGACGAGAACAGGCAGCAAGAGTTTCGGAGATGGGCTGCCAAACTGGCCGAATCCGGGGTTGGAAGCTACTGGGGCGCGCGCCAGGTCATGCTGGAGGTGTGG
A_tiles_P05085:814	AGCACTDENRQQEFRRWAAKLAESGVGSYWGARQVMLEVWRRRKEDEPGDNWY	ARG81	P05085	814	0.00598927	0.40466	-2.80419	0.00842223	0.00415525	0.00613899	0.511163	0.346694	0.373908	0.00772024	0.689016	-1.51992	0.00786465	0.00757848	0.618545	0.767515	GCCGGGTGCGCCTGTACCGACGAGAATCGGCAGCAGGAGTTCAGACGGTGGGCTGCCAAACTCGCAGAATCCGGTGTGGGAAGCTACTGGGGCGCGAGGCAAGTCATGCTGGAAGTGTGGCGCAGGCGCAAGGAGGATGAGCCCGGCGACAACTGGTAT
A_tiles_P05085:827	FRRWAAKLAESGVGSYWGARQVMLEVWRRRKEDEPGDNWYSVYKDWEMNLMLS	ARG81	P05085	827	0.00872815	0.58971	-1.63694	0.00873226	0.00825849	0.00922017	0.529979	0.689049	0.561575	0.0143681	1.28232	1.01468	0.0153512	0.0134479	1.20735	1.36194	TTCCGCCGCTGGGCCGCCAAGTTGGCTGAGTCCGGGGTGGGAAGCTACTGGGGTGCAAGACAGGTTATGCTGGAAGTGTGGCGGCGGAGGAAAGAGGATGAACCCGGCGACAATTGGTATAGTGTCTACAAGGACTGGGAGATGAACCTCATGCTGTCT
A_tiles_P05085:90	QRRNIDFVRYDEEYVYHEDMDDELTMLHTPPIEKISDNKTWIIKKFGVFKGTD	ARG81	P05085	90	0.036389	2.45859	2.78832	0.0362653	0.0303196	0.0438223	2.20102	2.52973	2.66909	0.0124173	1.10822	0.419285	0.0127181	0.0121236	1.00027	1.22782	CAGCGCAGGAATATCGACTTCGTGCGGTACGATGAGGAGTACGTGTATCATGAAGATATGGATGACGAACTGACAATGCTCCACACTCCTCCCATTGAGAAAATATCCGACAACAAGACGTGGATCATCAAGAAGTTCGGGGTCTTTAAAGGCACCGAC
A_tiles_P06774:0	MSADETDAKFHPLETDLQSDTAAATSTAAASRSPSLQEKPIEMPLDMGKAPSP	HAP2	P06774	0	0.00875588	0.591584	-1.62711	0.0110127	0.0074169	0.00821832	0.668385	0.618831	0.500555	0.00879646	0.785066	-0.987412	0.011948	0.0064762	0.939695	0.655882	ATGTCCGCCGACGAGACGGACGCAAAGTTCCACCCCCTGGAAACCGACCTCCAGTCCGATACTGCTGCCGCGACATCTACCGCTGCAGCCAGCAGAAGTCCTAGCTTGCAAGAGAAACCAATCGAGATGCCGCTGGATATGGGCAAGGCCCCTTCACCC
A_tiles_P06774:100	PSADFTSFSAVTTLPPPPHQQQQQQQQQQQQQQLVVQAQYTQNQPNLQSDVLG	HAP2	P06774	100	0.0113124	0.764315	-0.833081	0.0125603	0.0102795	0.0112123	0.762312	0.857674	0.682909	0.00829704	0.740494	-1.22592	0.0108571	0.00634063	0.853897	0.642152	CCCTCTGCTGATTTCACCTCCTTTAGTGCCGTGACGACTCTGCCACCCCCTCCTCACCAGCAGCAACAGCAACAGCAGCAACAACAACAGCAGCAGCAGTTGGTCGTGCAGGCACAGTACACACAGAATCAGCCGAACCTGCAGAGCGACGTTCTCGGA
A_tiles_P06774:112	TLPPPPHQQQQQQQQQQQQQQLVVQAQYTQNQPNLQSDVLGTAIAEQPFYVNA	HAP2	P06774	112	0.00837407	0.565787	-1.76531	0.00998096	0.00595816	0.00987473	0.605765	0.49712	0.601442	0.00962321	0.858852	-0.620874	0.012466	0.00742871	0.980433	0.752347	ACTCTGCCGCCTCCTCCCCACCAACAGCAGCAGCAACAACAGCAACAGCAACAACAACAGCAGTTGGTGGTCCAGGCCCAGTATACACAGAACCAGCCAAATCTCCAGTCCGACGTTCTGGGGACCGCTATCGCAGAGCAGCCCTTCTACGTGAACGCC
A_tiles_P06774:12	LETDLQSDTAAATSTAAASRSPSLQEKPIEMPLDMGKAPSPRGEDQRVTNEED	HAP2	P06774	12	0.00807531	0.545602	-1.87791	0.00765848	0.00787747	0.00872867	0.464809	0.657259	0.531639	0.00858825	0.766484	-1.08516	0.00987009	0.00747289	0.77627	0.756821	CTGGAGACCGACTTGCAGAGTGACACTGCCGCCGCGACCAGCACAGCTGCAGCTTCCAGATCTCCCTCACTCCAAGAAAAGCCAATCGAAATGCCTCTGGATATGGGAAAAGCCCCGAGCCCCAGGGGCGAGGATCAGCGCGTGACGAACGAGGAGGAC
A_tiles_P06774:125	QQQQQQQQLVVQAQYTQNQPNLQSDVLGTAIAEQPFYVNAKQYYRILKRRYAR	HAP2	P06774	125	0.0151934	1.02653	0.0811619	0.0206782	0.0110495	0.01535	1.255	0.921921	0.934928	0.0140954	1.25799	0.936518	0.0164935	0.012046	1.2972	1.21997	CAGCAGCAACAGCAACAACAGCAGTTGGTGGTCCAGGCCCAGTACACCCAGAATCAGCCAAACCTGCAGAGCGACGTTCTGGGCACAGCTATTGCAGAGCAGCCCTTCTATGTGAACGCCAAACAGTATTACAGGATCCTCAAGAGACGCTACGCGCGG
A_tiles_P06774:137	AQYTQNQPNLQSDVLGTAIAEQPFYVNAKQYYRILKRRYARAKLEEKLRISRE	HAP2	P06774	137	0.0171619	1.15953	0.458776	0.0249688	0.0135991	0.0148863	1.51541	1.13465	0.906681	0.0174919	1.56112	1.81743	0.0188773	0.0162082	1.48468	1.64149	GCCCAGTACACCCAGAACCAGCCCAACCTGCAAAGCGACGTCTTGGGCACAGCCATTGCTGAACAGCCTTTCTACGTGAATGCAAAGCAGTACTATCGCATCCTCAAAAGACGCTATGCGAGGGCCAAACTGGAGGAGAAGCTGCGGATCTCCCGGGAG
A_tiles_P06774:150	VLGTAIAEQPFYVNAKQYYRILKRRYARAKLEEKLRISRERKPYLHESRHKHA	HAP2	P06774	150	0.0185766	1.25511	0.70429	0.0331049	0.0179161	0.0108083	2.0092	1.49484	0.658305	0.0239564	2.13806	3.10072	0.0272851	0.0210338	2.14594	2.13021	GTCCTGGGCACCGCCATCGCCGAGCAGCCCTTCTACGTGAACGCCAAGCAATACTATCGGATTCTGAAGAGAAGATACGCGCGGGCAAAATTGGAGGAAAAACTCCGCATCTCCAGGGAAAGGAAGCCTTATCTGCATGAGAGCCGCCACAAGCACGCT
A_tiles_P06774:162	VNAKQYYRILKRRYARAKLEEKLRISRERKPYLHESRHKHAMRRPRGEGGRFL	HAP2	P06774	162	0.0253775	1.71461	1.67123	0.0300732	0.0213143	0.0254974	1.82521	1.77836	1.55297	0.022826	2.03718	2.90349	0.0254345	0.0204851	2.00039	2.07464	GTGAACGCCAAGCAGTACTACCGGATCCTGAAGCGCAGGTACGCAAGAGCTAAGCTGGAAGAGAAACTGCGGATTAGCAGAGAGCGGAAACCTTATCTCCATGAATCCAGACACAAGCACGCCATGAGGAGGCCCCGCGGGGAGGGCGGACGCTTCTTG
A_tiles_P06774:175	YARAKLEEKLRISRERKPYLHESRHKHAMRRPRGEGGRFLTAAEIKAMKSKKS	HAP2	P06774	175	0.0308041	2.08126	2.27188	0.0327824	0.0282315	0.0315828	1.98963	2.3555	1.92362	0.0181627	1.62099	1.97099	0.0204087	0.0161639	1.60512	1.63701	TACGCGAGAGCCAAGCTGGAGGAGAAACTCCGGATTTCCCGCGAGAGAAAACCTTATTTGCACGAAAGCCGGCATAAACACGCTATGAGGAGGCCCCGCGGGGAAGGAGGCCGCTTCCTGACCGCAGCCGAGATCAAGGCCATGAAGAGTAAGAAGTCT
A_tiles_P06774:187	SRERKPYLHESRHKHAMRRPRGEGGRFLTAAEIKAMKSKKSGASDDPDDSHED	HAP2	P06774	187	0.0140413	0.948692	-0.163257	0.0163285	0.0156273	0.0108491	0.99101	1.30387	0.660791	0.0127862	1.14114	0.538745	0.0126118	0.0129631	0.9919	1.31284	TCTAGGGAGCGCAAGCCATACCTCCACGAGTCCAGACACAAGCATGCTATGAGGCGGCCTCGCGGGGAAGGTGGACGGTTCCTGACCGCGGCCGAAATCAAAGCAATGAAGTCAAAAAAGAGTGGCGCCAGCGATGATCCCGACGACAGCCACGAGGAC
A_tiles_P06774:200	KHAMRRPRGEGGRFLTAAEIKAMKSKKSGASDDPDDSHEDKKITTKIIQEQPH	HAP2	P06774	200	0.0151186	1.02148	0.0658636	0.0114754	0.0154571	0.0194823	0.696468	1.28966	1.18661	0.0125118	1.11665	0.450213	0.0128392	0.0121927	1.00979	1.23483	AAGCACGCCATGCGCAGGCCCCGGGGCGAAGGTGGGAGATTCCTGACTGCAGCGGAGATTAAAGCCATGAAGTCTAAAAAGAGCGGAGCTAGTGATGACCCTGACGATTCCCACGAGGACAAAAAGATAACAACCAAGATCATCCAGGAGCAGCCACAT
A_tiles_P06774:212	RFLTAAEIKAMKSKKSGASDDPDDSHEDKKITTKIIQEQPHATSTAAAADKKT	HAP2	P06774	212	0.00978245	0.660943	-1.28348	0.00906443	0.00836086	0.0123524	0.550139	0.697591	0.752349	0.00803243	0.716878	-1.35817	0.00943827	0.00683599	0.742308	0.69232	CGCTTCCTGACCGCTGCCGAGATCAAGGCCATGAAATCCAAGAAAAGCGGCGCTTCAGATGATCCAGACGACTCTCACGAGGACAAGAAGATCACAACCAAGATTATACAGGAACAGCCCCATGCAACGAGTACTGCAGCCGCCGCGGACAAAAAGACC
A_tiles_P06774:25	STAAASRSPSLQEKPIEMPLDMGKAPSPRGEDQRVTNEEDLFLFNRLRASQNR	HAP2	P06774	25	0.0126987	0.857976	-0.474785	0.0113031	0.0115596	0.0156724	0.686006	0.96448	0.954563	0.00929525	0.829582	-0.762359	0.0101837	0.0084843	0.800936	0.859253	TCCACAGCGGCCGCCTCCAGGTCACCCAGCCTGCAGGAGAAGCCCATCGAAATGCCATTGGACATGGGCAAAGCACCTTCTCCGCGGGGAGAAGATCAGCGCGTGACCAATGAGGAGGACCTGTTTCTGTTCAACCGCCTCAGAGCTAGTCAAAACCGG
A_tiles_P06774:37	EKPIEMPLDMGKAPSPRGEDQRVTNEEDLFLFNRLRASQNRVMDSLEPQQQSQ	HAP2	P06774	37	0.0108999	0.736443	-0.948224	0.012488	0.00784218	0.0132232	0.757921	0.654315	0.805391	0.00777654	0.694041	-1.49027	0.00905916	0.00667552	0.712492	0.676068	GAGAAGCCCATCGAGATGCCCTTGGACATGGGCAAAGCTCCTAGCCCAAGAGGAGAGGACCAGCGGGTCACCAACGAAGAAGATCTGTTCCTGTTTAATCGCCTCCGCGCCTCCCAGAACAGGGTGATGGACTCTCTGGAGCCGCAACAGCAGAGTCAG
A_tiles_P06774:50	PSPRGEDQRVTNEEDLFLFNRLRASQNRVMDSLEPQQQSQYTSSSVSTMEPSA	HAP2	P06774	50	0.0118316	0.799392	-0.694	0.012113	0.00966066	0.0141538	0.735161	0.80604	0.862067	0.0071952	0.642158	-1.80731	0.00798746	0.00648153	0.628204	0.656422	CCCAGCCCGCGCGGCGAGGACCAGCGGGTGACGAACGAAGAGGACCTCTTCTTGTTTAACAGGCTGAGAGCTAGCCAGAATCGCGTGATGGATTCCCTGGAACCTCAACAGCAGTCTCAGTACACCTCAAGTAGCGTCTCCACAATGGAGCCATCCGCC
A_tiles_P06774:62	EEDLFLFNRLRASQNRVMDSLEPQQQSQYTSSSVSTMEPSADFTSFSAVTTLP	HAP2	P06774	62	0.018014	1.2171	0.608973	0.0174537	0.0142065	0.0235752	1.0593	1.18532	1.4359	0.00873579	0.779652	-1.01565	0.00989355	0.00771351	0.778115	0.781191	GAGGAGGACCTCTTCCTGTTCAACCGGCTGCGCGCCTCCCAGAATAGAGTCATGGATTCTTTGGAACCCCAGCAACAGAGCCAGTACACCAGCTCCTCAGTGTCTACTATGGAGCCAAGTGCTGACTTTACATCCTTCAGCGCAGTGACGACCCTGCCT
A_tiles_P06774:75	QNRVMDSLEPQQQSQYTSSSVSTMEPSADFTSFSAVTTLPPPPHQQQQQQQQQ	HAP2	P06774	75	0.00951374	0.642789	-1.36981	0.00918255	0.00870852	0.0107683	0.557308	0.726597	0.655866	0.00999043	0.891626	-0.46806	0.0130289	0.00766057	1.02471	0.775829	CAGAACAGGGTGATGGACTCACTCGAGCCCCAGCAGCAGTCCCAGTACACAAGTTCCAGCGTGAGCACCATGGAACCTAGCGCTGATTTTACCTCTTTCTCCGCCGTCACGACTCTGCCTCCACCCCCGCACCAGCAACAACAGCAGCAGCAACAGCAG
A_tiles_P06774:87	QSQYTSSSVSTMEPSADFTSFSAVTTLPPPPHQQQQQQQQQQQQQQLVVQAQY	HAP2	P06774	87	0.00971493	0.656382	-1.30495	0.0127832	0.00898359	0.00798418	0.775838	0.749548	0.486294	0.00986065	0.880043	-0.521414	0.00856649	0.0113503	0.673744	1.14951	CAGTCCCAGTACACCAGCTCATCCGTTTCTACGATGGAGCCCAGCGCAGACTTCACTTCTTTTAGTGCCGTGACAACCCTGCCTCCACCGCCCCACCAGCAGCAACAACAACAGCAGCAACAGCAACAGCAGCAGCAGTTAGTCGTGCAGGCTCAGTAT
A_tiles_P07248:0	MANVEKPNDCSGFPVVDLNSCFSNGFNNEKQEIEMETDDSPILLMSSSASREN	ADR1	P07248	0	0.0237212	1.6027	1.46203	0.0216758	0.0251525	0.0244822	1.31555	2.09861	1.49114	0.0112675	1.0056	0.0227761	0.0126341	0.0100487	0.993653	1.01769	ATGGCTAACGTGGAGAAACCCAATGACTGTTCCGGCTTTCCTGTGGTCGATCTGAATTCTTGCTTCTCAAATGGGTTCAACAACGAGAAGCAGGAGATCGAAATGGAAACCGATGACAGCCCAATTCTGCTCATGTCCAGTTCCGCCAGCCGCGAGAAC
A_tiles_P07248:1011	DSFLNSVRLNFLKNYSVEVLCEFLVALNFSIRNISSLYVEEESDCSQRMNSPE	ADR1	P07248	1011	0.0116775	0.78898	-0.734637	0.0119345	0.00927424	0.0143869	0.724327	0.773798	0.876265	0.0130051	1.16068	0.607998	0.0130007	0.0130095	1.02249	1.31754	GACAGCTTCCTGAACTCTGTGCGGCTCAACTTTCTGAAGAATTATAGCGTCGAGGTGTTGTGTGAGTTTCTGGTGGCCCTCAATTTCAGCATCAGGAACATTAGTTCCCTGTACGTTGAAGAAGAGTCCGATTGCTCCCAGCGCATGAACTCACCCGAG
A_tiles_P07248:1024	NYSVEVLCEFLVALNFSIRNISSLYVEEESDCSQRMNSPELPRIHLNNQALSV	ADR1	P07248	1024	0.011274	0.761717	-0.843634	0.0142743	0.00887403	0.0113124	0.866338	0.740407	0.689006	0.0151063	1.34821	1.21914	0.0158798	0.0143706	1.24893	1.45539	AACTACAGCGTGGAGGTGCTGTGCGAGTTTCTCGTCGCCTTGAATTTCAGCATTCGCAACATCTCCTCTCTGTATGTGGAGGAAGAGAGTGACTGTTCACAGAGAATGAATTCCCCTGAACTGCCCAGGATCCACCTGAACAACCAGGCTCTCTCCGTT
A_tiles_P07248:1037	LNFSIRNISSLYVEEESDCSQRMNSPELPRIHLNNQALSVFNLQGYYYCFILI	ADR1	P07248	1037	0.0095312	0.643968	-1.36413	0.0121238	0.0086291	0.00827636	0.735817	0.719971	0.50409	0.0141247	1.2606	0.944987	0.0168725	0.0118244	1.327	1.19753	CTGAACTTCTCCATCCGCAACATATCCAGCCTCTACGTCGAGGAGGAAAGTGACTGTTCTCAGAGGATGAATAGCCCTGAGTTGCCCAGAATCCACCTGAACAATCAGGCCCTGTCAGTGTTTAACCTGCAAGGCTATTACTACTGCTTCATTCTCATC
A_tiles_P07248:104	VCEVCTRAFARQEHLKRHYRSHTNEKPYPCGLCNRCFTRRDLLIRHAQKIHSG	ADR1	P07248	104	0.0125522	0.848076	-0.510757	0.0109338	0.013371	0.0135275	0.663596	1.11562	0.823922	0.0120555	1.07593	0.29862	0.0164767	0.00882063	1.29587	0.893316	GTGTGCGAGGTCTGCACTAGGGCTTTTGCCCGGCAGGAGCACCTCAAAAGACATTATCGGTCCCATACCAACGAAAAGCCTTACCCCTGTGGCTTGTGCAATAGATGTTTCACAAGGCGCGACCTGCTGATTCGCCACGCACAGAAGATCCACAGCGGG
A_tiles_P07248:1050	EEESDCSQRMNSPELPRIHLNNQALSVFNLQGYYYCFILIIKFLLDFEATPNF	ADR1	P07248	1050	0.0173245	1.17051	0.488004	0.016395	0.0143295	0.0221328	0.995048	1.19559	1.34805	0.0151857	1.35529	1.24052	0.0168084	0.0137196	1.32196	1.38946	GAGGAGGAAAGCGATTGTAGTCAGAGGATGAACTCTCCTGAACTCCCACGCATTCACCTGAATAATCAAGCTCTCTCCGTGTTTAACCTGCAGGGCTATTACTACTGCTTCATCCTGATCATAAAGTTCTTGCTGGACTTCGAGGCCACCCCCAACTTT
A_tiles_P07248:1063	ELPRIHLNNQALSVFNLQGYYYCFILIIKFLLDFEATPNFKLLRIFIELRSLA	ADR1	P07248	1063	0.0106863	0.722011	-1.00957	0.0113157	0.00868787	0.0124133	0.686772	0.724875	0.756058	0.0128564	1.1474	0.561069	0.0130968	0.0126203	1.03005	1.27813	GAGCTGCCCCGCATTCACCTGAATAACCAGGCACTGAGCGTGTTTAACCTCCAGGGCTATTACTACTGCTTCATCCTCATCATTAAGTTCCTCCTGGACTTCGAAGCCACCCCTAACTTTAAACTGCTGAGGATATTCATCGAGTTGCGGTCCTTGGCT
A_tiles_P07248:1076	VFNLQGYYYCFILIIKFLLDFEATPNFKLLRIFIELRSLANSILLPTLSRLYP	ADR1	P07248	1076	0.0112761	0.761858	-0.843064	0.011036	0.00960517	0.0135255	0.669797	0.80141	0.823803	0.0140955	1.25799	0.936531	0.0163486	0.0121529	1.2858	1.23079	GTGTTCAACCTGCAGGGCTATTACTACTGCTTCATCCTGATTATAAAGTTCCTGCTCGACTTCGAGGCCACCCCAAATTTTAAACTGTTGCGCATTTTTATCGAACTGCGGTCCCTCGCTAACTCTATCTTGCTGCCCACACTCAGCAGGCTGTACCCT
A_tiles_P07248:1089	IIKFLLDFEATPNFKLLRIFIELRSLANSILLPTLSRLYPQEFSGFPDVVFTQ	ADR1	P07248	1089	0.010405	0.703007	-1.09225	0.00928964	0.00866275	0.0139982	0.563807	0.722779	0.852593	0.0117449	1.04821	0.192114	0.0113506	0.0121529	0.89271	1.23079	ATTATCAAGTTCCTGTTGGACTTCGAGGCCACTCCTAACTTTAAACTCCTCCGGATCTTTATCGAACTCAGGAGCCTGGCTAATAGTATACTGCTGCCAACACTGTCCCGCCTGTACCCGCAGGAGTTTTCTGGCTTCCCCGATGTCGTGTTCACCCAG
A_tiles_P07248:1102	FKLLRIFIELRSLANSILLPTLSRLYPQEFSGFPDVVFTQQFINKDNGMLVPG	ADR1	P07248	1102	0.0116546	0.787432	-0.740723	0.0111812	0.00995791	0.0142178	0.67861	0.830841	0.865967	0.0164444	1.46763	1.56545	0.0166384	0.0162526	1.30859	1.646	TTCAAGCTCCTCCGGATCTTCATTGAGCTGCGCAGTCTGGCCAACTCTATACTGTTGCCTACCCTGTCCAGACTCTACCCACAAGAATTTAGCGGATTTCCCGATGTGGTCTTCACACAGCAGTTCATCAACAAAGACAATGGCATGCTGGTGCCGGGG
A_tiles_P07248:1114	LANSILLPTLSRLYPQEFSGFPDVVFTQQFINKDNGMLVPGLSANEHHNGASA	ADR1	P07248	1114	0.0156457	1.05709	0.172082	0.0192419	0.0125831	0.0158178	1.16783	1.04987	0.963419	0.010874	0.970481	-0.122263	0.0132259	0.00894029	1.0402	0.905434	CTCGCAAACTCCATTCTGTTGCCTACCCTCAGCAGACTGTACCCACAAGAATTTAGTGGTTTCCCGGACGTGGTCTTCACACAGCAGTTCATCAATAAGGATAATGGGATGCTGGTGCCCGGACTGTCTGCCAACGAGCATCACAACGGCGCCTCAGCT
A_tiles_P07248:1127	YPQEFSGFPDVVFTQQFINKDNGMLVPGLSANEHHNGASAAVKTKLAKKINVE	ADR1	P07248	1127	0.0172984	1.16875	0.483334	0.0177063	0.015038	0.0194401	1.07463	1.2547	1.18404	0.0101211	0.903292	-0.415018	0.0107315	0.00954553	0.844017	0.96673	TACCCTCAGGAGTTCTCCGGCTTTCCCGACGTGGTCTTCACCCAACAGTTCATTAACAAAGATAACGGGATGCTCGTTCCAGGACTGTCTGCTAATGAACACCATAATGGTGCAAGCGCGGCCGTGAAAACAAAGCTGGCCAAGAAGATCAACGTGGAG
A_tiles_P07248:1140	TQQFINKDNGMLVPGLSANEHHNGASAAVKTKLAKKINVEGLAMFINEILVNS	ADR1	P07248	1140	0.0209046	1.4124	1.07025	0.0244032	0.0195772	0.0191217	1.48108	1.63343	1.16465	0.0108336	0.966877	-0.137446	0.0136064	0.00862586	1.07013	0.873589	ACCCAGCAGTTTATAAACAAGGACAATGGCATGCTGGTGCCCGGACTCAGCGCTAATGAACATCACAATGGTGCCTCCGCAGCCGTGAAAACAAAATTGGCCAAGAAGATTAACGTTGAGGGGCTGGCGATGTTCATCAACGAGATCCTGGTCAACTCT
A_tiles_P07248:1153	PGLSANEHHNGASAAVKTKLAKKINVEGLAMFINEILVNSFNDTSFLNMEDPI	ADR1	P07248	1153	0.0219157	1.48072	1.21665	0.0274393	0.0159485	0.0240532	1.66535	1.33066	1.46502	0.014455	1.29008	1.03931	0.0157017	0.0133074	1.23492	1.34772	CCCGGGCTGAGTGCCAATGAACACCATAATGGCGCTAGCGCGGCAGTCAAAACAAAGTTGGCCAAGAAGATAAATGTGGAGGGACTGGCCATGTTCATCAACGAGATTCTGGTGAACTCTTTTAACGACACCTCCTTCCTCAACATGGAGGATCCTATC
A_tiles_P07248:1166	AAVKTKLAKKINVEGLAMFINEILVNSFNDTSFLNMEDPIRNEFSFDNGDRAV	ADR1	P07248	1166	0.0312035	2.10824	2.31181	0.0456999	0.0213501	0.0311383	2.77362	1.78135	1.89655	0.0138667	1.23757	0.869755	0.0164082	0.0117188	1.29048	1.18683	GCCGCGGTGAAGACAAAACTGGCTAAGAAGATTAATGTGGAGGGGCTCGCAATGTTCATCAACGAGATATTGGTCAACAGCTTTAACGACACCTCCTTCCTGAACATGGAAGACCCCATCAGAAATGAGTTTTCTTTCGACAATGGCGATCGCGCCGTT
A_tiles_P07248:117	HLKRHYRSHTNEKPYPCGLCNRCFTRRDLLIRHAQKIHSGNLGETISHTKKVS	ADR1	P07248	117	0.0195686	1.32214	0.865546	0.022147	0.0157091	0.0215384	1.34415	1.31069	1.31184	0.0210656	1.88007	2.576	0.0230754	0.0192309	1.81485	1.94762	CACCTGAAGCGCCACTACAGGAGTCACACTAACGAAAAACCCTATCCTTGCGGACTGTGCAATCGGTGTTTCACACGCAGAGACCTCTTGATTCGGCATGCCCAGAAAATCCATTCTGGGAACCTGGGCGAGACGATCAGCCACACCAAGAAGGTGTCC
A_tiles_P07248:1179	EGLAMFINEILVNSFNDTSFLNMEDPIRNEFSFDNGDRAVTDLPRSAHFLSDT	ADR1	P07248	1179	0.0515068	3.48001	3.86525	0.0586232	0.0398136	0.0585452	3.55797	3.32186	3.56582	0.0127117	1.1345	0.514905	0.0134383	0.0120244	1.05691	1.21778	GAGGGGCTGGCCATGTTCATCAACGAGATTCTGGTCAACTCTTTCAACGACACCTCATTCCTCAATATGGAAGACCCTATCCGGAACGAGTTTAGTTTTGATAATGGCGATAGGGCTGTGACAGACCTGCCCCGCTCCGCACACTTCTTGAGCGACACT
A_tiles_P07248:1192	SFNDTSFLNMEDPIRNEFSFDNGDRAVTDLPRSAHFLSDTGLEGINFSGLNDS	ADR1	P07248	1192	0.0429854	2.90427	3.30468	0.039157	0.0378151	0.0536397	2.37652	3.15512	3.26705	0.0103568	0.924327	-0.321088	0.0122586	0.00875007	0.964127	0.886169	AGCTTCAACGACACCTCATTCCTCAACATGGAGGACCCTATTCGGAACGAGTTCTCCTTTGATAATGGCGATCGCGCCGTGACTGATTTGCCCAGAAGTGCTCACTTTCTGTCCGACACAGGACTGGAAGGCATCAATTTCAGCGGGCTGAACGACTCT
A_tiles_P07248:1205	IRNEFSFDNGDRAVTDLPRSAHFLSDTGLEGINFSGLNDSHQTVSTLNLLRYG	ADR1	P07248	1205	0.029968	2.02476	2.18658	0.0345458	0.0225818	0.0344998	2.09666	1.88412	2.10129	0.0086495	0.77195	-1.05616	0.0128984	0.00580024	1.01444	0.587423	ATCCGCAACGAATTCAGCTTCGACAACGGCGATAGAGCCGTGACGGATCTCCCTCGGTCTGCTCATTTTCTGAGTGACACAGGACTGGAGGGCATTAATTTTTCCGGTCTGAATGACTCACACCAGACTGTCTCCACCCTCAACTTGCTGAGGTACGGG
A_tiles_P07248:1218	VTDLPRSAHFLSDTGLEGINFSGLNDSHQTVSTLNLLRYGENHSSKHKNGGKG	ADR1	P07248	1218	0.0146168	0.987576	-0.038751	0.0171545	0.010277	0.0177139	1.04114	0.857468	1.07891	0.00973187	0.86855	-0.575055	0.0103187	0.00917839	0.811555	0.929548	GTGACGGACTTGCCCCGCTCAGCCCACTTCCTGAGTGACACTGGACTCGAAGGGATCAATTTTTCTGGCCTGAACGATAGCCACCAGACAGTCTCCACCCTGAATCTGCTCAGATACGGTGAGAACCATAGCTCCAAACACAAGAACGGCGGCAAGGGG
A_tiles_P07248:1231	TGLEGINFSGLNDSHQTVSTLNLLRYGENHSSKHKNGGKGQGFAEKYQLSLKY	ADR1	P07248	1231	0.0143555	0.96992	-0.0946664	0.0143665	0.00993026	0.0207369	0.871935	0.828534	1.26303	0.0112222	1.00156	0.00636038	0.0127205	0.0099004	1.00045	1.00267	ACCGGGCTGGAGGGCATCAACTTCTCTGGCCTCAACGACTCACACCAAACAGTGTCCACTTTGAATCTGCTCAGATACGGGGAAAACCACAGCTCCAAGCATAAAAATGGTGGAAAAGGACAGGGCTTTGCCGAGAAGTATCAGCTGAGTCTGAAGTAC
A_tiles_P07248:1244	SHQTVSTLNLLRYGENHSSKHKNGGKGQGFAEKYQLSLKYVTIAKLFFTNVKE	ADR1	P07248	1244	0.0106147	0.717171	-1.03042	0.0113091	0.00904462	0.0116922	0.686374	0.75464	0.712142	0.0130626	1.16581	0.626013	0.0130582	0.013067	1.02701	1.32337	TCTCACCAGACAGTGTCCACTTTGAACCTCCTGAGATACGGGGAAAACCACAGTAGCAAGCATAAAAATGGCGGAAAGGGTCAAGGCTTTGCTGAGAAATACCAGCTCTCACTGAAATATGTCACGATCGCCAAGCTGTTCTTCACCAACGTGAAGGAG
A_tiles_P07248:1257	GENHSSKHKNGGKGQGFAEKYQLSLKYVTIAKLFFTNVKENYIHCHMLDKMAS	ADR1	P07248	1257	0.0130034	0.878562	-0.401293	0.0172604	0.00952947	0.0133675	1.04757	0.795094	0.814174	0.0130819	1.16753	0.632037	0.0135433	0.0126362	1.06517	1.27974	GGCGAGAACCACAGTTCCAAACATAAAAACGGCGGGAAAGGTCAGGGATTTGCTGAAAAGTATCAGCTGTCTCTCAAGTACGTCACAATTGCCAAGCTGTTCTTCACCAACGTGAAGGAGAATTACATCCACTGCCACATGTTGGACAAGATGGCAAGC
A_tiles_P07248:1270	GQGFAEKYQLSLKYVTIAKLFFTNVKENYIHCHMLDKMASDFHTLENHLKGNS	ADR1	P07248	1270	0.0157623	1.06497	0.195096	0.0184427	0.0121448	0.0174841	1.11932	1.01331	1.06491	0.0118908	1.06123	0.242512	0.01284	0.0110118	1.00985	1.11523	GGGCAGGGATTTGCCGAAAAGTACCAGCTCTCCCTGAAATACGTCACAATTGCTAAGCTGTTCTTCACCAACGTGAAGGAGAACTATATCCATTGCCACATGCTCGATAAGATGGCATCTGACTTCCACACTTTGGAGAATCACCTGAAAGGCAACAGC
A_tiles_P07248:13	PVVDLNSCFSNGFNNEKQEIEMETDDSPILLMSSSASRENSNTFSVIQRTPDG	ADR1	P07248	13	0.0122834	0.829919	-0.577839	0.0118558	0.00979943	0.0159523	0.719555	0.817618	0.971611	0.00845085	0.754221	-1.15096	0.00831026	0.00859382	0.653592	0.870345	CCAGTCGTGGACCTGAACTCATGCTTCAGCAACGGCTTCAACAATGAGAAGCAGGAGATCGAGATGGAAACAGACGATAGCCCTATTCTGCTCATGTCTTCCAGCGCCTCCCGCGAAAATAGTAACACCTTTTCCGTGATCCAGCGGACTCCCGACGGG
A_tiles_P07248:130	PYPCGLCNRCFTRRDLLIRHAQKIHSGNLGETISHTKKVSRTITKARKNSASS	ADR1	P07248	130	0.0190679	1.28831	0.785209	0.0213594	0.0187008	0.0173565	1.29635	1.5603	1.05713	0.0159449	1.42305	1.43958	0.0175751	0.0144658	1.38226	1.46504	CCCTACCCTTGCGGCCTGTGCAATCGGTGTTTCACTCGCCGCGACTTGCTGATAAGACATGCTCAGAAAATTCACTCAGGAAACCTCGGGGAGACGATCTCTCACACAAAAAAGGTGTCCAGGACCATCACCAAGGCACGGAAGAACAGTGCCAGCAGC
A_tiles_P07248:143	RDLLIRHAQKIHSGNLGETISHTKKVSRTITKARKNSASSVKFQTPTYGTPDN	ADR1	P07248	143	0.0133681	0.903204	-0.315555	0.0152892	0.00997118	0.0156703	0.927933	0.831948	0.954431	0.0096139	0.858021	-0.624822	0.0103777	0.00890632	0.816192	0.901994	CGCGATCTGCTGATCAGACACGCTCAGAAGATACACTCCGGGAACCTCGGAGAGACGATTAGTCATACCAAGAAAGTCAGCCGGACTATCACAAAGGCAAGGAAAAATTCCGCCTCTTCAGTGAAGTTCCAGACACCTACCTACGGCACCCCCGACAAC
A_tiles_P07248:156	GNLGETISHTKKVSRTITKARKNSASSVKFQTPTYGTPDNGNFLNRTTANTRR	ADR1	P07248	156	0.015891	1.07366	0.220308	0.016607	0.01233	0.0195975	1.00791	1.02875	1.19363	0.0124461	1.11079	0.428733	0.0135857	0.0114021	1.0685	1.15476	GGAAACCTGGGCGAGACGATCAGTCACACCAAGAAAGTGTCTAGAACAATTACTAAGGCCAGGAAGAACTCCGCATCAAGCGTCAAATTTCAGACGCCCACATACGGTACCCCTGACAATGGGAATTTCCTCAACCGCACCACTGCTAACACCCGCCGG
A_tiles_P07248:168	VSRTITKARKNSASSVKFQTPTYGTPDNGNFLNRTTANTRRKASPEANVKRKY	ADR1	P07248	168	0.0129788	0.876901	-0.407161	0.0123931	0.0108997	0.0161848	0.752165	0.909415	0.985771	0.0154759	1.38119	1.31776	0.0182307	0.0131373	1.43382	1.33049	GTGTCCAGAACCATCACGAAGGCTCGGAAGAACTCAGCCTCTAGCGTCAAATTTCAGACCCCTACTTATGGAACACCAGACAATGGCAACTTCCTGAACAGGACAACCGCAAATACTCGCCGCAAAGCCAGTCCCGAGGCGAACGTGAAGCGGAAGTAC
A_tiles_P07248:181	SSVKFQTPTYGTPDNGNFLNRTTANTRRKASPEANVKRKYLKKLTRRASFSAQ	ADR1	P07248	181	0.0157037	1.06101	0.183552	0.0160457	0.0115175	0.0209549	0.973849	0.960967	1.27631	0.0145321	1.29696	1.06101	0.0167861	0.0125808	1.32021	1.27413	TCATCCGTGAAGTTCCAGACCCCTACCTACGGCACCCCCGACAACGGAAATTTTCTGAACCGGACAACTGCGAACACAAGACGGAAAGCCAGCCCAGAGGCTAATGTCAAACGCAAGTATCTGAAGAAGCTCACGCGCAGGGCAAGTTTCTCTGCCCAG
A_tiles_P07248:194	DNGNFLNRTTANTRRKASPEANVKRKYLKKLTRRASFSAQSASSYALPDQSSL	ADR1	P07248	194	0.0145304	0.981735	-0.0571354	0.0164626	0.0109488	0.0170204	0.999152	0.913512	1.03666	0.0129728	1.1578	0.597859	0.0141558	0.0118887	1.11333	1.20403	GATAACGGCAACTTCCTGAACCGCACAACGGCCAATACTCGGCGGAAAGCTTCTCCCGAGGCCAATGTGAAAAGAAAGTATTTGAAGAAGCTCACCAGGCGCGCATCCTTTAGCGCTCAGAGTGCCTCCAGCTACGCGCTGCCTGACCAGTCATCCCTG
A_tiles_P07248:207	RRKASPEANVKRKYLKKLTRRASFSAQSASSYALPDQSSLEQHPKDRVKFSTP	ADR1	P07248	207	0.00769802	0.520111	-2.02622	0.00793018	0.00694311	0.00828514	0.481299	0.5793	0.504624								CGCCGCAAGGCAAGTCCCGAGGCTAACGTGAAGAGAAAATACCTCAAAAAACTGACACGGCGGGCGTCATTTAGCGCCCAAAGCGCCTCCAGCTATGCCTTGCCAGATCAGTCCTCTCTGGAACAGCACCCGAAGGACAGGGTCAAGTTCTCCACCCCT
A_tiles_P07248:220	YLKKLTRRASFSAQSASSYALPDQSSLEQHPKDRVKFSTPELVPLDLKNPELD	ADR1	P07248	220	0.0156773	1.05922	0.178337	0.0150788	0.0135405	0.0188717	0.915166	1.12975	1.14942	0.00985262	0.879327	-0.524738	0.0108101	0.00897996	0.8502	0.909451	TACCTGAAGAAGCTGACAAGGCGGGCCTCCTTTAGCGCCCAGAGTGCAAGCTCCTATGCTTTGCCTGATCAATCCTCACTCGAACAGCACCCCAAAGATCGCGTCAAATTCTCTACCCCGGAGCTGGTGCCACTGGACCTCAAGAACCCCGAGCTGGAC
A_tiles_P07248:233	QSASSYALPDQSSLEQHPKDRVKFSTPELVPLDLKNPELDSSFDLNMNLDLNL	ADR1	P07248	233	0.0238554	1.61177	1.47952	0.0224809	0.0207401	0.0291163	1.36441	1.73045	1.77339	0.00798994	0.713086	-1.37981	0.00893067	0.0071483	0.702386	0.723948	CAGTCCGCCTCCAGCTACGCTCTGCCGGACCAGTCATCTCTGGAGCAACACCCTAAGGATAGAGTCAAGTTCAGTACCCCAGAATTGGTGCCCCTGGATCTGAAAAATCCCGAGCTCGACAGCAGCTTTGACCTGAACATGAACCTCGACCTGAACCTC
A_tiles_P07248:246	LEQHPKDRVKFSTPELVPLDLKNPELDSSFDLNMNLDLNLNLDSNFNIALNRS	ADR1	P07248	246	0.0200185	1.35253	0.935997	0.0197076	0.0153386	0.0265383	1.1961	1.27978	1.61637	0.0108047	0.964301	-0.148329	0.0116262	0.0100413	0.914385	1.01694	CTGGAGCAGCACCCCAAGGACCGCGTGAAGTTTTCAACCCCTGAACTCGTCCCACTCGATTTGAAAAACCCGGAGTTGGATTCTTCCTTCGACCTGAACATGAACCTGGACCTGAATCTGAATCTCGACAGCAATTTCAACATCGCCCTGAACCGGAGT
A_tiles_P07248:259	PELVPLDLKNPELDSSFDLNMNLDLNLNLDSNFNIALNRSDSSGSTMNLDYKL	ADR1	P07248	259	0.0335284	2.26532	2.53455	0.0387743	0.025202	0.0385709	2.3533	2.10273	2.34925	0.00861156	0.768565	-1.07409	0.00960761	0.00771879	0.755626	0.781725	CCCGAACTGGTGCCACTGGATCTCAAAAATCCTGAGCTGGATAGCTCTTTCGACCTGAACATGAATCTGGACCTCAACCTCAACTTGGACAGCAACTTTAACATCGCCCTGAATAGATCCGATTCATCCGGCAGTACCATGAACCTGGACTACAAGTTG
A_tiles_P07248:26	NNEKQEIEMETDDSPILLMSSSASRENSNTFSVIQRTPDGKIITTNNNMNSKI	ADR1	P07248	26	0.0115352	0.779368	-0.77263	0.0101837	0.0100736	0.0149619	0.618073	0.840491	0.911287	0.00801875	0.715658	-1.36512	0.00984707	0.0065299	0.77446	0.66132	AACAACGAGAAGCAGGAGATCGAGATGGAAACTGATGACAGTCCTATACTCCTGATGTCCTCTTCCGCCAGCAGAGAAAATTCAAATACCTTCTCCGTGATTCAGCGCACACCCGACGGCAAAATCATTACCACGAATAACAACATGAACAGCAAGATC
A_tiles_P07248:272	DSSFDLNMNLDLNLNLDSNFNIALNRSDSSGSTMNLDYKLPESANNYTYSSGS	ADR1	P07248	272	0.0252876	1.70854	1.66024	0.0250006	0.0189749	0.0340875	1.51734	1.58318	2.07617	0.00949972	0.847831	-0.673573	0.0109937	0.00820874	0.864643	0.831345	GACTCCTCCTTCGATCTGAACATGAATCTCGACCTGAACTTGAACCTCGACAGCAACTTTAACATCGCCCTGAATAGAAGCGATTCAAGCGGCAGTACCATGAATCTGGACTATAAGCTGCCCGAGAGTGCTAATAACTACACATACTCCTCTGGGTCT
A_tiles_P07248:285	LNLDSNFNIALNRSDSSGSTMNLDYKLPESANNYTYSSGSPTRAYVGANTNSK	ADR1	P07248	285	0.013769	0.930291	-0.223966	0.0127948	0.0114049	0.0178888	0.77654	0.951575	1.08956	0.00999811	0.892311	-0.464925	0.0114198	0.0087534	0.898154	0.886507	CTGAACCTGGACAGTAACTTCAACATCGCCCTGAATCGCTCTGATTCTTCCGGCAGCACTATGAATTTGGACTACAAACTCCCTGAGAGCGCTAATAACTACACATATTCCTCCGGGAGCCCCACGAGAGCATACGTGGGAGCCAACACCAACTCAAAG
A_tiles_P07248:298	SDSSGSTMNLDYKLPESANNYTYSSGSPTRAYVGANTNSKNASFNDADLLSSS	ADR1	P07248	298	0.0150138	1.0144	0.0443058	0.0117779	0.0144959	0.0198225	0.714827	1.20947	1.20733	0.0073697	0.657731	-1.70954	0.0078928	0.00688126	0.620759	0.696905	TCCGACTCCTCCGGCAGCACCATGAACCTGGATTACAAACTCCCTGAGAGCGCTAATAACTACACTTACAGTAGCGGGAGCCCCACGAGAGCCTATGTGGGAGCAAATACAAATTCTAAGAACGCGAGTTTCAACGACGCCGACTTGCTGTCCTCATCT
A_tiles_P07248:311	LPESANNYTYSSGSPTRAYVGANTNSKNASFNDADLLSSSYWIKAYNDHLFSV	ADR1	P07248	311	0.0305849	2.06644	2.24974	0.0338605	0.0235171	0.0359288	2.05506	1.96216	2.18832	0.0159612	1.4245	1.44375	0.019872	0.01282	1.56291	1.29836	TTGCCTGAGTCCGCCAACAATTACACCTACTCCTCAGGCAGCCCCACAAGAGCTTATGTGGGAGCAAACACTAACTCTAAGAACGCCAGTTTTAATGACGCCGATCTCCTGAGCTCTTCCTATTGGATCAAAGCGTACAACGACCACCTGTTCAGCGTC
A_tiles_P07248:324	SPTRAYVGANTNSKNASFNDADLLSSSYWIKAYNDHLFSVSESDETSPMNSEL	ADR1	P07248	324	0.0332504	2.24654	2.50874	0.0341394	0.0258291	0.0416893	2.07199	2.15506	2.53918	0.0137486	1.22703	0.834852	0.0151588	0.0124696	1.19222	1.26286	AGTCCCACCCGCGCCTACGTGGGCGCTAACACTAACTCCAAGAATGCATCATTTAACGACGCCGATCTCCTGAGCTCTAGCTACTGGATCAAAGCGTATAATGACCACCTGTTCTCTGTCAGTGAATCCGACGAGACAAGCCCTATGAACTCCGAGTTG
A_tiles_P07248:337	KNASFNDADLLSSSYWIKAYNDHLFSVSESDETSPMNSELNDTKLIVPDFKST	ADR1	P07248	337	0.0396955	2.682	3.0579	0.0424179	0.0290395	0.0507794	2.57443	2.42291	3.09283	0.0102118	0.911386	-0.378616	0.0119359	0.0087368	0.938745	0.884825	AAGAATGCCTCCTTCAACGATGCTGACCTCCTGTCAAGCAGCTATTGGATTAAGGCATACAACGACCACCTGTTTTCCGTGTCTGAGAGTGATGAAACATCCCCTATGAATAGCGAGTTGAACGACACCAAACTGATCGTCCCCGACTTCAAGTCTACT
A_tiles_P07248:350	SYWIKAYNDHLFSVSESDETSPMNSELNDTKLIVPDFKSTIHHLKDSRSSSWT	ADR1	P07248	350	0.0210106	1.41956	1.08592	0.0252026	0.0166933	0.0220457	1.5296	1.39281	1.34274	0.0105415	0.940812	-0.248956	0.0124277	0.00894168	0.97742	0.905574	TCCTACTGGATTAAGGCCTATAACGACCACCTGTTTAGTGTCAGCGAAAGCGATGAGACATCTCCTATGAATTCAGAGCTCAACGATACCAAGCTGATCGTGCCCGACTTCAAATCTACTATCCATCACTTGAAGGACAGCCGCTCCAGTTCCTGGACG
A_tiles_P07248:363	VSESDETSPMNSELNDTKLIVPDFKSTIHHLKDSRSSSWTVAIDNNSNNNKVS	ADR1	P07248	363	0.0107341	0.72524	-0.99574	0.0103559	0.00942504	0.0126714	0.62852	0.78638	0.771778	0.00810982	0.723785	-1.31904	0.00883858	0.00744115	0.695143	0.753607	GTCAGCGAGTCCGATGAGACTTCTCCCATGAATTCAGAACTGAACGACACAAAGCTGATCGTTCCTGACTTCAAGTCCACCATTCACCATCTCAAAGATTCCAGATCTAGTAGTTGGACGGTGGCCATCGACAATAACAGCAATAACAACAAGGTGAGC
A_tiles_P07248:376	LNDTKLIVPDFKSTIHHLKDSRSSSWTVAIDNNSNNNKVSDNQPDFVDFQELL	ADR1	P07248	376	0.0410233	2.7717	3.15987	0.0450672	0.032249	0.0475022	2.73522	2.69071	2.89322	0.0102753	0.91705	-0.353337	0.0116157	0.00908962	0.913557	0.920557	CTGAATGACACCAAGCTCATCGTGCCCGATTTTAAGAGCACTATCCACCATCTGAAAGATTCTCGCTCATCCAGCTGGACAGTGGCCATTGACAATAACAGTAACAACAATAAGGTCTCCGACAACCAGCCTGACTTCGTTGATTTCCAGGAGCTGTTG
A_tiles_P07248:389	TIHHLKDSRSSSWTVAIDNNSNNNKVSDNQPDFVDFQELLDNDTLGNDLLETT	ADR1	P07248	389	0.086389	5.8368	5.46817	0.0830225	0.0768478	0.101053	5.03881	6.41182	6.15483	0.0126803	1.13169	0.504798	0.0148828	0.0108037	1.17051	1.09416	ACCATCCACCATCTGAAAGACAGCCGCAGTTCCTCCTGGACTGTCGCCATTGACAATAACTCTAATAACAACAAGGTGAGCGACAACCAGCCCGATTTCGTGGATTTTCAGGAATTGCTCGATAATGACACACTCGGCAACGACCTGCTGGAGACCACG
A_tiles_P07248:39	SPILLMSSSASRENSNTFSVIQRTPDGKIITTNNNMNSKINKQLDKLPENLRL	ADR1	P07248	39	0.011204	0.75699	-0.862931	0.0104133	0.00962446	0.0140332	0.632002	0.803019	0.854724	0.00685116	0.611453	-2.00724	0.00905112	0.00518592	0.71186	0.525208	TCACCTATACTGCTGATGAGCAGTTCTGCCTCCAGGGAAAATAGCAATACATTCTCCGTGATTCAGCGCACTCCAGATGGCAAGATCATCACCACGAATAACAACATGAACTCCAAGATCAACAAGCAGCTCGACAAACTCCCCGAGAACCTGCGGTTG
A_tiles_P07248:402	TVAIDNNSNNNKVSDNQPDFVDFQELLDNDTLGNDLLETTAVLKEFELLHDDS	ADR1	P07248	402	0.121614	8.21672	6.52818	0.116338	0.115475	0.133886	7.06081	9.6347	8.15461	0.0133647	1.19277	0.719307	0.016068	0.0111162	1.26373	1.1258	ACCGTGGCCATCGACAATAACAGCAACAATAACAAGGTTTCTGACAACCAGCCCGACTTCGTCGACTTTCAGGAACTGCTCGATAATGATACATTGGGCAACGATCTGCTGGAGACTACGGCTGTGCTGAAAGAGTTCGAGCTCCTGCACGACGACTCC
A_tiles_P07248:415	SDNQPDFVDFQELLDNDTLGNDLLETTAVLKEFELLHDDSVSATATSNEIDLS	ADR1	P07248	415	0.129125	8.72424	6.71395	0.129584	0.122589	0.135528	7.86474	10.2282	8.25463	0.0118729	1.05963	0.236332	0.0143268	0.00983925	1.12678	0.996477	AGTGACAACCAGCCCGACTTCGTGGACTTCCAGGAGCTGCTGGACAACGATACTCTGGGAAATGATCTGTTGGAAACCACAGCTGTGCTGAAGGAGTTTGAACTCCTCCACGATGACTCCGTCTCAGCAACCGCCACGAGCAACGAGATCGACCTCTCT
A_tiles_P07248:428	LDNDTLGNDLLETTAVLKEFELLHDDSVSATATSNEIDLSHLNLSNSPISPHK	ADR1	P07248	428	0.0199576	1.34842	0.926559	0.0192899	0.0160554	0.0256669	1.17074	1.33959	1.5633	0.0118481	1.05742	0.227816	0.013074	0.0107372	1.02825	1.08741	CTGGACAACGACACCCTGGGCAACGACCTGCTGGAGACCACTGCAGTCCTCAAGGAATTCGAACTCCTGCATGATGATTCAGTGTCTGCCACGGCTACATCCAATGAGATCGACTTGTCCCACCTGAATCTCAGCAACAGCCCTATTAGTCCCCACAAA
A_tiles_P07248:441	TAVLKEFELLHDDSVSATATSNEIDLSHLNLSNSPISPHKLIYKNKEGTNDDM	ADR1	P07248	441	0.0133117	0.899397	-0.328647	0.0150063	0.00965401	0.0162825	0.910766	0.805485	0.991723	0.00831875	0.742432	-1.21525	0.00891569	0.00776178	0.701208	0.786079	ACCGCTGTGCTGAAGGAGTTCGAGCTCCTGCATGATGATAGTGTCAGCGCCACTGCAACATCTAATGAGATTGACCTGAGCCACTTGAACCTCTCCAATTCACCCATCTCCCCTCACAAACTGATCTACAAGAACAAGGAAGGCACGAACGACGACATG
A_tiles_P07248:454	SVSATATSNEIDLSHLNLSNSPISPHKLIYKNKEGTNDDMLISFGLDHPSNRE	ADR1	P07248	454	0.0135022	0.912266	-0.284612	0.0143567	0.0113753	0.0150729	0.871339	0.949103	0.918045	0.00704214	0.628497	-1.89505	0.00795351	0.0062352	0.625533	0.631474	AGCGTGAGCGCCACCGCTACAAGCAATGAGATTGACCTGTCTCATTTGAATCTGTCCAACTCCCCTATATCCCCACACAAGCTCATCTACAAGAACAAAGAAGGGACTAACGACGACATGCTCATCTCATTCGGCCTGGATCACCCCAGTAACCGCGAG
A_tiles_P07248:467	SHLNLSNSPISPHKLIYKNKEGTNDDMLISFGLDHPSNREDDLDKLCNMTRDV	ADR1	P07248	467	0.0188148	1.27121	0.743788	0.0186896	0.0173204	0.0205751	1.13431	1.44513	1.25317	0.00828516	0.739434	-1.23176	0.00943636	0.0072744	0.742158	0.73672	AGCCATCTGAACCTCTCCAACTCTCCTATCTCACCCCACAAACTCATCTACAAGAACAAGGAGGGGACCAATGACGACATGTTGATTAGTTTCGGCCTGGATCACCCATCCAATAGAGAAGATGACCTGGATAAGCTGTGCAACATGACACGCGACGTG
A_tiles_P07248:479	HKLIYKNKEGTNDDMLISFGLDHPSNREDDLDKLCNMTRDVQAIFSQYLKGEE	ADR1	P07248	479	0.0568015	3.83775	4.16854	0.0726267	0.0463712	0.0544171	4.40787	3.86899	3.31439	0.0131067	1.16975	0.639755	0.0136245	0.0126085	1.07155	1.27694	CACAAGCTGATCTACAAGAACAAAGAGGGCACAAACGACGACATGCTCATTTCCTTTGGGTTGGATCATCCCAGCAACAGAGAAGACGATCTCGATAAACTGTGCAATATGACCCGCGACGTGCAGGCCATCTTCTCTCAGTATCTGAAGGGAGAGGAG
A_tiles_P07248:492	DMLISFGLDHPSNREDDLDKLCNMTRDVQAIFSQYLKGEESKRSLEDFLSTSN	ADR1	P07248	492	0.0373316	2.52228	2.86759	0.0460413	0.0328463	0.034403	2.79435	2.74054	2.09539	0.0144595	1.29048	1.04056	0.014935	0.0139991	1.17462	1.41776	GACATGCTGATCTCCTTCGGCCTCGACCACCCCTCTAACAGGGAAGACGATCTGGATAAGTTGTGCAACATGACACGCGATGTGCAGGCCATTTTTAGCCAGTACCTGAAAGGAGAGGAGAGTAAGCGGAGCCTCGAGGACTTCCTGTCAACCTCCAAT
A_tiles_P07248:505	REDDLDKLCNMTRDVQAIFSQYLKGEESKRSLEDFLSTSNRKEKPDSGNYTFY	ADR1	P07248	505	0.0249026	1.68252	1.61268	0.0273304	0.0222149	0.0254358	1.65874	1.8535	1.54922	0.0133884	1.19489	0.726544	0.0150569	0.0119049	1.18421	1.20567	CGGGAGGACGACCTGGACAAGTTGTGCAACATGACCCGCGATGTGCAGGCCATCTTTTCCCAGTATCTGAAAGGCGAAGAATCTAAGAGAAGCCTGGAGGACTTCCTCTCAACAAGTAATAGGAAGGAGAAACCCGATAGCGGGAACTACACTTTCTAC
A_tiles_P07248:518	DVQAIFSQYLKGEESKRSLEDFLSTSNRKEKPDSGNYTFYGLDCLTLSKISRA	ADR1	P07248	518	0.0158345	1.06984	0.209262	0.0198505	0.012908	0.0154947	1.20477	1.07698	0.943736	0.0109593	0.978097	-0.0903686	0.0119837	0.0100225	0.942503	1.01503	GACGTGCAGGCCATCTTCTCACAGTACCTGAAAGGGGAGGAGAGCAAGAGGTCCTTGGAAGATTTCCTGTCTACAAGTAATCGGAAGGAGAAACCCGACTCCGGAAACTATACCTTTTACGGCCTGGACTGCCTCACTCTCAGCAAGATTAGCCGCGCT
A_tiles_P07248:52	NSNTFSVIQRTPDGKIITTNNNMNSKINKQLDKLPENLRLNGRTPSGKLRSFV	ADR1	P07248	52	0.015124	1.02184	0.0669704	0.0151853	0.0124952	0.018232	0.921629	1.04254	1.11046	0.00744451	0.664407	-1.66832	0.0090588	0.00611789	0.712463	0.619593	AACTCTAACACGTTCTCCGTGATTCAGAGAACTCCCGACGGGAAGATAATCACCACCAATAACAACATGAACAGCAAGATCAACAAGCAGCTCGATAAACTGCCTGAGAATCTGAGGTTGAATGGACGCACACCATCAGGCAAACTGCGGAGTTTTGTC
A_tiles_P07248:531	ESKRSLEDFLSTSNRKEKPDSGNYTFYGLDCLTLSKISRALPASTVNNNQPSH	ADR1	P07248	531	0.0283702	1.91681	2.01676	0.0326448	0.0256942	0.0272232	1.98128	2.14381	1.65809	0.00829007	0.739872	-1.22934	0.00917377	0.0074915	0.721506	0.758706	GAGAGCAAGCGCAGCCTGGAGGATTTTCTCTCCACCTCCAATAGGAAGGAAAAACCTGACTCTGGCAACTACACATTCTATGGGTTGGACTGCCTCACTCTGAGTAAAATCTCCAGAGCTCTGCCAGCCAGCACGGTGAATAACAACCAGCCCTCACAC
A_tiles_P07248:544	NRKEKPDSGNYTFYGLDCLTLSKISRALPASTVNNNQPSHSIESKLFNEPMRN	ADR1	P07248	544	0.0161947	1.09418	0.278981	0.0167495	0.0119441	0.0212307	1.01656	0.996558	1.2931	0.00910718	0.812798	-0.845763	0.011948	0.00694181	0.939695	0.703037	AACCGCAAGGAGAAGCCGGACTCTGGCAATTACACCTTTTATGGGCTCGATTGCCTGACTTTGTCCAAAATTAGCAGAGCACTGCCTGCCTCAACAGTGAACAATAATCAGCCATCCCACAGTATCGAAAGCAAGCTGTTCAACGAGCCCATGCGGAAC
A_tiles_P07248:557	YGLDCLTLSKISRALPASTVNNNQPSHSIESKLFNEPMRNMCIKVLRYYEKFS	ADR1	P07248	557	0.0151878	1.02615	0.0800202	0.0169839	0.0124569	0.0165592	1.03079	1.03934	1.00857	0.0113553	1.01344	0.0544712	0.0118465	0.0108845	0.931712	1.10233	TATGGCCTCGACTGCCTGACCTTGTCTAAGATTAGCCGCGCCCTCCCTGCTAGTACAGTCAATAATAACCAGCCATCCCACTCCATCGAGAGCAAGCTGTTTAACGAACCCATGCGGAACATGTGTATCAAAGTGCTGAGGTACTACGAGAAGTTCTCA
A_tiles_P07248:570	ALPASTVNNNQPSHSIESKLFNEPMRNMCIKVLRYYEKFSHDSSESVMDSNPN	ADR1	P07248	570	0.014333	0.968398	-0.0995333	0.0148634	0.0136077	0.0145582	0.902092	1.13536	0.886697	0.00901022	0.804144	-0.88944	0.00899516	0.0090253	0.707458	0.914043	GCCCTCCCCGCTAGCACCGTGAACAATAATCAGCCGTCCCATAGCATTGAATCCAAGCTGTTCAATGAGCCTATGCGGAACATGTGCATCAAAGTGCTGCGCTATTACGAGAAGTTTTCCCACGATTCTAGTGAGTCAGTCATGGACAGCAACCCAAAC
A_tiles_P07248:583	HSIESKLFNEPMRNMCIKVLRYYEKFSHDSSESVMDSNPNLLSKELLMPAVSE	ADR1	P07248	583	0.0148497	1.00331	0.010239	0.0180155	0.0103999	0.0174775	1.0934	0.867716	1.0645	0.0103869	0.927007	-0.309271	0.0126469	0.00853071	0.994663	0.863953	CACTCCATCGAGTCTAAACTGTTCAACGAGCCAATGCGCAACATGTGCATTAAGGTCTTGCGGTATTACGAGAAGTTTAGCCATGACAGTAGCGAATCCGTGATGGATTCCAATCCTAACCTCCTGTCAAAGGAACTGCTCATGCCCGCCGTGAGCGAG
A_tiles_P07248:596	NMCIKVLRYYEKFSHDSSESVMDSNPNLLSKELLMPAVSELNEYLDLFKNNFL	ADR1	P07248	596	0.0174805	1.18106	0.515798	0.019695	0.0150081	0.018071	1.19533	1.2522	1.10065	0.0104475	0.93242	-0.285515	0.0120913	0.00902718	0.950968	0.914234	AACATGTGCATCAAGGTGCTGCGCTACTATGAGAAGTTTTCTCACGACAGTTCCGAGAGCGTGATGGATTCCAATCCTAATTTGCTGAGCAAAGAACTGCTGATGCCCGCCGTCTCAGAACTGAACGAGTACCTCGACCTCTTCAAGAACAACTTCCTC
A_tiles_P07248:609	SHDSSESVMDSNPNLLSKELLMPAVSELNEYLDLFKNNFLPHFPIIHPSLLDL	ADR1	P07248	609	0.0248122	1.67642	1.60141	0.0320887	0.0201801	0.0235896	1.94753	1.68373	1.43678	0.0194874	1.73921	2.25824	0.022923	0.0165667	1.80287	1.6778	AGCCACGACAGCAGTGAGAGCGTCATGGACTCCAATCCCAATCTCCTCTCTAAAGAACTGTTGATGCCTGCCGTGTCAGAGTTGAACGAGTACCTGGATCTGTTTAAGAACAACTTCCTGCCCCATTTCCCAATTATCCACCCGTCCCTGCTGGACCTC
A_tiles_P07248:622	NLLSKELLMPAVSELNEYLDLFKNNFLPHFPIIHPSLLDLDLDSLQRYTNEDG	ADR1	P07248	622	0.0282569	1.90915	2.00435	0.0379706	0.0227397	0.02613	2.30451	1.89729	1.59151	0.0240057	2.14246	3.10911	0.0272804	0.0211241	2.14557	2.13936	AACCTGCTCTCTAAAGAGCTGTTGATGCCGGCCGTGTCCGAACTCAATGAGTATCTGGACCTGTTCAAGAACAACTTCCTCCCTCACTTTCCCATTATCCATCCAAGTCTGTTGGATCTGGATCTCGACAGCCTGCAGCGCTACACCAATGAGGACGGC
A_tiles_P07248:635	ELNEYLDLFKNNFLPHFPIIHPSLLDLDLDSLQRYTNEDGYDDAENAQLFDRL	ADR1	P07248	635	0.0589716	3.98437	4.28475	0.0784063	0.0502909	0.05201	4.75864	4.19604	3.16779	0.0437618	3.90566	5.55928	0.0492855	0.0388572	3.87624	3.93529	GAGCTGAACGAGTACCTGGACCTCTTCAAGAACAATTTCCTGCCCCACTTTCCTATCATTCATCCATCCCTGCTCGATCTCGATTTGGATAGCCTGCAGAGATACACCAATGAAGACGGCTATGACGACGCTGAGAACGCCCAGCTGTTCGACCGCTTG
A_tiles_P07248:648	LPHFPIIHPSLLDLDLDSLQRYTNEDGYDDAENAQLFDRLSQGTDKEYDYEHY	ADR1	P07248	648	0.094145	6.36083	5.73466	0.101567	0.0769541	0.10676	6.1643	6.42068	6.50245	0.0219346	1.95762	2.74095	0.0233689	0.0205884	1.83793	2.0851	CTCCCACACTTCCCCATCATTCATCCTAGCCTGCTGGACCTGGACCTCGATTCCCTGCAAAGATATACCAACGAAGACGGATATGACGATGCTGAGAATGCCCAGCTGTTTGATCGCTTGTCTCAGGGCACAGACAAGGAGTACGACTACGAGCACTAC
A_tiles_P07248:65	GKIITTNNNMNSKINKQLDKLPENLRLNGRTPSGKLRSFVCEVCTRAFARQEH	ADR1	P07248	65	0.0252005	1.70265	1.64954	0.0313498	0.023988	0.0212813	1.90268	2.00144	1.29619	0.0137303	1.2254	0.829421	0.0133979	0.0140709	1.05373	1.42504	GGAAAGATTATCACTACCAATAACAACATGAACTCTAAGATCAACAAGCAGCTGGACAAACTGCCCGAGAATTTGAGACTCAATGGGAGGACACCTAGCGGCAAACTGCGGTCCTTTGTGTGTGAAGTCTGCACGCGCGCCTTCGCTCGCCAGGAGCAC
A_tiles_P07248:661	LDLDSLQRYTNEDGYDDAENAQLFDRLSQGTDKEYDYEHYQILSISKIVCLPL	ADR1	P07248	661	0.0309184	2.08898	2.28336	0.0381515	0.0254344	0.0304592	2.31549	2.12212	1.85518	0.012258	1.094	0.366587	0.0139234	0.0107918	1.09506	1.09294	CTGGACCTGGACAGTCTGCAGCGCTACACAAACGAGGACGGATATGACGATGCTGAAAATGCCCAACTGTTCGATAGACTCTCTCAGGGCACCGATAAAGAGTATGACTACGAGCACTACCAGATTCTGAGCATCTCCAAGATCGTGTGCCTCCCCTTG
A_tiles_P07248:674	GYDDAENAQLFDRLSQGTDKEYDYEHYQILSISKIVCLPLFMATFGSLHKFGY	ADR1	P07248	674	0.0140807	0.951349	-0.154588	0.0137649	0.0142254	0.0142571	0.835423	1.1869	0.868359	0.0144394	1.28869	1.0349	0.0154454	0.0134989	1.21476	1.36711	GGCTATGACGACGCCGAAAACGCTCAGCTGTTCGATCGCTTGAGTCAAGGAACAGATAAGGAGTACGACTATGAGCACTACCAGATCCTGTCCATCTCTAAAATTGTGTGCCTCCCACTGTTTATGGCAACCTTCGGGAGCCTCCATAAGTTCGGCTAC
A_tiles_P07248:687	LSQGTDKEYDYEHYQILSISKIVCLPLFMATFGSLHKFGYKSQTIELYEMSRR	ADR1	P07248	687	0.0113917	0.769674	-0.811427	0.0128599	0.00980485	0.0117244	0.780495	0.81807	0.7141	0.0148825	1.32824	1.15824	0.0167065	0.0132577	1.31395	1.34268	CTGAGCCAAGGGACCGATAAGGAGTACGACTATGAGCACTACCAGATACTCTCCATTTCTAAAATCGTGTGCCTCCCCTTGTTCATGGCCACTTTTGGCTCACTGCATAAGTTCGGATATAAGAGCCAGACAATCGAACTGTACGAGATGAGTCGCCGG
A_tiles_P07248:700	YQILSISKIVCLPLFMATFGSLHKFGYKSQTIELYEMSRRILHSFLETKRRCR	ADR1	P07248	700	0.0136717	0.92372	-0.245939	0.0154827	0.011791	0.0139982	0.939679	0.983782	0.852593	0.0153188	1.36717	1.27613	0.0167349	0.0140225	1.31618	1.42014	TACCAGATCCTGAGTATCTCCAAGATAGTGTGTCTGCCCTTGTTCATGGCCACTTTTGGGTCTCTGCACAAGTTCGGCTACAAATCACAGACCATTGAGCTCTATGAAATGTCCCGGAGAATCCTGCATAGCTTCCTCGAGACAAAGAGGCGCTGCCGC
A_tiles_P07248:713	LFMATFGSLHKFGYKSQTIELYEMSRRILHSFLETKRRCRSTTVNDSYQNIWL	ADR1	P07248	713	0.0100249	0.677325	-1.2076	0.00971189	0.0104511	0.00992602	0.589435	0.871989	0.604566	0.017619	1.57246	1.84697	0.0202134	0.0153576	1.58976	1.55535	CTGTTCATGGCCACCTTCGGGTCTCTCCACAAGTTCGGCTATAAATCCCAGACTATCGAGCTGTACGAGATGAGCCGGAGAATTCTGCATAGCTTTTTGGAAACAAAGCGCAGGTGCCGCAGTACCACGGTGAATGACTCCTACCAGAACATCTGGCTC
A_tiles_P07248:726	YKSQTIELYEMSRRILHSFLETKRRCRSTTVNDSYQNIWLMQSLILSFMFALV	ADR1	P07248	726	0.0121109	0.818266	-0.621668	0.0113798	0.00985388	0.0158413	0.690664	0.822161	0.964852	0.0152344	1.35964	1.2536	0.016099	0.0144163	1.26617	1.46002	TACAAGTCCCAGACAATCGAGTTGTATGAGATGTCACGCCGCATACTCCACTCCTTTCTGGAAACGAAAAGGCGGTGCAGATCTACCACTGTGAATGACAGTTACCAAAACATCTGGCTGATGCAGAGCCTCATTCTGAGCTTCATGTTCGCCCTGGTC
A_tiles_P07248:739	RILHSFLETKRRCRSTTVNDSYQNIWLMQSLILSFMFALVADYLEKIDSSLMK	ADR1	P07248	739	0.00994712	0.67207	-1.23174	0.0088713	0.00904903	0.0122604	0.538417	0.755008	0.746744	0.0133791	1.19406	0.723692	0.0139289	0.012851	1.09549	1.30149	CGCATACTGCACAGTTTTCTGGAGACTAAACGGAGGTGCAGAAGCACAACCGTGAATGACTCTTATCAGAACATCTGGCTGATGCAGAGCCTCATTCTGTCCTTCATGTTCGCTTTGGTCGCCGATTACCTCGAAAAGATCGACTCCTCACTGATGAAG
A_tiles_P07248:752	RSTTVNDSYQNIWLMQSLILSFMFALVADYLEKIDSSLMKRQLSALCSTIRSN	ADR1	P07248	752	0.0111109	0.750702	-0.888783	0.0118021	0.00818234	0.0142041	0.716296	0.682696	0.865135	0.0147337	1.31496	1.11724	0.0148051	0.0146627	1.1644	1.48498	CGGTCCACCACAGTGAATGACTCTTACCAGAACATCTGGTTGATGCAAAGCCTGATTCTGAGCTTCATGTTTGCCCTGGTCGCTGACTATCTCGAGAAAATAGATAGTTCCCTCATGAAGAGGCAGCTGTCAGCACTGTGCTCCACTATCCGCAGCAAC
A_tiles_P07248:765	LMQSLILSFMFALVADYLEKIDSSLMKRQLSALCSTIRSNCLPTISANSEKSI	ADR1	P07248	765	0.0117346	0.792837	-0.719521	0.012754	0.0112512	0.0112605	0.774067	0.938747	0.685843	0.0136194	1.21551	0.79634	0.0164162	0.0112992	1.29111	1.14433	CTGATGCAGTCCTTGATCCTGAGCTTCATGTTTGCCCTGGTGGCTGACTACCTGGAAAAGATTGATTCATCCCTCATGAAACGCCAGCTGAGCGCACTCTGTTCTACAATAAGAAGCAATTGCCTCCCCACCATCTCTGCCAACAGTGAGAAGTCCATC
A_tiles_P07248:778	VADYLEKIDSSLMKRQLSALCSTIRSNCLPTISANSEKSINNNNEPLTFGSPL	ADR1	P07248	778	0.0135213	0.913556	-0.280233	0.0169637	0.00986686	0.0147692	1.02956	0.823244	0.899548	0.00974019	0.869292	-0.571569	0.00915371	0.0103642	0.719928	1.04965	GTGGCAGACTACCTGGAAAAGATCGATAGTAGCCTGATGAAAAGACAGCTGTCCGCTCTCTGTTCAACCATACGCAGCAATTGCCTGCCAACTATTTCCGCCAACTCCGAGAAGTCTATCAACAATAACAACGAGCCTCTCACATTCGGCAGCCCCTTG
A_tiles_P07248:78	INKQLDKLPENLRLNGRTPSGKLRSFVCEVCTRAFARQEHLKRHYRSHTNEKP	ADR1	P07248	78	0.0127502	0.861459	-0.462228	0.0144505	0.00928985	0.0154405	0.877034	0.775101	0.940436	0.00868222	0.774871	-1.04075	0.0132669	0.00568186	1.04343	0.575435	ATCAACAAGCAGCTCGACAAGCTCCCTGAGAACCTGAGGTTGAATGGCAGAACACCCTCTGGAAAACTGCGGTCCTTTGTCTGTGAAGTGTGCACTCGCGCCTTCGCTCGCCAGGAGCATCTGAAAAGGCACTACCGGAGCCACACCAACGAGAAGCCA
A_tiles_P07248:791	KRQLSALCSTIRSNCLPTISANSEKSINNNNEPLTFGSPLQYIIFESKIRCTL	ADR1	P07248	791	0.011187	0.755844	-0.867627	0.0118232	0.00926697	0.0127783	0.717573	0.773192	0.778292	0.0107521	0.959601	-0.168267	0.011979	0.00965081	0.942134	0.977392	AAGCGGCAGCTGAGTGCTCTGTGCTCTACTATTCGCTCCAATTGTCTCCCCACGATTTCAGCCAACAGCGAGAAAAGCATCAACAATAACAACGAGCCACTGACATTTGGCTCCCCTCTCCAGTACATCATATTCGAAAGCAAGATCAGGTGCACCTTG
A_tiles_P07248:803	SNCLPTISANSEKSINNNNEPLTFGSPLQYIIFESKIRCTLMAYDFCQFLKCF	ADR1	P07248	803	0.0315891	2.1343	2.34988	0.0337179	0.0285015	0.0328008	2.04641	2.37803	1.99781	0.0134436	1.19982	0.743333	0.0140252	0.0128862	1.10306	1.30506	TCCAATTGCCTGCCCACCATCAGTGCTAACAGCGAGAAGTCTATAAACAACAATAACGAGCCTCTGACATTCGGCTCCCCATTGCAGTACATTATCTTCGAAAGCAAAATCCGCTGCACTCTGATGGCCTATGACTTCTGTCAGTTTCTCAAGTGTTTT
A_tiles_P07248:816	SINNNNEPLTFGSPLQYIIFESKIRCTLMAYDFCQFLKCFFHIKFDLSIKEKD	ADR1	P07248	816	0.0112327	0.758928	-0.855005	0.0118558	0.00943649	0.012668	0.719555	0.787336	0.771573	0.0068571	0.611983	-2.0037	0.00510139	0.00921707	0.401218	0.933465	TCCATCAACAATAACAACGAGCCACTGACCTTTGGCTCTCCCTTGCAGTACATAATCTTCGAGAGTAAAATTCGGTGTACACTGATGGCCTATGACTTCTGCCAGTTTCTGAAGTGCTTTTTCCACATCAAGTTCGACCTCAGCATTAAGGAAAAAGAT
A_tiles_P07248:829	PLQYIIFESKIRCTLMAYDFCQFLKCFFHIKFDLSIKEKDVETIYIPDNESKW	ADR1	P07248	829	0.0179066	1.20985	0.590449	0.0197274	0.0140242	0.0207536	1.1973	1.17012	1.26404	0.0166577	1.48667	1.61805	0.0169693	0.0163519	1.33462	1.65605	CCCCTGCAGTATATCATTTTCGAGTCTAAAATTCGCTGTACACTCATGGCCTACGACTTTTGCCAGTTTCTGAAATGCTTCTTCCACATCAAGTTCGACTTGAGCATCAAGGAGAAGGACGTGGAAACCATATACATCCCTGATAACGAGTCCAAGTGG
A_tiles_P07248:842	TLMAYDFCQFLKCFFHIKFDLSIKEKDVETIYIPDNESKWASESIICNGHVVQ	ADR1	P07248	842	0.0132973	0.89842	-0.332017	0.0110591	0.0136301	0.015598	0.671199	1.13723	0.950033	0.016109	1.43769	1.48136	0.017367	0.0149421	1.3659	1.51327	ACACTGATGGCTTACGATTTTTGCCAGTTCCTGAAGTGCTTCTTTCACATCAAGTTCGACCTCTCCATCAAGGAGAAAGACGTCGAAACCATTTATATTCCCGACAACGAGTCTAAATGGGCCAGTGAGAGCATCATATGTAATGGCCATGTGGTGCAG
A_tiles_P07248:855	FFHIKFDLSIKEKDVETIYIPDNESKWASESIICNGHVVQKQNFYDFRNFYYS	ADR1	P07248	855	0.0209318	1.41424	1.07428	0.023394	0.0140197	0.0279623	1.41983	1.16974	1.70311	0.0109315	0.975613	-0.100741	0.0135475	0.00882063	1.06549	0.893316	TTCTTTCACATCAAGTTCGACCTGAGTATCAAGGAGAAGGACGTCGAGACCATATATATTCCCGATAACGAGAGCAAATGGGCCTCAGAATCCATTATCTGCAATGGCCATGTGGTGCAGAAACAGAACTTTTACGACTTCCGCAACTTCTACTACTCT
A_tiles_P07248:868	DVETIYIPDNESKWASESIICNGHVVQKQNFYDFRNFYYSFTYGHLHSIPEFL	ADR1	P07248	868	0.0198786	1.34308	0.914263	0.0225323	0.0177709	0.0196174	1.36753	1.48272	1.19484	0.0188556	1.68283	2.12376	0.0235775	0.0150794	1.85434	1.52718	GATGTGGAGACCATCTATATCCCTGACAACGAGTCAAAATGGGCCTCTGAATCCATCATTTGCAATGGCCATGTCGTGCAGAAGCAGAACTTTTACGACTTCCGCAACTTTTACTACAGCTTCACATATGGGCACCTGCACAGTATACCCGAGTTCCTC
A_tiles_P07248:881	WASESIICNGHVVQKQNFYDFRNFYYSFTYGHLHSIPEFLGSSMIYYEYDLRK	ADR1	P07248	881	0.0177057	1.19627	0.555476	0.0205783	0.0141364	0.0190807	1.24894	1.17947	1.16215	0.0158034	1.41042	1.40322	0.0171255	0.0145834	1.3469	1.47695	TGGGCCAGTGAGAGCATAATTTGCAATGGGCACGTCGTGCAGAAACAGAACTTCTACGATTTCCGGAACTTTTACTACTCTTTCACCTACGGACACCTGCATTCAATCCCCGAATTTCTGGGCAGCTCCATGATCTATTATGAGTACGACCTCCGCAAG
A_tiles_P07248:894	QKQNFYDFRNFYYSFTYGHLHSIPEFLGSSMIYYEYDLRKGTKSHVFLDRIDT	ADR1	P07248	894	0.0294436	1.98934	2.13187	0.0299318	0.0251136	0.0339571	1.81662	2.09536	2.06823	0.0153789	1.37254	1.29212	0.0172059	0.013746	1.35322	1.39214	CAGAAGCAGAACTTCTACGACTTCCGGAATTTCTACTACTCTTTTACATACGGGCACTTGCACTCCATTCCCGAATTCCTGGGATCAAGTATGATCTACTATGAGTATGACCTGCGCAAAGGCACCAAGAGCCATGTGTTTCTCGATAGGATCGACACT
A_tiles_P07248:907	SFTYGHLHSIPEFLGSSMIYYEYDLRKGTKSHVFLDRIDTKRLERSLDTSSYG	ADR1	P07248	907	0.0181626	1.22714	0.634441	0.0222276	0.0138551	0.019455	1.34904	1.15601	1.18495	0.0137754	1.22943	0.842816	0.0148513	0.0127776	1.16803	1.29406	TCCTTCACTTACGGCCACCTGCACTCTATCCCCGAGTTTTTGGGGAGCTCCATGATCTATTACGAGTATGACCTCCGCAAGGGAACGAAAAGCCATGTGTTCCTGGATAGAATTGACACAAAGAGGCTGGAACGGTCACTCGACACCAGTTCCTACGGC
A_tiles_P07248:91	LNGRTPSGKLRSFVCEVCTRAFARQEHLKRHYRSHTNEKPYPCGLCNRCFTRR	ADR1	P07248	91	0.0190124	1.28456	0.77617	0.0231019	0.0166392	0.0178785	1.4021	1.3883	1.08893	0.015114	1.3489	1.22122	0.0163784	0.0139473	1.28814	1.41252	CTGAATGGCCGCACCCCTAGCGGAAAGCTGAGGTCTTTCGTCTGTGAGGTGTGTACGCGGGCTTTTGCCCGGCAGGAACACTTGAAAAGACACTATCGCTCCCATACAAACGAGAAGCCATACCCCTGCGGGCTCTGCAACAGATGCTTCACTAGGCGC
A_tiles_P07248:920	LGSSMIYYEYDLRKGTKSHVFLDRIDTKRLERSLDTSSYGNDNMAATNKNIAI	ADR1	P07248	920	0.0151665	1.02471	0.0756669	0.0158927	0.0124428	0.0176418	0.964559	1.03817	1.07451	0.0121308	1.08265	0.324049	0.0142231	0.0103464	1.11863	1.04784	TTGGGAAGCTCTATGATCTACTACGAGTACGACCTGAGGAAGGGCACTAAAAGCCACGTGTTCCTGGATCGGATAGATACAAAAAGACTCGAACGCTCACTGGACACCAGTTCCTATGGGAATGACAACATGGCAGCTACCAACAAGAACATCGCCATT
A_tiles_P07248:933	KGTKSHVFLDRIDTKRLERSLDTSSYGNDNMAATNKNIAILIDDTIILKNNLM	ADR1	P07248	933	0.0177401	1.19859	0.561479	0.0210826	0.0145215	0.018236	1.27955	1.21161	1.1107	0.00897815	0.801282	-0.903989	0.0106412	0.00757502	0.836916	0.767165	AAAGGGACAAAGAGTCACGTGTTCTTGGACCGGATTGACACTAAACGCCTGGAGAGGTCTCTCGATACCTCCAGCTACGGCAATGATAATATGGCAGCTACCAACAAGAACATCGCCATCCTGATAGACGACACGATCATTCTCAAGAACAACCTGATG
A_tiles_P07248:946	TKRLERSLDTSSYGNDNMAATNKNIAILIDDTIILKNNLMSMRFIKQIDRSFT	ADR1	P07248	946	0.0199948	1.35093	0.932323	0.0212569	0.016782	0.0224082	1.29012	1.40021	1.36482	0.0102147	0.911641	-0.377478	0.00979172	0.0106559	0.770106	1.07919	ACCAAAAGACTGGAGCGCTCTTTGGATACCAGTTCATACGGCAATGACAATATGGCAGCCACTAACAAGAACATAGCTATCCTGATCGATGACACGATCATCCTCAAGAACAACCTGATGAGCATGAGGTTCATTAAGCAGATTGACCGGTCCTTTACA
A_tiles_P07248:959	GNDNMAATNKNIAILIDDTIILKNNLMSMRFIKQIDRSFTEKVRKGQIAKIYD	ADR1	P07248	959	0.0213043	1.43941	1.12895	0.0261337	0.0171048	0.0216312	1.58611	1.42715	1.3175	0.0111542	0.995492	-0.0184381	0.0117266	0.0106098	0.92228	1.07452	GGCAATGACAATATGGCTGCCACTAACAAGAACATCGCCATTCTCATCGACGATACCATCATCCTGAAGAACAACCTGATGAGCATGCGGTTCATTAAGCAGATAGATCGCTCCTTTACAGAGAAGGTGAGGAAAGGGCAGATTGCAAAAATCTACGAC
A_tiles_P07248:972	ILIDDTIILKNNLMSMRFIKQIDRSFTEKVRKGQIAKIYDSFLNSVRLNFLKN	ADR1	P07248	972	0.0121617	0.821694	-0.608711	0.0130055	0.0125129	0.0110534	0.78933	1.04401	0.673233	0.0157094	1.40203	1.37887	0.0161383	0.0152919	1.26926	1.5487	ATCCTCATCGACGACACCATCATCTTGAAGAACAACCTGATGAGCATGAGATTCATCAAGCAGATTGACCGGTCTTTTACAGAGAAAGTGAGGAAGGGCCAGATAGCCAAAATTTACGATAGTTTCCTGAATTCCGTCCGCCTCAACTTCCTGAAGAAT
A_tiles_P07248:985	MSMRFIKQIDRSFTEKVRKGQIAKIYDSFLNSVRLNFLKNYSVEVLCEFLVAL	ADR1	P07248	985	0.00984908	0.665445	-1.26244	0.0101935	0.00887737	0.010558	0.618664	0.740685	0.643055	0.0149562	1.33481	1.17838	0.0126603	0.0176684	0.995715	1.78938	ATGAGCATGAGATTCATCAAGCAGATTGACCGGAGTTTTACCGAAAAGGTCAGGAAAGGCCAGATAGCCAAGATCTACGATTCTTTCCTGAATTCCGTGCGCTTGAACTTCCTGAAAAACTATTCAGTGGAGGTTCTCTGCGAGTTTCTGGTGGCTCTC
A_tiles_P07248:998	TEKVRKGQIAKIYDSFLNSVRLNFLKNYSVEVLCEFLVALNFSIRNISSLYVE	ADR1	P07248	998	0.00896163	0.605486	-1.55512	0.00948317	0.00581652	0.013048	0.575553	0.485303	0.794718	0.0116745	1.04192	0.167573	0.013404	0.0101681	1.05421	1.02978	ACCGAGAAGGTCAGGAAGGGCCAGATTGCCAAAATCTACGACAGCTTTCTCAATTCCGTCCGGCTGAATTTCCTCAAGAACTATAGCGTGGAAGTGCTGTGCGAGTTCTTGGTTGCTCTGAACTTCAGTATACGCAACATCTCTTCCCTGTACGTGGAG
A_tiles_P07249:0	MTSNSDGSSTSPVEKPITGDVETNEPTKPIRRLSTPSPEQDQEGDFDEEDDDD	ARG80	P07249	0	0.00988448	0.667837	-1.25132	0.0120905	0.00693237	0.0115222	0.7338	0.578405	0.701783	0.0134839	1.20341	0.755522	0.0130968	0.0138823	1.03005	1.40594	ATGACGTCAAACAGCGACGGCTCTAGTACCAGCCCCGTGGAGAAGCCGATTACTGGGGATGTCGAAACCAATGAACCAACAAAACCCATCCGCAGACTGTCCACCCCTTCCCCTGAACAGGACCAGGAGGGAGATTTCGACGAGGAGGACGATGACGAC
A_tiles_P07249:112	SVLTGANILLLILANSGLVYTFTTPKLEPVVREDEGKSLIRACINASDTPDAT	ARG80	P07249	112	0.0112199	0.758063	-0.858539	0.0153123	0.00683041	0.0135045	0.929334	0.569897	0.822522	0.0154182	1.37604	1.30251	0.0176772	0.0134479	1.39029	1.36194	TCCGTGCTGACCGGCGCCAACATTCTGCTGCTCATCCTGGCTAATAGCGGACTGGTTTACACATTCACCACTCCTAAACTCGAGCCCGTGGTCAGAGAGGATGAAGGGAAGTCTTTGATACGCGCATGCATCAACGCCAGTGACACCCCAGACGCGACG
A_tiles_P07249:12	VEKPITGDVETNEPTKPIRRLSTPSPEQDQEGDFDEEDDDDKFSVSTSTPTPT	ARG80	P07249	12	0.0116275	0.785602	-0.747934	0.00975412	0.008759	0.0183999	0.591998	0.73081	1.12069	0.014113	1.42931	1.45748		0.014113		1.42931	GTGGAGAAGCCCATCACGGGCGACGTGGAGACTAACGAGCCGACCAAACCAATTCGCAGACTGTCCACACCTTCACCTGAACAGGATCAGGAAGGAGACTTTGATGAGGAAGACGATGACGACAAGTTCAGTGTCTCTACAAGCACTCCCACCCCCACC
A_tiles_P07249:124	LANSGLVYTFTTPKLEPVVREDEGKSLIRACINASDTPDATDTSPAQEQSPAN	ARG80	P07249	124																	CTGGCGAATTCTGGCCTGGTGTACACTTTCACCACACCCAAGCTCGAGCCAGTGGTCAGAGAAGATGAGGGAAAATCCTTGATTAGGGCATGCATCAACGCCTCAGATACCCCTGACGCTACCGACACGAGTCCGGCCCAGGAGCAGAGCCCCGCCAAC
A_tiles_P07249:25	PTKPIRRLSTPSPEQDQEGDFDEEDDDDKFSVSTSTPTPTITKTKDSSDTSTV	ARG80	P07249	25	0.0103545	0.699595	-1.10732	0.0119954	0.0102047	0.00906941	0.728023	0.851429	0.552392	0.0108132	0.96506	-0.145119	0.011948	0.00978626	0.939695	0.99111	CCCACGAAGCCCATTCGCAGGCTGTCTACACCTTCACCTGAGCAGGACCAGGAAGGCGATTTTGACGAGGAGGACGATGACGATAAATTCAGCGTGTCCACTAGTACACCGACCCCAACGATCACTAAGACCAAGGACTCCAGCGACACCTCCACCGTC
A_tiles_P07249:37	PEQDQEGDFDEEDDDDKFSVSTSTPTPTITKTKDSSDTSTVTRRKQPIRYIEN	ARG80	P07249	37	0.0108989	0.736378	-0.948499	0.0133011	0.00945574	0.0102937	0.80727	0.788942	0.626958	0.018075	1.61316	1.95124	0.017922	0.0182293	1.40954	1.84619	CCCGAGCAGGACCAGGAGGGCGACTTCGATGAAGAAGACGACGATGACAAATTTTCAGTCTCCACCAGCACACCAACACCTACGATTACCAAGACTAAAGACTCTAGTGATACCAGCACTGTGACCAGACGGAAGCAACCGATCCGCTACATCGAGAAC
A_tiles_P07249:50	DDDKFSVSTSTPTPTITKTKDSSDTSTVTRRKQPIRYIENKTRRHVTFSKRRH	ARG80	P07249	50	0.0193059	1.30439	0.82366	0.0199999	0.0145043	0.0248056	1.21383	1.21017	1.51084	0.0151219	1.3496	1.22334	0.0175321	0.0130429	1.37888	1.32093	GACGACGATAAGTTTTCCGTGTCTACGAGCACGCCAACCCCTACCATCACCAAGACTAAAGACTCAAGTGATACTTCCACCGTCACAAGGCGGAAACAGCCCATTAGGTACATCGAGAACAAGACACGCAGACATGTGACCTTCAGCAAGCGCCGGCAC
A_tiles_P07249:62	TPTITKTKDSSDTSTVTRRKQPIRYIENKTRRHVTFSKRRHGIMKKAYELSVL	ARG80	P07249	62	0.019299	1.30392	0.822544	0.0222407	0.0139088	0.0232362	1.34983	1.16049	1.41525	0.018447	1.64635	2.03435	0.0215479	0.0157922	1.69472	1.59937	ACACCCACCATAACCAAGACCAAGGACAGTTCAGATACGAGCACTGTCACAAGACGGAAACAGCCTATTCGCTATATCGAAAACAAAACTCGCAGGCACGTGACCTTCTCCAAACGGAGGCATGGCATCATGAAGAAGGCCTACGAGCTGTCTGTGCTC
A_tiles_P07249:74	TSTVTRRKQPIRYIENKTRRHVTFSKRRHGIMKKAYELSVLTGANILLLILAN	ARG80	P07249	74	0.0163818	1.10682	0.314588	0.0257171	0.0118766	0.0143937	1.56082	0.990928	0.876678	0.0290302	2.59089	3.88458	0.0305593	0.0275777	2.40345	2.79295	ACGTCCACAGTGACCCGCCGGAAGCAGCCCATACGCTATATCGAAAACAAGACTAGGAGGCACGTGACCTTCAGCAAAAGACGGCATGGCATTATGAAAAAGGCTTACGAGCTGTCTGTCCTCACCGGGGCAAATATCCTCCTGCTGATCTTGGCCAAC
A_tiles_P07249:87	IENKTRRHVTFSKRRHGIMKKAYELSVLTGANILLLILANSGLVYTFTTPKLE	ARG80	P07249	87	0.0152939	1.03332	0.101601	0.0118232	0.0156766	0.0193006	0.717573	1.30798	1.17555	0.0194577	1.73656	2.25201	0.0185737	0.0203837	1.4608	2.06437	ATAGAAAACAAGACCCGCAGGCACGTGACCTTTTCTAAGCGGAGACATGGCATCATGAAAAAAGCCTATGAGCTCTCCGTCTTGACAGGAGCAAATATCCTGCTCCTGATTCTGGCTAACAGCGGGCTGGTGTACACTTTCACCACGCCCAAGCTGGAG
A_tiles_P07249:99	KRRHGIMKKAYELSVLTGANILLLILANSGLVYTFTTPKLEPVVREDEGKSLI	ARG80	P07249	99	0.0103274	0.697762	-1.11546	0.0112958	0.0080188	0.0121603	0.685569	0.669051	0.740649	0.0158181	1.41173	1.40701	0.0156495	0.0159885	1.23081	1.61925	AAGAGGCGCCACGGCATCATGAAGAAAGCCTACGAGCTGTCTGTTCTCACAGGAGCTAATATCCTGCTCTTGATACTGGCAAACAGCGGTCTCGTCTATACCTTCACGACTCCTAAACTGGAACCCGTGGTGCGGGAGGACGAGGGGAAGTCCCTGATT
A_tiles_P07261:0	MVCTSTSSNFYSIAQYILQSYFKVNVDSLNSLKLVDLIVDQTYPDSLTLRKLN	GCR1	P07261	0	0.0177295	1.19788	0.559634	0.0200171	0.014281	0.0194953	1.21488	1.19154	1.1874	0.0170099	1.5181	1.70342	0.0178095	0.0162462	1.4007	1.64535	ATGGTGTGCACCAGTACGTCATCCAACTTCTACAGCATCGCCCAATACATCCTGCAGTCTTACTTTAAGGTGAATGTGGACTCCCTGAACAGCCTGAAACTGGTCGATTTGATTGTTGACCAGACTTATCCCGACAGCCTCACACTCCGCAAGCTGAAC
A_tiles_P07261:103	VPLLDSNFISLNSNPLLYIQNQNPNSNSSVKVSRSQTFEPSKELIDLVFPWLS	GCR1	P07261	103	0.0385601	2.60528	2.96794	0.0506261	0.0299925	0.0377595	3.07261	2.50243	2.29982	0.0152691	1.36274	1.26288	0.0170731	0.0136557	1.34278	1.38299	GTTCCGCTGCTGGATTCCAACTTTATCAGCCTGAACTCCAATCCACTCCTCTACATCCAGAATCAGAACCCTAATTCCAACTCTAGCGTGAAGGTGTCAAGATCTCAAACCTTCGAACCCAGTAAAGAGCTGATTGACTTGGTCTTCCCCTGGCTGAGC
A_tiles_P07261:116	NPLLYIQNQNPNSNSSVKVSRSQTFEPSKELIDLVFPWLSYLKQDMLLIDRTN	GCR1	P07261	116																	AACCCTCTGCTGTATATCCAGAACCAGAACCCCAATTCCAATAGCAGCGTGAAAGTGTCAAGGAGTCAAACATTCGAGCCATCTAAGGAACTCATTGACCTGGTCTTTCCGTGGTTGTCCTACCTGAAGCAGGATATGCTCCTGATCGACCGCACCAAC
A_tiles_P07261:128	SNSSVKVSRSQTFEPSKELIDLVFPWLSYLKQDMLLIDRTNYKLYSLCELFEF	GCR1	P07261	128	0.0195655	1.32193	0.865057	0.0221838	0.0157388	0.0214518	1.34638	1.31317	1.30657	0.0181335	1.61838	1.96443	0.0200914	0.0163665	1.58016	1.65752	TCAAATTCCAGCGTGAAGGTCTCCCGCAGTCAGACCTTTGAGCCTAGCAAAGAACTGATTGATCTGGTGTTTCCCTGGCTCTCTTATCTGAAGCAGGACATGCTCTTGATCGACAGAACAAACTACAAGCTCTACTCCCTGTGCGAGCTGTTCGAGTTC
A_tiles_P07261:13	AQYILQSYFKVNVDSLNSLKLVDLIVDQTYPDSLTLRKLNEGATGQPYDYFNT	GCR1	P07261	13	0.019832	1.33993	0.906993	0.0225511	0.0173204	0.0199699	1.36867	1.44513	1.21631	0.0128647	1.14815	0.563717	0.0139965	0.0118244	1.10081	1.19753	GCCCAGTACATCCTGCAGAGTTACTTTAAGGTCAACGTGGACAGCCTCAACTCCTTGAAACTGGTTGATCTGATTGTGGACCAAACCTATCCCGATTCTCTGACACTGAGAAAGCTCAATGAGGGCGCTACGGGGCAGCCTTATGACTACTTCAACACT
A_tiles_P07261:141	EPSKELIDLVFPWLSYLKQDMLLIDRTNYKLYSLCELFEFMGRVAIQDLRYLS	GCR1	P07261	141	0.011383	0.769082	-0.813809	0.0124197	0.00982428	0.0120881	0.753775	0.819692	0.736252	0.0148198	1.32264	1.14101	0.0150182	0.0146241	1.18116	1.48106	GAGCCCTCCAAGGAGCTGATCGATCTGGTGTTCCCTTGGTTGAGCTACCTCAAACAGGACATGCTCTTGATTGATCGCACCAACTACAAGCTCTATAGTCTGTGCGAGCTGTTTGAATTCATGGGCAGGGTCGCCATCCAGGACCTGCGGTACCTGTCT
A_tiles_P07261:154	LSYLKQDMLLIDRTNYKLYSLCELFEFMGRVAIQDLRYLSQHPLLLPNIVTFI	GCR1	P07261	154	0.0171587	1.15931	0.458195	0.0170072	0.0153619	0.0193362	1.0322	1.28173	1.17772	0.0134131	1.19709	0.734054	0.0127205	0.0141434	1.00045	1.43239	CTGTCCTATCTGAAGCAGGACATGTTGCTGATCGACCGGACAAACTACAAACTGTACTCTCTCTGCGAGCTGTTCGAATTTATGGGCAGGGTCGCCATACAAGATCTGCGCTACTTGAGCCAGCACCCTCTCCTGCTCCCCAATATTGTGACCTTCATC
A_tiles_P07261:167	TNYKLYSLCELFEFMGRVAIQDLRYLSQHPLLLPNIVTFISKFIPELFQNEEF	GCR1	P07261	167	0.0181244	1.22456	0.62791	0.0175574	0.0172114	0.0197021	1.0656	1.43604	1.2	0.0133488	1.19136	0.71445	0.0135985	0.0131037	1.06951	1.32709	ACAAACTACAAGCTGTACAGCCTCTGCGAGCTGTTCGAATTTATGGGCCGCGTCGCCATTCAAGACTTGAGATATCTGTCCCAGCACCCTCTCCTGCTGCCAAATATAGTGACCTTTATCTCTAAATTCATCCCCGAGCTCTTCCAGAACGAGGAATTC
A_tiles_P07261:180	FMGRVAIQDLRYLSQHPLLLPNIVTFISKFIPELFQNEEFKGIGSIKNSNNNA	GCR1	P07261	180	0.0147905	0.999307	-0.00214928	0.0182475	0.0124011	0.0142982	1.10748	1.03469	0.870863	0.0180288	1.60904	1.9408	0.0164011	0.0198181	1.28993	2.00709	TTTATGGGACGCGTCGCCATTCAGGACCTGAGGTACCTCTCTCAACACCCACTGCTCTTGCCTAATATCGTGACCTTCATCAGTAAGTTCATCCCCGAACTGTTTCAGAACGAGGAGTTCAAAGGCATTGGGTCCATAAAGAACAGCAACAATAACGCT
A_tiles_P07261:193	SQHPLLLPNIVTFISKFIPELFQNEEFKGIGSIKNSNNNALNNVTGIETQFLN	GCR1	P07261	193	0.017468	1.18021	0.513576	0.0186861	0.0135916	0.0209866	1.1341	1.13401	1.27824	0.0132673	1.18408	0.689443	0.016553	0.0106338	1.30187	1.07694	TCCCAACACCCACTGCTCCTGCCCAATATTGTGACATTCATCAGCAAATTCATACCTGAGTTGTTTCAGAACGAGGAGTTCAAGGGAATCGGCTCTATCAAGAACAGTAACAACAATGCCCTCAACAACGTCACCGGGATTGAAACTCAGTTTCTGAAT
A_tiles_P07261:205	FISKFIPELFQNEEFKGIGSIKNSNNNALNNVTGIETQFLNPSTEEVSQKVDS	GCR1	P07261	205	0.0147386	0.995805	-0.0130297	0.0142396	0.0118278	0.0190094	0.86423	0.98686	1.15781	0.00955749	0.852987	-0.648833	0.0117816	0.00775323	0.926611	0.785213	TTCATCAGTAAGTTTATCCCTGAACTCTTCCAAAACGAGGAGTTCAAGGGAATCGGGTCCATTAAGAACTCCAACAATAACGCCCTGAACAATGTGACCGGCATAGAAACTCAGTTTCTGAATCCCTCTACAGAGGAGGTCAGCCAGAAAGTGGACAGC
A_tiles_P07261:218	EFKGIGSIKNSNNNALNNVTGIETQFLNPSTEEVSQKVDSYFMELSKKLTTEN	GCR1	P07261	218	0.0166114	1.12234	0.357728	0.0159577	0.0145088	0.0197979	0.968504	1.21054	1.20584	0.00888269	0.792762	-0.947607	0.00953832	0.00827212	0.750177	0.837765	GAGTTCAAGGGCATCGGGAGCATCAAGAATTCCAACAATAACGCCCTCAACAACGTGACAGGAATTGAGACCCAGTTTTTGAATCCCAGTACTGAGGAAGTCAGCCAGAAAGTGGACTCCTACTTCATGGAACTGTCTAAAAAGCTGACGACCGAGAAC
A_tiles_P07261:231	NALNNVTGIETQFLNPSTEEVSQKVDSYFMELSKKLTTENIRLSQEITQLKAD	GCR1	P07261	231	0.0179021	1.20954	0.589656	0.0200471	0.0146629	0.0195181	1.2167	1.2234	1.18879	0.00897589	0.80108	-0.905016	0.00971137	0.00829611	0.763787	0.840194	AACGCTCTCAACAACGTGACCGGCATTGAGACGCAATTTCTCAATCCCTCAACTGAAGAAGTGTCCCAGAAGGTCGACTCTTACTTCATGGAGCTGAGTAAGAAACTGACAACCGAGAATATCCGCCTGAGCCAGGAGATCACCCAGTTGAAGGCCGAT
A_tiles_P07261:244	LNPSTEEVSQKVDSYFMELSKKLTTENIRLSQEITQLKADMNSVGNVCNQILL	GCR1	P07261	244	0.0185313	1.25205	0.696732	0.0232745	0.01596	0.0171319	1.41258	1.33163	1.04346	0.011815	1.05447	0.216414	0.0128671	0.010849	1.01198	1.09874	CTGAATCCCAGTACCGAGGAGGTTAGCCAGAAGGTGGACTCTTACTTCATGGAACTGTCCAAGAAGCTGACTACAGAGAACATCAGGCTCAGCCAGGAAATTACGCAACTCAAAGCCGATATGAATTCCGTCGGCAACGTGTGCAACCAGATCCTGTTG
A_tiles_P07261:257	SYFMELSKKLTTENIRLSQEITQLKADMNSVGNVCNQILLLQRQLLSGNQAIG	GCR1	P07261	257	0.0184466	1.24633	0.682532	0.0239109	0.0141865	0.0185045	1.4512	1.18366	1.12706	0.00962028	0.858591	-0.622114	0.0109813	0.00842794	0.863667	0.853545	TCCTACTTCATGGAACTGAGTAAGAAGCTGACTACCGAGAACATAAGACTCTCACAGGAGATTACACAGCTGAAAGCCGACATGAACTCTGTCGGGAATGTGTGCAATCAAATCTTGCTCCTCCAGCGCCAGCTGCTGAGCGGAAACCAGGCTATCGGC
A_tiles_P07261:26	DSLNSLKLVDLIVDQTYPDSLTLRKLNEGATGQPYDYFNTVSRDADISKCPIF	GCR1	P07261	26	0.0384647	2.59884	2.96027	0.0458877	0.0331465	0.0374156	2.78502	2.76559	2.27888	0.0114978	1.02616	0.105371	0.0135422	0.00976214	1.06507	0.988668	GACTCCCTGAACAGTCTGAAGCTGGTGGACTTGATCGTCGATCAGACCTATCCTGATTCTCTCACGCTGAGAAAGCTCAATGAGGGCGCCACAGGACAGCCCTACGATTACTTTAACACTGTGTCACGGGACGCTGACATTAGCAAATGCCCAATCTTC
A_tiles_P07261:270	NIRLSQEITQLKADMNSVGNVCNQILLLQRQLLSGNQAIGSKSENIVSSTGGG	GCR1	P07261	270	0.0134981	0.911987	-0.285559	0.0177165	0.0119996	0.0115684	1.07525	1.00119	0.704599	0.00995238	0.88823	-0.48363	0.0116297	0.00851697	0.914662	0.862562	AACATCCGCCTCTCTCAGGAGATTACACAGCTGAAAGCTGACATGAACTCAGTGGGGAATGTGTGCAACCAGATACTGCTCTTGCAAAGACAGCTGCTGAGTGGAAATCAGGCCATCGGTAGCAAGTCCGAAAACATCGTCAGCTCCACCGGCGGCGGG
A_tiles_P07261:283	DMNSVGNVCNQILLLQRQLLSGNQAIGSKSENIVSSTGGGILILDKNSINSNV	GCR1	P07261	283	0.0136328	0.921089	-0.254778	0.0146144	0.0115131	0.0150584	0.88698	0.9606	0.917168	0.00958041	0.855033	-0.63906	0.0109952	0.00834767	0.864759	0.845416	GACATGAACTCCGTGGGCAATGTCTGCAATCAGATCCTGCTGCTCCAGAGACAACTGTTGTCAGGGAATCAGGCCATCGGGTCTAAAAGTGAGAACATTGTTAGCTCCACCGGAGGCGGTATTCTGATACTCGATAAGAACAGCATCAACTCCAACGTG
A_tiles_P07261:295	LLLQRQLLSGNQAIGSKSENIVSSTGGGILILDKNSINSNVLSNLVQSIDPNH	GCR1	P07261	295	0.00925513	0.625316	-1.45523	0.0111704	0.00523928	0.0135459	0.677953	0.437141	0.825045	0.00715791	0.63883	-1.82851	0.00702656	0.00729172	0.55263	0.738474	CTGCTCCTGCAGCGCCAACTCTTGAGCGGCAATCAGGCCATCGGAAGCAAAAGTGAGAATATTGTGTCATCCACCGGGGGTGGCATTCTGATCCTCGATAAGAATTCCATAAACTCTAACGTCCTGTCCAACCTGGTGCAGAGCATCGACCCCAACCAC
A_tiles_P07261:308	IGSKSENIVSSTGGGILILDKNSINSNVLSNLVQSIDPNHSKPNGQAQTHQRG	GCR1	P07261	308	0.00840747	0.51117	-2.07996	0.0052022		0.0135876	0.315732		0.827584	0.00803878	0.717445	-1.35494	0.00968954	0.00666926	0.76207	0.675434	ATCGGGTCTAAATCCGAGAACATTGTCAGCAGCACCGGTGGCGGAATACTCATTCTGGACAAGAACTCAATCAATTCCAACGTGCTGTCCAACTTGGTGCAAAGCATCGATCCCAATCATAGTAAGCCTAATGGGCAGGCCCAGACACACCAGCGCGGC
A_tiles_P07261:321	GGILILDKNSINSNVLSNLVQSIDPNHSKPNGQAQTHQRGPKGQSHAQVQSTN	GCR1	P07261	321																	GGAGGCATCTTGATCCTGGACAAGAACAGTATTAACTCCAACGTCCTCAGCAACCTGGTGCAGTCAATAGATCCCAATCACTCTAAACCAAATGGTCAGGCTCAGACACATCAAAGAGGCCCTAAGGGGCAATCCCACGCCCAGGTGCAGAGCACCAAC
A_tiles_P07261:334	NVLSNLVQSIDPNHSKPNGQAQTHQRGPKGQSHAQVQSTNSPALAPINMFPSL	GCR1	P07261	334	0.00910779	0.615361	-1.50497	0.00901714	0.00840864	0.00996426	0.547269	0.701577	0.606895	0.0112669	1.00555	0.0225768	0.013347	0.00951095	1.04973	0.963227	AACGTGCTGAGCAACCTGGTGCAGTCTATCGACCCTAACCACAGCAAACCAAATGGGCAGGCCCAGACACATCAAAGAGGACCTAAGGGCCAGTCCCACGCTCAAGTCCAGAGTACCAATTCACCCGCACTCGCCCCGATTAACATGTTCCCCTCCTTG
A_tiles_P07261:347	HSKPNGQAQTHQRGPKGQSHAQVQSTNSPALAPINMFPSLSNSIQPMLGTLAP	GCR1	P07261	347	0.0137123	0.926463	-0.236748	0.0131812	0.00946919	0.0206569	0.799997	0.790064	1.25815	0.00816715	0.728901	-1.2903	0.006612	0.0100881	0.520025	1.02168	CACTCAAAGCCCAACGGGCAGGCCCAGACCCACCAGAGAGGTCCAAAAGGACAGAGTCATGCGCAAGTGCAAAGCACTAATTCTCCCGCTCTCGCACCCATTAACATGTTCCCTAGCCTGTCCAACTCCATCCAGCCGATGTTGGGCACACTGGCCCCT
A_tiles_P07261:360	GPKGQSHAQVQSTNSPALAPINMFPSLSNSIQPMLGTLAPQPQDIVQKRKLPL	GCR1	P07261	360	0.0100604	0.679726	-1.19663	0.00908366	0.00888524	0.012616	0.551306	0.741342	0.768405	0.0084282	0.7522	-1.16191	0.00782108	0.00908245	0.615118	0.919831	GGCCCCAAGGGACAGTCCCACGCTCAGGTCCAGTCAACAAACAGCCCTGCACTGGCCCCTATTAACATGTTCCCATCCCTCTCTAATAGTATCCAACCCATGCTCGGGACCCTGGCCCCGCAACCACAGGACATCGTGCAGAAACGCAAGCTGCCCTTG
A_tiles_P07261:372	TNSPALAPINMFPSLSNSIQPMLGTLAPQPQDIVQKRKLPLPGSIASAATGSP	GCR1	P07261	372	0.00962894	0.650572	-1.33251	0.00960321	0.00720677	0.0128996	0.582839	0.601299	0.785681	0.00874501	0.780475	-1.01135	0.0158908	0.00481254	1.24979	0.487393	ACCAACTCCCCTGCCCTCGCTCCCATAAACATGTTCCCCTCTCTCAGCAATTCCATTCAGCCCATGCTGGGAACACTGGCACCACAGCCACAGGACATCGTGCAAAAAAGAAAGTTGCCTCTGCCCGGGTCAATCGCGAGCGCCGCCACTGGCAGTCCG
A_tiles_P07261:385	SLSNSIQPMLGTLAPQPQDIVQKRKLPLPGSIASAATGSPFSPSPVGESPYSK	GCR1	P07261	385	0.0119218	0.805484	-0.670468	0.0115126	0.0108635	0.013548	0.698726	0.906403	0.825169	0.00791752	0.706623	-1.41696	0.00960001	0.0065299	0.755029	0.66132	TCCCTGTCCAACAGTATCCAGCCCATGCTGGGCACCCTGGCTCCTCAGCCACAAGACATTGTCCAGAAGAGAAAACTCCCATTGCCTGGTAGCATCGCCTCAGCAGCCACAGGGTCTCCCTTCTCTCCGAGCCCCGTGGGAGAGAGCCCCTACTCCAAG
A_tiles_P07261:39	DQTYPDSLTLRKLNEGATGQPYDYFNTVSRDADISKCPIFALTIFFVIRWSHP	GCR1	P07261	39	0.0128493	0.868155	-0.43823	0.010995	0.0123768	0.0155897	0.667308	1.03267	0.949523	0.0150316	1.34154	1.19891	0.0158908	0.0142189	1.24979	1.44002	GACCAGACCTACCCCGACAGTTTGACTCTGCGCAAACTCAACGAGGGAGCAACAGGCCAGCCGTATGATTACTTCAATACGGTCTCTAGGGATGCCGACATAAGCAAGTGCCCAATTTTTGCTCTGACCATCTTCTTCGTGATCCGGTGGTCCCACCCT
A_tiles_P07261:398	APQPQDIVQKRKLPLPGSIASAATGSPFSPSPVGESPYSKRFKLDDKPTPSQT	GCR1	P07261	398	0.00889421	0.600931	-1.57852	0.0079655	0.00819327	0.0107808	0.483443	0.683608	0.65663	0.00695421	0.620649	-1.94632	0.008961	0.00539684	0.704771	0.546568	GCCCCGCAGCCCCAGGACATCGTCCAAAAGCGCAAACTGCCTCTGCCAGGGAGCATTGCTTCCGCAGCCACTGGATCCCCATTTTCACCCAGCCCTGTGGGCGAGAGTCCCTACTCTAAAAGATTCAAGCTCGACGATAAGCCCACCCCGTCCCAGACA
A_tiles_P07261:411	PLPGSIASAATGSPFSPSPVGESPYSKRFKLDDKPTPSQTALDSLLTKSISSP	GCR1	P07261	411	0.0102136	0.690071	-1.14981	0.0079478	0.00936726	0.014311	0.482369	0.78156	0.871645	0.00704693	0.628925	-1.89227	0.00756707	0.00656255	0.59514	0.664627	CCCCTGCCCGGGTCCATTGCCTCTGCTGCAACGGGCAGTCCCTTTAGCCCATCTCCCGTGGGAGAGTCACCTTACTCCAAAAGATTCAAACTCGATGACAAGCCAACACCGAGTCAGACTGCCCTGGACAGCCTGTTGACCAAGAGCATCTCCAGCCCT
A_tiles_P07261:424	PFSPSPVGESPYSKRFKLDDKPTPSQTALDSLLTKSISSPRLPLSTLANTAVT	GCR1	P07261	424										0.00945883	0.743925	-1.20705	0.00945883		0.743925		CCCTTCTCCCCATCTCCCGTGGGCGAGAGCCCTTACAGCAAGAGATTTAAGTTGGATGACAAGCCTACACCCAGCCAGACCGCTCTGGACAGTCTGCTGACTAAATCAATCTCCTCTCCGCGCCTGCCACTCTCCACGCTCGCAAACACCGCCGTCACC
A_tiles_P07261:437	KRFKLDDKPTPSQTALDSLLTKSISSPRLPLSTLANTAVTESFRSPQQFQHSP	GCR1	P07261	437	0.0102756	0.694264	-1.13103	0.0118685	0.00816119	0.0112015	0.720325	0.680931	0.682249	0.00957642	0.854677	-0.640759	0.00987526	0.00928663	0.776677	0.94051	AAGCGCTTCAAGCTGGACGACAAGCCTACCCCTAGCCAAACTGCTCTCGATTCCCTGTTGACCAAAAGTATCAGCTCCCCAAGGCTGCCCCTCTCCACACTGGCAAACACCGCCGTGACGGAGTCTTTTCGGTCACCGCAGCAGTTCCAGCACAGCCCC
A_tiles_P07261:449	QTALDSLLTKSISSPRLPLSTLANTAVTESFRSPQQFQHSPDFVVGGSSSSTT	GCR1	P07261	449	0.0120888	0.816771	-0.627339	0.0115036	0.0096844	0.0158578	0.698179	0.80802	0.965854	0.00933993	0.83357	-0.742792	0.010914	0.00799285	0.858375	0.809481	CAGACGGCCCTGGACTCCCTGTTGACTAAGTCCATCAGCTCTCCAAGACTCCCTCTCTCTACCCTGGCAAACACAGCTGTGACCGAGTCCTTTAGGTCACCGCAACAGTTCCAGCACAGTCCCGATTTCGTCGTGGGCGGGAGCAGTAGCTCCACAACC
A_tiles_P07261:462	SPRLPLSTLANTAVTESFRSPQQFQHSPDFVVGGSSSSTTENNSKKVNEDSPS	GCR1	P07261	462	0.00814483	0.550299	-1.85134	0.00978569	0.00669681	0.00824492	0.593914	0.55875	0.502175	0.0103258	0.921557	-0.333333	0.0126118	0.00845417	0.9919	0.856202	TCCCCGCGCCTGCCCCTGTCAACGCTCGCCAATACCGCTGTTACAGAAAGCTTCAGATCTCCACAGCAGTTTCAACACAGTCCTGACTTCGTCGTGGGAGGCTCCTCCAGTTCCACTACCGAGAACAACAGCAAAAAGGTGAACGAGGATTCTCCCAGC
A_tiles_P07261:475	VTESFRSPQQFQHSPDFVVGGSSSSTTENNSKKVNEDSPSSSSKLAERPRLPN	GCR1	P07261	475	0.0116078	0.784273	-0.753185	0.0135989	0.00774322	0.0148534	0.825346	0.646058	0.904678	0.00683256	0.609792	-2.01833	0.00722311	0.00646312	0.568088	0.654557	GTGACCGAGTCCTTCCGCTCTCCTCAGCAGTTCCAACACAGTCCAGATTTTGTGGTTGGAGGCAGCAGCTCCAGTACTACAGAAAACAACAGCAAGAAAGTCAATGAGGACTCTCCGTCCAGCTCATCCAAGCTGGCCGAGCGGCCCAGGCTCCCCAAC
A_tiles_P07261:488	SPDFVVGGSSSSTTENNSKKVNEDSPSSSSKLAERPRLPNNDSTTSMPESPTE	GCR1	P07261	488	0.00697761	0.471437	-2.33077	0.0064085	0.00552198	0.00959995	0.388945	0.460728	0.584706	0.00570906	0.509522	-2.75136	0.007535	0.0043256	0.592618	0.438078	AGCCCGGACTTCGTGGTGGGCGGGTCTAGCTCCAGCACCACTGAGAACAACTCCAAGAAGGTCAACGAAGATAGCCCCTCATCTTCAAGTAAACTCGCCGAAAGACCTCGCCTGCCTAATAATGACTCCACAACGTCCATGCCAGAGAGTCCCACCGAG
A_tiles_P07261:501	TENNSKKVNEDSPSSSSKLAERPRLPNNDSTTSMPESPTEVAGDDVDREKPPE	GCR1	P07261	501	0.00851419	0.575255	-1.71387	0.00989091	0.00630705	0.0098939	0.6003	0.52623	0.60261	0.00765677	0.683351	-1.55361	0.00935756	0.00626511	0.73596	0.634503	ACCGAGAACAACTCCAAGAAGGTGAACGAGGATAGCCCCTCTAGCAGCTCCAAACTGGCTGAACGCCCTAGACTCCCCAATAATGATAGTACAACTTCAATGCCGGAATCCCCTACGGAAGTCGCCGGAGACGACGTGGACAGGGAGAAGCCACCCGAG
A_tiles_P07261:51	LNEGATGQPYDYFNTVSRDADISKCPIFALTIFFVIRWSHPNPPISIENFTTV	GCR1	P07261	51	0.0100468	0.678803	-1.20084	0.00948899	0.0112777	0.00947635	0.575906	0.940956	0.577178	0.0166091	1.48233	1.60611	0.0171821	0.0160552	1.35135	1.626	CTCAACGAGGGCGCCACGGGACAGCCGTACGACTATTTCAATACAGTCAGCAGGGATGCTGACATCTCAAAGTGCCCCATCTTTGCACTGACCATTTTCTTTGTGATACGGTGGTCTCACCCAAACCCTCCCATTTCCATCGAAAACTTCACTACCGTG
A_tiles_P07261:514	SSSSKLAERPRLPNNDSTTSMPESPTEVAGDDVDREKPPESSKSEPNDNSPES	GCR1	P07261	514	0.00968436	0.654316	-1.31472	0.00888865	0.00771926	0.0132373	0.53947	0.644059	0.806249	0.00786228	0.701693	-1.44553	0.00867237	0.00712787	0.682071	0.721879	AGCAGCTCCTCCAAGCTCGCCGAGAGGCCCCGGCTGCCCAACAATGACTCTACAACTTCCATGCCTGAGTCCCCAACCGAAGTCGCTGGCGATGATGTGGACCGCGAAAAACCGCCTGAAAGTTCAAAGAGTGAGCCAAACGACAACAGCCCCGAGTCT
A_tiles_P07261:527	NNDSTTSMPESPTEVAGDDVDREKPPESSKSEPNDNSPESKDPEKNGKNSNPL	GCR1	P07261	527	0.00871629	0.58891	-1.64116	0.0087537	0.00631659	0.0119763	0.53128	0.527026	0.729441	0.00821967	0.73359	-1.26414	0.00923886	0.00731292	0.726625	0.740621	AACAATGACTCCACCACTTCCATGCCTGAGAGCCCCACAGAAGTCGCCGGAGATGATGTGGACAGAGAAAAACCACCAGAATCTTCAAAGAGTGAGCCCAACGACAATAGCCCTGAGTCCAAAGACCCGGAGAAGAACGGCAAGAACAGCAATCCCCTG
A_tiles_P07261:539	TEVAGDDVDREKPPESSKSEPNDNSPESKDPEKNGKNSNPLGTDADKPVPISN	GCR1	P07261	539	0.00756329	0.511008	-2.08094	0.00576193	0.0049893	0.0150496	0.349703	0.416284	0.916628	0.00681135	0.607899	-2.03102	0.00801219	0.00579049	0.630149	0.586435	ACCGAGGTGGCCGGCGACGACGTCGACAGAGAGAAGCCACCTGAAAGTTCAAAGTCCGAACCTAATGATAACAGCCCCGAGTCTAAGGATCCCGAGAAAAACGGAAAAAATTCCAACCCACTGGGGACAGATGCTGACAAGCCGGTGCCCATCAGCAAC
A_tiles_P07261:552	PESSKSEPNDNSPESKDPEKNGKNSNPLGTDADKPVPISNIHNSTEAANSSGT	GCR1	P07261	552	0.00995013	0.672273	-1.2308	0.010185	0.00771689	0.0125338	0.61815	0.643861	0.763396	0.00911118	0.813155	-0.843971	0.00919363	0.00902947	0.723068	0.914466	CCCGAGTCCTCCAAGTCTGAGCCCAACGACAACTCACCCGAAAGCAAAGACCCTGAAAAGAACGGGAAGAATAGCAATCCTCTGGGAACCGATGCTGATAAACCAGTGCCGATCTCTAATATTCACAACAGCACAGAGGCAGCCAACAGTTCCGGCACT
A_tiles_P07261:565	ESKDPEKNGKNSNPLGTDADKPVPISNIHNSTEAANSSGTVTKTAPSFPQSSS	GCR1	P07261	565	0.0080329	0.542737	-1.89423	0.00767034	0.00706001	0.00957188	0.465529	0.589054	0.582997	0.00758078	0.676569	-1.59431	0.00797402	0.00720694	0.627146	0.729887	GAGTCCAAGGACCCCGAGAAGAACGGGAAGAACAGTAACCCACTGGGAACAGATGCTGACAAACCTGTGCCCATTTCCAACATCCACAATAGCACGGAAGCCGCAAATAGCTCCGGCACTGTCACCAAAACCGCCCCTAGCTTCCCGCAGTCTTCATCT
A_tiles_P07261:578	PLGTDADKPVPISNIHNSTEAANSSGTVTKTAPSFPQSSSKFEIINKKDTKAG	GCR1	P07261	578	0.00828393	0.559697	-1.79885	0.00832351	0.00683202	0.00999661	0.505171	0.570031	0.608865	0.00852269	0.760633	-1.11642	0.00931862	0.00779475	0.732898	0.789418	CCACTGGGAACCGACGCCGATAAACCTGTGCCCATCAGCAACATACACAACTCCACGGAAGCTGCAAATTCCTCAGGGACAGTCACCAAAACCGCGCCCAGTTTTCCGCAGAGCTCTTCCAAGTTCGAGATTATCAACAAGAAGGACACTAAGGCCGGC
A_tiles_P07261:591	NIHNSTEAANSSGTVTKTAPSFPQSSSKFEIINKKDTKAGPNEAIKYKLSREN	GCR1	P07261	591	0.00989904	0.668821	-1.24676	0.00973039	0.00809169	0.01232	0.590557	0.675132	0.750376	0.00843771	0.753049	-1.15731	0.00890008	0.00799936	0.69998	0.810141	AACATACACAACTCCACGGAAGCGGCCAATTCCTCAGGCACCGTGACAAAAACTGCTCCTTCTTTTCCACAGAGCTCCAGCAAGTTCGAGATCATCAACAAGAAAGACACCAAAGCAGGACCCAATGAGGCCATTAAGTACAAGCTGAGTCGCGAGAAC
A_tiles_P07261:604	TVTKTAPSFPQSSSKFEIINKKDTKAGPNEAIKYKLSRENKTIWDLYAEWYIG	GCR1	P07261	604	0.0484543	3.27378	3.67589	0.0636439	0.0326133	0.0548082	3.86268	2.7211	3.33822	0.0143921	1.28446	1.0215	0.0169897	0.0121916	1.33622	1.23471	ACAGTGACTAAGACCGCTCCATCATTTCCCCAGAGCAGTTCTAAGTTCGAGATAATCAACAAGAAGGACACGAAAGCCGGCCCTAATGAAGCCATTAAGTACAAACTCTCCAGAGAGAACAAAACCATCTGGGATCTGTACGCAGAGTGGTATATCGGG
A_tiles_P07261:616	SSKFEIINKKDTKAGPNEAIKYKLSRENKTIWDLYAEWYIGLNGKSSIKKLIE	GCR1	P07261	616	0.0249734	1.68731	1.62148	0.0317207	0.0199392	0.0246253	1.9252	1.66363	1.49986	0.017516	1.56327	1.82306	0.0184577	0.0166225	1.45167	1.68345	TCATCTAAGTTCGAAATCATCAACAAGAAGGACACCAAAGCTGGACCCAACGAGGCAATTAAGTACAAACTGAGCCGCGAGAATAAAACAATCTGGGATCTGTATGCCGAATGGTACATTGGCCTCAACGGGAAATCCAGTATAAAGAAGTTGATCGAG
A_tiles_P07261:629	AGPNEAIKYKLSRENKTIWDLYAEWYIGLNGKSSIKKLIENYGWRRWKVSEDS	GCR1	P07261	629	0.0173669	1.17338	0.495586	0.0205461	0.0156207	0.0163206	1.24699	1.30332	0.994044	0.0196125	1.75038	2.28435	0.0199794	0.0192524	1.57135	1.9498	GCAGGGCCCAATGAGGCCATCAAGTACAAGCTCAGTCGGGAGAACAAAACCATTTGGGATTTGTACGCTGAATGGTATATCGGCCTGAACGGCAAGTCATCCATAAAGAAACTGATCGAAAACTACGGATGGCGCAGGTGGAAAGTGAGCGAGGACTCT
A_tiles_P07261:64	NTVSRDADISKCPIFALTIFFVIRWSHPNPPISIENFTTVPLLDSNFISLNSN	GCR1	P07261	64	0.0106207	0.71758	-1.02865	0.010441	0.00999266	0.0114825	0.633688	0.83374	0.699367	0.0138461	1.23573	0.863687	0.0143504	0.0133595	1.12864	1.35299	AACACAGTGTCCCGCGATGCCGACATCAGTAAGTGCCCGATATTTGCTTTGACGATCTTCTTCGTCATTAGGTGGAGCCACCCCAATCCTCCCATTTCTATCGAGAATTTTACCACTGTGCCACTGCTCGACTCCAACTTCATCAGCCTGAACTCAAAC
A_tiles_P07261:642	ENKTIWDLYAEWYIGLNGKSSIKKLIENYGWRRWKVSEDSHFFPTRRIIMDYI	GCR1	P07261	642	0.0147645	0.997552	-0.00759767	0.0178075	0.0117236	0.0154167	1.08078	0.97816	0.93899	0.0221582	1.97758	2.78233	0.0214474	0.0228926	1.68681	2.31847	GAGAACAAGACCATCTGGGACCTGTATGCCGAGTGGTACATTGGACTCAACGGGAAATCTAGCATCAAGAAGCTGATAGAGAATTACGGCTGGCGGAGATGGAAAGTGTCCGAAGATAGTCACTTTTTCCCCACACGCAGGATTATCATGGACTACATC
A_tiles_P07261:655	IGLNGKSSIKKLIENYGWRRWKVSEDSHFFPTRRIIMDYIETECDRGIKLGRF	GCR1	P07261	655	0.0141934	0.958964	-0.129876	0.0167098	0.0130165	0.0131459	1.01416	1.08603	0.800681	0.0135457	1.20892	0.774181	0.0139726	0.0131318	1.09893	1.32993	ATCGGGCTGAACGGCAAGAGTTCTATTAAGAAGCTGATTGAGAATTACGGATGGCGGCGGTGGAAAGTGTCCGAAGATAGCCACTTTTTCCCCACACGCAGAATAATCATGGACTATATCGAGACCGAGTGCGACCGCGGTATCAAACTCGGCAGGTTC
A_tiles_P07261:668	ENYGWRRWKVSEDSHFFPTRRIIMDYIETECDRGIKLGRFTNPQQPREDIRKI	GCR1	P07261	668	0.0229311	1.54932	1.35704	0.0260738	0.0203107	0.0227691	1.58247	1.69463	1.3868	0.012945	1.15532	0.589115	0.0147278	0.011378	1.15833	1.15232	GAGAATTACGGATGGCGCAGATGGAAGGTGTCCGAAGATAGCCACTTCTTCCCTACTCGGCGGATTATCATGGACTATATCGAGACAGAATGCGATCGCGGCATAAAACTGGGGAGATTTACCAACCCACAGCAGCCCAGGGAGGACATTAGGAAGATC
A_tiles_P07261:681	SHFFPTRRIIMDYIETECDRGIKLGRFTNPQQPREDIRKILVGDLEKFRINNG	GCR1	P07261	681	0.00912919	0.616807	-1.4977	0.0144179	0.00624227	0.00845384	0.87505	0.520826	0.5149	0.0121036	1.08022	0.314877	0.0153782	0.00952629	1.20948	0.964781	TCCCACTTCTTCCCCACTAGGCGGATAATCATGGACTACATTGAGACCGAGTGCGACCGGGGCATTAAACTCGGTAGATTTACAAACCCTCAGCAGCCACGCGAAGATATCCGCAAGATCCTGGTGGGGGACCTGGAGAAGTTCAGGATCAATAACGGA
A_tiles_P07261:693	YIETECDRGIKLGRFTNPQQPREDIRKILVGDLEKFRINNGLTLNSLSLYFRN	GCR1	P07261	693	0.0204509	1.38175	1.00224	0.0280511	0.0158251	0.0192682	1.70248	1.32037	1.17357	0.0140491	1.25385	0.923074	0.0161627	0.0122119	1.27117	1.23677	TACATTGAGACCGAGTGCGACCGGGGAATCAAGTTGGGCCGGTTCACAAATCCCCAGCAGCCTAGAGAAGACATACGCAAAATCCTGGTGGGTGATCTGGAGAAGTTTCGCATCAATAACGGGCTGACTCTCAACTCCCTCAGCCTGTATTTCAGGAAC
A_tiles_P07261:706	RFTNPQQPREDIRKILVGDLEKFRINNGLTLNSLSLYFRNLTKNNKEICIFEN	GCR1	P07261	706	0.0192775	1.30247	0.819089	0.025246	0.0189349	0.0149863	1.53223	1.57984	0.912776	0.0125392	1.1191	0.459134	0.0149969	0.0104842	1.17949	1.0618	CGCTTTACCAATCCCCAGCAGCCTCGGGAAGATATCCGCAAAATTCTCGTGGGCGACTTGGAGAAGTTCAGAATAAACAACGGACTGACACTCAATTCCCTGAGCCTGTACTTCAGGAATCTGACTAAGAACAACAAGGAGATCTGCATCTTCGAGAAC
A_tiles_P07261:719	KILVGDLEKFRINNGLTLNSLSLYFRNLTKNNKEICIFENFKNWNVRSMTEEE	GCR1	P07261	719	0.0148896	1.006	0.0185549	0.013422	0.0137931	0.0178307	0.814612	1.15083	1.08602	0.0127242	1.13561	0.518891	0.0140007	0.011564	1.10114	1.17115	AAAATTCTGGTCGGCGACCTGGAAAAATTTCGGATCAATAATGGGCTCACACTGAATTCTTTGTCCCTGTACTTCCGCAACCTCACCAAGAACAACAAGGAGATATGCATCTTCGAGAACTTCAAGAACTGGAACGTGAGGAGCATGACTGAGGAAGAG
A_tiles_P07261:732	NGLTLNSLSLYFRNLTKNNKEICIFENFKNWNVRSMTEEEKLKYCKRRHNTPS	GCR1	P07261	732	0.0105552	0.713152	-1.04783	0.00932293	0.00941828	0.0133928	0.565828	0.785817	0.815719	0.00957563	0.854606	-0.641096	0.0125385	0.00731292	0.986134	0.740621	AATGGCCTCACGCTGAATAGTTTGTCTCTGTACTTCCGGAACCTCACAAAGAACAACAAGGAGATCTGCATTTTCGAGAACTTTAAGAACTGGAATGTGCGCAGCATGACCGAAGAGGAAAAACTGAAGTATTGTAAAAGGAGACACAACACTCCCTCC
A_tiles_P07261:77	IFALTIFFVIRWSHPNPPISIENFTTVPLLDSNFISLNSNPLLYIQNQNPNSN	GCR1	P07261	77	0.0130149	0.879344	-0.398538	0.0109006	0.0117715	0.0171809	0.661578	0.982157	1.04644	0.0138575	1.23675	0.86705	0.0145182	0.0132268	1.14184	1.33956	ATCTTCGCCTTGACCATCTTTTTTGTCATCCGCTGGTCACACCCGAACCCACCTATTAGCATTGAGAATTTCACAACTGTGCCTCTGCTGGACTCCAACTTCATATCCCTCAATTCTAATCCCCTGCTCTACATCCAGAACCAGAACCCCAACAGTAAC
A_tiles_P07261:90	HPNPPISIENFTTVPLLDSNFISLNSNPLLYIQNQNPNSNSSVKVSRSQTFEP	GCR1	P07261	90	0.0171034	1.15558	0.44819	0.0181515	0.0121933	0.0226053	1.10166	1.01735	1.37683	0.0105446	0.941087	-0.247762	0.0114966	0.0096715	0.904192	0.979488	CACCCGAATCCTCCCATCTCTATTGAGAACTTTACAACCGTCCCATTGCTCGACTCCAACTTCATAAGCCTGAACTCAAACCCACTGCTGTACATCCAGAACCAAAATCCCAATTCCAACAGTAGCGTGAAGGTGTCCAGGAGCCAGACTTTCGAACCC
A_tiles_P07269:0	MMEEFSYDHDFNTHFATDLDYLQHDQQQQQQQQHDQQHNQQQQPQPQPIQTQN	PHO2	P07269	0	0.0531917	3.59386	3.96502	0.0520893	0.0509599	0.0566965	3.16141	4.25185	3.45322	0.0121726	1.08638	0.33806	0.0141537	0.0104688	1.11317	1.06023	ATGATGGAGGAATTCTCCTACGACCACGACTTCAACACCCACTTTGCCACAGATCTGGACTATCTCCAGCACGATCAGCAACAACAACAGCAGCAGCAACATGACCAGCAGCATAATCAACAGCAACAGCCACAGCCTCAGCCCATCCAGACTCAGAAC
A_tiles_P07269:104	VERKKISDLIGMPEKNVRIWFQNRRAKLRKKQHGSNKDTIPSSQSRDIANDYD	PHO2	P07269	104	0.0188271	1.27204	0.745822	0.0233221	0.0119189	0.0240077	1.41547	0.994456	1.46224	0.0144123	1.28627	1.02722	0.0155725	0.0133385	1.22476	1.35087	GTGGAACGCAAGAAGATCTCAGATCTGATAGGGATGCCTGAGAAGAACGTCCGGATTTGGTTCCAGAACAGGAGAGCCAAACTCCGGAAAAAACAACACGGCAGCAATAAGGATACCATCCCCAGTTCCCAGTCTCGCGACATCGCTAACGACTACGAC
A_tiles_P07269:117	EKNVRIWFQNRRAKLRKKQHGSNKDTIPSSQSRDIANDYDRGSTDNNLVTTTS	PHO2	P07269	117	0.0126083	0.851873	-0.496913	0.0096337	0.00912396	0.0228033	0.584689	0.76126	1.38889	0.0145715	1.30048	1.07207	0.0159185	0.0133385	1.25197	1.35087	GAGAAGAACGTCCGGATCTGGTTCCAGAACCGGCGCGCTAAGCTCAGAAAAAAACAGCACGGAAGCAATAAGGACACTATCCCCAGCAGTCAATCACGCGATATTGCCAATGATTACGACAGGGGCTCTACAGACAACAACCTGGTGACCACCACGTCC
A_tiles_P07269:13	HFATDLDYLQHDQQQQQQQQHDQQHNQQQQPQPQPIQTQNLEHDHDQHTNDMS	PHO2	P07269	13	0.0128042	0.865105	-0.449137	0.0122565	0.00963031	0.0177848	0.743872	0.803508	1.08323	0.00943471	0.842029	-0.701592	0.011648	0.00764198	0.9161	0.773947	CACTTCGCCACCGACCTGGATTACCTGCAGCATGACCAACAGCAACAACAACAGCAGCAGCATGATCAGCAGCACAACCAGCAGCAACAGCCCCAGCCTCAGCCAATCCAGACACAGAATCTCGAGCACGATCACGACCAGCACACTAACGACATGTCC
A_tiles_P07269:130	KLRKKQHGSNKDTIPSSQSRDIANDYDRGSTDNNLVTTTSTSSIFHDEDLTFF	PHO2	P07269	130	0.0824504	5.5707	5.32354	0.0829527	0.0740021	0.091307	5.03457	6.17438	5.56126	0.0125081	1.11632	0.449014	0.0148292	0.0105503	1.1663	1.06849	AAGCTGCGCAAGAAGCAGCATGGCAGCAACAAAGACACCATCCCCAGCTCCCAGTCTAGGGATATTGCCAACGATTACGATAGAGGGAGTACCGACAACAATCTCGTGACTACAACCTCCACGTCATCCATCTTTCACGACGAGGACCTGACATTCTTC
A_tiles_P07269:143	IPSSQSRDIANDYDRGSTDNNLVTTTSTSSIFHDEDLTFFDRIPLNSNNNYYF	PHO2	P07269	143	0.073242	4.94854	4.95646	0.0695855	0.0632367	0.0892878	4.22329	5.27617	5.43827	0.0120677	1.07702	0.302762	0.0134668	0.010814	1.05915	1.09519	ATCCCCTCTTCCCAGTCCCGCGACATTGCCAATGACTATGATCGGGGCAGCACAGATAACAATCTCGTGACGACCACCTCCACTTCAAGTATATTTCACGACGAGGATCTGACCTTCTTCGACAGGATCCCTCTGAACAGCAATAACAACTACTACTTC
A_tiles_P07269:156	DRGSTDNNLVTTTSTSSIFHDEDLTFFDRIPLNSNNNYYFFDICSITVGSWNR	PHO2	P07269	156	0.0371103	2.50733	2.84916	0.0516395	0.0253592	0.039027	3.13411	2.11585	2.37702	0.0124862	1.11437	0.441875	0.0136495	0.0114222	1.07351	1.15679	GACCGCGGGTCCACTGACAATAATCTCGTGACGACCACCTCTACAAGCAGCATATTTCACGATGAGGATCTGACCTTTTTCGACAGGATTCCCCTGAACTCAAACAACAACTACTATTTCTTCGACATCTGCTCCATCACAGTCGGCAGTTGGAATCGG
A_tiles_P07269:169	STSSIFHDEDLTFFDRIPLNSNNNYYFFDICSITVGSWNRMKSGALQRRNFQS	PHO2	P07269	169	0.0156083	1.05456	0.164657	0.0191423	0.0142192	0.01397	1.16179	1.18638	0.850871	0.0138124	1.23273	0.853744	0.0149914	0.0127261	1.17905	1.28885	TCCACTAGTAGCATCTTTCACGATGAGGACCTGACATTTTTCGACAGGATACCCCTGAACAGCAATAACAACTACTATTTCTTCGACATCTGCTCCATTACCGTGGGGTCATGGAATCGCATGAAGTCCGGCGCCCTCCAGAGACGGAACTTCCAGTCT
A_tiles_P07269:182	FDRIPLNSNNNYYFFDICSITVGSWNRMKSGALQRRNFQSIKELRNLSPIKIN	PHO2	P07269	182	0.0144989	0.97961	-0.0638535	0.0188315	0.0108001	0.0149863	1.14292	0.901111	0.912776	0.0106469	0.95021	-0.208396	0.0124366	0.00911466	0.978124	0.923093	TTCGATCGCATCCCTCTGAACTCTAATAACAACTATTACTTCTTCGACATATGCAGCATCACCGTGGGCTCCTGGAATAGAATGAAAAGTGGGGCCCTGCAGAGGCGCAATTTTCAGTCCATTAAGGAGCTCCGGAACTTGAGCCCCATTAAGATCAAC
A_tiles_P07269:195	FFDICSITVGSWNRMKSGALQRRNFQSIKELRNLSPIKINNIMSNATDLMVLI	PHO2	P07269	195	0.0160042	1.08131	0.242312	0.0162569	0.0106267	0.0237284	0.986663	0.886644	1.44523	0.0184045	1.64256	2.02495	0.0163953	0.0206599	1.28947	2.09234	TTCTTCGATATCTGCTCCATAACAGTCGGCTCCTGGAACAGGATGAAATCTGGAGCTTTGCAGAGACGCAATTTTCAGAGTATCAAGGAGCTCCGGAATCTGAGCCCCATTAAGATCAACAACATTATGAGCAACGCCACCGACCTGATGGTGCTGATC
A_tiles_P07269:208	RMKSGALQRRNFQSIKELRNLSPIKINNIMSNATDLMVLISKKNSEINYFFSA	PHO2	P07269	208	0.0191855	1.29625	0.804266	0.0178926	0.0160522	0.0245875	1.08594	1.33932	1.49755	0.0122209	1.09069	0.354226	0.0132256	0.0112925	1.04018	1.14365	CGCATGAAATCCGGCGCCCTGCAGAGAAGGAATTTTCAGTCTATAAAAGAGCTGCGGAACTTGAGCCCCATCAAGATCAACAACATTATGAGCAATGCAACCGACCTCATGGTGCTGATCTCCAAGAAGAACAGTGAAATTAACTACTTCTTCTCAGCT
A_tiles_P07269:221	SIKELRNLSPIKINNIMSNATDLMVLISKKNSEINYFFSAMANNTKILFRIFF	PHO2	P07269	221	0.0174506	1.17903	0.510478	0.0203211	0.0123173	0.0212307	1.23333	1.0277	1.2931	0.0127987	1.14226	0.542726	0.0141882	0.0115452	1.11589	1.16925	AGTATTAAAGAACTGCGCAATTTGAGCCCCATTAAGATCAACAACATAATGTCCAATGCTACCGACCTGATGGTGCTGATCTCTAAGAAGAATTCCGAGATCAACTACTTCTTCAGCGCCATGGCAAACAACACAAAAATCCTCTTCCGGATCTTTTTT
A_tiles_P07269:234	NNIMSNATDLMVLISKKNSEINYFFSAMANNTKILFRIFFPLSSVTNCSLTLE	PHO2	P07269	234	0.0166513	1.12504	0.365172	0.016872	0.0150915	0.0181321	1.024	1.25917	1.10438	0.0170052	1.51768	1.70228	0.0181294	0.0159506	1.42586	1.61541	AACAATATCATGTCAAATGCTACTGACCTCATGGTGTTGATCAGCAAGAAGAACTCCGAGATTAACTACTTCTTCTCCGCCATGGCAAACAACACAAAAATCCTCTTCCGCATATTTTTTCCTCTGTCTAGCGTCACGAATTGCAGTCTGACCCTGGAA
A_tiles_P07269:247	ISKKNSEINYFFSAMANNTKILFRIFFPLSSVTNCSLTLETDDDIINSNNTSD	PHO2	P07269	247	0.0305312	2.06281	2.24429	0.0374286	0.0241891	0.0314345	2.27162	2.01822	1.91459	0.0136608	1.2192	0.808722	0.0150023	0.0124393	1.17991	1.25979	ATTTCTAAAAAGAACTCCGAGATTAACTACTTCTTCTCCGCTATGGCCAACAATACGAAGATCCTCTTCCGCATATTTTTTCCCCTGAGTAGCGTGACAAATTGCAGCCTGACTTTGGAAACCGATGACGACATCATCAACTCAAACAATACCTCCGAC
A_tiles_P07269:259	SAMANNTKILFRIFFPLSSVTNCSLTLETDDDIINSNNTSDKNNSNTNNDDDN	PHO2	P07269	259	0.0207546	1.40227	1.04793	0.0270824	0.0169868	0.0194331	1.64369	1.4173	1.18362	0.0106521	0.95068	-0.206379	0.0130417	0.00870035	1.02572	0.881134	AGCGCTATGGCCAATAACACCAAAATTCTGTTCCGCATATTCTTTCCCCTGTCCAGTGTGACCAATTGCTCTCTCACGTTGGAGACCGATGATGACATCATCAACAGCAACAACACTTCAGACAAGAACAACTCCAACACAAACAATGACGACGATAAT
A_tiles_P07269:26	QQQQQQQHDQQHNQQQQPQPQPIQTQNLEHDHDQHTNDMSASSNASDSGPQRP	PHO2	P07269	26	0.00824044	0.556759	-1.81517	0.00982973	0.00658835	0.00864039	0.596587	0.5497	0.526262	0.0115837	1.03382	0.135735	0.0114502	0.0117188	0.900541	1.18683	CAACAACAGCAACAGCAGCAGCACGACCAGCAGCACAATCAGCAGCAACAACCCCAGCCACAGCCGATCCAGACACAGAATCTGGAGCACGATCATGATCAGCATACCAACGACATGTCTGCCTCAAGTAACGCTTCCGACAGCGGCCCTCAGCGCCCC
A_tiles_P07269:272	FFPLSSVTNCSLTLETDDDIINSNNTSDKNNSNTNNDDDNDDNSNEDNDNSSE	PHO2	P07269	272	0.0118438	0.800216	-0.690806	0.013388	0.00993668	0.0124886	0.812546	0.82907	0.760647	0.0116279	1.03777	0.151272	0.0115377	0.0117188	0.907425	1.18683	TTCTTTCCCCTGAGTAGCGTGACTAATTGCTCCCTCACCCTGGAAACAGATGATGACATCATTAACTCTAACAACACGAGCGACAAGAACAACTCCAATACCAACAACGACGATGACAATGACGACAACAGCAATGAGGACAACGATAATTCCTCAGAG
A_tiles_P07269:285	LETDDDIINSNNTSDKNNSNTNNDDDNDDNSNEDNDNSSEDKRNAKDNFGELK	PHO2	P07269	285	0.0125746	0.849596	-0.505208	0.00996388	0.0132445	0.0150669	0.604729	1.10505	0.917684	0.00998578	0.891211	-0.469961	0.0118998	0.0083796	0.935906	0.84865	CTGGAGACTGATGACGACATTATCAACAGCAATAACACCTCCGACAAGAACAACTCCAACACAAACAATGACGATGATAACGACGACAACAGCAACGAGGATAACGACAATAGTTCTGAGGACAAGAGGAATGCCAAGGATAATTTCGGCGAACTCAAA
A_tiles_P07269:298	SDKNNSNTNNDDDNDDNSNEDNDNSSEDKRNAKDNFGELKLTVTRSPTFAVYF	PHO2	P07269	298	0.0174579	1.17953	0.511782	0.0176535	0.0137706	0.0218873	1.07143	1.14895	1.33309	0.0130149	1.16155	0.611073	0.0150154	0.0112809	1.18094	1.14248	AGTGATAAGAACAACTCCAACACTAACAACGACGATGACAATGACGATAACAGCAACGAGGACAATGACAACAGCTCAGAGGACAAGAGGAATGCTAAGGATAATTTTGGCGAACTCAAACTGACCGTCACGCGCTCTCCCACATTCGCCGTGTACTTC
A_tiles_P07269:311	NDDNSNEDNDNSSEDKRNAKDNFGELKLTVTRSPTFAVYFLNNAPDEDPNLNN	PHO2	P07269	311	0.0207734	1.40354	1.05073	0.0205234	0.0190241	0.0229599	1.24561	1.58728	1.39842	0.00925633	0.826109	-0.779477	0.0113506	0.00754848	0.89271	0.764477	AACGACGACAACTCTAACGAGGACAACGACAATAGCTCCGAGGATAAACGCAACGCTAAGGATAATTTCGGCGAACTGAAGTTGACTGTGACCAGAAGTCCTACATTTGCCGTCTACTTCCTCAATAATGCACCAGATGAGGACCCCAACCTGAACAAC
A_tiles_P07269:324	EDKRNAKDNFGELKLTVTRSPTFAVYFLNNAPDEDPNLNNQWSICDDFSEGRQ	PHO2	P07269	324	0.0468733	3.16695	3.57307	0.0483125	0.0397745	0.0535934	2.93218	3.3186	3.26422	0.0104926	0.936444	-0.267942	0.0120789	0.00911466	0.949989	0.923093	GAGGACAAGCGCAACGCCAAGGACAACTTCGGAGAACTGAAACTCACCGTGACTAGGTCTCCTACATTTGCAGTCTACTTCTTGAACAACGCTCCCGATGAGGATCCAAATCTGAATAATCAGTGGTCCATCTGCGACGACTTCAGCGAGGGCCGGCAG
A_tiles_P07269:337	KLTVTRSPTFAVYFLNNAPDEDPNLNNQWSICDDFSEGRQVNDAFVGGSNIPH	PHO2	P07269	337	0.040546	2.73946	3.1236	0.0384039	0.0376066	0.0461536	2.33081	3.13771	2.81109	0.0132472	1.18229	0.683269	0.0163823	0.0107121	1.28845	1.08487	AAGCTGACAGTTACCCGCAGCCCCACTTTCGCTGTCTACTTCCTCAATAATGCACCTGATGAGGACCCAAACCTGAACAACCAGTGGTCTATTTGCGATGACTTTTCCGAAGGAAGACAGGTGAATGACGCCTTCGTGGGCGGGAGTAACATCCCGCAC
A_tiles_P07269:350	FLNNAPDEDPNLNNQWSICDDFSEGRQVNDAFVGGSNIPHTLKGLQKSLRFMN	PHO2	P07269	350	0.0270764	1.82939	1.87208	0.0358817	0.0192366	0.0287587	2.17773	1.60501	1.75161	0.0107221	0.956927	-0.179654	0.0120932	0.0095065	0.951112	0.962777	TTCTTGAACAACGCCCCAGACGAGGACCCCAACCTGAATAACCAGTGGAGCATTTGCGACGATTTCAGTGAAGGTCGCCAAGTCAATGATGCTTTTGTGGGCGGGTCCAATATCCCTCACACCCTGAAAGGACTGCAGAAGTCTCTCCGGTTCATGAAC
A_tiles_P07269:363	NQWSICDDFSEGRQVNDAFVGGSNIPHTLKGLQKSLRFMNSLILDYKSSNEIL	PHO2	P07269	363	0.0134359	0.907787	-0.299868	0.0162216	0.0126825	0.0117897	0.984523	1.05817	0.718077	0.0112666	1.00552	0.0224616	0.0130403	0.0097341	1.02561	0.985827	AACCAGTGGTCCATCTGCGACGACTTCTCCGAAGGCAGACAGGTGAATGATGCCTTTGTCGGTGGATCAAATATACCCCACACCCTGAAAGGGCTCCAAAAGTCTTTGCGCTTCATGAACAGCCTGATTCTCGACTACAAGAGCAGTAACGAGATCCTG
A_tiles_P07269:376	QVNDAFVGGSNIPHTLKGLQKSLRFMNSLILDYKSSNEILPTINTAIPTAAVP	PHO2	P07269	376	0.0129698	0.876294	-0.409306	0.0171125	0.00950813	0.0134088	1.03859	0.793313	0.816695	0.0126114	1.12555	0.482587	0.0140449	0.0113243	1.10462	1.14687	CAGGTGAACGATGCCTTTGTCGGAGGGAGTAATATACCGCACACACTCAAAGGCTTGCAGAAGTCACTGAGATTCATGAACTCTCTGATCCTCGACTACAAGAGCTCCAATGAGATTCTGCCAACTATCAACACCGCAATCCCCACCGCTGCCGTGCCT
A_tiles_P07269:389	HTLKGLQKSLRFMNSLILDYKSSNEILPTINTAIPTAAVPQQNIAPPFLNTNS	PHO2	P07269	389	0.0158982	1.07415	0.221714	0.0218166	0.0123707	0.014889	1.32409	1.03215	0.906849	0.0111175	0.992212	-0.0319017	0.0113254	0.0109133	0.890731	1.10526	CACACCTTGAAGGGCCTGCAGAAGAGTCTGCGCTTCATGAACAGCCTCATCCTGGACTACAAATCCTCAAATGAGATCCTCCCCACCATTAATACGGCCATACCCACTGCAGCCGTGCCACAACAGAACATCGCTCCTCCGTTTCTGAACACAAACTCT
A_tiles_P07269:39	QQQQPQPQPIQTQNLEHDHDQHTNDMSASSNASDSGPQRPKRTRAKGEALDVL	PHO2	P07269	39	0.0108945	0.736081	-0.949749	0.01011	0.0106219	0.0120413	0.613596	0.886243	0.7334	0.00851349	0.759812	-1.12083	0.00886766	0.00817347	0.69743	0.827774	CAGCAGCAACAGCCGCAGCCCCAGCCTATCCAGACACAGAACCTCGAGCACGATCATGATCAACACACTAACGACATGAGCGCTTCTAGTAATGCATCCGACTCAGGACCACAGAGGCCCAAACGCACCCGGGCCAAGGGCGAAGCCCTGGACGTGCTG
A_tiles_P07269:402	NSLILDYKSSNEILPTINTAIPTAAVPQQNIAPPFLNTNSSATDSNPNTNLED	PHO2	P07269	402	0.0119085	0.804587	-0.673922	0.00822636	0.0102892	0.0199517	0.499275	0.858481	1.2152	0.00791398	0.706307	-1.41879	0.00795798	0.00787022	0.625886	0.797062	AACTCCCTGATCCTGGACTACAAGTCTTCCAACGAGATCCTCCCCACAATAAATACGGCGATTCCTACTGCTGCAGTGCCACAGCAGAATATCGCCCCGCCTTTCTTGAATACCAACTCAAGTGCCACCGATAGCAACCCCAACACCAACCTGGAAGAC
A_tiles_P07269:415	LPTINTAIPTAAVPQQNIAPPFLNTNSSATDSNPNTNLEDSLFFDHDLLSSSI	PHO2	P07269	415	0.0252125	1.70347	1.65102	0.0240475	0.0213819	0.0311697	1.4595	1.78401	1.89846	0.00916151	0.817646	-0.821494	0.0106038	0.00791536	0.833979	0.801633	CTGCCGACCATAAACACGGCGATTCCAACCGCTGCCGTGCCCCAGCAGAATATCGCACCTCCTTTTTTGAACACAAACAGCTCTGCCACTGACTCCAACCCCAATACCAATCTGGAGGATAGTCTGTTCTTCGACCACGACCTCCTCTCATCCAGCATC
A_tiles_P07269:428	PQQNIAPPFLNTNSSATDSNPNTNLEDSLFFDHDLLSSSITNTNNGQGSNNGR	PHO2	P07269	428	0.0274327	1.85347	1.91261	0.0246593	0.0263877	0.0317267	1.49662	2.20167	1.93239	0.00952167	0.84979	-0.664157	0.00958891	0.00945489	0.754156	0.95755	CCCCAGCAGAACATCGCCCCACCGTTCCTGAATACCAATAGCAGCGCTACAGACTCCAATCCTAACACTAACTTGGAGGACTCACTGTTTTTCGACCACGATCTCCTGTCCAGTTCTATTACCAACACGAACAATGGACAAGGGTCCAACAACGGCCGC
A_tiles_P07269:441	SSATDSNPNTNLEDSLFFDHDLLSSSITNTNNGQGSNNGRQASKDDTLNLLDT	PHO2	P07269	441	0.0338381	2.28624	2.56304	0.0333694	0.0314879	0.0368743	2.02526	2.62721	2.24591	0.0102746	0.916986	-0.353621	0.0102326	0.0103168	0.804781	1.04484	AGTAGCGCTACGGACAGCAACCCCAACACCAATCTGGAGGATAGCCTCTTTTTCGACCACGATCTGTTGTCCTCTTCAATCACAAACACCAACAATGGCCAGGGATCCAATAACGGGAGACAGGCCTCCAAGGATGACACTCTCAACCTGCTGGACACC
A_tiles_P07269:454	DSLFFDHDLLSSSITNTNNGQGSNNGRQASKDDTLNLLDTTVNSNNNHNANNE	PHO2	P07269	454	0.0207162	1.39967	1.04219	0.0192574	0.0204497	0.0225759	1.16877	1.70623	1.37503	0.00821437	0.733116	-1.26677	0.00895053	0.00753876	0.703948	0.763493	GACAGCCTGTTCTTTGACCACGACTTGCTGTCCTCTTCCATCACTAACACAAACAATGGGCAGGGCTCAAATAATGGAAGACAGGCCAGTAAGGATGATACCCTCAATCTGCTCGACACGACCGTGAACAGCAATAACAACCATAACGCTAACAACGAG
A_tiles_P07269:467	ITNTNNGQGSNNGRQASKDDTLNLLDTTVNSNNNHNANNEENHLAQEHLSNDA	PHO2	P07269	467																	ATCACCAACACCAACAATGGACAGGGGAGTAATAATGGCAGACAAGCTAGCAAGGATGACACGCTGAACCTGTTGGACACAACTGTGAACTCTAACAACAATCACAACGCCAACAACGAGGAGAATCATCTCGCACAGGAACACCTGTCCAACGACGCC
A_tiles_P07269:480	RQASKDDTLNLLDTTVNSNNNHNANNEENHLAQEHLSNDADIVANPNDHLLSL	PHO2	P07269	480	0.013776	0.930765	-0.222387	0.0119626	0.0143573	0.015222	0.726035	1.19791	0.927128	0.00726989	0.648823	-1.76518	0.00842487	0.00627324	0.662606	0.635327	CGCCAGGCCTCCAAGGACGACACTCTGAACCTCCTGGACACCACAGTCAACTCTAACAACAATCACAACGCCAATAACGAGGAGAATCACCTCGCTCAGGAACATCTGAGTAATGATGCAGATATCGTGGCGAACCCCAACGACCACCTGCTGAGCTTG
A_tiles_P07269:493	TTVNSNNNHNANNEENHLAQEHLSNDADIVANPNDHLLSLPTDSELPNTPDFL	PHO2	P07269	493	0.0225793	1.52555	1.30912	0.022375	0.0204259	0.0251876	1.35799	1.70424	1.53411	0.00992267	0.885578	-0.495832	0.011255	0.00874802	0.885195	0.885962	ACAACGGTGAACTCAAACAACAATCACAACGCCAACAACGAGGAGAACCACCTGGCACAGGAACATCTGTCCAATGATGCTGATATCGTCGCCAATCCTAATGACCACCTCCTCTCTCTGCCGACTGACAGCGAGTTGCCCAACACCCCAGACTTCCTG
A_tiles_P07269:506	EENHLAQEHLSNDADIVANPNDHLLSLPTDSELPNTPDFLKNTNELTDEHRWI	PHO2	P07269	506	0.0158815	1.07302	0.218455	0.0144283	0.0154868	0.0179267	0.875682	1.29215	1.09186	0.0122954	1.09734	0.379032	0.0141549	0.0106802	1.11326	1.08165	GAGGAGAACCACCTGGCCCAGGAGCACCTGTCCAACGACGCTGACATTGTGGCAAATCCGAATGATCATCTGCTCTCTCTCCCTACTGATAGCGAATTGCCCAATACCCCAGACTTCCTGAAGAACACAAACGAACTGACCGACGAGCACCGCTGGATC
A_tiles_P07269:52	NLEHDHDQHTNDMSASSNASDSGPQRPKRTRAKGEALDVLKRKFEINPTPSLV	PHO2	P07269	52	0.0115625	0.781212	-0.765306	0.0110374	0.0116876	0.011983	0.669882	0.97516	0.729848	0.00957648	0.854681	-0.640736	0.0104111	0.00880879	0.818817	0.892117	AACTTGGAGCACGACCACGACCAGCATACTAACGACATGTCCGCCAGCAGTAATGCCTCTGATTCAGGACCTCAGAGACCAAAACGCACCAGGGCTAAAGGCGAAGCACTGGATGTCCTCAAGCGGAAGTTCGAGATCAACCCGACACCCTCCCTGGTG
A_tiles_P07269:65	SASSNASDSGPQRPKRTRAKGEALDVLKRKFEINPTPSLVERKKISDLIGMPE	PHO2	P07269	65	0.0112206	0.758111	-0.858343	0.012113	0.00933864	0.0124886	0.735161	0.779172	0.760647	0.008616	0.768961	-1.07199	0.0096425	0.00769879	0.75837	0.7797	TCCGCCTCATCCAACGCAAGCGACTCTGGCCCTCAGCGCCCCAAGCGGACAAGAGCTAAAGGAGAAGCCCTGGATGTCCTGAAACGCAAGTTCGAGATCAATCCAACCCCGAGTTTGGTGGAGAGGAAGAAGATTAGCGACCTCATCGGGATGCCCGAG
A_tiles_P07269:78	PKRTRAKGEALDVLKRKFEINPTPSLVERKKISDLIGMPEKNVRIWFQNRRAK	PHO2	P07269	78	0.0134965	0.911884	-0.285911	0.0147059	0.0116064	0.0144038	0.892529	0.968387	0.877298	0.0149995	1.33867	1.19017	0.0179001	0.0125689	1.40782	1.27292	CCCAAGCGCACAAGGGCTAAGGGAGAGGCCCTGGATGTGTTGAAACGGAAATTTGAGATAAATCCAACCCCGAGCCTGGTCGAGAGGAAAAAGATTTCCGACCTCATCGGCATGCCTGAAAAGAACGTGAGAATCTGGTTCCAGAACCGGCGCGCAAAG
A_tiles_P07269:91	LKRKFEINPTPSLVERKKISDLIGMPEKNVRIWFQNRRAKLRKKQHGSNKDTI	PHO2	P07269	91	0.0207285	1.4005	1.04403	0.0222864	0.0160376	0.0249186	1.35261	1.3381	1.51772	0.017895	1.59709	1.91039	0.01846	0.0173472	1.45185	1.75685	CTCAAGCGGAAGTTCGAGATCAATCCCACCCCTTCCTTGGTCGAAAGAAAGAAGATCTCTGATCTGATCGGGATGCCAGAGAAAAACGTGCGCATATGGTTTCAGAACCGCAGGGCCAAACTGCGGAAAAAGCAGCACGGCAGCAACAAGGACACAATT
A_tiles_P07270:0	MGRTTSEGIHGFVDDLEPKSSILDKVGDFITVNTKRHDGREDFNEQNDELNSQ	PHO4	P07270	0	0.0145936	0.986004	-0.0436888	0.0143605	0.0113083	0.0191389	0.871571	0.943514	1.16569	0.00924799	0.825365	-0.783158	0.0110882	0.00771321	0.87207	0.781161	ATGGGGCGGACGACCAGTGAGGGCATCCATGGCTTCGTGGATGATCTCGAACCCAAATCTTCCATTCTGGACAAGGTCGGAGACTTCATCACAGTGAATACTAAGAGGCACGATGGTCGCGAAGACTTTAACGAGCAGAACGACGAGCTGAACAGCCAG
A_tiles_P07270:104	ATIKPRLLYSPLIHTQSAVPVTISPNLVATATSTTSANKVTKNKSNSSPYLNK	PHO4	P07270	104	0.0108154	0.730731	-0.972359	0.0105971	0.00948892	0.0125811	0.643158	0.79171	0.766281	0.0120417	1.0747	0.293951	0.0123915	0.0117018	0.974575	1.18511	GCCACCATCAAGCCCCGCCTGTTGTATTCCCCGCTGATTCACACGCAGAGTGCTGTGCCTGTTACAATCTCCCCAAATCTCGTCGCGACTGCCACTTCAACAACCTCTGCAAATAAAGTGACCAAAAACAAGAGCAACAGCAGCCCCTACCTGAACAAG
A_tiles_P07270:117	HTQSAVPVTISPNLVATATSTTSANKVTKNKSNSSPYLNKRRGKPGPDSATSL	PHO4	P07270	117	0.012397	0.883742	-0.383074		0.00995341	0.0154405		0.830465	0.940436								CACACCCAGTCCGCCGTGCCAGTTACCATCTCCCCTAATCTCGTCGCAACAGCTACATCTACTACGTCAGCGAACAAGGTGACTAAGAACAAGTCCAACAGCAGCCCGTACCTGAATAAAAGACGCGGCAAACCCGGGCCCGACAGTGCCACCAGCCTG
A_tiles_P07270:13	DDLEPKSSILDKVGDFITVNTKRHDGREDFNEQNDELNSQENHNSSENGNENE	PHO4	P07270	13	0.0111282	0.751866	-0.883983	0.00848184	0.0121388	0.0133845	0.514781	1.01281	0.815215	0.00872108	0.778339	-1.02253	0.0102239	0.00743917	0.804096	0.753407	GATGACCTGGAGCCCAAGAGTTCTATCCTCGACAAAGTGGGAGATTTCATTACAGTCAATACCAAGCGCCATGACGGGAGAGAAGACTTTAACGAGCAGAATGATGAACTGAACTCACAGGAGAACCACAACTCCAGCGAAAATGGCAACGAGAACGAG
A_tiles_P07270:130	LVATATSTTSANKVTKNKSNSSPYLNKRRGKPGPDSATSLFELPDSVIPTPKP	PHO4	P07270	130	0.0151385	1.02282	0.0699492	0.0139024	0.012912	0.0193272	0.843767	1.07731	1.17717	0.00959495	0.85633	-0.632874	0.00849924	0.0108319	0.668455	1.09701	CTGGTGGCAACCGCCACAAGCACTACAAGTGCTAACAAGGTGACCAAGAACAAGTCCAACTCCAGCCCGTACCTCAATAAAAGACGCGGCAAACCTGGACCAGATTCTGCCACCTCACTGTTCGAGTTGCCTGACAGCGTCATCCCCACGCCCAAGCCC
A_tiles_P07270:142	KVTKNKSNSSPYLNKRRGKPGPDSATSLFELPDSVIPTPKPKPKPKQYPKVIL	PHO4	P07270	142	0.020925	1.41378	1.07327	0.0201144	0.0148922	0.0305865	1.22079	1.24253	1.86294	0.0140795	1.25657	0.931904	0.0168614	0.0117566	1.32613	1.19066	AAGGTGACAAAGAACAAGTCCAACTCCAGTCCGTACCTGAATAAAAGACGCGGAAAACCCGGCCCCGATTCAGCCACTTCTCTGTTCGAGCTCCCTGACAGCGTCATTCCAACCCCTAAACCAAAACCGAAGCCCAAGCAGTATCCCAAGGTGATCTTG
A_tiles_P07270:155	NKRRGKPGPDSATSLFELPDSVIPTPKPKPKPKQYPKVILPSNSTRRVSPVTA	PHO4	P07270	155	0.0162144	1.09551	0.282748	0.015021	0.0130617	0.0217273	0.911654	1.0898	1.32335	0.0138157	1.23303	0.854737	0.0141313	0.0135073	1.11141	1.36796	AACAAGCGCAGAGGCAAGCCCGGGCCAGACTCCGCCACCTCCCTCTTCGAGCTGCCTGATTCTGTGATCCCTACACCAAAACCTAAACCCAAACCGAAGCAGTACCCGAAGGTGATTCTGCCCAGCAATAGCACTAGGCGGGTTAGTCCCGTCACGGCT
A_tiles_P07270:168	SLFELPDSVIPTPKPKPKPKQYPKVILPSNSTRRVSPVTAKTSSSAEGVVVAS	PHO4	P07270	168	0.0106893	0.722213	-1.0087	0.0085823	0.0110043	0.0129324	0.520878	0.918149	0.787675	0.0120005	1.07102	0.279965	0.0136207	0.010573	1.07125	1.07079	TCCCTGTTCGAGCTGCCCGACTCTGTTATCCCGACCCCAAAGCCAAAGCCTAAACCCAAACAGTACCCCAAGGTCATTCTCCCTTCAAACAGCACGAGACGCGTGAGTCCCGTGACAGCAAAGACTTCCAGCTCCGCTGAAGGCGTGGTGGTCGCCAGC
A_tiles_P07270:181	KPKPKPKQYPKVILPSNSTRRVSPVTAKTSSSAEGVVVASESPVIAPHGSSHS	PHO4	P07270	181	0.0113674	0.768027	-0.818064	0.0122445	0.00873571	0.0137322	0.743146	0.728866	0.836388	0.0103477	0.923513	-0.324681	0.0113231	0.00945632	0.890551	0.957695	AAGCCGAAGCCCAAGCCCAAACAGTACCCTAAGGTGATTCTGCCAAGCAACTCCACACGCAGAGTGAGTCCTGTCACTGCAAAAACCTCTAGTTCCGCCGAAGGAGTTGTGGTGGCTTCCGAGTCACCCGTCATCGCCCCACATGGCAGCTCTCACAGC
A_tiles_P07270:194	LPSNSTRRVSPVTAKTSSSAEGVVVASESPVIAPHGSSHSRSLSKRRSSGALV	PHO4	P07270	194	0.00952944	0.643849	-1.3647	0.0102428	0.00702492	0.0120266	0.621655	0.586126	0.732508	0.0116051	1.03573	0.143244	0.0130968	0.0102832	1.03005	1.04144	CTGCCGTCCAACAGCACTAGACGGGTTAGTCCTGTGACCGCGAAAACAAGCTCTTCCGCCGAGGGAGTGGTGGTCGCCTCTGAATCACCAGTCATCGCTCCCCATGGGTCATCCCACTCTCGCTCCCTGAGTAAGCGCAGGAGCAGCGGCGCACTCGTG
A_tiles_P07270:207	AKTSSSAEGVVVASESPVIAPHGSSHSRSLSKRRSSGALVDDDKRESHKHAEQ	PHO4	P07270	207	0.00923161	0.623727	-1.46312	0.00898406	0.00922	0.00949793	0.545261	0.769273	0.578492	0.0102459	0.914422	-0.365047	0.0113784	0.00922608	0.894893	0.934378	GCCAAGACCTCCTCCAGTGCGGAGGGAGTGGTGGTCGCATCTGAAAGCCCTGTTATCGCTCCCCATGGCTCCTCTCACAGTCGGTCACTGAGCAAGAGGCGCAGCTCCGGGGCCCTCGTGGATGACGACAAAAGAGAGAGCCACAAGCACGCCGAGCAG
A_tiles_P07270:220	SESPVIAPHGSSHSRSLSKRRSSGALVDDDKRESHKHAEQARRNRLAVALHEL	PHO4	P07270	220	0.0138109	0.933123	-0.214546	0.0136261	0.0113122	0.0170902	0.826996	0.943836	1.04092	0.00780227	0.696337	-1.47679	0.00885827	0.00687216	0.696692	0.695983	TCCGAGAGCCCCGTGATCGCTCCTCACGGCTCTAGCCACTCCAGAAGCCTCTCCAAGCGGAGGAGTTCAGGAGCACTGGTCGATGACGACAAAAGGGAATCTCATAAGCATGCCGAGCAGGCGCGGCGCAACCGCCTGGCCGTGGCCTTGCACGAGCTG
A_tiles_P07270:233	SRSLSKRRSSGALVDDDKRESHKHAEQARRNRLAVALHELASLIPAEWKQQNV	PHO4	P07270	233	0.0115222	0.778486	-0.77614	0.0156963	0.00880934	0.0110627	0.95264	0.73501	0.673799	0.0100383	0.895896	-0.448565	0.0129639	0.0077729	1.01959	0.787206	TCCCGCTCCTTGAGCAAGAGGCGGAGCAGTGGCGCCCTCGTGGACGACGATAAACGGGAATCTCACAAACATGCAGAGCAAGCTCGCAGGAACAGACTGGCTGTCGCCCTGCACGAGCTGGCCTCACTCATCCCCGCGGAGTGGAAGCAGCAGAATGTG
A_tiles_P07270:246	VDDDKRESHKHAEQARRNRLAVALHELASLIPAEWKQQNVSAAPSKATTVEAA	PHO4	P07270	246	0.0132325	0.894042	-0.347156	0.017031	0.0102127	0.0133212	1.03365	0.852099	0.811357	0.00886363	0.791061	-0.95637	0.0104645	0.00750763	0.823024	0.76034	GTGGACGACGATAAGCGCGAGAGCCACAAGCACGCCGAACAGGCAAGGCGGAATAGATTGGCTGTTGCCCTGCATGAACTCGCAAGTCTGATCCCCGCCGAGTGGAAACAACAGAACGTGTCTGCTGCGCCTTCCAAGGCCACAACCGTCGAGGCCGCG
A_tiles_P07270:259	QARRNRLAVALHELASLIPAEWKQQNVSAAPSKATTVEAACRYIRHLQQNVST	PHO4	P07270	259	0.0116896	0.789797	-0.731427	0.0104365	0.00973222	0.0157264	0.633413	0.812011	0.957852	0.0100913	0.900628	-0.427072	0.00923886	0.0110224	0.726625	1.1163	CAGGCCCGCAGAAACCGGCTGGCCGTCGCCCTGCATGAATTGGCAAGCCTCATTCCCGCTGAGTGGAAGCAACAGAATGTTTCTGCCGCTCCATCCAAAGCAACAACCGTGGAGGCCGCGTGCAGGTACATCCGCCACCTGCAGCAGAACGTGAGTACT
A_tiles_P07270:26	GDFITVNTKRHDGREDFNEQNDELNSQENHNSSENGNENENEQDSLALDDLDR	PHO4	P07270	26	0.0146312	0.988542	-0.0357186	0.0122199	0.0149902	0.0170985	0.741653	1.25071	1.04142	0.0181422	1.61915	1.96638	0.0223186	0.0147473	1.75533	1.49354	GGCGACTTCATCACCGTGAATACAAAGCGCCATGATGGAAGGGAAGACTTTAACGAGCAGAATGACGAGTTGAACAGCCAAGAGAACCACAACTCCAGTGAAAATGGGAATGAGAACGAAAACGAGCAGGATTCTCTGGCCCTCGATGACCTGGACCGG
A_tiles_P07270:39	REDFNEQNDELNSQENHNSSENGNENENEQDSLALDDLDRAFELVEGMDMDWM	PHO4	P07270	39	0.0827542	5.59122	5.33493	0.0827622	0.0739138	0.0926429	5.02301	6.16701	5.64262	0.021035	1.87733	2.57006	0.024458	0.018091	1.92359	1.83218	CGCGAGGACTTCAACGAGCAGAACGACGAACTGAATTCTCAGGAGAACCACAATAGTAGCGAGAACGGCAACGAGAACGAAAATGAACAAGACTCCCTGGCTCTCGATGATCTGGATAGAGCCTTTGAATTGGTGGAGGGGATGGACATGGACTGGATG
A_tiles_P07270:52	QENHNSSENGNENENEQDSLALDDLDRAFELVEGMDMDWMMPSHAHHSPATTA	PHO4	P07270	52	0.0447457	3.02321	3.42909	0.0417695	0.0393196	0.0545489	2.53508	3.28064	3.32242	0.0156153	1.39363	1.35436	0.0200642	0.0121529	1.57802	1.23079	CAGGAGAACCACAACTCCAGTGAGAACGGCAACGAGAATGAGAATGAACAGGACTCTTTGGCACTGGACGACCTCGATAGAGCTTTCGAACTGGTGGAAGGAATGGATATGGACTGGATGATGCCTTCACACGCGCATCACAGCCCCGCCACCACAGCC
A_tiles_P07270:65	ENEQDSLALDDLDRAFELVEGMDMDWMMPSHAHHSPATTATIKPRLLYSPLIH	PHO4	P07270	65	0.0381982	2.58083	2.93872	0.0422678	0.026277	0.0501816	2.56532	2.19243	3.05642	0.0137777	1.22963	0.843486	0.0167382	0.0113408	1.31644	1.14855	GAGAACGAGCAGGACTCCCTCGCGTTGGACGACCTGGACAGAGCCTTCGAACTGGTGGAGGGCATGGATATGGATTGGATGATGCCATCTCACGCTCACCATAGCCCTGCAACCACTGCCACAATTAAGCCCCGCCTGCTCTACAGTCCGCTGATCCAC
A_tiles_P07270:78	RAFELVEGMDMDWMMPSHAHHSPATTATIKPRLLYSPLIHTQSAVPVTISPNL	PHO4	P07270	78	0.0107347	0.725279	-0.995569	0.0115093	0.00794511	0.0135275	0.698523	0.662902	0.823922	0.00983265	0.877544	-0.533018	0.011992	0.0080621	0.943158	0.816495	CGCGCTTTCGAGCTCGTGGAAGGCATGGACATGGATTGGATGATGCCAAGCCATGCGCACCACTCACCCGCCACGACCGCAACTATCAAGCCTAGACTGCTGTACTCTCCGCTGATTCACACCCAGTCCGCCGTGCCTGTCACAATCAGTCCCAACTTG
A_tiles_P07270:91	MMPSHAHHSPATTATIKPRLLYSPLIHTQSAVPVTISPNLVATATSTTSANKV	PHO4	P07270	91	0.0133793	0.903959	-0.312965	0.0206185	0.0112158	0.0103564	1.25138	0.935793	0.63078	0.00926907	0.827246	-0.773866	0.0100152	0.0085785	0.787686	0.868793	ATGATGCCATCCCACGCGCACCACTCTCCCGCTACCACAGCTACCATTAAACCTAGATTGCTGTACTCACCGCTCATCCATACTCAGAGCGCCGTGCCCGTTACTATCAGTCCTAATCTGGTGGCAACCGCCACGAGCACAACCTCCGCCAACAAGGTC
A_tiles_P07272:0	MKQKKFNSKKSNRTDLSKRGDSPNIGISKSRTACKRCRLKKIKCDQEFPSCKR	PPR1	P07272	0	0.160534			0.164516	0.18626	0.135012	9.98479	15.5406	8.22319	0.0210774	1.88112	2.57828	0.0251335	0.0176759	1.97672	1.79014	ATGAAGCAGAAGAAGTTTAACTCAAAGAAGTCCAACCGCACCGACCTCAGCAAAAGAGGAGATTCCCCCAATATTGGCATCTCTAAGAGTAGGACAGCCTGTAAACGGTGTCGCCTGAAAAAAATCAAGTGCGACCAGGAGTTCCCTAGCTGCAAGCGG
A_tiles_P07272:103	NIPATSDDEPFDLKKYSSVSSLGEEGILPHNGLLADYLVQKGNSMASSAITSK	PPR1	P07272	103	0.0144158	0.973991	-0.0816818	0.0151302	0.0106235	0.0186381	0.91828	0.886378	1.1352	0.00869557	0.776062	-1.03448	0.00939556	0.00804772	0.738949	0.815039	AACATTCCAGCCACCTCCGACGATGAGCCCTTCGACCTGAAGAAATACAGTTCCGTGTCCTCTCTCGGTGAGGAAGGCATCTTGCCTCACAATGGGCTCCTGGCTGATTATCTGGTCCAGAAGGGAAACAGCATGGCAAGCTCAGCCATCACAAGCAAG
A_tiles_P07272:116	KKYSSVSSLGEEGILPHNGLLADYLVQKGNSMASSAITSKSMASPQTINVQRK	PPR1	P07272	116	0.0129968	0.878121	-0.402853	0.0126849	0.0107023	0.0161714	0.769872	0.892951	0.984955	0.00839182	0.748954	-1.17956	0.00961288	0.00732587	0.756041	0.741932	AAGAAATACTCCAGCGTCTCATCTTTGGGCGAGGAAGGGATTCTGCCCCACAATGGACTGCTGGCTGACTATCTCGTGCAAAAAGGTAACTCTATGGCCTCCAGTGCAATCACATCCAAGAGCATGGCCAGCCCTCAGACCATCAACGTGCAGCGCAAG
A_tiles_P07272:129	ILPHNGLLADYLVQKGNSMASSAITSKSMASPQTINVQRKEFLVNSKKQDGSA	PPR1	P07272	129	0.0115065	0.777425	-0.780368	0.0111902	0.00942053	0.0144515	0.679156	0.786004	0.880198	0.00756115	0.674817	-1.60489	0.00876978	0.00651909	0.689732	0.660225	ATCCTGCCCCACAACGGGCTCTTGGCGGACTACCTGGTGCAGAAGGGAAATTCAATGGCTTCTTCCGCCATTACAAGCAAAAGTATGGCCAGCCCTCAAACCATCAACGTGCAGAGAAAAGAGTTCCTGGTCAACTCCAAGAAGCAGGATGGCAGCGCA
A_tiles_P07272:13	TDLSKRGDSPNIGISKSRTACKRCRLKKIKCDQEFPSCKRCAKLEVPCVSLDP	PPR1	P07272	13	0.0260745	1.7617	1.75521	0.0286379	0.0250154	0.0247457	1.7381	2.08716	1.50719	0.0103512	0.923826	-0.323297	0.0114178	0.00938432	0.897993	0.950403	ACCGACCTGTCCAAGAGGGGCGACTCTCCCAACATCGGAATTAGCAAAAGCCGGACAGCTTGTAAGCGCTGTAGACTGAAGAAGATCAAGTGCGATCAGGAATTCCCAAGTTGCAAACGCTGCGCCAAACTCGAGGTCCCGTGCGTGTCCTTGGACCCT
A_tiles_P07272:142	QKGNSMASSAITSKSMASPQTINVQRKEFLVNSKKQDGSALLPETGSPMTSDA	PPR1	P07272	142	0.0104615	0.706826	-1.07545	0.0100956	0.0116987	0.00969437	0.612722	0.976081	0.590457	0.0107734	0.961506	-0.160176	0.0134415	0.00863494	1.05716	0.874509	CAGAAGGGCAACAGCATGGCTTCTTCTGCCATCACTTCCAAAAGTATGGCATCCCCTCAGACAATTAACGTGCAGCGCAAGGAGTTCCTCGTCAATTCAAAGAAACAAGATGGGAGCGCGCTGCTGCCAGAAACGGGAAGCCCCATGACCTCCGACGCC
A_tiles_P07272:155	KSMASPQTINVQRKEFLVNSKKQDGSALLPETGSPMTSDARAEELRRCNKEIS	PPR1	P07272	155	0.0100439	0.678605	-1.20174	0.00905703	0.00945808	0.011828	0.54969	0.789137	0.720413	0.00770742	0.687871	-1.52671	0.00763344	0.0077821	0.600361	0.788138	AAGAGCATGGCCAGTCCACAGACTATTAACGTGCAGCGCAAGGAGTTCCTCGTCAATTCAAAGAAACAAGATGGCAGCGCATTGCTGCCCGAAACAGGATCTCCTATGACCTCCGACGCTCGGGCCGAAGAGCTGAGAAGGTGCAACAAAGAGATCTCC
A_tiles_P07272:168	KEFLVNSKKQDGSALLPETGSPMTSDARAEELRRCNKEISALGTMRESSFNSF	PPR1	P07272	168	0.0126443	0.854302	-0.488088	0.0116245	0.0105073	0.0165508	0.705517	0.876677	1.00806	0.0091967	0.820787	-0.80585	0.00981803	0.0086147	0.772176	0.872459	AAGGAGTTCCTGGTGAACTCCAAGAAACAGGACGGCTCCGCTCTCTTGCCCGAAACTGGATCTCCTATGACCAGCGATGCCCGGGCAGAGGAACTGAGGAGATGCAATAAAGAGATCTCAGCCCTGGGGACAATGCGCGAGAGTTCCTTTAACAGCTTC
A_tiles_P07272:181	ALLPETGSPMTSDARAEELRRCNKEISALGTMRESSFNSFLGDSSGISFAKLV	PPR1	P07272	181	0.0143071	0.966646	-0.105144	0.0148308	0.011525	0.0171335	0.900114	0.961591	1.04355	0.00808328	0.721416	-1.33242	0.00950835	0.00687178	0.74782	0.695944	GCCCTGCTCCCCGAGACTGGCAGCCCTATGACCTCAGATGCGAGGGCAGAAGAACTGCGGAGATGCAATAAGGAGATTTCTGCTTTGGGAACAATGCGCGAGAGCTCCTTTAACAGTTTCCTGGGCGACTCCTCCGGGATCAGCTTCGCCAAACTCGTG
A_tiles_P07272:193	DARAEELRRCNKEISALGTMRESSFNSFLGDSSGISFAKLVFTATNFRQDSGD	PPR1	P07272	193	0.0166613	1.12571	0.367027	0.0203974	0.0114478	0.0198077	1.23796	0.955146	1.20643	0.0079471	0.709263	-1.40175	0.00790065	0.00799383	0.621376	0.80958	GACGCTCGCGCCGAGGAGCTGAGGCGGTGCAATAAAGAAATCAGCGCACTCGGGACTATGCGCGAGTCATCTTTCAACAGCTTTCTGGGTGATTCCAGTGGAATTAGCTTCGCCAAGTTGGTGTTTACAGCGACCAACTTCAGACAGGACTCCGGCGAC
A_tiles_P07272:206	ISALGTMRESSFNSFLGDSSGISFAKLVFTATNFRQDSGDDVLDEDIKQREQK	PPR1	P07272	206	0.0185014	1.25003	0.691725	0.0190766	0.0144889	0.0229127	1.1578	1.20889	1.39555	0.0100662	0.898389	-0.437228	0.0101386	0.0099943	0.79739	1.01218	ATCTCCGCCCTGGGCACTATGCGCGAAAGTTCATTCAACAGCTTTTTGGGAGACTCTAGCGGCATTTCCTTCGCAAAGCTCGTCTTCACCGCTACAAATTTTAGACAAGATTCCGGGGATGACGTGCTGGACGAGGACATCAAACAGCGGGAGCAGAAG
A_tiles_P07272:219	SFLGDSSGISFAKLVFTATNFRQDSGDDVLDEDIKQREQKYNGYAEAENNPHF	PPR1	P07272	219	0.016156	1.09157	0.271565	0.0180473	0.012878	0.0181443	1.09533	1.07448	1.10512	0.00852411	0.760759	-1.11574	0.00859628	0.00845254	0.676087	0.856037	AGCTTCCTCGGCGACTCCTCTGGGATTAGTTTCGCCAAGCTGGTCTTTACAGCTACCAACTTTAGGCAAGACTCAGGAGATGACGTGCTGGACGAAGATATCAAACAGAGAGAGCAGAAGTATAACGGCTACGCAGAGGCCGAGAACAATCCCCACTTC
A_tiles_P07272:232	LVFTATNFRQDSGDDVLDEDIKQREQKYNGYAEAENNPHFDPLELPPRHAAEV	PPR1	P07272	232	0.0144284	0.974845	-0.0789681	0.0126677	0.0153567	0.0154405	0.768828	1.28129	0.940436	0.00888328	0.792815	-0.947337	0.0100045	0.00788768	0.786844	0.79883	TTGGTGTTCACCGCTACAAACTTCCGGCAGGACTCCGGCGATGACGTCCTCGATGAAGACATCAAACAAAGAGAGCAGAAGTACAACGGATATGCGGAGGCAGAAAACAATCCGCATTTTGACCCACTGGAGCTGCCTCCCCGCCACGCCGCCGAGGTG
A_tiles_P07272:245	DDVLDEDIKQREQKYNGYAEAENNPHFDPLELPPRHAAEVMISRFFVDTNSQL	PPR1	P07272	245	0.0207909	1.40472	1.05335	0.021904	0.0155588	0.0263707	1.3294	1.29815	1.60617	0.0102021	0.910521	-0.382494	0.0114899	0.00905874	0.903664	0.91743	GACGACGTGTTGGACGAGGATATTAAGCAGCGGGAGCAAAAATACAACGGCTATGCAGAAGCCGAGAACAATCCACACTTTGATCCGCTGGAACTCCCTCCCAGACATGCCGCTGAGGTGATGATCTCCCGCTTCTTCGTCGACACCAACAGCCAGCTG
A_tiles_P07272:258	KYNGYAEAENNPHFDPLELPPRHAAEVMISRFFVDTNSQLPLLHRELFLKKYF	PPR1	P07272	258	0.0146093	0.987065	-0.0403534	0.0177012	0.0116731	0.0150902	1.07433	0.973952	0.919103	0.0113479	1.01278	0.0518233	0.0126962	0.0101429	0.998538	1.02723	AAGTACAACGGCTATGCCGAGGCTGAGAACAATCCCCACTTTGACCCGCTCGAATTGCCACCTAGGCATGCAGCCGAAGTCATGATCAGCAGATTTTTCGTGGATACCAACTCCCAGCTGCCCCTGCTGCACCGCGAGCTCTTCCTGAAAAAGTACTTC
A_tiles_P07272:26	ISKSRTACKRCRLKKIKCDQEFPSCKRCAKLEVPCVSLDPATGKDVPRSYVFF	PPR1	P07272	26	0.0207965	1.4051	1.05418	0.0215498	0.0211336	0.0197495	1.3079	1.76329	1.20288	0.011215	1.00092	0.00375141	0.012561	0.0100133	0.987909	1.0141	ATCTCTAAGAGCAGGACAGCCTGCAAGCGGTGCCGCCTGAAGAAGATTAAATGCGACCAGGAGTTCCCCAGTTGTAAAAGATGCGCTAAACTCGAAGTGCCTTGTGTGTCACTGGATCCAGCAACCGGCAAGGACGTTCCGCGCTCCTACGTCTTTTTC
A_tiles_P07272:271	FDPLELPPRHAAEVMISRFFVDTNSQLPLLHRELFLKKYFEPIYGPWNPNIAL	PPR1	P07272	271	0.0116142	0.784706	-0.751472	0.0115153	0.00992231	0.0137115	0.698886	0.82787	0.835127	0.0141808	1.26561	0.961149	0.0139205	0.0144459	1.09483	1.46302	TTCGACCCTCTGGAGCTGCCTCCCAGGCACGCTGCCGAAGTCATGATCAGCCGCTTTTTTGTGGATACCAATTCCCAGCTCCCACTGCTGCATAGAGAGCTGTTCCTCAAAAAGTATTTCGAGCCCATTTACGGCCCGTGGAACCCCAACATCGCATTG
A_tiles_P07272:284	VMISRFFVDTNSQLPLLHRELFLKKYFEPIYGPWNPNIALASDQTGINSAFEI	PPR1	P07272	284	0.0259885	1.75589	1.74498	0.0317055	0.0218556	0.0253307	1.92428	1.82353	1.54282	0.0162777	1.45276	1.52389	0.0187164	0.0141568	1.47202	1.43374	GTGATGATCTCCCGCTTCTTTGTCGACACCAACAGTCAGTTGCCACTCCTCCACAGGGAACTGTTTCTGAAGAAATACTTCGAGCCCATATATGGCCCTTGGAACCCGAATATTGCTCTGGCCTCTGATCAGACAGGGATCAACAGCGCATTCGAGATC
A_tiles_P07272:297	LPLLHRELFLKKYFEPIYGPWNPNIALASDQTGINSAFEIPITSAFSAHTEPK	PPR1	P07272	297	0.00752264	0.508261	-2.09765	0.0091588	0.00647673	0.00717656	0.555867	0.540387	0.437104	0.00880867	0.786156	-0.981753	0.0113506	0.00683599	0.89271	0.69232	CTGCCGCTGCTGCATCGCGAGTTGTTCCTCAAGAAGTACTTTGAACCAATCTATGGCCCTTGGAACCCCAACATAGCCCTCGCTTCTGACCAGACAGGAATTAATAGTGCATTCGAGATCCCCATCACTAGCGCGTTCTCCGCCCACACCGAGCCTAAA
A_tiles_P07272:309	YFEPIYGPWNPNIALASDQTGINSAFEIPITSAFSAHTEPKRENVTEKIDVCS	PPR1	P07272	309	0.0243898	1.64788	1.54819	0.0245603	0.020312	0.0290831	1.49061	1.69473	1.77137	0.0118704	1.05941	0.235496	0.013695	0.0102889	1.07709	1.04202	TACTTCGAGCCCATCTATGGCCCGTGGAACCCTAACATCGCGCTGGCTTCTGATCAGACAGGGATTAATTCCGCCTTTGAAATTCCCATAACGTCAGCCTTCAGTGCACACACCGAACCAAAAAGAGAGAACGTCACTGAGAAGATCGACGTGTGCAGC
A_tiles_P07272:322	ALASDQTGINSAFEIPITSAFSAHTEPKRENVTEKIDVCSSVDVPWYDTWETS	PPR1	P07272	322	0.0513083	3.46661	3.85328	0.0499333	0.0461578	0.0586041	3.03055	3.85119	3.56941	0.0103711	0.925599	-0.315477	0.0131119	0.00820319	1.03123	0.830784	GCCCTGGCGAGCGACCAGACCGGCATTAATAGCGCATTCGAGATCCCTATAACTTCCGCTTTTTCCGCCCACACAGAACCAAAGAGAGAGAACGTGACGGAAAAAATCGATGTGTGCTCAAGTGTTGACGTCCCCTGGTACGACACCTGGGAGACCTCT
A_tiles_P07272:335	EIPITSAFSAHTEPKRENVTEKIDVCSSVDVPWYDTWETSQKVNMRPIVELPT	PPR1	P07272	335																	GAGATCCCCATCACGTCCGCCTTCAGCGCTCACACCGAGCCGAAGAGAGAGAATGTTACCGAAAAAATTGACGTCTGCTCTTCAGTGGACGTCCCTTGGTACGATACTTGGGAAACAAGTCAGAAGGTGAACATGCGCCCAATAGTGGAGCTGCCCACC
A_tiles_P07272:348	PKRENVTEKIDVCSSVDVPWYDTWETSQKVNMRPIVELPTKFHIPYFFLNIIF	PPR1	P07272	348	0.0129205	0.872962	-0.421114	0.0154012	0.0125334	0.011174	0.934733	1.04573	0.680579	0.0132138	1.1793	0.67296	0.0155988	0.0111934	1.22682	1.13362	CCCAAGCGCGAGAACGTCACCGAGAAAATTGACGTGTGCAGCTCTGTGGATGTTCCTTGGTATGACACTTGGGAAACGTCCCAGAAGGTCAATATGAGACCAATAGTGGAGCTCCCCACAAAGTTTCACATCCCGTACTTCTTCCTGAACATCATCTTC
A_tiles_P07272:361	SSVDVPWYDTWETSQKVNMRPIVELPTKFHIPYFFLNIIFAIGHATQVLKSDI	PPR1	P07272	361	0.00982384	0.66374	-1.2704	0.0113917	0.00959015	0.00867823	0.691384	0.800156	0.528566	0.0201868	1.80163	2.40212	0.0214346	0.0190117	1.68581	1.92542	TCCAGTGTGGACGTGCCCTGGTATGATACCTGGGAAACTTCTCAGAAAGTCAATATGAGGCCTATTGTGGAGCTCCCGACAAAGTTCCACATCCCATACTTTTTCCTGAACATAATCTTCGCCATTGGCCATGCTACGCAGGTTCTGAAGAGCGACATC
A_tiles_P07272:374	SQKVNMRPIVELPTKFHIPYFFLNIIFAIGHATQVLKSDITTVATYKRRATKY	PPR1	P07272	374	0.0132602	0.895918	-0.340661	0.0132259	0.0122478	0.0143937	0.802709	1.02189	0.876678	0.0182608	1.62974	1.99296	0.0223572	0.0149149	1.75837	1.51052	AGCCAGAAAGTCAATATGCGCCCAATTGTGGAGCTCCCCACTAAGTTCCACATCCCTTACTTTTTCCTGAACATCATCTTCGCTATTGGCCATGCAACCCAGGTTCTGAAATCCGACATAACAACCGTGGCCACGTATAAGCGGAGGGCCACCAAGTAC
A_tiles_P07272:387	TKFHIPYFFLNIIFAIGHATQVLKSDITTVATYKRRATKYIASLFSSSDRLEA	PPR1	P07272	387	0.013517	0.913264	-0.281223	0.0166196	0.0103935	0.0142973	1.00868	0.867188	0.87081	0.0105797	0.944214	-0.234226	0.0115297	0.00970792	0.906797	0.983176	ACCAAGTTCCACATCCCCTACTTTTTCTTGAACATCATCTTTGCAATAGGCCATGCGACCCAGGTCCTGAAAAGCGATATTACCACAGTGGCCACGTATAAAAGGCGCGCTACTAAGTACATTGCCAGTCTCTTCTCATCCTCTGACCGGCTGGAGGCC
A_tiles_P07272:39	KKIKCDQEFPSCKRCAKLEVPCVSLDPATGKDVPRSYVFFLEDRLAVMMRVLK	PPR1	P07272	39	0.0124574	0.841677	-0.534233	0.0133183	0.00983604	0.0147577	0.808314	0.820672	0.89885	0.0120699	1.07721	0.303484	0.0141301	0.01031	1.11131	1.04415	AAGAAGATCAAGTGCGACCAGGAGTTCCCCTCTTGCAAACGGTGTGCCAAATTGGAAGTTCCTTGTGTCAGCCTCGATCCAGCAACCGGCAAAGACGTGCCGCGCTCCTACGTGTTTTTCCTGGAGGACAGACTGGCTGTCATGATGAGGGTGCTGAAG
A_tiles_P07272:400	FAIGHATQVLKSDITTVATYKRRATKYIASLFSSSDRLEALAGTLLMVIYSIM	PPR1	P07272	400	0.0109668	0.740964	-0.929255	0.00985264	0.0112202	0.0119313	0.597978	0.936161	0.726701	0.0114383	1.02084	0.0841816	0.011324	0.0115538	0.890615	1.17012	TTCGCGATCGGCCACGCCACCCAGGTGCTGAAGAGCGACATTACAACTGTCGCCACGTATAAAAGGCGGGCTACCAAGTACATAGCTAGTCTCTTTTCCTCATCTGATCGCCTGGAGGCATTGGCCGGGACCCTCCTGATGGTGATCTACAGCATCATG
A_tiles_P07272:413	ITTVATYKRRATKYIASLFSSSDRLEALAGTLLMVIYSIMRPNVPGVWYTMGS	PPR1	P07272	413	0.0117856	0.796282	-0.706084	0.00960137	0.0101405	0.0168135	0.582727	0.846071	1.02407	0.0137469	1.22688	0.83434	0.0157834	0.0119731	1.24134	1.21258	ATCACGACCGTGGCCACCTACAAACGGCGCGCGACTAAGTACATAGCCAGCCTGTTCTCAAGTTCTGACAGACTCGAGGCATTGGCTGGAACACTGCTGATGGTTATTTATTCCATCATGAGGCCTAACGTGCCCGGGGTCTGGTACACCATGGGCAGC
A_tiles_P07272:425	KYIASLFSSSDRLEALAGTLLMVIYSIMRPNVPGVWYTMGSVLRLTVDLGLHS	PPR1	P07272	425	0.00603995	0.408085	-2.77806	0.00696723	0.00625643	0.00505492	0.422856	0.522007	0.307881	0.00976712	0.871696	-0.560305	0.0123692	0.0077124	0.972825	0.781079	AAGTACATCGCCAGTCTGTTCTCTAGCAGCGATCGCCTCGAGGCACTCGCTGGAACATTGCTCATGGTGATTTATTCCATCATGAGACCCAACGTGCCTGGTGTTTGGTACACCATGGGGTCAGTGCTGAGGCTGACTGTCGACCTGGGCCTGCACTCC
A_tiles_P07272:438	EALAGTLLMVIYSIMRPNVPGVWYTMGSVLRLTVDLGLHSEKINKNYDAFTRE	PPR1	P07272	438	0.00921147	0.622366	-1.46989	0.00873503	0.00784388	0.0114075	0.530147	0.654456	0.6948	0.0122531	1.09357	0.36497	0.0139557	0.0107583	1.09759	1.08955	GAGGCACTGGCCGGCACTCTGCTCATGGTTATCTACAGCATTATGCGCCCTAATGTGCCCGGTGTGTGGTATACAATGGGATCTGTGCTGAGATTGACGGTCGATCTGGGGCTCCACTCCGAAAAAATCAACAAGAACTACGACGCTTTCACCCGGGAG
A_tiles_P07272:451	IMRPNVPGVWYTMGSVLRLTVDLGLHSEKINKNYDAFTREIRRRLFWCVYSLD	PPR1	P07272	451	0.00906532	0.612491	-1.51946	0.0102892	0.00748396	0.00967473	0.62447	0.624426	0.589261	0.0128564	1.1474	0.561069	0.0130968	0.0126203	1.03005	1.27813	ATCATGCGCCCCAACGTGCCAGGAGTGTGGTATACTATGGGGTCTGTCCTCAGATTGACAGTTGACCTGGGCCTCCACAGCGAGAAGATTAACAAAAATTACGATGCCTTTACCCGGGAAATCCGGCGCAGGCTGTTCTGGTGCGTGTACTCCCTGGAC
A_tiles_P07272:464	GSVLRLTVDLGLHSEKINKNYDAFTREIRRRLFWCVYSLDRQICSYFGRPFGI	PPR1	P07272	464	0.0119675	0.808576	-0.658595	0.0141472	0.0111577	0.0108584	0.858623	0.930945	0.661356	0.0124801	1.11383	0.439877	0.0119132	0.0130741	0.936956	1.32409	GGCAGTGTCCTGCGGCTGACCGTGGACCTCGGGCTGCACAGCGAAAAAATCAACAAGAATTACGACGCCTTTACACGCGAGATACGCAGGAGACTCTTTTGGTGTGTGTATTCTTTGGATAGGCAGATCTGCTCCTACTTCGGACGGCCCTTCGGCATT
A_tiles_P07272:477	SEKINKNYDAFTREIRRRLFWCVYSLDRQICSYFGRPFGIPEESITTRYPSLL	PPR1	P07272	477	0.0147256	0.994923	-0.0157759	0.0179863	0.0121135	0.0146557	1.09163	1.01069	0.892636	0.0175692	1.56801	1.83542	0.018429	0.0167494	1.44942	1.69631	AGTGAGAAGATCAACAAAAATTACGACGCCTTCACCCGCGAAATTAGGAGGCGGCTGTTTTGGTGTGTGTATTCTCTGGATCGGCAGATATGCTCATACTTCGGAAGACCATTCGGCATCCCCGAGGAGAGCATCACTACACGCTACCCTTCCTTGCTC
A_tiles_P07272:490	EIRRRLFWCVYSLDRQICSYFGRPFGIPEESITTRYPSLLDDSFITLTNREID	PPR1	P07272	490	0.012941	0.87435	-0.416191	0.0100042	0.0147387	0.0146982	0.607177	1.22973	0.895223	0.0132226	1.18009	0.675668	0.0122237	0.014303	0.96138	1.44855	GAGATTCGCCGGCGCCTGTTCTGGTGCGTGTACTCTCTGGATAGACAGATCTGTTCCTACTTTGGCAGGCCTTTCGGAATACCAGAGGAAAGCATTACTACACGGTATCCCTCATTGCTGGACGACAGTTTCATCACCCTCACCAACAGGGAGATCGAC
A_tiles_P07272:503	DRQICSYFGRPFGIPEESITTRYPSLLDDSFITLTNREIDDYSDLPSPNPSSK	PPR1	P07272	503	0.0296971	2.00646	2.15844	0.0309519	0.0235231	0.0359716	1.87854	1.96265	2.19093	0.0121708	1.08622	0.337463	0.0141235	0.0104881	1.11079	1.06219	GACCGCCAGATCTGCTCCTACTTCGGGAGGCCTTTTGGCATCCCAGAGGAATCCATTACTACGCGGTATCCTAGCCTGCTCGATGACAGTTTCATCACCCTGACAAATAGAGAGATAGACGACTACTCCGATTTGCCGTCACCCAACCCCAGCTCTAAG
A_tiles_P07272:516	IPEESITTRYPSLLDDSFITLTNREIDDYSDLPSPNPSSKVIALAMYKIRRIQ	PPR1	P07272	516	0.0128856	0.870607	-0.429487	0.0138931	0.0107213	0.0143638	0.843202	0.894537	0.874857	0.00958802	0.855711	-0.635822	0.0123782	0.00742676	0.973532	0.75215	ATCCCGGAGGAAAGCATTACCACTCGGTACCCTTCACTGTTGGATGACAGCTTCATCACACTGACGAACAGAGAGATTGACGACTATAGTGATCTGCCCTCCCCAAATCCCTCCTCTAAAGTGATAGCTCTCGCCATGTACAAGATCAGGCGCATCCAG
A_tiles_P07272:52	RCAKLEVPCVSLDPATGKDVPRSYVFFLEDRLAVMMRVLKEYGVDPTKIRGNI	PPR1	P07272	52	0.00990209	0.669027	-1.2458	0.0109965	0.00779765	0.011323	0.667401	0.650599	0.689653	0.0106054	0.946512	-0.22431	0.0106857	0.0105257	0.840418	1.066	AGATGCGCCAAGCTGGAGGTGCCCTGTGTGTCCCTGGACCCTGCTACAGGAAAAGATGTTCCACGGAGCTATGTCTTTTTCTTGGAAGATCGCCTGGCAGTGATGATGCGCGTGCTCAAGGAGTACGGGGTCGACCCGACCAAGATTAGGGGCAACATC
A_tiles_P07272:529	LDDSFITLTNREIDDYSDLPSPNPSSKVIALAMYKIRRIQASIVRILYAPGAE	PPR1	P07272	529	0.0128008	0.864878	-0.449951	0.0128285	0.0113212	0.0144426	0.778591	0.944584	0.87966	0.013967	1.24653	0.899176	0.0166055	0.0117478	1.306	1.18976	CTGGACGACAGCTTCATCACCTTGACAAACCGGGAGATCGACGATTACTCCGATCTGCCAAGTCCTAATCCGTCTTCCAAAGTCATAGCCCTCGCGATGTATAAGATTCGCAGGATTCAGGCCAGCATCGTGAGAATCCTGTACGCACCCGGCGCTGAA
A_tiles_P07272:542	DDYSDLPSPNPSSKVIALAMYKIRRIQASIVRILYAPGAELPRRFMDLESWRI	PPR1	P07272	542	0.0112038	0.756976	-0.86299	0.0119271	0.0102335	0.0115222	0.723883	0.853835	0.701783	0.0144642	1.2909	1.0419	0.0129948	0.0160997	1.02203	1.63051	GACGACTACTCCGATCTGCCCTCACCAAACCCTAGCTCCAAGGTGATCGCACTGGCGATGTATAAAATACGGCGGATTCAGGCCTCTATCGTCCGCATTTTGTACGCCCCGGGCGCTGAACTGCCCAGACGCTTCATGGACCTCGAGAGTTGGAGGATC
A_tiles_P07272:554	SKVIALAMYKIRRIQASIVRILYAPGAELPRRFMDLESWRIETYNELERWFQV	PPR1	P07272	554	0.0117149	0.791508	-0.72472	0.0113283	0.0105524	0.0134493	0.687539	0.880444	0.819158	0.0122271	1.09125	0.356305	0.0126887	0.0117824	0.997949	1.19327	AGCAAGGTCATCGCCTTGGCCATGTACAAAATCCGCAGGATACAGGCGAGTATTGTGCGGATTCTGTATGCTCCCGGCGCAGAACTGCCTAGACGGTTTATGGACCTGGAATCCTGGAGGATCGAGACCTACAACGAGCTCGAGCGCTGGTTCCAGGTG
A_tiles_P07272:567	IQASIVRILYAPGAELPRRFMDLESWRIETYNELERWFQVDVPKNFEMMNCKF	PPR1	P07272	567	0.0114043	0.770521	-0.808017	0.0123328	0.00838146	0.014349	0.748503	0.699309	0.873957	0.017724	1.58183	1.87121	0.0218769	0.0143594	1.72059	1.45426	ATCCAGGCCTCCATCGTGAGGATTTTGTACGCTCCCGGCGCAGAACTCCCTCGCCGGTTTATGGATCTGGAGAGCTGGAGAATAGAGACCTATAATGAACTGGAGCGCTGGTTCCAGGTGGACGTCCCAAAAAACTTCGAGATGATGAACTGCAAGTTC
A_tiles_P07272:580	AELPRRFMDLESWRIETYNELERWFQVDVPKNFEMMNCKFNSIWFDLNYHYSK	PPR1	P07272	580	0.0122362	0.826727	-0.589785	0.0144505	0.0118365	0.010711	0.877034	0.98758	0.652375	0.0136362	1.21701	0.801372	0.0130968	0.0141978	1.03005	1.43789	GCCGAACTGCCTCGGCGCTTTATGGATCTGGAGTCTTGGAGGATTGAAACCTACAATGAGTTGGAGAGATGGTTTCAGGTCGACGTGCCCAAAAATTTCGAGATGATGAACTGCAAGTTCAACAGCATCTGGTTCGACCTCAACTACCACTATTCCAAG
A_tiles_P07272:593	RIETYNELERWFQVDVPKNFEMMNCKFNSIWFDLNYHYSKSILYGLSPKFPTL	PPR1	P07272	593																	CGCATTGAGACCTACAATGAACTGGAGAGGTGGTTTCAGGTGGATGTCCCTAAGAACTTCGAGATGATGAACTGCAAGTTCAACTCTATCTGGTTCGACCTCAATTACCACTACTCCAAGAGTATCCTGTATGGCTTGAGCCCCAAATTTCCAACACTG
A_tiles_P07272:606	VDVPKNFEMMNCKFNSIWFDLNYHYSKSILYGLSPKFPTLNDTAFKIVLDSTK	PPR1	P07272	606	0.0122763	0.829437	-0.579642	0.0132709	0.0134066	0.0103987	0.805439	1.11859	0.633355								GTGGATGTGCCCAAGAACTTTGAGATGATGAACTGCAAGTTCAACAGCATCTGGTTCGACCTCAATTACCACTACTCAAAGTCTATCTTGTATGGCCTGTCCCCTAAGTTCCCAACACTGAATGACACTGCCTTTAAAATTGTCCTGGACAGTACCAAA
A_tiles_P07272:619	FNSIWFDLNYHYSKSILYGLSPKFPTLNDTAFKIVLDSTKGTIDVFYNLCVNK	PPR1	P07272	619	0.0114373	0.772751	-0.799058	0.0130351	0.00912812	0.012574	0.791128	0.761607	0.765845	0.0157081	1.40192	1.37854	0.0176264	0.0139986	1.38629	1.41772	TTCAACTCCATTTGGTTCGACCTGAACTACCACTACTCAAAGAGCATACTCTATGGGTTGTCTCCCAAATTCCCTACGCTCAATGATACAGCCTTTAAGATCGTCCTGGACAGTACTAAAGGCACCATCGACGTGTTTTACAATCTGTGCGTGAACAAG
A_tiles_P07272:632	KSILYGLSPKFPTLNDTAFKIVLDSTKGTIDVFYNLCVNKKIGYTWVAVHNMF	PPR1	P07272	632	0.0111647	0.754335	-0.873819	0.0100793	0.0108393	0.0127384	0.611731	0.904377	0.77586	0.0131299	1.17182	0.64697	0.0139884	0.012324	1.10017	1.24813	AAGTCCATACTCTACGGGCTGTCTCCTAAGTTTCCCACCTTGAACGATACAGCCTTCAAAATTGTTCTGGACAGCACTAAGGGAACCATCGACGTGTTCTATAACCTGTGCGTGAATAAGAAAATCGGCTACACGTGGGTCGCTGTGCACAACATGTTC
A_tiles_P07272:64	DPATGKDVPRSYVFFLEDRLAVMMRVLKEYGVDPTKIRGNIPATSDDEPFDLK	PPR1	P07272	64	0.0138469	0.935555	-0.206479	0.0154573	0.0105	0.0163581	0.938139	0.876073	0.996323	0.0114827	1.02481	0.100001	0.0116223	0.0113448	0.914078	1.14896	GACCCGGCCACCGGCAAGGACGTGCCTAGGTCCTACGTGTTCTTTCTCGAAGATCGGCTGGCTGTTATGATGAGAGTCTTGAAAGAGTATGGGGTGGATCCCACAAAAATTCGCGGAAACATCCCAGCAACTAGCGATGACGAGCCCTTCGACCTGAAG
A_tiles_P07272:645	LNDTAFKIVLDSTKGTIDVFYNLCVNKKIGYTWVAVHNMFMTGMTYLYVNFYS	PPR1	P07272	645	0.00940149	0.635205	-1.4066	0.00816696	0.00871749	0.0116718	0.49567	0.727346	0.710899	0.0114054	1.01791	0.0724232	0.0116187	0.011196	0.913798	1.13388	CTGAATGACACCGCCTTTAAGATTGTTCTGGATTCCACCAAAGGAACCATCGACGTCTTCTATAACTTGTGCGTCAACAAGAAGATCGGCTATACATGGGTGGCTGTGCACAATATGTTCATGACTGGGATGACGTACCTCTACGTGAACTTCTACAGC
A_tiles_P07272:658	KGTIDVFYNLCVNKKIGYTWVAVHNMFMTGMTYLYVNFYSKNNINDCQEKVSE	PPR1	P07272	658	0.014349	0.969478	-0.0960789	0.0134887	0.0130165	0.0168268	0.818655	1.08603	1.02487	0.0103991	0.928101	-0.304462	0.0113109	0.00956083	0.889589	0.968279	AAAGGGACGATCGATGTGTTCTATAATCTCTGTGTCAACAAGAAGATCGGATACACATGGGTTGCCGTGCACAATATGTTTATGACTGGCATGACCTATCTGTACGTGAACTTCTACTCCAAGAACAACATTAACGACTGCCAGGAGAAAGTCAGCGAA
A_tiles_P07272:670	NKKIGYTWVAVHNMFMTGMTYLYVNFYSKNNINDCQEKVSEYTEKVLIVLKNL	PPR1	P07272	670	0.0111407	0.75271	-0.880504	0.0109452	0.0107319	0.0117715	0.664288	0.895423	0.716966	0.0151615	1.35313	1.23401	0.0177624	0.0129414	1.39699	1.31065	AATAAGAAGATCGGCTATACATGGGTTGCCGTGCACAATATGTTTATGACTGGGATGACCTACCTGTACGTCAACTTCTACAGCAAGAACAACATTAACGACTGCCAGGAGAAAGTCTCCGAGTATACGGAAAAAGTGTTGATCGTGCTCAAGAATCTG
A_tiles_P07272:683	MFMTGMTYLYVNFYSKNNINDCQEKVSEYTEKVLIVLKNLIGFCESAKTCYTS	PPR1	P07272	683	0.0150074	1.01396	0.0429709	0.0171125	0.0119683	0.0165032	1.03859	0.998576	1.00516	0.0145898	1.30211	1.07718	0.0130723	0.0162835	1.02812	1.64912	ATGTTTATGACTGGCATGACGTATTTGTACGTGAACTTCTACAGTAAGAACAACATTAATGACTGCCAGGAGAAGGTGAGCGAGTATACCGAAAAAGTCCTGATCGTTCTCAAGAATCTGATCGGGTTCTGTGAGTCTGCCAAAACATGCTACACCTCC
A_tiles_P07272:696	YSKNNINDCQEKVSEYTEKVLIVLKNLIGFCESAKTCYTSYKILSSVVIKLKF	PPR1	P07272	696	0.0123063	0.831468	-0.57206	0.0124648	0.0101649	0.0147095	0.756518	0.84811	0.895912	0.012871	1.14872	0.565728	0.0146594	0.0113008	1.15295	1.1445	TACTCCAAGAACAACATCAATGACTGCCAGGAAAAAGTGAGCGAGTACACAGAGAAGGTGTTGATTGTTCTGAAGAACCTCATAGGCTTCTGTGAGTCTGCCAAAACTTGCTATACCAGCTACAAAATCCTGAGTTCCGTCGTGATCAAGCTGAAGTTT
A_tiles_P07272:709	SEYTEKVLIVLKNLIGFCESAKTCYTSYKILSSVVIKLKFMQINDAKGIFSDS	PPR1	P07272	709	0.0114249	0.771917	-0.802406	0.00928964	0.0112616	0.0142549	0.563807	0.939612	0.868224	0.013154	1.17397	0.654456	0.016259	0.010642	1.27875	1.07777	AGTGAGTATACAGAGAAGGTGTTGATTGTGCTGAAGAACCTGATAGGCTTCTGTGAATCAGCCAAAACCTGCTACACTAGCTACAAAATCCTCTCCAGCGTTGTCATCAAGCTGAAGTTCATGCAGATCAATGACGCTAAAGGGATTTTTTCCGATTCT
A_tiles_P07272:722	LIGFCESAKTCYTSYKILSSVVIKLKFMQINDAKGIFSDSNPLTSQANRMSSY	PPR1	P07272	722	0.0107657	0.727376	-0.986624	0.0103615	0.00938464	0.0128317	0.628862	0.78301	0.781544	0.0118821	1.06045	0.239494	0.0124712	0.0113208	0.980844	1.14652	CTGATTGGCTTCTGCGAGTCAGCTAAAACCTGTTACACTTCTTACAAGATCCTGAGCAGCGTCGTGATCAAGCTCAAGTTTATGCAGATCAACGATGCCAAAGGGATATTCAGTGACTCCAATCCCTTGACATCCCAGGCAAACCGCATGTCCAGCTAT
A_tiles_P07272:735	SYKILSSVVIKLKFMQINDAKGIFSDSNPLTSQANRMSSYDKKTNVLGFDDGT	PPR1	P07272	735	0.0112834	0.762353	-0.841047	0.0113091	0.00991268	0.0128144	0.686374	0.827067	0.78049	0.00898341	0.801751	-0.901599	0.00935712	0.00862462	0.735926	0.873464	TCCTACAAAATACTGTCCAGTGTCGTGATCAAGCTGAAGTTCATGCAGATCAACGACGCTAAAGGGATTTTTAGCGATAGCAACCCCTTGACCTCTCAGGCCAATAGAATGTCATCCTATGACAAGAAGACAAACGTGCTCGGATTCGACGATGGCACT
A_tiles_P07272:748	FMQINDAKGIFSDSNPLTSQANRMSSYDKKTNVLGFDDGTFDNKVFNRTNFEE	PPR1	P07272	748	0.0161939	1.09412	0.27882	0.0145872	0.0134936	0.0215749	0.88533	1.12584	1.31407	0.0079068	0.705666	-1.42249	0.00851295	0.00734381	0.669533	0.743749	TTCATGCAGATTAACGACGCCAAGGGGATCTTTTCAGATTCTAACCCTCTCACTTCCCAGGCTAATCGCATGAGCAGTTACGATAAGAAAACCAATGTGCTGGGCTTTGACGACGGAACATTCGACAATAAGGTCTTCAACCGGACCAACTTCGAAGAG
A_tiles_P07272:761	SNPLTSQANRMSSYDKKTNVLGFDDGTFDNKVFNRTNFEEKAPFDIPLDEFFT	PPR1	P07272	761	0.0467708	3.16003	3.56629	0.0429093	0.0392144	0.0608035	2.60425	3.27186	3.70337	0.0111915	0.998821	-0.00481558	0.0135334	0.00925488	1.06439	0.937294	AGTAATCCCCTGACCTCTCAGGCTAACAGGATGAGCTCCTACGACAAAAAGACTAATGTCCTGGGCTTCGATGATGGGACATTCGACAACAAGGTGTTTAACCGCACCAACTTTGAAGAGAAGGCCCCTTTTGACATCCCACTCGACGAGTTCTTCACG
A_tiles_P07272:77	FFLEDRLAVMMRVLKEYGVDPTKIRGNIPATSDDEPFDLKKYSSVSSLGEEGI	PPR1	P07272	77	0.0154569	1.04433	0.134459	0.0152025	0.0143671	0.0169077	0.922671	1.19873	1.0298	0.0122658	1.09469	0.36918	0.0133335	0.0112835	1.04867	1.14274	TTCTTTCTGGAGGACCGCCTGGCTGTCATGATGAGGGTGTTGAAGGAATACGGGGTTGACCCTACAAAAATCAGAGGAAACATTCCCGCCACCTCAGATGATGAACCATTCGACCTGAAGAAGTATTCCTCTGTGAGTAGCCTCGGCGAGGAGGGCATC
A_tiles_P07272:774	YDKKTNVLGFDDGTFDNKVFNRTNFEEKAPFDIPLDEFFTELEKHSNVSQFNT	PPR1	P07272	774	0.0800476	5.40835	5.23187	0.0931144	0.055412	0.0994087	5.65131	4.62331	6.0547	0.0128059	1.1429	0.545032	0.0151808	0.0108026	1.19395	1.09404	TACGACAAGAAGACCAACGTGCTGGGGTTCGATGACGGCACTTTTGACAATAAGGTGTTCAATCGCACCAACTTCGAGGAAAAAGCCCCCTTTGACATCCCTCTCGATGAATTTTTCACAGAGCTGGAGAAACACTCCAACGTCAGCCAGTTCAACACG
A_tiles_P07272:787	TFDNKVFNRTNFEEKAPFDIPLDEFFTELEKHSNVSQFNTLDVSEGNQVINES	PPR1	P07272	787	0.0593529	4.01013	4.30473	0.0568303	0.045091	0.0815936	3.44915	3.76218	4.96964	0.0101861	0.909091	-0.388907	0.0113258	0.00916113	0.89076	0.927799	ACCTTTGACAACAAGGTTTTCAATCGCACGAATTTCGAGGAGAAAGCCCCCTTTGATATTCCTCTCGACGAATTCTTCACAGAACTGGAGAAGCACAGTAACGTCTCTCAGTTTAACACTCTGGATGTGAGCGAAGGCAATCAGGTGATCAACGAGTCC
A_tiles_P07272:799	EEKAPFDIPLDEFFTELEKHSNVSQFNTLDVSEGNQVINESASTNTSSALNCQ	PPR1	P07272	799	0.0185128	1.25081	0.69364	0.0204716	0.0145983	0.0212307	1.24246	1.21802	1.2931								GAGGAGAAGGCTCCCTTCGACATTCCTCTGGATGAGTTCTTCACGGAACTCGAAAAACACTCTAACGTGTCCCAGTTTAACACTCTGGACGTCTCAGAAGGCAATCAAGTGATCAATGAGAGTGCATCCACAAACACCAGCAGCGCCTTGAACTGCCAG
A_tiles_P07272:812	FTELEKHSNVSQFNTLDVSEGNQVINESASTNTSSALNCQSYTNNQDIMDILF	PPR1	P07272	812										0.0113522	1.01317	0.0533697	0.0133536	0.00965081	1.05025	0.977392	TTCACTGAGCTGGAGAAGCACAGCAACGTGTCCCAGTTTAACACCCTCGATGTGTCCGAAGGCAATCAAGTCATCAATGAGTCTGCCTCCACCAATACATCAAGCGCTTTGAACTGCCAGAGTTACACGAACAACCAGGACATTATGGACATCCTGTTC
A_tiles_P07272:825	NTLDVSEGNQVINESASTNTSSALNCQSYTNNQDIMDILFQVTSGSVWDEFFV	PPR1	P07272	825	0.0617869	4.17458	4.4293	0.0771673	0.0480963	0.0635541	4.68345	4.01293	3.8709	0.0226037	2.01733	2.86355	0.0248714	0.0205427	1.95611	2.08047	AACACACTGGATGTGTCCGAGGGCAACCAGGTGATTAATGAATCAGCTAGCACCAATACTAGTTCCGCCCTGAATTGCCAGTCTTACACCAACAACCAAGACATCATGGACATCCTCTTTCAGGTTACGAGCGGGAGCGTCTGGGACGAGTTCTTCGTG
A_tiles_P07272:838	ESASTNTSSALNCQSYTNNQDIMDILFQVTSGSVWDEFFVRSGNGNEGESSYD	PPR1	P07272	838	0.104838	7.08332	6.06812	0.141693	0.0798761	0.101811	8.59967	6.66448	6.201	0.0222105	1.98224	2.79195	0.0242661	0.020329	1.9085	2.05884	GAGTCCGCCTCTACGAACACTTCCAGCGCTCTCAATTGCCAGAGCTATACAAACAACCAGGACATCATGGACATTCTGTTCCAAGTCACCAGCGGTTCTGTGTGGGATGAATTTTTCGTGAGATCAGGAAATGGGAACGAGGGCGAGAGTTCCTACGAC
A_tiles_P07272:851	QSYTNNQDIMDILFQVTSGSVWDEFFVRSGNGNEGESSYDISKGKNSESGGIF	PPR1	P07272	851	0.0746014	5.04038	5.01346	0.0950931	0.0559546	0.0780289	5.7714	4.66858	4.75252	0.0200111	1.78595	2.36645	0.0223876	0.0178869	1.76076	1.81151	CAGTCCTACACCAACAACCAGGACATTATGGACATCCTGTTCCAAGTGACAAGCGGGTCTGTGTGGGATGAATTCTTTGTCAGATCAGGAAATGGGAACGAGGGCGAGTCCTCCTATGACATAAGCAAAGGTAAGAATAGCGAGAGTGGCGGCATCTTC
A_tiles_P07272:90	LKEYGVDPTKIRGNIPATSDDEPFDLKKYSSVSSLGEEGILPHNGLLADYLVQ	PPR1	P07272	90	0.0267926	1.81022	1.83942	0.0279415	0.0200157	0.0343892	1.69583	1.67001	2.09455	0.00972138	0.867613	-0.579458	0.0111321	0.00848946	0.875522	0.859776	CTGAAGGAGTACGGCGTGGACCCTACCAAGATTAGAGGAAATATCCCAGCTACATCCGATGATGAGCCCTTCGACCTGAAGAAATATAGTAGCGTCTCTTCACTCGGTGAAGAGGGCATCCTGCCGCACAACGGGTTGCTCGCCGACTACCTGGTGCAG
A_tiles_P08153:0	MDTSNSWFDASKVQSLNFDLQTNSYYSNARGSDPSSYAIEGEYKTLATDDLGN	SWI5	P08153	0	0.0316887	2.14102	2.35964	0.031125	0.0263265	0.038834	1.88904	2.19656	2.36527	0.0104291	0.930773	-0.292728	0.0126275	0.00861335	0.99314	0.872323	ATGGACACCTCCAACTCCTGGTTTGATGCAAGCAAGGTGCAGAGCCTCAATTTCGACTTGCAGACTAACTCTTACTACAGTAATGCCAGAGGATCAGATCCCAGCTCCTATGCTATCGAAGGGGAGTACAAAACGCTGGCCACAGACGACCTGGGCAAC
A_tiles_P08153:103	FDLENNSREVTLNATSLLNENRLNQDSGMTVYQKTMSDKPHDEKKISMADNLL	SWI5	P08153	103	0.0126271	0.853141	-0.492301	0.0120287	0.0107356	0.0155908	0.730048	0.895724	0.949592	0.00821839	0.733475	-1.26478	0.00895887	0.00753912	0.704604	0.76353	TTCGACCTGGAGAACAACAGTCGCGAAGTGACGCTGAACGCTACTAGCCTCCTGAATGAGAATAGATTGAATCAGGACTCTGGCATGACCGTCTACCAGAAGACAATGTCCGATAAGCCCCACGATGAGAAAAAGATCTCAATGGCCGACAACCTGCTC
A_tiles_P08153:116	ATSLLNENRLNQDSGMTVYQKTMSDKPHDEKKISMADNLLSTINKSEINKGFD	SWI5	P08153	116	0.0116992	0.790448	-0.728877	0.0127027	0.00910918	0.0138386	0.770955	0.760027	0.842871	0.00865368	0.772324	-1.05418	0.00965057	0.00775977	0.759005	0.785876	GCTACGAGCCTCCTGAACGAAAATCGCCTGAATCAGGACTCTGGAATGACAGTGTACCAGAAGACTATGAGCGATAAACCCCACGACGAGAAGAAAATTTCCATGGCCGATAACTTGCTGAGTACCATCAACAAGTCCGAGATCAACAAGGGCTTCGAC
A_tiles_P08153:129	SGMTVYQKTMSDKPHDEKKISMADNLLSTINKSEINKGFDRNLGELLLQQQQE	SWI5	P08153	129	0.0147492	0.996521	-0.0108024	0.0123025	0.0142038	0.0183617	0.746664	1.1851	1.11836	0.00654055	0.583731	-2.19655	0.00685607	0.00623956	0.539221	0.631916	TCCGGGATGACTGTGTACCAGAAGACAATGTCAGATAAACCCCACGACGAAAAGAAGATTAGCATGGCCGACAACCTGTTGTCTACCATCAACAAGAGTGAGATCAACAAAGGCTTCGACAGAAATCTGGGAGAGCTGCTCCTCCAGCAACAGCAGGAG
A_tiles_P08153:13	QSLNFDLQTNSYYSNARGSDPSSYAIEGEYKTLATDDLGNILNLNYGETNEVI	SWI5	P08153	13	0.0356773	2.41051	2.7271	0.0327926	0.0300856	0.0460301	1.99025	2.5102	2.80356	0.0115412	1.03003	0.120725	0.0130754	0.010187	1.02837	1.03169	CAGAGCCTGAACTTCGACCTGCAGACTAACAGTTACTACTCTAATGCAAGAGGGTCCGATCCCAGCTCATATGCTATCGAAGGAGAGTATAAGACGTTGGCCACAGATGACCTGGGCAATATTCTCAACCTCAATTACGGCGAGACCAACGAGGTGATC
A_tiles_P08153:141	KPHDEKKISMADNLLSTINKSEINKGFDRNLGELLLQQQQELREQLRAQQEAN	SWI5	P08153	141	0.0161833	1.09341	0.276807	0.0165435	0.0127414	0.0201076	1.00406	1.06308	1.2247	0.00842931	0.752299	-1.16138	0.00940657	0.00755358	0.739815	0.764994	AAGCCCCACGACGAGAAAAAGATCTCTATGGCTGACAACTTGCTCAGCACCATCAACAAGTCCGAGATTAATAAAGGGTTCGATAGGAATCTGGGCGAACTGCTCCTGCAACAACAGCAGGAACTGCGCGAGCAGCTGCGGGCACAGCAGGAGGCCAAC
A_tiles_P08153:154	LLSTINKSEINKGFDRNLGELLLQQQQELREQLRAQQEANKKLELELKQTQYK	SWI5	P08153	154	0.0144636	0.977219	-0.0714266	0.0166129	0.013666	0.0133273	1.00827	1.14022	0.811727	0.00875797	0.781631	-1.00531	0.0103387	0.00741891	0.813128	0.751355	CTGCTGTCCACCATCAACAAGAGCGAGATTAACAAGGGCTTCGACAGAAATCTGGGAGAGTTGCTGCTCCAGCAACAGCAAGAACTGAGGGAACAGCTCCGCGCCCAGCAGGAAGCTAACAAAAAATTGGAGCTGGAGCTCAAGCAGACACAGTACAAG
A_tiles_P08153:167	FDRNLGELLLQQQQELREQLRAQQEANKKLELELKQTQYKQQQLQATLENSDG	SWI5	P08153	167	0.0135787	0.917434	-0.267102	0.0133989	0.0113006	0.016535	0.813204	0.942869	1.0071	0.0098877	0.882458	-0.510235	0.0102155	0.00957039	0.803439	0.969248	TTCGATCGCAACCTGGGCGAGTTGCTCCTGCAGCAGCAACAGGAGCTGAGAGAACAGTTGAGGGCCCAACAGGAAGCTAATAAAAAGCTGGAGCTGGAACTGAAGCAGACCCAGTACAAGCAACAGCAGCTCCAGGCAACACTCGAGAACTCCGACGGG
A_tiles_P08153:180	QELREQLRAQQEANKKLELELKQTQYKQQQLQATLENSDGPQFLSPKRKISPA	SWI5	P08153	180	0.00884137	0.59736	-1.597	0.00744728	0.00752344	0.0123351	0.451991	0.62772	0.751298	0.00959781	0.856585	-0.631657	0.0120316	0.00765631	0.946273	0.775398	CAGGAGCTGCGCGAGCAGCTGCGGGCCCAGCAGGAGGCCAATAAGAAGCTGGAACTGGAGCTCAAACAGACCCAGTACAAACAGCAGCAATTGCAAGCTACTCTGGAAAACTCTGACGGCCCTCAGTTCCTCAGCCCCAAGAGGAAGATCTCCCCAGCA
A_tiles_P08153:193	NKKLELELKQTQYKQQQLQATLENSDGPQFLSPKRKISPASENVEDVYANSLS	SWI5	P08153	193	0.00885953	0.598587	-1.59064	0.01002	0.00702373	0.00988094	0.608132	0.586026	0.60182	0.00899031	0.802367	-0.898467	0.0118235	0.00683599	0.929907	0.69232	AACAAGAAACTGGAGCTGGAGCTCAAGCAGACCCAGTACAAGCAGCAACAACTGCAGGCTACATTGGAAAATAGTGATGGCCCTCAGTTCCTCAGCCCAAAACGCAAGATCTCACCCGCATCTGAAAACGTGGAGGACGTCTATGCCAACAGCCTGTCC
A_tiles_P08153:206	KQQQLQATLENSDGPQFLSPKRKISPASENVEDVYANSLSPMISPPMSNTSFT	SWI5	P08153	206	0.0107147	0.723928	-1.00135	0.00984905	0.00994978	0.0125524	0.597759	0.830162	0.764534	0.00947305	0.84545	-0.685046	0.010914	0.00822231	0.858375	0.83272	AAGCAGCAACAGCTGCAGGCTACTTTGGAGAACTCAGACGGCCCACAGTTTCTGTCCCCTAAAAGAAAGATTAGCCCGGCATCTGAAAACGTCGAGGATGTGTACGCCAATTCCCTCAGTCCCATGATCAGCCCTCCCATGAGCAACACCTCCTTCACA
A_tiles_P08153:219	GPQFLSPKRKISPASENVEDVYANSLSPMISPPMSNTSFTGSPSRRNNRQKYC	SWI5	P08153	219	0.0127325	0.860261	-0.466541	0.0111933	0.0110385	0.0167061	0.679342	0.921	1.01752	0.0097245	0.867893	-0.578146	0.00922236	0.010254	0.725327	1.03848	GGGCCCCAGTTCCTGTCCCCTAAGCGGAAAATTTCACCCGCTAGCGAGAATGTGGAAGACGTCTATGCCAACTCTCTCAGTCCAATGATCTCTCCTCCCATGAGCAATACCTCCTTTACAGGCTCCCCGAGCCGCAGAAACAACAGGCAGAAGTACTGC
A_tiles_P08153:232	ASENVEDVYANSLSPMISPPMSNTSFTGSPSRRNNRQKYCLQRKNSSGTVGPL	SWI5	P08153	232	0.0128393	0.867479	-0.440644	0.0147019	0.00902558	0.0159507	0.892287	0.753052	0.971512	0.00991877	0.88523	-0.497436	0.0108581	0.00906072	0.853973	0.917631	GCCTCCGAGAACGTCGAAGACGTGTACGCTAACTCTCTCTCCCCAATGATCTCCCCTCCGATGTCTAATACTAGCTTCACAGGGTCACCCAGCAGACGCAATAACCGGCAGAAATATTGCCTGCAGAGGAAGAACAGTAGCGGCACCGTGGGACCCCTG
A_tiles_P08153:244	LSPMISPPMSNTSFTGSPSRRNNRQKYCLQRKNSSGTVGPLCFQELNEGFNDS	SWI5	P08153	244	0.0183477	1.23965	0.665864	0.0178051	0.0175962	0.0197142	1.08063	1.46814	1.20074	0.0139277	1.24302	0.887678	0.0141882	0.013672	1.11589	1.38464	CTCTCCCCAATGATCAGCCCCCCTATGAGTAACACCTCCTTCACAGGAAGCCCCTCACGCCGGAATAATAGACAGAAATACTGTCTGCAAAGGAAGAACTCCTCTGGGACTGTGGGTCCGCTGTGCTTTCAGGAATTGAACGAGGGCTTCAACGACAGC
A_tiles_P08153:257	FTGSPSRRNNRQKYCLQRKNSSGTVGPLCFQELNEGFNDSLISPKKIRSNPNE	SWI5	P08153	257	0.0137216	0.927086	-0.234663	0.0153465	0.0107736	0.0156258	0.93141	0.898896	0.951722	0.0110121	0.982809	-0.0707554	0.0108461	0.0111806	0.853034	1.13233	TTCACCGGATCACCTTCCAGGCGCAACAATCGGCAGAAATACTGTCTCCAACGCAAAAATTCTTCCGGCACAGTGGGTCCATTGTGCTTTCAGGAACTGAATGAGGGGTTCAACGACAGTCTGATTAGCCCGAAGAAGATCAGAAGCAACCCCAACGAG
A_tiles_P08153:26	SNARGSDPSSYAIEGEYKTLATDDLGNILNLNYGETNEVIMNEINDLNLPLGP	SWI5	P08153	26	0.0331181	2.2376	2.49638	0.0315943	0.0278644	0.0412606	1.91753	2.32488	2.51307	0.0104362	0.931409	-0.289944	0.0118235	0.00921162	0.929907	0.932913	AGTAACGCACGCGGTTCCGACCCAAGCTCTTATGCCATTGAAGGAGAGTACAAGACTTTGGCTACAGACGATCTCGGGAATATCCTGAATCTCAACTACGGCGAAACCAATGAGGTGATCATGAACGAGATAAACGACCTGAACCTGCCCCTGGGCCCT
A_tiles_P08153:270	YCLQRKNSSGTVGPLCFQELNEGFNDSLISPKKIRSNPNENLSSKTKFITPFT	SWI5	P08153	270	0.0180971	1.22272	0.623238	0.017792	0.015429	0.0215905	1.07983	1.28732	1.31502	0.00998589	0.891221	-0.469915	0.00973336	0.010245	0.765517	1.03757	TACTGCCTGCAGAGGAAAAATTCATCTGGCACTGTGGGGCCTCTCTGTTTTCAGGAACTGAACGAGGGATTCAACGACAGCTTGATCAGTCCAAAGAAAATTCGCTCCAATCCCAACGAGAACCTGTCCAGCAAGACAAAGTTCATCACCCCGTTCACG
A_tiles_P08153:283	PLCFQELNEGFNDSLISPKKIRSNPNENLSSKTKFITPFTPKSRVSSATSNSA	SWI5	P08153	283	0.012644	0.854281	-0.488163	0.0130991	0.0102398	0.0150702	0.795009	0.854364	0.917884	0.0122374	1.09216	0.359723	0.0129651	0.0115505	1.01969	1.16978	CCCCTGTGCTTCCAGGAGTTGAATGAAGGCTTCAACGACTCCCTCATCAGCCCTAAAAAGATTCGCTCTAACCCAAATGAGAACCTGTCCAGCAAGACCAAGTTCATCACACCGTTTACTCCCAAATCTAGAGTGTCCAGTGCTACGAGCAACTCAGCC
A_tiles_P08153:296	SLISPKKIRSNPNENLSSKTKFITPFTPKSRVSSATSNSANITPNNLRLDFKI	SWI5	P08153	296	0.0137778	0.930885	-0.221989	0.0147142	0.0110287	0.0161167	0.893038	0.92018	0.981623	0.0109414	0.976498	-0.0970419	0.0113506	0.010547	0.89271	1.06815	TCCCTGATCTCCCCAAAGAAAATACGGAGCAATCCCAACGAGAACCTCAGCTCTAAGACCAAGTTCATCACGCCTTTTACACCGAAAAGTAGGGTGTCATCTGCTACCTCCAATAGCGCCAATATTACTCCCAACAACTTGCGCCTGGACTTCAAGATC
A_tiles_P08153:309	ENLSSKTKFITPFTPKSRVSSATSNSANITPNNLRLDFKINVEDQESEYSEKP	SWI5	P08153	309	0.0121397	0.820213	-0.614304	0.0111635	0.0113717	0.014093	0.677537	0.948798	0.858367	0.00991499	0.884893	-0.498989	0.011854	0.00829316	0.932301	0.839896	GAGAACCTCTCCAGTAAGACCAAATTCATCACGCCGTTTACTCCAAAAAGCCGCGTCAGCTCTGCTACCTCCAATTCAGCCAATATTACACCCAACAACCTGAGACTGGACTTCAAGATCAACGTGGAAGATCAGGAAAGCGAGTACTCCGAGAAGCCT
A_tiles_P08153:322	TPKSRVSSATSNSANITPNNLRLDFKINVEDQESEYSEKPLGLGIELLGKPGP	SWI5	P08153	322	0.0139686	0.943777	-0.179356	0.014779	0.00895807	0.0205873	0.896966	0.747419	1.25392	0.0084866	0.757412	-1.13374	0.0101595	0.00708918	0.799031	0.717961	ACCCCAAAGAGCCGGGTCAGTTCTGCTACTAGCAACTCCGCCAACATTACACCCAATAATTTGCGCCTGGACTTCAAGATCAACGTGGAGGATCAGGAATCCGAATACTCAGAGAAACCTCTGGGACTGGGTATCGAGCTCCTCGGGAAGCCGGGCCCC
A_tiles_P08153:334	SANITPNNLRLDFKINVEDQESEYSEKPLGLGIELLGKPGPSPTKSVSLKSAS	SWI5	P08153	334	0.0109814	0.74195	-0.925134	0.0121385	0.0096349	0.011323	0.736708	0.80389	0.689653	0.00880215	0.785574	-0.984773	0.00982263	0.00788768	0.772538	0.79883	TCCGCTAACATCACCCCGAACAACTTGCGCCTGGACTTCAAGATCAATGTCGAGGATCAGGAATCCGAGTACAGCGAGAAACCACTGGGACTCGGTATTGAACTCCTGGGCAAACCTGGGCCCTCACCCACAAAGTCTGTGAGCCTGAAGAGTGCCTCC
A_tiles_P08153:347	KINVEDQESEYSEKPLGLGIELLGKPGPSPTKSVSLKSASVDIMPTIPGSVNN	SWI5	P08153	347	0.00875821	0.591742	-1.62629	0.00584079	0.00904747	0.012713	0.35449	0.754878	0.774311	0.006371	0.568599	-2.30373	0.00805007	0.00504215	0.633128	0.510647	AAGATAAATGTGGAGGACCAGGAGTCCGAGTACTCTGAAAAGCCCCTCGGATTGGGGATTGAACTGCTGGGTAAACCAGGCCCTAGCCCTACCAAATCAGTTAGCCTGAAGAGTGCCAGCGTGGATATCATGCCGACAATCCCCGGCTCCGTCAACAAC
A_tiles_P08153:360	KPLGLGIELLGKPGPSPTKSVSLKSASVDIMPTIPGSVNNTPSVNKVSLSSSY	SWI5	P08153	360	0.00589811	0.398501	-2.85172	0.00577167	0.00505327	0.00703501	0.350295	0.421621	0.428483								AAGCCGCTGGGCCTCGGGATCGAGTTGCTGGGCAAGCCCGGTCCCAGCCCTACTAAATCTGTTAGTCTCAAATCAGCCAGCGTGGACATCATGCCTACCATTCCAGGATCTGTGAATAACACACCCTCCGTGAACAAGGTCAGCCTGAGTTCCTCCTAC
A_tiles_P08153:373	GPSPTKSVSLKSASVDIMPTIPGSVNNTPSVNKVSLSSSYIDQYTPRGKQLHF	SWI5	P08153	373	0.00956044	0.645943	-1.35464	0.00971189	0.00767834	0.0117182	0.589435	0.640645	0.713724	0.00958495	0.855437	-0.637129	0.0115983	0.00792107	0.912194	0.802212	GGCCCATCCCCTACCAAGAGCGTGTCTCTCAAGTCAGCCTCTGTCGACATCATGCCCACGATTCCTGGGAGCGTTAATAACACTCCCAGTGTGAACAAAGTGAGTCTGTCCTCCAGCTATATCGATCAGTACACACCGCGGGGAAAGCAGCTGCACTTC
A_tiles_P08153:386	SVDIMPTIPGSVNNTPSVNKVSLSSSYIDQYTPRGKQLHFSSISENALGINAA	SWI5	P08153	386	0.0117531	0.794091	-0.714623	0.0109924	0.00923174	0.0159987	0.667153	0.770252	0.974434	0.00863515	0.77067	-1.06293	0.00882251	0.00845177	0.693879	0.855959	TCCGTGGACATCATGCCGACCATACCCGGATCCGTTAACAATACACCATCTGTCAACAAGGTGTCTCTGAGCAGCTCCTACATTGATCAGTATACTCCTAGAGGGAAACAGCTGCACTTCAGTTCAATCAGCGAGAATGCACTCGGCATCAACGCCGCT
A_tiles_P08153:39	EGEYKTLATDDLGNILNLNYGETNEVIMNEINDLNLPLGPLSDEKSVKVSTFS	SWI5	P08153	39	0.0263081	1.77749	1.78287	0.0247825	0.0212912	0.0345085	1.5041	1.77644	2.10181	0.00981697	0.876145	-0.539531	0.0106949	0.00901108	0.841143	0.912603	GAAGGGGAGTATAAGACGCTGGCCACTGACGATCTGGGAAATATCCTCAATCTGAACTACGGCGAGACAAACGAGGTGATCATGAACGAGATTAACGATTTGAATCTGCCCCTCGGTCCTCTGAGCGACGAAAAATCCGTCAAGGTGAGTACCTTCTCT
A_tiles_P08153:399	NTPSVNKVSLSSSYIDQYTPRGKQLHFSSISENALGINAATPHLKPPSQQARH	SWI5	P08153	399	0.0163905	1.10741	0.316228	0.0166737	0.0151598	0.01742	1.01196	1.26486	1.06101	0.00655649	0.585154	-2.18662	0.0074675	0.00575662	0.587309	0.583006	AACACACCCTCCGTGAACAAGGTCAGCCTGTCCTCATCCTATATCGACCAATACACTCCTAGAGGCAAACAGCTCCACTTCAGTTCTATTAGCGAGAACGCTCTGGGAATCAATGCCGCAACCCCACATTTGAAGCCGCCCAGCCAGCAGGCCCGCCAC
A_tiles_P08153:412	YIDQYTPRGKQLHFSSISENALGINAATPHLKPPSQQARHREGVFNDLDPNVL	SWI5	P08153	412	0.0136782	0.924157	-0.244471	0.0144653	0.0108594	0.0162913	0.877929	0.906055	0.992256	0.010915	0.974141	-0.106905	0.0125142	0.00952014	0.984226	0.964159	TACATCGACCAGTATACACCCAGAGGGAAGCAGCTGCACTTCAGCTCTATCTCCGAAAATGCTCTGGGCATTAACGCCGCAACCCCTCATTTGAAACCACCCAGTCAGCAAGCCCGCCACAGGGAGGGAGTCTTTAACGATCTCGACCCGAACGTGCTG
A_tiles_P08153:424	HFSSISENALGINAATPHLKPPSQQARHREGVFNDLDPNVLTKNTDNEGDDNE	SWI5	P08153	424	0.0113589	0.767456	-0.820369	0.0100042	0.0116614	0.0125625	0.607177	0.972971	0.765148	0.00825487	0.736731	-1.24671	0.0101067	0.00674235	0.794879	0.682836	CACTTCTCCTCTATTAGCGAGAATGCCCTCGGGATCAATGCCGCAACACCACATTTGAAACCCCCTAGTCAGCAGGCTAGACACCGCGAAGGAGTGTTTAATGATCTGGATCCGAACGTCCTGACCAAGAACACTGACAACGAGGGCGACGACAACGAG
A_tiles_P08153:437	AATPHLKPPSQQARHREGVFNDLDPNVLTKNTDNEGDDNEENEPESRFVISET	SWI5	P08153	437	0.00666672	0.474409	-2.31129	0.00784814	0.00566315		0.47632	0.472506		0.00724445	0.646552	-1.77948	0.0118998	0.00441032	0.935906	0.446658	GCCGCAACACCCCACCTCAAGCCGCCTTCTCAGCAGGCTCGGCATAGAGAAGGAGTGTTTAACGATCTGGACCCCAACGTCCTGACCAAAAATACGGACAATGAAGGCGATGACAACGAAGAGAACGAGCCAGAGAGCCGCTTCGTGATCTCCGAGACT
A_tiles_P08153:450	RHREGVFNDLDPNVLTKNTDNEGDDNEENEPESRFVISETPSPVLKSQSKYEG	SWI5	P08153	450	0.00966962	0.65332	-1.31944	0.00948102	0.0085369	0.0111705	0.575423	0.712279	0.680363	0.010071	0.898815	-0.435292	0.0111939	0.00906072	0.880385	0.917631	AGGCACCGGGAGGGAGTGTTCAACGACCTGGATCCAAACGTTCTCACCAAGAACACTGATAACGAGGGCGACGACAATGAAGAGAATGAACCTGAATCACGCTTTGTGATCTCCGAGACACCCTCTCCGGTCCTGAAAAGCCAGAGTAAGTACGAGGGG
A_tiles_P08153:463	VLTKNTDNEGDDNEENEPESRFVISETPSPVLKSQSKYEGRSPQFGTHIKEIN	SWI5	P08153	463	0.00928682	0.627457	-1.44464	0.00945261	0.00765589	0.0110676	0.573699	0.638771	0.674097	0.00992969	0.886205	-0.492945	0.0120352	0.00819255	0.946551	0.829706	GTGCTCACCAAGAACACGGACAACGAGGGCGATGACAATGAGGAAAATGAACCAGAGTCCAGATTTGTGATTAGCGAGACACCTAGTCCCGTCCTGAAATCTCAGTCCAAATACGAAGGACGCAGCCCGCAGTTCGGGACTCACATCAAGGAGATCAAC
A_tiles_P08153:476	EENEPESRFVISETPSPVLKSQSKYEGRSPQFGTHIKEINTYTTNSPSKITRK	SWI5	P08153	476	0.0122123	0.825113	-0.595843	0.0112204	0.0110776	0.0146533	0.680991	0.924259	0.892493	0.00859998	0.767531	-1.07959	0.00897198	0.0082434	0.705635	0.834856	GAGGAGAACGAGCCTGAATCCCGGTTCGTCATATCAGAAACTCCCAGCCCAGTGCTGAAATCTCAGTCCAAGTATGAAGGGAGGAGTCCCCAGTTTGGCACCCACATCAAAGAGATTAATACATACACGACCAACTCCCCGAGCAAGATCACCCGCAAG
A_tiles_P08153:489	TPSPVLKSQSKYEGRSPQFGTHIKEINTYTTNSPSKITRKLTTLPRGSIDKYV	SWI5	P08153	489	0.0136781	0.92415	-0.244495	0.019166	0.012447	0.0107271	1.16322	1.03852	0.653356	0.00997385	0.890146	-0.474838	0.00945883	0.0105169	0.743925	1.06511	ACTCCCTCCCCGGTGCTGAAGTCCCAGAGTAAATATGAAGGCAGGTCTCCACAGTTCGGAACTCACATCAAGGAGATTAACACATACACCACCAATTCACCCAGCAAGATAACCCGGAAACTGACAACGCTCCCTCGCGGGAGCATCGACAAGTACGTC
A_tiles_P08153:502	GRSPQFGTHIKEINTYTTNSPSKITRKLTTLPRGSIDKYVKEMPDKTFECLFP	SWI5	P08153	502	0.0208593	1.40934	1.06353	0.0268462	0.0180805	0.0186986	1.62935	1.50855	1.13888	0.0117637	1.04989	0.198661	0.013185	0.0104957	1.03699	1.06296	GGCCGGTCCCCGCAGTTTGGAACTCACATCAAGGAGATCAACACCTACACAACGAATTCTCCCAGTAAGATTACCCGCAAACTGACCACACTCCCTAGAGGGAGCATAGATAAATATGTGAAGGAGATGCCAGACAAGACTTTCGAATGCCTGTTCCCC
A_tiles_P08153:51	GNILNLNYGETNEVIMNEINDLNLPLGPLSDEKSVKVSTFSELIGNDWQSMNF	SWI5	P08153	51	0.0431449	2.91505	3.31617	0.0486282	0.0323285	0.0510874	2.95135	2.69734	3.11159	0.0108322	0.966754	-0.137965	0.0127564	0.00919828	1.00328	0.931562	GGCAACATACTGAACCTGAACTACGGCGAGACCAACGAGGTGATCATGAACGAAATTAATGACCTGAATCTGCCTCTCGGACCCTTGAGCGATGAAAAGTCTGTCAAAGTGTCCACATTTTCAGAGCTCATCGGGAATGACTGGCAGAGTATGAACTTC
A_tiles_P08153:515	NTYTTNSPSKITRKLTTLPRGSIDKYVKEMPDKTFECLFPGCTKTFKRRYNIR	SWI5	P08153	515	0.030366	2.05165	2.22748	0.0374615	0.0257058	0.0290768	2.27361	2.14477	1.77098	0.0194351	1.73455	2.24728	0.0185828	0.0203265	1.46152	2.05858	AACACCTACACTACCAATAGCCCATCTAAAATTACCCGCAAGCTCACAACTCTGCCTCGGGGATCCATCGATAAATATGTGAAGGAGATGCCCGACAAAACCTTCGAATGCCTGTTTCCGGGCTGTACAAAGACGTTCAAGAGAAGGTACAACATCCGC
A_tiles_P08153:527	RKLTTLPRGSIDKYVKEMPDKTFECLFPGCTKTFKRRYNIRSHIQTHLEDRPY	SWI5	P08153	527	0.0179846	1.21512	0.603919	0.0127733	0.0187693	0.0242636	0.775235	1.56602	1.47783	0.0138	1.23162	0.850076	0.0161056	0.0118244	1.26668	1.19753	CGGAAGTTGACCACCCTGCCCCGGGGATCCATTGACAAGTACGTGAAAGAAATGCCAGATAAGACCTTCGAGTGCCTGTTTCCTGGCTGTACAAAGACTTTCAAACGCCGCTATAACATCAGAAGCCACATCCAGACGCATCTCGAGGACAGGCCGTAC
A_tiles_P08153:540	YVKEMPDKTFECLFPGCTKTFKRRYNIRSHIQTHLEDRPYSCDHPGCDKAFVR	SWI5	P08153	540	0.0324265	2.19087	2.43097	0.0404961	0.0271424	0.0310197	2.4578	2.26463	1.88932	0.00962204	0.858748	-0.621369	0.0131203	0.00705651	1.0319	0.714653	TACGTGAAGGAGATGCCGGACAAAACGTTCGAGTGTCTGTTTCCCGGGTGTACTAAGACCTTCAAAAGGAGATACAACATCCGCTCCCACATTCAGACACATCTCGAAGATCGCCCTTATAGCTGCGATCACCCAGGCTGCGACAAGGCCTTCGTCCGG
A_tiles_P08153:553	FPGCTKTFKRRYNIRSHIQTHLEDRPYSCDHPGCDKAFVRNHDLIRHKKSHQE	SWI5	P08153	553	0.0148191	1.00124	0.00384119	0.0147608	0.0141058	0.0156299	0.895866	1.17692	0.951975	0.0138005	1.23167	0.850231	0.0150569	0.0126489	1.18421	1.28103	TTCCCTGGGTGCACCAAGACATTTAAGAGGCGGTACAATATCAGATCCCACATTCAGACTCACCTGGAAGACCGGCCATATTCTTGCGACCATCCCGGCTGTGATAAAGCCTTCGTGCGCAACCATGACCTCATCCGCCACAAAAAGAGCCACCAGGAG
A_tiles_P08153:566	IRSHIQTHLEDRPYSCDHPGCDKAFVRNHDLIRHKKSHQEKAYACPCGKKFNR	SWI5	P08153	566	0.0345293			0.0350583	0.0374162	0.0313845	2.12776	3.12183	1.91154	0.010221	0.912202	-0.374965	0.012837	0.00813809	1.00961	0.82419	ATCCGCTCTCACATCCAGACCCACCTCGAAGACCGCCCCTATAGCTGCGATCATCCTGGGTGTGACAAGGCTTTTGTGAGAAATCACGACCTGATTAGGCATAAGAAATCCCACCAGGAGAAAGCCTACGCATGTCCATGCGGCAAGAAGTTCAACCGG
A_tiles_P08153:579	YSCDHPGCDKAFVRNHDLIRHKKSHQEKAYACPCGKKFNREDALVVHRSRMIC	SWI5	P08153	579	0.0165691	1.11948	0.34982	0.0149285	0.0166148	0.0183393	0.906041	1.38626	1.117	0.0128415	1.14608	0.556348	0.0160655	0.0102645	1.26353	1.03954	TACTCCTGCGACCACCCTGGCTGCGACAAGGCTTTTGTCCGGAACCATGATCTGATTCGCCATAAGAAGTCTCACCAGGAAAAAGCCTATGCCTGTCCCTGTGGAAAAAAGTTCAATCGCGAGGACGCACTCGTGGTGCACAGAAGCAGGATGATCTGC
A_tiles_P08153:592	RNHDLIRHKKSHQEKAYACPCGKKFNREDALVVHRSRMICSGGKKYENVVIKR	SWI5	P08153	592	0.0258061	1.74357	1.72314	0.0258197	0.0234271	0.0284116	1.56705	1.95465	1.73047	0.0137754	1.22943	0.842809	0.0156146	0.0121529	1.22807	1.23079	CGCAACCACGACCTGATCAGGCACAAGAAGTCCCACCAGGAGAAGGCATATGCTTGTCCCTGCGGAAAAAAATTCAATCGGGAAGATGCCCTCGTCGTTCATAGATCTCGCATGATTTGCAGCGGCGGGAAAAAGTACGAGAACGTGGTGATCAAGCGG
A_tiles_P08153:605	EKAYACPCGKKFNREDALVVHRSRMICSGGKKYENVVIKRSPRKRGRPRKDGT	SWI5	P08153	605	0.022041	1.48918	1.23432	0.0193276	0.0213501	0.0259486	1.17303	1.78135	1.58046	0.0145159	1.29552	1.05647	0.0156071	0.0135011	1.22748	1.36733	GAGAAGGCTTACGCCTGCCCTTGCGGTAAGAAATTCAATCGGGAAGATGCACTGGTGGTTCACCGGAGCAGAATGATTTGTTCCGGAGGCAAGAAATATGAGAACGTCGTGATCAAGAGATCTCCACGCAAACGCGGGAGGCCCAGGAAGGACGGCACC
A_tiles_P08153:617	NREDALVVHRSRMICSGGKKYENVVIKRSPRKRGRPRKDGTSSVSSSPIKENI	SWI5	P08153	617	0.0176664	1.19362	0.548588	0.0192899	0.0156878	0.0182203	1.17074	1.30891	1.10975	0.0164123	1.46477	1.55749	0.0168375	0.0159979	1.32425	1.6202	AACAGGGAGGACGCCCTGGTGGTCCACCGGAGTCGCATGATATGCAGCGGAGGGAAGAAGTACGAAAATGTGGTTATCAAGCGGTCTCCCAGGAAAAGAGGCAGACCACGCAAAGATGGTACCTCATCCGTGTCCTCCAGCCCTATTAAGGAGAACATC
A_tiles_P08153:630	ICSGGKKYENVVIKRSPRKRGRPRKDGTSSVSSSPIKENINKDHNGQLMFKLE	SWI5	P08153	630	0.0182149	1.23067	0.643348	0.0182722	0.0168303	0.0196515	1.10898	1.40424	1.19692	0.0144549	1.29007	1.03928	0.0146182	0.0142934	1.1497	1.44758	ATATGCTCCGGCGGCAAGAAGTACGAGAACGTGGTGATTAAAAGAAGCCCAAGGAAACGCGGTCGGCCCCGCAAAGATGGAACCAGCAGTGTCTCTTCATCCCCTATCAAGGAAAACATCAACAAGGACCACAATGGGCAGCTCATGTTCAAGCTGGAG
A_tiles_P08153:64	VIMNEINDLNLPLGPLSDEKSVKVSTFSELIGNDWQSMNFDLENNSREVTLNA	SWI5	P08153	64	0.0357623	2.41625	2.73447	0.0335908	0.0263858	0.0516041	2.0387	2.20151	3.14306	0.00926036	0.826469	-0.777702	0.0111082	0.00771989	0.873649	0.781837	GTCATCATGAACGAGATTAACGACTTGAATCTGCCCCTGGGCCCTCTCAGTGATGAAAAGTCTGTGAAAGTTAGCACATTCTCCGAGCTGATCGGGAATGACTGGCAGTCAATGAATTTTGACCTCGAAAACAACTCCCGCGAGGTGACCCTGAACGCC
A_tiles_P08153:643	KRSPRKRGRPRKDGTSSVSSSPIKENINKDHNGQLMFKLEDQLRRERSYDGNG	SWI5	P08153	643	0.0128517	0.868317	-0.437651	0.0126768	0.0111464	0.0150224	0.769383	0.930001	0.914973	0.0171575	1.53127	1.73866	0.019498	0.0150979	1.53349	1.52905	AAGCGCTCCCCTAGGAAGCGGGGCCGGCCAAGGAAAGATGGAACCAGCTCAGTGTCTTCCAGTCCCATCAAGGAGAACATTAACAAAGACCACAATGGGCAGCTCATGTTCAAGCTGGAAGACCAGCTGAGACGCGAGAGAAGCTACGACGGTAACGGC
A_tiles_P08153:656	GTSSVSSSPIKENINKDHNGQLMFKLEDQLRRERSYDGNGTGIMVSPMKTNQR	SWI5	P08153	656	0.0109824	0.742019	-0.924845	0.0106409	0.0107497	0.0115804	0.645816	0.896903	0.705327	0.00813941	0.726426	-1.30418	0.00884336	0.0074915	0.695519	0.758706	GGCACTTCCAGTGTCAGCTCCTCTCCTATCAAGGAGAACATTAACAAGGACCACAATGGCCAGCTGATGTTCAAACTCGAGGACCAACTGAGGCGGGAAAGAAGCTACGATGGAAATGGTACAGGGATCATGGTGTCACCCATGAAGACCAACCAGCGC
A_tiles_P08153:77	GPLSDEKSVKVSTFSELIGNDWQSMNFDLENNSREVTLNATSLLNENRLNQDS	SWI5	P08153	77	0.0237407	1.60402	1.46457	0.0231972	0.0190405	0.0302945	1.40789	1.58865	1.84515	0.00781638	0.697596	-1.46942	0.00920196	0.00663943	0.723723	0.672413	GGCCCTCTGTCCGACGAGAAGAGCGTCAAAGTGTCCACCTTTTCTGAACTCATCGGAAATGACTGGCAGTCCATGAACTTCGATCTGGAGAACAATAGTCGCGAAGTGACATTGAATGCCACTTCACTGCTCAACGAGAACAGGCTGAACCAGGACAGC
A_tiles_P08153:90	FSELIGNDWQSMNFDLENNSREVTLNATSLLNENRLNQDSGMTVYQKTMSDKP	SWI5	P08153	90	0.0209235	1.41368	1.07305	0.022539	0.0155995	0.026053	1.36794	1.30155	1.58681	0.009177	0.819029	-0.814599	0.0114261	0.00737059	0.898652	0.746461	TTCAGCGAGCTGATCGGGAACGACTGGCAATCCATGAACTTTGACCTCGAGAACAATTCTCGCGAAGTGACACTCAACGCCACTTCCCTGTTGAATGAGAATAGACTGAACCAGGATAGTGGCATGACGGTCTACCAGAAAACCATGAGCGACAAGCCC
A_tiles_P08638:0	MEGRSDFVATSQSGSEMSHSETRNRTGMNARKRKFACVECRQQKSKCDAHERA	LEU3	P08638	0	0.0108443	0.73269	-0.964061	0.0112439	0.00965509	0.0117472	0.682418	0.805575	0.71549	0.0153322	1.36837	1.2797	0.0144	0.0163248	1.13254	1.6533	ATGGAGGGCCGCTCCGATTTCGTCGCCACCTCACAAAGTGGAAGCGAAATGTCCCATTCTGAGACTAGGAACAGAACAGGGATGAATGCTCGGAAACGCAAATTTGCATGTGTGGAATGCAGGCAGCAGAAGAGCAAGTGCGACGCCCACGAGCGGGCG
A_tiles_P08638:103	ILKKIEEEQEIVLDNSNFTKEKVKQLRKSAFETTEIEPRSYKTLRGEPISYST	LEU3	P08638	103	0.0141617	0.956827	-0.136792	0.012798	0.0132783	0.0167135	0.776735	1.10788	1.01797	0.00759978	0.678266	-1.58409	0.00713376	0.00809626	0.561061	0.819954	ATCCTGAAGAAGATCGAGGAAGAGCAGGAGATTGTCTTGGACAACAGCAATTTCACAAAGGAGAAAGTGAAGCAGCTGCGGAAATCTGCCTTTGAAACCACTGAAATAGAGCCTAGGTCCTATAAAACGCTCCGCGGCGAGCCCATCAGTTACTCAACC
A_tiles_P08638:115	LDNSNFTKEKVKQLRKSAFETTEIEPRSYKTLRGEPISYSTNRRHTDSSPLTL	LEU3	P08638	115	0.0152027	1.02716	0.0830607	0.0139718	0.0129934	0.0193549	0.847976	1.08411	1.17885	0.0114157	1.01883	0.0761282	0.0128908	0.0101095	1.01385	1.02384	CTGGACAACTCAAACTTCACCAAGGAGAAGGTGAAGCAGCTCCGGAAAAGCGCCTTTGAGACTACCGAGATTGAACCTAGATCTTACAAAACACTGCGCGGCGAACCGATCTCCTATTCCACAAATCGCAGGCACACGGATAGCAGTCCCTTGACCCTG
A_tiles_P08638:128	LRKSAFETTEIEPRSYKTLRGEPISYSTNRRHTDSSPLTLLSSSTNFDPVHST	LEU3	P08638	128	0.0110169	0.744348	-0.915133	0.0097206	0.0108359	0.0126946	0.589963	0.904094	0.773194	0.0067161	0.599399	-2.08848	0.00652333	0.00691457	0.513052	0.700277	CTGCGCAAGTCCGCCTTTGAGACCACTGAGATCGAACCCCGGTCTTACAAAACTCTCCGCGGCGAGCCTATTAGCTATTCTACCAATAGGAGACATACCGATAGCAGTCCACTGACACTGTTGTCATCCAGCACAAACTTCGACCCGGTGCACTCCACG
A_tiles_P08638:13	GSEMSHSETRNRTGMNARKRKFACVECRQQKSKCDAHERAPEPCTKCAKKNVP	LEU3	P08638	13	0.0827609			0.0844002	0.0916958	0.0732458	5.12243	7.65066	4.46119	0.0120382	1.07438	0.292759	0.0119713	0.0121054	0.941531	1.22598	GGCAGTGAGATGAGCCACTCTGAGACTCGGAACCGCACCGGAATGAATGCAAGAAAACGCAAATTCGCCTGTGTCGAATGCAGGCAGCAAAAATCCAAGTGTGACGCTCATGAACGGGCGCCAGAGCCCTGCACAAAGTGCGCCAAGAAGAACGTGCCT
A_tiles_P08638:141	RSYKTLRGEPISYSTNRRHTDSSPLTLLSSSTNFDPVHSTNVMTDDQLKCLPK	LEU3	P08638	141	0.0148658	1.00439	0.0135925	0.0181472	0.0091664	0.0197495	1.10139	0.764801	1.20288	0.00569545	0.508308	-2.7611	0.00547017	0.00593002	0.430222	0.600566	CGCTCCTACAAGACCCTGAGGGGCGAGCCCATCAGCTATTCTACAAACCGGAGACATACTGACTCCTCACCTCTGACACTCTTGAGCAGTAGCACGAATTTCGATCCAGTCCACTCCACCAACGTGATGACCGACGACCAGCTCAAATGCCTGCCGAAG
A_tiles_P08638:154	STNRRHTDSSPLTLLSSSTNFDPVHSTNVMTDDQLKCLPKSLGDVYLSSSDIA	LEU3	P08638	154	0.0131536	0.888712	-0.365689	0.0127065	0.00679578	0.0263553	0.771185	0.567007	1.60523	0.0135941	1.21324	0.788739	0.0152797	0.0120944	1.20173	1.22487	TCCACCAACCGCCGGCACACCGACTCTTCACCCCTGACCCTGTTGAGCAGCTCCACTAATTTCGATCCAGTGCATTCCACAAACGTGATGACGGATGACCAGCTCAAATGCCTGCCTAAGAGTCTGGGCGACGTCTACCTCAGTTCTAGCGACATCGCC
A_tiles_P08638:167	LLSSSTNFDPVHSTNVMTDDQLKCLPKSLGDVYLSSSDIAELFQEFATKYHQF	LEU3	P08638	167	0.0213474	1.44232	1.13521	0.0226686	0.0182201	0.0235536	1.37581	1.5202	1.43458	0.0182233	1.62639	1.98457	0.0194317	0.01709	1.52828	1.7308	CTGCTGTCCAGCAGTACGAACTTTGACCCCGTGCATTCCACTAATGTCATGACCGATGACCAACTCAAGTGCCTCCCTAAATCTTTGGGCGATGTGTATCTGAGCTCCTCAGACATCGCTGAACTGTTCCAGGAGTTCGCCACAAAGTACCACCAGTTC
A_tiles_P08638:179	STNVMTDDQLKCLPKSLGDVYLSSSDIAELFQEFATKYHQFLPVVDLSKGAER	LEU3	P08638	179	0.0205348	1.38742	1.01493	0.0245468	0.0158793	0.0222149	1.4898	1.32489	1.35305	0.020059	1.79023	2.3762	0.0262938	0.0153026	2.06798	1.54978	TCCACAAACGTGATGACTGACGACCAGCTGAAATGCCTGCCTAAATCTCTCGGGGATGTTTACTTGAGTTCCTCAGATATCGCTGAGCTGTTCCAGGAATTCGCAACCAAGTATCACCAATTTCTGCCCGTCGTGGACCTCAGCAAGGGCGCCGAGCGC
A_tiles_P08638:192	PKSLGDVYLSSSDIAELFQEFATKYHQFLPVVDLSKGAERIYHLSPCLFWVIL	LEU3	P08638	192	0.0111822	0.755518	-0.868962	0.0110016	0.0127019	0.010006	0.667712	1.05978	0.609437	0.0174431	1.55676	1.80602	0.0182653	0.0166578	1.43655	1.68703	CCCAAGTCCCTGGGCGACGTCTACTTGAGTAGCTCTGACATTGCAGAACTCTTCCAGGAGTTCGCTACCAAGTATCATCAGTTTCTGCCTGTTGTGGATCTGTCAAAAGGAGCCGAGAGAATCTACCACCTCAGCCCATGCCTGTTCTGGGTGATCCTG
A_tiles_P08638:205	IAELFQEFATKYHQFLPVVDLSKGAERIYHLSPCLFWVILLIGLRRKFGATDL	LEU3	P08638	205	0.0125664	0.849037	-0.507248	0.012318	0.0138909	0.0115974	0.747604	1.15899	0.706363	0.0152911	1.3647	1.26874	0.0136815	0.01709	1.07603	1.7308	ATCGCCGAGCTGTTCCAGGAGTTTGCTACCAAGTACCATCAGTTTCTCCCCGTGGTGGATCTGTCCAAAGGGGCAGAAAGAATTTATCACCTGAGCCCTTGCTTGTTCTGGGTCATACTGCTGATCGGACTCCGGCGCAAGTTCGGCGCCACAGACCTC
A_tiles_P08638:218	QFLPVVDLSKGAERIYHLSPCLFWVILLIGLRRKFGATDLMTRLSVLVKSVLS	LEU3	P08638	218	0.0105699	0.714149	-1.0435	0.00995826	0.0103619	0.0114444	0.604388	0.864549	0.697046	0.0134438	1.19983	0.743371	0.0150182	0.0120344	1.18116	1.21879	CAGTTCCTGCCCGTGGTGGACCTGTCTAAAGGGGCCGAGCGGATTTACCACCTGTCCCCTTGCCTGTTCTGGGTCATCCTCTTGATCGGCCTCAGGAGAAAGTTTGGAGCTACAGATTTGATGACCCGCCTCTCAGTGCTGGTCAAGAGTGTTCTGAGC
A_tiles_P08638:231	RIYHLSPCLFWVILLIGLRRKFGATDLMTRLSVLVKSVLSEITISPIIRYTPS	LEU3	P08638	231	0.0105594	0.713439	-1.04659	0.0107918	0.00838628	0.0130094	0.654976	0.699711	0.792368	0.0119321	1.06492	0.256641	0.0137402	0.0103619	1.08065	1.04941	CGCATCTATCACCTGTCCCCATGCCTCTTCTGGGTGATCCTGCTCATTGGACTGAGACGGAAATTTGGCGCCACAGACCTGATGACCAGGCTCAGTGTTCTGGTCAAGTCTGTGTTGTCCGAGATAACTATTAGCCCTATCATCCGCTACACGCCCAGC
A_tiles_P08638:243	ILLIGLRRKFGATDLMTRLSVLVKSVLSEITISPIIRYTPSDKDEPVLNVASV	LEU3	P08638	243	0.00844951	0.570884	-1.73751	0.00906633	0.00679033	0.00979877	0.550254	0.566553	0.596815	0.0142266	1.2697	0.974327	0.0166921	0.0121254	1.31281	1.22801	ATCCTGCTGATCGGCCTGAGGAGAAAGTTCGGAGCTACGGATCTCATGACACGGCTGTCAGTCCTGGTGAAATCCGTGCTCTCTGAAATCACCATTAGTCCCATAATTCGCTACACTCCATCCGACAAGGACGAGCCTGTTTTGAACGTCGCCAGCGTG
A_tiles_P08638:256	DLMTRLSVLVKSVLSEITISPIIRYTPSDKDEPVLNVASVYSVQAFLLYTFWP	LEU3	P08638	256	0.00983347	0.664391	-1.26736	0.00936566	0.00849379	0.0119531	0.568421	0.708682	0.72803	0.0142227	1.26935	0.973188	0.0140862	0.0143605	1.10786	1.45437	GACCTGATGACCCGGCTGTCCGTGCTGGTCAAGAGCGTTCTGAGCGAGATAACTATCTCCCCGATTATCCGCTATACACCAAGTGACAAAGATGAACCCGTGTTGAACGTGGCTTCTGTGTACTCAGTCCAGGCCTTTCTCCTCTACACGTTCTGGCCT
A_tiles_P08638:26	GMNARKRKFACVECRQQKSKCDAHERAPEPCTKCAKKNVPCILKRDFRRTYKR	LEU3	P08638	26	0.0245104	1.65602	1.56347	0.0262004	0.0239172	0.023498	1.59016	1.99554	1.4312	0.0146173	1.30457	1.08487	0.0160838	0.0132845	1.26497	1.3454	GGCATGAACGCCAGGAAGAGGAAGTTTGCCTGCGTGGAGTGCAGACAGCAGAAATCCAAATGTGATGCTCACGAACGCGCGCCTGAGCCCTGTACAAAATGCGCAAAGAAGAATGTCCCATGCATCCTGAAGAGAGACTTCCGGCGCACCTACAAGCGG
A_tiles_P08638:269	LSEITISPIIRYTPSDKDEPVLNVASVYSVQAFLLYTFWPPLTSSLSADTSWN	LEU3	P08638	269	0.0290028	1.95955	2.08512	0.0395564	0.0231228	0.0266725	2.40076	1.92926	1.62454	0.0214925	1.91816	2.65785	0.0245631	0.0188057	1.93185	1.90456	CTGAGTGAGATCACCATCTCTCCCATTATACGCTACACACCAAGCGACAAGGATGAACCTGTTTTGAATGTGGCTTCCGTCTACTCAGTGCAGGCCTTTCTCCTCTATACCTTCTGGCCGCCCCTGACGAGCTCCCTGAGCGCAGACACTTCCTGGAAC
A_tiles_P08638:282	PSDKDEPVLNVASVYSVQAFLLYTFWPPLTSSLSADTSWNTIGTAMFQALRVG	LEU3	P08638	282	0.0114214	0.771679	-0.80336	0.0131585	0.0120565	0.00939145	0.798617	1.00594	0.572007	0.0116236	1.03738	0.149754	0.0133749	0.0101016	1.05192	1.02305	CCCTCTGACAAGGACGAGCCGGTGCTCAACGTGGCCTCCGTTTATAGCGTCCAGGCGTTTTTGCTGTACACTTTCTGGCCACCTCTGACGAGCAGTCTGTCCGCAGATACCTCATGGAATACCATCGGCACAGCTATGTTCCAGGCCCTCCGCGTGGGG
A_tiles_P08638:295	VYSVQAFLLYTFWPPLTSSLSADTSWNTIGTAMFQALRVGLNCAGFSKEYASA	LEU3	P08638	295	0.0110081	0.743756	-0.917596	0.0110656	0.00938464	0.0128454	0.671594	0.78301	0.78238	0.0130742	1.16685	0.629639	0.0131748	0.0129744	1.03618	1.31399	GTGTACTCCGTCCAGGCTTTCCTGCTGTATACGTTTTGGCCTCCCCTCACATCCTCACTCTCTGCTGACACCAGCTGGAATACTATCGGCACCGCGATGTTTCAGGCATTGAGAGTGGGACTGAACTGCGCCGGGTTCAGCAAGGAGTACGCCAGTGCC
A_tiles_P08638:308	PPLTSSLSADTSWNTIGTAMFQALRVGLNCAGFSKEYASANSELVNEQIRTWI	LEU3	P08638	308	0.0163516	1.10478	0.308867	0.0175355	0.0132861	0.0187657	1.06427	1.10853	1.14296	0.0101042	0.901783	-0.421842	0.0112012	0.00911466	0.880964	0.923093	CCTCCCCTGACCAGTTCCCTGTCTGCCGACACGAGCTGGAACACAATCGGAACTGCGATGTTTCAAGCTCTGAGAGTGGGCTTGAATTGCGCAGGGTTCTCCAAGGAATACGCCAGCGCCAACTCAGAGCTCGTCAACGAGCAGATTCGCACCTGGATC
A_tiles_P08638:320	WNTIGTAMFQALRVGLNCAGFSKEYASANSELVNEQIRTWICCNVVSQTVASS	LEU3	P08638	320	0.00959898	0.648548	-1.34217	0.00765029	0.00844413	0.0136912	0.464312	0.704539	0.833895	0.0119357	1.06523	0.25786	0.014472	0.00984383	1.13821	0.99694	TGGAACACCATCGGCACAGCCATGTTCCAGGCCCTGCGCGTTGGACTCAATTGTGCAGGGTTTTCCAAGGAGTACGCGTCAGCTAACAGTGAGCTGGTCAACGAACAAATTAGAACTTGGATCTGCTGCAATGTGGTGTCCCAGACGGTGGCCAGCTCT
A_tiles_P08638:333	VGLNCAGFSKEYASANSELVNEQIRTWICCNVVSQTVASSFGFPAYVSFDYLV	LEU3	P08638	333	0.0123619	0.835225	-0.558086	0.0142287	0.0119785	0.011084	0.863567	0.999428	0.675093	0.0120504	1.07547	0.296884	0.0135714	0.0106998	1.06737	1.08363	GTGGGGCTGAACTGCGCCGGCTTCTCAAAGGAGTACGCTTCTGCAAACAGCGAGCTCGTGAACGAACAGATCAGAACATGGATTTGCTGTAATGTGGTCTCCCAGACCGTTGCCAGTTCCTTTGGATTCCCCGCGTATGTCAGCTTCGACTACCTGGTG
A_tiles_P08638:346	SANSELVNEQIRTWICCNVVSQTVASSFGFPAYVSFDYLVISSIRVPNSKSQV	LEU3	P08638	346	0.00860543	0.581419	-1.68083	0.0102137	0.00825456	0.00755856	0.619893	0.688721	0.460371	0.0090106	0.804178	-0.889269	0.0107635	0.00754316	0.846536	0.763939	TCCGCCAACTCCGAACTGGTCAACGAGCAGATTAGGACATGGATCTGCTGTAATGTGGTTTCTCAAACCGTGGCTAGCAGTTTTGGCTTCCCCGCATATGTCAGCTTCGACTACCTCGTGATATCATCTATCCGCGTGCCTAACAGCAAGTCCCAGGTG
A_tiles_P08638:359	WICCNVVSQTVASSFGFPAYVSFDYLVISSIRVPNSKSQVDIPNELRQMAQIA	LEU3	P08638	359	0.0112431	0.759632	-0.852132	0.0120256	0.00956141	0.0123603	0.72986	0.797759	0.752832	0.0141711	1.26474	0.958372	0.0161192	0.0124585	1.26775	1.26174	TGGATCTGCTGTAACGTGGTGTCCCAGACCGTGGCATCCTCTTTTGGCTTCCCTGCCTATGTTAGCTTCGACTACCTGGTCATTTCAAGTATACGGGTCCCAAATTCCAAGAGCCAAGTGGATATCCCCAACGAGCTCCGCCAGATGGCTCAGATCGCC
A_tiles_P08638:372	SFGFPAYVSFDYLVISSIRVPNSKSQVDIPNELRQMAQIARFENQIVNTMNST	LEU3	P08638	372	0.0126188	0.852581	-0.494339	0.0127753	0.0104643	0.0150306	0.77536	0.873091	0.915469	0.0096021	0.856968	-0.629832	0.010228	0.00901449	0.80442	0.912949	TCCTTCGGCTTCCCCGCATACGTTTCTTTTGACTATCTCGTGATCTCCAGCATCCGGGTGCCTAATTCAAAGAGCCAGGTGGATATTCCAAATGAACTGCGCCAAATGGCTCAGATAGCCAGGTTCGAGAACCAGATCGTCAACACAATGAACAGTACC
A_tiles_P08638:38	ECRQQKSKCDAHERAPEPCTKCAKKNVPCILKRDFRRTYKRARNEAIEKRFKE	LEU3	P08638	38	0.0656341			0.0708152	0.0710809	0.0561705	4.29793	5.93065	3.42119	0.0141519	1.26303	0.952841	0.0152065	0.0131705	1.19598	1.33385	GAGTGCAGACAGCAGAAGTCCAAGTGCGACGCTCACGAACGGGCACCTGAACCATGTACAAAATGTGCCAAAAAGAACGTGCCCTGCATCCTGAAGAGAGATTTTCGCAGGACCTACAAACGGGCCAGGAATGAGGCGATTGAGAAGCGCTTCAAGGAG
A_tiles_P08638:384	LVISSIRVPNSKSQVDIPNELRQMAQIARFENQIVNTMNSTPASVTGMVSQEE	LEU3	P08638	384	0.0104545	0.706352	-1.07753	0.00965394	0.00956866	0.0123697	0.585918	0.798363	0.753403	0.0135638	1.21055	0.779651	0.014261	0.0129007	1.12161	1.30653	CTGGTGATCTCCAGTATCCGGGTTCCAAACTCAAAGTCCCAGGTCGACATACCCAATGAGCTCAGACAAATGGCCCAGATTGCTCGCTTCGAAAATCAGATCGTCAACACAATGAACTCTACTCCTGCAAGCGTGACCGGCATGGTGAGCCAGGAGGAG
A_tiles_P08638:397	QVDIPNELRQMAQIARFENQIVNTMNSTPASVTGMVSQEEKQPLLHVLNQQLS	LEU3	P08638	397	0.0113746	0.768517	-0.816087	0.0102387	0.00971175	0.0148002	0.621408	0.810303	0.90144	0.00916782	0.81821	-0.818684	0.0108445	0.00775036	0.852908	0.784923	CAGGTGGACATCCCCAACGAGTTGAGGCAGATGGCCCAAATTGCACGCTTCGAGAATCAGATCGTGAACACAATGAATAGCACTCCAGCTAGTGTTACCGGCATGGTGTCCCAAGAAGAGAAGCAGCCTCTCCTGCACGTCCTGAACCAGCAGCTGTCT
A_tiles_P08638:410	IARFENQIVNTMNSTPASVTGMVSQEEKQPLLHVLNQQLSQLEISLEENNLDD	LEU3	P08638	410	0.0166237	1.12316	0.360013	0.0153083	0.0136143	0.0220423	0.929091	1.13592	1.34253	0.00799477	0.713517	-1.37735	0.0090353	0.00707406	0.710615	0.71643	ATCGCTCGCTTCGAGAACCAGATTGTGAACACCATGAACTCTACACCTGCCAGTGTTACTGGCATGGTGTCCCAGGAAGAAAAGCAACCCCTCCTGCACGTCCTCAATCAGCAGTTGAGCCAGCTGGAGATCTCACTGGAGGAGAACAATCTGGATGAC
A_tiles_P08638:423	STPASVTGMVSQEEKQPLLHVLNQQLSQLEISLEENNLDDIRKFLLLVAKVHL	LEU3	P08638	423	0.0105439	0.712392	-1.05114	0.0130055	0.0082394	0.0109392	0.78933	0.687456	0.666275	0.014368	1.28232	1.01467	0.017209	0.0119961	1.35346	1.21491	TCCACACCCGCTAGTGTGACCGGCATGGTGTCACAGGAAGAAAAACAACCTCTGTTGCATGTTCTCAATCAGCAGCTGAGCCAGTTGGAGATTTCTCTGGAGGAGAACAACCTGGATGACATCAGAAAGTTCCTGCTCCTGGTCGCCAAGGTGCACCTC
A_tiles_P08638:436	EKQPLLHVLNQQLSQLEISLEENNLDDIRKFLLLVAKVHLLTYYFTDVTSQSA	LEU3	P08638	436	0.0114996	0.776961	-0.782219	0.012471	0.0100788	0.0120986	0.756892	0.840931	0.73689	0.0132554	1.18302	0.685807	0.017778	0.00988336	1.39822	1.00094	GAGAAGCAGCCCCTGCTGCACGTTTTGAACCAGCAACTGTCTCAGCTCGAAATTTCCCTGGAGGAGAATAACCTCGATGACATCAGAAAGTTTCTCCTGCTGGTGGCCAAAGTGCATTTGCTGACATACTATTTCACTGACGTCACCAGCCAGAGTGCT
A_tiles_P08638:449	SQLEISLEENNLDDIRKFLLLVAKVHLLTYYFTDVTSQSAGKSNGNIYEGSYS	LEU3	P08638	449	0.0144811	0.978406	-0.067666	0.0161463	0.0138535	0.0135761	0.979951	1.15587	0.82688	0.0361734	3.2284	4.78221	0.0414733	0.0315507	3.26183	3.19532	TCCCAGCTGGAGATCAGCCTGGAGGAGAACAACCTGGATGACATTAGAAAGTTTCTGCTCCTGGTGGCCAAAGTGCACTTGCTCACCTACTATTTCACAGACGTCACTAGTCAGTCTGCTGGAAAGAGCAATGGGAACATCTACGAAGGCTCCTACTCA
A_tiles_P08638:461	DDIRKFLLLVAKVHLLTYYFTDVTSQSAGKSNGNIYEGSYSIMELDTSFETKR	LEU3	P08638	461	0.013501	0.912184	-0.28489	0.0150152	0.0112016	0.0146314	0.911305	0.934605	0.891159	0.0185525	1.65577	2.05763	0.0197462	0.0174309	1.55301	1.76533	GACGACATCCGCAAGTTCCTGCTGTTGGTCGCTAAGGTGCACCTCCTCACATATTACTTTACTGATGTGACCAGTCAGAGCGCCGGCAAATCAAACGGAAATATTTACGAAGGGTCTTACTCCATCATGGAGCTGGATACGTCCTTCGAGACCAAGCGG
A_tiles_P08638:474	HLLTYYFTDVTSQSAGKSNGNIYEGSYSIMELDTSFETKRGLVKVYNAAVNFL	LEU3	P08638	474	0.017763	1.20014	0.565484	0.015847	0.0173892	0.0203386	0.961789	1.45087	1.23877	0.0108617	0.969387	-0.126866	0.0129437	0.00911466	1.018	0.923093	CACCTGCTCACTTACTACTTTACAGACGTCACGAGTCAGAGCGCAGGAAAGTCCAATGGCAACATTTATGAGGGGTCCTATTCTATCATGGAGCTGGATACCAGCTTCGAAACCAAAAGAGGCCTGGTTAAGGTGTACAACGCTGCCGTGAACTTCTTG
A_tiles_P08638:487	SAGKSNGNIYEGSYSIMELDTSFETKRGLVKVYNAAVNFLIHANSMWEHDPTI	LEU3	P08638	487	0.0178507	1.20607	0.580752	0.0169465	0.0167217	0.0200726	1.02852	1.39518	1.22257	0.00999833	0.892331	-0.464836	0.0111962	0.00892864	0.880565	0.904254	TCCGCAGGGAAGAGTAATGGCAATATCTACGAGGGCTCTTACAGCATAATGGAGCTCGATACTTCCTTCGAGACAAAGAGAGGACTGGTGAAAGTCTATAACGCCGCTGTGAACTTTCTGATTCATGCCAACAGCATGTGGGAACACGACCCCACCATC
A_tiles_P08638:500	YSIMELDTSFETKRGLVKVYNAAVNFLIHANSMWEHDPTIIKYFPGLFVLNIW	LEU3	P08638	500	0.0142512	0.962873	-0.117266	0.0176404	0.0115311	0.0142291	1.07063	0.962103	0.866652	0.0173111	1.54498	1.77504	0.0178625	0.0167768	1.40486	1.69908	TACAGCATCATGGAGCTGGACACCTCTTTTGAGACTAAACGCGGGTTGGTTAAGGTCTACAATGCTGCAGTGAACTTCCTGATTCATGCCAACTCCATGTGGGAACACGATCCTACAATCATAAAGTATTTCCCCGGCCTCTTCGTGCTGAACATCTGG
A_tiles_P08638:51	RAPEPCTKCAKKNVPCILKRDFRRTYKRARNEAIEKRFKELTRTLTNLTSDEI	LEU3	P08638	51	0.0138631	0.93665	-0.202853	0.0187994	0.0121422	0.0116718	1.14098	1.01309	0.710899	0.0154623	1.37998	1.31417	0.020573	0.0116212	1.61804	1.17694	CGCGCCCCTGAGCCCTGCACCAAATGCGCTAAGAAGAACGTGCCATGTATCCTGAAACGGGATTTTCGCCGGACATACAAAAGGGCCAGGAATGAGGCAATCGAAAAGAGATTCAAGGAACTCACCAGAACTCTGACGAACTTGACCTCCGACGAGATT
A_tiles_P08638:513	RGLVKVYNAAVNFLIHANSMWEHDPTIIKYFPGLFVLNIWQSACIISKLIHSS	LEU3	P08638	513	0.0103345	0.698244	-1.11332	0.0107809	0.00916238	0.011174	0.654313	0.764465	0.680579	0.0141277	1.26087	0.945842	0.0151539	0.0131709	1.19184	1.33389	CGCGGCCTCGTCAAAGTTTACAACGCCGCTGTGAATTTCTTGATACACGCCAACTCCATGTGGGAGCATGACCCTACCATCATTAAGTATTTTCCCGGACTGTTCGTGCTGAACATTTGGCAGTCAGCATGCATCATCTCTAAGCTGATCCACAGTAGC
A_tiles_P08638:525	FLIHANSMWEHDPTIIKYFPGLFVLNIWQSACIISKLIHSSLHSMLDVNSGKK	LEU3	P08638	525	0.0119134	0.804921	-0.672635	0.0114526	0.0107853	0.013689	0.695082	0.899877	0.83376	0.0109057	0.973314	-0.110368	0.0114516	0.0103858	0.900657	1.05183	TTCCTCATCCACGCCAATTCCATGTGGGAGCATGACCCCACCATTATAAAATACTTTCCTGGGCTGTTCGTGCTCAACATCTGGCAGTCTGCTTGCATCATTAGCAAGTTGATCCACAGTTCACTGCACAGCATGCTGGATGTCAACTCCGGCAAGAAG
A_tiles_P08638:538	TIIKYFPGLFVLNIWQSACIISKLIHSSLHSMLDVNSGKKAYNNAISLTFNAS	LEU3	P08638	538	0.0112255	0.75844	-0.856997	0.0109557	0.0102347	0.0126153	0.664925	0.853935	0.768364	0.0129633	1.15695	0.594867	0.0141502	0.0118759	1.1129	1.20274	ACCATCATCAAGTATTTCCCCGGCCTGTTTGTGCTGAACATTTGGCAGTCAGCTTGCATTATCTCCAAGCTCATACACAGCTCCTTGCATAGCATGCTGGACGTCAATAGTGGGAAAAAGGCATACAATAACGCCATCTCCCTCACATTCAACGCCTCT
A_tiles_P08638:551	IWQSACIISKLIHSSLHSMLDVNSGKKAYNNAISLTFNASVLKYDMAYRSSGI	LEU3	P08638	551	0.0100923	0.681877	-1.18684	0.00993678	0.0075288	0.0137403	0.603084	0.628168	0.836883	0.0133883	1.19488	0.726495	0.0164767	0.0108788	1.29587	1.10176	ATCTGGCAGTCTGCCTGCATCATCAGCAAGCTGATACACTCAAGCTTGCATAGCATGCTGGATGTGAACTCTGGAAAGAAAGCGTACAACAACGCAATTTCCCTCACCTTCAATGCTTCCGTCCTGAAGTATGACATGGCCTACAGAAGTTCCGGCATT
A_tiles_P08638:564	SSLHSMLDVNSGKKAYNNAISLTFNASVLKYDMAYRSSGIMRSIWSLFANMYD	LEU3	P08638	564	0.0188994	1.27692	0.757699	0.0244103	0.0137449	0.0201201	1.48151	1.14681	1.22546	0.0208004	1.8564	2.52431	0.0215518	0.0200753	1.69502	2.03314	TCCTCTCTGCACAGCATGTTGGACGTCAATAGCGGCAAGAAGGCATACAATAACGCGATTTCCCTGACCTTTAACGCCAGTGTGCTGAAATACGATATGGCTTATCGCTCATCCGGAATCATGAGGAGCATCTGGTCTCTCTTCGCCAACATGTACGAC
A_tiles_P08638:577	KAYNNAISLTFNASVLKYDMAYRSSGIMRSIWSLFANMYDAWKNDQKEGGGRL	LEU3	P08638	577	0.0175299	1.18439	0.524541	0.0204978	0.0127101	0.0206768	1.24405	1.06047	1.25937	0.0159366	1.42231	1.43746	0.0163765	0.0155085	1.28799	1.57064	AAGGCGTACAACAACGCAATCTCTTTGACCTTTAACGCCTCCGTGCTCAAATACGATATGGCTTACAGAAGCAGCGGGATTATGCGCAGTATCTGGTCACTGTTCGCCAATATGTATGACGCCTGGAAGAATGACCAGAAGGAGGGCGGAGGCCGGCTG
A_tiles_P08638:590	SVLKYDMAYRSSGIMRSIWSLFANMYDAWKNDQKEGGGRLNNDFNLGITIKSR	LEU3	P08638	590	0.0135778	0.917371	-0.267314	0.0175574	0.0109488	0.0130215	1.0656	0.913512	0.793101	0.0217875	1.94449	2.71349	0.0213145	0.0222711	1.67636	2.25552	TCCGTGCTGAAGTACGACATGGCATATAGGTCCTCAGGCATAATGCGCAGCATTTGGTCTTTGTTTGCCAACATGTACGACGCTTGGAAGAATGACCAGAAAGAGGGAGGTGGCAGACTGAATAACGATTTCAACCTCGGGATCACCATCAAGAGTCGG
A_tiles_P08638:602	GIMRSIWSLFANMYDAWKNDQKEGGGRLNNDFNLGITIKSRMSVNVFFDCLYI	LEU3	P08638	602	0.0132975	0.898435	-0.331963	0.0151731	0.0109488	0.0141538	0.920886	0.913512	0.862067	0.0146223	1.30501	1.08625	0.0189177	0.0113022	1.48785	1.14464	GGCATCATGCGCAGTATATGGTCTCTCTTCGCCAACATGTATGATGCTTGGAAGAATGACCAGAAAGAGGGTGGCGGAAGATTGAACAACGACTTTAATCTGGGGATCACCATTAAGAGCAGGATGTCCGTCAACGTGTTCTTCGACTGCCTGTACATC
A_tiles_P08638:615	YDAWKNDQKEGGGRLNNDFNLGITIKSRMSVNVFFDCLYILKEKCGMAKLERE	LEU3	P08638	615	0.0137572	0.929494	-0.226623	0.0151826	0.0104182	0.0164608	0.921465	0.869245	1.00258	0.0143076	1.27693	0.997488	0.0154184	0.0132768	1.21264	1.34462	TACGACGCCTGGAAGAACGACCAGAAAGAGGGAGGCGGTAGACTCAATAACGATTTTAACTTGGGCATCACCATCAAATCCCGCATGAGCGTCAATGTGTTCTTCGACTGTCTGTATATTCTGAAGGAGAAGTGCGGGATGGCTAAGCTGGAACGGGAG
A_tiles_P08638:628	RLNNDFNLGITIKSRMSVNVFFDCLYILKEKCGMAKLERETKVSTAYNVDEEE	LEU3	P08638	628	0.0141179	0.953867	-0.146396	0.0158929	0.0115207	0.0153685	0.964574	0.961233	0.93605	0.0126711	1.13087	0.501838	0.0134749	0.0119152	1.05978	1.20672	CGCCTGAATAACGATTTTAACCTGGGGATTACTATCAAGTCCAGGATGAGCGTGAACGTGTTCTTCGACTGCCTCTATATCTTGAAGGAGAAATGTGGCATGGCTAAACTGGAACGGGAGACCAAGGTTTCTACAGCCTACAATGTCGACGAAGAGGAG
A_tiles_P08638:64	VPCILKRDFRRTYKRARNEAIEKRFKELTRTLTNLTSDEILKKIEEEQEIVLD	LEU3	P08638	64	0.0239872	1.62068	1.4966	0.0363165	0.01844	0.0206099	2.20412	1.53855	1.25529	0.010506	0.93764	-0.262735	0.0112448	0.00981578	0.884387	0.9941	GTGCCCTGCATCCTGAAGCGGGATTTCCGCCGCACCTACAAAAGAGCTAGGAACGAAGCCATTGAGAAGCGGTTTAAAGAGTTGACGAGGACTCTGACCAATCTCACATCCGACGAAATACTGAAGAAGATCGAAGAGGAGCAGGAGATCGTCCTCGAC
A_tiles_P08638:641	SRMSVNVFFDCLYILKEKCGMAKLERETKVSTAYNVDEEEEEDEDEEGEEEEE	LEU3	P08638	641	0.0135568	0.915954	-0.272105	0.0111158	0.0123524	0.0181459	0.674641	1.03063	1.10521	0.0144343	1.28823	1.03345	0.0155962	0.0133589	1.22662	1.35293	TCTCGCATGTCCGTGAATGTGTTCTTTGACTGCCTGTACATCCTCAAGGAGAAGTGTGGGATGGCTAAACTGGAAAGAGAGACCAAAGTCAGCACAGCCTATAACGTTGATGAAGAAGAGGAGGAAGACGAGGACGAGGAGGGCGAGGAAGAGGAAGAG
A_tiles_P08638:654	ILKEKCGMAKLERETKVSTAYNVDEEEEEDEDEEGEEEEEEEELSSKVPENMD	LEU3	P08638	654	0.0125573	0.763479	-0.836473	0.0126883		0.0124277	0.770079		0.756937	0.0146507	1.30754	1.09417	0.0185539	0.0115686	1.45924	1.17162	ATCCTGAAGGAGAAGTGCGGCATGGCCAAACTGGAGAGAGAAACAAAAGTCTCCACCGCTTACAATGTGGACGAGGAAGAAGAAGAGGATGAGGACGAGGAGGGAGAAGAGGAAGAGGAGGAGGAAGAGCTCTCTAGCAAGGTGCCCGAGAACATGGAC
A_tiles_P08638:666	RETKVSTAYNVDEEEEEDEDEEGEEEEEEEELSSKVPENMDSQQLRTRKFTNV	LEU3	P08638	666	0.0192903	1.30333	0.821147	0.0220093	0.0192024	0.0169845	1.33579	1.60216	1.03448	0.0164091	1.46448	1.55668	0.0187872	0.014332	1.47759	1.45148	CGGGAGACTAAGGTGAGCACCGCCTACAACGTGGACGAGGAGGAGGAAGAAGACGAGGATGAGGAGGGCGAGGAAGAGGAAGAAGAGGAGGAACTCTCTTCCAAAGTTCCCGAGAATATGGACAGTCAGCAGCTGCGCACAAGGAAGTTCACGAACGTC
A_tiles_P08638:679	EEEEDEDEEGEEEEEEEELSSKVPENMDSQQLRTRKFTNVRHPEKKARKIIET	LEU3	P08638	679	0.0165035	1.11505	0.337531	0.0175074	0.0168442	0.0152425	1.06256	1.4054	0.928379	0.0159984	1.42782	1.45325	0.0224647	0.0113933	1.76682	1.15387	GAGGAAGAGGAAGACGAGGACGAGGAGGGCGAAGAGGAGGAGGAAGAAGAGGAACTGTCTTCCAAAGTCCCTGAGAATATGGATAGCCAGCAGCTCCGCACACGGAAATTCACCAACGTGAGACACCCCGAGAAGAAGGCCAGGAAGATTATCGAGACT
A_tiles_P08638:692	EEEEELSSKVPENMDSQQLRTRKFTNVRHPEKKARKIIETIPLDPNPINAGST	LEU3	P08638	692	0.0126978	0.85792	-0.474989	0.0115239	0.0124733	0.0142434	0.699407	1.04071	0.867523	0.0115298	1.02901	0.116702	0.012458	0.0106708	0.979804	1.08069	GAGGAGGAAGAGGAGCTCAGTTCCAAGGTGCCTGAAAACATGGACAGCCAACAGCTGCGGACAAGGAAATTCACCAATGTCCGCCACCCCGAAAAAAAGGCTAGAAAGATCATTGAGACGATACCACTGGATCCGAACCCCATCAACGCCGGCTCTACT
A_tiles_P08638:705	MDSQQLRTRKFTNVRHPEKKARKIIETIPLDPNPINAGSTSSGSSLTTPNSQV	LEU3	P08638	705	0.0104103	0.703364	-1.09067	0.0109496	0.00767541	0.0134242	0.664557	0.6404	0.81763	0.010654	0.950845	-0.205672	0.0129721	0.00875007	1.02024	0.886169	ATGGACTCCCAGCAGCTGCGCACCCGGAAGTTCACTAACGTGAGGCACCCCGAAAAAAAGGCTAGAAAGATCATCGAGACCATTCCCCTCGATCCTAACCCGATAAATGCCGGATCTACGAGTTCAGGCAGCAGCCTGACAACCCCAAACTCCCAAGTC
A_tiles_P08638:718	VRHPEKKARKIIETIPLDPNPINAGSTSSGSSLTTPNSQVANTISYRGILNKM	LEU3	P08638	718	0.0124402	0.840515	-0.538516	0.0141431	0.00916278	0.0148564	0.858374	0.764499	0.904864	0.00702236	0.626732	-1.90653	0.00889817	0.00554199	0.69983	0.561269	GTCCGCCACCCCGAGAAGAAGGCTCGGAAAATCATCGAAACTATTCCACTCGACCCCAACCCTATTAATGCAGGGAGCACCTCTAGTGGAAGCTCACTGACCACACCGAATTCCCAGGTGGCCAACACGATATCCTACAGGGGCATCCTGAACAAGATG
A_tiles_P08638:730	ETIPLDPNPINAGSTSSGSSLTTPNSQVANTISYRGILNKMSPREQLNHANLD	LEU3	P08638	730	0.0108591	0.733684	-0.959858	0.0114582	0.00910197	0.012278	0.695419	0.759426	0.747817	0.00697437	0.622448	-1.93451	0.00779393	0.00624098	0.612983	0.63206	GAGACGATCCCCCTGGATCCCAACCCGATCAATGCTGGCTCCACAAGCTCTGGATCCTCCTTGACTACCCCTAATAGCCAGGTGGCAAATACCATTAGTTACCGCGGGATACTGAACAAGATGTCACCAAGGGAACAGCTCAACCACGCCAACCTGGAC
A_tiles_P08638:743	STSSGSSLTTPNSQVANTISYRGILNKMSPREQLNHANLDSSVSTDIKDTEAV	LEU3	P08638	743	0.0113159	0.76455	-0.832129	0.0112819	0.0102892	0.0124826	0.68472	0.858481	0.76028	0.00835366	0.745548	-1.19816	0.00828594	0.00842194	0.651679	0.852938	TCCACGAGCAGTGGGTCCTCCTTGACCACCCCTAACTCACAGGTCGCAAATACTATTTCTTACCGCGGCATCCTCAACAAGATGAGCCCCAGAGAACAGCTGAATCACGCTAACCTGGATAGTTCTGTGAGCACAGACATCAAAGACACCGAGGCCGTG
A_tiles_P08638:756	QVANTISYRGILNKMSPREQLNHANLDSSVSTDIKDTEAVNEPLPIGRNAEHP	LEU3	P08638	756	0.0104877	0.708594	-1.06771	0.00992203	0.00940667	0.0123596	0.602189	0.784848	0.752791	0.00772912	0.689809	-1.51523	0.0078737	0.0075872	0.619257	0.768399	CAGGTGGCCAACACAATCAGTTACCGCGGCATTCTGAATAAGATGAGCCCAAGGGAACAGTTGAACCATGCAAACCTGGACTCCTCAGTGTCTACTGACATAAAAGATACCGAGGCTGTCAATGAGCCTCTCCCGATCGGGCGGAACGCCGAGCACCCC
A_tiles_P08638:769	KMSPREQLNHANLDSSVSTDIKDTEAVNEPLPIGRNAEHPANQPPLSITQMQE	LEU3	P08638	769	0.00895675	0.605156	-1.55681	0.00916494	0.00764208	0.0102591	0.55624	0.637619	0.624854	0.00736844	0.657619	-1.71023	0.00778963	0.00697003	0.612644	0.705895	AAGATGTCCCCCAGGGAGCAGTTGAACCACGCTAACCTGGACTCTAGCGTCAGTACAGACATCAAAGATACTGAGGCAGTGAACGAACCCCTCCCTATTGGCAGAAATGCCGAACATCCTGCCAATCAACCACCGCTGTCAATCACCCAGATGCAGGAG
A_tiles_P08638:77	KRARNEAIEKRFKELTRTLTNLTSDEILKKIEEEQEIVLDNSNFTKEKVKQLR	LEU3	P08638	77	0.0154035	1.04073	0.123735	0.0170417	0.0138181	0.0155203	1.0343	1.15291	0.945301	0.00843115	0.752463	-1.16049	0.00968954	0.00733619	0.76207	0.742977	AAGCGCGCCCGCAACGAGGCTATTGAGAAGAGGTTTAAAGAGCTCACAAGAACTCTGACCAACCTGACGTCCGACGAAATATTGAAGAAAATCGAGGAAGAGCAGGAGATCGTGCTCGATAACAGCAATTTCACCAAAGAAAAGGTCAAGCAGCTGCGG
A_tiles_P08638:782	DSSVSTDIKDTEAVNEPLPIGRNAEHPANQPPLSITQMQENTLPATQANSSLL	LEU3	P08638	782	0.00884618	0.597685	-1.59531	0.00910005	0.00660756	0.0115128	0.552301	0.551303	0.701215	0.00785454	0.701002	-1.44955	0.00813229	0.00758628	0.639594	0.768306	GACTCCAGCGTGAGTACGGACATCAAGGATACAGAGGCCGTCAACGAGCCTCTCCCTATTGGCAGAAATGCGGAACACCCCGCTAATCAGCCGCCCCTGTCTATCACCCAAATGCAGGAGAACACCCTGCCAGCAACTCAGGCCAACTCATCCCTGTTG
A_tiles_P08638:795	VNEPLPIGRNAEHPANQPPLSITQMQENTLPATQANSSLLETYPIVQSNPVTT	LEU3	P08638	795	0.00980695	0.662599	-1.27573	0.00894372	0.00879846	0.0119861	0.542813	0.734101	0.730038	0.00669136	0.597191	-2.10354	0.00772637	0.005795	0.60767	0.586893	GTGAACGAGCCCCTCCCGATCGGCAGAAACGCCGAGCACCCCGCAAATCAGCCTCCTTTGTCTATTACCCAAATGCAGGAAAACACCCTGCCAGCTACGCAGGCCAATAGTTCCCTGCTGGAGACCTACCCAATCGTCCAGAGCAACCCCGTGACAACT
A_tiles_P08638:807	HPANQPPLSITQMQENTLPATQANSSLLETYPIVQSNPVTTTIKESPNSIMAG	LEU3	P08638	807	0.00817464	0.552313	-1.84001	0.00812843	0.00782054	0.00859336	0.493332	0.652508	0.523398	0.00563469	0.502885	-2.80486	0.00662809	0.00479018	0.521291	0.485129	CACCCCGCCAACCAGCCGCCCCTGAGTATCACGCAGATGCAGGAGAATACACTGCCCGCTACTCAAGCCAATTCATCTCTCTTGGAAACCTACCCTATTGTGCAGTCCAACCCTGTCACAACCACCATAAAGGAGAGCCCAAACAGCATCATGGCAGGC
A_tiles_P08638:820	QENTLPATQANSSLLETYPIVQSNPVTTTIKESPNSIMAGWDNWESDMVWRDV	LEU3	P08638	820	0.0570104	3.85186	4.17992	0.0560667	0.0475046	0.06957	3.4028	3.96356	4.23731	0.0111303	0.993358	-0.0271917	0.0139069	0.00890809	1.09376	0.902173	CAGGAGAACACCCTGCCGGCCACGCAGGCAAATTCCTCCCTGCTCGAAACATACCCCATCGTTCAAAGCAATCCAGTGACCACTACCATTAAGGAGTCTCCTAACAGTATCATGGCTGGCTGGGATAACTGGGAGTCAGACATGGTGTGGCGCGACGTC
A_tiles_P08638:833	LLETYPIVQSNPVTTTIKESPNSIMAGWDNWESDMVWRDVDILMNEFAFNPKV	LEU3	P08638	833	0.0865204	5.84568	5.47288	0.118712	0.0628277	0.0868382	7.20487	5.24205	5.28907	0.025377	2.26484	3.33578	0.0296539	0.0217169	2.33224	2.19939	CTGCTCGAGACCTACCCAATCGTCCAGTCTAACCCCGTTACTACAACGATAAAAGAGAGCCCTAATTCCATTATGGCTGGCTGGGACAATTGGGAAAGTGATATGGTGTGGAGAGATGTGGACATCCTGATGAACGAGTTTGCCTTCAACCCGAAGGTG
A_tiles_P08638:90	ELTRTLTNLTSDEILKKIEEEQEIVLDNSNFTKEKVKQLRKSAFETTEIEPRS	LEU3	P08638	90	0.0118128	0.79812	-0.698936	0.0117603	0.00861923	0.0162618	0.713756	0.719148	0.99046	0.0075133	0.670547	-1.63079	0.00743194	0.00759555	0.584513	0.769244	GAGCTGACCCGCACCCTGACCAATCTCACATCCGACGAAATCCTCAAAAAGATAGAGGAGGAACAGGAGATCGTCCTGGATAACTCTAACTTCACGAAAGAGAAGGTGAAGCAGTTGCGGAAGAGTGCCTTTGAAACTACAGAAATTGAGCCCAGGAGC
A_tiles_P0CE41:0	MSNTPYNSSVPSIASMTQSSVSRSPNMHTATTPGANTSSNSPPLHMSSDSSKI	HAP1	P0CE41	0	0.010294	0.695506	-1.12549	0.0113725	0.00839568	0.0114246	0.690222	0.700496	0.695839	0.00897672	0.801154	-0.904641	0.00943501	0.00854068	0.742051	0.864964	ATGTCCAACACCCCTTACAACTCAAGCGTGCCCTCAATCGCTAGTATGACGCAGTCTTCTGTCAGCAGATCCCCAAATATGCATACCGCCACTACACCCGGCGCAAATACCTCCTCCAACAGCCCTCCGCTGCACATGAGCAGCGACAGTTCCAAGATT
A_tiles_P0CE41:1009	CMIFFNNIRNTNSLFDYMNVILSYPCLDIGHRSLQFIVCLILRAKCGPLTGMR	HAP1	P0CE41	1009	0.0150339	1.01576	0.0484587	0.0174148	0.0116038	0.0168152	1.05694	0.968166	1.02416	0.0134027	1.19616	0.730872	0.015444	0.0116311	1.21465	1.17795	TGCATGATCTTCTTCAATAACATCAGGAACACAAACTCCCTCTTCGACTACATGAATGTCATCCTGAGCTATCCTTGTTTGGATATTGGGCACCGGTCTCTGCAGTTTATAGTGTGTCTGATTCTCAGAGCCAAGTGCGGACCCCTGACCGGCATGCGC
A_tiles_P0CE41:1022	LFDYMNVILSYPCLDIGHRSLQFIVCLILRAKCGPLTGMRESSIITNGTSSGF	HAP1	P0CE41	1022	0.0110128	0.74407	-0.916289	0.0115033	0.00881824	0.013167	0.698159	0.735753	0.801964	0.0116055	1.03576	0.143387	0.0133987	0.0100523	1.05379	1.01805	CTGTTCGACTACATGAATGTGATCCTGTCCTATCCCTGCCTCGATATCGGACACAGATCTCTGCAGTTTATTGTCTGCCTCATTCTGAGGGCCAAGTGTGGTCCTTTGACAGGCATGCGCGAGAGCAGCATAATCACTAACGGGACCAGTTCCGGCTTC
A_tiles_P0CE41:1035	LDIGHRSLQFIVCLILRAKCGPLTGMRESSIITNGTSSGFNSSVEDEDVKVKQ	HAP1	P0CE41	1035	0.010392	0.702127	-1.09613	0.00778975	0.00958016	0.0150384	0.472776	0.799323	0.915946	0.013757	1.22778	0.837351	0.0146665	0.0129039	1.1535	1.30685	CTGGACATCGGCCACCGCAGCCTGCAGTTCATAGTGTGCTTGATCCTCAGAGCCAAATGTGGTCCCCTGACTGGAATGAGGGAGTCAAGTATTATCACAAATGGCACCTCCTCCGGGTTTAACAGCTCTGTCGAGGATGAAGACGTTAAGGTGAAGCAG
A_tiles_P0CE41:104	EKELLKDNELKKLRERVKSLEKTLSKVHSSPSSNSLKSYNTPESSNLFMGSDE	HAP1	P0CE41	104	0.0139014	0.939241	-0.194291	0.0142304	0.0127382	0.0148203	0.863672	1.06281	0.902663	0.00956544	0.853696	-0.645442	0.00966672	0.00946522	0.760275	0.958596	GAGAAGGAGCTGCTGAAGGATAATGAGCTGAAGAAGCTCCGCGAAAGAGTGAAATCCCTGGAAAAGACATTGAGCAAAGTCCACTCTAGTCCCTCCTCAAACAGCCTGAAATCCTACAACACCCCTGAAAGCAGTAACCTCTTCATGGGCTCTGACGAG
A_tiles_P0CE41:1048	LILRAKCGPLTGMRESSIITNGTSSGFNSSVEDEDVKVKQESSDELKKDDFMK	HAP1	P0CE41	1048	0.0100433	0.678568	-1.20191	0.0091867	0.0101905	0.0108212	0.55756	0.850249	0.659087	0.0083376	0.744114	-1.20601	0.00971276	0.00715715	0.763896	0.724845	CTGATCTTGCGCGCCAAGTGCGGGCCCCTCACTGGAATGAGGGAAAGCTCTATCATTACAAATGGTACCTCCAGCGGCTTTAACTCAAGTGTCGAGGATGAAGATGTGAAAGTGAAACAGGAGTCCTCCGACGAGCTGAAGAAGGACGACTTCATGAAG
A_tiles_P0CE41:1061	RESSIITNGTSSGFNSSVEDEDVKVKQESSDELKKDDFMKDVNLDSGDSLAEI	HAP1	P0CE41	1061	0.010768	0.727531	-0.985964	0.0103679	0.00896569	0.0134316	0.629249	0.748054	0.818084	0.00886472	0.791159	-0.955867	0.0101846	0.00771587	0.801009	0.78143	CGCGAGTCCTCCATCATCACAAACGGAACCAGCTCAGGCTTTAATTCTAGCGTTGAGGATGAGGATGTGAAGGTCAAGCAGGAAAGCTCTGACGAACTGAAGAAAGACGACTTCATGAAAGACGTGAACCTCGATTCCGGGGACAGTCTGGCCGAGATT
A_tiles_P0CE41:1074	FNSSVEDEDVKVKQESSDELKKDDFMKDVNLDSGDSLAEILMSRMLLFQKLTK	HAP1	P0CE41	1074	0.0156959	1.06048	0.182014	0.0171125	0.0108335	0.0208582	1.03859	0.903896	1.27041	0.0129586	1.15653	0.593397	0.015428	0.0108845	1.21339	1.10233	TTCAACTCTTCCGTGGAGGATGAGGACGTGAAAGTCAAACAGGAAAGCAGCGACGAGTTGAAGAAGGACGACTTTATGAAGGACGTTAATCTCGATTCAGGCGATAGTCTGGCCGAAATCCTGATGTCCAGAATGCTGCTCTTCCAGAAACTGACCAAG
A_tiles_P0CE41:1087	QESSDELKKDDFMKDVNLDSGDSLAEILMSRMLLFQKLTKQLSKKYNYAIRMN	HAP1	P0CE41	1087	0.0219068	1.48012	1.2154	0.0271794	0.0182194	0.0212307	1.64958	1.52014	1.2931	0.0169668	1.51426	1.69307	0.0207367	0.0138823	1.63091	1.40594	CAGGAGTCCAGCGACGAGCTCAAAAAAGACGACTTTATGAAGGACGTGAACCTCGATTCTGGCGATTCACTGGCTGAAATTTTGATGAGTAGGATGCTGCTGTTCCAAAAGCTGACCAAGCAGCTGTCCAAAAAGTACAACTATGCCATCCGCATGAAT
A_tiles_P0CE41:1100	KDVNLDSGDSLAEILMSRMLLFQKLTKQLSKKYNYAIRMNKSTGFFVSLLDTP	HAP1	P0CE41	1100	0.0102414	0.691951	-1.14138	0.00924248	0.00816988	0.0142256	0.560946	0.681656	0.866443	0.0165685	1.4787	1.59612	0.0220307	0.0124605	1.73269	1.26195	AAGGACGTGAACCTGGACTCCGGGGATAGTCTGGCCGAGATTCTCATGTCTCGGATGTTGCTCTTTCAGAAACTCACTAAGCAGCTGTCCAAGAAGTACAACTATGCTATCCGCATGAATAAAAGCACAGGCTTCTTCGTCAGCCTGCTGGACACCCCC
A_tiles_P0CE41:1113	ILMSRMLLFQKLTKQLSKKYNYAIRMNKSTGFFVSLLDTPSKKSDSKSGGSSF	HAP1	P0CE41	1113	0.0122269	0.826101	-0.592132	0.010952	0.0103725	0.0160906	0.664699	0.865432	0.980034	0.015131	1.35041	1.22579	0.0171643	0.0133385	1.34995	1.35087	ATCCTGATGTCCCGGATGCTGTTGTTCCAGAAGCTGACAAAGCAGCTCTCCAAGAAGTACAACTATGCCATTCGCATGAATAAGTCAACCGGCTTCTTTGTGAGCCTGCTCGATACTCCCAGTAAAAAAAGCGACTCCAAAAGCGGAGGGTCTTCTTTC
A_tiles_P0CE41:1126	KQLSKKYNYAIRMNKSTGFFVSLLDTPSKKSDSKSGGSSFMLGNWKHPKVSNM	HAP1	P0CE41	1126	0.0156337	1.05628	0.169698	0.0159832	0.0139348	0.0171561	0.970053	1.16265	1.04493	0.0126746	1.13119	0.502983	0.0164827	0.00974636	1.29635	0.98707	AAGCAGCTGTCCAAGAAGTACAACTATGCCATCCGCATGAATAAGAGCACAGGGTTCTTTGTCTCCCTGCTCGATACCCCAAGTAAGAAAAGCGACTCAAAATCTGGAGGCTCCTCTTTCATGTTGGGCAACTGGAAACACCCCAAGGTGAGCAACATG
A_tiles_P0CE41:1138	MNKSTGFFVSLLDTPSKKSDSKSGGSSFMLGNWKHPKVSNMSGFLAGDKDQLQ	HAP1	P0CE41	1138	0.014658	0.990358	-0.0300312	0.0171069	0.0128809	0.0142925	1.03825	1.07472	0.870518	0.0116184	1.03692	0.147942	0.0147806	0.00913278	1.16248	0.924928	ATGAACAAGTCCACCGGGTTCTTCGTCAGTCTGCTGGACACACCCAGCAAAAAATCCGATTCTAAGTCTGGTGGCTCCAGCTTTATGCTGGGCAATTGGAAACACCCTAAGGTGAGCAACATGTCAGGGTTCTTGGCCGGAGACAAGGACCAGCTCCAG
A_tiles_P0CE41:1151	TPSKKSDSKSGGSSFMLGNWKHPKVSNMSGFLAGDKDQLQKCPVYQDALGFVS	HAP1	P0CE41	1151	0.0149816	1.01222	0.0376569	0.0193415	0.0101065	0.0172023	1.17388	0.843242	1.04774	0.0103888	0.927179	-0.308515	0.0111683	0.00966373	0.87837	0.978701	ACCCCTAGCAAGAAGAGCGACTCTAAGAGTGGCGGGTCCAGCTTTATGCTCGGTAATTGGAAACACCCCAAAGTGTCCAACATGTCAGGCTTCCTGGCTGGAGATAAAGATCAATTGCAGAAGTGCCCAGTCTACCAGGACGCCCTGGGGTTCGTGTCC
A_tiles_P0CE41:116	LRERVKSLEKTLSKVHSSPSSNSLKSYNTPESSNLFMGSDEHTTLVNANTGSA	HAP1	P0CE41	116	0.0105874	0.715327	-1.0384	0.0108379	0.00895807	0.0122237	0.657775	0.747419	0.744512	0.00996587	0.889434	-0.478105	0.0113506	0.00875007	0.89271	0.886169	CTGCGCGAGAGGGTGAAGTCCTTGGAGAAGACTCTGTCTAAAGTCCACAGCTCCCCTTCTAGCAACTCCCTGAAGAGTTACAATACCCCCGAATCCTCAAATCTCTTCATGGGAAGTGACGAGCATACGACACTCGTGAACGCCAACACCGGCAGCGCT
A_tiles_P0CE41:1164	SFMLGNWKHPKVSNMSGFLAGDKDQLQKCPVYQDALGFVSPTGANEGSAPMQG	HAP1	P0CE41	1164	0.0131397	0.887772	-0.36897	0.0145274	0.0123465	0.0126481	0.881699	1.03013	0.770357	0.00778846	0.695104	-1.48403	0.00921122	0.00658546	0.724451	0.666947	TCATTCATGCTGGGCAACTGGAAGCACCCTAAGGTGTCCAATATGAGTGGGTTTTTGGCTGGTGACAAAGATCAGCTGCAGAAATGCCCGGTCTACCAAGACGCACTCGGATTCGTGTCTCCCACCGGGGCCAACGAGGGCAGCGCCCCAATGCAGGGC
A_tiles_P0CE41:1177	NMSGFLAGDKDQLQKCPVYQDALGFVSPTGANEGSAPMQGMSLQGSTARMGGT	HAP1	P0CE41	1177	0.0118243	0.798902	-0.695899	0.0123372	0.00973703	0.0137622	0.748772	0.812412	0.838215	0.00841241	0.750791	-1.16957	0.00938771	0.00753844	0.738332	0.76346	AACATGTCCGGCTTCCTGGCCGGGGACAAGGACCAGCTCCAGAAATGCCCCGTCTACCAAGATGCTCTGGGTTTTGTGAGCCCTACCGGCGCGAATGAGGGCAGTGCACCAATGCAGGGAATGTCATTGCAGGGGTCTACAGCCCGCATGGGAGGCACT
A_tiles_P0CE41:1190	QKCPVYQDALGFVSPTGANEGSAPMQGMSLQGSTARMGGTQLPPIRSYKPITY	HAP1	P0CE41	1190	0.0115132	0.777883	-0.778542	0.0118061	0.0085192	0.0151735	0.716539	0.710802	0.924175	0.00764786	0.682556	-1.55836	0.0078877	0.00741531	0.620358	0.750991	CAGAAGTGCCCCGTCTATCAGGACGCTCTGGGCTTCGTGTCTCCTACAGGAGCCAACGAGGGTTCCGCCCCTATGCAAGGCATGAGTCTCCAGGGGTCAACTGCAAGAATGGGCGGGACCCAGCTGCCGCCAATTAGGAGCTACAAACCCATCACGTAC
A_tiles_P0CE41:1203	SPTGANEGSAPMQGMSLQGSTARMGGTQLPPIRSYKPITYTSSNLRRMNETGE	HAP1	P0CE41	1203	0.0114503	0.773633	-0.795522	0.0119954	0.0108425	0.0115429	0.728023	0.904643	0.703045	0.0124573	1.11179	0.432417	0.0170259	0.00911466	1.33907	0.923093	AGCCCCACGGGCGCCAATGAGGGGTCTGCACCTATGCAGGGTATGAGCCTCCAAGGGTCAACTGCTAGGATGGGAGGCACACAGCTGCCGCCAATTAGATCCTATAAGCCCATCACCTACACCAGTTCCAACCTGCGCCGGATGAACGAAACCGGCGAG
A_tiles_P0CE41:1216	GMSLQGSTARMGGTQLPPIRSYKPITYTSSNLRRMNETGEAEAKRRRFNDGYI	HAP1	P0CE41	1216	0.0129543	0.875248	-0.413008	0.0145828	0.00947054	0.0157408	0.885062	0.790177	0.958729	0.00961309	0.857949	-0.625167	0.0104312	0.0088591	0.820404	0.897212	GGCATGTCCCTGCAGGGGTCAACCGCTAGGATGGGAGGGACACAGCTCCCACCCATTCGGAGCTATAAACCTATCACGTACACTAGTTCTAACCTGAGGCGCATGAATGAAACCGGTGAGGCCGAGGCAAAGCGGCGCAGATTCAACGACGGCTACATC
A_tiles_P0CE41:1229	TQLPPIRSYKPITYTSSNLRRMNETGEAEAKRRRFNDGYIDNNSNNDIPRGIS	HAP1	P0CE41	1229	0.0114981	0.776858	-0.78263	0.0137601	0.0112103	0.00985451	0.835128	0.935336	0.60021	0.0126478	1.1288	0.494348	0.0127405	0.0125559	1.00202	1.27161	ACTCAGCTCCCGCCCATTAGGTCTTACAAGCCTATCACCTATACGAGCTCAAATCTGAGACGGATGAATGAGACAGGAGAAGCTGAGGCCAAACGGCGCCGCTTCAACGATGGGTACATAGACAATAACAGTAACAACGACATCCCAAGGGGCATCTCC
A_tiles_P0CE41:1242	YTSSNLRRMNETGEAEAKRRRFNDGYIDNNSNNDIPRGISPKPSNGLSSVQPL	HAP1	P0CE41	1242	0.0113911	0.769629	-0.811604	0.0113091	0.0106192	0.0123076	0.686374	0.886015	0.749623	0.00899487	0.802774	-0.896397	0.0113141	0.00715105	0.88984	0.724227	TACACATCCTCAAACCTGCGCAGGATGAATGAGACCGGCGAGGCTGAAGCCAAACGGAGACGGTTCAATGACGGATATATCGATAACAACAGCAACAACGACATCCCACGCGGCATTAGTCCTAAGCCGTCTAATGGGCTCAGCTCCGTGCAGCCCCTG
A_tiles_P0CE41:1255	EAEAKRRRFNDGYIDNNSNNDIPRGISPKPSNGLSSVQPLLSSFSMNQLNGGT	HAP1	P0CE41	1255	0.0109575	0.740334	-0.931891	0.0108738	0.00935357	0.0129352	0.659953	0.780417	0.787849	0.00779355	0.695559	-1.48136	0.0095752	0.00634342	0.753077	0.642434	GAGGCTGAAGCCAAGCGCAGGCGGTTTAATGACGGCTACATCGATAACAACTCAAACAACGACATCCCCAGAGGAATTAGCCCTAAACCGAGTAATGGTCTGTCTTCCGTGCAGCCATTGCTCAGCTCCTTCTCCATGAATCAGCTGAACGGGGGCACC
A_tiles_P0CE41:1268	IDNNSNNDIPRGISPKPSNGLSSVQPLLSSFSMNQLNGGTIPTVPSLTNITSQ	HAP1	P0CE41	1268	0.0103264	0.697692	-1.11577	0.0111053	0.00806094	0.0123006	0.674001	0.672567	0.749196	0.00718807	0.641521	-1.81136	0.00825349	0.00626017	0.649127	0.634003	ATCGACAACAATAGCAACAACGATATCCCCAGAGGCATTTCCCCAAAGCCTTCTAATGGCCTGAGCTCCGTGCAACCTCTGTTGTCAAGTTTCTCTATGAATCAGCTGAACGGGGGAACAATACCCACTGTCCCGTCCCTCACGAACATCACCAGCCAG
A_tiles_P0CE41:1281	SPKPSNGLSSVQPLLSSFSMNQLNGGTIPTVPSLTNITSQMGALPSLDRITTN	HAP1	P0CE41	1281																	TCCCCGAAGCCAAGCAACGGCCTCTCTAGTGTGCAGCCCCTGTTGAGCTCTTTCTCCATGAATCAACTGAATGGAGGGACAATTCCCACCGTCCCTTCACTGACTAACATCACGAGCCAGATGGGTGCCCTCCCTTCCCTGGACCGCATCACCACCAAC
A_tiles_P0CE41:129	KVHSSPSSNSLKSYNTPESSNLFMGSDEHTTLVNANTGSASSASHMHQQQQQQ	HAP1	P0CE41	129	0.0085188	0.575566	-1.71219	0.0080305	0.00771689	0.00997585	0.487388	0.643861	0.607601	0.00846396	0.755392	-1.14464	0.0092551	0.00774045	0.727902	0.783919	AAGGTCCACTCCTCACCCAGCTCTAACAGTCTGAAATCCTACAATACACCTGAGTCCTCTAACCTGTTCATGGGGAGTGACGAACATACCACGCTCGTGAATGCAAACACTGGCAGCGCTTCCAGCGCCAGCCACATGCACCAGCAGCAACAGCAGCAG
A_tiles_P0CE41:1294	LLSSFSMNQLNGGTIPTVPSLTNITSQMGALPSLDRITTNQINLPDPSRDEAF	HAP1	P0CE41	1294	0.0134354	0.907752	-0.299987	0.0147175	0.0118338	0.013925	0.893238	0.987352	0.84813	0.00728416	0.650097	-1.75717	0.00921703	0.00575662	0.724908	0.583006	CTGCTGTCCAGCTTTTCCATGAACCAGCTGAACGGGGGCACTATACCAACAGTGCCCTCTTTGACGAATATTACCAGTCAAATGGGAGCCCTCCCTTCACTGGATAGAATCACCACCAATCAGATCAACCTCCCCGACCCGAGCCGCGACGAGGCTTTC
A_tiles_P0CE41:13	ASMTQSSVSRSPNMHTATTPGANTSSNSPPLHMSSDSSKIKRKRNRIPLSCTI	HAP1	P0CE41	13	0.0135713	0.916938	-0.26878	0.0153537	0.0113137	0.0143897	0.931848	0.943962	0.876434	0.00927572	0.82784	-0.770938	0.00988491	0.00870409	0.777435	0.881512	GCCTCCATGACCCAGAGCTCAGTGTCTAGGAGCCCCAACATGCACACCGCAACTACACCTGGCGCTAATACGTCCAGTAACTCTCCGCCCCTCCATATGTCCAGCGACAGTAGCAAAATTAAGAGAAAGCGGAACCGCATCCCACTGTCCTGCACCATC
A_tiles_P0CE41:1307	TIPTVPSLTNITSQMGALPSLDRITTNQINLPDPSRDEAFDNSIKQMTPMTSA	HAP1	P0CE41	1307	0.01956	1.32156	0.864187	0.0221704	0.0153429	0.0220001	1.34557	1.28014	1.33996	0.0119672	1.06805	0.268637	0.0123345	0.0116109	0.970094	1.1759	ACTATCCCGACCGTGCCTAGTCTGACGAACATTACCTCCCAGATGGGCGCACTGCCTTCTTTGGACCGCATCACAACTAACCAAATAAATCTCCCAGACCCCTCAAGAGATGAGGCTTTCGACAACTCCATCAAGCAGATGACACCCATGACCAGCGCC
A_tiles_P0CE41:1320	QMGALPSLDRITTNQINLPDPSRDEAFDNSIKQMTPMTSAFMNANTTIPSSTL	HAP1	P0CE41	1320	0.0160043	1.08131	0.242315	0.0187097	0.0126775	0.0172825	1.13553	1.05775	1.05263	0.0106813	0.953288	-0.195199	0.0131134	0.00870035	1.03135	0.881134	CAGATGGGCGCCCTGCCGAGCTTGGACCGCATTACCACCAACCAAATAAATCTGCCCGATCCTAGTAGAGACGAGGCCTTTGACAATTCCATCAAGCAGATGACACCAATGACCTCTGCTTTCATGAACGCAAACACTACAATCCCCAGCTCCACGCTC
A_tiles_P0CE41:1333	NQINLPDPSRDEAFDNSIKQMTPMTSAFMNANTTIPSSTLNGNMNMNGAGTAN	HAP1	P0CE41	1333																	AACCAGATCAACCTGCCGGACCCTTCTAGAGATGAGGCATTTGACAACAGCATTAAGCAGATGACGCCCATGACATCAGCTTTCATGAATGCGAATACCACCATCCCAAGTTCCACTCTCAATGGCAACATGAACATGAATGGAGCCGGGACCGCCAAC
A_tiles_P0CE41:1346	FDNSIKQMTPMTSAFMNANTTIPSSTLNGNMNMNGAGTANTDTSANGSALSTL	HAP1	P0CE41	1346	0.0100505	0.679054	-1.1997	0.00936836	0.0099281	0.0109152	0.568586	0.828354	0.664814	0.00838842	0.74865	-1.18122	0.00947619	0.00742552	0.74529	0.752024	TTCGATAACTCCATCAAGCAGATGACTCCCATGACCAGTGCCTTTATGAACGCTAACACAACCATTCCTTCCAGCACCCTCAACGGCAATATGAATATGAATGGAGCAGGGACAGCCAACACTGACACGAGCGCGAACGGCTCTGCCCTGTCAACCCTG
A_tiles_P0CE41:1358	SAFMNANTTIPSSTLNGNMNMNGAGTANTDTSANGSALSTLTSPQGSDLASNS	HAP1	P0CE41	1358	0.00826479	0.558404	-1.80602	0.00962744	0.00699583	0.00838198	0.58431	0.583698	0.510523	0.00834448	0.744728	-1.20265	0.00794253	0.00876677	0.62467	0.88786	TCCGCCTTCATGAACGCCAACACCACAATCCCCTCATCCACGCTCAACGGCAACATGAATATGAATGGTGCTGGCACTGCAAACACCGATACCAGTGCTAATGGAAGCGCCTTGTCTACACTGACTTCTCCTCAGGGGAGCGACCTGGCGAGCAACTCC
A_tiles_P0CE41:1371	TLNGNMNMNGAGTANTDTSANGSALSTLTSPQGSDLASNSATQYKPDLEDFLM	HAP1	P0CE41	1371	0.0242951	1.64148	1.53613	0.0242106	0.0217469	0.0272366	1.46939	1.81446	1.6589	0.0109117	0.973847	-0.108135	0.0119035	0.0100026	0.936192	1.01302	ACCCTGAACGGCAACATGAACATGAACGGGGCCGGCACCGCTAATACAGATACTTCTGCCAATGGATCAGCGCTCTCCACATTGACGAGTCCCCAGGGTTCCGATCTGGCAAGCAATAGCGCCACCCAGTACAAGCCTGACCTCGAGGACTTCCTGATG
A_tiles_P0CE41:1384	ANTDTSANGSALSTLTSPQGSDLASNSATQYKPDLEDFLMQNSNFNGLMINPS	HAP1	P0CE41	1384	0.0244917	1.65476	1.56111	0.0261523	0.0204218	0.0275076	1.58724	1.7039	1.67541	0.00738629	0.659212	-1.70036	0.00709412	0.00769049	0.557944	0.77886	GCCAACACGGACACCTCCGCCAATGGCAGTGCTCTGTCCACTCTCACAAGCCCTCAAGGATCTGATCTGGCGAGCAATAGCGCAACCCAGTACAAGCCCGATCTGGAGGACTTTTTGATGCAGAATTCCAACTTCAACGGGCTCATGATCAACCCATCA
A_tiles_P0CE41:1397	TLTSPQGSDLASNSATQYKPDLEDFLMQNSNFNGLMINPSSLVEVVGGYNDPN	HAP1	P0CE41	1397	0.0367472	2.4828	2.81869	0.0368689	0.0280672	0.0479529	2.23765	2.3418	2.92067	0.0096892	0.864742	-0.592985	0.011802	0.00795461	0.928216	0.805608	ACCCTGACTTCCCCGCAAGGCAGCGACCTGGCTTCAAATTCTGCCACACAGTATAAGCCAGATCTCGAGGACTTCCTGATGCAGAACAGCAACTTTAACGGCTTGATGATCAATCCTTCCAGTCTCGTGGAAGTCGTGGGAGGGTACAATGACCCCAAC
A_tiles_P0CE41:1410	SATQYKPDLEDFLMQNSNFNGLMINPSSLVEVVGGYNDPNNLGRNDAVDFLPV	HAP1	P0CE41	1410	0.0261513	1.76689	1.76433	0.027277	0.0196496	0.0333678	1.6555	1.63947	2.03234	0.00848874	0.757603	-1.13271	0.0103992	0.00692927	0.817883	0.701767	TCCGCTACCCAGTACAAGCCCGATTTGGAGGACTTCCTGATGCAGAATAGCAACTTTAACGGCCTCATGATCAACCCAAGTTCTCTGGTGGAAGTGGTGGGAGGTTATAATGATCCTAACAATCTGGGGAGAAACGACGCCGTCGACTTCCTCCCGGTT
A_tiles_P0CE41:142	YNTPESSNLFMGSDEHTTLVNANTGSASSASHMHQQQQQQQQQEQQQDFSRSA	HAP1	P0CE41	142	0.0119457	0.8071	-0.664256	0.0121019	0.0110031	0.0128016	0.734489	0.918045	0.77971	0.00960238	0.856994	-0.629712	0.0118134	0.00780515	0.929113	0.790472	TACAACACCCCTGAGTCCTCCAACCTCTTCATGGGATCCGATGAGCACACAACCCTGGTGAACGCCAATACTGGCAGCGCATCTTCAGCCAGCCACATGCATCAGCAGCAGCAACAACAGCAACAGCAGGAACAGCAGCAGGACTTTAGTCGCAGCGCT
A_tiles_P0CE41:1423	MQNSNFNGLMINPSSLVEVVGGYNDPNNLGRNDAVDFLPVDNVEIDGVGIKIN	HAP1	P0CE41	1423	0.0235239	1.58937	1.43614	0.0219213	0.0187121	0.031735	1.33045	1.56125	1.93289	0.0079099	0.705942	-1.42089	0.00865237	0.00723114	0.680498	0.732338	ATGCAGAACTCCAACTTTAACGGGTTGATGATTAACCCCTCTAGCCTCGTGGAAGTGGTCGGTGGGTACAATGACCCAAATAATCTGGGCAGAAATGATGCCGTTGATTTCCTGCCTGTGGACAACGTGGAGATAGACGGAGTCGGCATCAAGATCAAC
A_tiles_P0CE41:1436	SSLVEVVGGYNDPNNLGRNDAVDFLPVDNVEIDGVGIKINYHLLTSIYVTSIL	HAP1	P0CE41	1436	0.0177379	1.19845	0.561104	0.0184693	0.0151598	0.0199325	1.12094	1.26486	1.21403	0.0112937	1.00794	0.0322573	0.0121056	0.0105362	0.952088	1.06706	AGCAGTCTGGTCGAGGTGGTGGGCGGTTATAACGACCCCAACAATCTGGGAAGAAATGATGCCGTGGATTTCCTCCCTGTCGACAACGTGGAAATAGACGGCGTTGGGATTAAGATCAACTACCACCTGTTGACATCCATCTACGTGACCTCTATCCTC
A_tiles_P0CE41:1449	NNLGRNDAVDFLPVDNVEIDGVGIKINYHLLTSIYVTSILSYTVLEDDANDEK	HAP1	P0CE41	1449	0.033645	2.2732	2.54531	0.0470112	0.0233194	0.0347411	2.85321	1.94566	2.11598	0.0137923	1.23094	0.847815	0.015875	0.0119829	1.24855	1.21358	AACAACCTGGGCCGCAACGACGCTGTGGATTTCCTCCCCGTTGATAATGTCGAGATTGACGGAGTGGGGATAAAAATCAACTACCACCTGCTCACTTCTATCTACGTGACCTCCATCTTGAGCTATACAGTCCTGGAAGACGATGCCAATGACGAGAAG
A_tiles_P0CE41:155	DEHTTLVNANTGSASSASHMHQQQQQQQQQEQQQDFSRSANANANSSSLSISN	HAP1	P0CE41	155	0.00935828	0.632285	-1.42088	0.00952302	0.00772853	0.0111357	0.577972	0.644832	0.678244	0.00840921	0.750505	-1.17112	0.010102	0.00700006	0.794512	0.708935	GACGAGCACACTACCCTCGTGAACGCGAACACAGGCTCCGCTAGCAGCGCCTCCCACATGCATCAGCAGCAGCAACAACAACAGCAACAGGAACAGCAGCAGGATTTCAGTCGCTCTGCAAATGCCAATGCCAACAGTTCTAGCCTGTCCATCTCAAAC
A_tiles_P0CE41:168	ASSASHMHQQQQQQQQQEQQQDFSRSANANANSSSLSISNKYDNDELDLTKDF	HAP1	P0CE41	168	0.0122602	0.828353	-0.583694	0.0125453	0.0114362	0.012845	0.761398	0.954182	0.782355	0.00963542	0.859942	-0.615698	0.0110459	0.00840506	0.868745	0.851228	GCCTCCTCTGCGAGTCACATGCATCAGCAACAGCAGCAGCAACAACAGCAGGAACAGCAACAGGATTTTAGCAGATCAGCTAATGCCAACGCAAATTCCTCCAGCCTGAGCATCTCTAACAAATACGACAACGATGAGCTCGACCTGACAAAGGACTTC
A_tiles_P0CE41:181	QQQQEQQQDFSRSANANANSSSLSISNKYDNDELDLTKDFDLLHIKSNGTIHL	HAP1	P0CE41	181	0.0207776	1.40382	1.05136	0.0191617	0.021314	0.0219628	1.16296	1.77834	1.33769	0.0081034	0.723212	-1.32227	0.00825498	0.00795461	0.649244	0.805608	CAGCAGCAACAGGAACAGCAGCAAGATTTTAGCAGATCCGCAAATGCCAACGCTAACTCATCTAGTCTGTCCATTTCCAACAAGTACGACAACGACGAGTTGGACCTGACAAAAGACTTCGATCTCCTGCATATCAAGAGCAATGGCACCATCCACCTC
A_tiles_P0CE41:194	ANANANSSSLSISNKYDNDELDLTKDFDLLHIKSNGTIHLGATHWLSIMKGDP	HAP1	P0CE41	194	0.0201244	1.35969	0.95235	0.0246274	0.0145362	0.0227665	1.49469	1.21283	1.38664	0.0109278	0.975286	-0.102111	0.0114513	0.0104283	0.900628	1.05613	GCAAACGCCAACGCCAACTCATCTAGTCTGTCCATCAGCAATAAATACGACAATGACGAGCTGGACCTGACCAAGGATTTCGATCTGTTGCACATTAAGTCCAACGGGACAATACATCTCGGAGCTACTCACTGGCTCAGCATCATGAAGGGCGACCCC
A_tiles_P0CE41:207	NKYDNDELDLTKDFDLLHIKSNGTIHLGATHWLSIMKGDPYLKLLWGHIFAMR	HAP1	P0CE41	207	0.0180968	1.2227	0.623196	0.0204477	0.0154461	0.0187648	1.24102	1.28875	1.14291	0.0127479	1.13772	0.526494	0.0147946	0.0109843	1.16358	1.11245	AACAAGTACGACAACGACGAGTTGGACCTGACTAAGGACTTTGATCTCCTGCACATCAAAAGCAATGGCACCATTCACCTCGGTGCCACACATTGGCTGTCCATAATGAAAGGGGATCCCTATCTGAAGCTCCTGTGGGGACACATCTTCGCTATGCGC
A_tiles_P0CE41:220	FDLLHIKSNGTIHLGATHWLSIMKGDPYLKLLWGHIFAMREKLNEWYYQKNSY	HAP1	P0CE41	220	0.0127007	0.858113	-0.474293	0.0135817	0.0103944	0.0145121	0.824301	0.867258	0.883891	0.0163775	1.46166	1.54881	0.0157647	0.017014	1.23988	1.72311	TTCGACCTGCTGCACATCAAATCTAATGGCACCATCCACCTCGGGGCTACACATTGGTTGTCCATTATGAAAGGAGATCCCTATCTGAAGCTCCTGTGGGGTCACATATTTGCCATGAGAGAAAAGCTGAACGAGTGGTACTACCAGAAGAACAGCTAC
A_tiles_P0CE41:233	LGATHWLSIMKGDPYLKLLWGHIFAMREKLNEWYYQKNSYSKLKSSKCPINHA	HAP1	P0CE41	233	0.0133846	0.90432	-0.311727	0.0158175	0.0110079	0.0137712	0.959997	0.91845	0.838768	0.0113165	1.00998	0.040513	0.0127894	0.0100133	1.00587	1.0141	CTGGGCGCCACCCACTGGCTGTCTATTATGAAGGGAGACCCTTATCTCAAATTGCTGTGGGGGCATATCTTCGCAATGAGGGAAAAACTCAACGAGTGGTACTACCAGAAGAACAGCTACAGTAAGCTGAAGTCCTCAAAATGCCCCATCAATCACGCT
A_tiles_P0CE41:246	PYLKLLWGHIFAMREKLNEWYYQKNSYSKLKSSKCPINHAQAPPSAAAAATRK	HAP1	P0CE41	246	0.0153077	1.03425	0.10439	0.0205783	0.0108102	0.0161246	1.24894	0.901948	0.982101	0.0107585	0.960173	-0.165835	0.00984969	0.0117511	0.774666	1.1901	CCCTACTTGAAACTGCTGTGGGGCCATATCTTCGCTATGCGCGAAAAACTCAACGAGTGGTATTACCAGAAGAACTCTTACAGCAAGCTGAAGTCCAGTAAATGCCCTATTAATCACGCTCAGGCCCCGCCATCAGCAGCCGCGGCCGCCACCCGGAAG
A_tiles_P0CE41:259	REKLNEWYYQKNSYSKLKSSKCPINHAQAPPSAAAAATRKCPVDHSAFSSGMV	HAP1	P0CE41	259																	CGCGAAAAGCTGAACGAGTGGTACTATCAGAAGAACAGCTACAGCAAGCTCAAGTCCTCTAAATGCCCGATCAATCATGCTCAGGCGCCACCCTCCGCAGCCGCCGCTGCCACCAGAAAATGTCCTGTGGACCACTCAGCCTTCAGTTCCGGCATGGTC
A_tiles_P0CE41:26	MHTATTPGANTSSNSPPLHMSSDSSKIKRKRNRIPLSCTICRKRKVKCDKLRP	HAP1	P0CE41	26	0.10753			0.116555	0.114866	0.0928686	7.07397	9.58386	5.65637	0.0138429	1.23545	0.862758	0.0146459	0.0130839	1.15188	1.32508	ATGCACACCGCCACCACACCCGGCGCTAACACGTCATCCAATAGCCCGCCCCTCCATATGTCTAGTGATTCCAGCAAAATCAAGCGCAAAAGGAACCGCATTCCACTGTCCTGTACTATCTGCAGAAAACGGAAGGTGAAGTGCGACAAGCTGCGGCCT
A_tiles_P0CE41:272	YSKLKSSKCPINHAQAPPSAAAAATRKCPVDHSAFSSGMVAPKEETPLPRKCP	HAP1	P0CE41	272	0.0145285	0.981606	-0.0575438	0.0180903	0.0123482	0.0137281	1.09794	1.03028	0.83614	0.0118674	1.05914	0.23446	0.0120894	0.0116495	0.950816	1.17981	TACTCCAAGCTGAAGTCCAGCAAGTGCCCCATCAACCACGCCCAGGCCCCACCTAGCGCTGCAGCTGCCGCGACAAGAAAATGTCCCGTCGACCATTCAGCATTCTCTAGTGGCATGGTGGCCCCAAAAGAAGAGACCCCGCTCCCTAGGAAGTGCCCC
A_tiles_P0CE41:285	AQAPPSAAAAATRKCPVDHSAFSSGMVAPKEETPLPRKCPVDHTMFSSGMIPP	HAP1	P0CE41	285	0.0095271	0.643691	-1.36546	0.0108379	0.00712942	0.0111914	0.657775	0.594845	0.681634	0.0101563	0.906427	-0.400881	0.0124346	0.00829536	0.977969	0.840118	GCCCAGGCCCCGCCATCCGCCGCAGCGGCCGCTACCAGAAAGTGCCCAGTCGATCATTCTGCATTTTCAAGTGGAATGGTGGCTCCTAAGGAAGAGACTCCCCTGCCCAGGAAATGTCCTGTGGACCACACAATGTTCTCCAGCGGCATGATCCCGCCC
A_tiles_P0CE41:298	KCPVDHSAFSSGMVAPKEETPLPRKCPVDHTMFSSGMIPPREDTSSQKRCPVD	HAP1	P0CE41	298	0.00789162	0.533191	-1.94923	0.0080552	0.00724985	0.00841576	0.488887	0.604893	0.51258	0.00682421	0.609047	-2.02332	0.00647183	0.00719578	0.509002	0.728758	AAGTGCCCCGTGGACCACTCAGCCTTCAGTAGCGGCATGGTCGCTCCAAAAGAAGAGACTCCTCTGCCAAGAAAATGCCCCGTTGATCATACCATGTTTTCCTCTGGAATGATCCCTCCGAGGGAGGACACATCCAGCCAGAAGCGCTGTCCCGTGGAC
A_tiles_P0CE41:310	MVAPKEETPLPRKCPVDHTMFSSGMIPPREDTSSQKRCPVDHTMYSAGMMPPK	HAP1	P0CE41	310	0.00993608	0.671324	-1.23518	0.00990895	0.00838361	0.0118083	0.601395	0.699489	0.71921	0.00820633	0.732399	-1.27077	0.00853964	0.00788603	0.671632	0.798663	ATGGTGGCTCCCAAGGAGGAGACTCCCCTGCCTCGCAAATGCCCAGTCGATCATACAATGTTCTCCAGTGGCATGATCCCACCGAGGGAAGACACGTCATCTCAGAAAAGATGTCCCGTGGACCACACCATGTACAGCGCCGGGATGATGCCTCCCAAG
A_tiles_P0CE41:323	CPVDHTMFSSGMIPPREDTSSQKRCPVDHTMYSAGMMPPKDETPSPFSTKAMI	HAP1	P0CE41	323	0.0123091	0.831658	-0.571352	0.0155364	0.00797423	0.0150537	0.942938	0.665332	0.91688	0.00929823	0.829848	-0.761052	0.00984868	0.00877854	0.774586	0.889053	TGCCCCGTGGACCACACTATGTTTTCCAGTGGCATGATCCCTCCACGCGAAGATACATCAAGCCAGAAGAGATGTCCAGTCGATCATACCATGTACTCTGCTGGAATGATGCCTCCCAAAGACGAGACGCCCTCCCCGTTCAGCACCAAGGCCATGATT
A_tiles_P0CE41:336	PPREDTSSQKRCPVDHTMYSAGMMPPKDETPSPFSTKAMIDHNKHTMNPPQSK	HAP1	P0CE41	336	0.00898489	0.607057	-1.54708	0.0073616	0.00970927	0.010148	0.446791	0.810095	0.618086	0.00968033	0.86395	-0.596725	0.00929742	0.010079	0.73123	1.02076	CCGCCCCGCGAGGACACGTCCTCCCAGAAGAGATGCCCCGTGGATCATACAATGTACAGTGCTGGCATGATGCCACCTAAAGATGAAACCCCTTCTCCCTTCTCAACTAAAGCCATGATCGACCACAATAAGCACACCATGAACCCACCCCAGAGCAAG
A_tiles_P0CE41:349	VDHTMYSAGMMPPKDETPSPFSTKAMIDHNKHTMNPPQSKCPVDHRNYMKDYP	HAP1	P0CE41	349	0.0104977	0.709268	-1.06476	0.00918035	0.00927424	0.0135876	0.557174	0.773798	0.827584	0.0079337	0.708067	-1.40863	0.00943786	0.00666926	0.742276	0.675434	GTCGACCACACTATGTATTCCGCCGGCATGATGCCCCCCAAAGATGAGACACCTAGTCCATTCAGCACGAAGGCTATGATCGATCACAACAAGCATACCATGAATCCACCTCAGTCTAAGTGCCCCGTGGACCACAGAAACTACATGAAAGACTACCCG
A_tiles_P0CE41:362	KDETPSPFSTKAMIDHNKHTMNPPQSKCPVDHRNYMKDYPSDMANSSSNPASR	HAP1	P0CE41	362																	AAGGACGAGACCCCTAGCCCCTTCTCTACTAAGGCCATGATCGATCACAATAAGCACACAATGAATCCACCTCAGTCCAAATGCCCCGTGGATCATAGGAACTATATGAAAGACTACCCGAGTGACATGGCAAACTCCTCAAGCAACCCCGCTTCCCGC
A_tiles_P0CE41:375	IDHNKHTMNPPQSKCPVDHRNYMKDYPSDMANSSSNPASRCPIDHSSMKNTAA	HAP1	P0CE41	375	0.00994986	0.672254	-1.23089	0.00921222	0.0125911	0.00849226	0.559109	1.05054	0.51724	0.0112479	1.00385	0.0156893	0.0150371	0.00841353	1.18265	0.852086	ATTGACCACAACAAGCACACCATGAATCCCCCTCAGTCCAAATGCCCTGTGGATCATCGGAACTATATGAAGGACTACCCATCTGATATGGCCAACTCATCCAGCAATCCGGCTAGTCGCTGTCCCATCGACCACTCCAGCATGAAGAACACAGCAGCC
A_tiles_P0CE41:388	KCPVDHRNYMKDYPSDMANSSSNPASRCPIDHSSMKNTAALPASTHNTIPHHQ	HAP1	P0CE41	388	0.00798868	0.539749	-1.91134	0.00838132	0.00671523	0.00905842	0.50868	0.560287	0.551723	0.00928515	0.828681	-0.766795	0.00945883	0.00911466	0.743925	0.923093	AAGTGCCCCGTGGACCACCGCAACTACATGAAAGACTATCCTAGCGATATGGCGAATTCTTCCAGCAACCCGGCATCCAGATGTCCAATTGACCATTCAAGTATGAAGAATACTGCTGCCCTGCCCGCCAGCACCCATAACACAATCCCTCACCACCAG
A_tiles_P0CE41:39	NSPPLHMSSDSSKIKRKRNRIPLSCTICRKRKVKCDKLRPHCQQCTKTGVAHL	HAP1	P0CE41	39	0.061447			0.067995	0.0626946	0.0544246	4.12676	5.23094	3.31485	0.0139786	1.24756	0.902562	0.0161013	0.0121358	1.26634	1.22906	AACAGTCCGCCCCTCCACATGTCCTCTGACAGCAGCAAGATCAAGAGAAAGCGGAATCGCATTCCTCTGTCCTGCACAATCTGTCGCAAAAGGAAGGTCAAATGTGATAAACTGCGGCCACATTGCCAGCAGTGCACTAAGACCGGCGTGGCCCACTTG
A_tiles_P0CE41:401	PSDMANSSSNPASRCPIDHSSMKNTAALPASTHNTIPHHQPQSGSHARSHPAQ	HAP1	P0CE41	401	0.0094449	0.638138	-1.39232	0.00961674	0.00771039	0.0113629	0.58366	0.643318	0.692082	0.0105794	0.944192	-0.234321	0.0120282	0.00930511	0.946007	0.942381	CCCTCCGACATGGCCAACAGCTCAAGCAACCCTGCCTCTCGCTGCCCCATTGATCATTCTAGTATGAAGAACACAGCTGCACTGCCAGCTAGCACCCACAATACTATCCCTCATCACCAACCCCAGTCCGGCTCCCACGCGCGGAGTCACCCGGCCCAG
A_tiles_P0CE41:414	RCPIDHSSMKNTAALPASTHNTIPHHQPQSGSHARSHPAQSRKHDSYMTESEV	HAP1	P0CE41	414	0.0105121	0.710243	-1.0605	0.00965473	0.00831914	0.0144628	0.585966	0.694109	0.880889	0.0117653	1.05003	0.199185	0.0150812	0.00917839	1.18612	0.929548	CGCTGCCCCATTGACCACTCATCTATGAAGAACACCGCCGCGCTGCCAGCATCCACGCATAATACAATCCCTCATCACCAACCCCAGAGTGGCAGCCACGCTAGATCCCACCCGGCCCAGAGCAGGAAACACGATTCCTACATGACTGAAAGCGAGGTG
A_tiles_P0CE41:427	ALPASTHNTIPHHQPQSGSHARSHPAQSRKHDSYMTESEVLATLCEMLPPKRV	HAP1	P0CE41	427	0.0171323	1.15753	0.453436	0.0197476	0.0155163	0.0164114	1.19852	1.29461	0.999574	0.00937982	0.83713	-0.725401	0.0126404	0.00696028	0.994155	0.704907	GCGCTGCCCGCCAGTACGCACAACACTATCCCTCACCACCAGCCTCAGTCAGGCTCCCATGCTAGAAGCCACCCAGCACAATCTCGCAAACATGACAGCTACATGACAGAATCCGAGGTGCTGGCCACCCTCTGCGAGATGTTGCCCCCGAAGAGGGTC
A_tiles_P0CE41:440	QPQSGSHARSHPAQSRKHDSYMTESEVLATLCEMLPPKRVIALFIEKFFKHLY	HAP1	P0CE41	440	0.0162313	1.09666	0.285983	0.020335	0.0128676	0.0163425	1.23418	1.07361	0.995376	0.0201851	1.80148	2.40178	0.0205627	0.0198145	1.61723	2.00672	CAGCCCCAGTCCGGCAGCCACGCTCGGAGTCACCCAGCACAAAGCAGGAAACATGACTCTTATATGACAGAGTCAGAGGTCCTGGCCACCCTCTGCGAAATGTTGCCTCCGAAACGCGTGATTGCCCTGTTTATCGAGAAGTTCTTCAAGCACCTGTAC
A_tiles_P0CE41:453	QSRKHDSYMTESEVLATLCEMLPPKRVIALFIEKFFKHLYPAIPILDEQNFKN	HAP1	P0CE41	453	0.0164644	1.11241	0.33018	0.0204604	0.0161673	0.0134924	1.24178	1.34892	0.821783	0.0211763	1.88994	2.59738	0.0194997	0.022997	1.53363	2.32903	CAGTCCCGGAAACACGATTCTTATATGACCGAGAGCGAAGTCCTCGCAACACTGTGCGAAATGCTCCCACCTAAACGCGTGATTGCCCTGTTCATAGAGAAGTTCTTTAAGCATTTGTACCCGGCTATCCCCATCCTGGACGAGCAGAATTTCAAGAAC
A_tiles_P0CE41:466	VLATLCEMLPPKRVIALFIEKFFKHLYPAIPILDEQNFKNHVNQMLSLSSMNP	HAP1	P0CE41	466	0.0102268	0.690963	-1.14581	0.0105276	0.00830073	0.0122396	0.638945	0.692574	0.745479	0.0128578	1.14754	0.561541	0.0128689	0.0128468	1.01213	1.30106	GTCCTGGCCACCCTGTGCGAGATGTTGCCCCCTAAACGCGTGATAGCTCTCTTTATCGAGAAGTTCTTCAAGCATCTGTACCCCGCAATCCCAATTCTGGACGAACAGAATTTCAAGAACCACGTGAACCAGATGCTGTCCCTCTCTAGCATGAACCCG
A_tiles_P0CE41:479	VIALFIEKFFKHLYPAIPILDEQNFKNHVNQMLSLSSMNPTVNNFGMSMPSSS	HAP1	P0CE41	479	0.0128951	0.871247	-0.427208	0.0146405	0.0112616	0.0130053	0.888561	0.939612	0.792116	0.0129535	1.15608	0.591795	0.014842	0.0113054	1.16731	1.14496	GTGATTGCCCTGTTCATCGAAAAGTTCTTTAAGCACCTGTACCCAGCTATACCTATCCTGGACGAGCAGAACTTCAAAAACCATGTCAACCAGATGTTGTCCCTCTCCTCAATGAATCCGACCGTGAATAACTTTGGCATGTCTATGCCCAGTAGCAGC
A_tiles_P0CE41:492	YPAIPILDEQNFKNHVNQMLSLSSMNPTVNNFGMSMPSSSTLENQPITQINLP	HAP1	P0CE41	492	0.0113872	0.769365	-0.812671	0.012092	0.00960616	0.0127115	0.733891	0.801492	0.774222	0.00716976	0.639886	-1.82177	0.00791619	0.0064937	0.622598	0.657654	TACCCCGCCATCCCAATCCTGGACGAACAGAACTTCAAGAATCACGTCAACCAGATGCTCTCTTTGTCAAGCATGAACCCCACCGTGAATAATTTTGGCATGAGCATGCCTTCCAGTTCCACTCTGGAGAACCAACCTATAACACAGATTAACCTGCCG
A_tiles_P0CE41:505	NHVNQMLSLSSMNPTVNNFGMSMPSSSTLENQPITQINLPKLSDSCNLGILII	HAP1	P0CE41	505	0.0263861	1.78276	1.79204	0.0328254	0.0226671	0.02469	1.99224	1.89123	1.5038	0.0112594	1.00488	0.0198516	0.0133828	0.00947287	1.05254	0.959372	AACCACGTGAACCAGATGCTGTCTCTCAGTAGCATGAACCCAACCGTCAATAATTTCGGGATGAGCATGCCTAGCTCCTCAACTCTGGAGAATCAGCCCATAACACAAATTAACTTGCCGAAGCTGTCCGACTCCTGCAACCTCGGCATCCTGATCATC
A_tiles_P0CE41:518	PTVNNFGMSMPSSSTLENQPITQINLPKLSDSCNLGILIIILRLTWLSIPSNS	HAP1	P0CE41	518	0.0172875	1.16802	0.481385	0.0197552	0.0152055	0.0171995	1.19898	1.26867	1.04757	0.0219163	1.95598	2.73753	0.0241992	0.0198487	1.90324	2.01019	CCCACCGTGAACAACTTCGGCATGTCTATGCCTTCATCCAGCACACTCGAGAATCAGCCGATTACGCAGATAAATCTGCCAAAGCTGAGTGACTCCTGCAACTTGGGAATCCTGATCATCATTCTGAGACTCACTTGGCTGAGCATCCCCTCCAACAGC
A_tiles_P0CE41:52	IKRKRNRIPLSCTICRKRKVKCDKLRPHCQQCTKTGVAHLCHYMEQTWAEEAE	HAP1	P0CE41	52	0.0222268	1.50173	1.26034	0.0237774	0.0211089	0.0218776	1.4431	1.76123	1.3325	0.0111687	0.996784	-0.0131434	0.0135283	0.00922064	1.06399	0.933827	ATCAAGCGCAAGAGGAACCGGATTCCCCTGTCCTGCACCATCTGCAGAAAACGGAAAGTCAAGTGTGACAAACTCCGCCCTCATTGTCAGCAATGCACTAAGACAGGCGTGGCACACCTGTGCCACTACATGGAACAGACCTGGGCCGAGGAGGCTGAG
A_tiles_P0CE41:530	SSTLENQPITQINLPKLSDSCNLGILIIILRLTWLSIPSNSCEVDLGEESGSF	HAP1	P0CE41	530	0.0124461	0.840914	-0.537045	0.0155048	0.00935125	0.0132975	0.941017	0.780224	0.809913	0.0114313	1.02022	0.0816916	0.0177883	0.00734614	1.39902	0.743985	TCCAGCACACTGGAGAACCAGCCTATCACTCAGATCAATTTGCCCAAGCTCTCCGATAGCTGTAACCTGGGGATACTGATCATTATTCTCAGACTGACCTGGCTCTCAATCCCAAGCAACTCTTGCGAAGTGGACCTGGGAGAGGAGAGTGGCTCCTTC
A_tiles_P0CE41:543	LPKLSDSCNLGILIIILRLTWLSIPSNSCEVDLGEESGSFLVPNESSNMSASA	HAP1	P0CE41	543																	CTGCCAAAGCTGAGTGACAGTTGCAACCTCGGAATCCTGATCATCATACTCCGCCTCACCTGGTTGTCTATTCCTTCCAATTCTTGTGAGGTCGATCTGGGCGAAGAGTCAGGGAGCTTCCTGGTGCCCAACGAGTCCAGCAACATGAGCGCTTCCGCC
A_tiles_P0CE41:556	IIILRLTWLSIPSNSCEVDLGEESGSFLVPNESSNMSASALTSMAKEESLLLK	HAP1	P0CE41	556	0.0189888	1.28296	0.772325	0.0229855	0.0154804	0.0192423	1.39504	1.29161	1.17199	0.0131607	1.17457	0.656544	0.0188317	0.00919752	1.48109	0.931485	ATCATAATCCTGCGCCTGACCTGGCTCAGCATTCCCTCCAACAGCTGCGAAGTCGACCTCGGAGAAGAGAGTGGCTCTTTCTTGGTGCCTAATGAGTCATCCAACATGTCCGCCTCTGCTCTGACAAGCATGGCAAAAGAGGAGAGTCTCCTGCTGAAG
A_tiles_P0CE41:569	NSCEVDLGEESGSFLVPNESSNMSASALTSMAKEESLLLKHETPVEALELCQK	HAP1	P0CE41	569	0.0113902	0.769569	-0.811848	0.0115314	0.0104484	0.0122649	0.699863	0.871761	0.747019	0.0100384	0.895911	-0.448496	0.00975657	0.0103285	0.767342	1.04602	AACTCCTGTGAGGTGGACCTGGGCGAGGAGTCAGGGAGCTTCCTCGTCCCAAATGAAAGCTCTAACATGTCCGCTAGCGCATTGACCAGTATGGCCAAAGAAGAATCCCTGCTGCTCAAGCACGAGACACCCGTGGAGGCCCTGGAGCTGTGCCAGAAG
A_tiles_P0CE41:582	FLVPNESSNMSASALTSMAKEESLLLKHETPVEALELCQKYLIKFDELSSISN	HAP1	P0CE41	582	0.0238575	1.61191	1.47979	0.0306012	0.0163158	0.0271974	1.85725	1.36131	1.65652	0.00869817	0.776294	-1.03326	0.011948	0.00633229	0.939695	0.641307	TTTCTGGTGCCCAACGAGAGCTCTAATATGAGTGCCTCCGCTTTGACAAGCATGGCAAAAGAGGAGTCACTGCTCCTGAAACACGAAACCCCTGTCGAAGCCCTCGAACTGTGCCAGAAGTACCTGATTAAGTTCGACGAGCTCTCCTCCATCAGCAAC
A_tiles_P0CE41:595	ALTSMAKEESLLLKHETPVEALELCQKYLIKFDELSSISNNNVNLTTVQFAIF	HAP1	P0CE41	595	0.00896763	0.605891	-1.55304	0.00961495	0.00945768	0.00793052	0.583552	0.789104	0.483026	0.00925764	0.826226	-0.778903	0.0101864	0.00841353	0.80115	0.852086	GCCCTGACCTCAATGGCAAAGGAGGAGAGTCTGCTGTTGAAACACGAGACTCCCGTGGAAGCTCTCGAACTGTGCCAGAAATACCTCATTAAGTTTGACGAGCTCAGCTCCATCTCTAACAACAATGTGAACCTGACGACAGTCCAGTTCGCCATCTTC
A_tiles_P0CE41:608	KHETPVEALELCQKYLIKFDELSSISNNNVNLTTVQFAIFYNFYMKSASNDLT	HAP1	P0CE41	608	0.0167533	1.13192	0.384091	0.0219153	0.0130659	0.0164215	1.33009	1.09016	1.00019	0.0113712	1.01485	0.0601591	0.0143552	0.00900742	1.12902	0.912233	AAACACGAGACCCCTGTGGAAGCTTTGGAGCTCTGCCAGAAGTATCTCATTAAGTTCGACGAGCTGTCTTCAATCTCCAACAATAACGTGAACCTGACTACGGTCCAGTTCGCCATCTTCTACAACTTTTACATGAAGAGCGCAAGTAATGATCTGACA
A_tiles_P0CE41:621	KYLIKFDELSSISNNNVNLTTVQFAIFYNFYMKSASNDLTTLTNTNNTGMANP	HAP1	P0CE41	621	0.0130277	0.880209	-0.395491	0.0128416	0.0119148	0.0144511	0.779381	0.994116	0.880177	0.00993094	0.886317	-0.49243	0.0112788	0.00874414	0.887065	0.885569	AAATATCTCATTAAGTTTGATGAGCTGAGTTCTATCTCCAATAACAACGTCAATCTGACCACCGTGCAGTTCGCAATCTTCTACAACTTCTACATGAAGAGCGCTTCAAACGACTTGACCACTCTGACGAACACAAACAATACAGGCATGGCCAATCCC
A_tiles_P0CE41:634	NNNVNLTTVQFAIFYNFYMKSASNDLTTLTNTNNTGMANPGHDSESHQILLSN	HAP1	P0CE41	634	0.0167536	1.13194	0.384144	0.0177815	0.0151427	0.0174643	1.0792	1.26343	1.0637	0.01038	0.926398	-0.311952	0.0121329	0.0088804	0.954241	0.899369	AATAACAACGTGAACCTGACCACCGTCCAGTTTGCAATCTTCTATAACTTCTACATGAAGTCTGCCAGTAACGACTTGACCACTCTGACAAACACGAATAATACAGGAATGGCTAATCCCGGCCATGATAGCGAGTCCCACCAGATTCTCCTGTCAAAC
A_tiles_P0CE41:647	FYNFYMKSASNDLTTLTNTNNTGMANPGHDSESHQILLSNITQMAFSCGLHRD	HAP1	P0CE41	647	0.0208867	1.41119	1.0676	0.0203211	0.0190082	0.0235896	1.23333	1.58596	1.43678	0.00935983	0.835346	-0.734105	0.0112917	0.0077585	0.888077	0.785747	TTCTACAACTTCTATATGAAGTCCGCTTCCAACGATCTGACCACACTCACGAACACCAATAATACTGGCATGGCAAATCCCGGACATGACAGTGAGTCACACCAGATTTTGCTGTCTAACATCACCCAGATGGCCTTTAGCTGCGGGCTGCACCGCGAC
A_tiles_P0CE41:65	ICRKRKVKCDKLRPHCQQCTKTGVAHLCHYMEQTWAEEAEKELLKDNELKKLR	HAP1	P0CE41	65	0.0215929	1.45891	1.17066	0.0287697	0.0197078	0.0177566	1.74609	1.64432	1.0815	0.0102044	0.910721	-0.381594	0.0107666	0.0096715	0.846783	0.979488	ATCTGCCGCAAGAGGAAGGTGAAGTGCGACAAACTCAGACCTCACTGCCAACAGTGTACCAAAACTGGCGTCGCACATTTGTGTCACTACATGGAACAGACATGGGCTGAAGAGGCCGAGAAAGAGCTGCTCAAGGATAACGAGCTGAAGAAGCTGCGG
A_tiles_P0CE41:660	TTLTNTNNTGMANPGHDSESHQILLSNITQMAFSCGLHRDPDNFPQLNATIPA	HAP1	P0CE41	660	0.0169323	1.14402	0.41703	0.01636	0.0138885	0.0213653	0.992921	1.15879	1.3013	0.0090794	0.810318	-0.858231	0.0098423	0.00837563	0.774084	0.848248	ACCACGCTGACCAACACAAACAATACTGGCATGGCCAATCCTGGACATGACAGTGAGTCTCACCAGATTCTGTTGTCCAACATCACACAAATGGCATTTAGCTGCGGGCTGCACAGAGATCCAGACAATTTCCCGCAGCTCAACGCTACCATCCCCGCC
A_tiles_P0CE41:673	PGHDSESHQILLSNITQMAFSCGLHRDPDNFPQLNATIPATSQDVSNNGSKKA	HAP1	P0CE41	673	0.012159	0.821512	-0.609399	0.0128007	0.0108625	0.0129279	0.7769	0.906319	0.787399	0.0103879	0.927102	-0.308855	0.0106763	0.0101073	0.839678	1.02363	CCCGGGCACGACAGTGAGTCACATCAGATCTTGCTGTCCAATATTACCCAGATGGCATTCTCTTGCGGACTGCACAGAGATCCAGATAACTTTCCTCAACTCAATGCTACTATCCCGGCCACAAGCCAGGACGTGTCCAACAACGGCAGCAAAAAGGCC
A_tiles_P0CE41:686	NITQMAFSCGLHRDPDNFPQLNATIPATSQDVSNNGSKKANPSTNPTLNNNMS	HAP1	P0CE41	686	0.012174	0.822529	-0.605564	0.0115266	0.0121571	0.0128757	0.699574	1.01433	0.784221	0.00951454	0.849154	-0.66721	0.0102805	0.00880568	0.808546	0.891802	AACATCACCCAGATGGCCTTCTCTTGCGGCCTGCACAGAGACCCAGACAATTTTCCTCAACTGAATGCAACGATTCCGGCCACTTCCCAGGATGTGTCAAATAACGGAAGTAAAAAGGCTAACCCCTCCACAAACCCCACCCTCAATAACAACATGAGC
A_tiles_P0CE41:699	DPDNFPQLNATIPATSQDVSNNGSKKANPSTNPTLNNNMSAATTNSSSRSGSA	HAP1	P0CE41	699	0.00951596	0.642938	-1.36909	0.00885588	0.00920206	0.010574	0.537482	0.767777	0.644034	0.0100329	0.895419	-0.450737	0.0113846	0.00884176	0.895383	0.895455	GACCCGGACAACTTCCCACAGCTCAACGCCACTATCCCCGCGACCAGCCAGGATGTGTCTAATAATGGCTCCAAGAAAGCAAACCCCAGTACCAACCCTACCCTGAACAATAATATGTCTGCCGCCACGACAAACTCAAGCAGCCGCTCCGGGTCCGCT
A_tiles_P0CE41:712	ATSQDVSNNGSKKANPSTNPTLNNNMSAATTNSSSRSGSADSRSGSNPVNKKE	HAP1	P0CE41	712	0.00885669	0.598395	-1.59163	0.0107702	0.00656925	0.00981918	0.653664	0.548107	0.598059	0.0128368	1.14566	0.554865	0.0155294	0.0106111	1.22137	1.07465	GCCACGTCCCAGGATGTCAGCAACAACGGCTCCAAGAAAGCCAATCCCAGCACCAATCCTACTCTGAACAACAATATGAGCGCTGCAACAACCAATTCAAGTTCCCGCTCTGGATCTGCGGACAGTAGAAGCGGGTCCAACCCAGTGAACAAGAAGGAG
A_tiles_P0CE41:724	KANPSTNPTLNNNMSAATTNSSSRSGSADSRSGSNPVNKKENQVSIERFKHTW	HAP1	P0CE41	724	0.0109792	0.741803	-0.925746	0.0141364	0.00612042	0.0152966	0.857968	0.510659	0.931675	0.00772571	0.689504	-1.51703	0.00873123	0.00683599	0.6867	0.69232	AAGGCAAACCCCTCCACCAACCCTACGCTGAACAATAATATGAGCGCCGCCACTACAAATAGCTCCTCTAGGAGCGGATCAGCTGACAGTAGAAGTGGCTCTAACCCAGTGAACAAAAAAGAGAACCAGGTCTCCATCGAACGCTTCAAGCACACCTGG
A_tiles_P0CE41:737	MSAATTNSSSRSGSADSRSGSNPVNKKENQVSIERFKHTWRKIWYYIVSMDVN	HAP1	P0CE41	737	0.0123576	0.83493	-0.559183	0.0225605	0.00804398	0.0103987	1.36925	0.671152	0.633355	0.00781256	0.791222	-0.955539		0.00781256		0.791222	ATGTCCGCCGCAACCACTAATTCCAGCAGTCGGTCAGGCAGTGCTGATTCTAGAAGCGGATCTAACCCCGTGAATAAGAAAGAGAACCAGGTCTCCATTGAACGCTTCAAGCACACATGGAGGAAGATCTGGTATTACATCGTTAGCATGGACGTGAAC
A_tiles_P0CE41:750	SADSRSGSNPVNKKENQVSIERFKHTWRKIWYYIVSMDVNQSLSLGSPRLLRN	HAP1	P0CE41	750	0.0115358	0.779407	-0.772476	0.0101014	0.0108425	0.0140164	0.613072	0.904643	0.853697	0.0108427	0.967691	-0.134012	0.00945883	0.0124291	0.743925	1.25876	TCCGCCGACTCCCGCTCCGGCTCTAACCCCGTGAACAAGAAGGAAAATCAGGTGAGTATTGAGCGCTTCAAACACACCTGGCGGAAGATCTGGTATTACATCGTTAGCATGGATGTCAATCAGTCATTGAGCCTGGGGAGCCCTAGGCTCCTGAGAAAC
A_tiles_P0CE41:763	KENQVSIERFKHTWRKIWYYIVSMDVNQSLSLGSPRLLRNLRDFSDTKLPSAS	HAP1	P0CE41	763																	AAGGAAAACCAGGTGTCTATCGAGCGCTTCAAGCACACCTGGAGAAAGATCTGGTACTATATTGTGTCCATGGACGTCAACCAGAGTCTGAGCCTGGGCTCACCTCGCCTCTTGAGGAATCTCCGGGATTTTTCCGACACAAAACTGCCCTCCGCCAGC
A_tiles_P0CE41:776	WRKIWYYIVSMDVNQSLSLGSPRLLRNLRDFSDTKLPSASRIDYVRDIKELII	HAP1	P0CE41	776	0.0111725	0.754862	-0.871655	0.0102078	0.0120309	0.0113559	0.619533	1.0038	0.691658	0.012646	1.12863	0.493751	0.0127205	0.0125719	1.00045	1.27323	TGGCGGAAGATCTGGTACTACATTGTGAGTATGGACGTGAACCAGAGCCTCAGCCTGGGCTCTCCCAGATTGCTCCGGAATCTGCGCGATTTCTCAGATACCAAACTGCCTTCCGCCTCCAGGATTGACTATGTCCGCGACATAAAGGAGCTGATCATC
A_tiles_P0CE41:78	PHCQQCTKTGVAHLCHYMEQTWAEEAEKELLKDNELKKLRERVKSLEKTLSKV	HAP1	P0CE41	78	0.0212189	1.43364	1.11651	0.025651	0.0186394	0.0199818	1.55681	1.55518	1.21704	0.00980895	0.875429	-0.542867	0.0108841	0.00883997	0.856024	0.895274	CCCCACTGCCAGCAGTGCACCAAGACTGGCGTGGCCCACCTCTGTCATTACATGGAACAAACATGGGCAGAGGAAGCTGAAAAGGAGCTGCTCAAAGACAACGAGCTGAAAAAATTGCGCGAGAGAGTCAAGTCCCTGGAGAAGACGCTGAGCAAGGTG
A_tiles_P0CE41:789	NQSLSLGSPRLLRNLRDFSDTKLPSASRIDYVRDIKELIIVKNFTLFFQIDLC	HAP1	P0CE41	789	0.00890019	0.601334	-1.57644	0.00717925	0.0076711	0.0128015	0.435724	0.64004	0.779704	0.0170335	1.52021	1.70908	0.0191456	0.0151545	1.50578	1.53478	AACCAGTCCCTGTCCCTCGGCTCTCCTCGCTTGCTGAGGAATCTCAGAGATTTTAGTGACACAAAACTCCCCTCAGCCAGCCGGATAGATTACGTCCGCGACATTAAGGAGCTGATCATCGTGAAGAACTTCACCCTGTTCTTCCAGATCGACCTGTGC
A_tiles_P0CE41:802	NLRDFSDTKLPSASRIDYVRDIKELIIVKNFTLFFQIDLCIIAVLNHILNVSL	HAP1	P0CE41	802	0.0126341	0.853613	-0.490588	0.0111264	0.012614	0.014369	0.675283	1.05245	0.875178	0.0104174	0.929731	-0.297299	0.00975657	0.011123	0.767342	1.12649	AACCTGCGCGACTTCTCCGATACAAAACTGCCCAGTGCCTCTAGGATAGATTACGTGCGGGACATTAAGGAGCTCATCATCGTTAAGAACTTCACCCTGTTCTTTCAGATCGACCTCTGCATCATTGCTGTCTTGAATCACATCCTGAACGTGAGCCTG
A_tiles_P0CE41:815	SRIDYVRDIKELIIVKNFTLFFQIDLCIIAVLNHILNVSLARSVRKFELDSLI	HAP1	P0CE41	815	0.0153191	1.03502	0.106696	0.0159013	0.0123418	0.0183183	0.965086	1.02974	1.11572	0.0111751	0.997355	-0.0108091	0.0126782	0.00985022	0.997121	0.997588	AGTCGCATCGACTACGTGAGAGACATCAAGGAGCTGATTATCGTGAAGAACTTCACCCTGTTCTTCCAGATCGACCTGTGCATTATTGCTGTTCTCAACCACATACTGAATGTGTCTTTGGCCAGGAGCGTCCGGAAATTTGAACTCGATTCCCTGATC
A_tiles_P0CE41:828	IVKNFTLFFQIDLCIIAVLNHILNVSLARSVRKFELDSLINLLKNLTYGTENV	HAP1	P0CE41	828	0.011005	0.743542	-0.918491	0.0112508	0.00896755	0.0132102	0.682833	0.74821	0.804596	0.0120714	1.07735	0.304011	0.0136477	0.0106772	1.07338	1.08134	ATCGTGAAGAACTTCACGCTGTTCTTTCAGATCGACCTGTGCATTATAGCCGTGCTCAATCACATTCTCAATGTGAGCCTCGCTAGATCTGTCCGCAAATTCGAATTGGATTCCCTGATCAACCTGCTGAAGAACCTGACCTACGGCACAGAGAACGTT
A_tiles_P0CE41:841	CIIAVLNHILNVSLARSVRKFELDSLINLLKNLTYGTENVNDVVSSLINKGLL	HAP1	P0CE41	841	0.0175385	1.18498	0.526067	0.0200084	0.0161073	0.0167396	1.21435	1.34392	1.01956	0.0151874	1.35545	1.24098	0.0147459	0.0156422	1.15974	1.58417	TGCATCATTGCCGTTCTGAACCACATACTCAATGTGTCATTGGCTAGAAGCGTGCGCAAATTCGAACTGGATAGTCTGATCAACCTGCTCAAGAACCTGACCTACGGAACAGAGAATGTCAATGACGTGGTCTCTTCCCTCATCAACAAGGGCTTGCTG
A_tiles_P0CE41:854	LARSVRKFELDSLINLLKNLTYGTENVNDVVSSLINKGLLPTSEGGSVDSNND	HAP1	P0CE41	854	0.021437	1.44838	1.14821	0.0325137	0.0170801	0.0177394	1.97333	1.42508	1.08046	0.0154558	1.3794	1.31246	0.016709	0.0142966	1.31414	1.4479	CTGGCCCGCTCCGTGCGGAAATTCGAGCTGGACTCACTGATTAACCTCCTCAAGAACTTGACATACGGCACTGAGAATGTCAACGATGTGGTTAGCTCTCTGATCAATAAGGGACTCCTGCCCACCTCCGAAGGCGGGAGCGTGGACAGTAATAACGAC
A_tiles_P0CE41:867	INLLKNLTYGTENVNDVVSSLINKGLLPTSEGGSVDSNNDEIYGLPKLPDILN	HAP1	P0CE41	867	0.0182424	1.23253	0.648027	0.0227596	0.0147808	0.0180461	1.38133	1.23324	1.09913	0.0102495	0.914745	-0.363607	0.0118392	0.00887321	0.931138	0.89864	ATCAACCTGCTGAAGAATCTCACTTATGGCACCGAGAACGTTAACGACGTCGTGAGTAGCTTGATTAACAAAGGTCTGCTCCCTACATCTGAAGGGGGCTCAGTGGATTCCAATAATGATGAGATATACGGACTGCCAAAGCTCCCCGACATCCTGAAC
A_tiles_P0CE41:880	VNDVVSSLINKGLLPTSEGGSVDSNNDEIYGLPKLPDILNHGQHNQNLYADGR	HAP1	P0CE41	880	0.0128933	0.871122	-0.427653	0.0151357	0.0100049	0.0141538	0.918617	0.834761	0.862067	0.012007	1.0716	0.282162	0.0126417	0.0114041	0.994251	1.15496	GTGAACGACGTTGTCTCCTCACTCATTAATAAGGGGCTGCTGCCAACCAGCGAAGGAGGTTCTGTGGATAGTAACAATGACGAGATCTATGGGCTGCCCAAACTCCCTGATATCTTGAATCATGGCCAGCACAACCAGAACCTGTACGCCGACGGCCGC
A_tiles_P0CE41:893	LPTSEGGSVDSNNDEIYGLPKLPDILNHGQHNQNLYADGRNTSSSDIDKKLDL	HAP1	P0CE41	893	0.0126523	0.854842	-0.48613	0.0113509	0.0122445	0.0145725	0.688913	1.02162	0.887572	0.00688284	0.614279	-1.98842	0.0092565	0.00511785	0.728012	0.518314	CTGCCAACATCCGAGGGAGGCTCTGTGGACAGTAACAACGATGAAATTTACGGTCTCCCTAAGCTGCCCGATATCTTGAACCATGGGCAGCACAATCAGAATCTCTATGCCGATGGCAGAAACACCTCCAGCAGCGACATCGACAAAAAGCTGGACCTG
A_tiles_P0CE41:906	DEIYGLPKLPDILNHGQHNQNLYADGRNTSSSDIDKKLDLPHESTTRALFFSK	HAP1	P0CE41	906	0.0101649	0.686784	-1.16461	0.00943947	0.00812327	0.0136972	0.572901	0.677767	0.834258	0.0114618	1.02295	0.0925716	0.0126118	0.0104167	0.9919	1.05496	GACGAAATCTACGGCCTCCCTAAGTTGCCCGACATTCTGAACCACGGACAGCATAATCAGAACCTCTATGCTGATGGGAGAAACACTTCTAGCTCCGACATCGACAAAAAACTGGATCTGCCACACGAGAGTACAACCCGCGCCCTGTTTTTCTCAAAG
A_tiles_P0CE41:91	LCHYMEQTWAEEAEKELLKDNELKKLRERVKSLEKTLSKVHSSPSSNSLKSYN	HAP1	P0CE41	91	0.00865942	0.585067	-1.66145	0.013194	0.00571239	0.00861534	0.80077	0.476615	0.524736	0.00964941	0.861191	-0.609777	0.00851295	0.0109376	0.669533	1.10771	CTGTGCCATTATATGGAGCAGACATGGGCTGAGGAGGCCGAGAAAGAACTCCTCAAAGACAATGAGCTGAAGAAGCTGAGAGAACGCGTGAAGAGTCTGGAAAAAACCCTGAGCAAGGTCCACTCATCTCCCTCCTCCAACAGCTTGAAGTCCTACAAC
A_tiles_P0CE41:919	NHGQHNQNLYADGRNTSSSDIDKKLDLPHESTTRALFFSKHMTIRMLLYLLNY	HAP1	P0CE41	919	0.0117295	0.792492	-0.720871	0.0132509	0.0104116	0.0116969	0.804223	0.868698	0.712425	0.0170306	1.51994	1.70837	0.0187392	0.0154777	1.47381	1.56752	AACCACGGGCAGCACAACCAGAATTTGTATGCTGACGGCAGGAATACCAGCAGTTCCGACATTGACAAGAAACTCGATCTGCCCCATGAGTCAACGACAAGAGCCCTGTTTTTCTCTAAGCACATGACTATCCGCATGCTGCTCTACCTGCTGAACTAC
A_tiles_P0CE41:932	RNTSSSDIDKKLDLPHESTTRALFFSKHMTIRMLLYLLNYILFTHYEPMGSED	HAP1	P0CE41	932	0.0230258	1.55572	1.36981	0.028659	0.0204866	0.0207929	1.73938	1.7093	1.26644	0.0228956	2.04338	2.9159	0.0223888	0.0234138	1.76085	2.37125	CGCAACACCTCCAGTAGCGACATTGACAAGAAGCTGGATTTGCCCCATGAATCAACGACTAGAGCCCTGTTTTTCAGCAAACACATGACCATCCGGATGCTCCTCTATCTGCTGAATTACATCCTGTTCACACACTACGAGCCTATGGGCTCTGAGGAC
A_tiles_P0CE41:944	DLPHESTTRALFFSKHMTIRMLLYLLNYILFTHYEPMGSEDPGTNILAKEYAQ	HAP1	P0CE41	944	0.0116231	0.785305	-0.749108	0.013086	0.00894882	0.0134088	0.794218	0.746647	0.816695	0.0207897	1.85544	2.5222	0.0209739	0.020607	1.64957	2.08699	GACCTGCCCCACGAGTCCACCACTCGCGCATTGTTCTTTAGCAAGCACATGACAATTAGGATGCTGCTGTACCTCCTGAACTACATCCTGTTCACGCATTATGAACCTATGGGATCTGAGGATCCAGGCACCAATATCCTCGCTAAAGAGTACGCCCAG
A_tiles_P0CE41:957	SKHMTIRMLLYLLNYILFTHYEPMGSEDPGTNILAKEYAQEALNFAMDGYRNC	HAP1	P0CE41	957	0.0233407	1.577	1.41192	0.0282653	0.0189194	0.0237783	1.71548	1.57855	1.44827	0.0253283	2.2605	3.32795	0.0276435	0.0232071	2.17413	2.35031	TCCAAGCACATGACAATCCGGATGCTCCTGTACCTGCTGAACTACATCCTCTTTACTCATTATGAGCCTATGGGAAGCGAGGATCCCGGCACCAATATTCTGGCAAAAGAATATGCTCAGGAGGCCTTGAACTTCGCCATGGACGGGTACCGCAACTGC
A_tiles_P0CE41:970	NYILFTHYEPMGSEDPGTNILAKEYAQEALNFAMDGYRNCMIFFNNIRNTNSL	HAP1	P0CE41	970	0.0317223	2.14329	2.36291	0.0375787	0.0221176	0.0384072	2.28073	1.84539	2.33928	0.0163482	1.45904	1.54151	0.0195483	0.013672	1.53745	1.38464	AACTACATCTTGTTCACTCACTACGAGCCCATGGGCAGCGAAGATCCTGGAACAAATATTCTCGCTAAGGAGTATGCCCAGGAGGCCCTGAATTTTGCAATGGACGGGTACCGCAATTGCATGATCTTCTTCAACAACATACGGAACACCAACTCCCTG
A_tiles_P0CE41:983	EDPGTNILAKEYAQEALNFAMDGYRNCMIFFNNIRNTNSLFDYMNVILSYPCL	HAP1	P0CE41	983	0.018765	1.26785	0.735581	0.0227596	0.014077	0.0206241	1.38133	1.17452	1.25615	0.0144889	1.2931	1.04886	0.0183074	0.0114668	1.43986	1.16131	GAGGACCCCGGCACAAATATCTTGGCAAAGGAGTATGCCCAGGAAGCTCTCAATTTTGCCATGGATGGGTACCGGAACTGTATGATATTCTTCAACAACATCCGCAACACCAACAGCCTGTTCGACTACATGAATGTGATTCTGTCCTACCCTTGCCTG
A_tiles_P0CE41:996	QEALNFAMDGYRNCMIFFNNIRNTNSLFDYMNVILSYPCLDIGHRSLQFIVCL	HAP1	P0CE41	996	0.0210655	1.42328	1.09402	0.0290609	0.0180218	0.0178488	1.76377	1.50366	1.08712	0.0183791	1.6403	2.01931	0.0214272	0.0157646	1.68522	1.59657	CAGGAGGCCCTGAATTTTGCTATGGACGGCTACCGCAATTGCATGATATTCTTCAACAACATTCGGAACACCAACAGCCTCTTCGACTATATGAATGTGATCCTGTCTTACCCCTGTCTGGATATCGGGCACAGGTCCCTCCAGTTTATCGTCTGCTTG
A_tiles_P0CY08:0	MNKIPIKDLLNPQITDEFKSSILDINKKLFSICCNLPKLPESVTTEEEVELRD	MATALPHA2	P0CY08	0	0.0256943	1.73601	1.70968	0.0292445	0.0204163	0.0284111	1.77491	1.70344	1.73044	0.00960265	0.857017	-0.6296	0.0104644	0.00881184	0.823014	0.892425	ATGAATAAAATTCCCATCAAGGATCTCCTGAACCCACAGATAACCGACGAGTTTAAGAGTTCTATCCTGGACATCAACAAGAAGCTGTTCAGCATTTGCTGTAACCTGCCGAAATTGCCTGAATCCGTGACAACTGAAGAGGAGGTCGAGCTCCGCGAC
A_tiles_P0CY08:109	SADGLVFNVVTQDMINKSTKPYRGHRFTKENVRILESWFAKNIENPYLDTKGL	MATALPHA2	P0CY08	109	0.0252146	1.70361	1.65128	0.0266554	0.0227852	0.0263949	1.61777	1.90109	1.60764	0.0121312	1.08269	0.324177	0.0130148	0.0113077	1.0236	1.14519	TCTGCCGACGGACTGGTGTTCAACGTCGTGACGCAGGATATGATCAATAAAAGCACAAAGCCTTATCGCGGGCACAGGTTCACTAAGGAAAACGTTCGGATTTTGGAGTCCTGGTTTGCTAAGAACATCGAGAATCCCTACCTCGACACCAAAGGCCTG
A_tiles_P0CY08:12	QITDEFKSSILDINKKLFSICCNLPKLPESVTTEEEVELRDILGFLSRANKNR	MATALPHA2	P0CY08	12	0.0315618	2.13245	2.3472	0.0386993	0.0288406	0.0281695	2.34874	2.40632	1.71572	0.0152797	1.36368	1.2657	0.017194	0.0135786	1.35228	1.37518	CAGATAACTGACGAGTTCAAGTCATCTATCCTGGACATCAACAAGAAGCTCTTCTCCATCTGCTGTAATCTGCCCAAACTCCCTGAGAGTGTCACAACCGAGGAAGAAGTGGAGTTGAGGGATATTCTGGGCTTTCTGAGCCGCGCCAACAAAAACCGG
A_tiles_P0CY08:121	DMINKSTKPYRGHRFTKENVRILESWFAKNIENPYLDTKGLENLMKNTSLSRI	MATALPHA2	P0CY08	121	0.0233217	1.57571	1.40939	0.0312218	0.0176195	0.0230585	1.89492	1.47009	1.40443	0.0167342	1.49349	1.63673	0.017957	0.0155946	1.4123	1.57935	GATATGATCAACAAGAGTACCAAGCCTTACAGGGGCCACAGATTCACAAAAGAGAACGTGCGGATTCTGGAAAGCTGGTTTGCCAAAAACATCGAGAATCCCTATCTGGACACTAAGGGACTGGAGAATCTCATGAAGAACACCTCTTTGTCCCGCATA
A_tiles_P0CY08:133	HRFTKENVRILESWFAKNIENPYLDTKGLENLMKNTSLSRIQIKNWVSNRRRK	MATALPHA2	P0CY08	133	0.0122087	0.824871	-0.596751	0.0162092	0.00751322	0.0149424	0.98377	0.626867	0.9101	0.0101596	0.906725	-0.399539	0.00822507	0.0125492	0.646892	1.27092	CACCGCTTCACCAAGGAAAACGTCCGGATACTGGAGAGTTGGTTTGCCAAAAACATTGAGAACCCCTACTTGGACACTAAAGGCCTGGAGAATCTCATGAAGAACACATCTCTGTCCAGAATCCAGATCAAGAACTGGGTGAGCAATCGGCGCAGGAAG
A_tiles_P0CY08:145	SWFAKNIENPYLDTKGLENLMKNTSLSRIQIKNWVSNRRRKEKTITIAPELAD	MATALPHA2	P0CY08	145	0.0169292	1.14381	0.416464	0.0171125	0.0143239	0.019794	1.03859	1.19512	1.2056	0.0162306	1.44855	1.51205	0.0173412	0.0151911	1.36386	1.53849	TCCTGGTTCGCCAAGAACATAGAGAACCCTTACCTGGATACTAAGGGCCTCGAAAACTTGATGAAGAATACGTCTCTGAGCCGGATTCAGATCAAGAACTGGGTGAGTAATAGAAGGCGCAAAGAGAAAACCATCACAATCGCACCCGAGCTGGCTGAC
A_tiles_P0CY08:157	DTKGLENLMKNTSLSRIQIKNWVSNRRRKEKTITIAPELADLLSGEPLAKKKE	MATALPHA2	P0CY08	157	0.0179931	1.21569	0.605385	0.0185793	0.0175962	0.0178186	1.12761	1.46814	1.08528	0.0139493	1.24495	0.893997	0.0155665	0.0125001	1.22429	1.26596	GACACTAAGGGCCTGGAGAACCTCATGAAGAACACGTCCTTGTCTAGAATTCAGATCAAGAACTGGGTGAGTAATCGCAGGCGGAAAGAAAAAACAATCACCATAGCTCCAGAACTGGCAGATCTGCTGAGCGGGGAGCCCCTCGCCAAAAAGAAGGAG
A_tiles_P0CY08:24	INKKLFSICCNLPKLPESVTTEEEVELRDILGFLSRANKNRKISDEEKKLLQT	MATALPHA2	P0CY08	24	0.0217169	1.46729	1.18842	0.0247493	0.018139	0.022815	1.50208	1.51343	1.3896	0.0177004	1.57973	1.86578	0.0215518	0.0145373	1.69502	1.47227	ATCAACAAGAAGCTGTTCTCTATCTGTTGCAATTTGCCCAAACTGCCTGAGTCCGTGACAACTGAGGAAGAAGTCGAACTCAGAGATATACTCGGCTTTCTGAGCAGGGCCAACAAAAACCGCAAAATTAGTGACGAGGAGAAGAAGCTGCTGCAGACC
A_tiles_P0CY08:36	PKLPESVTTEEEVELRDILGFLSRANKNRKISDEEKKLLQTTSQLTTTITVLL	MATALPHA2	P0CY08	36	0.0139901	0.945232	-0.174582	0.0163477	0.0135789	0.0123351	0.992175	1.13296	0.751298	0.0131778	1.17609	0.661834	0.014737	0.0117836	1.15904	1.19339	CCTAAGCTGCCCGAGTCTGTGACTACTGAGGAGGAAGTCGAACTCAGAGATATTCTGGGCTTCCTGAGTCGGGCCAATAAAAACCGCAAGATCAGCGACGAGGAAAAAAAGCTGTTGCAGACCACCTCCCAGCTGACAACAACGATCACCGTGCTCCTC
A_tiles_P0CY08:48	VELRDILGFLSRANKNRKISDEEKKLLQTTSQLTTTITVLLKEMRSIENDRSN	MATALPHA2	P0CY08	48	0.0142508	0.962847	-0.117352	0.016428	0.0131385	0.0134088	0.997049	1.09621	0.816695	0.0116795	1.04237	0.169329	0.0111038	0.012285	0.873304	1.24417	GTGGAGCTCCGCGATATACTGGGCTTCCTGAGCCGGGCCAACAAGAATAGAAAGATCTCTGACGAGGAAAAGAAACTGCTCCAGACGACCAGTCAGCTGACCACAACTATTACCGTCTTGCTGAAAGAAATGAGGTCCATCGAGAACGACCGCTCAAAC
A_tiles_P0CY08:60	ANKNRKISDEEKKLLQTTSQLTTTITVLLKEMRSIENDRSNYQLTQKNKSADG	MATALPHA2	P0CY08	60	0.0159734	1.07923	0.236342	0.0173407	0.013369	0.0175805	1.05244	1.11545	1.07078	0.00915423	0.816997	-0.824736	0.00851295	0.00984383	0.669533	0.99694	GCCAACAAGAACAGGAAGATCTCTGACGAGGAGAAGAAACTGCTCCAGACGACTTCACAATTGACCACCACAATCACAGTGCTGCTGAAAGAAATGCGCAGCATTGAGAATGATCGGAGTAACTACCAGCTCACCCAGAAAAATAAGTCCGCTGACGGC
A_tiles_P0CY08:72	KLLQTTSQLTTTITVLLKEMRSIENDRSNYQLTQKNKSADGLVFNVVTQDMIN	MATALPHA2	P0CY08	72	0.0146448	0.989466	-0.032825	0.0150572	0.0128711	0.0162066	0.913856	1.0739	0.987099	0.00854445	0.762575	-1.10602	0.0088999	0.00820319	0.699966	0.830784	AAGCTGCTGCAGACCACCAGTCAGTTGACGACTACCATTACTGTCCTCCTCAAAGAAATGCGCAGCATCGAGAACGACAGATCTAACTACCAACTGACACAGAAGAATAAATCCGCCGATGGCCTGGTTTTCAATGTGGTGACACAGGACATGATCAAC
A_tiles_P0CY08:85	TVLLKEMRSIENDRSNYQLTQKNKSADGLVFNVVTQDMINKSTKPYRGHRFTK	MATALPHA2	P0CY08	85	0.0146109	0.987173	-0.0400135	0.0162569	0.0100141	0.0191594	0.986663	0.835529	1.16694	0.0126058	1.12505	0.480772	0.0119549	0.0132922	0.940239	1.34618	ACCGTTCTCCTGAAGGAAATGCGCTCTATCGAGAATGACCGGAGCAACTACCAATTGACTCAGAAAAACAAATCCGCCGATGGGCTGGTCTTTAATGTGGTGACACAGGACATGATTAACAAGAGTACGAAGCCCTATAGAGGCCACAGGTTCACCAAG
A_tiles_P0CY08:97	DRSNYQLTQKNKSADGLVFNVVTQDMINKSTKPYRGHRFTKENVRILESWFAK	MATALPHA2	P0CY08	97	0.0265457	1.79354	1.81073	0.0329605	0.0203597	0.0278754	2.00044	1.69871	1.69781	0.0176475	1.57501	1.85358	0.020412	0.0152575	1.60538	1.54521	GACCGGAGTAACTACCAGCTGACACAGAAGAATAAATCCGCTGATGGACTGGTTTTCAACGTGGTGACCCAAGACATGATCAACAAGTCTACTAAGCCCTATAGAGGCCACAGGTTTACGAAAGAGAATGTCCGCATTCTCGAAAGCTGGTTCGCCAAG
A_tiles_P10961:0	MNNAANTGTTNESNVSDAPRIEPLPSLNDDDIEKILQPNDIFTTDRTDASTTS	HSF1	P10961	0	0.0247021	1.66898	1.58762	0.0243853	0.021203	0.0291526	1.47999	1.76908	1.7756	0.0093149	0.831336	-0.753742	0.00968481	0.00895912	0.761698	0.90734	ATGAACAACGCCGCAAACACCGGCACTACCAATGAGAGCAATGTGTCAGATGCTCCTAGAATAGAACCCCTGCCATCTCTCAATGACGACGATATTGAGAAGATCCTGCAGCCGAACGATATCTTCACAACAGACCGCACGGACGCCAGTACCACTTCC
A_tiles_P10961:104	NLYGHNSRENTNPNSTLLSSKLLAHPPVPYGQNPDLLQHAVYRAQPSSGTTNA	HSF1	P10961	104	0.0104804	0.708097	-1.06988	0.0100595	0.00871061	0.0131372	0.610532	0.726772	0.80015	0.00784738	0.700363	-1.45327	0.00945883	0.00651047	0.743925	0.659352	AACCTCTACGGCCACAACTCCAGGGAGAACACTAATCCTAATAGTACACTCCTGTCCTCTAAGCTGCTGGCCCATCCGCCAGTCCCCTATGGACAAAATCCTGACTTGCTGCAGCACGCTGTGTACCGCGCACAGCCCAGCAGCGGGACGACCAACGCC
A_tiles_P10961:117	NSTLLSSKLLAHPPVPYGQNPDLLQHAVYRAQPSSGTTNAQPRQTTRRYQSHK	HSF1	P10961	117	0.0102945	0.695542	-1.12533	0.0102096	0.0077752	0.0137435	0.619643	0.648726	0.837079	0.0111123	0.991752	-0.0337947	0.00985295	0.0125327	0.774922	1.26925	AACAGTACCTTGCTGTCTAGCAAACTCCTGGCTCACCCCCCTGTCCCATACGGACAGAATCCTGACCTGCTCCAACATGCAGTGTATAGAGCCCAGCCCTCCAGCGGCACTACAAACGCCCAGCCGCGCCAGACCACGCGGAGGTACCAGTCCCACAAG
A_tiles_P10961:13	NVSDAPRIEPLPSLNDDDIEKILQPNDIFTTDRTDASTTSSTAIEDIINPSLD	HSF1	P10961	13	0.0336631	2.27442	2.54698	0.0307365	0.0318957	0.0389115	1.86546	2.66123	2.36999	0.00932525	0.83226	-0.749212	0.00937549	0.00927527	0.737371	0.939359	AACGTGAGCGACGCCCCGAGGATTGAACCTTTGCCCTCCCTCAATGACGATGACATTGAGAAGATCCTGCAGCCAAACGACATCTTCACAACCGATAGAACCGATGCTTCTACCACTAGTAGCACGGCAATAGAGGACATCATCAACCCCTCCCTGGAC
A_tiles_P10961:130	PVPYGQNPDLLQHAVYRAQPSSGTTNAQPRQTTRRYQSHKSRPAFVNKLWSML	HSF1	P10961	130	0.00976518	0.659777	-1.28896	0.0139707	0.00744173	0.00895669	0.847914	0.620903	0.545527	0.0133304	1.18971	0.708811	0.0151165	0.0117554	1.18889	1.19053	CCCGTGCCGTACGGGCAGAACCCTGACCTCCTGCAGCACGCCGTCTATCGCGCTCAGCCTTCTAGCGGCACGACAAATGCCCAACCCAGGCAGACTACCCGCAGATACCAGTCACATAAAAGTCGGCCAGCATTCGTGAACAAGCTGTGGTCCATGTTG
A_tiles_P10961:143	AVYRAQPSSGTTNAQPRQTTRRYQSHKSRPAFVNKLWSMLNDDSNTKLIQWAE	HSF1	P10961	143	0.0150104	1.01417	0.0436014	0.0219687	0.010061	0.0153014	1.33333	0.839443	0.931964	0.0159066	1.41964	1.42978	0.0194909	0.0129815	1.53294	1.31471	GCCGTGTACCGCGCGCAGCCTTCTTCCGGCACGACCAACGCTCAGCCACGCCAAACAACTAGACGGTATCAGAGTCACAAATCAAGGCCCGCATTCGTCAATAAGCTGTGGTCCATGCTGAACGATGACAGCAACACCAAGCTCATCCAGTGGGCCGAG
A_tiles_P10961:156	AQPRQTTRRYQSHKSRPAFVNKLWSMLNDDSNTKLIQWAEDGKSFIVTNREEF	HSF1	P10961	156	0.0138573	0.936258	-0.204149	0.0157239	0.0113077	0.0149659	0.954313	0.943463	0.91153	0.0114404	1.02103	0.0849362	0.01303	0.0100447	1.0248	1.01729	GCCCAGCCCCGCCAGACGACCCGGCGCTACCAATCACACAAAAGTAGACCAGCATTCGTCAACAAGCTGTGGTCCATGCTCAATGACGATTCTAACACTAAGCTGATTCAGTGGGCTGAAGACGGCAAGAGCTTTATCGTGACAAACAGGGAGGAGTTC
A_tiles_P10961:169	KSRPAFVNKLWSMLNDDSNTKLIQWAEDGKSFIVTNREEFVHQILPKYFKHSN	HSF1	P10961	169	0.0113134	0.764382	-0.832811	0.010917	0.0122274	0.0108478	0.662577	1.0202	0.660708	0.014257	1.27241	0.983014	0.0208907	0.00972976	1.64303	0.985387	AAGTCTCGGCCTGCTTTCGTCAACAAGCTCTGGAGTATGTTGAATGATGACTCCAACACAAAGCTGATTCAGTGGGCCGAAGACGGCAAATCATTTATCGTGACCAATCGCGAGGAGTTTGTGCATCAGATCCTGCCCAAATACTTCAAGCACAGCAAC
A_tiles_P10961:182	LNDDSNTKLIQWAEDGKSFIVTNREEFVHQILPKYFKHSNFASFVRQLNMYGW	HSF1	P10961	182	0.0168647	1.13945	0.404633	0.0169817	0.0133896	0.0210954	1.03065	1.11716	1.28486	0.0139259	1.24285	0.887129	0.0139557	0.0138961	1.09759	1.40734	CTGAACGATGACAGTAATACCAAGTTGATCCAGTGGGCTGAAGACGGAAAGAGCTTTATTGTGACAAATAGGGAGGAGTTCGTCCATCAGATCCTGCCCAAGTATTTCAAACACTCTAACTTTGCCTCCTTCGTGCGCCAACTCAACATGTACGGCTGG
A_tiles_P10961:195	EDGKSFIVTNREEFVHQILPKYFKHSNFASFVRQLNMYGWHKVQDVKSGSIQS	HSF1	P10961	195	0.0128323	0.867005	-0.44234	0.0123025	0.0121055	0.0141886	0.746664	1.01003	0.864185	0.0133262	1.18933	0.707514	0.0134737	0.0131802	1.05969	1.33483	GAGGACGGCAAGTCCTTCATCGTTACCAACCGGGAAGAGTTTGTCCACCAGATTCTGCCCAAATACTTCAAGCATAGCAACTTCGCCTCATTTGTGCGCCAACTCAATATGTATGGGTGGCACAAAGTGCAGGATGTGAAGAGTGGATCCATCCAGTCT
A_tiles_P10961:208	FVHQILPKYFKHSNFASFVRQLNMYGWHKVQDVKSGSIQSSSDDKWQFENENF	HSF1	P10961	208	0.0142611	0.963542	-0.115115	0.0155238	0.0121975	0.0153176	0.942172	1.01771	0.932953	0.0122437	1.09273	0.361835	0.0118327	0.012669	0.930625	1.28306	TTCGTGCACCAGATCCTGCCCAAGTACTTTAAGCACTCCAATTTCGCCAGCTTTGTTAGACAGCTCAACATGTATGGCTGGCATAAAGTGCAGGATGTCAAAAGCGGGTCCATTCAATCTAGTTCAGACGACAAGTGGCAGTTCGAAAACGAGAACTTC
A_tiles_P10961:221	NFASFVRQLNMYGWHKVQDVKSGSIQSSSDDKWQFENENFIRGREDLLEKIIR	HSF1	P10961	221	0.0176894	1.19517	0.552622	0.0225449	0.014254	0.0172249	1.3683	1.18929	1.04912	0.0114408	1.02107	0.0850717	0.0135058	0.00969153	1.06221	0.981516	AACTTCGCCTCCTTCGTGAGGCAGCTGAATATGTACGGATGGCACAAAGTCCAGGATGTGAAATCCGGCAGTATACAGAGCTCTAGCGACGACAAGTGGCAATTTGAAAACGAGAACTTCATTAGAGGGCGCGAGGACCTGCTCGAGAAGATCATCCGG
A_tiles_P10961:234	WHKVQDVKSGSIQSSSDDKWQFENENFIRGREDLLEKIIRQKGSSNNHNSPSG	HSF1	P10961	234	0.0167326	1.13052	0.380253	0.0156592	0.0138872	0.0215429	0.950389	1.15868	1.31212	0.0102461	0.914448	-0.364933	0.0115394	0.00909781	0.907561	0.921387	TGGCATAAGGTCCAGGACGTGAAGTCTGGATCCATCCAATCCAGCAGCGACGACAAATGGCAGTTTGAGAATGAGAACTTCATTCGCGGCAGAGAAGATCTGCTCGAGAAGATCATAAGGCAGAAAGGGAGCTCCAATAACCACAACAGTCCCTCAGGC
A_tiles_P10961:247	SSSDDKWQFENENFIRGREDLLEKIIRQKGSSNNHNSPSGNGNPANGSNIPLD	HSF1	P10961	247	0.0137563	0.929435	-0.226819	0.0136442	0.01525	0.0125109	0.828092	1.27239	0.762005	0.0111558	0.995635	-0.0178508	0.0084706	0.0146923	0.666202	1.48797	TCATCCTCCGACGACAAGTGGCAGTTCGAGAACGAGAACTTTATCCGCGGACGGGAAGATCTGCTCGAGAAAATTATAAGGCAGAAGGGCAGCTCCAACAACCACAATAGTCCCTCTGGTAATGGCAATCCTGCCAACGGGAGCAACATCCCACTGGAC
A_tiles_P10961:26	LNDDDIEKILQPNDIFTTDRTDASTTSSTAIEDIINPSLDPQSAASPVPSSSF	HSF1	P10961	26	0.0297432	2.00957	2.16324	0.0265329	0.0254861	0.038911	1.61034	2.12644	2.36996	0.00996181	0.889072	-0.479767	0.011541	0.00859873	0.907682	0.870842	CTGAATGACGACGATATCGAGAAGATCCTGCAGCCCAACGACATTTTTACCACTGACAGAACCGATGCAAGCACAACGAGCTCTACCGCCATTGAAGATATCATAAACCCTAGCCTCGACCCGCAGTCCGCTGCCTCCCCAGTGCCCAGTTCATCCTTC
A_tiles_P10961:260	FIRGREDLLEKIIRQKGSSNNHNSPSGNGNPANGSNIPLDNAAGSNNSNNNIS	HSF1	P10961	260	0.0118823	0.802817	-0.680749	0.0111992	0.0105838	0.0141538	0.679701	0.883061	0.862067	0.00900347	0.803542	-0.892498	0.0142933	0.00567134	1.12415	0.574369	TTCATCCGCGGCAGGGAGGACCTGCTCGAAAAGATTATCCGGCAGAAAGGGTCCTCCAATAACCACAACTCACCCAGTGGAAACGGTAATCCAGCAAATGGCAGCAATATACCTCTGGATAACGCCGCTGGGTCCAACAACAGCAATAACAACATCTCT
A_tiles_P10961:273	RQKGSSNNHNSPSGNGNPANGSNIPLDNAAGSNNSNNNISSSNSFFNNGHLLQ	HSF1	P10961	273	0.0120316	0.812904	-0.642048	0.0102346	0.011348	0.0149959	0.621162	0.946826	0.91336	0.00872902	0.779048	-1.01881	0.010379	0.00734138	0.816292	0.743503	CGCCAGAAGGGGAGTTCCAACAACCATAACTCTCCCAGTGGTAATGGAAATCCTGCAAATGGGAGCAATATTCCACTGGACAATGCTGCCGGCTCCAACAACAGCAATAACAACATCTCATCTTCCAACAGCTTCTTTAACAACGGCCACCTGCTCCAG
A_tiles_P10961:286	GNGNPANGSNIPLDNAAGSNNSNNNISSSNSFFNNGHLLQGKTLRLMNEANLG	HSF1	P10961	286	0.010983	0.74206	-0.924672	0.00910618	0.0109684	0.0132644	0.552673	0.915152	0.807897	0.00898329	0.801741	-0.901651	0.00952942	0.00846847	0.749477	0.85765	GGAAACGGCAACCCCGCCAATGGGAGTAATATTCCTCTGGACAATGCTGCAGGGTCCAACAACTCCAACAATAACATCAGCTCTTCAAACAGCTTCTTTAACAACGGTCACCTGTTGCAGGGCAAGACCCTCAGACTGATGAATGAGGCCAACCTCGGC
A_tiles_P10961:299	DNAAGSNNSNNNISSSNSFFNNGHLLQGKTLRLMNEANLGDKNDVTAILGELE	HSF1	P10961	299	0.0144095	0.97357	-0.0830234	0.0121804	0.0142896	0.0171898	0.739252	1.19226	1.04698	0.0072221	0.644558	-1.79209	0.00661538	0.00788446	0.520291	0.798504	GACAATGCTGCCGGCTCCAACAACTCTAACAACAATATTAGTAGCAGCAACTCCTTCTTTAACAACGGTCACCTCCTGCAGGGAAAAACCCTCAGACTGATGAATGAAGCCAATTTGGGGGATAAGAACGACGTGACAGCAATCCTGGGCGAGCTGGAG
A_tiles_P10961:312	SSSNSFFNNGHLLQGKTLRLMNEANLGDKNDVTAILGELEQIKYNQIAISKDL	HSF1	P10961	312	0.0209074	1.41259	1.07067	0.0229604	0.0174924	0.0227547	1.39352	1.45948	1.38593	0.00920027	0.821106	-0.804266	0.010597	0.00798762	0.833443	0.808951	TCCAGCTCAAACAGTTTCTTTAACAACGGCCACCTGCTGCAAGGGAAAACACTGAGACTCATGAATGAAGCAAATCTGGGAGACAAGAACGATGTGACCGCTATACTCGGTGAGTTGGAGCAGATTAAGTACAATCAGATCGCCATCTCTAAGGACCTG
A_tiles_P10961:325	QGKTLRLMNEANLGDKNDVTAILGELEQIKYNQIAISKDLLRINKDNELLWQE	HSF1	P10961	325	0.0263306	1.77901	1.78551	0.0301465	0.020596	0.0294012	1.82965	1.71843	1.79074	0.0110544	0.986582	-0.0551219	0.0126017	0.00969706	0.991108	0.982076	CAGGGGAAGACCTTGCGCCTGATGAACGAGGCTAATCTGGGAGACAAAAATGATGTGACAGCCATTCTCGGCGAACTGGAGCAAATCAAGTACAACCAGATCGCAATATCCAAAGACCTGCTGCGGATCAACAAGGACAACGAACTCCTCTGGCAGGAG
A_tiles_P10961:338	GDKNDVTAILGELEQIKYNQIAISKDLLRINKDNELLWQENMMARERHRTQQQ	HSF1	P10961	338	0.019789	1.33703	0.900268	0.0227287	0.0145675	0.0234053	1.37945	1.21544	1.42555	0.0101527	0.906104	-0.402333	0.011571	0.00890817	0.910045	0.902181	GGCGACAAGAACGACGTGACCGCTATTCTCGGGGAGCTGGAACAGATAAAGTACAATCAGATCGCCATCTCCAAGGACCTCTTGCGGATCAACAAAGATAATGAACTGCTGTGGCAGGAGAACATGATGGCACGCGAGAGACACAGGACACAACAGCAG
A_tiles_P10961:351	EQIKYNQIAISKDLLRINKDNELLWQENMMARERHRTQQQALEKMFRFLTSIV	HSF1	P10961	351	0.0326165	2.20371	2.44909	0.0430807	0.0270982	0.0297229	2.61466	2.26094	1.81034	0.0193343	1.72554	2.22605	0.0244592	0.0152832	1.92369	1.54781	GAGCAGATCAAGTACAACCAGATTGCTATAAGCAAGGACCTCCTCAGAATCAACAAGGATAACGAGCTGTTGTGGCAGGAAAATATGATGGCCCGGGAACGCCACCGCACACAACAGCAGGCACTGGAGAAAATGTTTAGGTTCCTGACCTCCATCGTG
A_tiles_P10961:364	LLRINKDNELLWQENMMARERHRTQQQALEKMFRFLTSIVPHLDPKMIMDGLG	HSF1	P10961	364	0.017658	1.19305	0.547112	0.0237402	0.0114701	0.0202197	1.44084	0.957012	1.23152	0.0276056	2.46375	3.67925	0.0354706	0.0214845	2.78972	2.17586	CTGCTGCGCATCAACAAGGACAATGAGCTGCTGTGGCAGGAGAACATGATGGCCAGAGAACGGCATAGGACACAGCAGCAAGCTTTGGAGAAAATGTTCCGCTTTCTCACCTCCATTGTGCCCCACCTCGATCCTAAGATGATCATGGACGGCCTGGGG
A_tiles_P10961:377	ENMMARERHRTQQQALEKMFRFLTSIVPHLDPKMIMDGLGDPKVNNEKLNSAN	HSF1	P10961	377																	GAGAACATGATGGCTCGCGAGAGACACAGGACCCAGCAGCAAGCACTCGAAAAAATGTTTCGGTTCCTGACAAGCATCGTGCCACATCTGGACCCTAAAATGATTATGGATGGATTGGGCGACCCCAAGGTCAATAACGAGAAGCTGAATTCCGCCAAC
A_tiles_P10961:39	DIFTTDRTDASTTSSTAIEDIINPSLDPQSAASPVPSSSFFHDSRKPSTSTHL	HSF1	P10961	39	0.012832	0.866983	-0.442415	0.0123266	0.010648	0.016098	0.748129	0.888415	0.980482	0.00777368	0.693785	-1.49178	0.00943668	0.00640374	0.742183	0.648543	GACATCTTCACCACCGACAGGACTGACGCCTCCACCACTTCTTCCACAGCAATAGAGGATATCATTAACCCCAGCCTGGATCCTCAGAGTGCCGCTTCACCCGTGCCAAGTTCCTCTTTTTTCCATGACAGCCGCAAGCCGAGCACGAGCACACACCTC
A_tiles_P10961:390	QALEKMFRFLTSIVPHLDPKMIMDGLGDPKVNNEKLNSANNIGLNRDNTGTID	HSF1	P10961	390	0.0169764	1.14699	0.425087	0.0225605	0.0125129	0.0173312	1.36925	1.04401	1.05559	0.00847463	0.756344	-1.1395	0.00696027	0.0103185	0.547417	1.04501	CAGGCCCTGGAAAAGATGTTCCGGTTTCTGACAAGCATCGTCCCACACCTCGATCCTAAAATGATTATGGATGGTCTGGGAGACCCCAAGGTGAACAACGAGAAGTTGAATTCCGCTAATAATATCGGGCTCAACCGCGACAACACTGGCACCATAGAC
A_tiles_P10961:403	VPHLDPKMIMDGLGDPKVNNEKLNSANNIGLNRDNTGTIDELKSNDSFINDDR	HSF1	P10961	403	0.0112127	0.757577	-0.860527	0.0119751	0.0109722	0.010729	0.726793	0.915468	0.653472	0.00698931	0.623782	-1.92578	0.00885138	0.00551897	0.69615	0.558937	GTGCCCCACTTGGACCCAAAGATGATTATGGATGGCCTGGGAGACCCTAAAGTCAACAACGAAAAGCTGAATTCCGCCAATAACATCGGGCTCAATCGCGATAACACAGGTACCATAGATGAGCTGAAGTCTAACGACAGCTTCATCAACGACGACCGG
A_tiles_P10961:416	GDPKVNNEKLNSANNIGLNRDNTGTIDELKSNDSFINDDRNSFTNATTNARNN	HSF1	P10961	416	0.0113772	0.76869	-0.815391	0.0102675	0.00950813	0.0150849	0.623156	0.793313	0.918782	0.008668	0.773601	-1.04744	0.0104022	0.00722293	0.818117	0.731508	GGCGACCCCAAGGTGAACAACGAGAAGCTGAATTCTGCCAACAATATCGGACTGAATCGGGATAATACCGGGACGATTGATGAACTCAAAAGCAACGACTCCTTCATCAACGACGACAGGAACAGTTTTACTAACGCAACAACCAATGCTCGCAACAAC
A_tiles_P10961:429	NNIGLNRDNTGTIDELKSNDSFINDDRNSFTNATTNARNNMSPNNDDNSIDTA	HSF1	P10961	429	0.00984196	0.664964	-1.26468	0.00924029	0.00854962	0.0120674	0.560812	0.71334	0.734989	0.00989184	0.882827	-0.50853	0.0114062	0.0085785	0.897086	0.868793	AACAACATCGGCCTGAATCGGGATAATACCGGGACCATAGATGAGCTCAAGTCCAACGACTCTTTTATCAACGACGACAGGAACTCATTCACGAACGCAACTACAAATGCCCGCAATAATATGAGCCCCAACAACGATGACAACAGTATTGACACCGCT
A_tiles_P10961:442	DELKSNDSFINDDRNSFTNATTNARNNMSPNNDDNSIDTASTNTTNRKKNIDE	HSF1	P10961	442	0.0088854	0.600335	-1.5816	0.00867033	0.008759	0.0092372	0.52622	0.73081	0.562612	0.00938775	0.837838	-0.721953	0.0126118	0.0069879	0.9919	0.707705	GATGAACTGAAGTCCAACGACAGCTTTATCAACGATGACCGGAACTCTTTCACCAATGCTACAACCAATGCCCGCAATAATATGAGCCCCAACAATGATGACAACTCCATCGACACTGCAAGTACCAACACAACGAACAGGAAGAAAAACATTGACGAG
A_tiles_P10961:455	RNSFTNATTNARNNMSPNNDDNSIDTASTNTTNRKKNIDENIKNNNDIINDII	HSF1	P10961	455	0.0158984	1.07416	0.221746	0.0139618	0.0137181	0.0209809	0.847369	1.14458	1.27789	0.00758016	0.676515	-1.59464	0.00755587	0.00760454	0.59426	0.770154	CGGAATTCCTTCACCAATGCCACAACTAACGCTCGCAATAACATGAGCCCCAATAATGACGACAACAGTATCGATACAGCCTCTACCAACACCACGAACAGGAAAAAGAACATCGACGAGAACATCAAGAACAACAATGACATCATTAACGATATAATT
A_tiles_P10961:468	NMSPNNDDNSIDTASTNTTNRKKNIDENIKNNNDIINDIIFNTNLANNLSNYN	HSF1	P10961	468	0.0166407	1.12432	0.363191	0.0151048	0.0162938	0.0187231	0.916742	1.35948	1.14037	0.0129757	1.15805	0.598762	0.014935	0.0112734	1.17462	1.14172	AATATGTCCCCCAATAATGATGACAACAGTATTGATACTGCCAGCACAAACACCACCAACCGCAAAAAGAACATCGACGAGAACATCAAGAATAACAACGACATAATCAACGACATCATTTTCAACACGAACCTCGCTAACAACCTGTCTAATTACAAT
A_tiles_P10961:481	ASTNTTNRKKNIDENIKNNNDIINDIIFNTNLANNLSNYNSNNNAGSPIRPYK	HSF1	P10961	481	0.0153844	1.03943	0.119877	0.015235	0.0120123	0.0198962	0.924644	1.00225	1.21182	0.0154734	1.38097	1.31711	0.0155222	0.0154248	1.2208	1.56216	GCTTCCACAAATACTACGAATCGGAAAAAGAACATCGATGAGAACATAAAGAATAACAACGACATTATCAACGACATCATCTTCAACACCAACCTGGCCAACAACCTCAGTAACTACAATTCTAACAATAATGCAGGCAGCCCCATTCGCCCTTATAAG
A_tiles_P10961:494	ENIKNNNDIINDIIFNTNLANNLSNYNSNNNAGSPIRPYKQRYLLKNRANSST	HSF1	P10961	494	0.0216328	1.4616	1.17638	0.0242579	0.0149301	0.0279526	1.47226	1.2457	1.70251	0.0169816	1.51557	1.69662	0.020909	0.0137919	1.64447	1.39679	GAGAATATTAAGAATAACAACGATATCATTAACGACATCATCTTCAACACGAACCTGGCTAACAACTTGTCCAACTACAACTCTAACAATAATGCAGGCAGTCCCATACGCCCTTATAAACAGAGGTACCTCCTGAAGAATCGGGCCAATTCAAGCACC
A_tiles_P10961:507	IFNTNLANNLSNYNSNNNAGSPIRPYKQRYLLKNRANSSTSSENPSLTPFDIE	HSF1	P10961	507	0.016499	1.11474	0.336687	0.0170072	0.0134754	0.0195975	1.0322	1.12432	1.19363	0.010513	0.938265	-0.260016	0.0110031	0.0100447	0.865383	1.01729	ATCTTTAACACCAACCTGGCTAACAACCTGAGCAACTACAACAGCAACAATAATGCAGGCTCTCCTATCAGGCCATACAAACAGCGCTATCTCCTGAAGAATAGAGCCAATTCATCCACTAGTTCCGAAAACCCGTCCTTGACACCCTTCGACATTGAG
A_tiles_P10961:52	SSTAIEDIINPSLDPQSAASPVPSSSFFHDSRKPSTSTHLVRRGTPLGIYQTN	HSF1	P10961	52	0.013494	0.91171	-0.286502	0.0136017	0.0109174	0.0165465	0.825518	0.910894	1.0078	0.00987183	0.881041	-0.51679	0.0113892	0.00855662	0.895747	0.866577	TCCTCCACGGCCATCGAGGACATAATTAATCCTTCACTGGACCCACAGTCTGCTGCATCTCCTGTGCCCAGTAGCTCCTTCTTTCATGATAGCAGAAAGCCCAGTACAAGCACCCACCTGGTCAGGCGCGGCACTCCGCTCGGGATCTACCAGACCAAC
A_tiles_P10961:520	NSNNNAGSPIRPYKQRYLLKNRANSSTSSENPSLTPFDIESNNDRKISEIPFD	HSF1	P10961	520	0.0171547	1.15905	0.457485	0.0139153	0.0162204	0.0223665	0.844551	1.35335	1.36228	0.0116973	1.04396	0.175549	0.0119161	0.0114825	0.937187	1.1629	AACTCCAACAATAACGCCGGCAGCCCCATCAGGCCTTACAAGCAGAGATATCTGCTGAAAAATCGGGCTAATAGCTCCACCTCTAGTGAAAACCCCTCACTCACACCGTTTGATATTGAGTCCAACAACGACCGCAAGATAAGCGAGATCCCATTCGAC
A_tiles_P10961:533	KQRYLLKNRANSSTSSENPSLTPFDIESNNDRKISEIPFDDEEEEETDFRPFT	HSF1	P10961	533	0.0220928	1.49268	1.2416	0.0185793	0.0193949	0.0299251	1.12761	1.61822	1.82266	0.011724	1.04634	0.184849	0.0164627	0.0083493	1.29477	0.845581	AAGCAGCGCTACCTGCTCAAAAATCGGGCCAATAGTTCCACTAGCTCCGAAAACCCTTCTCTGACGCCATTTGACATCGAGTCAAACAACGACAGAAAGATTAGCGAGATCCCGTTCGATGATGAAGAGGAAGAGGAGACAGACTTCAGGCCCTTCACC
A_tiles_P10961:546	TSSENPSLTPFDIESNNDRKISEIPFDDEEEEETDFRPFTSRDPNNQTSENTF	HSF1	P10961	546	0.0166874	1.12747	0.371876	0.0158268	0.0163362	0.017973	0.960561	1.36302	1.09469	0.00934406	0.833938	-0.74099	0.00960993	0.00908554	0.755809	0.920144	ACCTCCTCCGAGAACCCCAGCCTGACTCCCTTCGACATCGAGAGCAACAATGATCGGAAGATCTCTGAGATTCCGTTCGACGATGAAGAGGAGGAAGAAACAGACTTTAGGCCTTTTACGTCACGCGACCCAAATAACCAGACCAGTGAGAACACCTTC
A_tiles_P10961:559	ESNNDRKISEIPFDDEEEEETDFRPFTSRDPNNQTSENTFDPNRFTMLSDDDL	HSF1	P10961	559	0.0209803	1.41751	1.08145	0.0189943	0.0185113	0.0262647	1.1528	1.54449	1.59971	0.0122153	1.09019	0.352361	0.0142486	0.0104722	1.12064	1.06057	GAGTCCAACAACGACCGCAAGATCAGCGAGATTCCGTTCGATGATGAGGAAGAAGAGGAGACTGACTTTCGGCCATTTACATCTAGGGACCCCAATAATCAGACCTCAGAAAACACGTTCGACCCTAACAGATTCACCATGCTGAGTGATGACGACCTC
A_tiles_P10961:572	DDEEEEETDFRPFTSRDPNNQTSENTFDPNRFTMLSDDDLKKDSHTNDNKHNE	HSF1	P10961	572	0.0120497	0.814126	-0.637391	0.0123088	0.00997118	0.0142549	0.747045	0.831948	0.868224	0.00983699	0.877931	-0.531219	0.0112855	0.0085744	0.88759	0.868378	GACGACGAGGAAGAGGAGGAAACCGATTTTCGCCCATTCACATCTCGGGATCCTAATAACCAGACGAGTGAAAATACCTTCGACCCCAATAGGTTCACTATGCTCTCCGATGATGACCTGAAAAAGGACAGCCATACCAACGACAACAAGCACAACGAG
A_tiles_P10961:585	TSRDPNNQTSENTFDPNRFTMLSDDDLKKDSHTNDNKHNESDLFWDNVHRNID	HSF1	P10961	585	0.0229459	1.55032	1.35903	0.0215773	0.0210216	0.0266348	1.30957	1.75394	1.62225	0.0122612	1.09429	0.367655	0.0136052	0.01105	1.07003	1.11909	ACATCCCGCGATCCCAACAACCAGACGTCTGAGAATACCTTCGATCCTAATCGGTTTACTATGCTGTCAGACGATGACCTCAAGAAAGACAGCCATACCAACGACAATAAGCACAACGAAAGTGACCTGTTCTGGGATAACGTGCACAGGAACATCGAC
A_tiles_P10961:598	FDPNRFTMLSDDDLKKDSHTNDNKHNESDLFWDNVHRNIDEQDARLQNLENMV	HSF1	P10961	598	0.0330348	2.23197	2.48858	0.0289538	0.0282909	0.044011	1.75727	2.36046	2.68059	0.0131738	1.17574	0.660611	0.0196453	0.0088342	1.54508	0.89469	TTCGACCCCAATCGGTTTACCATGTTGAGCGATGACGACCTGAAAAAGGATTCCCATACAAACGACAACAAGCACAACGAGTCTGACCTCTTCTGGGATAATGTGCACAGAAATATCGATGAACAGGACGCCCGCCTGCAGAACCTGGAGAACATGGTC
A_tiles_P10961:611	LKKDSHTNDNKHNESDLFWDNVHRNIDEQDARLQNLENMVHILSPGYPNKSFN	HSF1	P10961	611	0.0276692	1.86945	1.93921	0.02738	0.0206067	0.0375448	1.66175	1.71933	2.28675	0.0166794	1.4886	1.62335	0.0178282	0.0156047	1.40216	1.58037	CTGAAGAAGGACAGTCACACCAACGACAACAAGCACAACGAGAGCGACCTCTTTTGGGACAATGTGCATCGCAATATCGATGAACAGGATGCCAGACTGCAGAATCTGGAGAACATGGTCCACATTTTGTCTCCTGGCTACCCCAACAAATCCTTCAAC
A_tiles_P10961:624	ESDLFWDNVHRNIDEQDARLQNLENMVHILSPGYPNKSFNNKTSSTNTNSNME	HSF1	P10961	624																	GAGAGCGACTTGTTCTGGGACAATGTCCACCGCAATATTGATGAACAGGATGCCAGACTCCAGAATCTGGAGAATATGGTGCATATCCTGTCTCCTGGCTACCCCAACAAATCCTTTAACAACAAGACTAGCTCCACCAACACAAACAGTAACATGGAG
A_tiles_P10961:637	DEQDARLQNLENMVHILSPGYPNKSFNNKTSSTNTNSNMESAVNVNSPGFNLQ	HSF1	P10961	637	0.0098959	0.668609	-1.24774	0.00591159	0.010617	0.0154405	0.358787	0.88583	0.940436	0.00468429	0.418064	-3.55863	0.00510139	0.0043013	0.401218	0.435617	GACGAGCAAGATGCTCGCCTGCAGAATCTGGAAAATATGGTGCACATCCTCTCCCCTGGGTACCCCAACAAAAGTTTTAACAACAAGACCAGCTCCACTAACACAAACTCAAACATGGAGTCTGCCGTGAATGTCAATAGCCCAGGCTTCAACTTGCAG
A_tiles_P10961:65	DPQSAASPVPSSSFFHDSRKPSTSTHLVRRGTPLGIYQTNLYGHNSRENTNPN	HSF1	P10961	65	0.0075704	0.511488	-2.07803	0.0109787	0.0051189	0.00772024	0.666318	0.427096	0.470218	0.00869116	0.775669	-1.03655	0.00659919	0.0114463	0.519018	1.15923	GACCCGCAGAGCGCCGCTAGCCCTGTGCCCTCCTCATCCTTCTTTCACGATTCTCGGAAGCCTTCCACCAGTACACATCTCGTCCGCAGAGGAACGCCCCTGGGCATCTATCAGACTAATCTGTACGGGCACAATAGCAGGGAGAACACCAACCCAAAC
A_tiles_P10961:650	VHILSPGYPNKSFNNKTSSTNTNSNMESAVNVNSPGFNLQDYLTGESNSPNSV	HSF1	P10961	650	0.0219284	1.48158	1.21845	0.0225039	0.0194863	0.0240455	1.36581	1.62585	1.46454	0.00906311	0.808865	-0.865556	0.0106157	0.00773762	0.834909	0.783633	GTGCACATCCTCAGCCCTGGCTATCCGAACAAGAGCTTTAACAACAAAACATCCTCCACGAACACTAACTCCAACATGGAGTCTGCCGTCAATGTGAATTCTCCAGGATTCAATCTGCAGGACTACCTGACCGGGGAAAGCAACAGTCCCAATTCAGTT
A_tiles_P10961:663	NNKTSSTNTNSNMESAVNVNSPGFNLQDYLTGESNSPNSVHSVPSNGSGSTPL	HSF1	P10961	663	0.0200393	1.35394	0.93922	0.0161883	0.0180169	0.0275909	0.9825	1.50325	1.68048	0.0072921	0.650805	-1.75273	0.00664425	0.00800311	0.522562	0.810521	AACAACAAGACCTCCTCCACAAACACTAACTCCAACATGGAGAGCGCCGTCAATGTTAATTCTCCTGGGTTCAATCTGCAGGACTACCTGACGGGAGAATCAAATTCTCCCAACAGTGTGCACAGTGTGCCAAGCAACGGCAGCGGCTCCACCCCGCTC
A_tiles_P10961:676	ESAVNVNSPGFNLQDYLTGESNSPNSVHSVPSNGSGSTPLPMPNDNDTEHAST	HSF1	P10961	676	0.0128143	0.865786	-0.446699	0.0106712	0.0141492	0.013936	0.647656	1.18054	0.848804	0.00845809	0.754868	-1.14747	0.00945883	0.00756322	0.743925	0.765971	GAGTCCGCCGTGAACGTTAACAGCCCAGGCTTCAACCTGCAGGACTACCTCACTGGGGAATCTAATAGCCCTAATTCCGTCCATTCTGTGCCCTCCAATGGAAGTGGTAGCACCCCTCTGCCCATGCCGAACGATAACGACACAGAGCACGCTTCAACG
A_tiles_P10961:689	QDYLTGESNSPNSVHSVPSNGSGSTPLPMPNDNDTEHASTSVNQGENGSGLTP	HSF1	P10961	689	0.00644583	0.435508	-2.57648	0.00566906	0.00774835	0.00609701	0.344067	0.646485	0.371352	0.00766489	0.684076	-1.54928	0.00923886	0.00635906	0.726625	0.644018	CAGGACTACCTGACCGGGGAGTCTAACAGCCCCAACAGTGTGCATAGCGTCCCTTCTAATGGTTCCGGCTCCACACCGCTCCCTATGCCCAATGATAATGACACTGAACACGCCAGCACGTCAGTGAACCAAGGGGAGAACGGATCCGGCCTGACCCCA
A_tiles_P10961:702	VHSVPSNGSGSTPLPMPNDNDTEHASTSVNQGENGSGLTPFLTVDDHTLNDNN	HSF1	P10961	702	0.013713	0.926509	-0.236593	0.0110685	0.0125794	0.0185204	0.671771	1.04957	1.12802	0.00770598	0.687743	-1.52747	0.0101345	0.00585942	0.797063	0.593417	GTGCACTCCGTGCCCTCAAACGGGAGCGGCAGCACCCCGCTCCCAATGCCTAACGATAATGATACCGAGCATGCCTCCACATCTGTTAATCAGGGTGAAAATGGAAGTGGCCTGACTCCCTTCCTGACGGTCGACGACCACACCTTGAACGACAACAAC
A_tiles_P10961:715	LPMPNDNDTEHASTSVNQGENGSGLTPFLTVDDHTLNDNNTSEGSTRVSPDIK	HSF1	P10961	715	0.0101355	0.684796	-1.1736	0.0106689	0.00841274	0.0116004	0.647521	0.701919	0.706549	0.00747986	0.667563	-1.64899	0.00837306	0.00668194	0.658531	0.676718	TTGCCAATGCCGAACGACAACGACACCGAGCATGCCTCTACTAGCGTGAATCAGGGCGAAAATGGTTCCGGACTCACGCCTTTCCTGACCGTGGACGATCACACACTGAACGATAATAACACAAGTGAGGGGTCCACCCGCGTCAGCCCCGACATCAAG
A_tiles_P10961:728	TSVNQGENGSGLTPFLTVDDHTLNDNNTSEGSTRVSPDIKFSATENTKVSDNL	HSF1	P10961	728	0.0104765	0.707837	-1.07102	0.00951303	0.00855714	0.0141254	0.577366	0.713967	0.860339	0.00868718	0.775313	-1.03842	0.008961	0.00842173	0.704771	0.852916	ACCAGTGTGAACCAGGGAGAAAACGGCTCCGGTCTGACCCCTTTTCTCACAGTGGATGATCACACGCTGAATGACAATAACACCTCAGAGGGGTCTACTAGAGTTAGCCCCGACATCAAATTCAGCGCCACAGAGAATACTAAGGTCTCCGACAACTTG
A_tiles_P10961:741	PFLTVDDHTLNDNNTSEGSTRVSPDIKFSATENTKVSDNLPSFNDHSYSTQAD	HSF1	P10961	741	0.0120797	0.816159	-0.629662	0.0122728	0.0116581	0.0123198	0.744861	0.972697	0.750362	0.00765639	0.683317	-1.55381	0.00826151	0.00709559	0.649758	0.71861	CCATTCCTCACCGTGGACGATCATACTCTGAATGACAACAATACAAGCGAGGGCTCCACAAGAGTCTCACCTGATATCAAGTTCTCCGCTACGGAAAACACCAAAGTGAGTGACAACCTGCCCTCTTTTAACGATCACAGCTACAGCACCCAGGCCGAC
A_tiles_P10961:754	NTSEGSTRVSPDIKFSATENTKVSDNLPSFNDHSYSTQADTAPENAKKRFVEE	HSF1	P10961	754	0.00950216	0.642006	-1.37359	0.00953514	0.00817656	0.0110045	0.578708	0.682213	0.670251	0.00828296	0.739238	-1.23284	0.00933437	0.00734998	0.734137	0.744374	AACACGTCCGAAGGCAGCACCCGCGTGAGTCCTGACATCAAGTTTAGCGCAACTGAGAACACCAAAGTGTCCGACAATCTGCCATCATTCAATGATCACTCCTACTCTACACAGGCTGATACCGCCCCCGAAAACGCCAAGAAGCGGTTCGTCGAGGAG
A_tiles_P10961:767	KFSATENTKVSDNLPSFNDHSYSTQADTAPENAKKRFVEEIPEPAIVEIQDPT	HSF1	P10961	767	0.0103793	0.701273	-1.0999	0.00933785	0.0114791	0.0104317	0.566734	0.957765	0.635364	0.00704255	0.628534	-1.89481	0.00870642	0.00569666	0.684749	0.576933	AAGTTCTCCGCCACCGAGAACACGAAGGTGAGTGACAACCTGCCGAGCTTTAATGATCACTCTTACTCAACACAGGCCGATACTGCACCCGAAAACGCTAAAAAAAGATTCGTGGAAGAGATTCCAGAGCCCGCGATCGTCGAGATCCAGGACCCTACC
A_tiles_P10961:78	FFHDSRKPSTSTHLVRRGTPLGIYQTNLYGHNSRENTNPNSTLLSSKLLAHPP	HSF1	P10961	78	0.0145715	0.984513	-0.0483768	0.010545	0.0159793	0.0183617	0.639998	1.33323	1.11836	0.0183074	1.43986	1.48749	0.0183074		1.43986		TTCTTTCACGACAGTCGCAAGCCGTCTACCTCCACGCACTTGGTGAGGAGAGGAACTCCACTGGGGATCTATCAGACAAATCTCTACGGCCATAATTCACGGGAGAACACCAACCCCAACAGCACCCTGCTGTCCAGCAAACTCCTGGCCCACCCTCCC
A_tiles_P10961:780	LPSFNDHSYSTQADTAPENAKKRFVEEIPEPAIVEIQDPTEYNDHRLPKRAKK	HSF1	P10961	780	0.00977575	0.660491	-1.28561	0.0105971	0.00729917	0.0120779	0.643158	0.609008	0.73563	0.00778451	0.694752	-1.4861	0.00801316	0.00756238	0.630225	0.765885	CTGCCGTCCTTCAACGACCACTCTTATAGCACACAGGCCGACACCGCACCCGAGAATGCTAAGAAAAGATTTGTCGAGGAGATTCCTGAACCAGCGATCGTGGAAATCCAGGATCCTACTGAGTACAACGACCATCGCCTCCCCAAACGGGCCAAGAAG
A_tiles_P10961:91	LVRRGTPLGIYQTNLYGHNSRENTNPNSTLLSSKLLAHPPVPYGQNPDLLQHA	HSF1	P10961	91	0.0127245	0.859718	-0.468498	0.0150244	0.00972344	0.0141027	0.911862	0.811278	0.858955	0.0107301	0.957637	-0.176626	0.0135887	0.00847278	1.06874	0.858086	CTGGTCCGCAGGGGCACGCCCTTGGGGATCTATCAAACTAACCTCTACGGACATAATAGCCGGGAGAACACCAACCCTAATTCTACACTGCTCTCCAGTAAGCTCCTGGCTCACCCTCCGGTGCCCTACGGCCAGAACCCAGACCTGCTGCAGCACGCC
A_tiles_P11746:0	MSDIEEGTPTNNGQQKERRKIEIKFIENKTRRHVTFSKRKHGIMKKAFELSVL	MCM1	P11746	0	0.027283	1.84335	1.89564	0.0325137	0.0229304	0.0272393	1.97333	1.9132	1.65907	0.0178097	1.58948	1.8909	0.0194997	0.0162662	1.53363	1.64737	ATGTCTGACATTGAAGAGGGCACTCCCACCAACAATGGACAGCAGAAAGAACGCCGCAAAATCGAGATCAAGTTCATCGAGAACAAGACGAGGAGACACGTGACATTTAGCAAACGGAAGCATGGGATAATGAAGAAGGCCTTCGAGCTGTCCGTCCTC
A_tiles_P11746:104	EEDGDDDDDDDDDGNDMQRQQPQQQQPQQQQQVLNAHANSLGHLNQDQVPAGA	MCM1	P11746	104	0.0122572	0.828151	-0.584449	0.0120596	0.0107497	0.0142052	0.731925	0.896903	0.865201	0.0129757	1.15805	0.598768	0.0173819	0.00968642	1.36707	0.980999	GAGGAAGACGGTGACGATGACGATGATGACGACGACGATGGGAACGACATGCAGAGACAGCAGCCTCAGCAGCAACAGCCACAGCAACAACAGCAGGTCCTGAATGCTCATGCAAACTCCCTGGGACACCTCAACCAGGACCAGGTGCCCGCCGGCGCC
A_tiles_P11746:116	DGNDMQRQQPQQQQPQQQQQVLNAHANSLGHLNQDQVPAGALKQEVKSQLLGG	MCM1	P11746	116	0.00916655	0.619331	-1.48504	0.0100486	0.00758439	0.0101062	0.609873	0.632806	0.615543	0.0091172	0.813692	-0.841275	0.0100152	0.0082997	0.787686	0.840558	GACGGCAACGACATGCAGAGACAGCAGCCCCAGCAGCAACAGCCTCAACAACAGCAGCAAGTCCTCAATGCACACGCTAACTCCCTGGGTCATTTGAACCAGGATCAGGTGCCAGCCGGGGCCCTGAAACAGGAGGTGAAGAGCCAGCTCCTGGGCGGA
A_tiles_P11746:129	QPQQQQQVLNAHANSLGHLNQDQVPAGALKQEVKSQLLGGANPNQNSMIQQQQ	MCM1	P11746	129	0.00935899	0.632333	-1.42065	0.00989232	0.00822993	0.0100691	0.600386	0.686667	0.613282	0.00744468	0.664423	-1.66823	0.00810757	0.00683599	0.63765	0.69232	CAGCCCCAGCAGCAACAGCAGGTGTTGAACGCCCACGCCAATAGCCTCGGTCATCTCAATCAGGACCAAGTGCCAGCAGGCGCTCTGAAGCAGGAGGTCAAATCCCAGCTGCTGGGAGGGGCGAACCCTAACCAGAACTCTATGATCCAACAGCAGCAG
A_tiles_P11746:13	QQKERRKIEIKFIENKTRRHVTFSKRKHGIMKKAFELSVLTGTQVLLLVVSET	MCM1	P11746	13	0.0129073	0.872074	-0.42427	0.0143207	0.0121051	0.0124044	0.86915	1.01	0.755519	0.0127359	1.13665	0.522653	0.0144	0.0112641	1.13254	1.14078	CAGCAGAAGGAGCGGAGAAAGATTGAGATCAAGTTCATCGAAAACAAGACAAGGCGCCATGTTACGTTCAGCAAGCGCAAACACGGCATAATGAAAAAAGCCTTTGAACTGTCCGTCCTGACCGGAACTCAAGTGCTGTTGCTCGTGGTGTCTGAGACC
A_tiles_P11746:142	NSLGHLNQDQVPAGALKQEVKSQLLGGANPNQNSMIQQQQHHTQNSQPQQQQQ	MCM1	P11746	142	0.00988003	0.667536	-1.25272	0.0101254	0.0104562	0.00910935	0.614531	0.87242	0.554825	0.00791606	0.706492	-1.41772	0.00779674	0.0080372	0.613204	0.813973	AACAGCCTGGGCCACCTGAACCAGGACCAGGTGCCCGCCGGCGCATTGAAGCAGGAGGTCAAAAGTCAGCTGCTCGGGGGAGCTAATCCTAATCAGAACTCTATGATCCAACAGCAACAGCATCACACCCAGAACTCCCAGCCACAACAGCAGCAACAG
A_tiles_P11746:155	GALKQEVKSQLLGGANPNQNSMIQQQQHHTQNSQPQQQQQQQPQQQMSQQQMS	MCM1	P11746	155	0.0115447	0.78001	-0.770078	0.0111187	0.0112324	0.0123204	0.674816	0.937178	0.7504	0.00769947	0.687162	-1.53092	0.0120183	0.00493264	0.945223	0.499556	GGGGCCCTGAAGCAGGAGGTGAAATCTCAGCTCCTGGGCGGAGCTAATCCAAACCAGAACAGTATGATCCAGCAACAGCAACATCACACCCAGAACTCACAGCCTCAACAGCAGCAGCAACAACAGCCCCAACAGCAGATGAGCCAGCAGCAGATGTCC
A_tiles_P11746:168	GANPNQNSMIQQQQHHTQNSQPQQQQQQQPQQQMSQQQMSQHPRPQQGIPHPQ	MCM1	P11746	168	0.0096717	0.653461	-1.31877	0.0104117	0.00775024	0.0112117	0.631908	0.646643	0.682873	0.0106814	0.95329	-0.195194	0.0123735	0.00922064	0.973158	0.933827	GGCGCCAACCCCAACCAGAACAGTATGATTCAGCAGCAACAGCACCATACCCAGAATTCTCAGCCTCAACAGCAACAACAGCAGCAGCCCCAACAGCAGATGAGCCAGCAGCAGATGTCCCAGCACCCCAGGCCGCAGCAGGGGATCCCTCACCCACAG
A_tiles_P11746:181	QHHTQNSQPQQQQQQQPQQQMSQQQMSQHPRPQQGIPHPQQSQPQQQQQQQQQ	MCM1	P11746	181	0.0107476	0.726153	-0.991838	0.0117745	0.00838053	0.0125811	0.71462	0.699231	0.766281	0.0137091	1.22351	0.823109	0.0135401	0.0138802	1.06491	1.40573	CAGCACCACACCCAGAACAGCCAGCCTCAGCAGCAACAGCAGCAGCAGCCCCAGCAACAGATGAGTCAGCAGCAGATGTCCCAGCATCCACGCCCTCAGCAGGGCATCCCACACCCGCAGCAGTCTCAGCCCCAACAGCAACAACAACAGCAACAGCAG
A_tiles_P11746:194	QQQPQQQMSQQQMSQHPRPQQGIPHPQQSQPQQQQQQQQQLQQQQQQQQQQPL	MCM1	P11746	194	0.00972395	0.656991	-1.30207	0.00989091	0.00914168	0.0101687	0.6003	0.762738	0.619349	0.0127789	1.14049	0.536415	0.0121614	0.0134278	0.956475	1.35991	CAGCAGCAGCCCCAGCAGCAGATGAGCCAGCAGCAAATGTCCCAGCACCCCAGACCTCAGCAAGGCATCCCTCATCCGCAGCAGTCTCAGCCACAGCAACAGCAACAACAGCAGCAACAGTTGCAGCAACAGCAGCAGCAACAACAACAACAGCCCCTG
A_tiles_P11746:207	SQHPRPQQGIPHPQQSQPQQQQQQQQQLQQQQQQQQQQPLTGIHQPHQQAFAN	MCM1	P11746	207	0.0103281	0.697808	-1.11525	0.0116233	0.00825123	0.0114871	0.70544	0.688444	0.699648	0.00849574	0.758228	-1.12935	0.00919609	0.00784873	0.723261	0.794886	TCCCAGCACCCCAGGCCCCAGCAGGGGATCCCGCACCCACAGCAGAGCCAGCCTCAGCAACAACAGCAGCAACAACAACAGTTACAGCAGCAGCAGCAACAGCAACAGCAGCAGCCTCTGACCGGCATTCACCAGCCCCATCAGCAGGCCTTCGCTAAC
A_tiles_P11746:220	QQSQPQQQQQQQQQLQQQQQQQQQQPLTGIHQPHQQAFANAASPYLNAEQNAA	MCM1	P11746	220	0.0130274	0.880185	-0.395575	0.0131248	0.012355	0.0136344	0.796572	1.03084	0.830431	0.0100948	0.900942	-0.425649	0.00979366	0.0104052	0.770259	1.0538	CAGCAGTCCCAGCCCCAGCAGCAGCAACAACAGCAGCAACAGTTACAGCAACAACAACAGCAACAGCAGCAGCAGCCGCTGACTGGGATCCACCAGCCACATCAGCAGGCATTCGCTAATGCTGCGAGCCCTTACCTCAACGCCGAACAGAACGCCGCC
A_tiles_P11746:233	QLQQQQQQQQQQPLTGIHQPHQQAFANAASPYLNAEQNAAYQQYFQEPQQGQY	MCM1	P11746	233	0.0150936	1.01979	0.0607336	0.0138425	0.0121412	0.0204599	0.840129	1.013	1.24616	0.00850071	0.758671	-1.12696	0.00913385	0.00791146	0.718366	0.801238	CAGCTGCAGCAGCAACAGCAACAACAACAGCAGCAGCCGCTGACCGGCATCCATCAGCCCCACCAACAGGCATTTGCCAATGCTGCCTCACCTTACCTCAACGCTGAACAGAACGCGGCCTATCAGCAGTACTTCCAGGAGCCACAGCAGGGACAGTAC
A_tiles_P11746:26	ENKTRRHVTFSKRKHGIMKKAFELSVLTGTQVLLLVVSETGLVYTFSTPKFEP	MCM1	P11746	26	0.0134872	0.91125	-0.288065	0.0137297	0.0129556	0.0137925	0.833284	1.08095	0.840065	0.0142309	1.27008	0.975555	0.0150772	0.0134321	1.18581	1.36035	GAGAACAAGACCAGGCGCCACGTTACCTTCTCCAAGCGGAAGCATGGCATCATGAAAAAAGCCTTTGAGCTCAGTGTGTTGACTGGGACCCAGGTCCTGCTGCTCGTGGTGTCTGAAACAGGACTGGTCTACACATTCAGCACGCCCAAGTTCGAGCCT
A_tiles_P11746:39	KHGIMKKAFELSVLTGTQVLLLVVSETGLVYTFSTPKFEPIVTQQEGRNLIQA	MCM1	P11746	39	0.0138762	0.937534	-0.199926	0.0154602	0.0113263	0.0152583	0.938315	0.945012	0.929342	0.0152774	1.36348	1.26509	0.0177826	0.0131251	1.39858	1.32925	AAGCACGGCATTATGAAGAAGGCTTTCGAGCTGTCTGTCCTCACCGGCACCCAAGTCTTGCTCCTGGTTGTGAGCGAAACCGGGCTGGTGTACACTTTTTCCACACCTAAATTCGAGCCCATCGTGACGCAGCAGGAGGGACGCAACCTGATCCAGGCC
A_tiles_P11746:52	LTGTQVLLLVVSETGLVYTFSTPKFEPIVTQQEGRNLIQACLNAPDDEEEDEE	MCM1	P11746	52	0.0157036	1.061	0.183525	0.0186653	0.0129763	0.0159885	1.13284	1.08268	0.973816	0.0136258	1.21607	0.798244	0.0143678	0.012922	1.13001	1.30869	CTGACGGGCACCCAGGTGCTGCTCTTGGTGGTGTCCGAGACCGGACTCGTCTACACCTTTAGCACACCTAAGTTCGAACCCATTGTTACTCAGCAGGAAGGGAGAAATCTGATCCAAGCTTGCCTGAACGCCCCAGATGACGAAGAGGAGGACGAGGAG
A_tiles_P11746:65	TGLVYTFSTPKFEPIVTQQEGRNLIQACLNAPDDEEEDEEEDGDDDDDDDDDG	MCM1	P11746	65	0.011536	0.779424	-0.772407	0.00971189	0.0119441	0.0132347	0.589435	0.996558	0.806088	0.0119542	1.06689	0.26421	0.0133728	0.0106861	1.05176	1.08225	ACCGGACTGGTGTACACGTTCAGCACTCCCAAGTTTGAGCCAATCGTCACACAACAGGAGGGTAGAAACCTCATTCAGGCATGTCTGAATGCCCCTGATGACGAAGAAGAGGATGAAGAGGAGGACGGGGACGACGATGATGACGATGACGACGACGGC
A_tiles_P11746:78	PIVTQQEGRNLIQACLNAPDDEEEDEEEDGDDDDDDDDDGNDMQRQQPQQQQP	MCM1	P11746	78	0.00994307	0.671796	-1.233	0.0122232	0.00740893	0.0108548	0.741852	0.618166	0.661134	0.0141147	1.25971	0.942087	0.0145717	0.013672	1.14605	1.38464	CCCATCGTGACCCAGCAGGAGGGCCGGAACCTGATTCAGGCCTGCCTCAATGCTCCTGACGACGAGGAAGAAGACGAAGAGGAGGACGGAGATGATGACGACGACGATGACGATGATGGGAACGACATGCAACGCCAGCAGCCACAGCAACAGCAGCCG
A_tiles_P11746:91	ACLNAPDDEEEDEEEDGDDDDDDDDDGNDMQRQQPQQQQPQQQQQVLNAHANS	MCM1	P11746	91	0.0136903	0.924973	-0.241736	0.0159501	0.0111553	0.0144208	0.968047	0.930748	0.878332	0.019753	1.76291	2.31347	0.0178367	0.0218752	1.40283	2.21542	GCATGCCTGAACGCTCCCGACGATGAGGAAGAGGACGAGGAGGAAGACGGCGACGATGATGACGATGACGACGACGATGGGAATGACATGCAGAGACAGCAGCCTCAACAACAGCAGCCACAGCAGCAACAGCAGGTGCTCAACGCCCACGCCAACTCC
A_tiles_P11938:0	MSSPDDFETAPAEYVDALDPSMVVVDSGSAAVTAPSDSAAEVKANQNEENTGA	RAP1	P11938	0	0.0089085	0.601896	-1.57355	0.00908114	0.00835491	0.0093182	0.551153	0.697094	0.567545	0.00841988	0.751457	-1.16595	0.0123376	0.0057462	0.970337	0.58195	ATGTCCAGCCCCGACGACTTCGAGACTGCCCCGGCCGAATACGTCGACGCACTGGATCCTTCTATGGTCGTTGTGGATAGCGGATCAGCAGCTGTGACAGCCCCATCCGACAGTGCCGCGGAAGTGAAGGCTAATCAGAACGAGGAGAACACCGGCGCC
A_tiles_P11938:103	VTEPTTDDTAADEKKEQVSGPPLSNMKFYLNRDADAHDSLNDIDQLARLIRAN	RAP1	P11938	103	0.0177032	1.1961	0.555033	0.0237664	0.00967047	0.0241404	1.44243	0.806858	1.47033	0.0104744	0.934819	-0.27503	0.0111593	0.00983154	0.877665	0.995696	GTCACCGAGCCCACAACGGACGACACTGCCGCTGATGAGAAGAAGGAACAGGTGTCTGGCCCTCCACTGTCCAACATGAAATTCTACTTGAACAGAGATGCAGATGCCCACGACAGCCTGAATGACATTGACCAGCTGGCCAGGCTCATCCGCGCGAAC
A_tiles_P11938:116	KKEQVSGPPLSNMKFYLNRDADAHDSLNDIDQLARLIRANGGEVLDSKPRESK	RAP1	P11938	116	0.0181508	1.22634	0.632418	0.0205146	0.0139792	0.0208515	1.24507	1.16636	1.27001	0.0114189	1.01912	0.077268	0.0134458	0.00969757	1.0575	0.982128	AAGAAGGAGCAGGTGTCCGGACCACCTCTGTCTAACATGAAATTCTACCTCAATCGGGATGCTGATGCCCACGACAGTCTCAACGACATTGACCAGTTGGCCAGACTGATCCGCGCAAACGGCGGGGAAGTCCTGGACAGCAAACCCAGGGAGTCAAAG
A_tiles_P11938:129	KFYLNRDADAHDSLNDIDQLARLIRANGGEVLDSKPRESKENVFIVSPYNHTN	RAP1	P11938	129																	AAGTTTTATCTCAACCGCGACGCAGACGCCCATGACAGTTTGAACGATATCGATCAGCTGGCTCGGCTGATTAGGGCCAATGGAGGCGAAGTCCTGGACTCCAAACCTAGAGAGTCTAAGGAGAATGTGTTCATCGTGAGCCCCTACAACCACACCAAC
A_tiles_P11938:13	YVDALDPSMVVVDSGSAAVTAPSDSAAEVKANQNEENTGATAAETSEKVDQTE	RAP1	P11938	13	0.00901812	0.609302	-1.53564	0.00889849	0.006915	0.011919	0.540068	0.576955	0.725951	0.00731485	0.652836	-1.74002	0.00691658	0.00773605	0.54398	0.783474	TACGTGGACGCCCTGGACCCCTCCATGGTCGTTGTGGATTCTGGCAGTGCCGCTGTCACTGCTCCTTCAGATAGCGCCGCAGAGGTGAAAGCCAATCAGAACGAAGAAAACACAGGAGCGACCGCAGCCGAGACCTCCGAGAAGGTGGACCAGACGGAG
A_tiles_P11938:142	LNDIDQLARLIRANGGEVLDSKPRESKENVFIVSPYNHTNLPTVTPTYIKACC	RAP1	P11938	142	0.0177432	1.19881	0.562029	0.0178507	0.015135	0.0206756	1.08339	1.2628	1.25929	0.0102186	0.911992	-0.375907	0.012362	0.00844685	0.972259	0.85546	CTGAACGACATCGACCAGCTGGCTCGGCTCATACGCGCAAATGGCGGAGAAGTTCTGGATTCTAAACCTAGGGAGAGCAAGGAGAACGTGTTCATTGTGTCCCCATATAATCACACCAACTTGCCCACTGTCACGCCGACATACATCAAGGCCTGTTGC
A_tiles_P11938:155	NGGEVLDSKPRESKENVFIVSPYNHTNLPTVTPTYIKACCQSNSLLNMENYLV	RAP1	P11938	155	0.0162272	1.09638	0.285193	0.0178826	0.0126458	0.0188953	1.08533	1.05511	1.15086	0.0110955	0.990252	-0.0399716	0.0121484	0.0101339	0.955457	1.02631	AACGGCGGGGAGGTGCTGGACTCAAAACCACGCGAATCCAAGGAGAATGTGTTCATTGTTTCTCCCTACAACCACACCAATTTGCCGACAGTCACTCCTACCTATATCAAGGCCTGTTGCCAGAGTAATAGCCTGCTGAACATGGAGAACTACCTCGTG
A_tiles_P11938:168	KENVFIVSPYNHTNLPTVTPTYIKACCQSNSLLNMENYLVPYDNFREVVDSRL	RAP1	P11938	168	0.02156	1.45668	1.16593	0.0238325	0.0198567	0.0211772	1.44644	1.65675	1.28984	0.0101925	0.909659	-0.38636	0.0112012	0.00927456	0.880964	0.939287	AAGGAGAACGTTTTCATTGTCTCTCCTTACAACCACACCAATCTCCCAACAGTGACGCCGACTTATATCAAAGCCTGTTGCCAGAGTAATAGCCTGCTGAACATGGAGAATTACTTGGTGCCCTACGATAACTTTCGCGAAGTCGTGGACTCCCGGCTG
A_tiles_P11938:181	NLPTVTPTYIKACCQSNSLLNMENYLVPYDNFREVVDSRLQEESHSNGVDNSN	RAP1	P11938	181	0.0204665	1.38281	1.00461	0.0203116	0.0180693	0.0233587	1.23275	1.50761	1.42271	0.00962805	0.859284	-0.618821	0.0104416	0.00887791	0.821216	0.899116	AACCTGCCCACCGTGACACCAACTTACATCAAGGCCTGCTGTCAGTCAAATTCCCTGCTCAACATGGAGAACTATCTGGTCCCTTACGACAATTTCCGCGAAGTGGTTGATAGTAGATTGCAGGAGGAGAGCCACTCTAATGGCGTGGACAACTCCAAC
A_tiles_P11938:193	CCQSNSLLNMENYLVPYDNFREVVDSRLQEESHSNGVDNSNSNSDNKDSIRPK	RAP1	P11938	193	0.0145744	0.984707	-0.0477665	0.0155	0.0141906	0.0140747	0.940729	1.18399	0.857251	0.00920528	0.821553	-0.802047	0.00919996	0.0092106	0.723565	0.93281	TGCTGTCAGTCCAACAGCCTGCTGAACATGGAGAACTACCTCGTCCCTTATGACAATTTCAGAGAGGTTGTGGATTCCCGGTTGCAGGAAGAGAGTCACAGCAATGGCGTGGATAATTCTAACTCAAACAGCGACAACAAAGACTCCATCCGCCCCAAG
A_tiles_P11938:206	LVPYDNFREVVDSRLQEESHSNGVDNSNSNSDNKDSIRPKTEIISTNTNGATE	RAP1	P11938	206	0.00982182	0.663604	-1.27103	0.00565456	0.0104727	0.0159999	0.343187	0.873794	0.97451								CTGGTGCCCTACGACAATTTCCGGGAGGTTGTCGATAGTAGACTCCAGGAAGAAAGCCACTCTAATGGGGTGGATAACAGCAACTCAAATAGCGACAACAAGGACTCCATCCGCCCTAAAACAGAGATCATTTCCACTAACACGAACGGCGCCACCGAG
A_tiles_P11938:219	RLQEESHSNGVDNSNSNSDNKDSIRPKTEIISTNTNGATEDSTSEKVMVDAEQ	RAP1	P11938	219	0.00854085	0.577056	-1.70418	0.00860658	0.00966066	0.00749317	0.522351	0.80604	0.456388	0.0074004	0.660471	-1.69257	0.0050572	0.0108293	0.397742	1.09674	CGCCTGCAGGAGGAGTCTCACAGCAACGGCGTGGATAATTCCAACAGCAATTCCGATAACAAGGACAGTATCCGGCCCAAAACTGAGATTATCTCCACCAACACAAATGGAGCTACCGAAGACTCAACGAGCGAAAAGGTCATGGTGGACGCCGAGCAG
A_tiles_P11938:232	SNSNSDNKDSIRPKTEIISTNTNGATEDSTSEKVMVDAEQQARLQEQAQLLRQ	RAP1	P11938	232	0.0112746	0.761758	-0.843468	0.0144505	0.008759	0.011323	0.877034	0.73081	0.689653	0.0093324	0.832898	-0.746082	0.00810757	0.0107423	0.63765	1.08793	TCCAACAGCAACAGCGACAATAAGGACTCTATCCGCCCCAAGACAGAGATTATCTCCACCAACACTAATGGCGCAACGGAAGACTCAACCAGTGAAAAAGTGATGGTCGATGCTGAGCAACAGGCCAGACTCCAGGAGCAGGCCCAGCTGCTGCGGCAG
A_tiles_P11938:245	KTEIISTNTNGATEDSTSEKVMVDAEQQARLQEQAQLLRQHVSSTASITSGGH	RAP1	P11938	245																	AAGACGGAGATTATCTCCACCAACACTAATGGGGCCACAGAGGACTCAACATCCGAAAAAGTGATGGTGGATGCTGAGCAACAGGCCAGACTCCAGGAACAGGCACAGCTGCTGCGCCAGCATGTCAGTAGCACCGCGTCTATCACCAGCGGAGGCCAC
A_tiles_P11938:258	EDSTSEKVMVDAEQQARLQEQAQLLRQHVSSTASITSGGHNDLVQIEQPQKDT	RAP1	P11938	258	0.00974353	0.658314	-1.29584	0.00838703	0.00790795	0.0139469	0.509027	0.659802	0.849466	0.0082716	0.738224	-1.23844	0.00853015	0.0080209	0.670885	0.812322	GAGGACTCCACCTCTGAGAAAGTTATGGTGGACGCCGAACAGCAGGCACGCCTGCAAGAACAGGCTCAGCTGCTCAGACAACATGTGAGTAGCACGGCCTCAATTACATCCGGCGGACACAACGATTTGGTCCAGATCGAGCAGCCCCAGAAGGACACT
A_tiles_P11938:26	SGSAAVTAPSDSAAEVKANQNEENTGATAAETSEKVDQTEVEKKDDDDTTEVG	RAP1	P11938	26	0.00890787	0.601853	-1.57377	0.0119733	0.00729917	0.00808787	0.726685	0.609008	0.49261	0.0106747	0.952694	-0.197743	0.0122265	0.00931981	0.961601	0.94387	TCCGGGAGCGCCGCCGTGACCGCACCCAGTGATTCAGCCGCGGAGGTCAAGGCTAATCAGAACGAGGAAAACACAGGAGCAACTGCCGCTGAAACGTCTGAAAAAGTTGACCAGACAGAGGTGGAGAAGAAGGACGATGACGACACCACCGAGGTGGGC
A_tiles_P11938:271	QQARLQEQAQLLRQHVSSTASITSGGHNDLVQIEQPQKDTSNNNNSNVNDEDN	RAP1	P11938	271	0.0102403	0.691878	-1.1417	0.0103256	0.00828124	0.0125583	0.626681	0.690947	0.764888	0.008241	0.735492	-1.25357	0.00856273	0.00793135	0.673448	0.803253	CAGCAGGCCCGGCTCCAGGAACAGGCTCAGCTGCTGCGCCAGCATGTGAGTAGCACAGCATCTATTACTTCAGGAGGCCACAATGATTTGGTCCAGATCGAGCAACCCCAAAAGGACACCAGCAATAACAACAATTCCAACGTGAACGACGAGGACAAC
A_tiles_P11938:284	QHVSSTASITSGGHNDLVQIEQPQKDTSNNNNSNVNDEDNDLLTQDNNPQTAD	RAP1	P11938	284	0.0069274	0.468044	-2.35315	0.00852819	0.00700002	0.0055687	0.517594	0.584049	0.339174	0.00670824	0.598697	-2.09326	0.00783881	0.00574072	0.616513	0.581396	CAGCACGTGTCCAGCACGGCCTCTATTACATCCGGCGGACATAATGATCTCGTGCAAATCGAACAGCCTCAGAAGGACACCAGCAACAATAACAACAGTAACGTCAACGATGAGGACAACGATCTGCTGACTCAGGACAATAATCCCCAGACCGCTGAC
A_tiles_P11938:297	HNDLVQIEQPQKDTSNNNNSNVNDEDNDLLTQDNNPQTADEGNASFQAQRSMI	RAP1	P11938	297	0.0118208	0.798666	-0.696819	0.0110314	0.0118146	0.0126734	0.669521	0.985754	0.771902	0.00991631	0.885011	-0.498445	0.0108058	0.00910007	0.84986	0.921616	CACAACGACCTGGTGCAGATCGAACAGCCCCAGAAGGACACAAGCAACAATAACAACTCTAACGTCAACGACGAGGACAACGATCTGCTCACCCAAGATAATAATCCTCAAACTGCTGATGAGGGCAATGCCAGTTTCCAGGCACAGCGCTCCATGATT
A_tiles_P11938:310	TSNNNNSNVNDEDNDLLTQDNNPQTADEGNASFQAQRSMISRGALPSHNKASF	RAP1	P11938	310	0.0114016	0.770341	-0.808741	0.0107177	0.0109314	0.0126509	0.650478	0.912064	0.770532	0.00769155	0.686455	-1.53512	0.00916324	0.00645621	0.720678	0.653857	ACCTCCAACAATAACAACTCAAACGTGAACGACGAGGACAACGACCTCCTGACTCAGGATAATAATCCACAGACAGCAGATGAAGGAAATGCCAGCTTTCAGGCGCAAAGAAGTATGATCTCCCGCGGCGCTCTGCCCAGCCACAACAAGGCCTCTTTC
A_tiles_P11938:322	DNDLLTQDNNPQTADEGNASFQAQRSMISRGALPSHNKASFTDEEDEFILDVV	RAP1	P11938	322	0.02251	1.52087	1.29959	0.0221076	0.0198037	0.026052	1.34176	1.65233	1.58675	0.0126492	1.12892	0.494793	0.0125896	0.0127092	0.990154	1.28713	GACAACGACTTGCTGACTCAGGATAACAACCCTCAGACAGCCGATGAGGGAAATGCGTCTTTTCAGGCACAAAGGTCAATGATTAGTCGCGGCGCTCTCCCCAGCCACAATAAGGCCTCCTTCACCGATGAAGAGGACGAGTTCATCCTGGACGTGGTC
A_tiles_P11938:335	ADEGNASFQAQRSMISRGALPSHNKASFTDEEDEFILDVVRKNPTRRTTHTLY	RAP1	P11938	335	0.0121303	0.819572	-0.616725	0.0127419	0.0097651	0.014345	0.773331	0.814754	0.873716	0.00792419	0.707218	-1.41353	0.00886176	0.00708581	0.696967	0.71762	GCCGACGAGGGCAACGCTTCATTCCAGGCCCAGCGCTCTATGATTAGTAGAGGAGCACTGCCCTCCCACAATAAAGCGAGCTTTACAGATGAAGAGGATGAGTTCATCCTCGACGTCGTGCGCAAGAACCCTACTCGGAGGACCACGCATACCCTGTAC
A_tiles_P11938:348	MISRGALPSHNKASFTDEEDEFILDVVRKNPTRRTTHTLYDEISHYVPNHTGN	RAP1	P11938	348	0.0148707	1.00473	0.014628	0.0173277	0.0108176	0.0175439	1.05165	0.902572	1.06855	0.0114573	1.02254	0.0909592	0.0154781	0.00848102	1.21733	0.858921	ATGATTTCCAGAGGGGCCCTGCCCAGTCACAACAAGGCTTCTTTCACCGACGAAGAGGATGAGTTTATCCTGGATGTGGTCCGGAAAAATCCTACGAGGCGCACAACTCATACCCTCTATGACGAGATCAGCCACTACGTGCCAAACCACACCGGCAAC
A_tiles_P11938:361	SFTDEEDEFILDVVRKNPTRRTTHTLYDEISHYVPNHTGNSIRHRFRVYLSKR	RAP1	P11938	361	0.0130162	0.791377	-0.725235	0.0123025		0.0137712	0.746664		0.838768	0.0109376	1.10771	0.417412		0.0109376		1.10771	TCCTTCACGGACGAGGAGGACGAGTTTATCCTCGACGTGGTGAGAAAAAATCCCACAAGGCGGACTACCCACACCCTGTACGATGAAATTAGCCATTATGTTCCTAACCACACCGGCAACAGTATCCGCCACCGCTTCAGGGTCTACCTGTCTAAGCGG
A_tiles_P11938:374	VRKNPTRRTTHTLYDEISHYVPNHTGNSIRHRFRVYLSKRLEYVYEVDKFGKL	RAP1	P11938	374	0.0109213	0.737891	-0.942134	0.0113834	0.00977481	0.0117071	0.69088	0.815564	0.713044	0.0148235	1.32296	1.14201	0.0179106	0.0122684	1.40865	1.24249	GTGCGCAAGAACCCCACGAGGAGAACCACTCACACCCTGTACGATGAAATCTCCCACTATGTGCCTAACCACACAGGGAATTCTATTCGGCATCGGTTCAGGGTCTATCTGAGCAAACGCTTGGAGTACGTTTACGAGGTGGACAAGTTTGGCAAGCTC
A_tiles_P11938:387	YDEISHYVPNHTGNSIRHRFRVYLSKRLEYVYEVDKFGKLVRDDDGNLIKTKV	RAP1	P11938	387	0.0129866	0.877427	-0.405301	0.0144505	0.00932671	0.0162506	0.877034	0.778177	0.98978	0.00906113	0.808687	-0.866451	0.0105882	0.00775426	0.832752	0.785318	TACGACGAGATCTCCCACTACGTTCCCAACCATACAGGCAATTCTATCCGCCACCGGTTTCGCGTGTATCTGAGCAAGAGATTGGAGTACGTCTATGAAGTGGACAAATTCGGGAAACTGGTGAGGGATGATGACGGAAACCTCATTAAGACCAAGGTC
A_tiles_P11938:39	AEVKANQNEENTGATAAETSEKVDQTEVEKKDDDDTTEVGVTTTTPSIADTAA	RAP1	P11938	39	0.00611382	0.413075	-2.74039	0.00858001	0.00410578	0.00648715	0.520739	0.342567	0.395114	0.0102766	0.917164	-0.35283	0.00987009	0.0106998	0.77627	1.08363	GCCGAGGTGAAGGCGAACCAGAACGAGGAGAATACCGGCGCTACAGCAGCTGAAACGAGCGAAAAAGTGGACCAGACTGAGGTCGAAAAAAAGGACGATGACGATACCACAGAGGTTGGAGTGACCACTACCACGCCCTCCATCGCCGACACCGCCGCC
A_tiles_P11938:400	NSIRHRFRVYLSKRLEYVYEVDKFGKLVRDDDGNLIKTKVLPPSIKRKFSADE	RAP1	P11938	400	0.0122049	0.824615	-0.597714	0.0124075	0.0107222	0.0136657	0.753039	0.894612	0.83234	0.0125713	1.12197	0.469584	0.0129327	0.0122201	1.01714	1.2376	AACTCCATCCGCCACCGCTTTCGGGTGTACCTGAGTAAGAGATTGGAGTACGTGTATGAAGTCGACAAGTTCGGCAAACTGGTTCGGGATGATGACGGAAATCTCATTAAAACCAAAGTGCTGCCACCCAGCATCAAGAGGAAGTTCTCTGCCGACGAG
A_tiles_P11938:413	RLEYVYEVDKFGKLVRDDDGNLIKTKVLPPSIKRKFSADEDYTLAIAVKKQFY	RAP1	P11938	413	0.0153655	1.03816	0.116075	0.0182419	0.0119302	0.0166695	1.10714	0.995403	1.01529	0.0101406	0.905029	-0.407178	0.0107764	0.00954232	0.847551	0.966405	CGCCTGGAGTACGTGTACGAGGTCGACAAGTTTGGCAAATTGGTTCGGGATGATGACGGAAACCTGATCAAGACAAAGGTGCTGCCACCCAGCATTAAAAGGAAATTCTCCGCTGACGAAGACTATACCCTCGCAATCGCCGTGAAGAAGCAGTTCTAC
A_tiles_P11938:426	LVRDDDGNLIKTKVLPPSIKRKFSADEDYTLAIAVKKQFYRDLFQIDPDTGRS	RAP1	P11938	426	0.0168549	1.13879	0.402834	0.0205527	0.0141823	0.0164272	1.24739	1.18331	1.00053	0.00874799	0.78074	-1.00996	0.00981291	0.00779864	0.771773	0.789812	CTGGTGCGCGACGATGACGGCAACTTGATCAAGACAAAAGTGCTGCCACCCTCCATTAAACGGAAGTTTAGCGCAGATGAGGATTACACTCTCGCCATAGCTGTCAAGAAGCAGTTCTATAGAGACCTGTTCCAGATCGACCCTGACACCGGGAGGTCT
A_tiles_P11938:439	VLPPSIKRKFSADEDYTLAIAVKKQFYRDLFQIDPDTGRSLITDEDTPTAIAR	RAP1	P11938	439	0.0215144	1.4536	1.15937	0.024059	0.0166238	0.0248988	1.46019	1.38701	1.51652	0.00971795	0.867307	-0.580898	0.0111772	0.00844924	0.87907	0.855702	GTGCTGCCCCCTTCTATCAAGAGAAAGTTCAGCGCTGATGAGGACTATACTTTGGCGATTGCCGTCAAAAAACAGTTCTACCGGGACCTGTTTCAGATAGATCCAGATACCGGCAGGTCCCTCATCACAGACGAAGACACGCCGACCGCAATCGCCCGC
A_tiles_P11938:451	DEDYTLAIAVKKQFYRDLFQIDPDTGRSLITDEDTPTAIARRNMTMDPNHVPG	RAP1	P11938	451	0.0207207	1.39998	1.04286	0.0232667	0.0152178	0.0251262	1.4121	1.2697	1.53037	0.0110272	0.984157	-0.0651625	0.0127376	0.00954652	1.00179	0.96683	GACGAGGACTACACTCTGGCCATCGCTGTCAAGAAACAGTTCTATAGAGACCTCTTTCAGATCGACCCAGATACCGGACGGTCCCTGATTACAGATGAAGATACCCCTACCGCCATAGCAAGGCGCAATATGACGATGGACCCCAACCACGTGCCGGGC
A_tiles_P11938:464	FYRDLFQIDPDTGRSLITDEDTPTAIARRNMTMDPNHVPGSEPNFAAYRTQSR	RAP1	P11938	464	0.0165709	1.1196	0.350161	0.0150788	0.014638	0.0206153	0.915166	1.22133	1.25562	0.010906	0.973337	-0.110272	0.011934	0.00996649	0.938597	1.00936	TTCTACCGCGACCTGTTCCAGATTGACCCCGACACCGGCCGCAGCCTCATCACCGATGAAGATACACCCACGGCTATCGCCCGGAGAAACATGACTATGGACCCAAATCACGTGCCTGGATCTGAGCCGAACTTTGCAGCCTATAGGACCCAGTCCCGG
A_tiles_P11938:477	RSLITDEDTPTAIARRNMTMDPNHVPGSEPNFAAYRTQSRRGPIAREFFKHFA	RAP1	P11938	477	0.0151224	1.02174	0.0666483	0.0188732	0.0101204	0.0181059	1.14545	0.844402	1.10278	0.00942893	0.841513	-0.704093	0.0105339	0.00843985	0.82848	0.854751	CGCTCCCTGATCACCGACGAGGACACTCCCACGGCCATCGCTAGACGGAACATGACAATGGATCCTAATCATGTGCCAGGATCTGAACCCAACTTTGCCGCATACCGGACCCAGAGCCGCAGGGGCCCGATTGCCAGGGAGTTCTTCAAGCACTTCGCG
A_tiles_P11938:490	ARRNMTMDPNHVPGSEPNFAAYRTQSRRGPIAREFFKHFAEEHAAHTENAWRD	RAP1	P11938	490	0.0151419	1.02305	0.0706373	0.0166653	0.0107287	0.019417	1.01145	0.89515	1.18263	0.010831	0.966642	-0.138435	0.0127405	0.00920766	1.00202	0.932512	GCCCGCCGGAACATGACAATGGATCCCAACCACGTGCCTGGAAGCGAACCAAATTTTGCTGCTTACCGCACTCAGTCCAGACGGGGCCCGATCGCGAGGGAATTCTTTAAGCATTTCGCCGAGGAGCACGCAGCCCACACCGAGAACGCCTGGAGGGAC
A_tiles_P11938:503	GSEPNFAAYRTQSRRGPIAREFFKHFAEEHAAHTENAWRDRFRKFLLAYGIDD	RAP1	P11938	503	0.0184727	1.24809	0.686909	0.0243853	0.0154489	0.0167326	1.47999	1.28898	1.01914	0.0136322	1.21664	0.800158	0.0143746	0.0129281	1.13054	1.3093	GGGAGCGAGCCCAACTTCGCCGCGTATAGGACACAGTCCCGGAGAGGACCTATTGCACGCGAATTTTTCAAACACTTTGCTGAGGAGCACGCCGCTCATACCGAAAATGCCTGGAGGGATCGGTTCCGCAAGTTCCTGCTCGCCTACGGCATCGACGAC
A_tiles_P11938:516	RRGPIAREFFKHFAEEHAAHTENAWRDRFRKFLLAYGIDDYISYYEAEKAQNR	RAP1	P11938	516	0.0202311	1.3669	0.968743	0.0314278	0.0171652	0.0153495	1.90742	1.43219	0.934894	0.018868	1.68393	2.12645	0.0218163	0.0163182	1.71583	1.65263	AGACGCGGGCCCATCGCCAGGGAGTTCTTCAAGCACTTCGCGGAAGAGCACGCTGCACATACCGAAAACGCTTGGCGCGATCGGTTTAGGAAATTTCTGCTCGCCTATGGCATTGACGACTACATCTCCTACTACGAGGCCGAGAAGGCCCAGAATCGG
A_tiles_P11938:52	ATAAETSEKVDQTEVEKKDDDDTTEVGVTTTTPSIADTAATANIASTSGASVT	RAP1	P11938	52	0.00726157	0.490622	-2.20713	0.00820037	0.00654018	0.00713951	0.497697	0.545682	0.434848	0.00603584	0.538687	-2.52424	0.00699477	0.00520837	0.55013	0.527482	GCTACGGCCGCCGAGACGAGTGAGAAGGTGGACCAGACCGAGGTCGAAAAAAAGGACGACGATGACACCACAGAAGTGGGAGTTACAACCACTACACCCTCTATTGCAGATACTGCTGCGACCGCAAACATCGCCTCCACTAGCGGCGCCTCAGTGACC
A_tiles_P11938:529	AEEHAAHTENAWRDRFRKFLLAYGIDDYISYYEAEKAQNREPEPMKNLTNRPK	RAP1	P11938	529	0.0211931	1.4319	1.11274	0.0265369	0.0171477	0.0209184	1.61058	1.43072	1.27408	0.0202393	1.80632	2.41272	0.020823	0.0196719	1.63771	1.99229	GCCGAGGAGCACGCAGCCCATACAGAGAACGCTTGGCGCGATCGGTTTAGAAAATTCCTGCTGGCCTACGGCATTGACGACTACATCAGCTACTATGAAGCGGAAAAAGCTCAGAATCGCGAACCTGAGCCAATGAAGAACCTCACCAACAGGCCCAAG
A_tiles_P11938:542	DRFRKFLLAYGIDDYISYYEAEKAQNREPEPMKNLTNRPKRPGVPTPGNYNSA	RAP1	P11938	542	0.018054	1.2198	0.61585	0.0220714	0.0110287	0.0241751	1.33956	0.92018	1.47244	0.012331	1.10051	0.390815	0.015014	0.0101274	1.18083	1.02566	GACCGCTTCCGGAAGTTTCTGCTGGCCTATGGCATCGACGATTACATTTCCTACTATGAGGCTGAGAAGGCACAGAACAGAGAGCCCGAACCTATGAAAAATCTCACAAATAGGCCTAAACGCCCAGGGGTGCCCACCCCGGGAAACTACAACAGCGCC
A_tiles_P11938:555	DYISYYEAEKAQNREPEPMKNLTNRPKRPGVPTPGNYNSAAKRARNYSSQRNV	RAP1	P11938	555	0.0181852	1.22867	0.638289	0.0176922	0.0160976	0.0211159	1.07377	1.34311	1.28611	0.0123035	1.09806	0.3817	0.0130454	0.0116037	1.026	1.17518	GACTACATCTCCTACTATGAGGCTGAGAAGGCACAGAACCGGGAGCCAGAACCTATGAAAAATCTGACCAATAGACCGAAACGGCCCGGCGTCCCTACACCCGGAAATTATAACTCTGCGGCCAAGCGCGCCCGCAACTACAGCAGTCAGAGGAACGTG
A_tiles_P11938:568	REPEPMKNLTNRPKRPGVPTPGNYNSAAKRARNYSSQRNVQPTANAASANAAA	RAP1	P11938	568	0.0127019	0.858193	-0.474002	0.0126327	0.00983295	0.0164977	0.766706	0.820415	1.00483	0.0132406	1.1817	0.681235	0.0143234	0.0122397	1.12652	1.23958	CGCGAGCCGGAACCCATGAAGAACCTGACCAACCGGCCCAAGAGACCAGGAGTCCCTACACCTGGCAACTATAATAGTGCAGCTAAAAGGGCCCGGAATTACTCTTCCCAGCGCAACGTGCAGCCCACTGCAAACGCGGCCAGCGCCAATGCCGCCGCT
A_tiles_P11938:580	PKRPGVPTPGNYNSAAKRARNYSSQRNVQPTANAASANAAAAAAAAASNSYAI	RAP1	P11938	580	0.0149714	1.01153	0.0355421	0.0119954	0.012118	0.0230858	0.728023	1.01107	1.40609	0.00758004	0.676503	-1.59471	0.00722311	0.00795461	0.568088	0.805608	CCCAAGCGGCCCGGGGTGCCAACACCTGGCAACTACAACTCTGCAGCCAAAAGGGCTAGAAATTATTCCTCACAGCGCAATGTCCAGCCGACCGCGAATGCTGCAAGTGCCAACGCTGCTGCCGCAGCCGCCGCGGCCGCCAGCAACAGCTACGCCATC
A_tiles_P11938:593	SAAKRARNYSSQRNVQPTANAASANAAAAAAAAASNSYAIPENELLDEDTMNF	RAP1	P11938	593	0.0116864	0.789586	-0.732258	0.0137106	0.00910197	0.0127896	0.832125	0.759426	0.778976	0.00749674	0.669069	-1.6398	0.00966008	0.00581787	0.759754	0.589208	TCCGCCGCCAAGAGGGCCCGGAATTATAGTTCCCAGCGCAACGTGCAGCCTACAGCCAATGCTGCTTCTGCGAATGCTGCAGCTGCCGCAGCCGCGGCCGCAAGCAACTCATACGCCATCCCCGAAAACGAGCTGCTCGATGAGGACACCATGAACTTC
[truncated: 6,635 more rows]

## Sheet: Pulldown, AD mutants
	protein sequence	Med15 pulldown	Med15 enrichment	Med15 Z score	Med15 pulldown rep1	Med15 pulldown rep2	Med15 pulldown rep3	Med15 enrichment rep1	Med15 enrichment rep2	Med15 enrichment rep3	TFIID pulldown	TFIID enrichment	TFIID Z score	TFIID pulldown rep1	TFIID pulldown rep2	TFIID enrichment rep1	TFIID enrichment rep2	DNA
[truncated: 2,908 more rows]

[truncated: 1 more sheets: Med15 binding domains]
