# Supplementary material for: Simple biochemical features underlie transcriptional activation domain diversity and dynamic, fuzzy binding to Mediator
Source: eLife journal article supplement (doi:10.7554/elife.68068), 2021-04-27
Supplement: supp [file elife-68068-supp-v2.zip › elife_poa_e68068_Figure_6_source_data_1.xlsx]

## Sheet: Sheet1
Core AD protein	Core AD start position	Activator-Binding Domain	Core AD Sequence	Activator-Binding Domain PDB code	# Structural Models
Ace2	54	KIX	LLGMDYYNIDDLL	2K0N	50000
Cha4	623	KIX	EYNFDFTLLNEID	2K0N	50000
Crz1	253	KIX	NLDELDDLLSLTY	2K0N	50000
Gal4	861	KIX	MDDVYNYLFDDED	2K0N	50000
Gln3	64	KIX	LEALPDDLYFTDF	2K0N	50000
Leu3	858	KIX	MAGWDNWESDMVW	2K0N	50000
Oaf1	1033	KIX	LDLFDYDFLFGND	2K0N	50000
Oaf3	847	KIX	FDVIEDIFDPVDF	2K0N	50000
Pdr1	1052	KIX	DLEDLYSILWSDV	2K0N	50000
Pip2	979	KIX	DIFGSLDFFDYDL	2K0N	50000
Ppr1	805	KIX	FDIPLDEFFTELE	2K0N	50000
Pul4	140	KIX	TDFDDFLKLLGDN	2K0N	50000
Put3	927	KIX	DDLQQLLEDLGNI	2K0N	50000
Rdr1	526	KIX	THLLDIDWDALLD	2K0N	50000
Rds1	814	KIX	NFDAFWDLLGENL	2K0N	50000
Rsf2	587	KIX	IDDKWLSEFINNS	2K0N	50000
Rsf2	689	KIX	DSVMMDYDLSNFF	2K0N	50000
Sef1	1133	KIX	NDDFFGWFDMNME	2K0N	50000
Stb4	933	KIX	FDDDLFSNLLWFD	2K0N	50000
Sum1	1031	KIX	ETIDNMLIFDFLD	2K0N	50000
Tda9	457	KIX	IESEEWLSKFIMD	2K0N	50000
Tec1	228	KIX	SNLFYDIFEEIID	2K0N	50000
Tog1	773	KIX	PDLLNLFWEDTEF	2K0N	50000
Urc2	740	KIX	FNSFEDFFQDFFD	2K0N	50000
War1	931	KIX	LNDEFWTDLFMND	2K0N	50000
YKL222C	670	KIX	LEDFSENFIDDIL	2K0N	50000
YLR278C	1328	KIX	EDFWTINDDYGFL	2K0N	50000
Yrm1	759	KIX	EFWTAYNLGWEEL	2K0N	50000
Ace2	54	ABD1	LLGMDYYNIDDLL	2LPB	50000
Cha4	623	ABD1	EYNFDFTLLNEID	2LPB	50000
Crz1	253	ABD1	NLDELDDLLSLTY	2LPB	50000
Gal4	861	ABD1	MDDVYNYLFDDED	2LPB	50000
Gln3	64	ABD1	LEALPDDLYFTDF	2LPB	50000
Leu3	858	ABD1	MAGWDNWESDMVW	2LPB	50000
Oaf1	1033	ABD1	LDLFDYDFLFGND	2LPB	50000
Oaf3	847	ABD1	FDVIEDIFDPVDF	2LPB	50000
Pdr1	1052	ABD1	DLEDLYSILWSDV	2LPB	50000
Pip2	979	ABD1	DIFGSLDFFDYDL	2LPB	50000
Ppr1	805	ABD1	FDIPLDEFFTELE	2LPB	50000
Pul4	140	ABD1	TDFDDFLKLLGDN	2LPB	50000
Put3	927	ABD1	DDLQQLLEDLGNI	2LPB	50000
Rdr1	526	ABD1	THLLDIDWDALLD	2LPB	50000
Rds1	814	ABD1	NFDAFWDLLGENL	2LPB	50000
Rsf2	587	ABD1	IDDKWLSEFINNS	2LPB	50000
Rsf2	689	ABD1	DSVMMDYDLSNFF	2LPB	50000
Sef1	1133	ABD1	NDDFFGWFDMNME	2LPB	50000
Stb4	933	ABD1	FDDDLFSNLLWFD	2LPB	50000
Sum1	1031	ABD1	ETIDNMLIFDFLD	2LPB	50000
Tda9	457	ABD1	IESEEWLSKFIMD	2LPB	50000
Tec1	228	ABD1	SNLFYDIFEEIID	2LPB	50000
Tog1	773	ABD1	PDLLNLFWEDTEF	2LPB	50000
Urc2	740	ABD1	FNSFEDFFQDFFD	2LPB	50000
War1	931	ABD1	LNDEFWTDLFMND	2LPB	50000
YKL222C	670	ABD1	LEDFSENFIDDIL	2LPB	50000
YLR278C	1328	ABD1	EDFWTINDDYGFL	2LPB	50000
Yrm1	759	ABD1	EFWTAYNLGWEEL	2LPB	50000
Oaf1	1033	KIX	LDLFDYDFLFGND	2K0N	500000
Pdr1	1052	KIX	DLEDLYSILWSDV	2K0N	500000
Pip2	979	KIX	DLEDLYSILWSDV	2K0N	500000
Pul4	140	KIX	TDFDDFLKLLGDN	2K0N	500000
Stb4	933	KIX	FDDDLFSNLLWFD	2K0N	500000
War1	931	KIX	LNDEFWTDLFMND	2K0N	500000
