# Supplementary figures and images for: Simple biochemical features underlie transcriptional activation domain diversity and dynamic, fuzzy binding to Mediator
Source: eLife journal article supplement (doi:10.7554/elife.68068), 2021-04-27

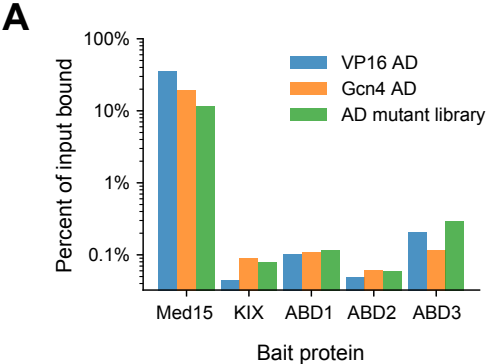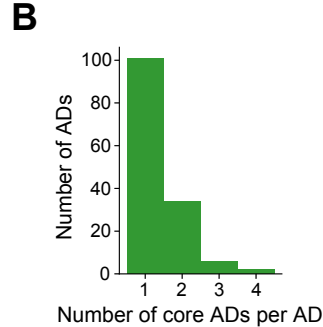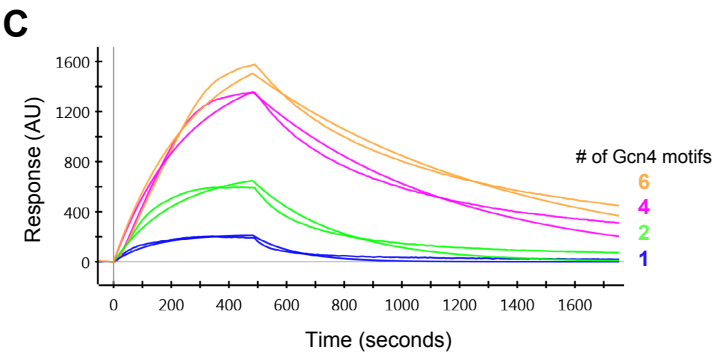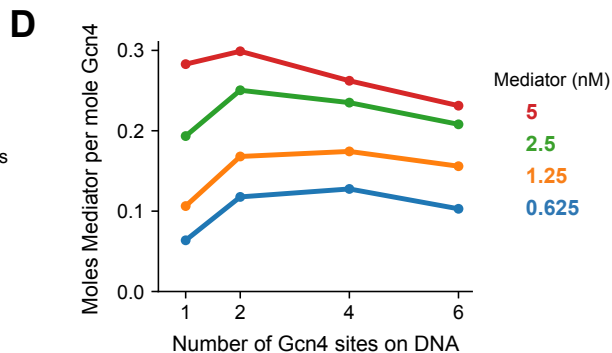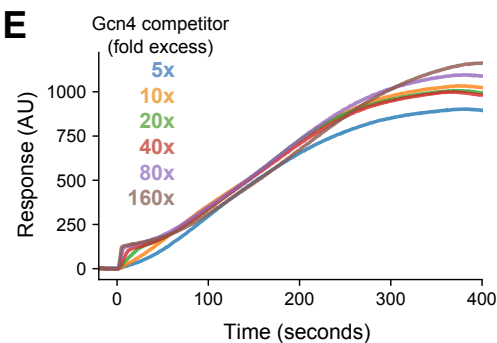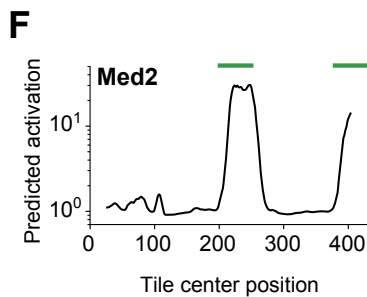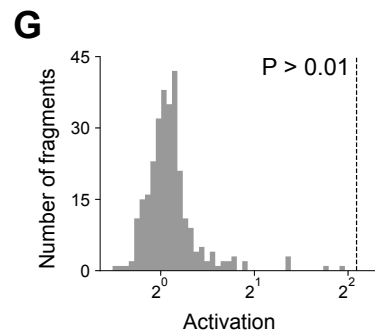

Supplement: supp [file elife-68068-supp-v1.zip]

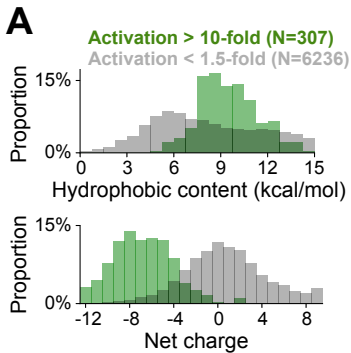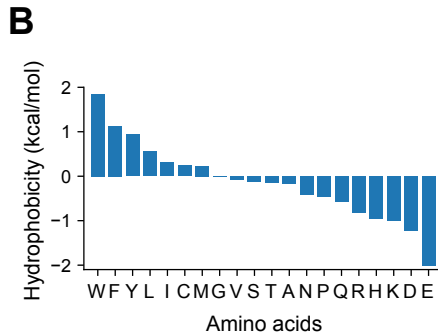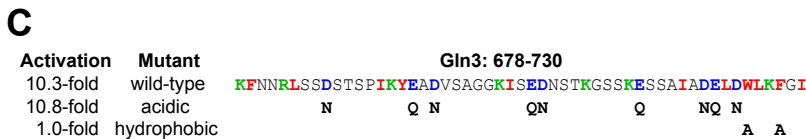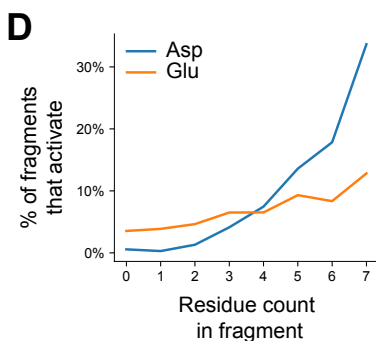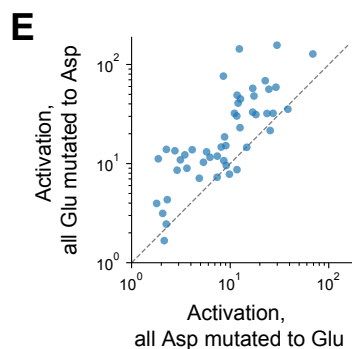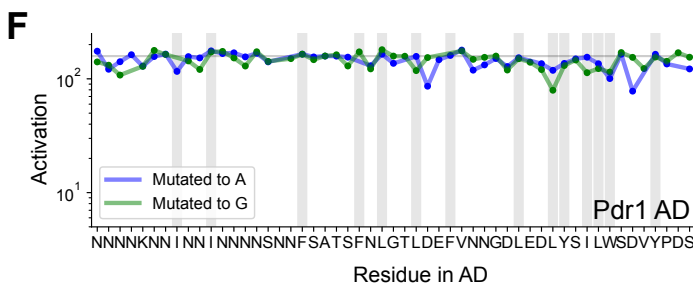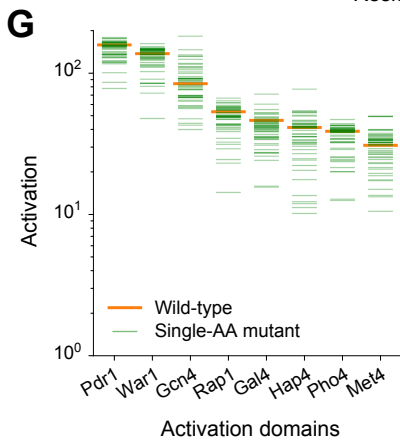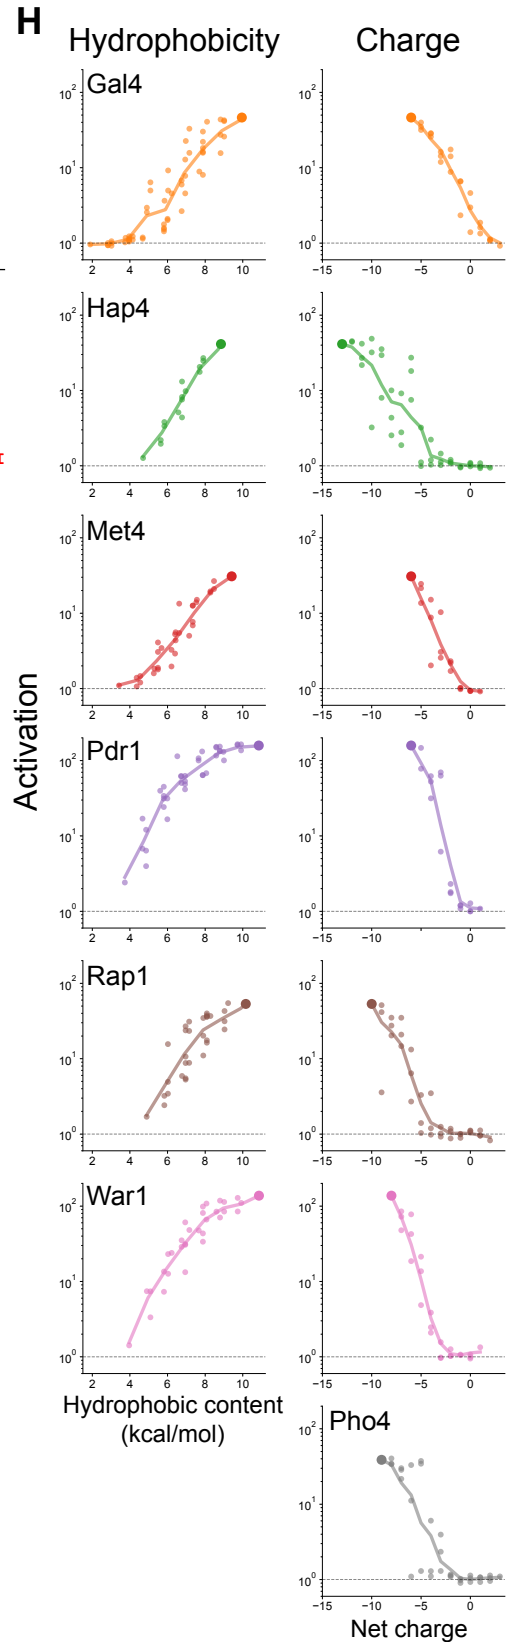

Supplement: supp [file elife-68068-supp-v1.zip]

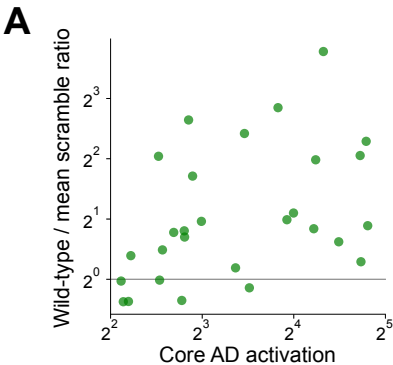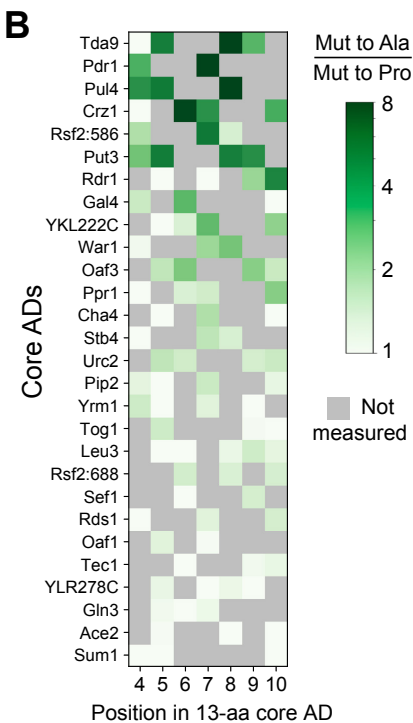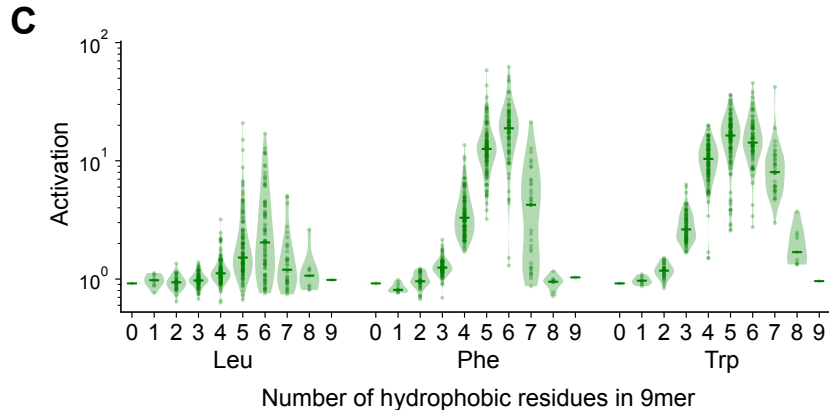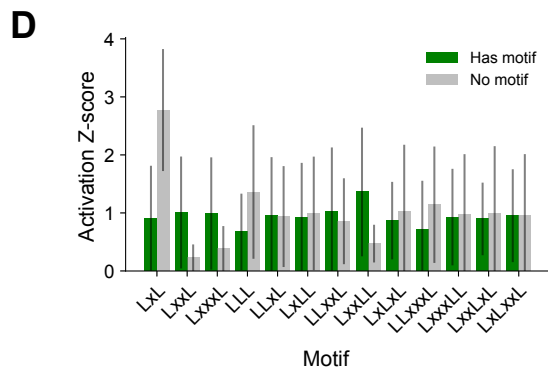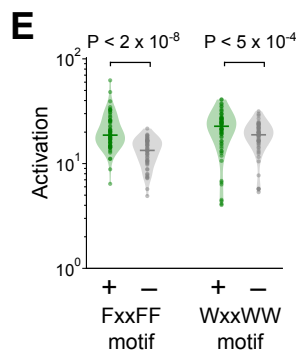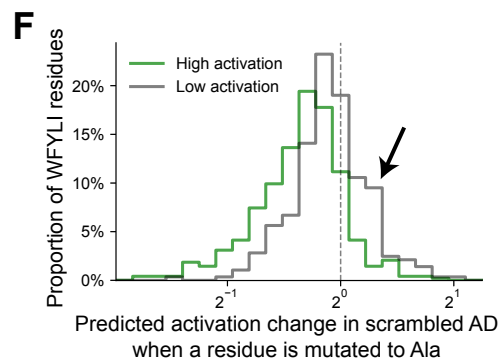

Supplement: supp [file elife-68068-supp-v1.zip]

**A**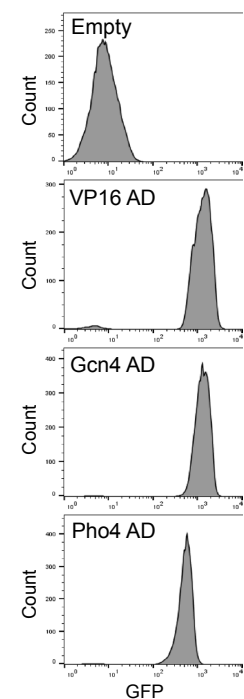**D**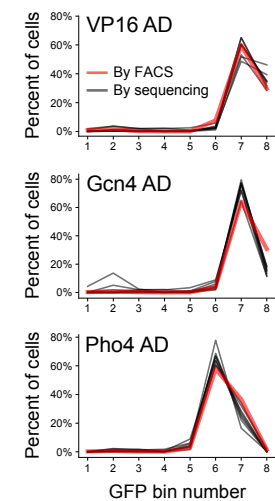**B**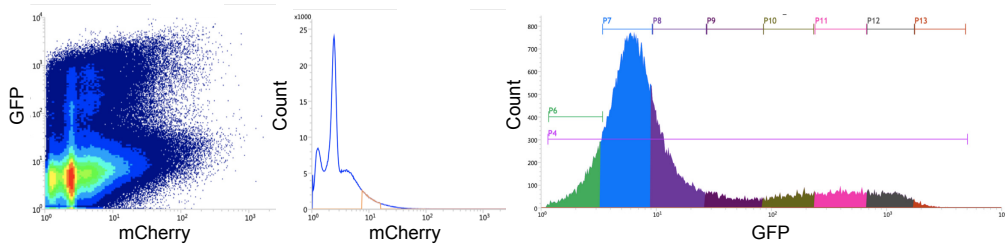**C**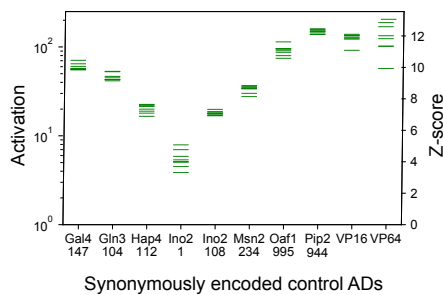**G**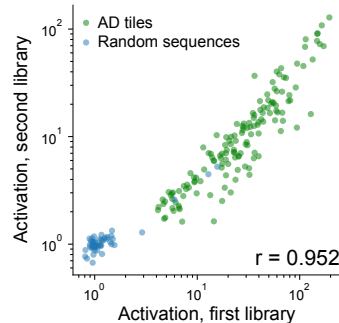**H**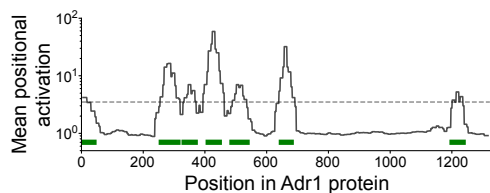**I**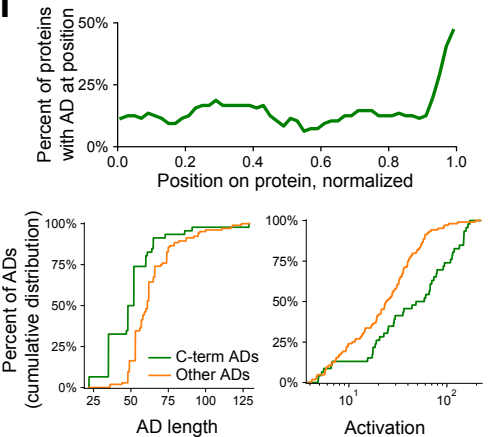**J**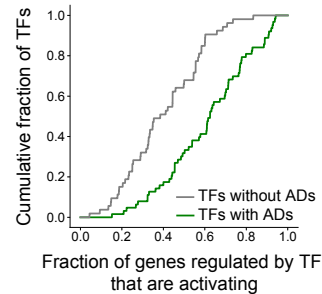**F**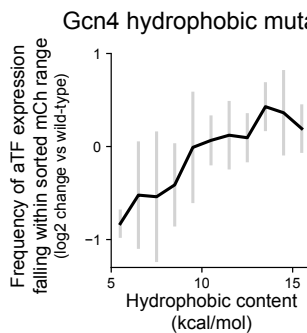**E**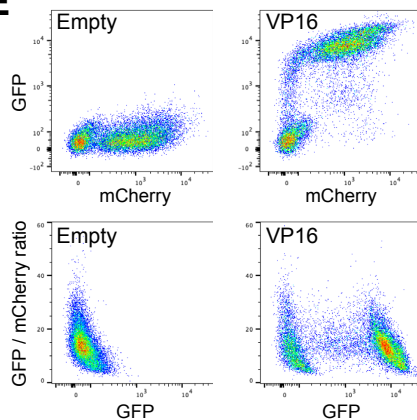

Supplement: supp [file elife-68068-supp-v1.zip]

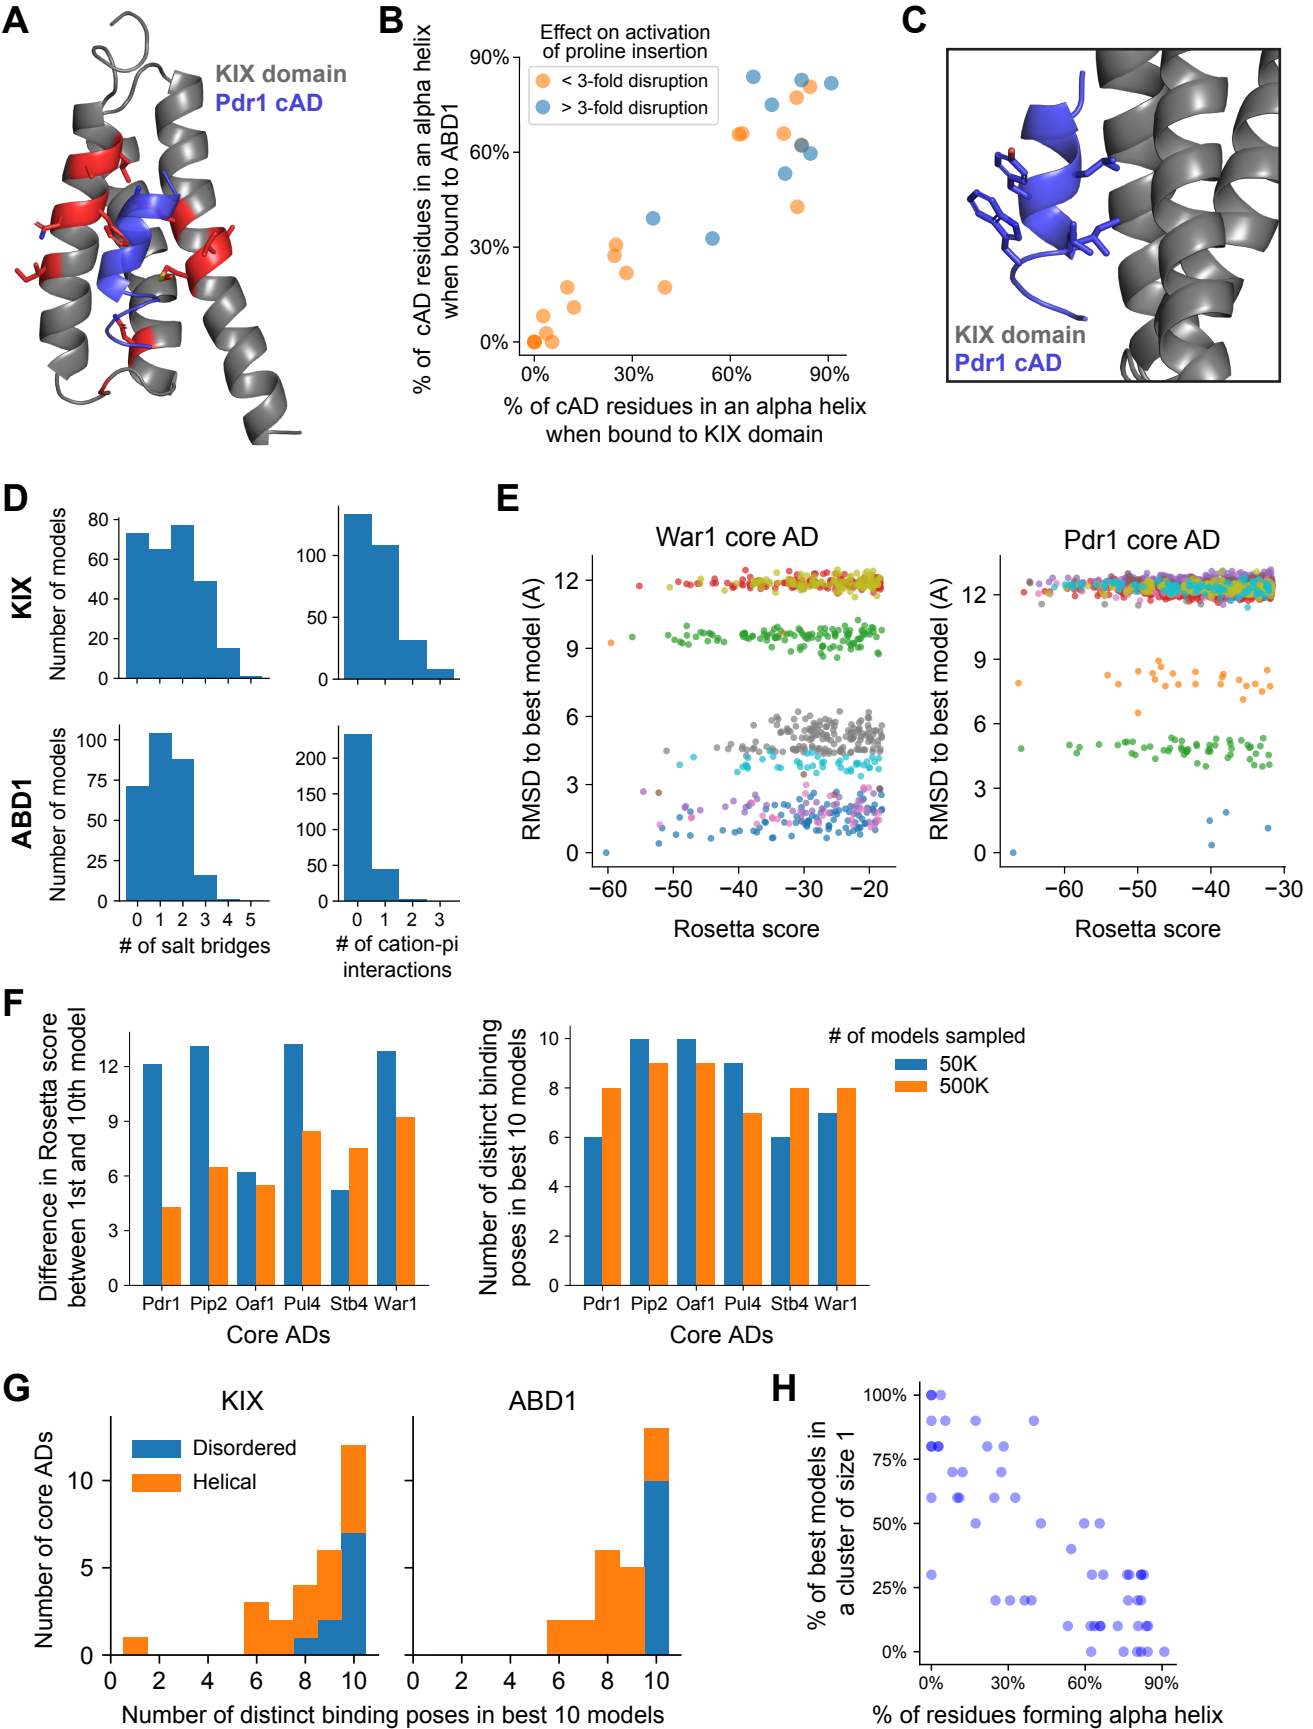

Supplement: supp [file elife-68068-supp-v1.zip]

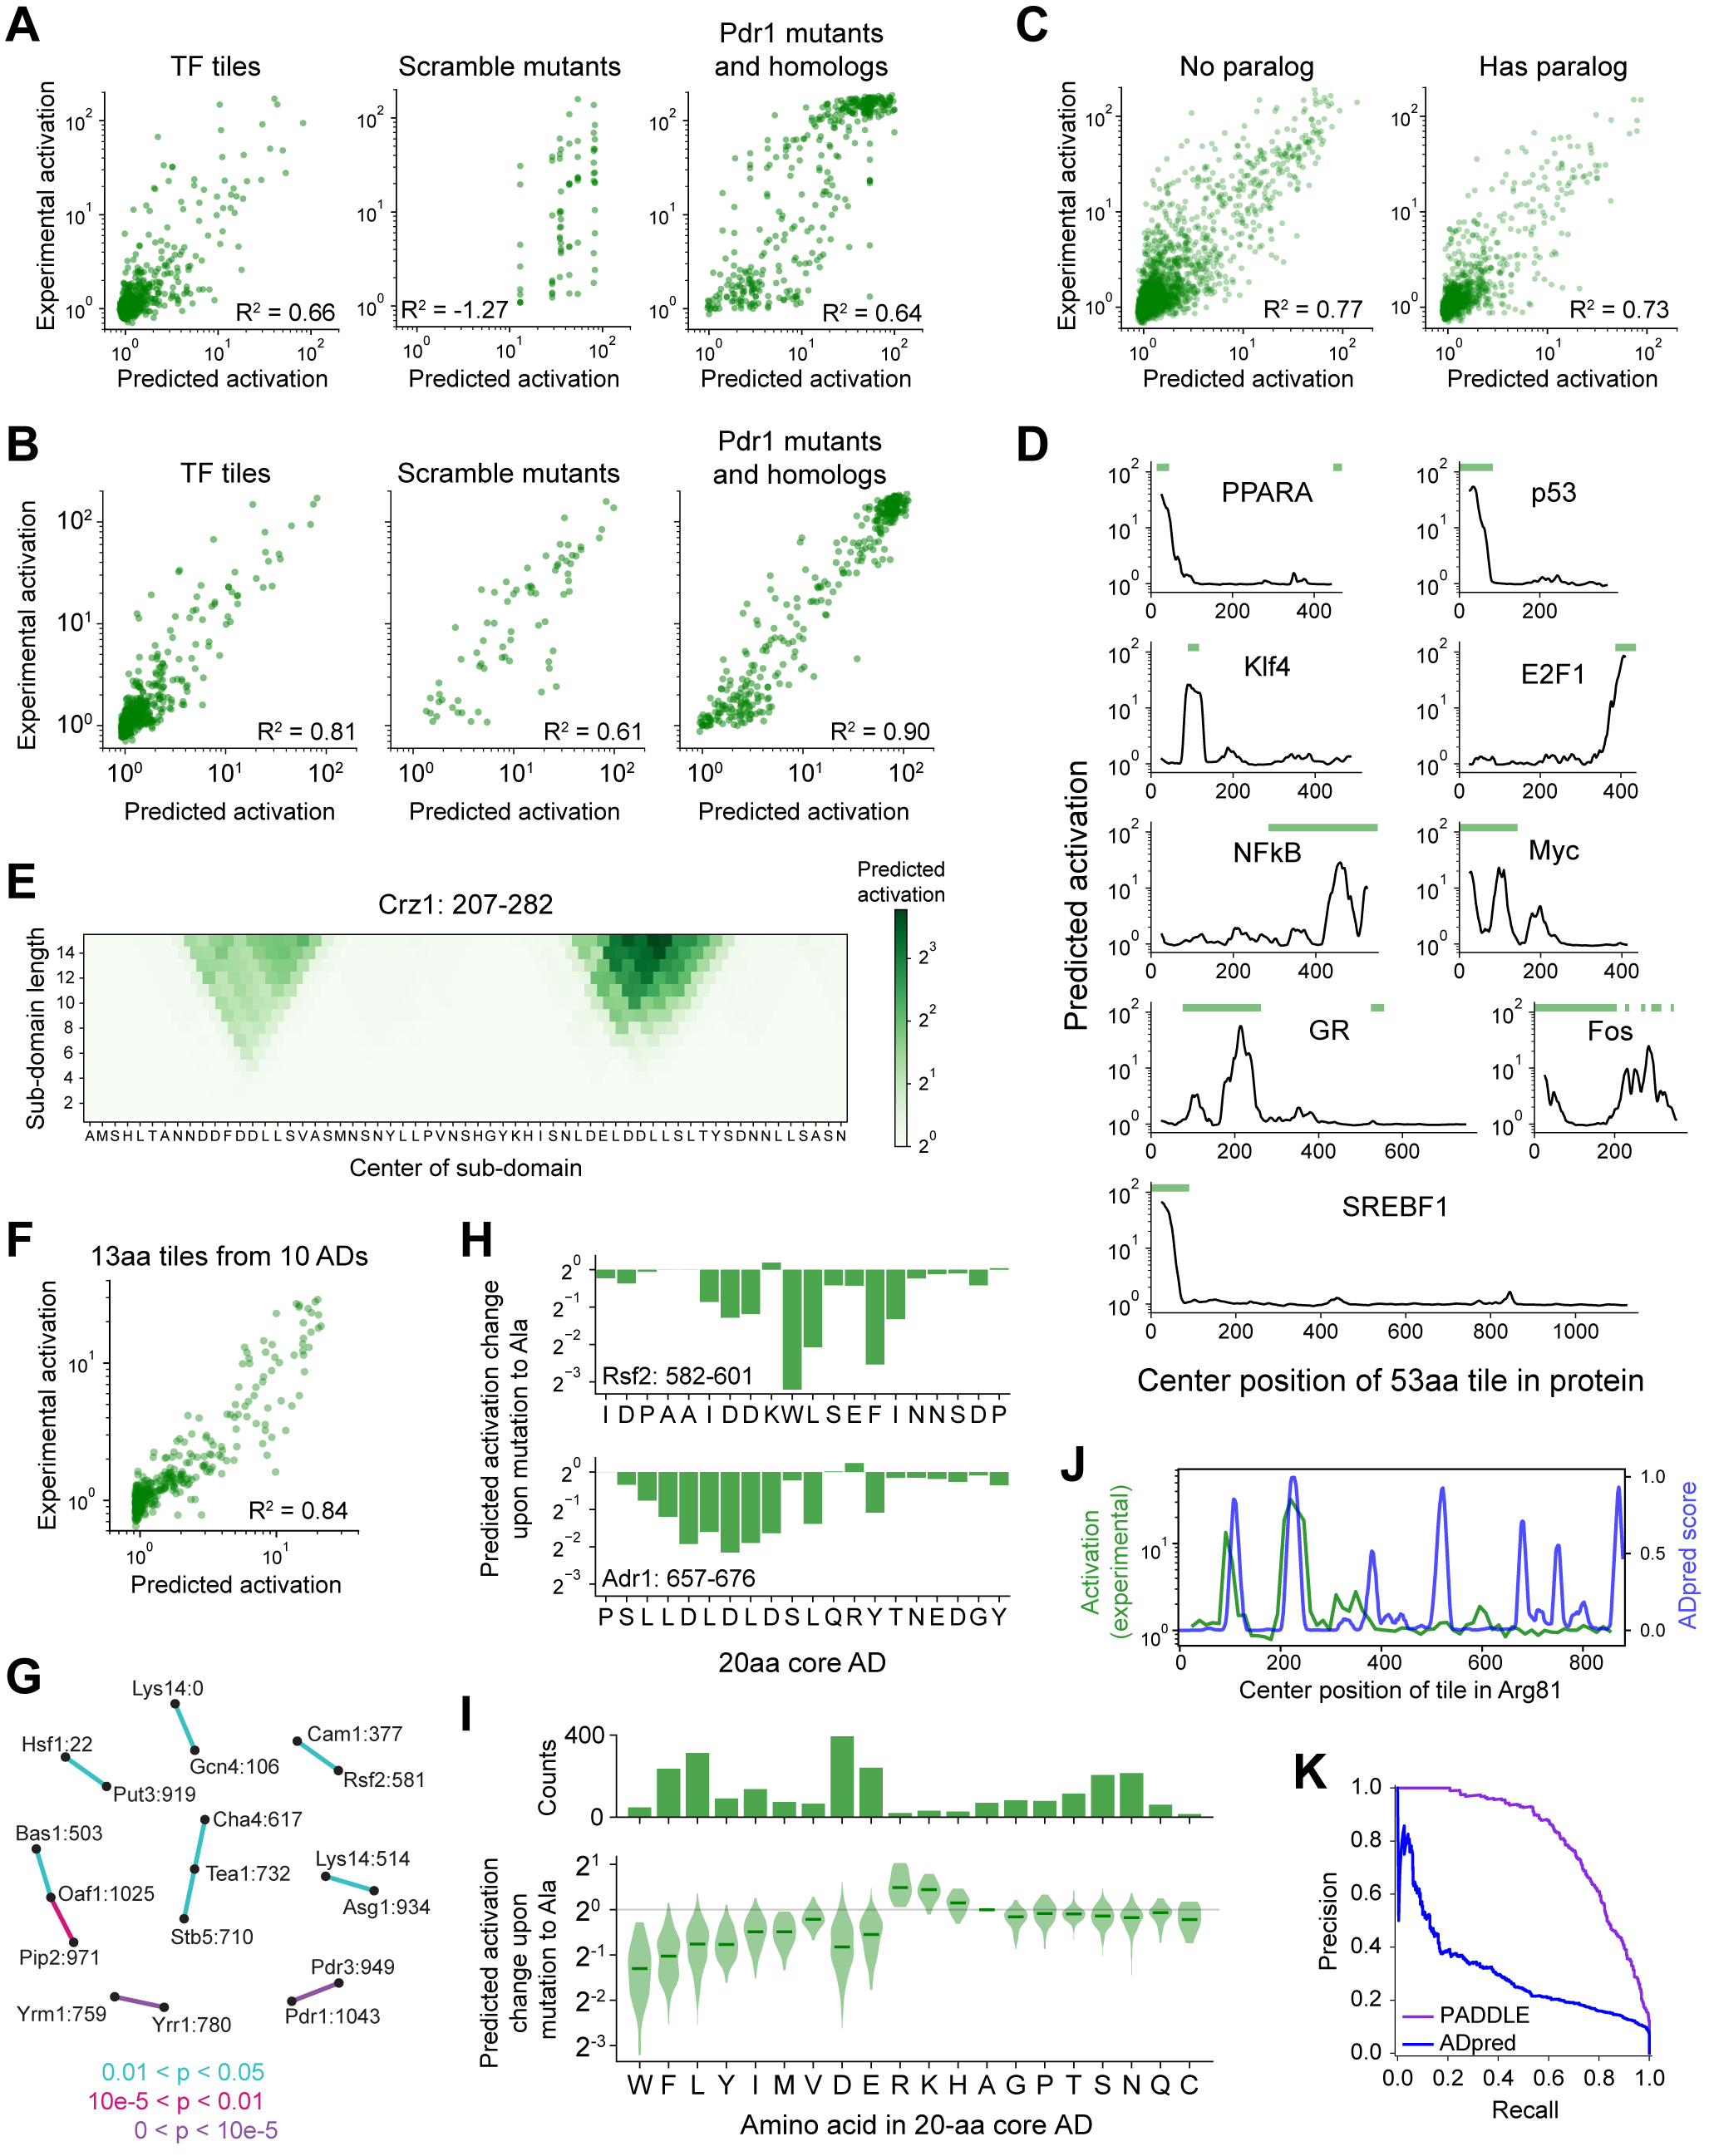

Supplement: supp [file elife-68068-supp-v2.zip › elife_poa_e68068_Figure_3_figure_supplement_1.tif]

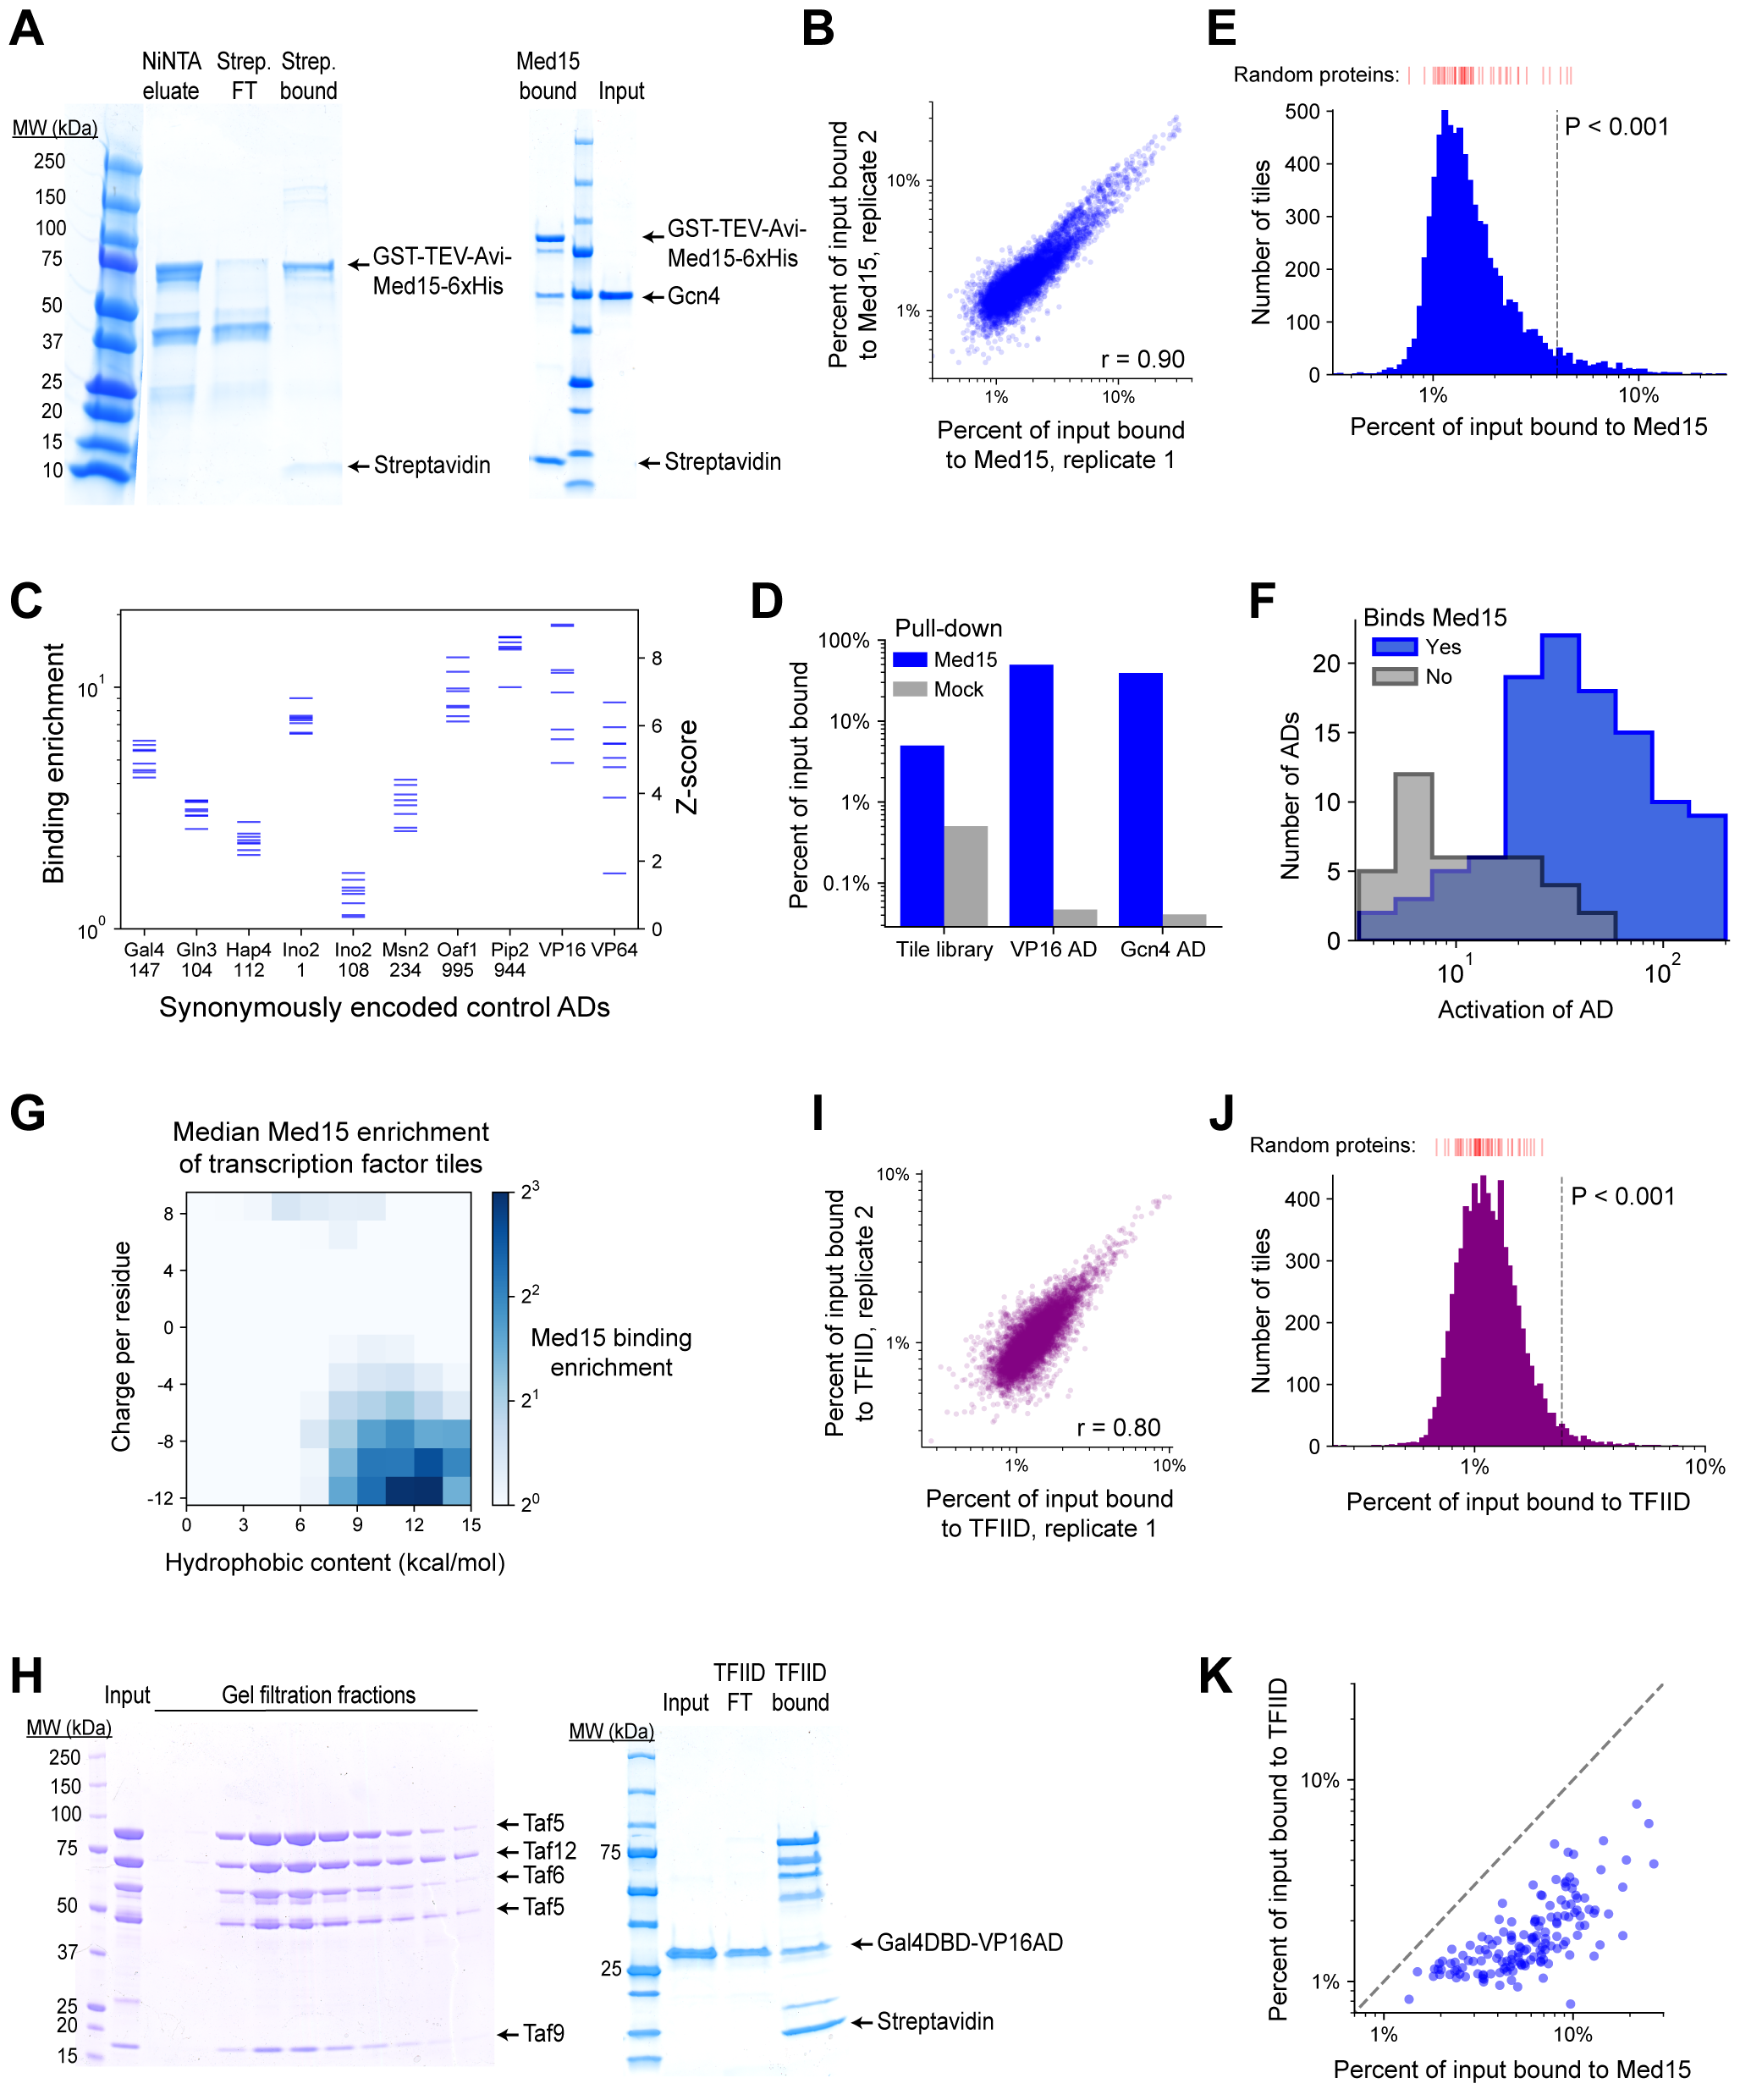

Supplement: supp [file elife-68068-supp-v2.zip › elife_poa_e68068_Figure_5_figure_supplement_1.tif]
